# Supplementary material
Source: PubMed Central journal article supplement (PMC3842852)
Supplement: ac400646m_si_003.pdf [file ac400646m_si_003.pdf]

| prot_acc                        | pep_rank | pep_exp_mz | pep_exp_mr | pep_exp_z | pep_score | pep_expect | pep_seq        | pep_var_mod  | pep_var_mod_pos   |
|---------------------------------|----------|------------|------------|-----------|-----------|------------|----------------|--------------|-------------------|
| GPSGXVSAQLXR 6 8 5 0 1371_1370  | 1        | 675.8392   | 1349.6638  | 2         | 87.72     | 2.50E-09   | GPSGSVSAQLLR   | Phospho (ST) | 0.0000001000000.0 |
| GPSGXVSAQLXR 8 8 0 0 1761_1760  | 1        | 660.8371   | 1319.6596  | 2         | 84.3      | 3.70E-09   | GPSGVVSAQLAR   | Phospho (ST) | 0.0000001000000.0 |
| GPSGXVSAQLXR 0 4 0 0 81_80      | 1        | 625.798    | 1249.5815  | 2         | 81.61     | 6.90E-09   | GPSGAVSQAQLAR  | Phospho (ST) | 0.0000001000000.0 |
| GPSGXVSAQLXR 5 5 5 0 1111_1110  | 1        | 464.2531   | 1389.7375  | 3         | 79.96     | 1.00E-08   | GPSGLVSLAQLLR  | Phospho (ST) | 0.0000001000000.0 |
| GPSGXVSAQLXR 5 8 3 0 1167_1166  | 1        | 705.8599   | 1409.7053  | 2         | 78.83     | 1.30E-08   | GPSGLVSAQLFR   | Phospho (ST) | 0.0000001000000.0 |
| GPSGXVSAQLXR 3 9 0 0 781_780    | 1        | 716.8343   | 1431.654   | 2         | 76.03     | 2.50E-08   | GPSGFVSAQLAR   | Phospho (ST) | 0.0000001000000.0 |
| GPSGXVSAQLXR 2 1 8 0 437_436    | 1        | 697.8198   | 1393.6251  | 2         | 74.94     | 3.20E-08   | GPSGEVSDAQLVR  | Phospho (ST) | 0.0000001000000.0 |
| GPSGXVSAQLXR 0 5 8 0 117_116    | 1        | 667.8453   | 1333.676   | 2         | 74.71     | 3.40E-08   | GPSGAVSLAQLVR  | Phospho (ST) | 0.0000001000000.0 |
| GPSGXVSAQLXR 0 4 5 0 91_90      | 1        | 646.8214   | 1291.6283  | 2         | 74.69     | 3.40E-08   | GPSGAVSQAQLLR  | Phospho (ST) | 0.0000001000000.0 |
| GPSGXVSAQLXR 3 0 5 0 611_610    | 1        | 691.8446   | 1381.6747  | 2         | 73.66     | 4.30E-08   | GPSGFVSAQLLR   | Phospho (ST) | 0.0000001000000.0 |
| GPSGXVSAQLXR 1 9 7 0 395_394    | 1        | 715.8185   | 1429.6224  | 2         | 73.66     | 4.50E-08   | GPSGDVSAQLTR   | Phospho (ST) | 0.0000001000000.0 |
| GPSGXVSAQLXR 5 5 3 0 1107_1106  | 1        | 712.8685   | 1423.7225  | 2         | 72.32     | 5.90E-08   | GPSGLVSLAQLFR  | Phospho (ST) | 0.0000001000000.0 |
| GPSGXVSAQLXR 5 0 0 0 1001_1000  | 1        | 653.8292   | 1305.6439  | 2         | 71.86     | 6.50E-08   | GPSGLVSAQAQLAR | Phospho (ST) | 0.0000001000000.0 |
| GPSGXVSAQLXR 5 5 0 0 1011_1010  | 1        | 674.8526   | 1347.6906  | 2         | 71.71     | 6.70E-08   | GPSGLVSAQAQLLR | Phospho (ST) | 0.0000001000000.0 |
| SXPFKXSPLXFRG 5 5 5 0 1111_1110 | 1        | 518.9528   | 1553.8366  | 3         | 71.65     | 6.80E-08   | SLPFKLSPLLFGR  | Phospho (ST) | 0.0000001000000.0 |
| SXPFKXSPLXFRG 4 5 0 1 902_901   | 1        | 476.9143   | 1427.7212  | 3         | 69.91     | 1.00E-07   | SGPFKLSPLAFGK  | Phospho (ST) | 0.0000001000000.0 |
| GPSGXVSAQLXR 8 8 3 0 1767_1766  | 1        | 698.8525   | 1395.6905  | 2         | 69.22     | 1.20E-07   | GPSGVVSAQLFR   | Phospho (ST) | 0.0000001000000.0 |
| GPSGXVSAQLXR 2 1 1 1 424_423    | 1        | 691.7951   | 1381.5757  | 2         | 68.8      | 1.30E-07   | GPSGEVSDAQLDK  | Phospho (ST) | 0.0000001000000.0 |
| GPSGXVSAQLXR 0 2 8 0 57_56      | 1        | 675.8243   | 1349.634   | 2         | 67.88     | 1.60E-07   | GPSGAVSEAQLVR  | Phospho (ST) | 0.0000001000000.0 |
| GPSGXVSAQLXR 5 5 1 0 1103_1102  | 1        | 696.8475   | 1391.6805  | 2         | 67.85     | 1.60E-07   | GPSGLVSLAQLDR  | Phospho (ST) | 0.0000001000000.0 |
| GPSGXVSAQLXR 5 3 8 0 1077_1076  | 1        | 705.8612   | 1409.7079  | 2         | 67.1      | 1.90E-07   | GPSGLVSAQLVR   | Phospho (ST) | 0.0000001000000.0 |
| GPSGXVSAQLXR 5 8 8 0 1177_1176  | 1        | 681.8611   | 1361.7077  | 2         | 66.86     | 2.10E-07   | GPSGLVSAQLVR   | Phospho (ST) | 0.0000001000000.0 |
| GPSGXVSAQLXR 8 1 0 0 1621_1620  | 1        | 668.8165   | 1335.6185  | 2         | 66.39     | 2.30E-07   | GPSGVVSDAQLTR  | Phospho (ST) | 0.0000001000000.0 |
| GPSGXVSAQLXR 2 2 9 0 459_458    | 1        | 736.8241   | 1471.6336  | 2         | 64.98     | 3.20E-07   | GPSGEVSEAQLYR  | Phospho (ST) | 0.0000001000000.0 |
| SXPFKXSPLXFRG 0 9 9 0 199_198   | 1        | 538.2564   | 1611.7474  | 3         | 64.78     | 3.30E-07   | SAPFKYSPLYFGR  | Phospho (ST) | 0.0000001000000.0 |
| GPSGXVSAQLXR 5 8 6 0 1173_1172  | 1        | 675.8428   | 1349.6711  | 2         | 64.76     | 3.30E-07   | GPSGLVSAQLSR   | Phospho (ST) | 0.0000001000000.0 |
| SXPFKXSPLXFRG 4 5 5 1 912_911   | 1        | 490.9302   | 1469.7688  | 3         | 64.72     | 3.50E-07   | SGPFKLSPLLFGR  | Phospho (ST) | 0.0000001000000.0 |
| SXPFKXSPLXFRG 0 3 5 0 71_70     | 1        | 516.2653   | 1545.7741  | 3         | 64.53     | 3.50E-07   | SAPFKFSPLLFGK  | Phospho (ST) | 0.0000001000000.0 |
| GPSGXVSAQLXR 9 4 4 0 1889_1888  | 1        | 664.8036   | 1327.5927  | 2         | 63.58     | 4.40E-07   | GPSGVVSAQAQLGR | Phospho (ST) | 0.0000001000000.0 |
| GPSGXVSAQLXR 5 3 5 0 1071_1070  | 1        | 712.8687   | 1423.7229  | 2         | 63.46     | 4.50E-07   | GPSGLVSAQAQLR  | Phospho (ST) | 0.0000001000000.0 |
| GPSGXVSAQLXR 5 4 5 0 1091_1090  | 1        | 667.8449   | 1333.6753  | 2         | 63.41     | 4.60E-07   | GPSGLVSAQAQLLR | Phospho (ST) | 0.0000001000000.0 |
| GPSGXVSAQLXR 4 5 4 0 909_908    | 1        | 639.8138   | 1277.6131  | 2         | 63.34     | 4.60E-07   | GPSGGVSLAQLGR  | Phospho (ST) | 0.0000001000000.0 |
| GPSGXVSAQLXR 3 3 6 0 673_672    | 1        | 716.8315   | 1431.6484  | 2         | 63.11     | 4.90E-07   | GPSGFVSAQAQLSR | Phospho (ST) | 0.0000001000000.0 |
| GPSGXVSAQLXR 3 3 1 1 664_663    | 1        | 716.8315   | 1431.6484  | 2         | 63.11     | 4.90E-07   | GPSGFVSAQAQLDK | Phospho (ST) | 0.0000001000000.0 |
| GPSGXVSAQLXR 2 7 8 0 557_556    | 1        | 690.8287   | 1379.6429  | 2         | 63.08     | 4.90E-07   | GPSGEVSTAQLVR  | Phospho (ST) | 0.0000001000000.0 |
| GPSGXVSAQLXR 9 5 5 0 1911_1910  | 1        | 720.8658   | 1439.7171  | 2         | 63.03     | 5.00E-07   | GPSGVVSAQAQLLR | Phospho (ST) | 0.0000001000000.0 |
| GPSGXVSAQLXR 6 8 8 1 1378_1377  | 1        | 654.8318   | 1307.649   | 2         | 63.03     | 5.00E-07   | GPSGSVSAQLVK   | Phospho (ST) | 0.0000001000000.0 |
| GPSGXVSAQLXR 5 5 6 0 1131_1130  | 1        | 682.8473   | 1363.68    | 2         | 62.99     | 5.00E-07   | GPSGLVSSAQLLR  | Phospho (ST) | 0.0000001000000.0 |
| SXPFKXSPLXFRG 5 5 2 0 1105_1104 | 1        | 524.2725   | 1569.7956  | 3         | 62.97     | 5.00E-07   | SLPFKLSPLFGR   | Phospho (ST) | 0.0000001000000.0 |
| GPSGXVSAQLXR 2 0 2 0 405_404    | 1        | 690.8113   | 1379.6081  | 2         | 62.96     | 5.10E-07   | GPSGEVSAQAQLER | Phospho (ST) | 0.0000001000000.0 |
| GPSGXVSAQLXR 2 6 0 0 521_520    | 1        | 669.8049   | 1337.5953  | 2         | 62.82     | 5.20E-07   | GPSGEVSSAQLAR  | Phospho (ST) | 0.0000001000000.0 |
| GPSGXVSAQLXR 0 5 5 0 111_110    | 1        | 674.8527   | 1347.6908  | 2         | 62.62     | 5.50E-07   | GPSGAVSLAQLLR  | Phospho (ST) | 0.0000001000000.0 |
| GPSGXVSAQLXR 3 3 8 0 677_676    | 1        | 722.8527   | 1443.6908  | 2         | 62.59     | 5.50E-07   | GPSGFVSAQAQLVR | Phospho (ST) | 0.0000001000000.0 |
| SXPFKXSPLXFRG 0 5 5 0 111_110   | 1        | 504.9374   | 1511.7905  | 3         | 62.47     | 5.70E-07   | SAPFKLSPLFGR   | Phospho (ST) | 0.0000001000000.0 |
| GPSGXVSAQLXR 2 8 2 0 565_564    | 1        | 704.8264   | 1407.6382  | 2         | 62.43     | 5.70E-07   | GPSGEVSAQAQLER | Phospho (ST) | 0.0000001000000.0 |
| GPSGXVSAQLXR 8 1 5 0 1631_1630  | 1        | 689.8387   | 1377.6629  | 2         | 62.3      | 5.90E-07   | GPSGVVSDAQLLR  | Phospho (ST) | 0.0000001000000.0 |
| GPSGXVSAQLXR 0 4 9 0 99_98      | 1        | 671.8113   | 1341.6081  | 2         | 61.87     | 6.50E-07   | GPSGAVSQAQLYR  | Phospho (ST) | 0.0000001000000.0 |
| GPSGXVSAQLXR 1 1 2 0 225_224    | 1        | 705.7982   | 1409.5818  | 2         | 61.75     | 6.70E-07   | GPSGDVSDAQLER  | Phospho (ST) | 0.0000001000000.0 |
| GPSGXVSAQLXR 0 0 0 0 1_0        | 1        | 632.806    | 1263.5975  | 2         | 61.75     | 6.70E-07   | GPSGAVSQAQLAR  | Phospho (ST) | 0.0000001000000.0 |
| GPSGXVSAQLXR 1 1 9 0 239_238    | 1        | 722.8089   | 1443.6032  | 2         | 61.53     | 7.00E-07   | GPSGDVSDAQLYR  | Phospho (ST) | 0.0000001000000.0 |
| GPSGXVSAQLXR 0 1 5 0 31_30      | 1        | 675.8217   | 1349.6289  | 2         | 61.49     | 7.10E-07   | GPSGAVSQAQLTR  | Phospho (ST) | 0.0000001000000.0 |
| GPSGXVSAQLXR 5 5 7 0 1115_1114  | 1        | 689.8577   | 1377.7008  | 2         | 60.89     | 8.10E-07   | GPSGLVSLAQLTR  | Phospho (ST) | 0.0000001000000.0 |
| GPSGXVSAQLXR 9 6 3 1 1928_1927  | 1        | 710.8292   | 1419.6438  | 2         | 60.83     | 8.30E-07   | GPSGVVSSAQLFK  | Phospho (ST) | 0.0000001000000.0 |
| SXPFKXSPLXFRG 6 5 5 0 1312_1311 | 1        | 500.9336   | 1499.7789  | 3         | 60.7      | 8.50E-07   | SSPFKLSPLFGR   | Phospho (ST) | 0.0000001000000.0 |
| GPSGXVSAQLXR 5 0 8 1 1018_1017  | 1        | 653.8419   | 1305.6693  | 2         | 60.66     | 9.00E-07   | GPSGLVSAQAQLVK | Phospho (ST) | 0.0000001000000.0 |
| SXPFKXSPLXFRG 6 3 5 0 1271_1270 | 1        | 521.5966   | 1561.768   | 3         | 60.42     | 9.10E-07   | SSPFKLSPLFGR   | Phospho (ST) | 0.0000001000000.0 |
| GPSGXVSAQLXR 5 3 2 0 1065_1064  | 1        | 720.8473   | 1439.68    | 2         | 60.23     | 9.50E-07   | GPSGLVSAQAQLR  | Phospho (ST) | 0.0000001000000.0 |
| GPSGXVSAQLXR 9 6 9 1 1940_1939  | 1        | 718.8262   | 1435.6378  | 2         | 60        | 1.00E-06   | GPSGVVSSAQLYK  | Phospho (ST) | 0.0000001000000.0 |
| SXPFKXSPLXFRG 5 3 5 1 1072_1071 | 1        | 520.9457   | 1559.8154  | 3         | 59.9      | 1.00E-06   | SLPFKLSPLFGR   | Phospho (ST) | 0.0000001000000.0 |
| GPSGXVSAQLXR 2 1 2 0 425_424    | 1        | 712.8058   | 1423.597   | 2         | 59.1      | 1.20E-06   | GPSGEVSDAQLER  | Phospho (ST) | 0.0000001000000.0 |
| GPSGXVSAQLXR 5 0 9 0 1019_1018  | 1        | 699.8427   | 1397.6709  | 2         | 59.08     | 1.20E-06   | GPSGLVSAQAQLYR | Phospho (ST) | 0.0000001000000.0 |
| GPSGXVSAQLXR 5 5 8 0 1117_1116  | 1        | 688.8684   | 1375.7223  | 2         | 59.04     | 1.20E-06   | GPSGLVSLAQLVR  | Phospho (ST) | 0.0000001000000.0 |
| SXPFKXSPLXFRG 0 0 0 1 2_1       | 1        | 467.5717   | 1399.6931  | 3         | 59.02     | 1.30E-06   | SAPFKASPLAFGK  | Phospho (ST) | 0.0000001000000.0 |
| SXPFKXSPLXFRG 4 5 5 0 911_910   | 1        | 749.8951   | 1497.7756  | 2         | 58.93     | 1.30E-06   | SGPFKLSPLFGR   | Phospho (ST) | 0.0000001000000.0 |
| GPSGXVSAQLXR 2 2 8 0 457_456    | 1        | 704.8271   | 1407.6396  | 2         | 58.79     | 1.30E-06   | GPSGEVSEAQLVR  | Phospho (ST) | 0.0000001000000.0 |
| SXPFKXSPLXFRG 4 9 4 1 990_989   | 1        | 488.9022   | 1463.6847  | 3         | 58.65     | 1.40E-06   | SGPFKYSPLFGR   | Phospho (ST) | 0.0000001000000.0 |
| SXPFKXSPLXFRG 5 8 8 1 1178_1177 | 1        | 500.2738   | 1497.7997  | 3         | 58.65     | 1.40E-06   | SLPFKYSPLFGR   | Phospho (ST) | 0.0000001000000.0 |
| GPSGXVSAQLXR 2 2 2 0 445_444    | 1        | 719.814    | 1437.6135  | 2         | 58.63     | 1.40E-06   | GPSGEVSEAQLER  | Phospho (ST) | 0.0000001000000.0 |
| GPSGXVSAQLXR 3 9 3 0 787_786    | 1        | 754.8499   | 1507.6852  | 2         | 58.31     | 1.50E-06   | GPSGFVSAQAQLFR | Phospho (ST) | 0.0000001000000.0 |
| GPSGXVSAQLXR 2 3 5 0 471_470    | 1        | 720.8478   | 1439.6811  | 2         | 58.26     | 1.50E-06   | GPSGEVSAQAQLLR | Phospho (ST) | 0.0000001000000.0 |
| SXPFKXSPLXFRG 6 3 9 1 1280_1279 | 1        | 528.9213   | 1583.742   | 3         | 58.17     | 1.50E-06   | SSPFKLSPLFGR   | Phospho (ST) | 0.0000001000000.0 |
| SXPFKXSPLXFRG 6 5 0 1 1302_1301 | 1        | 486.9181   | 1457.7324  | 3         | 58.12     | 1.50E-06   | SSPFKLSPLAFGK  | Phospho (ST) | 0.0000001000000.0 |
| SXPFKXSPLXFRG 5 9 5 0 1191_1190 | 1        | 535.6132   | 1603.8176  | 3         | 57.83     | 1.60E-06   | SLPFKYSPLFGR   | Phospho (ST) | 0.0000001000000.0 |
| SXPFKXSPLXFRG 0 6 0 1 122_121   | 1        | 472.9023   | 1415.6852  | 3         | 57.67     | 1.70E-06   | SAPFKSPLAFGK   | Phospho (ST) | 0.0000001000000.0 |
| SXPFKXSPLXFRG 4 5 3 0 907_906   | 1        | 511.5936   | 1531.759   | 3         | 57.66     | 1.70E-06   | SGPFKLSPLFGR   | Phospho (ST) | 0.0000001000000.0 |
| SXPFKXSPLXFRG 5 5 5 1 1112_1111 | 1        | 509.6177   | 1525.8312  | 3         | 57.61     | 1.70E-06   | SLPFKLSPLFGR   | Phospho (ST) | 0.0000001000000.0 |
| GPSGXVSAQLXR 3 3 5 0 671_670    | 1        | 729.8602   | 1457.7058  | 2         | 57.26     | 1.90E-06   | GPSGFVSAQAQLLR | Phospho (ST) | 0.0000001000000.0 |
| GPSGXVSAQLXR 5 6 1 0 1123_1122  | 1        | 683.8207   | 1365.6269  | 2         | 57.15     | 1.90E-06   | GPSGLVSSAQLDR  | Phospho (ST) | 0.0000001000000.0 |
| GPSGXVSAQLXR 3 5 5 0 711_710    | 1        | 475.5812   | 1423.7219  | 3         | 57.08     | 2.00E-06   | GPSGFVSLAQLLR  | Phospho (ST) | 0.0000001000000.0 |
| GPSGXVSAQLXR 0 2 9 0 59_58      | 1        | 707.8217   | 1413.6289  | 2         | 56.94     | 2.00E-06   | GPSGAVSEAQLYR  | Phospho (ST) | 0.0000001000000.0 |
| GPSGXVSAQLXR 8 4 5 1 1692_1691  | 1        | 646.8347   | 1291.6549  | 2         | 56.54     | 2.70E-06   | GPSGVVSAQAQLLR | Phospho (ST) | 0.0000001000000.0 |
| GPSGXVSAQLXR 3 3 3 0 667_666    | 1        | 746.8522   | 1491.6898  | 2         | 56.42     | 2.30E-06   | GPSGFVSAQAQLFR | Phospho (ST) | 0.0000001000000.0 |
| SXPFKXSPLXFRG 4 8 9 1 980_979   | 1        | 502.9187   | 1505.7342  | 3         | 56.42     | 2.30E-06   | SGPFKYSPLFGR   | Phospho (ST) | 0.0000001000000.0 |
| SXPFKXSPLXFRG 3 3 3 0 667_666   | 1        | 552.9372   | 1655.7898  | 3         | 56.4      | 2.30E-06   | SFPFKSPLFGR    | Phospho (ST) | 0.0000001000000.0 |
| SXPFKXSPLXFRG 4 5 0 0 901_900   | 1        | 728.8707   | 1455.7269  | 2         | 56.2      | 2.40E-06   | SGPFKLSPLAFGR  | Phospho (ST) | 0.0000001000000.0 |

|                                 |   |          |           |   |       |          |               |              |                   |
|---------------------------------|---|----------|-----------|---|-------|----------|---------------|--------------|-------------------|
| GPSGXVSAQXLXR 2 5 5 0 511_510   | 1 | 703.8558 | 1405.6971 | 2 | 55.83 | 2.60E-06 | GPSGEVSLAQLLR | Phospho (ST) | 0.0000001000000.0 |
| SXPFKXSPLXFRG 4 5 2 1 906_905   | 1 | 496.2497 | 1485.7272 | 3 | 55.78 | 2.60E-06 | SGPFKLSPLFEGK | Phospho (ST) | 0.0000001000000.0 |
| SXPFKXSPLXFRG 0 5 0 1 102_101   | 1 | 481.5865 | 1441.7376 | 3 | 55.68 | 2.70E-06 | SAPFKLSPLAFGK | Phospho (ST) | 0.0000001000000.0 |
| GPSGXVSAQXLXR 5 6 2 1 1126_1125 | 1 | 676.8275 | 1351.6404 | 2 | 55.61 | 2.70E-06 | GPSGLVSSAQLEK | Phospho (ST) | 0.0000001000000.0 |
| SXPFKXSPLXFRG 2 5 0 1 502_501   | 1 | 500.9215 | 1499.7427 | 3 | 55.13 | 3.10E-06 | SEPFKLSPLAFGK | Phospho (ST) | 0.0000001000000.0 |
| SXPFKXSPLXFRG 4 2 5 0 851_850   | 1 | 505.5849 | 1513.733  | 3 | 54.9  | 3.20E-06 | SGPFKESPLLFGR | Phospho (ST) | 0.0000001000000.0 |
| GPSGXVSAQXLXR 2 1 9 0 439_438   | 1 | 729.8164 | 1457.6183 | 2 | 54.78 | 3.30E-06 | GPSGEVSDAQLYR | Phospho (ST) | 0.0000001000000.0 |
| GPSGXVSAQXLXR 9 3 4 0 1869_1868 | 1 | 709.827  | 1417.6395 | 2 | 54.77 | 3.30E-06 | GPSGVVSAQQLGR | Phospho (ST) | 0.0000001000000.0 |
| SXPFKXSPLXFRG 8 5 9 0 1719_1718 | 1 | 530.9414 | 1589.8024 | 3 | 54.57 | 3.50E-06 | SVPFKLSPLYFGR | Phospho (ST) | 0.0000001000000.0 |
| GPSGXVSAQXLXR 5 0 4 1 1010_1009 | 1 | 632.8184 | 1263.6223 | 2 | 54.45 | 3.60E-06 | GPSGLVSAQQLGK | Phospho (ST) | 0.0000001000000.0 |
| GPSGXVSAQXLXR 9 4 1 0 1883_1882 | 1 | 693.8062 | 1385.5979 | 2 | 54.43 | 3.60E-06 | GPSGVVSGAQLDR | Phospho (ST) | 0.0000001000000.0 |
| SXPFKXSPLXFRG 0 5 3 1 108_107   | 1 | 506.9303 | 1517.7691 | 3 | 54.32 | 3.70E-06 | SAPFKLSPLFFGK | Phospho (ST) | 0.0000001000000.0 |
| SXPFKXSPLXFRG 1 3 5 0 271_270   | 1 | 530.9287 | 1589.7641 | 3 | 54.24 | 3.80E-06 | SDPFKFSPLLFGR | Phospho (ST) | 0.0000001000000.0 |
| GPSGXVSAQXLXR 5 1 7 0 1035_1034 | 1 | 690.8281 | 1379.6417 | 2 | 54.11 | 3.90E-06 | GPSGLVSDAQLTR | Phospho (ST) | 0.0000001000000.0 |
| GPSGXVSAQXLXR 1 8 7 0 375_374   | 1 | 683.8218 | 1365.629  | 2 | 54.03 | 4.00E-06 | GPSGDVSAQQLTR | Phospho (ST) | 0.0000001000000.0 |
| GPSGXVSAQXLXR 0 2 4 0 49_48     | 1 | 654.8008 | 1307.5871 | 2 | 54    | 4.00E-06 | GPSGAVSEAQLGR | Phospho (ST) | 0.0000001000000.0 |
| GPSGXVSAQXLXR 5 0 5 1 1012_1011 | 1 | 660.8499 | 1319.6852 | 2 | 53.82 | 4.10E-06 | GPSGLVSAQQLK  | Phospho (ST) | 0.0000001000000.0 |
| SXPFKXSPLXFRG 5 3 5 0 1071_1070 | 1 | 530.2785 | 1587.8137 | 3 | 53.71 | 4.30E-06 | SLPFKFSPLFGR  | Phospho (ST) | 0.0000001000000.0 |
| GPSGXVSAQXLXR 6 6 6 1 1334_1333 | 1 | 642.7951 | 1283.5757 | 2 | 53.57 | 4.40E-06 | GPSGSVSSAQLSK | Phospho (ST) | 0.0000001000000.0 |
| GPSGXVSAQXLXR 8 5 5 1 1712_1711 | 1 | 674.866  | 1347.7174 | 2 | 53.45 | 4.50E-06 | GPSGVVSLAQLLK | Phospho (ST) | 0.0000001000000.0 |
| SXPFKXSPLXFRG 8 5 1 0 1703_1702 | 1 | 514.929  | 1541.765  | 3 | 53.25 | 4.70E-06 | SVPFKLSPLDFGR | Phospho (ST) | 0.0000001000000.0 |
| GPSGXVSAQXLXR 0 1 4 0 29_28     | 1 | 647.7932 | 1293.5718 | 2 | 53.17 | 4.80E-06 | GPSGAVSDAQLGR | Phospho (ST) | 0.0000001000000.0 |
| SXPFKXSPLXFRG 3 5 8 1 718_717   | 1 | 516.2745 | 1545.8018 | 3 | 53.17 | 4.80E-06 | SFPFKLSPLVFGK | Phospho (ST) | 0.0000001000000.0 |
| GPSGXVSAQXLXR 0 9 0 1 182_181   | 1 | 664.8157 | 1327.6169 | 2 | 53.14 | 4.90E-06 | GPSGAVSQAQLAK | Phospho (ST) | 0.0000001000000.0 |
| GPSGXVSAQXLXR 6 5 3 1 1308_1307 | 1 | 685.8395 | 1369.6644 | 2 | 53.1  | 4.90E-06 | GPSGSVSLAQLFK | Phospho (ST) | 0.0000001000000.0 |
| SXPFKXSPLXFRG 4 0 9 0 819_818   | 1 | 502.9094 | 1505.7064 | 3 | 52.99 | 5.00E-06 | SGPFKASPLYFGR | Phospho (ST) | 0.0000001000000.0 |
| GPSGXVSAQXLXR 9 5 8 0 1917_1916 | 1 | 713.8577 | 1425.7008 | 2 | 52.67 | 5.40E-06 | GPSGVVSLAQLVR | Phospho (ST) | 0.0000001000000.0 |
| GPSGXVSAQXLXR 5 0 1 1 1004_1003 | 1 | 661.8212 | 1321.6279 | 2 | 52.58 | 5.50E-06 | GPSGLVSAQQLDK | Phospho (ST) | 0.0000001000000.0 |
| SXPFKXSPLXFRG 2 0 9 0 419_418   | 1 | 526.9165 | 1577.7277 | 3 | 52.56 | 5.50E-06 | SEPFKASPLYFGR | Phospho (ST) | 0.0000001000000.0 |
| GPSGXVSAQXLXR 6 1 6 1 1234_1233 | 1 | 656.7925 | 1311.5704 | 2 | 52.54 | 5.60E-06 | GPSGSVSDAQLSK | Phospho (ST) | 0.0000001000000.0 |
| GPSGXVSAQXLXR 6 4 4 1 1290_1289 | 1 | 612.7846 | 1223.5547 | 2 | 52.13 | 6.10E-06 | GPSGSVSGAQLGK | Phospho (ST) | 0.0000001000000.0 |
| SXPFKXSPLXFRG 4 5 4 1 910_909   | 1 | 472.2426 | 1413.7061 | 3 | 51.96 | 6.40E-06 | SGPFKLSPLGFGK | Phospho (ST) | 0.0000001000000.0 |
| SXPFKXSPLXFRG 0 6 4 1 130_129   | 1 | 468.2303 | 1401.669  | 3 | 51.95 | 6.40E-06 | SAPFKSSPLGFGK | Phospho (ST) | 0.0000001000000.0 |
| SXPFKXSPLXFRG 5 8 8 0 1177_1176 | 1 | 509.6092 | 1525.8057 | 3 | 51.85 | 6.50E-06 | SLPFKVSPLVFGK | Phospho (ST) | 0.0000001000000.0 |
| SXPFKXSPLXFRG 2 5 0 0 501_500   | 1 | 510.2566 | 1527.7479 | 3 | 51.8  | 6.60E-06 | SEPFKLSPLAFGR | Phospho (ST) | 0.0000001000000.0 |
| SXPFKXSPLXFRG 5 5 6 0 1113_1112 | 1 | 510.2687 | 1527.7843 | 3 | 51.76 | 6.70E-06 | SLPFKLSPLSFGK | Phospho (ST) | 0.0000001000000.0 |
| GPSGXVSAQXLXR 5 8 4 1 1170_1169 | 1 | 646.8342 | 1291.6538 | 2 | 51.5  | 8.50E-06 | GPSGLVSAQQLGK | Phospho (ST) | 0.0000001000000.0 |
| GPSGXVSAQXLXR 5 8 6 1 1174_1173 | 1 | 661.8394 | 1321.6643 | 2 | 51.48 | 7.10E-06 | GPSGLVSAQQLSK | Phospho (ST) | 0.0000001000000.0 |
| GPSGXVSAQXLXR 9 8 3 1 1968_1967 | 1 | 716.8476 | 1431.6806 | 2 | 51.47 | 7.10E-06 | GPSGVVSAQQLFK | Phospho (ST) | 0.0000001000000.0 |
| GPSGXVSAQXLXR 4 5 5 1 912_911   | 1 | 653.8419 | 1305.6693 | 2 | 51.42 | 7.60E-06 | GPSGGVSLAQLLK | Phospho (ST) | 0.0000001000000.0 |
| GPSGXVSAQXLXR 8 5 8 1 1718_1717 | 1 | 667.8574 | 1333.7002 | 2 | 51.4  | 7.20E-06 | GPSGVVSLAQLVK | Phospho (ST) | 0.0000001000000.0 |
| SXPFKXSPLXFRG 4 0 0 0 801_800   | 1 | 472.2338 | 1413.6795 | 3 | 51.31 | 7.40E-06 | SGPFKASPLAFGR | Phospho (ST) | 0.0000001000000.0 |
| GPSGXVSAQXLXR 2 8 3 1 568_567   | 1 | 699.838  | 1397.6614 | 2 | 51.29 | 7.40E-06 | GPSGEVSAQQLFK | Phospho (ST) | 0.0000001000000.0 |
| GPSGXVSAQXLXR 3 2 0 1 642_641   | 1 | 685.8217 | 1369.6288 | 2 | 51.24 | 7.50E-06 | GPSGVVSEAQLAK | Phospho (ST) | 0.0000001000000.0 |
| GPSGXVSAQXLXR 4 3 3 1 868_867   | 1 | 687.8262 | 1373.6379 | 2 | 51.2  | 7.60E-06 | GPSGGVSAQQLFK | Phospho (ST) | 0.0000001000000.0 |
| GPSGXVSAQXLXR 5 1 5 1 1032_1031 | 1 | 682.8445 | 1363.6744 | 2 | 51.09 | 7.80E-06 | GPSGLVSDAQLLK | Phospho (ST) | 0.0000001000000.0 |
| GPSGXVSAQXLXR 5 0 0 1 1002_1001 | 1 | 639.8261 | 1277.6377 | 2 | 50.96 | 8.00E-06 | GPSGLVSAQQLAK | Phospho (ST) | 0.0000001000000.0 |
| GPSGXVSAQXLXR 4 5 8 1 918_917   | 1 | 646.8343 | 1291.654  | 2 | 50.89 | 9.80E-06 | GPSGGVSLAQLVK | Phospho (ST) | 0.0000001000000.0 |
| GPSGXVSAQXLXR 0 5 5 1 112_111   | 1 | 660.8495 | 1319.6844 | 2 | 50.87 | 8.20E-06 | GPSGAVSLAQLLK | Phospho (ST) | 0.0000001000000.0 |
| GPSGXVSAQXLXR 3 0 2 0 605_604   | 1 | 699.8238 | 1397.633  | 2 | 50.86 | 8.20E-06 | GPSGVVSAQQLER | Phospho (ST) | 0.0000001000000.0 |
| GPSGXVSAQXLXR 2 3 8 1 478_477   | 1 | 699.8375 | 1397.6605 | 2 | 50.68 | 8.60E-06 | GPSGEVSAQQLVK | Phospho (ST) | 0.0000001000000.0 |
| SXPFKXSPLXFRG 5 5 1 0 1103_1102 | 1 | 519.6005 | 1555.7797 | 3 | 50.5  | 8.90E-06 | SLPFKLSPLDFGR | Phospho (ST) | 0.0000001000000.0 |
| SXPFKXSPLXFRG 9 5 3 1 1908_1907 | 1 | 537.6061 | 1609.7966 | 3 | 50.35 | 9.20E-06 | SVPFKLSPLFFGK | Phospho (ST) | 0.0000001000000.0 |
| GPSGXVSAQXLXR 3 0 0 0 601_600   | 1 | 670.8209 | 1339.6273 | 2 | 50.27 | 9.40E-06 | GPSGVVSAQQLAR | Phospho (ST) | 0.0000001000000.0 |
| GPSGXVSAQXLXR 0 4 0 1 82_81     | 1 | 611.7953 | 1221.5761 | 2 | 50.24 | 9.50E-06 | GPSGAVSQAQLAK | Phospho (ST) | 0.0000001000000.0 |
| SXPFKXSPLXFRG 0 0 8 0 17_16     | 1 | 486.2496 | 1455.727  | 3 | 50.12 | 9.70E-06 | SAPFKASPLVFGK | Phospho (ST) | 0.0000001000000.0 |
| GPSGXVSAQXLXR 5 5 5 1 1112_1111 | 1 | 681.8735 | 1361.7325 | 2 | 50.12 | 9.70E-06 | GPSGLVSLAQLLK | Phospho (ST) | 0.0000001000000.0 |
| SXPFKXSPLXFRG 6 5 2 0 1305_1304 | 1 | 515.5885 | 1543.7437 | 3 | 50.06 | 9.90E-06 | SSPFKLSPLFEGK | Phospho (ST) | 0.0000001000000.0 |
| GPSGXVSAQXLXR 3 4 6 0 693_692   | 1 | 671.8094 | 1341.6042 | 2 | 49.56 | 1.10E-05 | GPSGVVSGAQLSR | Phospho (ST) | 0.0000001000000.0 |
| GPSGXVSAQXLXR 5 2 8 1 1058_1057 | 1 | 682.8471 | 1363.6797 | 2 | 49.5  | 1.30E-05 | GPSGLVSAQQLVK | Phospho (ST) | 0.0000001000000.0 |
| GPSGXVSAQXLXR 9 0 0 0 1801_1800 | 1 | 678.8187 | 1355.6228 | 2 | 49.42 | 1.10E-05 | GPSGVVSAQQLAR | Phospho (ST) | 0.0000001000000.0 |
| GPSGXVSAQXLXR 3 4 5 0 691_690   | 1 | 684.8373 | 1367.6601 | 2 | 49.25 | 1.20E-05 | GPSGVVSGAQLLR | Phospho (ST) | 0.0000001000000.0 |
| SXPFKXSPLXFRG 0 3 8 1 78_77     | 1 | 502.2584 | 1503.7533 | 3 | 49.24 | 1.20E-05 | SAPFKFSPLVFGK | Phospho (ST) | 0.0000001000000.0 |
| SXPFKXSPLXFRG 7 8 0 1 1562_1561 | 1 | 486.9181 | 1457.7324 | 3 | 49.21 | 1.20E-05 | STPFKVSPLAFGK | Phospho (ST) | 0.0000001000000.0 |
| GPSGXVSAQXLXR 0 5 8 1 118_117   | 1 | 653.8422 | 1305.6699 | 2 | 49.17 | 1.30E-05 | GPSGAVSQAQLVK | Phospho (ST) | 0.0000001000000.0 |
| GPSGXVSAQXLXR 6 4 1 0 1283_1282 | 1 | 655.7889 | 1309.5632 | 2 | 49.08 | 1.20E-05 | GPSGSVSGAQLDR | Phospho (ST) | 0.0000001000000.0 |
| GPSGXVSAQXLXR 0 5 2 1 106_105   | 1 | 668.8307 | 1335.6469 | 2 | 49.02 | 1.30E-05 | GPSGAVSQAQLFK | Phospho (ST) | 0.0000001000000.0 |
| GPSGXVSAQXLXR 9 4 6 1 1894_1893 | 1 | 665.8062 | 1329.5978 | 2 | 48.93 | 1.30E-05 | GPSGVVSGAQLSK | Phospho (ST) | 0.0000001000000.0 |
| GPSGXVSAQXLXR 2 7 5 0 551_550   | 1 | 697.8377 | 1393.6609 | 2 | 48.81 | 1.30E-05 | GPSGEVSTAQLLR | Phospho (ST) | 0.0000001000000.0 |
| GPSGXVSAQXLXR 0 7 8 1 158_157   | 1 | 647.8242 | 1293.6339 | 2 | 48.8  | 1.30E-05 | GPSGAVSTAQLVK | Phospho (ST) | 0.0000001000000.0 |
| GPSGXVSAQXLXR 4 7 8 0 957_956   | 1 | 654.8182 | 1307.6219 | 2 | 48.79 | 1.30E-05 | GPSGGVSTAQLVR | Phospho (ST) | 0.0000001000000.0 |
| GPSGXVSAQXLXR 8 8 9 0 1779_1778 | 1 | 706.8516 | 1411.6887 | 2 | 48.69 | 1.40E-05 | GPSGVVSAQQLYR | Phospho (ST) | 0.0000001000000.0 |
| GPSGXVSAQXLXR 5 3 9 0 1079_1078 | 1 | 737.8573 | 1473.7    | 2 | 48.65 | 1.40E-05 | GPSGLVSAQQLYR | Phospho (ST) | 0.0000001000000.0 |
| GPSGXVSAQXLXR 9 6 4 0 1929_1928 | 1 | 679.8065 | 1357.5985 | 2 | 48.55 | 1.40E-05 | GPSGVVSSAQLGR | Phospho (ST) | 0.0000001000000.0 |
| GPSGXVSAQXLXR 6 8 5 1 1372_1371 | 1 | 661.839  | 1321.6635 | 2 | 48.54 | 1.40E-05 | GPSGSVSAQQLK  | Phospho (ST) | 0.0000001000000.0 |
| GPSGXVSAQXLXR 0 4 4 0 89_88     | 1 | 618.7905 | 1235.5665 | 2 | 48.47 | 1.40E-05 | GPSGAVSQAQLGR | Phospho (ST) | 0.0000001000000.0 |
| GPSGXVSAQXLXR 5 8 9 0 1179_1178 | 1 | 713.8579 | 1425.7013 | 2 | 48.45 | 1.40E-05 | GPSGLVSAQQLYR | Phospho (ST) | 0.0000001000000.0 |
| GPSGXVSAQXLXR 6 4 1 1 1284_1283 | 1 | 641.7877 | 1281.5609 | 2 | 48.42 | 1.40E-05 | GPSGSVSGAQLDK | Phospho (ST) | 0.0000001000000.0 |
| GPSGXVSAQXLXR 6 0 6 1 1214_1213 | 1 | 634.7977 | 1267.5809 | 2 | 48.2  | 1.50E-05 | GPSGSVSAQQLSK | Phospho (ST) | 0.0000001000000.0 |
| GPSGXVSAQXLXR 1 5 3 1 308_307   | 1 | 699.8368 | 1397.659  | 2 | 48.18 | 1.50E-05 | GPSGDVSLAQLFK | Phospho (ST) | 0.0000001000000.0 |
| GPSGXVSAQXLXR 8 0 0 1 1602_1601 | 1 | 632.8196 | 1263.6246 | 2 | 48.05 | 1.60E-05 | GPSGVVSAQQLAK | Phospho (ST) | 0.0000001000000.0 |
| GPSGXVSAQXLXR 4 5 3 1 908_907   | 1 | 670.8344 | 1339.6543 | 2 | 47.76 | 1.70E-05 | GPSGGVSLAQLFK | Phospho (ST) | 0.0000001000000.0 |
| GPSGXVSAQXLXR 5 3 5 1 1072_1071 | 1 | 698.8654 | 1395.7162 | 2 | 47.67 | 1.70E-05 | GPSGLVSAQQLLK | Phospho (ST) | 0.0000001000000.0 |
| SXPFKXSPLXFRG 2 4 7 0 495_494   | 1 | 501.5713 | 1501.6919 | 3 | 47.63 | 2.30E-05 | SEPFKGSPLTFGR | Phospho (ST) | 0.0000001000000.0 |
| GPSGXVSAQXLXR 3 8 9 0 779_778   | 1 | 730.8503 | 1459.6861 | 2 | 47.5  | 1.80E-05 | GPSGVVSAQQLYR | Phospho (ST) | 0.0000001000000.0 |
| SXPFKXSPLXFRG 9 0 4 1 1810_1809 | 1 | 493.574  | 1477.7001 | 3 | 47.46 | 1.80E-05 | SVPFKASPLGFGK | Phospho (ST) | 0.0000001000000.0 |

|                                 |   |          |           |   |       |          |                |              |                   |
|---------------------------------|---|----------|-----------|---|-------|----------|----------------|--------------|-------------------|
| SXPFKXSPLXFRG 5 6 2 1 1126_1125 | 1 | 506.2537 | 1515.7392 | 3 | 47.46 | 1.80E-05 | SLPFKSSPLEFGK  | Phospho (ST) | 0.0000001000000.0 |
| GPSGXVSAQQLXR 8 3 3 1 1668_1667 | 1 | 708.8492 | 1415.6838 | 2 | 47.44 | 1.80E-05 | GPSGVVSAQLFK   | Phospho (ST) | 0.0000001000000.0 |
| GPSGXVSAQQLXR 9 4 4 1 1890_1889 | 1 | 650.8005 | 1299.5864 | 2 | 47.4  | 1.80E-05 | GPSGVVSAQQLGK  | Phospho (ST) | 0.0000001000000.0 |
| GPSGXVSAQQLXR 4 6 5 0 931_930   | 1 | 654.8175 | 1307.6205 | 2 | 47.39 | 1.80E-05 | GPSGVVSAQQLGK  | Phospho (ST) | 0.0000001000000.0 |
| SXPFKXSPLXFRG 3 8 3 1 768_767   | 1 | 527.6044 | 1579.7913 | 3 | 47.31 | 1.90E-05 | SFPFKVSPPLFFGK | Phospho (ST) | 0.0000001000000.0 |
| GPSGXVSAQQLXR 8 8 8 1 1778_1777 | 1 | 660.8498 | 1319.685  | 2 | 47.15 | 1.90E-05 | GPSGVVSAQQLVK  | Phospho (ST) | 0.0000001000000.0 |
| SXPFKXSPLXFRG 4 3 8 1 878_877   | 1 | 497.5865 | 1489.7375 | 3 | 46.9  | 2.00E-05 | SGPFKFSPLVFGK  | Phospho (ST) | 0.0000001000000.0 |
| GPSGXVSAQQLXR 5 6 5 1 1132_1131 | 1 | 668.847  | 1335.6794 | 2 | 46.82 | 2.10E-05 | GPSGLVSAQQLK   | Phospho (ST) | 0.0000001000000.0 |
| GPSGXVSAQQLXR 2 4 1 0 483_482   | 1 | 676.7955 | 1351.5764 | 2 | 46.72 | 2.10E-05 | GPSGEVSAQQLDR  | Phospho (ST) | 0.0000001000000.0 |
| GPSGXVSAQQLXR 3 0 5 1 612_611   | 1 | 677.8419 | 1353.6692 | 2 | 46.4  | 2.30E-05 | GPSGFVSAQQLK   | Phospho (ST) | 0.0000001000000.0 |
| GPSGXVSAQQLXR 0 9 5 1 192_191   | 1 | 685.8394 | 1369.6643 | 2 | 46.39 | 2.30E-05 | GPSGAVSAQQLK   | Phospho (ST) | 0.0000001000000.0 |
| SXPFKXSPLXFRG 5 5 0 1 1102_1101 | 1 | 495.6021 | 1483.7843 | 3 | 46.14 | 2.40E-05 | SLPFKLSPLAFGK  | Phospho (ST) | 0.0000001000000.0 |
| GPSGXVSAQQLXR 3 3 5 1 672_671   | 1 | 715.8577 | 1429.7008 | 2 | 46.12 | 2.40E-05 | GPSGFVSAQQLK   | Phospho (ST) | 0.0000001000000.0 |
| SXPFKXSPLXFRG 6 4 2 1 1286_1285 | 1 | 487.5656 | 1459.675  | 3 | 46.07 | 2.50E-05 | SSPFKGSPLFFGK  | Phospho (ST) | 0.0000001000000.0 |
| GPSGXVSAQQLXR 1 5 3 0 307_306   | 1 | 713.839  | 1425.6634 | 2 | 45.92 | 2.60E-05 | GPSGDVSLAQLFR  | Phospho (ST) | 0.0000001000000.0 |
| GPSGXVSAQQLXR 1 5 5 0 311_310   | 1 | 696.8476 | 1391.6806 | 2 | 45.72 | 2.70E-05 | GPSGDVSLAQLLR  | Phospho (ST) | 0.0000001000000.0 |
| GPSGXVSAQQLXR 6 8 6 1 1374_1373 | 1 | 648.8134 | 1295.6123 | 2 | 45.71 | 2.70E-05 | GPSGSVSAQQLSK  | Phospho (ST) | 0.0000001000000.0 |
| GPSGXVSAQQLXR 3 4 9 1 700_699   | 1 | 695.8237 | 1389.6328 | 2 | 45.64 | 2.70E-05 | GPSGFVSAQQLYK  | Phospho (ST) | 0.0000001000000.0 |
| GPSGXVSAQQLXR 5 4 9 0 1099_1098 | 1 | 692.8359 | 1383.6572 | 2 | 45.62 | 2.70E-05 | GPSGLVSAQQLYR  | Phospho (ST) | 0.0000001000000.0 |
| SXPFKXSPLXFRG 3 0 8 0 617_616   | 1 | 511.5933 | 1531.758  | 3 | 45.6  | 2.80E-05 | SFPFKASPLVFGK  | Phospho (ST) | 0.0000001000000.0 |
| GPSGXVSAQQLXR 4 6 5 1 932_931   | 1 | 640.8158 | 1279.617  | 2 | 45.58 | 2.80E-05 | GPSGVVSAQQLK   | Phospho (ST) | 0.0000001000000.0 |
| SXPFKXSPLXFRG 9 9 3 0 1907_1906 | 1 | 546.9414 | 1637.8024 | 3 | 45.51 | 2.80E-05 | SYPFKLSPLFFGK  | Phospho (ST) | 0.0000001000000.0 |
| GPSGXVSAQQLXR 2 6 6 1 534_533   | 1 | 663.8002 | 1325.5858 | 2 | 45.48 | 2.80E-05 | GPSGEVSAQQLSK  | Phospho (ST) | 0.0000001000000.0 |
| GPSGXVSAQQLXR 1 6 1 1 324_323   | 1 | 670.79   | 1339.5654 | 2 | 45.46 | 2.80E-05 | GPSGDVSAQQLDK  | Phospho (ST) | 0.0000001000000.0 |
| SXPFKXSPLXFRG 6 3 9 0 1279_1278 | 1 | 538.2552 | 1611.7437 | 3 | 45.28 | 3.00E-05 | SSPFKFSPLVFGK  | Phospho (ST) | 0.0000001000000.0 |
| GPSGXVSAQQLXR 5 1 9 0 1039_1038 | 1 | 721.8398 | 1441.6651 | 2 | 45.27 | 3.00E-05 | GPSGLVDAQQLYR  | Phospho (ST) | 0.0000001000000.0 |
| GPSGXVSAQQLXR 8 6 4 1 1730_1729 | 1 | 633.8083 | 1265.6021 | 2 | 45.26 | 3.00E-05 | GPSGVVSAQQLGK  | Phospho (ST) | 0.0000001000000.0 |
| GPSGXVSAQQLXR 0 4 6 1 94_93     | 1 | 619.7925 | 1237.5705 | 2 | 45.24 | 3.00E-05 | GPSGAVSAQQLSK  | Phospho (ST) | 0.0000001000000.0 |
| SXPFKXSPLXFRG 3 3 5 0 671_670   | 1 | 541.6088 | 1621.8045 | 3 | 45.1  | 3.10E-05 | SFPFKFSPLFFGK  | Phospho (ST) | 0.0000001000000.0 |
| GPSGXVSAQQLXR 3 0 6 1 614_613   | 1 | 664.8156 | 1327.6167 | 2 | 44.99 | 3.20E-05 | GPSGFVSAQQLSK  | Phospho (ST) | 0.0000001000000.0 |
| GPSGXVSAQQLXR 0 4 4 1 90_89     | 1 | 604.787  | 1207.5595 | 2 | 44.75 | 3.30E-05 | GPSGAVSAQQLGK  | Phospho (ST) | 0.0000001000000.0 |
| SXPFKXSPLXFRG 9 9 3 0 1987_1986 | 1 | 844.8965 | 1687.7785 | 2 | 44.63 | 3.40E-05 | SYPFKLSPLFFGK  | Phospho (ST) | 0.0000001000000.0 |
| SXPFKXSPLXFRG 4 2 4 1 850_849   | 1 | 477.5626 | 1429.6659 | 3 | 44.55 | 3.50E-05 | SGPFKESPLGFGK  | Phospho (ST) | 0.0000001000000.0 |
| SXPFKXSPLXFRG 1 3 3 0 267_266   | 1 | 542.2563 | 1623.7472 | 3 | 44.51 | 3.50E-05 | SDPFKFSPLFFGK  | Phospho (ST) | 0.0000001000000.0 |
| SXPFKXSPLXFRG 0 9 0 0 181_180   | 1 | 760.8682 | 1519.7218 | 2 | 44.43 | 3.60E-05 | SAPFKYSPLAFGR  | Phospho (ST) | 0.0000001000000.0 |
| GPSGXVSAQQLXR 3 1 2 1 626_625   | 1 | 707.8174 | 1413.6202 | 2 | 44.43 | 3.60E-05 | GPSGFVDAQQLGK  | Phospho (ST) | 0.0000001000000.0 |
| GPSGXVSAQQLXR 2 3 5 1 472_471   | 1 | 706.8448 | 1411.675  | 2 | 44.42 | 3.60E-05 | GPSGEVSAQQLK   | Phospho (ST) | 0.0000001000000.0 |
| GPSGXVSAQQLXR 8 9 0 0 1781_1780 | 1 | 692.8333 | 1383.6521 | 2 | 44.36 | 3.70E-05 | GPSGVVSAQQLAR  | Phospho (ST) | 0.0000001000000.0 |
| SXPFKXSPLXFRG 4 3 5 1 872_871   | 1 | 502.2585 | 1503.7535 | 3 | 44.23 | 3.80E-05 | SGPFKFSPLFFGK  | Phospho (ST) | 0.0000001000000.0 |
| SXPFKXSPLXFRG 0 9 3 1 188_187   | 1 | 523.5898 | 1567.7475 | 3 | 44.18 | 3.80E-05 | SAPFKYSPLFFGK  | Phospho (ST) | 0.0000001000000.0 |
| GPSGXVSAQQLXR 1 1 1 1 224_223   | 1 | 684.7863 | 1367.558  | 2 | 44.08 | 3.90E-05 | GPSGDVDAQQLDK  | Phospho (ST) | 0.0000001000000.0 |
| GPSGXVSAQQLXR 5 3 4 0 1069_1068 | 1 | 684.8365 | 1367.6584 | 2 | 44.01 | 4.00E-05 | GPSGLVSAQQLGR  | Phospho (ST) | 0.0000001000000.0 |
| GPSGXVSAQQLXR 9 1 1 1 1824_1823 | 1 | 708.8074 | 1415.6002 | 2 | 43.99 | 4.00E-05 | GPSGVVDAQQLDK  | Phospho (ST) | 0.0000001000000.0 |
| GPSGXVSAQQLXR 8 2 6 1 1654_1653 | 1 | 669.8192 | 1337.6238 | 2 | 43.94 | 4.00E-05 | GPSGVVSEAQQLSK | Phospho (ST) | 0.0000001000000.0 |
| GPSGXVSAQQLXR 0 1 9 0 39_38     | 1 | 700.8138 | 1399.613  | 2 | 43.86 | 4.10E-05 | GPSGAVDAQQLYR  | Phospho (ST) | 0.0000001000000.0 |
| GPSGXVSAQQLXR 7 9 5 1 1592_1591 | 1 | 467.5669 | 1399.6788 | 3 | 43.74 | 4.20E-05 | GPSGTVSAQQLK   | Phospho (ST) | 0.0000001000000.0 |
| SXPFKXSPLXFRG 5 3 3 1 1068_1067 | 1 | 532.2739 | 1593.7999 | 3 | 43.68 | 4.30E-05 | SLPFKFSPLFFGK  | Phospho (ST) | 0.0000001000000.0 |
| GPSGXVSAQQLXR 5 5 6 1 1114_1113 | 1 | 668.8472 | 1335.6799 | 2 | 43.66 | 4.30E-05 | GPSGLVSAQQLSK  | Phospho (ST) | 0.0000001000000.0 |
| GPSGXVSAQQLXR 9 0 8 1 1818_1817 | 1 | 678.8317 | 1355.6488 | 2 | 43.57 | 4.40E-05 | GPSGVVSAQQLYK  | Phospho (ST) | 0.0000001000000.0 |
| GPSGXVSAQQLXR 8 8 3 1 1768_1767 | 1 | 684.8498 | 1367.685  | 2 | 43.53 | 4.40E-05 | GPSGVVSAQQLFK  | Phospho (ST) | 0.0000001000000.0 |
| GPSGXVSAQQLXR 5 1 0 0 1021_1020 | 1 | 675.8212 | 1349.6279 | 2 | 43.4  | 4.60E-05 | GPSGLVDAQQLAR  | Phospho (ST) | 0.0000001000000.0 |
| GPSGXVSAQQLXR 0 3 5 1 72_71     | 1 | 677.8417 | 1353.6688 | 2 | 43.33 | 4.60E-05 | GPSGAVSAQQLK   | Phospho (ST) | 0.0000001000000.0 |
| SXPFKXSPLXFRG 5 9 3 0 1187_1186 | 1 | 546.9413 | 1637.8022 | 3 | 43.29 | 4.70E-05 | SLPFKYSPLFFGK  | Phospho (ST) | 0.0000001000000.0 |
| SXPFKXSPLXFRG 3 3 4 0 669_668   | 1 | 783.8785 | 1565.7425 | 2 | 43.22 | 4.80E-05 | SFPFKFSPLGFGK  | Phospho (ST) | 0.0000001000000.0 |
| SXPFKXSPLXFRG 7 8 2 1 1566_1565 | 1 | 758.8766 | 1515.7386 | 2 | 43.02 | 5.00E-05 | STPFKVSPLFFGK  | Phospho (ST) | 0.0000001000000.0 |
| SXPFKXSPLXFRG 4 8 5 0 971_970   | 1 | 495.593  | 1483.7573 | 3 | 42.86 | 5.20E-05 | SGPFKVSPLFFGK  | Phospho (ST) | 0.0000001000000.0 |
| GPSGXVSAQQLXR 0 6 8 1 138_137   | 1 | 640.8161 | 1279.6177 | 2 | 42.74 | 5.30E-05 | GPSGAVSAQQLVK  | Phospho (ST) | 0.0000001000000.0 |
| GPSGXVSAQQLXR 9 4 2 1 1886_1885 | 1 | 686.8109 | 1371.6072 | 2 | 42.73 | 5.30E-05 | GPSGVVSAQQLGK  | Phospho (ST) | 0.0000001000000.0 |
| GPSGXVSAQQLXR 0 4 1 1 84_83     | 1 | 633.7901 | 1265.5656 | 2 | 42.7  | 5.40E-05 | GPSGAVSAQQLDK  | Phospho (ST) | 0.0000001000000.0 |
| GPSGXVSAQQLXR 3 0 8 1 618_617   | 1 | 670.8358 | 1339.6571 | 2 | 42.69 | 5.40E-05 | GPSGFVSAQQLYK  | Phospho (ST) | 0.0000001000000.0 |
| SXPFKXSPLXFRG 5 1 7 0 1035_1034 | 1 | 515.5886 | 1543.7439 | 3 | 42.61 | 5.50E-05 | SLPFKDSPLTFFGK | Phospho (ST) | 0.0000001000000.0 |
| SXPFKXSPLXFRG 5 0 0 0 1001_1000 | 1 | 735.8785 | 1469.7424 | 2 | 42.56 | 5.50E-05 | SLPFKASPLAFGR  | Phospho (ST) | 0.0000001000000.0 |
| SXPFKXSPLXFRG 2 5 3 0 507_506   | 1 | 535.6002 | 1603.7786 | 3 | 42.46 | 5.70E-05 | SEPFKLSPLFFGK  | Phospho (ST) | 0.0000001000000.0 |
| SXPFKXSPLXFRG 4 5 1 1 904_903   | 1 | 736.8631 | 1471.7116 | 2 | 42.44 | 5.70E-05 | SGPFKLSPLDFGK  | Phospho (ST) | 0.0000001000000.0 |
| GPSGXVSAQQLXR 0 9 9 0 199_198   | 1 | 724.832  | 1447.6494 | 2 | 42.42 | 5.70E-05 | GPSGAVSAQQLYR  | Phospho (ST) | 0.0000001000000.0 |
| GPSGXVSAQQLXR 2 5 2 0 505_504   | 1 | 711.8345 | 1421.6544 | 2 | 42.37 | 5.80E-05 | GPSGEVSAQQLER  | Phospho (ST) | 0.0000001000000.0 |
| GPSGXVSAQQLXR 3 3 9 1 680_679   | 1 | 740.8472 | 1479.6798 | 2 | 42.35 | 5.80E-05 | GPSGFVSAQQLYK  | Phospho (ST) | 0.0000001000000.0 |
| SXPFKXSPLXFRG 6 2 0 1 1242_1241 | 1 | 492.2376 | 1473.691  | 3 | 42.32 | 5.90E-05 | SSPFKESPLAFGK  | Phospho (ST) | 0.0000001000000.0 |
| GPSGXVSAQQLXR 3 3 2 1 666_665   | 1 | 732.8361 | 1445.6576 | 2 | 42.28 | 5.90E-05 | GPSGFVSAQQLGK  | Phospho (ST) | 0.0000001000000.0 |
| GPSGXVSAQQLXR 3 3 3 1 668_667   | 1 | 732.8495 | 1463.6845 | 2 | 42.25 | 6.00E-05 | GPSGFVSAQQLFK  | Phospho (ST) | 0.0000001000000.0 |
| GPSGXVSAQQLXR 8 3 5 1 1672_1671 | 1 | 691.8578 | 1381.701  | 2 | 42.2  | 6.00E-05 | GPSGVVSAQQLK   | Phospho (ST) | 0.0000001000000.0 |
| GPSGXVSAQQLXR 6 4 6 1 1294_1293 | 1 | 627.7902 | 1253.5658 | 2 | 42.12 | 6.10E-05 | GPSGSVSAQQLSK  | Phospho (ST) | 0.0000001000000.0 |
| GPSGXVSAQQLXR 0 4 3 0 87_86     | 1 | 663.8119 | 1325.6093 | 2 | 42.08 | 6.20E-05 | GPSGAVSAQQLFR  | Phospho (ST) | 0.0000001000000.0 |
| GPSGXVSAQQLXR 1 9 0 1 382_381   | 1 | 686.8129 | 1371.6113 | 2 | 42.06 | 6.20E-05 | GPSGDVSAQQLAK  | Phospho (ST) | 0.0000001000000.0 |
| SXPFKXSPLXFRG 3 9 0 0 799_798   | 1 | 563.6002 | 1687.7788 | 3 | 42    | 6.30E-05 | SFPFKYSPLVFGK  | Phospho (ST) | 0.0000001000000.0 |
| SXPFKXSPLXFRG 7 3 3 1 1468_1467 | 1 | 528.2619 | 1581.7639 | 3 | 42    | 6.30E-05 | STPFKFSPLFFGK  | Phospho (ST) | 0.0000001000000.0 |
| GPSGXVSAQQLXR 3 4 4 1 690_689   | 1 | 642.8027 | 1283.5909 | 2 | 41.93 | 6.40E-05 | GPSGFVSAQQLGK  | Phospho (ST) | 0.0000001000000.0 |
| SXPFKXSPLXFRG 5 8 3 0 1167_1166 | 1 | 525.6092 | 1573.8057 | 3 | 41.91 | 6.40E-05 | SLPFKVSPLFFGK  | Phospho (ST) | 0.0000001000000.0 |
| GPSGXVSAQQLXR 9 4 0 1 1882_1881 | 1 | 657.8082 | 1313.6018 | 2 | 41.9  | 6.50E-05 | GPSGVVSAQQLAK  | Phospho (ST) | 0.0000001000000.0 |
| GPSGXVSAQQLXR 5 5 7 1 1116_1115 | 1 | 675.8545 | 1349.6944 | 2 | 41.82 | 6.60E-05 | GPSGLVSLAQLTK  | Phospho (ST) | 0.0000001000000.0 |
| SXPFKXSPLXFRG 9 9 5 0 1991_1990 | 1 | 552.2726 | 1653.7959 | 3 | 41.61 | 6.90E-05 | SYPFKYSPLFFGK  | Phospho (ST) | 0.0000001000000.0 |
| SXPFKXSPLXFRG 9 3 4 1 1870_1869 | 1 | 518.9182 | 1553.7326 | 3 | 41.56 | 7.00E-05 | SYPFKFSPLGFGK  | Phospho (ST) | 0.0000001000000.0 |
| GPSGXVSAQQLXR 6 4 2 1 1286_1285 | 1 | 648.7952 | 1295.5759 | 2 | 41.4  | 7.20E-05 | GPSGSVSAQQLGK  | Phospho (ST) | 0.0000001000000.0 |
| GPSGXVSAQQLXR 0 1 1 1 24_23     | 1 | 662.7944 | 1323.5742 | 2 | 41.36 | 7.30E-05 | GPSGAVDAQQLDK  | Phospho (ST) | 0.0000001000000.0 |
| SXPFKXSPLXFRG 4 0 8 1 818_817   | 1 | 707.8596 | 1413.7046 | 2 | 41.32 | 7.40E-05 | SGPFKASPLVFGK  | Phospho (ST) | 0.0000001000000.0 |
| SXPFKXSPLXFRG 6 0 6 0 1213_1212 | 1 | 730.8487 | 1459.6828 | 2 | 41.19 | 7.60E-05 | SSPFKASPLSFGK  | Phospho (ST) | 0.0000001000000.0 |

|                                |   |          |           |   |       |          |                |              |                   |
|--------------------------------|---|----------|-----------|---|-------|----------|----------------|--------------|-------------------|
| GPSGXVSAQLXR 2 0 8 1 418_417   | 1 | 661.8235 | 1321.6325 | 2 | 41.19 | 0.00014  | GPSGEVSAALQV   | Phospho (ST) | 0.0000001000000.0 |
| SXPFKXSPLXFR 5 8 6 0 1173_1172 | 1 | 505.5963 | 1513.7671 | 3 | 41.18 | 7.60E-05 | SLPFKVSPLSFR   | Phospho (ST) | 0.0000001000000.0 |
| GPSGXVSAQLXR 5 5 3 1 1108_1107 | 1 | 698.8657 | 1395.7169 | 2 | 41.13 | 7.70E-05 | GPSGLVSLAQLFK  | Phospho (ST) | 0.0000001000000.0 |
| GPSGXVSAQLXR 4 8 4 1 970_969   | 1 | 618.8029 | 1235.5912 | 2 | 41.1  | 7.80E-05 | GPSGGVSAVQLGK  | Phospho (ST) | 0.0000001000000.0 |
| SXPFKXSPLXFR 5 8 4 0 1169_1168 | 1 | 742.886  | 1483.7575 | 2 | 40.94 | 8.10E-05 | SLPFKVSPLGFR   | Phospho (ST) | 0.0000001000000.0 |
| GPSGXVSAQLXR 2 3 0 1 462_461   | 1 | 685.8209 | 1369.6273 | 2 | 40.92 | 8.10E-05 | GPSGEVSAFQALAK | Phospho (ST) | 0.0000001000000.0 |
| GPSGXVSAQLXR 2 0 0 0 401_400   | 1 | 661.8084 | 1321.6023 | 2 | 40.87 | 8.20E-05 | GPSGEVSAALQAR  | Phospho (ST) | 0.0000001000000.0 |
| GPSGXVSAQLXR 5 0 6 1 1014_1013 | 1 | 647.8239 | 1293.6333 | 2 | 40.85 | 8.20E-05 | GPSGLVSAALQSK  | Phospho (ST) | 0.0000001000000.0 |
| GPSGXVSAQLXR 9 5 5 1 1912_1911 | 1 | 706.8631 | 1411.7116 | 2 | 40.84 | 8.20E-05 | GPSGVVSLAQLLK  | Phospho (ST) | 0.0000001000000.0 |
| GPSGXVSAQLXR 8 0 4 1 1610_1609 | 1 | 625.8107 | 1249.6069 | 2 | 40.71 | 8.50E-05 | GPSGVVSAALQGK  | Phospho (ST) | 0.0000001000000.0 |
| SXPFKXSPLXFR 7 4 5 0 1491_1490 | 1 | 496.253  | 1485.7372 | 3 | 40.54 | 8.80E-05 | STPFKGSPLLFGR  | Phospho (ST) | 0.0000001000000.0 |
| GPSGXVSAQLXR 0 4 3 1 88_87     | 1 | 649.8104 | 1297.6062 | 2 | 40.53 | 8.90E-05 | GPSGAVSAAQLSK  | Phospho (ST) | 0.0000001000000.0 |
| GPSGXVSAQLXR 3 3 0 1 662_661   | 1 | 694.8336 | 1387.6526 | 2 | 40.46 | 9.00E-05 | GPSGFVSAFQALAK | Phospho (ST) | 0.0000001000000.0 |
| GPSGXVSAQLXR 3 4 6 1 694_693   | 1 | 657.809  | 1313.6035 | 2 | 40.37 | 9.20E-05 | GPSGFVSGAQLSK  | Phospho (ST) | 0.0000001000000.0 |
| GPSGXVSAQLXR 0 3 0 1 62_61     | 1 | 656.8194 | 1311.6242 | 2 | 40.36 | 9.20E-05 | GPSGAVSAAQLAK  | Phospho (ST) | 0.0000001000000.0 |
| SXPFKXSPLXFR 9 0 1 0 1803_1802 | 1 | 522.2447 | 1563.7122 | 3 | 40.12 | 9.70E-05 | SYPFKASPLDFGR  | Phospho (ST) | 0.0000001000000.0 |
| GPSGXVSAQLXR 6 1 5 1 1232_1231 | 1 | 669.8209 | 1337.6273 | 2 | 39.92 | 0.0001   | GPSGSVSDAQLLK  | Phospho (ST) | 0.0000001000000.0 |
| GPSGXVSAQLXR 3 3 8 1 678_677   | 1 | 708.85   | 1415.6855 | 2 | 39.77 | 0.00011  | GPSGFVSAALQVYK | Phospho (ST) | 0.0000001000000.0 |
| GPSGXVSAQLXR 9 0 9 1 1820_1819 | 1 | 710.8288 | 1419.643  | 2 | 39.71 | 0.00011  | GPSGVVSAALQYK  | Phospho (ST) | 0.0000001000000.0 |
| GPSGXVSAQLXR 3 8 4 1 770_769   | 1 | 663.8262 | 1325.6379 | 2 | 39.66 | 0.00011  | GPSGFVSAALQGK  | Phospho (ST) | 0.0000001000000.0 |
| SXPFKXSPLXFR 4 9 5 0 991_990   | 1 | 516.925  | 1547.7531 | 3 | 39.48 | 0.00011  | SGPFKYSPLLFGR  | Phospho (ST) | 0.0000001000000.0 |
| SXPFKXSPLXFR 9 8 8 0 1977_1976 | 1 | 788.9    | 1575.7855 | 2 | 39.39 | 0.00012  | SYPFKVSPLVFR   | Phospho (ST) | 0.0000001000000.0 |
| GPSGXVSAQLXR 1 6 8 0 337_336   | 1 | 676.813  | 1351.6114 | 2 | 39.31 | 0.00012  | GPSGDVSSAQLVR  | Phospho (ST) | 0.0000001000000.0 |
| GPSGXVSAQLXR 4 4 1 1 884_883   | 1 | 626.7823 | 1251.55   | 2 | 39.3  | 0.00012  | GPSGGVSGAQLDK  | Phospho (ST) | 0.0000001000000.0 |
| SXPFKXSPLXFR 9 5 0 0 1901_1900 | 1 | 521.5966 | 1561.7678 | 3 | 39.16 | 0.00012  | SYPFKLSPLAFGR  | Phospho (ST) | 0.0000001000000.0 |
| GPSGXVSAQLXR 5 9 3 0 1187_1186 | 1 | 737.8557 | 1473.6968 | 2 | 39.11 | 0.0002   | GPSGLVSYAQLFR  | Phospho (ST) | 0.0000001000000.0 |
| SXPFKXSPLXFR 9 0 9 0 1819_1818 | 1 | 806.8809 | 1611.7473 | 2 | 39.05 | 0.00012  | SYPFKASPLVFR   | Phospho (ST) | 0.0000001000000.0 |
| SXPFKXSPLXFR 9 8 3 0 1967_1966 | 1 | 542.27   | 1623.788  | 3 | 39.02 | 0.00013  | SYPFKVSPLFFGR  | Phospho (ST) | 0.0000001000000.0 |
| SXPFKXSPLXFR 9 9 5 1 1992_1991 | 1 | 542.9385 | 1625.7936 | 3 | 38.99 | 0.00013  | SYPFKVSPLFFGK  | Phospho (ST) | 0.0000001000000.0 |
| GPSGXVSAQLXR 9 3 3 1 1868_1867 | 1 | 740.8478 | 1479.681  | 2 | 38.98 | 0.00013  | GPSGVVSAALQFK  | Phospho (ST) | 0.0000001000000.0 |
| SXPFKXSPLXFR 4 5 6 0 913_912   | 1 | 491.5808 | 1471.7204 | 3 | 38.92 | 0.00013  | SGPFKLSPLSFR   | Phospho (ST) | 0.0000001000000.0 |
| SXPFKXSPLXFR 4 7 4 0 949_948   | 1 | 715.843  | 1429.6715 | 2 | 38.88 | 0.00013  | SGPFKTSPLGFR   | Phospho (ST) | 0.0000001000000.0 |
| GPSGXVSAQLXR 9 6 2 1 1926_1925 | 1 | 701.8163 | 1401.618  | 2 | 38.78 | 0.00013  | GPSGVVSSAQLK   | Phospho (ST) | 0.0000001000000.0 |
| SXPFKXSPLXFR 9 0 0 1 1802_1801 | 1 | 498.2461 | 1491.7164 | 3 | 38.63 | 0.00014  | SYPFKASPLAFGK  | Phospho (ST) | 0.0000001000000.0 |
| GPSGXVSAQLXR 9 8 9 0 1979_1978 | 1 | 738.848  | 1475.6815 | 2 | 38.59 | 0.00014  | GPSGVVSAALQYR  | Phospho (ST) | 0.0000001000000.0 |
| GPSGXVSAQLXR 2 1 9 1 440_439   | 1 | 715.8136 | 1429.6126 | 2 | 38.35 | 0.00015  | GPSGEVSDAQLYK  | Phospho (ST) | 0.0000001000000.0 |
| GPSGXVSAQLXR 5 5 1 1 1104_1103 | 1 | 682.8447 | 1363.6749 | 2 | 38.28 | 0.00015  | GPSGLVSLAQLDK  | Phospho (ST) | 0.0000001000000.0 |
| SXPFKXSPLXFR 4 1 7 0 835_834   | 1 | 496.8999 | 1487.6779 | 3 | 38.1  | 0.00015  | SGPFKDSPLTFGR  | Phospho (ST) | 0.0000001000000.0 |
| GPSGXVSAQLXR 4 2 0 1 842_841   | 1 | 640.7991 | 1279.5837 | 2 | 38.04 | 0.00016  | GPSGGVSEAQLAK  | Phospho (ST) | 0.0000001000000.0 |
| SXPFKXSPLXFR 5 9 3 1 1188_1187 | 1 | 537.6072 | 1609.7997 | 3 | 37.77 | 0.00017  | SLPFKYSPLFFGK  | Phospho (ST) | 0.0000001000000.0 |
| GPSGXVSAQLXR 9 4 7 1 1896_1895 | 1 | 672.8139 | 1343.6133 | 2 | 37.72 | 0.00017  | GPSGVVSGAQLTK  | Phospho (ST) | 0.0000001000000.0 |
| GPSGXVSAQLXR 1 8 6 1 374_373   | 1 | 662.8109 | 1323.6073 | 2 | 37.71 | 0.00017  | GPSGDVSAALQSK  | Phospho (ST) | 0.0000001000000.0 |
| GPSGXVSAQLXR 5 7 0 0 1141_1140 | 1 | 668.8352 | 1335.6559 | 2 | 37.29 | 0.00019  | GPSGLVSTAQLAR  | Phospho (ST) | 0.0000001000000.0 |
| SXPFKXSPLXFR 9 2 5 0 1851_1850 | 1 | 810.8949 | 1619.7752 | 2 | 37    | 0.0002   | SYPFKESPLLFGR  | Phospho (ST) | 0.0000001000000.0 |
| GPSGXVSAQLXR 9 7 5 0 1951_1950 | 1 | 476.9019 | 1427.684  | 3 | 36.94 | 0.0002   | GPSGVVSTAQLLR  | Phospho (ST) | 0.0000001000000.0 |
| GPSGXVSAQLXR 0 3 5 0 71_70     | 1 | 691.8445 | 1381.6745 | 2 | 36.93 | 0.0002   | GPSGAVSFAQLLR  | Phospho (ST) | 0.0000001000000.0 |
| GPSGXVSAQLXR 6 3 3 1 1268_1267 | 1 | 702.8319 | 1403.6493 | 2 | 36.78 | 0.00021  | GPSGSVSAALQFK  | Phospho (ST) | 0.0000001000000.0 |
| SXPFKXSPLXFR 8 2 8 0 1657_1656 | 1 | 771.8893 | 1541.764  | 2 | 36.77 | 0.00021  | SVPFKESPLVFR   | Phospho (ST) | 0.0000001000000.0 |
| SXPFKXSPLXFR 8 0 0 1 1602_1601 | 1 | 476.9146 | 1427.7218 | 3 | 36.77 | 0.00021  | SVPFKASPLAFGK  | Phospho (ST) | 0.0000001000000.0 |
| SXPFKXSPLXFR 4 0 3 1 808_807   | 1 | 731.8603 | 1461.706  | 2 | 36.65 | 0.00022  | SGPFKASPLFFGK  | Phospho (ST) | 0.0000001000000.0 |
| SXPFKXSPLXFR 9 4 2 0 1885_1884 | 1 | 782.863  | 1563.7114 | 2 | 36.57 | 0.00022  | SYPFKGSPLFFGR  | Phospho (ST) | 0.0000001000000.0 |
| SXPFKXSPLXFR 0 5 1 0 103_102   | 1 | 757.8737 | 1513.7328 | 2 | 36.33 | 0.00023  | SAPFKLSPLDFGR  | Phospho (ST) | 0.0000001000000.0 |
| GPSGXVSAQLXR 9 3 4 1 1870_1869 | 1 | 695.8237 | 1389.6328 | 2 | 36.17 | 0.00024  | GPSGVVSAALQGK  | Phospho (ST) | 0.0000001000000.0 |
| SXPFKXSPLXFR 9 1 9 1 1840_1839 | 1 | 543.5837 | 1627.7294 | 3 | 36.15 | 0.00024  | SYPFKDSPLYFR   | Phospho (ST) | 0.0000001000000.0 |
| GPSGXVSAQLXR 2 1 6 1 434_433   | 1 | 677.7972 | 1353.5799 | 2 | 36.11 | 0.00024  | GPSGEVSDAQLSK  | Phospho (ST) | 0.0000001000000.0 |
| GPSGXVSAQLXR 8 0 3 1 1608_1607 | 1 | 670.8343 | 1339.6541 | 2 | 36.08 | 0.00025  | GPSGVVSAALQFK  | Phospho (ST) | 0.0000001000000.0 |
| GPSGXVSAQLXR 2 1 2 1 426_425   | 1 | 698.8032 | 1395.5918 | 2 | 35.94 | 0.00025  | GPSGEVSDAQLK   | Phospho (ST) | 0.0000001000000.0 |
| GPSGXVSAQLXR 4 4 4 1 890_889   | 1 | 597.7795 | 1193.5444 | 2 | 35.92 | 0.00026  | GPSGGVSGAQLGK  | Phospho (ST) | 0.0000001000000.0 |
| SXPFKXSPLXFR 0 0 8 1 18_17     | 1 | 714.8673 | 1427.7201 | 2 | 35.89 | 0.00026  | SAPFKASPLVFR   | Phospho (ST) | 0.0000001000000.0 |
| SXPFKXSPLXFR 5 6 5 0 1131_1130 | 1 | 764.8998 | 1527.7851 | 2 | 35.77 | 0.00026  | SLPFKKSPLFFGR  | Phospho (ST) | 0.0000001000000.0 |
| SXPFKXSPLXFR 3 9 8 0 797_796   | 1 | 812.9023 | 1623.7901 | 2 | 35.62 | 0.00027  | SVPFKYSPLVFR   | Phospho (ST) | 0.0000001000000.0 |
| SXPFKXSPLXFR 9 5 0 1 1902_1901 | 1 | 512.2638 | 1533.7696 | 3 | 35.58 | 0.00028  | SYPFKLSPLAFGK  | Phospho (ST) | 0.0000001000000.0 |
| SXPFKXSPLXFR 4 8 4 1 970_969   | 1 | 700.8499 | 1399.6852 | 2 | 35.49 | 0.00028  | SGPFKVSPLGFR   | Phospho (ST) | 0.0000001000000.0 |
| SXPFKXSPLXFR 9 0 3 0 1807_1806 | 1 | 798.8837 | 1595.7528 | 2 | 35.25 | 0.0003   | SYPFKASPLFFGR  | Phospho (ST) | 0.0000001000000.0 |
| GPSGXVSAQLXR 6 7 9 1 1360_1359 | 1 | 687.8201 | 1373.6256 | 2 | 35.16 | 0.0003   | GPSGSVSTAQLYK  | Phospho (ST) | 0.0000001000000.0 |
