# Supplementary material
Source: PubMed Central journal article supplement (PMC3842852)
Supplement: ac400646m_si_004.pdf [file ac400646m_si_004.pdf]

| prot_acc                   | pep_rank | pep_exp_n | pep_exp_n | pep_exp_z | pep_score | pep_expect | pep_seq        | pep_var_mod  | pep_var_mod_pos     | pep_scan_title                 |
|----------------------------|----------|-----------|-----------|-----------|-----------|------------|----------------|--------------|---------------------|--------------------------------|
| GPSGXVSAQQLXR 1 7 1 1344   | 1        | 677.8     | 1353.586  | 2         | 23.64     | 0.0071     | GPSGDVSTAQLDK  | Phospho (ST) | 0.0000001000000.0   | JC_Synth_SCX_1.2012.2012.2.dta |
| GPSGXVSAQQLXR 8 6 5 0 1731 | 1        | 675.8403  | 1349.666  | 2         | 49.64     | 4.60E-05   | GPSGVVSSAQLLR  | Phospho (ST) | 0.0000001000000.0   | JC_Synth_SCX_2.2664.2664.2.dta |
| GPSGXVSAQQLXR 3 2 1 1626   | 1        | 707.8138  | 1413.613  | 2         | 26.15     | 0.0097     | GPSGVSFAQLLEK  | Phospho (ST) | 0.0000001000000.0   | JC_Synth_SCX_2.5036.5036.2.dta |
| GPSGXVSAQQLXR 1 3 2 0 265  | 1        | 721.8169  | 1441.619  | 2         | 54.73     | 7.40E-06   | GPSGDVSSAQLLR  | Phospho (ST) | 0.0000001000000.0   | JC_Synth_SCX_2.2667.2667.2.dta |
| GPSGXVSAQQLXR 8 6 8 0 1737 | 1        | 688.8326  | 1335.651  | 2         | 35.57     | 0.0011     | GPSGVVSSAQLVR  | Phospho (ST) | 0.0000001000000.0   | JC_Synth_SCX_2.2432.2432.2.dta |
| GPSGXVSAQQLXR 9 6 0 0 153  | 1        | 655.8066  | 1309.599  | 2         | 41.48     | 0.0001     | GPSGAVSTAQLSR  | Phospho (ST) | 0.0000001000000.0   | JC_Synth_SCX_2.2096.2096.2.dta |
| GPSGXVSAQQLXR 0 6 0 0 121  | 1        | 640.8014  | 1279.588  | 2         | 28.48     | 0.0075     | GPSGAVSSAQLLR  | Phospho (ST) | 0.0000001000000.0   | JC_Synth_SCX_2.4977.4977.2.dta |
| GPSGXVSAQQLXR 9 2 8 0 1857 | 1        | 721.8353  | 1441.656  | 2         | 52.56     | 2.50E-05   | GPSGVVSSAQLVR  | Phospho (ST) | 0.0000001000000.0   | JC_Synth_SCX_2.2509.2509.2.dta |
| GPSGXVSAQQLXR 0 8 6 0 173  | 1        | 654.8171  | 1307.62   | 2         | 37.09     | 0.00067    | GPSGAVSSAQLSR  | Phospho (ST) | 0.0000001000000.0   | JC_Synth_SCX_2.4863.4863.2.dta |
| GPSGXVSAQQLXR 8 2 7 0 1655 | 1        | 690.8276  | 1379.641  | 2         | 37.67     | 0.0009     | GPSGVVSSAQLTR  | Phospho (ST) | 0.0000001000000.0   | JC_Synth_SCX_2.2296.2296.2.dta |
| GPSGXVSAQQLXR 6 8 0 0 1361 | 1        | 654.8171  | 1307.62   | 2         | 24.36     | 0.0113     | GPSGVSVAQLAR   | Phospho (ST) | 0.0000001000000.0   | JC_Synth_SCX_2.4104.4104.2.dta |
| GPSGXVSAQQLXR 5 0 6 0 1013 | 1        | 661.825   | 1321.636  | 2         | 31.57     | 0.0032     | GPSGLVSSAQLSR  | Phospho (ST) | 0.0000001000000.0   | JC_Synth_SCX_2.5404.5404.2.dta |
| GPSGXVSAQQLXR 3 8 7 0 775  | 1        | 699.8406  | 1397.667  | 2         | 56.44     | 1.20E-05   | GPSGFVSSAQLTR  | Phospho (ST) | 0.0000001000000.0   | JC_Synth_SCX_2.2968.2968.2.dta |
| GPSGXVSAQQLXR 9 6 9 0 1939 | 1        | 732.8276  | 1463.641  | 2         | 54.59     | 2.30E-05   | GPSGVVSSAQLVR  | Phospho (ST) | 0.0000001000000.0   | JC_Synth_SCX_2.2425.2425.2.dta |
| GPSGXVSAQQLXR 0 5 4 0 109  | 1        | 646.8199  | 1291.625  | 2         | 52.65     | 1.90E-05   | GPSGAVSSAQLGR  | Phospho (ST) | 0.0000001000000.0   | JC_Synth_SCX_2.2616.2616.2.dta |
| GPSGXVSAQQLXR 1 5 7 0 315  | 1        | 690.8278  | 1379.641  | 2         | 42.9      | 0.00027    | GPSGDVSLAQLTR  | Phospho (ST) | 0.0000001000000.0   | JC_Synth_SCX_2.4742.4742.2.dta |
| GPSGXVSAQQLXR 6 0 4 0 1209 | 1        | 633.7939  | 1265.573  | 2         | 39.34     | 0.001      | GPSGSVSSAQLGR  | Phospho (ST) | 0.0000001000000.0   | JC_Synth_SCX_2.2132.2132.2.dta |
| GPSGXVSAQQLXR 5 4 7 0 1095 | 1        | 661.8252  | 1321.636  | 2         | 32.42     | 0.0026     | GPSGLVSSAQLTR  | Phospho (ST) | 0.0000001000000.0   | JC_Synth_SCX_2.5262.5262.2.dta |
| GPSGXVSAQQLXR 2 6 7 0 535  | 1        | 684.8097  | 1367.605  | 2         | 39.31     | 0.00018    | GPSGVVSSAQLTR  | Phospho (ST) | 0.0000001000000.0   | JC_Synth_SCX_2.2088.2088.2.dta |
| GPSGXVSAQQLXR 6 1 6 0 1233 | 1        | 670.7941  | 1339.574  | 2         | 49.14     | 1.20E-05   | GPSGSVSSAQLSR  | Phospho (ST) | 0.0000001000000.0   | JC_Synth_SCX_2.1922.1922.2.dta |
| GPSGXVSAQQLXR 9 5 6 0 1913 | 1        | 707.8383  | 1413.662  | 2         | 46.99     | 8.70E-05   | GPSGVVSSAQLSR  | Phospho (ST) | 0.0000001000000.0   | JC_Synth_SCX_2.2808.2808.2.dta |
| GPSGXVSAQQLXR 5 6 0 0 1121 | 1        | 661.8253  | 1321.636  | 2         | 40.17     | 0.00044    | GPSGLVSSAQLAR  | Phospho (ST) | 0.0000001000000.0   | JC_Synth_SCX_2.5115.5115.2.dta |
| GPSGXVSAQQLXR 4 2 6 0 853  | 1        | 662.7968  | 1323.579  | 2         | 41.69     | 0.00019    | GPSGVVSSAQLSR  | Phospho (ST) | 0.0000001000000.0   | JC_Synth_SCX_2.1968.1968.2.dta |
| GPSGXVSAQQLXR 5 4 6 0 1093 | 1        | 654.8176  | 1307.621  | 2         | 25.45     | 0.0098     | GPSGLVSSAQLSR  | Phospho (ST) | 0.0000001000000.0   | JC_Synth_SCX_2.4719.4719.2.dta |
| GPSGXVSAQQLXR 3 1 5 0 631  | 1        | 713.8384  | 1425.662  | 2         | 47.33     | 5.30E-05   | GPSGFVSSAQLLR  | Phospho (ST) | 0.0000001000000.0   | JC_Synth_SCX_2.2970.2970.2.dta |
| GPSGXVSAQQLXR 8 6 9 0 1739 | 1        | 700.8306  | 1399.647  | 2         | 35.55     | 0.00091    | GPSGVVSSAQLVR  | Phospho (ST) | 0.0000001000000.0   | JC_Synth_SCX_2.2449.2449.2.dta |
| GPSGXVSAQQLXR 1 3 6 0 273  | 1        | 700.8125  | 1399.61   | 2         | 56.26     | 1.40E-05   | GPSGDVSSAQLSR  | Phospho (ST) | 0.0000001000000.0   | JC_Synth_SCX_2.2609.2609.2.dta |
| GPSGXVSAQQLXR 8 0 2 1 1606 | 1        | 661.8199  | 1321.625  | 2         | 43.06     | 0.00031    | GPSGVVSSAQLLEK | Phospho (ST) | 0.0000001000000.0   | JC_Synth_SCX_2.2632.2632.2.dta |
| GPSGXVSAQQLXR 9 7 1 0 1943 | 1        | 715.8179  | 1429.621  | 2         | 25.27     | 0.021      | GPSGVVSTAQLDR  | Phospho (ST) | 0.0000001000000.0   | JC_Synth_SCX_2.4853.4853.2.dta |
| GPSGXVSAQQLXR 9 7 8 0 1957 | 1        | 707.8387  | 1413.663  | 2         | 44.49     | 0.00022    | GPSGVVSTAQLVR  | Phospho (ST) | 0.0000001000000.0   | JC_Synth_SCX_2.2496.2496.2.dta |
| GPSGXVSAQQLXR 4 5 6 0 913  | 1        | 654.8179  | 1307.621  | 2         | 27.01     | 0.0057     | GPSGDVSSAQLSR  | Phospho (ST) | 0.0000001000000.0   | JC_Synth_SCX_2.5293.5293.2.dta |
| GPSGXVSAQQLXR 4 7 8 0 957  | 1        | 654.818   | 1307.621  | 2         | 45.01     | 9.00E-05   | GPSGVVSTAQLVR  | Phospho (ST) | 0.0000001000000.0   | JC_Synth_SCX_2.2292.2292.2.dta |
| GPSGXVSAQQLXR 1 1 7 0 235  | 1        | 691.7999  | 1381.585  | 2         | 53.81     | 1.80E-05   | GPSGDVSSAQLTR  | Phospho (ST) | 0.0000001000000.0   | JC_Synth_SCX_2.2104.2104.2.dta |
| GPSGXVSAQQLXR 5 1 0 0 1021 | 1        | 675.8234  | 1349.632  | 2         | 47.96     | 6.30E-05   | GPSGLVSSAQLAR  | Phospho (ST) | 0.0000001000000.0   | JC_Synth_SCX_2.2504.2504.2.dta |
| GPSGXVSAQQLXR 2 0 6 0 413  | 1        | 669.8052  | 1337.596  | 2         | 64.46     | 1.70E-06   | GPSGVVSSAQLSR  | Phospho (ST) | 0.0000001000000.0   | JC_Synth_SCX_2.2136.2136.2.dta |
| GPSGXVSAQQLXR 6 8 5 0 1371 | 1        | 675.8416  | 1349.669  | 2         | 53.38     | 6.90E-06   | GPSGSVSSAQLLR  | Phospho (ST) | 0.0000001000000.0   | JC_Synth_SCX_2.2976.2976.2.dta |
| GPSGXVSAQQLXR 3 5 6 0 713  | 1        | 699.8416  | 1397.669  | 2         | 58.13     | 6.90E-06   | GPSGFVSSAQLSR  | Phospho (ST) | 0.0000001000000.0   | JC_Synth_SCX_2.3121.3121.2.dta |
| GPSGXVSAQQLXR 0 1 7 0 35   | 1        | 669.8054  | 1337.596  | 2         | 49.19     | 5.60E-05   | GPSGAVSSAQLTR  | Phospho (ST) | 0.0000001000000.0   | JC_Synth_SCX_2.1976.1976.2.dta |
| GPSGXVSAQQLXR 6 5 6 0 1313 | 1        | 669.8235  | 1337.633  | 2         | 23.75     | 0.007      | GPSGSVSSAQLSR  | Phospho (ST) | 0.0000001000000.0   | JC_Synth_SCX_2.4109.4109.2.dta |
| GPSGXVSAQQLXR 8 6 0 0 1721 | 1        | 654.8185  | 1307.622  | 2         | 40.23     | 0.00027    | GPSGVVSSAQLAR  | Phospho (ST) | 0.0000001000000.0   | JC_Synth_SCX_2.6045.6045.2.dta |
| GPSGXVSAQQLXR 3 6 0 0 721  | 1        | 678.8185  | 1355.622  | 2         | 56.03     | 1.20E-05   | GPSGVVSSAQLAR  | Phospho (ST) | 0.0000001000000.0   | JC_Synth_SCX_2.2490.2490.2.dta |
| GPSGXVSAQQLXR 1 3 9 0 279  | 1        | 738.829   | 1475.644  | 2         | 49.69     | 4.70E-05   | GPSGDVSSAQLVR  | Phospho (ST) | 0.0000001000000.0   | JC_Synth_SCX_2.2875.2875.2.dta |
| GPSGXVSAQQLXR 8 2 6 0 1653 | 1        | 683.8212  | 1365.628  | 2         | 52.52     | 2.50E-05   | GPSGVVSSAQLSR  | Phospho (ST) | 0.0000001000000.0   | JC_Synth_SCX_2.2288.2288.2.dta |
| GPSGXVSAQQLXR 1 0 7 0 215  | 1        | 669.8057  | 1337.597  | 2         | 28.4      | 0.0069     | GPSGDVSSAQLTR  | Phospho (ST) | 0.0000001000000.0   | JC_Synth_SCX_2.4579.4579.2.dta |
| GPSGXVSAQQLXR 9 0 7 0 1815 | 1        | 693.824   | 1385.633  | 2         | 41.53     | 0.00043    | GPSGVVSSAQLTR  | Phospho (ST) | 0.0000001000000.0   | JC_Synth_SCX_2.2393.2393.2.dta |
| GPSGXVSAQQLXR 9 0 9 1 1820 | 1        | 710.8287  | 1419.643  | 2         | 31.6      | 0.0049     | GPSGVVSSAQLYK  | Phospho (ST) | 0.0000001000000.0   | JC_Synth_SCX_2.4778.4778.2.dta |
| GPSGXVSAQQLXR 6 8 6 0 1373 | 1        | 662.8162  | 1323.618  | 2         | 39.62     | 0.00011    | GPSGSVSSAQLSR  | Phospho (ST) | 0.0000001000000.0   | JC_Synth_SCX_2.2289.2289.2.dta |
| GPSGXVSAQQLXR 4 6 5 0 931  | 1        | 654.819   | 1307.623  | 2         | 43.26     | 0.00013    | GPSGVVSSAQLLR  | Phospho (ST) | 0.0000001000000.0   | JC_Synth_SCX_2.2450.2450.2.dta |
| GPSGXVSAQQLXR 2 6 3 1 528  | 1        | 693.8186  | 1385.623  | 2         | 36.9      | 0.0013     | GPSGVVSSAQLFK  | Phospho (ST) | 0.0000001000000.0   | JC_Synth_SCX_2.2568.2568.2.dta |
| GPSGXVSAQQLXR 8 7 0 0 1741 | 1        | 661.8268  | 1321.639  | 2         | 55.93     | 7.00E-06   | GPSGVVSTAQLAR  | Phospho (ST) | 0.0000001000000.0   | JC_Synth_SCX_2.2312.2312.2.dta |
| GPSGXVSAQQLXR 0 8 3 0 167  | 1        | 684.8372  | 1367.66   | 2         | 41.73     | 0.00028    | GPSGAVSSAQLFR  | Phospho (ST) | 0.0000001000000.0   | JC_Synth_SCX_2.3032.3032.2.dta |
| GPSGXVSAQQLXR 2 1 6 0 433  | 1        | 691.801   | 1381.588  | 2         | 31.63     | 0.0029     | GPSGVVSSAQLSR  | Phospho (ST) | 0.0000001000000.0   | JC_Synth_SCX_2.1950.1950.2.dta |
| GPSGXVSAQQLXR 9 3 4 0 1869 | 1        | 709.8269  | 1417.639  | 2         | 47.38     | 9.00E-05   | GPSGVVSSAQLGR  | Phospho (ST) | 0.0000001000000.0   | JC_Synth_SCX_2.2896.2896.2.dta |
| GPSGXVSAQQLXR 1 0 2 1 206  | 1        | 669.8005  | 1337.587  | 2         | 31.29     | 0.0056     | GPSGVVSSAQLLEK | Phospho (ST) | 0.0000001000000.0   | JC_Synth_SCX_2.5131.5131.2.dta |
| GPSGXVSAQQLXR 9 8 7 0 1975 | 1        | 707.8401  | 1413.666  | 2         | 33.69     | 0.0017     | GPSGVVSSAQLTR  | Phospho (ST) | 0.0000001000000.0   | JC_Synth_SCX_2.4867.4867.2.dta |
| GPSGXVSAQQLXR 7 8 5 0 1571 | 1        | 682.8505  | 1363.686  | 2         | 55.35     | 1.10E-05   | GPSGTVSSAQLLR  | Phospho (ST) | 0.0000001000000.0   | JC_Synth_SCX_2.3041.3041.2.dta |
| GPSGXVSAQQLXR 9 3 2 0 1865 | 1        | 745.8376  | 1489.661  | 2         | 35.61     | 0.0012     | GPSGVVSSAQLTR  | Phospho (ST) | 0.0000001000000.0   | JC_Synth_SCX_2.2912.2912.2.dta |
| GPSGXVSAQQLXR 1 6 7 0 335  | 1        | 677.8038  | 1353.593  | 2         | 54.18     | 7.40E-06   | GPSGDVSSAQLTR  | Phospho (ST) | 0.0000001000000.0   | JC_Synth_SCX_2.2082.2082.2.dta |
| GPSGXVSAQQLXR 0 2 1 1 44   | 1        | 669.8007  | 1337.587  | 2         | 30.44     | 0.0068     | GPSGAVSSAQLDK  | Phospho (ST) | 0.0000001000000.0   | JC_Synth_SCX_2.4427.4427.2.dta |
| GPSGXVSAQQLXR 2 9 7 0 595  | 1        | 722.8273  | 1443.64   | 2         | 46.54     | 0.00012    | GPSGEVSSAQLTR  | Phospho (ST) | 0.0000001000000.0   | JC_Synth_SCX_2.2417.2417.2.dta |
| GPSGXVSAQQLXR 3 8 3 0 767  | 1        | 722.8533  | 1443.692  | 2         | 62.35     | 2.20E-06   | GPSGVVSSAQLFR  | Phospho (ST) | 0.0000001000000.0   | JC_Synth_SCX_2.3633.3633.2.dta |
| GPSGXVSAQQLXR 6 2 6 0 1253 | 1        | 452.2051  | 1353.593  | 3         | 63.38     | 9.00E-07   | GPSGVVSSAQLSR  | Phospho (ST) | 0.0000001000000.0   | JC_Synth_SCX_2.1930.1930.3.dta |
| GPSGXVSAQQLXR 6 4 7 0 1295 | 1        | 432.8699  | 1295.588  | 3         | 47.36     | 2.50E-05   | GPSGSVSSAQLTR  | Phospho (ST) | 0.0000001000000.0   | JC_Synth_SCX_2.1929.1929.3.dta |
| GPSGXVSAQQLXR 3 9 9 0 799  | 1        | 762.8483  | 1523.682  | 2         | 31.84     | 0.0039     | GPSGFVSSAQLVR  | Phospho (ST) | 0.0000001000000.0   | JC_Synth_SCX_2.3044.3044.2.dta |
| GPSGXVSAQQLXR 3 3 1 1 664  | 1        | 716.8297  | 1431.645  | 2         | 32.46     | 0.0054     | GPSGFVSSAQLDK  | Phospho (ST) | 0.0000001000000.0   | JC_Synth_SCX_2.3152.3152.2.dta |
| GPSGXVSAQQLXR 2 8 7 0 575  | 1        | 690.8302  | 1379.646  | 2         | 56.27     | 1.30E-05   | GPSGEVSSAQLTR  | Phospho (ST) | 0.0000001000000.0   | JC_Synth_SCX_2.5257.5257.2.dta |
| GPSGXVSAQQLXR 1 6 5 0 331  | 1        | 683.8224  | 1365.63   | 2         | 59.57     | 5.30E-06   | GPSGDVSSAQLLR  | Phospho (ST) | 0.0000001000000.0   | JC_Synth_SCX_2.2448.2448.2.dta |
| GPSGXVSAQQLXR 5 0 5 1 1012 | 1        | 660.8505  | 1319.687  | 2         | 54.02     | 1.30E-05   | GPSGLVSSAQLLK  | Phospho (ST) | 0.0000001000000.0   | JC_Synth_SCX_2.3120.3120.2.dta |
| GPSGXVSAQQLXR 9 0 1 1 1804 | 1        | 686.8116  | 1371.609  | 2         | 34.66     | 0.0024     | GPSGVVSSAQLDK  | Phospho (ST) | 0.0000001000000.0   | JC_Synth_SCX_2.4924.4924.2.dta |
| GPSGXVSAQQLXR 5 0 5 0 1011 | 1        | 674.8536  | 1347.693  | 2         | 72.33     | 5.80E-08   | GPSGLVSSAQLLR  | Phospho (ST) | 0.0000001000000.0   | JC_Synth_SCX_2.3144.3144.2.dta |
| GPSGXVSAQQLXR 9 3 0 1 1862 | 1        | 702.8325  | 1403.65   | 2         | 48.27     | 0.00012    | GPSGVVSSAQLAK  | Phospho (ST) | 0.0000001000000.0   | JC_Synth_SCX_2.2937.2937.2.dta |
| GPSGXVSAQQLXR 1 9 7 0 395  | 1        | 715.8201  | 1429.626  | 2         | 60.04     | 6.10E-06   | GPSGDVSSAQLTR  | Phospho (ST) | 0.0000001000000.0   | JC_Synth_SCX_2.2384.2384.2.dta |
| GPSGXVSAQQLXR 6 4 8 1 1298 | 1        | 633.8089  | 1265.603  | 2         | 25.09     | 0.0042     | GPSGSVSSAQLVK  | Phospho (ST) | 0.0000001000000.0   | JC_Synth_SCX_2.2293.2293.2.dta |
| GPSGXVSAQQLXR 3 6 6 1 734  | 1        | 672.8143  | 1343.614  | 2         | 34.02     | 0.0053     | GPSGVVSSAQLSK  | Phospho (ST) | 0.0000001000000.0   | JC_Synth_SCX_2.2392.2392.2.dta |
| GPSGXVSAQQLXR 8 5 0 0 1701 | 1        | 667.8459  | 1333.677  | 2         | 70.91     | 1.60E-07   | PSGVVSSAQLAR   | Phospho (ST) | 0.0000001000000.0   | JC_Synth_SCX_2.2984.2984.2.dta |
| GPSGXVSAQQLXR 4 5 8 1 918  | 1        | 646.835   | 1291.655  | 2         | 59.36     | 6.00E-06   | GPSGDVSSAQLVK  | Phospho (ST) | 0.0000001000000.0   | JC_Synth_SCX_2.2938.2938.2.dta |
| GPSGXVSAQQLXR 8 8 9 0 1779 | 1        | 706.8513  | 1411.688  | 2         | 46.61     | 3.30E-05   | GPSGVVSSAQLLR  | Phospho (ST) | 0.0000001000000.0</ |                                |

|                            |   |          |          |   |       |          |                |              |                   |                                |
|----------------------------|---|----------|----------|---|-------|----------|----------------|--------------|-------------------|--------------------------------|
| GPSGXVSAQQLXR 5 5 7 0 1115 | 1 | 689.8594 | 1377.704 | 2 | 54.63 | 1.30E-05 | GPSGLVSLAQLTR  | Phospho (ST) | 0.0000001000000.0 | JC_Synth_SCX_2.3200.3200.2.dta |
| GPSGXVSAQQLXR 6 9 3 1 1388 | 1 | 710.8303 | 1419.646 | 2 | 38.17 | 0.0013   | GPSGFVSYAQLFK  | Phospho (ST) | 0.0000001000000.0 | JC_Synth_SCX_2.2928.2928.2.dta |
| GPSGXVSAQQLXR 3 2 3 0 647  | 1 | 737.8413 | 1473.668 | 2 | 40.03 | 0.00042  | GPSGFVSEQAQLFR | Phospho (ST) | 0.0000001000000.0 | JC_Synth_SCX_2.3187.3187.2.dta |
| GPSGXVSAQQLXR 0 3 1 1 64   | 1 | 678.8146 | 1355.615 | 2 | 48.56 | 0.00013  | GPSGAVSFAQLDK  | Phospho (ST) | 0.0000001000000.0 | JC_Synth_SCX_2.2648.2648.2.dta |
| GPSGXVSAQQLXR 0 6 1 1 124  | 1 | 648.7964 | 1295.578 | 2 | 27.47 | 0.00078  | GPSGAVSQAQLDK  | Phospho (ST) | 0.0000001000000.0 | JC_Synth_SCX_2.5116.5116.2.dta |
| GPSGXVSAQQLXR 4 5 3 1 908  | 1 | 670.8354 | 1339.656 | 2 | 45.03 | 0.00017  | GPSGGSVLAQLFK  | Phospho (ST) | 0.0000001000000.0 | JC_Synth_SCX_2.3373.3373.2.dta |
| GPSGXVSAQQLXR 8 8 5 1 1772 | 1 | 445.575  | 1333.703 | 3 | 44.7  | 0.00014  | GPSGVVSAQLLK   | Phospho (ST) | 0.0000001000000.0 | JC_Synth_SCX_2.3238.3238.3.dta |
| GPSGXVSAQQLXR 5 2 9 0 1059 | 1 | 728.8466 | 1455.679 | 2 | 58.71 | 4.20E-06 | GPSGLVSEQAQLYR | Phospho (ST) | 0.0000001000000.0 | JC_Synth_SCX_2.2745.2745.2.dta |
| GPSGXVSAQQLXR 0 1 8 0 37   | 1 | 668.8177 | 1335.621 | 2 | 66.97 | 7.50E-07 | GPSGAVSDAQLVR  | Phospho (ST) | 0.0000001000000.0 | JC_Synth_SCX_2.2273.2273.2.dta |
| GPSGXVSAQQLXR 5 3 0 0 1061 | 1 | 691.8464 | 1381.678 | 2 | 52.37 | 8.70E-06 | GPSGLVSAQLAR   | Phospho (ST) | 0.0000001000000.0 | JC_Synth_SCX_2.3225.3225.2.dta |
| GPSGXVSAQQLXR 2 6 5 0 531  | 1 | 690.8309 | 1379.647 | 2 | 64.18 | 2.10E-06 | GPSGEVSSAQLLR  | Phospho (ST) | 0.0000001000000.0 | JC_Synth_SCX_2.2457.2457.2.dta |
| GPSGXVSAQQLXR 4 5 5 1 912  | 1 | 653.8433 | 1305.672 | 2 | 61.05 | 3.40E-06 | GPSGGVSLAQLLK  | Phospho (ST) | 0.0000001000000.0 | JC_Synth_SCX_2.3240.3240.2.dta |
| GPSGXVSAQQLXR 3 3 8 0 677  | 1 | 722.8543 | 1443.694 | 2 | 32.49 | 0.0023   | GPSGFVSAQLVR   | Phospho (ST) | 0.0000001000000.0 | JC_Synth_SCX_2.3491.3491.2.dta |
| GPSGXVSAQQLXR 1 5 6 1 314  | 1 | 669.82   | 1337.626 | 2 | 51.49 | 2.80E-05 | GPSGDVSLAQLSK  | Phospho (ST) | 0.0000001000000.0 | JC_Synth_SCX_2.2488.2488.2.dta |
| GPSGXVSAQQLXR 6 6 6 1 1334 | 1 | 642.7965 | 1283.579 | 2 | 49.11 | 0.00016  | GPSGSVSSAQLSK  | Phospho (ST) | 0.0000001000000.0 | JC_Synth_SCX_2.1986.1986.2.dta |
| GPSGXVSAQQLXR 2 1 2 0 425  | 1 | 712.8077 | 1423.601 | 2 | 59.13 | 1.10E-05 | GPSGEVSDAQLER  | Phospho (ST) | 0.0000001000000.0 | JC_Synth_SCX_2.2099.2099.2.dta |
| GPSGXVSAQQLXR 2 2 9 0 459  | 1 | 736.826  | 1471.637 | 2 | 62.22 | 3.40E-06 | GPSGEVSEQAQLYR | Phospho (ST) | 0.0000001000000.0 | JC_Synth_SCX_2.2313.2313.2.dta |
| GPSGXVSAQQLXR 2 3 0 1 462  | 1 | 685.8226 | 1369.631 | 2 | 45.36 | 0.00019  | GPSGEVSAQLAK   | Phospho (ST) | 0.0000001000000.0 | JC_Synth_SCX_2.2713.2713.2.dta |
| GPSGXVSAQQLXR 5 9 8 0 1197 | 1 | 476.2422 | 1425.705 | 3 | 57.92 | 3.40E-06 | GPSGLVSYAQLVR  | Phospho (ST) | 0.0000001000000.0 | JC_Synth_SCX_2.3085.3085.3.dta |
| GPSGXVSAQQLXR 4 3 8 1 878  | 1 | 683.8277 | 1325.641 | 2 | 35.99 | 0.0011   | GPSGGVSAQLVK   | Phospho (ST) | 0.0000001000000.0 | JC_Synth_SCX_2.2944.2944.2.dta |
| GPSGXVSAQQLXR 8 8 3 1 1768 | 1 | 684.8513 | 1367.688 | 2 | 51.95 | 2.50E-05 | GPSGVVSAQLFK   | Phospho (ST) | 0.0000001000000.0 | JC_Synth_SCX_2.3368.3368.2.dta |
| GPSGXVSAQQLXR 0 5 5 0 111  | 1 | 674.8543 | 1347.694 | 2 | 92.12 | 6.10E-10 | GPSGAVSLAQLLR  | Phospho (ST) | 0.0000001000000.0 | JC_Synth_SCX_2.3329.3329.2.dta |
| GPSGXVSAQQLXR 6 7 6 1 1354 | 1 | 649.8044 | 1297.594 | 2 | 39.76 | 0.00052  | GPSGSVSTAQLSK  | Phospho (ST) | 0.0000001000000.0 | JC_Synth_SCX_2.2024.2024.2.dta |
| GPSGXVSAQQLXR 3 7 1 1 796  | 1 | 717.8384 | 1433.662 | 2 | 32.54 | 0.00069  | GPSGFVSAQLTK   | Phospho (ST) | 0.0000001000000.0 | JC_Synth_SCX_2.2832.2832.2.dta |
| GPSGXVSAQQLXR 6 5 5 1 1312 | 1 | 668.8487 | 1335.683 | 2 | 43.47 | 0.00028  | GPSGSVSLAQLK   | Phospho (ST) | 0.0000001000000.0 | JC_Synth_SCX_2.3192.3192.2.dta |
| GPSGXVSAQQLXR 1 3 5 0 271  | 1 | 713.8415 | 1425.668 | 2 | 52.96 | 2.00E-05 | GPSGDVSAQLLR   | Phospho (ST) | 0.0000001000000.0 | JC_Synth_SCX_2.3272.3272.2.dta |
| GPSGXVSAQQLXR 6 8 7 1 1376 | 1 | 655.8227 | 1309.631 | 2 | 50.08 | 6.30E-05 | GPSGVVSAQLTK   | Phospho (ST) | 0.0000001000000.0 | JC_Synth_SCX_2.2360.2360.2.dta |
| GPSGXVSAQQLXR 0 5 3 1 108  | 1 | 677.8434 | 1353.672 | 2 | 46.77 | 7.90E-05 | GPSGAVSQAQLFK  | Phospho (ST) | 0.0000001000000.0 | JC_Synth_SCX_2.3432.3432.2.dta |
| GPSGXVSAQQLXR 5 0 9 0 1019 | 1 | 699.8441 | 1397.674 | 2 | 62.06 | 1.70E-06 | GPSGLVSAQLYR   | Phospho (ST) | 0.0000001000000.0 | JC_Synth_SCX_2.2810.2810.2.dta |
| GPSGXVSAQQLXR 0 5 0 0 101  | 1 | 653.8308 | 1305.647 | 2 | 84.41 | 3.60E-09 | GPSGAVSLAQLAR  | Phospho (ST) | 0.0000001000000.0 | JC_Synth_SCX_2.2753.2753.2.dta |
| GPSGXVSAQQLXR 1 5 5 0 311  | 1 | 696.8493 | 1391.684 | 2 | 60.42 | 4.10E-06 | GPSGDVSLAQLLR  | Phospho (ST) | 0.0000001000000.0 | JC_Synth_SCX_2.2944.2944.2.dta |
| GPSGXVSAQQLXR 9 3 5 0 1871 | 1 | 737.8598 | 1473.705 | 2 | 51.42 | 2.60E-05 | GPSGVVSAQLLR   | Phospho (ST) | 0.0000001000000.0 | JC_Synth_SCX_2.3488.3488.2.dta |
| GPSGXVSAQQLXR 9 5 5 1 1912 | 1 | 706.8645 | 1411.715 | 2 | 44.89 | 0.00013  | GPSGVVSLAQLK   | Phospho (ST) | 0.0000001000000.0 | JC_Synth_SCX_2.3464.3464.2.dta |
| GPSGXVSAQQLXR 3 2 5 1 652  | 1 | 706.8463 | 1411.678 | 2 | 49.94 | 3.80E-05 | GPSGFVSEQAQLK  | Phospho (ST) | 0.0000001000000.0 | JC_Synth_SCX_2.3000.3000.2.dta |
| GPSGXVSAQQLXR 1 2 0 0 241  | 1 | 683.8051 | 1365.596 | 2 | 30.65 | 0.00055  | GPSGDVSAQLAR   | Phospho (ST) | 0.0000001000000.0 | JC_Synth_SCX_2.2129.2129.2.dta |
| GPSGXVSAQQLXR 1 5 5 1 312  | 1 | 682.8463 | 1363.678 | 2 | 34.17 | 0.0021   | GPSGDVSLAQLK   | Phospho (ST) | 0.0000001000000.0 | JC_Synth_SCX_2.3208.3208.2.dta |
| GPSGXVSAQQLXR 9 4 2 1 1886 | 1 | 686.8124 | 1371.61  | 2 | 38.06 | 0.0011   | GPSGVVSAQAQLEK | Phospho (ST) | 0.0000001000000.0 | JC_Synth_SCX_2.2193.2193.2.dta |
| GPSGXVSAQQLXR 4 4 4 1 890  | 1 | 597.7808 | 1193.547 | 2 | 42.32 | 0.00013  | GPSGGVSGAQLGK  | Phospho (ST) | 0.0000001000000.0 | JC_Synth_SCX_2.2017.2017.2.dta |
| GPSGXVSAQQLXR 8 5 8 0 1717 | 1 | 454.9106 | 1361.71  | 3 | 56.58 | 2.30E-06 | GPSGVVSLAQLVR  | Phospho (ST) | 0.0000001000000.0 | JC_Synth_SCX_2.3268.3268.3.dta |
| GPSGXVSAQQLXR 5 5 3 1 1108 | 1 | 698.8671 | 1395.72  | 2 | 46.65 | 5.10E-05 | GPSGLVSLAQLFK  | Phospho (ST) | 0.0000001000000.0 | JC_Synth_SCX_2.3816.3816.2.dta |
| GPSGXVSAQQLXR 8 0 5 1 1612 | 1 | 653.8435 | 1305.673 | 2 | 33.25 | 0.0021   | GPSGVVSAQLK    | Phospho (ST) | 0.0000001000000.0 | JC_Synth_SCX_2.2913.2913.2.dta |
| GPSGXVSAQQLXR 9 9 9 0 1999 | 1 | 770.847  | 1539.68  | 2 | 68.3  | 4.90E-07 | GPSGVVSYAQLYR  | Phospho (ST) | 0.0000001000000.0 | JC_Synth_SCX_2.2761.2761.2.dta |
| GPSGXVSAQQLXR 5 9 5 1 1192 | 1 | 671.5788 | 1411.715 | 3 | 53.89 | 1.70E-05 | GPSGLVSYAQLLK  | Phospho (ST) | 0.0000001000000.0 | JC_Synth_SCX_2.3317.3317.3.dta |
| GPSGXVSAQQLXR 0 9 5 1 192  | 1 | 685.8411 | 1369.668 | 2 | 53.91 | 2.10E-05 | GPSGAVSQAQLK   | Phospho (ST) | 0.0000001000000.0 | JC_Synth_SCX_2.2872.2872.2.dta |
| GPSGXVSAQQLXR 5 5 7 1 1116 | 1 | 675.8567 | 1349.699 | 2 | 34.08 | 0.0021   | GPSGLVSLAQLTK  | Phospho (ST) | 0.0000001000000.0 | JC_Synth_SCX_2.3168.3168.2.dta |
| GPSGXVSAQQLXR 3 9 6 1 794  | 1 | 710.8308 | 1419.647 | 2 | 36.15 | 0.0018   | GPSGFVSYAQLSK  | Phospho (ST) | 0.0000001000000.0 | JC_Synth_SCX_2.2752.2752.2.dta |
| GPSGXVSAQQLXR 8 3 5 0 1671 | 1 | 470.9107 | 1409.71  | 3 | 53.54 | 5.80E-06 | GPSGVVSAQLLR   | Phospho (ST) | 0.0000001000000.0 | JC_Synth_SCX_2.3542.3542.3.dta |
| GPSGXVSAQQLXR 3 8 8 1 778  | 1 | 684.8515 | 1367.689 | 2 | 42.85 | 0.0002   | GPSGFVSAQLVK   | Phospho (ST) | 0.0000001000000.0 | JC_Synth_SCX_2.3184.3184.2.dta |
| GPSGXVSAQQLXR 2 5 7 0 515  | 1 | 697.8392 | 1393.664 | 2 | 66.04 | 1.30E-06 | GPSGEVSLAQLTR  | Phospho (ST) | 0.0000001000000.0 | JC_Synth_SCX_2.2736.2736.2.dta |
| GPSGXVSAQQLXR 3 4 6 1 694  | 1 | 657.8098 | 1313.605 | 2 | 39.65 | 0.00068  | GPSGFVSGAQLSK  | Phospho (ST) | 0.0000001000000.0 | JC_Synth_SCX_2.2376.2376.2.dta |
| GPSGXVSAQQLXR 1 0 1 0 203  | 1 | 676.7974 | 1351.58  | 2 | 57.58 | 1.10E-05 | GPSGDVSAQLDR   | Phospho (ST) | 0.0000001000000.0 | JC_Synth_SCX_2.2097.2097.2.dta |
| GPSGXVSAQQLXR 3 2 8 0 657  | 1 | 713.8417 | 1425.669 | 2 | 58.63 | 5.40E-06 | GPSGFVSEQAQLVR | Phospho (ST) | 0.0000001000000.0 | JC_Synth_SCX_2.2784.2784.2.dta |
| GPSGXVSAQQLXR 9 2 9 1 1860 | 1 | 739.8337 | 1477.653 | 2 | 46.3  | 9.50E-05 | GPSGVVSEQAQLYK | Phospho (ST) | 0.0000001000000.0 | JC_Synth_SCX_2.2481.2481.2.dta |
| GPSGXVSAQQLXR 2 2 2 0 445  | 1 | 719.816  | 1437.617 | 2 | 69.46 | 1.40E-06 | GPSGEVSEQAQLER | Phospho (ST) | 0.0000001000000.0 | JC_Synth_SCX_2.2138.2138.2.dta |
| GPSGXVSAQQLXR 9 9 9 1 2000 | 1 | 756.8441 | 1511.674 | 2 | 33.85 | 0.0026   | GPSGVVSYAQLYK  | Phospho (ST) | 0.0000001000000.0 | JC_Synth_SCX_2.2729.2729.2.dta |
| GPSGXVSAQQLXR 5 2 8 0 1057 | 1 | 696.8495 | 1391.685 | 2 | 60.51 | 4.00E-06 | GPSGLVSEQAQLVR | Phospho (ST) | 0.0000001000000.0 | JC_Synth_SCX_2.2744.2744.2.dta |
| GPSGXVSAQQLXR 5 8 5 1 1172 | 1 | 674.8672 | 1347.72  | 2 | 52.1  | 1.80E-05 | GPSGLVSAQLLK   | Phospho (ST) | 0.0000001000000.0 | JC_Synth_SCX_2.3472.3472.2.dta |
| GPSGXVSAQQLXR 0 3 3 1 68   | 1 | 694.836  | 1387.657 | 2 | 28.55 | 0.0094   | GPSGAVSFAQLFK  | Phospho (ST) | 0.0000001000000.0 | JC_Synth_SCX_2.3440.3440.2.dta |
| GPSGXVSAQQLXR 2 1 9 0 439  | 1 | 729.8186 | 1457.623 | 2 | 58.85 | 3.30E-06 | GPSGEVSDAQLYR  | Phospho (ST) | 0.0000001000000.0 | JC_Synth_SCX_2.2259.2259.2.dta |
| GPSGXVSAQQLXR 1 2 7 0 255  | 1 | 698.8107 | 1395.607 | 2 | 58.26 | 8.30E-06 | GPSGDVSEQAQLTR | Phospho (ST) | 0.0000001000000.0 | JC_Synth_SCX_2.2137.2137.2.dta |
| GPSGXVSAQQLXR 9 2 9 0 1859 | 1 | 753.8369 | 1505.659 | 2 | 72.08 | 2.30E-07 | GPSGVVSEQAQLYR | Phospho (ST) | 0.0000001000000.0 | JC_Synth_SCX_2.2522.2522.2.dta |
| GPSGXVSAQQLXR 0 4 4 1 90   | 1 | 640.7888 | 1207.563 | 2 | 47.1  | 1.90E-05 | GPSGAVSQAQLGK  | Phospho (ST) | 0.0000001000000.0 | JC_Synth_SCX_2.2032.2032.2.dta |
| GPSGXVSAQQLXR 6 5 4 1 1310 | 1 | 604.8177 | 1279.621 | 2 | 34.55 | 0.0013   | GPSGLVSAQLGK   | Phospho (ST) | 0.0000001000000.0 | JC_Synth_SCX_2.2489.2489.2.dta |
| GPSGXVSAQQLXR 9 5 9 1 1920 | 1 | 731.8545 | 1461.694 | 2 | 60.44 | 6.00E-06 | GPSGVVSLAQLYK  | Phospho (ST) | 0.0000001000000.0 | JC_Synth_SCX_2.3040.3040.2.dta |
| GPSGXVSAQQLXR 4 4 0 0 881  | 1 | 618.7919 | 1235.569 | 2 | 51.57 | 2.60E-05 | GPSGGVSGAQLAR  | Phospho (ST) | 0.0000001000000.0 | JC_Synth_SCX_2.2064.2064.2.dta |
| GPSGXVSAQQLXR 7 1 5 0 1431 | 1 | 690.8315 | 1379.648 | 2 | 28.7  | 0.0075   | GPSGVVSDAQLLR  | Phospho (ST) | 0.0000001000000.0 | JC_Synth_SCX_2.4366.4366.2.dta |
| GPSGXVSAQQLXR 6 5 3 1 1308 | 1 | 685.8413 | 1369.668 | 2 | 41.36 | 0.00038  | GPSGSVSLAQLFK  | Phospho (ST) | 0.0000001000000.0 | JC_Synth_SCX_2.3328.3328.2.dta |
| GPSGXVSAQQLXR 6 1 0 1 1222 | 1 | 648.797  | 1295.579 | 2 | 23.32 | 0.02     | GPSGSVSDAQLAK  | Phospho (ST) | 0.0000001000000.0 | JC_Synth_SCX_2.4510.4510.2.dta |
| GPSGXVSAQQLXR 9 4 9 0 1899 | 1 | 717.8263 | 1433.638 | 2 | 55.19 | 1.10E-05 | GPSGVVSGAQLYR  | Phospho (ST) | 0.0000001000000.0 | JC_Synth_SCX_2.2419.2419.2.dta |
| GPSGXVSAQQLXR 3 5 0 1 702  | 1 | 677.8439 | 1353.673 | 2 | 35.28 | 0.0011   | GPSGFVSLAQLAK  | Phospho (ST) | 0.0000001000000.0 | JC_Synth_SCX_2.3128.3128.2.dta |
| GPSGXVSAQQLXR 4 0 4 1 810  | 1 | 640.7889 | 1207.563 | 2 | 15.86 | 0.026    | GPSGGVSAQLGK   | Phospho (ST) | 0.0000001000000.0 | JC_Synth_SCX_2.5166.5166.2.dta |
| GPSGXVSAQQLXR 5 3 8 1 1078 | 1 | 691.8596 | 1381.705 | 2 | 52.31 | 2.10E-05 | GPSGLVSAQLVK   | Phospho (ST) | 0.0000001000000.0 | JC_Synth_SCX_2.3416.3416.2.dta |
| GPSGXVSAQQLXR 0 2 9 0 59   | 1 | 707.8237 | 1413.633 | 2 | 48.21 | 8.40E-05 | GPSGAVSQAQLYR  | Phospho (ST) | 0.0000001000000.0 | JC_Synth_SCX_2.2336.2336.2.dta |
| GPSGXVSAQQLXR 9 0 4 0 1809 | 1 | 671.8131 | 1341.612 | 2 | 44.11 | 7.00E-05 | GPSGVVSAQAQLGR | Phospho (ST) | 0.0000001000000.0 | JC_Synth_SCX_2.2352.2352.2.dta |
| GPSGXVSAQQLXR 1 1 9 0 239  | 1 | 722.8109 | 1443.607 | 2 | 64.03 | 1.40E-06 | GPSGDVSDAQLYR  | Phospho (ST) | 0.0000001000000.0 | JC_Synth_SCX_2.2256.2256.2.dta |
| GPSGXVSAQQLXR 5 9 5 0 1191 | 1 | 480.9144 | 1439.722 | 3 | 64.51 | 7.40E-07 | GPSGLVSAQLLR   | Phospho (ST) | 0.0000001000000.0 | JC_Synth_SCX_2.3353.3353.3.dta |
| GPSGXVSAQQLXR 0 1 4 0 29   | 1 | 647.7949 | 1293.575 | 2 | 53.64 | 6.00E-05 | GPSGAVSDAQLGR  | Phospho (ST) | 0.0000001000000.0 | JC_Synth_SCX_2.2098.2098.2.dta |
| GPSGXVSAQQLXR 1 5 3 1 308  | 1 | 699.8389 | 1397.663 | 2 | 54.17 | 2.10E-05 | GPSGDVSLAQLFK  | Phospho (ST) | 0.0000001000000.0 | JC_Synth_SCX_2.3336.3336.2.dta |

|                            |   |          |          |   |         |          |                |              |                   |                                |
|----------------------------|---|----------|----------|---|---------|----------|----------------|--------------|-------------------|--------------------------------|
| GPSGXVSAQQLXR 9 0 9 0 1819 | 1 | 724.8343 | 1447.654 | 2 | 68.11   | 6.00E-07 | GPSGVVSAQQLYR  | Phospho (ST) | 0.0000001000000.0 | JC_Synth_SCX_2.2577.2577.2.dta |
| GPSGXVSAQQLXR 8 0 4 1 1610 | 1 | 625.8126 | 1249.611 | 2 | 44.3    | 5.00E-05 | GPSGVVSAQQLGK  | Phospho (ST) | 0.0000001000000.0 | JC_Synth_SCX_2.2305.2305.2.dta |
| GPSGXVSAQQLXR 6 0 8 1 138  | 1 | 640.8179 | 1279.621 | 2 | 32.22   | 0.0022   | GPSGAVSQAQLVK  | Phospho (ST) | 0.0000001000000.0 | JC_Synth_SCX_2.4531.4531.2.dta |
| GPSGXVSAQQLXR 6 3 7 0 1395 | 1 | 468.2184 | 1401.633 | 3 | 51.46   | 4.20E-05 | GPSGGVSAQQLTR  | Phospho (ST) | 0.0000001000000.0 | JC_Synth_SCX_2.2986.2986.3.dta |
| GPSGXVSAQQLXR 5 9 7 1 1196 | 1 | 700.8469 | 1399.679 | 2 | 45.95   | 0.00039  | GPSGLVSAQQLTK  | Phospho (ST) | 0.0000001000000.0 | JC_Synth_SCX_2.2794.2794.2.dta |
| GPSGXVSAQQLXR 4 8 4 1 1970 | 1 | 618.8047 | 1235.595 | 2 | 47.4    | 1.80E-05 | GPSGGVSAQQLGK  | Phospho (ST) | 0.0000001000000.0 | JC_Synth_SCX_2.2297.2297.2.dta |
| GPSGXVSAQQLXR 1 8 7 0 375  | 1 | 683.8239 | 1365.633 | 2 | 22.9    | 0.025    | GPSGDVSAQQLTR  | Phospho (ST) | 0.0000001000000.0 | JC_Synth_SCX_2.4429.4429.2.dta |
| GPSGXVSAQQLXR 5 5 5 1 1112 | 1 | 454.9193 | 1361.736 | 3 | 90.19   | 2.20E-09 | GPSGLVSAQQLK   | Phospho (ST) | 0.0000001000000.0 | JC_Synth_SCX_2.3714.3714.3.dta |
| GPSGXVSAQQLXR 4 8 3 1 1968 | 1 | 663.8284 | 1325.642 | 2 | 53.41   | 2.10E-05 | GPSGGVSAQQLFK  | Phospho (ST) | 0.0000001000000.0 | JC_Synth_SCX_2.3096.3096.2.dta |
| GPSGXVSAQQLXR 6 2 1 1 1244 | 1 | 677.8    | 1353.586 | 2 | 33.66   | 0.00071  | GPSGVVSAQQLDK  | Phospho (ST) | 0.0000001000000.0 | JC_Synth_SCX_2.1924.1924.2.dta |
| GPSGXVSAQQLXR 0 5 5 1 112  | 1 | 660.8518 | 1319.689 | 2 | 45.58   | 9.00E-05 | GPSGAVSQAQLLK  | Phospho (ST) | 0.0000001000000.0 | JC_Synth_SCX_2.3289.3289.2.dta |
| GPSGXVSAQQLXR 0 0 1 1 4    | 1 | 640.7997 | 1279.585 | 2 | 45.84   | 0.00023  | GPSGAVSQAQLDK  | Phospho (ST) | 0.0000001000000.0 | JC_Synth_SCX_2.2128.2128.2.dta |
| GPSGXVSAQQLXR 0 2 4 0 49   | 1 | 654.8029 | 1307.591 | 2 | 55.25   | 3.30E-05 | GPSGAVSQAQLGR  | Phospho (ST) | 0.0000001000000.0 | JC_Synth_SCX_2.2131.2131.2.dta |
| GPSGXVSAQQLXR 8 8 4 0 1769 | 1 | 653.8314 | 1305.648 | 2 | 62.79   | 5.00E-07 | GPSGVVSAQQLGR  | Phospho (ST) | 0.0000001000000.0 | JC_Synth_SCX_2.2592.2592.2.dta |
| GPSGXVSAQQLXR 9 8 3 1 1968 | 1 | 716.8495 | 1431.684 | 2 | 46.05   | 0.00013  | GPSGGVSAQQLFK  | Phospho (ST) | 0.0000001000000.0 | JC_Synth_SCX_2.3337.3337.2.dta |
| GPSGXVSAQQLXR 3 5 5 1 712  | 1 | 466.2475 | 1395.721 | 3 | 36.29   | 0.00055  | GPSGFVSAQQLK   | Phospho (ST) | 0.0000001000000.0 | JC_Synth_SCX_2.3682.3682.3.dta |
| GPSGXVSAQQLXR 1 1 5 0 231  | 1 | 697.8214 | 1393.628 | 2 | 62.4    | 7.70E-06 | GPSGDVSDAQLLR  | Phospho (ST) | 0.0000001000000.0 | JC_Synth_SCX_2.2464.2464.2.dta |
| GPSGXVSAQQLXR 0 8 0 1 162  | 1 | 632.8205 | 1263.626 | 2 | 21.08   | 0.011    | GPSGAVSQAQLAK  | Phospho (ST) | 0.0000001000000.0 | JC_Synth_SCX_2.4315.4315.2.dta |
| GPSGXVSAQQLXR 0 3 5 1 72   | 1 | 677.8441 | 1353.674 | 2 | 43.34   | 0.00017  | GPSGAVSQAQLK   | Phospho (ST) | 0.0000001000000.0 | JC_Synth_SCX_2.3290.3290.2.dta |
| GPSGXVSAQQLXR 8 2 0 0 1641 | 1 | 675.8264 | 1349.638 | 2 | 58.91   | 7.10E-06 | GPSGAVSQAQLAR  | Phospho (ST) | 0.0000001000000.0 | JC_Synth_SCX_2.2344.2344.2.dta |
| GPSGXVSAQQLXR 5 2 5 1 1052 | 1 | 689.8547 | 1377.695 | 2 | 48.72   | 7.70E-05 | GPSGLVSEAQLK   | Phospho (ST) | 0.0000001000000.0 | JC_Synth_SCX_2.2952.2952.2.dta |
| GPSGXVSAQQLXR 0 4 7 1 96   | 1 | 626.8023 | 1251.59  | 2 | 30.86   | 0.0036   | GPSGAVSQAQLTK  | Phospho (ST) | 0.0000001000000.0 | JC_Synth_SCX_2.1952.1952.2.dta |
| GPSGXVSAQQLXR 2 1 5 0 431  | 1 | 704.8293 | 1407.644 | 2 | 71.9    | 8.80E-07 | GPSGEVSDAQLLR  | Phospho (ST) | 0.0000001000000.0 | JC_Synth_SCX_2.2465.2465.2.dta |
| GPSGXVSAQQLXR 9 6 2 1 1926 | 1 | 701.8184 | 1401.622 | 2 | 41.31   | 0.00078  | GPSGVVSAQQLK   | Phospho (ST) | 0.0000001000000.0 | JC_Synth_SCX_2.2208.2208.2.dta |
| GPSGXVSAQQLXR 0 9 9 1 200  | 1 | 710.8314 | 1419.648 | 2 | 56.04   | 2.10E-05 | GPSGAVSQAQLYK  | Phospho (ST) | 0.0000001000000.0 | JC_Synth_SCX_2.2544.2544.2.dta |
| GPSGXVSAQQLXR 8 5 6 1 1714 | 1 | 661.8416 | 1321.669 | 2 | 48.01   | 8.80E-05 | GPSGVVSLAQLSK  | Phospho (ST) | 0.0000001000000.0 | JC_Synth_SCX_2.2792.2792.2.dta |
| GPSGXVSAQQLXR 2 5 5 0 511  | 1 | 703.8579 | 1405.701 | 2 | 55.09   | 1.50E-05 | GPSGEVSLAQLLR  | Phospho (ST) | 0.0000001000000.0 | JC_Synth_SCX_2.3306.3306.2.dta |
| GPSGXVSAQQLXR 4 8 0 0 1961 | 1 | 639.8159 | 1277.617 | 2 | 55.55   | 3.80E-06 | GPSGGVSAQQLAR  | Phospho (ST) | 0.0000001000000.0 | JC_Synth_SCX_2.2416.2416.2.dta |
| GPSGXVSAQQLXR 0 3 4 1 70   | 1 | 649.8128 | 1297.611 | 2 | 45.46   | 0.00014  | GPSGAVSQAQLGK  | Phospho (ST) | 0.0000001000000.0 | JC_Synth_SCX_2.2641.2641.2.dta |
| GPSGXVSAQQLXR 9 5 1 0 1903 | 1 | 721.8398 | 1441.665 | 2 | 64.15   | 1.60E-06 | GPSGVVSLAQLDR  | Phospho (ST) | 0.0000001000000.0 | JC_Synth_SCX_2.2818.2818.2.dta |
| GPSGXVSAQQLXR 3 8 5 0 1771 | 1 | 705.863  | 1409.712 | 2 | 73.32   | 5.60E-08 | GPSGFVSAQQLR   | Phospho (ST) | 0.0000001000000.0 | JC_Synth_SCX_2.3512.3512.2.dta |
| GPSGXVSAQQLXR 8 5 5 0 1711 | 1 | 688.8708 | 1375.727 | 2 | 92.71   | 1.00E-09 | GPSGVVSLAQLLR  | Phospho (ST) | 0.0000001000000.0 | JC_Synth_SCX_2.3552.3552.2.dta |
| GPSGXVSAQQLXR 6 4 3 1 1288 | 1 | 657.8103 | 1313.606 | 2 | 29.25   | 0.0075   | GPSGVSQAQLFK   | Phospho (ST) | 0.0000001000000.0 | JC_Synth_SCX_2.2537.2537.2.dta |
| GPSGXVSAQQLXR 0 4 0 0 81   | 1 | 625.8002 | 1249.586 | 2 | 60.55   | 8.80E-07 | GPSGAVSQAQLAR  | Phospho (ST) | 0.0000001000000.0 | JC_Synth_SCX_2.2083.2083.2.dta |
| GPSGXVSAQQLXR 9 5 2 1 1906 | 1 | 714.8445 | 1427.675 | 2 | 35.58   | 0.0013   | GPSGVVSLAQLK   | Phospho (ST) | 0.0000001000000.0 | JC_Synth_SCX_2.2817.2817.2.dta |
| GPSGXVSAQQLXR 1 1 9 1 240  | 1 | 708.8082 | 1415.602 | 2 | 39.6    | 0.00025  | GPSGDVSDAQLYK  | Phospho (ST) | 0.0000001000000.0 | JC_Synth_SCX_2.2221.2221.2.dta |
| GPSGXVSAQQLXR 6 2 6 1 1254 | 1 | 442.8709 | 1325.591 | 3 | 39.64   | 0.00045  | GPSGSVSEAQLSK  | Phospho (ST) | 0.0000001000000.0 | JC_Synth_SCX_2.1926.1926.3.dta |
| GPSGXVSAQQLXR 4 4 0 1 882  | 1 | 604.7892 | 1207.564 | 2 | 17.81   | 0.017    | GPSGGVSAQQLAK  | Phospho (ST) | 0.0000001000000.0 | JC_Synth_SCX_2.5348.5348.2.dta |
| GPSGXVSAQQLXR 2 2 8 0 457  | 1 | 704.8294 | 1407.644 | 2 | 61.57   | 9.50E-06 | GPSGEVSEAQLVR  | Phospho (ST) | 0.0000001000000.0 | JC_Synth_SCX_2.2465.2465.2.dta |
| GPSGXVSAQQLXR 4 3 4 1 870  | 1 | 642.8051 | 1283.596 | 2 | 52.24   | 2.10E-05 | GPSGGVSAQQLGK  | Phospho (ST) | 0.0000001000000.0 | JC_Synth_SCX_2.2610.2610.2.dta |
| GPSGXVSAQQLXR 0 3 7 1 76   | 1 | 671.826  | 1341.638 | 2 | 27.6    | 0.0068   | GPSGAVSQAQLTK  | Phospho (ST) | 0.0000001000000.0 | JC_Synth_SCX_2.2688.2688.2.dta |
| GPSGXVSAQQLXR 5 5 3 0 1107 | 1 | 712.871  | 1423.727 | 2 | 60.21   | 9.50E-07 | GPSGLVSLAQLFR  | Phospho (ST) | 0.0000001000000.0 | JC_Synth_SCX_2.3841.3841.2.dta |
| GPSGXVSAQQLXR 5 3 5 0 1071 | 1 | 712.871  | 1423.727 | 2 | 31.93   | 0.00064  | GPSGLVSAQQLR   | Phospho (ST) | 0.0000001000000.0 | JC_Synth_SCX_2.3513.3513.2.dta |
| GPSGXVSAQQLXR 3 8 3 1 768  | 1 | 708.8522 | 1415.602 | 2 | 58.55   | 8.80E-06 | GPSGFVSAQQLFK  | Phospho (ST) | 0.0000001000000.0 | JC_Synth_SCX_2.3593.3593.2.dta |
| GPSGXVSAQQLXR 4 5 9 1 920  | 1 | 678.8339 | 1355.653 | 2 | 32.43   | 0.0027   | GPSGVVSLAQLYK  | Phospho (ST) | 0.0000001000000.0 | JC_Synth_SCX_2.2800.2800.2.dta |
| GPSGXVSAQQLXR 6 0 4 1 1210 | 1 | 619.7946 | 1237.575 | 2 | 27.31   | 0.0099   | GPSGSVSAQQLGK  | Phospho (ST) | 0.0000001000000.0 | JC_Synth_SCX_2.2081.2081.2.dta |
| GPSGXVSAQQLXR 0 0 0 0 1    | 1 | 632.8081 | 1263.602 | 2 | 57.24   | 1.90E-06 | GPSGAVSQAQLAR  | Phospho (ST) | 0.0000001000000.0 | JC_Synth_SCX_2.2200.2200.2.dta |
| GPSGXVSAQQLXR 5 8 4 1 1170 | 1 | 646.8364 | 1291.658 | 2 | 51.07   | 4.30E-05 | GPSGLVSAQQLGK  | Phospho (ST) | 0.0000001000000.0 | JC_Synth_SCX_2.2776.2776.6.dta |
| GPSGXVSAQQLXR 5 5 8 0 1117 | 1 | 459.583  | 1375.727 | 3 | 49.93   | 2.90E-05 | GPSGLVSLAQLVR  | Phospho (ST) | 0.0000001000000.0 | JC_Synth_SCX_2.3482.3482.3.dta |
| GPSGXVSAQQLXR 0 0 3 1 8    | 1 | 656.8208 | 1311.627 | 2 | 46.89   | 7.00E-05 | GPSGAVSQAQLFK  | Phospho (ST) | 0.0000001000000.0 | JC_Synth_SCX_2.2793.2793.2.dta |
| GPSGXVSAQQLXR 0 4 8 0 197  | 1 | 639.816  | 1277.617 | 2 | 60.49   | 1.20E-06 | GPSGAVSQAQLVR  | Phospho (ST) | 0.0000001000000.0 | JC_Synth_SCX_2.2232.2232.2.dta |
| GPSGXVSAQQLXR 6 4 0 1 1282 | 1 | 619.7947 | 1237.575 | 2 | 22.52   | 0.03     | GPSGSVSAQQLAK  | Phospho (ST) | 0.0000001000000.0 | JC_Synth_SCX_2.5189.5189.2.dta |
| GPSGXVSAQQLXR 8 5 1 1 1704 | 1 | 675.8393 | 1349.664 | 2 | 41.65   | 0.00052  | GPSGVVSLAQLDK  | Phospho (ST) | 0.0000001000000.0 | JC_Synth_SCX_2.2816.2816.2.dta |
| GPSGXVSAQQLXR 0 1 9 0 39   | 1 | 647.5467 | 1399.618 | 3 | 63.2    | 2.20E-06 | GPSGAVSQAQLYK  | Phospho (ST) | 0.0000001000000.0 | JC_Synth_SCX_2.2350.2350.3.dta |
| GPSGXVSAQQLXR 9 7 9 1 1960 | 1 | 725.8369 | 1449.659 | 2 | 48.29   | 0.00025  | GPSGVVSTAQLYK  | Phospho (ST) | 0.0000001000000.0 | JC_Synth_SCX_2.2466.2466.2.dta |
| GPSGXVSAQQLXR 6 8 8 1 1378 | 1 | 654.8339 | 1307.653 | 2 | 41.3    | 0.00033  | GPSGSVSAQQLVK  | Phospho (ST) | 0.0000001000000.0 | JC_Synth_SCX_2.2608.2608.2.dta |
| GPSGXVSAQQLXR 9 0 7 1 1816 | 1 | 679.8237 | 1357.633 | 2 | 37.37   | 0.003    | GPSGVVSAQQLTK  | Phospho (ST) | 0.0000001000000.0 | JC_Synth_SCX_2.2353.2353.2.dta |
| GPSGXVSAQQLXR 8 5 3 0 1707 | 1 | 705.8632 | 1409.712 | 2 | 64.95   | 3.80E-07 | GPSGVVSLAQLFR  | Phospho (ST) | 0.0000001000000.0 | JC_Synth_SCX_2.3664.3664.2.dta |
| GPSGXVSAQQLXR 1 0 6 1 214  | 1 | 648.7975 | 1295.581 | 2 | 30.88   | 0.0036   | GPSGDVSAQQLSK  | Phospho (ST) | 0.0000001000000.0 | JC_Synth_SCX_2.6044.6044.2.dta |
| GPSGXVSAQQLXR 8 9 4 1 1790 | 1 | 671.8262 | 1341.638 | 2 | 53.01   | 2.00E-05 | GPSGVVSAQQLGK  | Phospho (ST) | 0.0000001000000.0 | JC_Synth_SCX_2.2521.2521.2.dta |
| GPSGXVSAQQLXR 5 3 5 1 1072 | 1 | 698.868  | 1395.721 | 2 | 47.73   | 4.00E-05 | GPSGLVSAQQLK   | Phospho (ST) | 0.0000001000000.0 | JC_Synth_SCX_2.3672.3672.2.dta |
| GPSGXVSAQQLXR 2 5 2 0 505  | 1 | 711.8375 | 1421.66  | 2 | 64.83   | 5.70E-06 | GPSGEVSLAQLER  | Phospho (ST) | 0.0000001000000.0 | JC_Synth_SCX_2.2529.2529.2.dta |
| GPSGXVSAQQLXR 0 8 0 0 161  | 1 | 646.824  | 1291.633 | 2 | 83.85   | 5.60E-09 | GPSGAVSQAQLAR  | Phospho (ST) | 0.0000001000000.0 | JC_Synth_SCX_2.2456.2456.2.dta |
| GPSGXVSAQQLXR 8 8 2 0 1765 | 1 | 689.8425 | 1377.671 | 2 | 71.74   | 2.60E-07 | GPSGVVSAQQLER  | Phospho (ST) | 0.0000001000000.0 | JC_Synth_SCX_2.2624.2624.2.dta |
| GPSGXVSAQQLXR 9 7 6 1 1954 | 1 | 687.8213 | 1373.628 | 2 | 39.41   | 0.0021   | GPSGVVSTAQLSK  | Phospho (ST) | 0.0000001000000.0 | JC_Synth_SCX_2.2216.2216.2.dta |
| GPSGXVSAQQLXR 0 7 8 1 158  | 1 | 647.8262 | 1293.638 | 2 | 49.47   | 5.40E-05 | GPSGAVSQAQLVK  | Phospho (ST) | 0.0000001000000.0 | JC_Synth_SCX_2.4721.4721.2.dta |
| GPSGXVSAQQLXR 0 2 5 0 51   | 1 | 682.8347 | 1363.655 | 2 | 81.42   | 3.70E-08 | GPSGAVSQAQLR   | Phospho (ST) | 0.0000001000000.0 | JC_Synth_SCX_2.2545.2545.2.dta |
| GPSGXVSAQQLXR 9 4 4 0 1889 | 1 | 664.8059 | 1327.597 | 2 | 59.74   | 1.10E-06 | GPSGVVSAQQLGR  | Phospho (ST) | 0.0000001000000.0 | JC_Synth_SCX_2.2233.2233.2.dta |
| GPSGXVSAQQLXR 7 2 8 1 1458 | 1 | 676.8291 | 1351.644 | 2 | 37.06   | 0.0013   | GPSGTVSEAQLVK  | Phospho (ST) | 0.0000001000000.0 | JC_Synth_SCX_2.2264.2264.2.dta |
| GPSGXVSAQQLXR 0 4 0 1 82   | 1 | 611.7974 | 1221.58  | 2 | 47.87   | 1.60E-05 | GPSGAVSQAQLAK  | Phospho (ST) | 0.0000001000000.0 | JC_Synth_SCX_2.2048.2048.2.dta |
| GPSGXVSAQQLXR 0 0 4 1 10   | 1 | 611.7974 | 1221.58  | 2 | 26.94   | 0.002    | GPSGAVSQAQLGK  | Phospho (ST) | 0.0000001000000.0 | JC_Synth_SCX_2.5092.5092.2.dta |
| GPSGXVSAQQLXR 9 6 0 1 1922 | 1 | 672.816  | 1343.617 | 2 | 42.45   | 0.00079  | GPSGVVSAQQLAK  | Phospho (ST) | 0.0000001000000.0 | JC_Synth_SCX_2.2201.2201.2.dta |
| GPSGXVSAQQLXR 3 4 4 1 690  | 1 | 642.8054 | 1283.596 | 2 | 42.23   | 0.00021  | GPSGGVSAQQLGK  | Phospho (ST) | 0.0000001000000.0 | JC_Synth_SCX_2.2424.2424.2.dta |
| GPSGXVSAQQLXR 3 4 7 1 696  | 1 | 664.8185 | 1327.623 | 2 | 45.02   | 0.00016  | GPSGFVSAQQLTK  | Phospho (ST) | 0.0000001000000.0 | JC_Synth_SCX_2.2441.2441.2.dta |
| GPSGXVSAQQLXR 5 7 4 1 1150 | 1 | 647.8263 | 1293.638 | 2 | 43.25   | 0.00023  | GPSGLVSTAQQLGK | Phospho (ST) | 0.0000001000000.0 | JC_Synth_SCX_2.2440.2440.2.dta |
| GPSGXVSAQQLXR 9 6 0 0 1921 | 1 | 686.814  | 1371.613 | 2 | 30.7    | 0.0089   | GPSGVVSAQQLAR  | Phospho (ST) | 0.0000001000000.0 | JC_Synth_SCX_3.5258.5258.2.dta |
| GPSGXVSAQQLXR 9 0 9 0 1819 | 1 | 724.8297 | 1447.645 | 2 | 40.23   | 0.00075  | GPSGVVSAQQLYR  | Phospho (ST) | 0.0000001000000.0 | JC_Synth_SCX_3.4636.4636.2.dta |
| GPSGXVSAQQLXR 8 5 7 0 1715 | 1 | 682.8482 | 1363.682 | 2 | 38.92</ |          |                |              |                   |                                |

|                            |   |          |          |   |       |          |                |              |                   |                                |
|----------------------------|---|----------|----------|---|-------|----------|----------------|--------------|-------------------|--------------------------------|
| GPSGXVSAQXLXR 5 6 9 0 1139 | 1 | 707.8403 | 1413.666 | 2 | 43.4  | 0.00019  | GPSGLVSSAQLYR  | Phospho (ST) | 0.0000001000000.0 | JC_Synth_SCX_3.2594.2594.2.dta |
| GPSGXVSAQXLXR 5 1 0 0 1021 | 1 | 675.8247 | 1349.635 | 2 | 33.46 | 0.0018   | GPSGLVSDAQLAR  | Phospho (ST) | 0.0000001000000.0 | JC_Synth_SCX_3.5007.5007.2.dta |
| GPSGXVSAQXLXR 8 0 2 0 1605 | 1 | 675.8247 | 1349.635 | 2 | 40.85 | 0.00032  | GPSGVVSSAQLER  | Phospho (ST) | 0.0000001000000.0 | JC_Synth_SCX_3.4867.4867.2.dta |
| GPSGXVSAQXLXR 9 6 3 0 1927 | 1 | 483.5575 | 1447.651 | 3 | 26.86 | 0.013    | GPSGVVSSAQLFR  | Phospho (ST) | 0.0000001000000.0 | JC_Synth_SCX_3.2742.2742.3.dta |
| GPSGXVSAQXLXR 6 4 9 0 1299 | 1 | 679.8091 | 1357.604 | 2 | 46.81 | 5.60E-05 | GPSGVVSSAQLYR  | Phospho (ST) | 0.0000001000000.0 | JC_Synth_SCX_3.1946.1946.2.dta |
| GPSGXVSAQXLXR 9 3 9 0 1879 | 1 | 672.8484 | 1523.682 | 2 | 27.9  | 0.0097   | GPSGVVSSAQLYR  | Phospho (ST) | 0.0000001000000.0 | JC_Synth_SCX_3.5020.5020.2.dta |
| GPSGXVSAQXLXR 1 5 0 0 301  | 1 | 675.8248 | 1349.635 | 2 | 37.75 | 0.00066  | GPSGLVSSAQLAR  | Phospho (ST) | 0.0000001000000.0 | JC_Synth_SCX_3.4579.4579.2.dta |
| GPSGXVSAQXLXR 7 3 0 0 1461 | 1 | 685.8275 | 1369.641 | 2 | 42.47 | 0.0001   | GPSGTVSSAQLAR  | Phospho (ST) | 0.0000001000000.0 | JC_Synth_SCX_3.2692.2692.2.dta |
| GPSGXVSAQXLXR 2 3 1 1 464  | 1 | 707.8168 | 1413.619 | 2 | 25.64 | 0.013    | GPSGEVSSAQLDK  | Phospho (ST) | 0.0000001000000.0 | JC_Synth_SCX_3.4908.4908.2.dta |
| GPSGXVSAQXLXR 6 2 8 0 1257 | 1 | 683.8224 | 1365.63  | 2 | 40.9  | 0.00039  | GPSGVVSSAQLVLR | Phospho (ST) | 0.0000001000000.0 | JC_Synth_SCX_3.2210.2210.2.dta |
| GPSGXVSAQXLXR 2 5 3 0 507  | 1 | 720.8486 | 1439.683 | 2 | 55.55 | 9.10E-06 | GPSGEVSSAQLFR  | Phospho (ST) | 0.0000001000000.0 | JC_Synth_SCX_3.3372.3372.2.dta |
| GPSGXVSAQXLXR 4 6 9 0 939  | 1 | 453.5421 | 1357.605 | 3 | 36.17 | 0.00065  | GPSGVVSSAQLYR  | Phospho (ST) | 0.0000001000000.0 | JC_Synth_SCX_3.1951.1951.3.dta |
| GPSGXVSAQXLXR 9 9 3 1 1988 | 1 | 748.8458 | 1495.677 | 2 | 28.11 | 0.015    | GPSGVVSSAQLFR  | Phospho (ST) | 0.0000001000000.0 | JC_Synth_SCX_3.4733.4733.2.dta |
| GPSGXVSAQXLXR 6 9 0 0 1381 | 1 | 686.8174 | 1371.62  | 2 | 59.85 | 5.40E-06 | GPSGVVSSAQLFR  | Phospho (ST) | 0.0000001000000.0 | JC_Synth_SCX_3.2290.2290.2.dta |
| GPSGXVSAQXLXR 6 0 3 0 1207 | 1 | 678.82   | 1355.626 | 2 | 26.69 | 0.0048   | GPSGVVSSAQLFR  | Phospho (ST) | 0.0000001000000.0 | JC_Synth_SCX_3.2661.2661.2.dta |
| GPSGXVSAQXLXR 9 1 1 0 1823 | 1 | 722.81   | 1443.605 | 2 | 38.05 | 0.00054  | GPSGVVSSAQLDR  | Phospho (ST) | 0.0000001000000.0 | JC_Synth_SCX_3.2226.2226.2.dta |
| GPSGXVSAQXLXR 4 6 8 0 937  | 1 | 647.8123 | 1293.61  | 2 | 57.49 | 1.00E-05 | GPSGVVSSAQLYR  | Phospho (ST) | 0.0000001000000.0 | JC_Synth_SCX_3.1932.1932.2.dta |
| GPSGXVSAQXLXR 9 1 7 0 1835 | 1 | 477.5494 | 1429.626 | 3 | 38.29 | 0.00091  | GPSGVVSSAQLTR  | Phospho (ST) | 0.0000001000000.0 | JC_Synth_SCX_3.2246.2246.3.dta |
| GPSGXVSAQXLXR 2 2 1 0 443  | 1 | 712.8076 | 1423.601 | 2 | 40.37 | 0.00082  | GPSGEVSSAQLDR  | Phospho (ST) | 0.0000001000000.0 | JC_Synth_SCX_3.2046.2046.2.dta |
| GPSGXVSAQXLXR 4 5 7 0 915  | 1 | 441.5545 | 1321.642 | 3 | 31.03 | 0.0022   | GPSGLVSSAQLTR  | Phospho (ST) | 0.0000001000000.0 | JC_Synth_SCX_3.2125.2125.3.dta |
| GPSGXVSAQXLXR 9 2 9 0 1859 | 1 | 753.8364 | 1505.658 | 2 | 24.23 | 0.014    | GPSGVVSSAQLYR  | Phospho (ST) | 0.0000001000000.0 | JC_Synth_SCX_3.4654.4654.2.dta |
| GPSGXVSAQXLXR 6 6 9 0 1339 | 1 | 663.546  | 1387.616 | 3 | 71.14 | 3.20E-07 | GPSGVVSSAQLYR  | Phospho (ST) | 0.0000001000000.0 | JC_Synth_SCX_3.1941.1941.3.dta |
| GPSGXVSAQXLXR 9 5 4 0 1909 | 1 | 692.8361 | 1383.658 | 2 | 24.35 | 0.00099  | GPSGVVSSAQLGR  | Phospho (ST) | 0.0000001000000.0 | JC_Synth_SCX_3.3477.3477.2.dta |
| GPSGXVSAQXLXR 6 5 0 0 1301 | 1 | 661.8282 | 1321.642 | 2 | 84.55 | 9.60E-09 | GPSGLVSSAQLAR  | Phospho (ST) | 0.0000001000000.0 | JC_Synth_SCX_3.2578.2578.2.dta |
| GPSGXVSAQXLXR 9 2 6 0 1853 | 1 | 477.5496 | 1429.627 | 3 | 29.76 | 0.0065   | GPSGVVSSAQLSR  | Phospho (ST) | 0.0000001000000.0 | JC_Synth_SCX_3.5135.5135.3.dta |
| GPSGXVSAQXLXR 3 3 8 1 678  | 1 | 708.8513 | 1415.688 | 2 | 40.5  | 0.00054  | GPSGFVSSAQLVK  | Phospho (ST) | 0.0000001000000.0 | JC_Synth_SCX_3.3371.3371.2.dta |
| GPSGXVSAQXLXR 9 3 8 0 1877 | 1 | 487.5704 | 1459.689 | 3 | 44.69 | 0.00014  | GPSGVVSSAQLYR  | Phospho (ST) | 0.0000001000000.0 | JC_Synth_SCX_3.3144.3144.3.dta |
| GPSGXVSAQXLXR 8 3 1 0 1663 | 1 | 706.8337 | 1411.653 | 2 | 73.8  | 1.10E-07 | GPSGVVSSAQLDR  | Phospho (ST) | 0.0000001000000.0 | JC_Synth_SCX_3.2850.2850.2.dta |
| GPSGXVSAQXLXR 3 8 7 0 775  | 1 | 699.8441 | 1397.674 | 2 | 53.15 | 1.30E-05 | GPSGFVSSAQLTR  | Phospho (ST) | 0.0000001000000.0 | JC_Synth_SCX_3.2899.2899.2.dta |
| GPSGXVSAQXLXR 3 5 6 0 713  | 1 | 699.8441 | 1397.674 | 2 | 62.02 | 1.70E-06 | GPSGFVSSAQLSR  | Phospho (ST) | 0.0000001000000.0 | JC_Synth_SCX_3.3050.3050.2.dta |
| GPSGXVSAQXLXR 4 3 5 0 871  | 1 | 684.8387 | 1367.663 | 2 | 68.54 | 5.90E-07 | GPSGVVSSAQLLR  | Phospho (ST) | 0.0000001000000.0 | JC_Synth_SCX_3.3218.3218.2.dta |
| GPSGXVSAQXLXR 2 1 7 0 435  | 1 | 698.8104 | 1395.606 | 2 | 50.23 | 5.30E-05 | GPSGEVSSAQLTR  | Phospho (ST) | 0.0000001000000.0 | JC_Synth_SCX_3.2051.2051.2.dta |
| GPSGXVSAQXLXR 5 5 8 1 1118 | 1 | 450.2471 | 1347.719 | 3 | 61.47 | 2.10E-06 | GPSGLVSSAQLVK  | Phospho (ST) | 0.0000001000000.0 | JC_Synth_SCX_3.3373.3373.3.dta |
| GPSGXVSAQXLXR 9 2 0 0 1841 | 1 | 472.218  | 1413.632 | 3 | 70.12 | 5.40E-07 | GPSGVVSSAQLAR  | Phospho (ST) | 0.0000001000000.0 | JC_Synth_SCX_3.2287.2287.3.dta |
| GPSGXVSAQXLXR 2 9 5 0 591  | 1 | 728.847  | 1455.679 | 2 | 26.49 | 0.00071  | GPSGEVSSAQLLR  | Phospho (ST) | 0.0000001000000.0 | JC_Synth_SCX_3.5549.5549.2.dta |
| GPSGXVSAQXLXR 5 8 3 0 1167 | 1 | 705.8624 | 1409.71  | 2 | 58.7  | 1.60E-06 | GPSGVVSSAQLFR  | Phospho (ST) | 0.0000001000000.0 | JC_Synth_SCX_3.3530.3530.2.dta |
| GPSGXVSAQXLXR 5 3 8 0 1077 | 1 | 705.8624 | 1409.71  | 2 | 76.3  | 2.80E-08 | GPSGLVSSAQLVLR | Phospho (ST) | 0.0000001000000.0 | JC_Synth_SCX_3.3370.3370.2.dta |
| GPSGXVSAQXLXR 2 7 2 0 545  | 1 | 705.8184 | 1409.622 | 2 | 54.53 | 2.90E-05 | GPSGEVSSAQLER  | Phospho (ST) | 0.0000001000000.0 | JC_Synth_SCX_3.2082.2082.2.dta |
| GPSGXVSAQXLXR 2 2 9 0 459  | 1 | 736.8264 | 1471.638 | 2 | 73.83 | 1.50E-07 | GPSGEVSSAQLYR  | Phospho (ST) | 0.0000001000000.0 | JC_Synth_SCX_3.2258.2258.2.dta |
| GPSGXVSAQXLXR 9 5 7 0 1915 | 1 | 714.8495 | 1427.685 | 2 | 71.61 | 2.10E-07 | GPSGVVSSAQLTR  | Phospho (ST) | 0.0000001000000.0 | JC_Synth_SCX_3.2882.2882.2.dta |
| GPSGXVSAQXLXR 9 4 0 0 1881 | 1 | 671.8129 | 1341.611 | 2 | 65.58 | 5.80E-07 | GPSGVVSSAQLAR  | Phospho (ST) | 0.0000001000000.0 | JC_Synth_SCX_3.2186.2186.2.dta |
| GPSGXVSAQXLXR 3 9 9 0 1800 | 1 | 748.8466 | 1495.679 | 2 | 44    | 0.00034  | GPSGVVSSAQLYK  | Phospho (ST) | 0.0000001000000.0 | JC_Synth_SCX_3.2932.2932.2.dta |
| GPSGXVSAQXLXR 5 8 0 0 1117 | 1 | 459.5826 | 1375.726 | 3 | 58.67 | 2.60E-06 | GPSGLVSSAQLVLR | Phospho (ST) | 0.0000001000000.0 | JC_Synth_SCX_3.3404.3404.3.dta |
| GPSGXVSAQXLXR 9 9 3 0 1987 | 1 | 762.8497 | 1523.685 | 2 | 27.7  | 0.0073   | GPSGVVSSAQLFR  | Phospho (ST) | 0.0000001000000.0 | JC_Synth_SCX_3.4877.4877.2.dta |
| GPSGXVSAQXLXR 5 6 0 0 1121 | 1 | 661.8286 | 1321.643 | 2 | 25.83 | 0.0072   | GPSGLVSSAQLAR  | Phospho (ST) | 0.0000001000000.0 | JC_Synth_SCX_3.6010.6010.2.dta |
| GPSGXVSAQXLXR 1 3 9 0 279  | 1 | 738.8315 | 1475.648 | 2 | 57.97 | 4.50E-06 | GPSGDVSSAQLYR  | Phospho (ST) | 0.0000001000000.0 | JC_Synth_SCX_3.2818.2818.2.dta |
| GPSGXVSAQXLXR 9 3 3 0 1867 | 1 | 503.5706 | 1507.69  | 3 | 44.54 | 8.40E-05 | GPSGVVSSAQLFR  | Phospho (ST) | 0.0000001000000.0 | JC_Synth_SCX_3.3566.3566.3.dta |
| GPSGXVSAQXLXR 5 3 3 1 1068 | 1 | 715.8594 | 1429.704 | 2 | 45.96 | 9.40E-05 | GPSGLVSSAQLFK  | Phospho (ST) | 0.0000001000000.0 | JC_Synth_SCX_3.3746.3746.2.dta |
| GPSGXVSAQXLXR 0 9 7 0 195  | 1 | 693.8261 | 1385.638 | 2 | 55.43 | 1.20E-05 | GPSGAVSSAQLTR  | Phospho (ST) | 0.0000001000000.0 | JC_Synth_SCX_3.2088.2088.2.dta |
| GPSGXVSAQXLXR 8 9 3 0 1787 | 1 | 730.8522 | 1459.69  | 2 | 74.07 | 1.10E-07 | GPSGVVSSAQLFR  | Phospho (ST) | 0.0000001000000.0 | JC_Synth_SCX_3.3203.3203.2.dta |
| GPSGXVSAQXLXR 1 7 9 0 359  | 1 | 715.8211 | 1429.628 | 2 | 43.56 | 0.00027  | GPSGDVSSAQLYR  | Phospho (ST) | 0.0000001000000.0 | JC_Synth_SCX_3.1959.1959.2.dta |
| GPSGXVSAQXLXR 0 5 5 0 111  | 1 | 674.8547 | 1347.695 | 2 | 81.29 | 7.40E-09 | GPSGAVSSAQLLR  | Phospho (ST) | 0.0000001000000.0 | JC_Synth_SCX_3.3242.3242.2.dta |
| GPSGXVSAQXLXR 0 5 0 0 101  | 1 | 653.8311 | 1305.648 | 2 | 61.83 | 6.60E-07 | GPSGAVSSAQLAR  | Phospho (ST) | 0.0000001000000.0 | JC_Synth_SCX_3.2693.2693.2.dta |
| GPSGXVSAQXLXR 5 5 5 1 1112 | 1 | 681.8751 | 1361.736 | 2 | 50.97 | 1.80E-05 | GPSGLVSSAQLLK  | Phospho (ST) | 0.0000001000000.0 | JC_Synth_SCX_3.3642.3642.2.dta |
| GPSGXVSAQXLXR 5 8 8 0 1177 | 1 | 681.8625 | 1361.711 | 2 | 64.74 | 3.50E-07 | GPSGLVSSAQLVLR | Phospho (ST) | 0.0000001000000.0 | JC_Synth_SCX_3.3091.3091.2.dta |
| GPSGXVSAQXLXR 1 3 5 0 271  | 1 | 713.8419 | 1425.669 | 2 | 55.25 | 1.20E-05 | GPSGDVSSAQLLR  | Phospho (ST) | 0.0000001000000.0 | JC_Synth_SCX_3.3202.3202.2.dta |
| GPSGXVSAQXLXR 6 1 8 0 1237 | 1 | 451.5463 | 1351.617 | 3 | 51.31 | 3.10E-05 | GPSGVVSSAQLVLR | Phospho (ST) | 0.0000001000000.0 | JC_Synth_SCX_3.1942.1942.3.dta |
| GPSGXVSAQXLXR 9 2 5 0 1851 | 1 | 486.2339 | 1455.68  | 3 | 26.89 | 0.0071   | GPSGVVSSAQLLR  | Phospho (ST) | 0.0000001000000.0 | JC_Synth_SCX_3.2688.2688.3.dta |
| GPSGXVSAQXLXR 5 0 3 0 1007 | 1 | 461.567  | 1381.679 | 3 | 61.01 | 1.20E-06 | GPSGLVSSAQLFR  | Phospho (ST) | 0.0000001000000.0 | JC_Synth_SCX_3.3215.3215.3.dta |
| GPSGXVSAQXLXR 5 5 3 1 1108 | 1 | 466.2473 | 1395.72  | 3 | 64.35 | 8.60E-07 | GPSGLVSSAQLFK  | Phospho (ST) | 0.0000001000000.0 | JC_Synth_SCX_3.3764.3764.3.dta |
| GPSGXVSAQXLXR 5 2 8 0 1057 | 1 | 464.9023 | 1391.685 | 3 | 28.65 | 0.0061   | GPSGLVSSAQLVLR | Phospho (ST) | 0.0000001000000.0 | JC_Synth_SCX_3.2936.2936.3.dta |
| GPSGXVSAQXLXR 9 3 2 1 1866 | 1 | 731.8364 | 1461.658 | 2 | 27.56 | 0.011    | GPSGVVSSAQLER  | Phospho (ST) | 0.0000001000000.0 | JC_Synth_SCX_3.2616.2616.2.dta |
| GPSGXVSAQXLXR 3 1 0 0 621  | 1 | 692.8184 | 1383.622 | 2 | 45.11 | 0.0001   | GPSGFVSSAQLAR  | Phospho (ST) | 0.0000001000000.0 | JC_Synth_SCX_3.2484.2484.2.dta |
| GPSGXVSAQXLXR 0 9 9 0 199  | 1 | 483.5585 | 1447.654 | 3 | 24.83 | 0.013    | GPSGAVSSAQLYR  | Phospho (ST) | 0.0000001000000.0 | JC_Synth_SCX_3.2535.2535.3.dta |
| GPSGXVSAQXLXR 5 2 5 0 1051 | 1 | 703.8576 | 1405.701 | 2 | 48.97 | 4.90E-05 | GPSGLVSSAQLLR  | Phospho (ST) | 0.0000001000000.0 | JC_Synth_SCX_3.2930.2930.2.dta |
| GPSGXVSAQXLXR 3 3 5 1 672  | 1 | 477.5755 | 1429.705 | 3 | 25.98 | 0.0093   | GPSGFVSSAQLLK  | Phospho (ST) | 0.0000001000000.0 | JC_Synth_SCX_3.3648.3648.3.dta |
| GPSGXVSAQXLXR 9 3 9 1 1880 | 1 | 748.8469 | 1495.679 | 2 | 31.86 | 0.0056   | GPSGVVSSAQLYK  | Phospho (ST) | 0.0000001000000.0 | JC_Synth_SCX_3.4878.4878.2.dta |
| GPSGXVSAQXLXR 9 9 5 0 1991 | 1 | 745.8577 | 1489.701 | 2 | 44.24 | 0.00011  | GPSGVVSSAQLLR  | Phospho (ST) | 0.0000001000000.0 | JC_Synth_SCX_3.3010.3010.2.dta |
| GPSGXVSAQXLXR 4 3 3 1 868  | 1 | 687.8283 | 1373.642 | 2 | 40.4  | 0.00066  | GPSGDVSSAQLFR  | Phospho (ST) | 0.0000001000000.0 | JC_Synth_SCX_3.3316.3316.2.dta |
| GPSGXVSAQXLXR 6 0 2 0 1205 | 1 | 669.808  | 1337.602 | 2 | 74.59 | 1.70E-07 | GPSGVVSSAQLER  | Phospho (ST) | 0.0000001000000.0 | JC_Synth_SCX_3.2090.2090.2.dta |
| GPSGXVSAQXLXR 3 9 7 1 796  | 1 | 717.839  | 1433.663 | 2 | 41.37 | 0.0009   | GPSGFVSSAQLTK  | Phospho (ST) | 0.0000001000000.0 | JC_Synth_SCX_3.2772.2772.2.dta |
| GPSGXVSAQXLXR 4 5 8 1 918  | 1 | 646.8361 | 1291.658 | 2 | 51.67 | 3.50E-05 | GPSGLVSSAQLVK  | Phospho (ST) | 0.0000001000000.0 | JC_Synth_SCX_3.2859.2859.2.dta |
| GPSGXVSAQXLXR 9 4 1 1 1884 | 1 | 679.8051 | 1357.596 | 2 | 29.84 | 0.0047   | GPSGVVSSAQLDK  | Phospho (ST) | 0.0000001000000.0 | JC_Synth_SCX_3.5288.5288.2.dta |
| GPSGXVSAQXLXR 4 8 0 0 961  | 1 | 639.8156 | 1277.617 | 2 | 57.55 | 2.40E-06 | GPSGVVSSAQLVLR | Phospho (ST) | 0.0000001000000.0 | JC_Synth_SCX_3.2356.2356.2.dta |
| GPSGXVSAQXLXR 5 3 9 0 1079 | 1 | 737.8604 | 1473.706 | 2 | 31.04 | 0.0021   | GPSGLVSSAQLYR  | Phospho (ST) | 0.0000001000000.0 | JC_Synth_SCX_3.4597.4597.2.dta |
| GPSGXVSAQXLXR 0 0 3 0 7    | 1 | 670.8235 | 1339.633 | 2 | 59.74 | 3.00E-06 | GPSGAVSSAQLFR  | Phospho (ST) | 0.0000001000000.0 | JC_Synth_SCX_3.2770.2770.2.dta |
| GPSGXVSAQXLXR 1 5 5 1 312  | 1 | 682.8467 | 1363.679 | 2 | 48.68 | 7.50E-05 | GPSGDVSSAQLLK  | Phospho (ST) | 0.0000001000000.0 | JC_Synth_SCX_3.3138.3138.2.dta |
| GPSGXVSAQXLXR 3 5 9 1 720  | 1 | 723.8572 | 1445.7   |   |       |          |                |              |                   |                                |

|                            |   |          |          |   |       |          |               |              |                   |                                |
|----------------------------|---|----------|----------|---|-------|----------|---------------|--------------|-------------------|--------------------------------|
| GPSGXVSAQQLXR 2 4 7 0 495  | 1 | 446.8746 | 1337.676 | 3 | 60.07 | 4.70E-06 | GPSGVSQAQLTR  | Phospho (ST) | 0.0000001000000.0 | JC_Synth_SCX_3.1916.1916.3.dta |
| GPSGXVSAQQLXR 4 5 5 1 1912 | 1 | 653.8441 | 1305.674 | 2 | 49.21 | 5.20E-05 | GPSGVSQAQLLK  | Phospho (ST) | 0.0000001000000.0 | JC_Synth_SCX_3.3156.3156.2.dta |
| GPSGXVSAQQLXR 3 1 5 0 1631 | 1 | 713.8423 | 1425.67  | 2 | 80.44 | 3.60E-08 | GPSGVSQAQLLR  | Phospho (ST) | 0.0000001000000.0 | JC_Synth_SCX_3.2900.2900.2.dta |
| GPSGXVSAQQLXR 9 9 9 0 1999 | 1 | 770.8478 | 1539.681 | 2 | 26.99 | 0.00057  | GPSGVVSAQQLYR | Phospho (ST) | 0.0000001000000.0 | JC_Synth_SCX_3.4818.4818.2.dta |
| GPSGXVSAQQLXR 4 0 3 1 808  | 1 | 649.8128 | 1297.611 | 2 | 35.77 | 0.0013   | GPSGVSQAQLFK  | Phospho (ST) | 0.0000001000000.0 | JC_Synth_SCX_3.2690.2690.2.dta |
| GPSGXVSAQQLXR 6 8 6 1 1374 | 1 | 648.8156 | 1295.617 | 2 | 52.42 | 3.30E-05 | GPSGVSQAQLSK  | Phospho (ST) | 0.0000001000000.0 | JC_Synth_SCX_3.2195.2195.2.dta |
| GPSGXVSAQQLXR 3 3 8 0 1677 | 1 | 722.8553 | 1443.696 | 2 | 60.93 | 3.40E-06 | GPSGVSQAQLVR  | Phospho (ST) | 0.0000001000000.0 | JC_Synth_SCX_3.3411.3411.2.dta |
| GPSGXVSAQQLXR 9 5 1 0 1903 | 1 | 721.8398 | 1441.665 | 2 | 61.55 | 3.00E-06 | GPSGVSQAQLDR  | Phospho (ST) | 0.0000001000000.0 | JC_Synth_SCX_3.2778.2778.2.dta |
| GPSGXVSAQQLXR 6 2 1 0 1243 | 1 | 461.538  | 1381.592 | 3 | 59.22 | 3.40E-06 | GPSGVSQAQLDR  | Phospho (ST) | 0.0000001000000.0 | JC_Synth_SCX_3.1896.1896.3.dta |
| GPSGXVSAQQLXR 5 8 5 1 1172 | 1 | 674.8677 | 1347.721 | 2 | 42.95 | 0.00015  | GPSGLVSAQQLK  | Phospho (ST) | 0.0000001000000.0 | JC_Synth_SCX_3.3394.3394.2.dta |
| GPSGXVSAQQLXR 1 5 3 1 308  | 1 | 699.8392 | 1397.664 | 2 | 51.31 | 6.00E-05 | GPSGDVSAQQLFK | Phospho (ST) | 0.0000001000000.0 | JC_Synth_SCX_3.3259.3259.2.dta |
| GPSGXVSAQQLXR 5 5 5 0 1111 | 1 | 695.8787 | 1389.743 | 2 | 36.42 | 0.00044  | GPSGLVSAQQLR  | Phospho (ST) | 0.0000001000000.0 | JC_Synth_SCX_3.3679.3679.2.dta |
| GPSGXVSAQQLXR 3 3 0 1 662  | 1 | 694.8365 | 1387.658 | 2 | 48.18 | 0.0001   | GPSGFVSAQQLAK | Phospho (ST) | 0.0000001000000.0 | JC_Synth_SCX_3.3147.3147.2.dta |
| GPSGXVSAQQLXR 3 3 0 0 661  | 1 | 708.8396 | 1415.665 | 2 | 40.86 | 0.00043  | GPSGFVSAQQLAR | Phospho (ST) | 0.0000001000000.0 | JC_Synth_SCX_3.3186.3186.2.dta |
| GPSGXVSAQQLXR 1 5 9 0 319  | 1 | 721.8398 | 1441.665 | 2 | 35.85 | 0.0011   | GPSGDVSAQQLYR | Phospho (ST) | 0.0000001000000.0 | JC_Synth_SCX_3.4796.4796.2.dta |
| GPSGXVSAQQLXR 5 0 5 1 1012 | 1 | 660.852  | 1319.69  | 2 | 49.45 | 3.70E-05 | GPSGLVSAQQLK  | Phospho (ST) | 0.0000001000000.0 | JC_Synth_SCX_3.3052.3052.2.dta |
| GPSGXVSAQQLXR 3 3 3 0 1667 | 1 | 746.8554 | 1491.696 | 2 | 53.01 | 1.10E-05 | GPSGFVSAQQLFR | Phospho (ST) | 0.0000001000000.0 | JC_Synth_SCX_3.3802.3802.2.dta |
| GPSGXVSAQQLXR 3 3 5 0 671  | 1 | 486.9112 | 1457.712 | 3 | 62.42 | 2.00E-06 | GPSGFVSAQQLR  | Phospho (ST) | 0.0000001000000.0 | JC_Synth_SCX_3.3677.3677.3.dta |
| GPSGXVSAQQLXR 3 7 3 1 748  | 1 | 709.8419 | 1417.669 | 2 | 57.43 | 8.70E-06 | GPSGFVSAQQLFR | Phospho (ST) | 0.0000001000000.0 | JC_Synth_SCX_3.3090.3090.2.dta |
| GPSGXVSAQQLXR 5 2 3 1 1048 | 1 | 706.8472 | 1411.68  | 2 | 53.59 | 2.30E-05 | GPSGLVSAQQLFK | Phospho (ST) | 0.0000001000000.0 | JC_Synth_SCX_3.3029.3029.2.dta |
| GPSGXVSAQQLXR 1 7 1 0 343  | 1 | 691.8034 | 1381.592 | 2 | 39.38 | 0.00033  | GPSGDVSAQQLDR | Phospho (ST) | 0.0000001000000.0 | JC_Synth_SCX_3.1891.1891.2.dta |
| GPSGXVSAQQLXR 2 2 0 0 441  | 1 | 690.8138 | 1379.613 | 2 | 54.16 | 4.50E-05 | GPSGEVSAQQLAR | Phospho (ST) | 0.0000001000000.0 | JC_Synth_SCX_3.2091.2091.2.dta |
| GPSGXVSAQQLXR 0 2 8 0 157  | 1 | 675.8267 | 1349.639 | 2 | 56.18 | 1.40E-05 | GPSGAVSAQQLVR | Phospho (ST) | 0.0000001000000.0 | JC_Synth_SCX_3.2275.2275.2.dta |
| GPSGXVSAQQLXR 9 3 0 0 1861 | 1 | 716.8372 | 1431.66  | 2 | 55.27 | 7.60E-06 | GPSGVVSAQQLAR | Phospho (ST) | 0.0000001000000.0 | JC_Synth_SCX_3.2914.2914.2.dta |
| GPSGXVSAQQLXR 3 5 4 0 709  | 1 | 684.8396 | 1367.665 | 2 | 65.29 | 1.20E-06 | GPSGFVSAQQLGR | Phospho (ST) | 0.0000001000000.0 | JC_Synth_SCX_3.2066.2066.2.dta |
| GPSGXVSAQQLXR 5 9 1 0 1183 | 1 | 721.84   | 1441.665 | 2 | 42.23 | 0.00025  | GPSGLVSAQQLDR | Phospho (ST) | 0.0000001000000.0 | JC_Synth_SCX_3.4651.4651.2.dta |
| GPSGXVSAQQLXR 3 8 5 1 772  | 1 | 691.86   | 1381.706 | 2 | 42.79 | 0.00019  | GPSGFVSAQQLK  | Phospho (ST) | 0.0000001000000.0 | JC_Synth_SCX_3.3410.3410.2.dta |
| GPSGXVSAQQLXR 3 5 6 1 714  | 1 | 685.8419 | 1369.669 | 2 | 36.78 | 0.0011   | GPSGFVSAQQLSK | Phospho (ST) | 0.0000001000000.0 | JC_Synth_SCX_3.3002.3002.2.dta |
| GPSGXVSAQQLXR 6 4 3 1 1288 | 1 | 657.8105 | 1313.606 | 2 | 46.83 | 0.00013  | GPSGVSQAQLFK  | Phospho (ST) | 0.0000001000000.0 | JC_Synth_SCX_3.2483.2483.2.dta |
| GPSGXVSAQQLXR 1 8 3 1 368  | 1 | 692.8315 | 1383.649 | 2 | 48.03 | 0.00012  | GPSGDVSAQQLFK | Phospho (ST) | 0.0000001000000.0 | JC_Synth_SCX_3.3019.3019.2.dta |
| GPSGXVSAQQLXR 3 8 4 0 769  | 1 | 677.8318 | 1353.649 | 2 | 52.38 | 1.40E-05 | GPSGFVSAQQLGR | Phospho (ST) | 0.0000001000000.0 | JC_Synth_SCX_3.2802.2802.2.dta |
| GPSGXVSAQQLXR 6 4 0 0 1281 | 1 | 633.7979 | 1265.581 | 2 | 35.41 | 0.00039  | GPSGVSQAQLAR  | Phospho (ST) | 0.0000001000000.0 | JC_Synth_SCX_3.1883.1883.2.dta |
| GPSGXVSAQQLXR 5 8 4 0 1169 | 1 | 660.8396 | 1319.665 | 2 | 62.61 | 9.00E-07 | GPSGLVSAQQLGR | Phospho (ST) | 0.0000001000000.0 | JC_Synth_SCX_3.2748.2748.2.dta |
| GPSGXVSAQQLXR 5 9 8 0 1197 | 1 | 776.2429 | 1425.707 | 3 | 74.47 | 7.50E-08 | GPSGLVSAQQLVR | Phospho (ST) | 0.0000001000000.0 | JC_Synth_SCX_3.2006.2006.3.dta |
| GPSGXVSAQQLXR 6 8 7 1 1376 | 1 | 655.8236 | 1309.633 | 2 | 36.15 | 0.0022   | GPSGAVSAQQLTK | Phospho (ST) | 0.0000001000000.0 | JC_Synth_SCX_3.2307.2307.2.dta |
| GPSGXVSAQQLXR 0 3 4 0 169  | 1 | 663.8162 | 1325.618 | 2 | 57.66 | 2.80E-06 | GPSGAVSAQQLGR | Phospho (ST) | 0.0000001000000.0 | JC_Synth_SCX_3.2634.2634.2.dta |
| GPSGXVSAQQLXR 0 2 5 0 51   | 1 | 455.5589 | 1363.655 | 3 | 26.87 | 0.01     | GPSGAVSAQQLR  | Phospho (ST) | 0.0000001000000.0 | JC_Synth_SCX_3.2623.2623.3.dta |
| GPSGXVSAQQLXR 7 8 8 1 1578 | 1 | 661.8419 | 1321.669 | 2 | 28.29 | 0.0069   | GPSGTVSAQQLVK | Phospho (ST) | 0.0000001000000.0 | JC_Synth_SCX_3.2820.2820.2.dta |
| GPSGXVSAQQLXR 0 0 0 0 1    | 1 | 632.8083 | 1263.602 | 2 | 66.41 | 2.30E-07 | GPSGAVSAQQLAR | Phospho (ST) | 0.0000001000000.0 | JC_Synth_SCX_3.2275.2275.2.dta |
| GPSGXVSAQQLXR 4 3 4 1 870  | 1 | 642.8053 | 1283.596 | 2 | 44.55 | 0.00012  | GPSGVSQAQLGK  | Phospho (ST) | 0.0000001000000.0 | JC_Synth_SCX_3.2547.2547.2.dta |
| GPSGXVSAQQLXR 6 5 5 1 1312 | 1 | 668.8498 | 1335.685 | 2 | 39.48 | 0.00064  | GPSGVSQAQLLK  | Phospho (ST) | 0.0000001000000.0 | JC_Synth_SCX_3.3115.3115.2.dta |
| GPSGXVSAQQLXR 3 2 2 0 1645 | 1 | 728.8298 | 1455.645 | 2 | 58.71 | 1.10E-05 | GPSGFVSAQQLER | Phospho (ST) | 0.0000001000000.0 | JC_Synth_SCX_3.2527.2527.2.dta |
| GPSGXVSAQQLXR 3 2 8 0 1657 | 1 | 713.8427 | 1425.671 | 2 | 69.19 | 4.80E-07 | GPSGFVSAQQLVR | Phospho (ST) | 0.0000001000000.0 | JC_Synth_SCX_3.2722.2722.2.dta |
| GPSGXVSAQQLXR 1 6 5 0 331  | 1 | 456.2187 | 1365.634 | 3 | 45.5  | 0.00014  | GPSGDVSAQQLR  | Phospho (ST) | 0.0000001000000.0 | JC_Synth_SCX_3.2387.2387.3.dta |
| GPSGXVSAQQLXR 8 1 8 0 1637 | 1 | 682.8348 | 1363.655 | 2 | 72.42 | 3.20E-07 | GPSGVSQAQLVR  | Phospho (ST) | 0.0000001000000.0 | JC_Synth_SCX_3.2411.2411.2.dta |
| GPSGXVSAQQLXR 3 4 0 0 1681 | 1 | 663.8164 | 1325.618 | 2 | 68.28 | 2.50E-07 | GPSGFVSAQQLAR | Phospho (ST) | 0.0000001000000.0 | JC_Synth_SCX_3.2426.2426.2.dta |
| GPSGXVSAQQLXR 6 0 7 0 1335 | 1 | 663.804  | 1325.594 | 2 | 61.07 | 2.50E-06 | GPSGVSQAQLTR  | Phospho (ST) | 0.0000001000000.0 | JC_Synth_SCX_3.1859.1859.2.dta |
| GPSGXVSAQQLXR 9 5 6 0 1913 | 1 | 707.8382 | 1413.662 | 2 | 55.33 | 1.30E-05 | GPSGVSQAQLSR  | Phospho (ST) | 0.0000001000000.0 | JC_Synth_SCX_4.2695.2695.2.dta |
| GPSGXVSAQQLXR 9 6 9 0 1939 | 1 | 732.8283 | 1463.642 | 2 | 51.75 | 5.50E-05 | GPSGVVSAQQLYR | Phospho (ST) | 0.0000001000000.0 | JC_Synth_SCX_4.2357.2357.2.dta |
| GPSGXVSAQQLXR 3 6 2 0 725  | 1 | 707.8206 | 1413.627 | 2 | 70.41 | 9.90E-07 | GPSGFVSAQQLER | Phospho (ST) | 0.0000001000000.0 | JC_Synth_SCX_4.2410.2410.2.dta |
| GPSGXVSAQQLXR 6 0 6 0 1213 | 1 | 648.7997 | 1295.585 | 2 | 54.15 | 5.80E-06 | GPSGVSQAQLSR  | Phospho (ST) | 0.0000001000000.0 | JC_Synth_SCX_4.2009.2009.2.dta |
| GPSGXVSAQQLXR 0 3 2 1 66   | 1 | 685.8209 | 1369.627 | 2 | 49.39 | 9.00E-05 | GPSGAVSAQQLER | Phospho (ST) | 0.0000001000000.0 | JC_Synth_SCX_4.2682.2682.2.dta |
| GPSGXVSAQQLXR 9 3 3 0 1867 | 1 | 754.8503 | 1507.686 | 2 | 61.42 | 3.10E-06 | GPSGVVSAQQLFR | Phospho (ST) | 0.0000001000000.0 | JC_Synth_SCX_4.3445.3445.2.dta |
| GPSGXVSAQQLXR 5 3 1 0 1063 | 1 | 713.84   | 1425.665 | 2 | 53.75 | 1.50E-05 | GPSGLVSAQQLDR | Phospho (ST) | 0.0000001000000.0 | JC_Synth_SCX_4.3011.3011.2.dta |
| GPSGXVSAQQLXR 0 7 4 0 149  | 1 | 640.8036 | 1279.593 | 2 | 45.14 | 0.00015  | GPSGAVSAQQLGR | Phospho (ST) | 0.0000001000000.0 | JC_Synth_SCX_4.2041.2041.2.dta |
| GPSGXVSAQQLXR 9 7 9 0 1959 | 1 | 739.8378 | 1477.661 | 2 | 25.03 | 0.016    | GPSGVVSAQQLYR | Phospho (ST) | 0.0000001000000.0 | JC_Synth_SCX_4.2669.2669.2.dta |
| GPSGXVSAQQLXR 2 7 6 0 553  | 1 | 684.8118 | 1367.609 | 2 | 24.18 | 0.00092  | GPSGEVSAQQLSR | Phospho (ST) | 0.0000001000000.0 | JC_Synth_SCX_4.1876.1876.2.dta |
| GPSGXVSAQQLXR 5 6 0 0 1121 | 1 | 661.8273 | 1321.64  | 2 | 67.95 | 4.40E-07 | GPSGLVSAQQLAR | Phospho (ST) | 0.0000001000000.0 | JC_Synth_SCX_4.2375.2375.2.dta |
| GPSGXVSAQQLXR 4 4 3 0 887  | 1 | 656.8064 | 1311.598 | 2 | 75.24 | 1.40E-07 | GPSGVSQAQLFR  | Phospho (ST) | 0.0000001000000.0 | JC_Synth_SCX_4.2544.2544.2.dta |
| GPSGXVSAQQLXR 8 9 7 0 1795 | 1 | 707.8406 | 1413.667 | 2 | 60.9  | 3.30E-06 | GPSGVVSAQQLTR | Phospho (ST) | 0.0000001000000.0 | JC_Synth_SCX_4.2552.2552.2.dta |
| GPSGXVSAQQLXR 2 6 7 0 535  | 1 | 684.8121 | 1367.61  | 2 | 52.81 | 1.30E-05 | GPSGEVSAQQLTR | Phospho (ST) | 0.0000001000000.0 | JC_Synth_SCX_4.2015.2015.2.dta |
| GPSGXVSAQQLXR 3 1 2 0 625  | 1 | 721.8199 | 1441.625 | 2 | 55.58 | 1.40E-05 | GPSGFVSAQQLER | Phospho (ST) | 0.0000001000000.0 | JC_Synth_SCX_4.2443.2443.2.dta |
| GPSGXVSAQQLXR 4 9 3 1 988  | 1 | 695.8248 | 1389.635 | 2 | 35.73 | 0.0022   | GPSGVSQAQLFK  | Phospho (ST) | 0.0000001000000.0 | JC_Synth_SCX_4.2876.2876.2.dta |
| GPSGXVSAQQLXR 6 4 1 0 1283 | 1 | 655.7914 | 1309.568 | 2 | 51.26 | 4.30E-05 | GPSGVSQAQLDR  | Phospho (ST) | 0.0000001000000.0 | JC_Synth_SCX_4.1857.1857.2.dta |
| GPSGXVSAQQLXR 6 9 0 0 1381 | 1 | 686.8177 | 1371.621 | 2 | 51.46 | 3.70E-05 | GPSGVSQAQLAR  | Phospho (ST) | 0.0000001000000.0 | JC_Synth_SCX_4.2271.2271.2.dta |
| GPSGXVSAQQLXR 9 5 3 0 1907 | 1 | 737.8596 | 1473.705 | 2 | 73.45 | 1.60E-07 | GPSGVVSAQQLFR | Phospho (ST) | 0.0000001000000.0 | JC_Synth_SCX_4.3431.3431.2.dta |
| GPSGXVSAQQLXR 2 1 9 1 440  | 1 | 715.815  | 1429.616 | 2 | 46.31 | 8.20E-05 | GPSGEVSAQQLYK | Phospho (ST) | 0.0000001000000.0 | JC_Synth_SCX_4.2154.2154.2.dta |
| GPSGXVSAQQLXR 6 2 6 0 1253 | 1 | 677.8049 | 1353.595 | 2 | 60.11 | 1.90E-06 | GPSGVSQAQLSR  | Phospho (ST) | 0.0000001000000.0 | JC_Synth_SCX_4.1865.1865.2.dta |
| GPSGXVSAQQLXR 2 1 1 0 423  | 1 | 705.8    | 1409.585 | 2 | 71.54 | 1.20E-07 | GPSGEVSAQQLDR | Phospho (ST) | 0.0000001000000.0 | JC_Synth_SCX_4.1999.1999.2.dta |
| GPSGXVSAQQLXR 5 3 9 0 1079 | 1 | 737.8597 | 1473.705 | 2 | 55.27 | 1.90E-05 | GPSGLVSAQQLYR | Phospho (ST) | 0.0000001000000.0 | JC_Synth_SCX_4.3200.3200.2.dta |
| GPSGXVSAQQLXR 2 3 1 0 463  | 1 | 721.8208 | 1441.627 | 2 | 66.58 | 7.10E-07 | GPSGEVSAQQLDR | Phospho (ST) | 0.0000001000000.0 | JC_Synth_SCX_4.2583.2583.2.dta |
| GPSGXVSAQQLXR 2 2 6 0 453  | 1 | 698.8104 | 1395.606 | 2 | 57.96 | 8.90E-06 | GPSGEVSAQQLSR | Phospho (ST) | 0.0000001000000.0 | JC_Synth_SCX_4.1908.1908.2.dta |
| GPSGXVSAQQLXR 6 3 3 0 1267 | 1 | 716.8364 | 1431.658 | 2 | 53.03 | 1.30E-05 | GPSGVSQAQLFR  | Phospho (ST) | 0.0000001000000.0 | JC_Synth_SCX_4.3240.3240.2.dta |
| GPSGXVSAQQLXR 9 0 3 0 1807 | 1 | 716.8364 | 1431.658 | 2 | 53.71 | 1.10E-05 | GPSGVVSAQQLFR | Phospho (ST) | 0.0000001000000.0 | JC_Synth_SCX_4.2922.2922.2.dta |
| GPSGXVSAQQLXR 4 3 9 0 879  | 1 | 709.8286 | 1417.643 | 2 | 55.14 | 6.70E-06 | GPSGVSQAQLYR  | Phospho (ST) | 0.0000001000000.0 | JC_Synth_SCX_4.2800.2800.2.dta |
| GPSGXVSAQQLXR 4 4 3 1 888  | 1 | 642.8044 | 1283.594 | 2 | 50.45 | 3.10E-05 | GPSGVSQAQLFK  | Phospho (ST) | 0.0000001000000.0 | JC_Synth_SCX_4.2514.2514.2.dta |
| GPSGXVSAQQLXR 0 6 8 0 137  | 1 | 654.8207 | 1307.627 | 2 | 77.56 | 4.70E-08 | GPSGAVSAQQLVR | Phospho (ST) | 0.0000001000000.0 | JC_Synth_SCX_4.2161.2161.2.dta |
| GPSGXVSAQQLXR 5 3 0 0 1061 | 1 | 691.8468 | 1381.679 | 2 |       |          |               |              |                   |                                |

|                            |   |          |          |   |       |          |                |              |                   |                                |
|----------------------------|---|----------|----------|---|-------|----------|----------------|--------------|-------------------|--------------------------------|
| GPSGXVSAQQLR 9 5 5 0 1911  | 1 | 720.8682 | 1439.722 | 2 | 76.38 | 4.80E-08 | GPSGVVSLAQLLR  | Phospho (ST) | 0.0000001000000.0 | JC_Synth_SCX_4.3335.3335.2.dta |
| GPSGXVSAQQLR 6 5 5 0 1311  | 1 | 682.8525 | 1363.69  | 2 | 53.69 | 1.60E-05 | GPSGVVSLAQLLR  | Phospho (ST) | 0.0000001000000.0 | JC_Synth_SCX_4.3103.3103.2.dta |
| GPSGXVSAQQLR 3 3 9 0 1679  | 1 | 754.8527 | 1507.691 | 2 | 55.36 | 7.00E-06 | GPSGVVSLAQLLR  | Phospho (ST) | 0.0000001000000.0 | JC_Synth_SCX_4.3226.3226.2.dta |
| GPSGXVSAQQLR 3 3 9 0 1639  | 1 | 738.8319 | 1475.649 | 2 | 60.75 | 2.40E-06 | GPSGVVSDAQLYR  | Phospho (ST) | 0.0000001000000.0 | JC_Synth_SCX_4.2641.2641.2.dta |
| GPSGXVSAQQLR 5 3 2 1 1066  | 1 | 706.8469 | 1411.679 | 2 | 41.73 | 0.00035  | GPSGLVSAQLEK   | Phospho (ST) | 0.0000001000000.0 | JC_Synth_SCX_4.2985.2985.2.dta |
| GPSGXVSAQQLR 3 0 0 0 1601  | 1 | 706.8237 | 1339.633 | 2 | 63.14 | 1.40E-06 | GPSGVVSAQQLR   | Phospho (ST) | 0.0000001000000.0 | JC_Synth_SCX_4.2593.2593.2.dta |
| GPSGXVSAQQLR 0 8 5 0 171   | 1 | 667.8472 | 1333.68  | 2 | 66.8  | 4.10E-07 | GPSGAVSLAQLLR  | Phospho (ST) | 0.0000001000000.0 | JC_Synth_SCX_4.2943.2943.2.dta |
| GPSGXVSAQQLR 6 5 5 1 1312  | 1 | 668.8494 | 1335.684 | 2 | 32.64 | 0.0003   | GPSGLVSAQLLK   | Phospho (ST) | 0.0000001000000.0 | JC_Synth_SCX_4.3071.3071.2.dta |
| GPSGXVSAQQLR 3 2 8 0 1657  | 1 | 713.8423 | 1425.67  | 2 | 61.94 | 2.50E-06 | GPSGVVSDAQLYR  | Phospho (ST) | 0.0000001000000.0 | JC_Synth_SCX_4.2698.2698.2.dta |
| GPSGXVSAQQLR 1 1 9 1 240   | 1 | 708.8081 | 1415.602 | 2 | 47.14 | 4.30E-05 | GPSGDVSDAQLYK  | Phospho (ST) | 0.0000001000000.0 | JC_Synth_SCX_4.2145.2145.2.dta |
| GPSGXVSAQQLR 3 8 4 0 769   | 1 | 677.8317 | 1353.649 | 2 | 45.1  | 0.00014  | GPSGVVSAQQLGR  | Phospho (ST) | 0.0000001000000.0 | JC_Synth_SCX_4.2771.2771.2.dta |
| GPSGXVSAQQLR 3 0 9 0 1619  | 1 | 716.837  | 1431.66  | 2 | 72.83 | 1.30E-07 | GPSGVVSAQQLYR  | Phospho (ST) | 0.0000001000000.0 | JC_Synth_SCX_4.2761.2761.2.dta |
| GPSGXVSAQQLR 3 2 9 0 1659  | 1 | 745.84   | 1489.665 | 2 | 60.22 | 2.90E-06 | GPSGVVSDAQLYR  | Phospho (ST) | 0.0000001000000.0 | JC_Synth_SCX_4.2697.2697.2.dta |
| GPSGXVSAQQLR 1 9 0 0 381   | 1 | 700.8163 | 1399.618 | 2 | 51.8  | 3.10E-05 | GPSGDVSYAQLAR  | Phospho (ST) | 0.0000001000000.0 | JC_Synth_SCX_4.2303.2303.2.dta |
| GPSGXVSAQQLR 5 3 4 0 1069  | 1 | 684.8395 | 1367.665 | 2 | 47.2  | 8.00E-05 | GPSGLVSAQQLGR  | Phospho (ST) | 0.0000001000000.0 | JC_Synth_SCX_4.3012.3012.2.dta |
| GPSGXVSAQQLR 5 3 5 0 1071  | 1 | 712.871  | 1423.727 | 2 | 47.67 | 1.70E-05 | GPSGLVSAQQLR   | Phospho (ST) | 0.0000001000000.0 | JC_Synth_SCX_4.3535.3535.2.dta |
| GPSGXVSAQQLR 6 0 4 0 1209  | 1 | 422.8676 | 1265.581 | 3 | 40.86 | 0.00011  | GPSGVVSAQQLGR  | Phospho (ST) | 0.0000001000000.0 | JC_Synth_SCX_4.1882.1882.3.dta |
| GPSGXVSAQQLR 2 0 2 0 405   | 1 | 690.8138 | 1379.613 | 2 | 52.65 | 6.40E-05 | GPSGEVSAQQLR   | Phospho (ST) | 0.0000001000000.0 | JC_Synth_SCX_4.2071.2071.2.dta |
| GPSGXVSAQQLR 5 9 0 0 1019  | 1 | 699.8449 | 1397.675 | 2 | 58.52 | 3.80E-06 | GPSGLVSAQQLYR  | Phospho (ST) | 0.0000001000000.0 | JC_Synth_SCX_4.2719.2719.2.dta |
| GPSGXVSAQQLR 0 4 8 0 197   | 1 | 639.816  | 1277.617 | 2 | 45.27 | 4.00E-05 | GPSGAVSQAQLYR  | Phospho (ST) | 0.0000001000000.0 | JC_Synth_SCX_4.2164.2164.2.dta |
| GPSGXVSAQQLR 1 4 9 0 299   | 1 | 693.8086 | 1385.603 | 2 | 63.86 | 1.50E-06 | GPSGDVSGAQLYR  | Phospho (ST) | 0.0000001000000.0 | JC_Synth_SCX_4.2159.2159.2.dta |
| GPSGXVSAQQLR 9 5 5 1 1912  | 1 | 706.8654 | 1411.716 | 2 | 37.01 | 0.00081  | GPSGVVSLAQLLK  | Phospho (ST) | 0.0000001000000.0 | JC_Synth_SCX_4.3304.3304.2.dta |
| GPSGXVSAQQLR 9 7 3 0 1947  | 1 | 731.8426 | 1461.671 | 2 | 70.24 | 3.40E-07 | GPSGVVSTAQLFR  | Phospho (ST) | 0.0000001000000.0 | JC_Synth_SCX_4.2818.2818.2.dta |
| GPSGXVSAQQLR 6 8 3 1 1368  | 1 | 678.8341 | 1355.654 | 2 | 47.23 | 9.10E-05 | GPSGLVSAQQLFK  | Phospho (ST) | 0.0000001000000.0 | JC_Synth_SCX_4.2962.2962.2.dta |
| GPSGXVSAQQLR 5 9 9 0 1199  | 1 | 745.8583 | 1489.702 | 2 | 53.62 | 1.30E-05 | GPSGLVSYAQLYR  | Phospho (ST) | 0.0000001000000.0 | JC_Synth_SCX_4.2896.2896.2.dta |
| GPSGXVSAQQLR 0 2 8 0 157   | 1 | 675.8268 | 1349.639 | 2 | 60.63 | 4.90E-06 | GPSGAVSQAQLYR  | Phospho (ST) | 0.0000001000000.0 | JC_Synth_SCX_4.2256.2256.2.dta |
| GPSGXVSAQQLR 3 3 3 0 1667  | 1 | 746.8557 | 1491.697 | 2 | 58.91 | 2.90E-06 | GPSGVVSAQQLFR  | Phospho (ST) | 0.0000001000000.0 | JC_Synth_SCX_4.3667.3667.2.dta |
| GPSGXVSAQQLR 3 4 3 0 1687  | 1 | 710.832  | 1401.65  | 2 | 34.11 | 0.00082  | GPSGLVSAQQLFR  | Phospho (ST) | 0.0000001000000.0 | JC_Synth_SCX_4.2955.2955.2.dta |
| GPSGXVSAQQLR 3 1 5 0 1631  | 1 | 713.8427 | 1425.671 | 2 | 84.56 | 1.40E-08 | GPSGVVSDAQLLR  | Phospho (ST) | 0.0000001000000.0 | JC_Synth_SCX_4.2863.2863.2.dta |
| GPSGXVSAQQLR 9 2 9 1 1860  | 1 | 739.8346 | 1477.655 | 2 | 46.42 | 0.00012  | GPSGVVSEAQLYK  | Phospho (ST) | 0.0000001000000.0 | JC_Synth_SCX_4.2419.2419.2.dta |
| GPSGXVSAQQLR 5 3 8 0 1077  | 1 | 705.8634 | 1409.712 | 2 | 63.28 | 1.20E-06 | GPSGLVSAQQLYR  | Phospho (ST) | 0.0000001000000.0 | JC_Synth_SCX_4.3290.3290.2.dta |
| GPSGXVSAQQLR 3 4 0 0 1681  | 1 | 663.8163 | 1325.618 | 2 | 75.07 | 5.10E-08 | GPSGVVSGAQLAR  | Phospho (ST) | 0.0000001000000.0 | JC_Synth_SCX_4.2415.2415.2.dta |
| GPSGXVSAQQLR 5 5 8 0 1117  | 1 | 688.8712 | 1375.728 | 2 | 66.33 | 3.80E-07 | GPSGLVLAQLYR   | Phospho (ST) | 0.0000001000000.0 | JC_Synth_SCX_4.3313.3313.2.dta |
| GPSGXVSAQQLR 4 3 3 0 1867  | 1 | 701.8321 | 1401.65  | 2 | 71.62 | 1.40E-07 | GPSGVVSTAQLFR  | Phospho (ST) | 0.0000001000000.0 | JC_Synth_SCX_4.3277.3277.2.dta |
| GPSGXVSAQQLR 1 9 3 1 388   | 1 | 724.8293 | 1447.644 | 2 | 42.87 | 0.00041  | GPSGDVSYAQLFK  | Phospho (ST) | 0.0000001000000.0 | JC_Synth_SCX_4.2856.2856.2.dta |
| GPSGXVSAQQLR 5 0 5 1 1012  | 1 | 660.8524 | 1319.69  | 2 | 53.83 | 7.90E-06 | GPSGLVSAQQLK   | Phospho (ST) | 0.0000001000000.0 | JC_Synth_SCX_4.2992.2992.2.dta |
| GPSGXVSAQQLR 2 5 8 0 1517  | 1 | 696.8505 | 1391.687 | 2 | 58.39 | 6.70E-06 | GPSGEVLAQLYR   | Phospho (ST) | 0.0000001000000.0 | JC_Synth_SCX_4.2884.2884.2.dta |
| GPSGXVSAQQLR 9 9 9 0 1999  | 1 | 770.8483 | 1539.682 | 2 | 58.58 | 4.00E-06 | GPSGVVSYAQLYR  | Phospho (ST) | 0.0000001000000.0 | JC_Synth_SCX_4.2671.2671.2.dta |
| GPSGXVSAQQLR 6 9 4 1 1390  | 1 | 665.8082 | 1329.602 | 2 | 49.18 | 8.50E-05 | GPSGLVSYAQLGK  | Phospho (ST) | 0.0000001000000.0 | JC_Synth_SCX_4.2183.2183.2.dta |
| GPSGXVSAQQLR 5 3 1 0 1063  | 1 | 713.8375 | 1425.661 | 2 | 43.74 | 0.00012  | GPSGLVSAQQLDR  | Phospho (ST) | 0.0000001000000.0 | JC_Synth_SCX_5.2986.2986.2.dta |
| GPSGXVSAQQLR 3 4 6 0 1693  | 1 | 671.809  | 1341.603 | 2 | 34.09 | 2.00E-07 | GPSGVVSGAQLSR  | Phospho (ST) | 0.0000001000000.0 | JC_Synth_SCX_5.2358.2358.2.dta |
| GPSGXVSAQQLR 1 4 1 0 283   | 1 | 669.7859 | 1337.557 | 2 | 65.51 | 0.00017  | GPSGDVSGAQLDR  | Phospho (ST) | 0.0000001000000.0 | JC_Synth_SCX_5.1979.1979.2.dta |
| GPSGXVSAQQLR 9 9 6 0 1939  | 1 | 732.8278 | 1463.641 | 2 | 53.43 | 3.00E-05 | GPSGVVSAQQLYR  | Phospho (ST) | 0.0000001000000.0 | JC_Synth_SCX_5.2361.2361.2.dta |
| GPSGXVSAQQLR 9 1 6 0 1833  | 1 | 708.8101 | 1415.606 | 2 | 62.53 | 3.40E-06 | GPSGVVSDAQLSR  | Phospho (ST) | 0.0000001000000.0 | JC_Synth_SCX_5.2161.2161.2.dta |
| GPSGXVSAQQLR 9 4 6 0 1893  | 1 | 679.8077 | 1357.601 | 2 | 66.3  | 1.00E-06 | GPSGVVSGAQLSR  | Phospho (ST) | 0.0000001000000.0 | JC_Synth_SCX_5.2129.2129.2.dta |
| GPSGXVSAQQLR 9 3 1 1 1864  | 1 | 724.8266 | 1447.639 | 2 | 33.5  | 0.00027  | GPSGVVSAQQLDK  | Phospho (ST) | 0.0000001000000.0 | JC_Synth_SCX_5.2694.2694.2.dta |
| GPSGXVSAQQLR 9 5 6 0 1913  | 1 | 707.84   | 1413.666 | 2 | 41.62 | 0.00028  | GPSGVVSLAQLSR  | Phospho (ST) | 0.0000001000000.0 | JC_Synth_SCX_5.2705.2705.2.dta |
| SXPFKXSPFLXFR 7 1 4 1 1430 | 1 | 487.5656 | 1459.675 | 3 | 35.77 | 0.00017  | STPFKDSPLFGFK  | Phospho (ST) | 0.0000001000000.0 | JC_Synth_SCX_5.2444.2444.3.dta |
| SXPFKXSPFLXFR 2 5 2 1 506  | 1 | 779.8815 | 1557.749 | 2 | 20.61 | 0.014    | SEPFKLSPLFGFK  | Phospho (ST) | 0.0000001000000.0 | JC_Synth_SCX_5.2908.2908.2.dta |
| GPSGXVSAQQLR 6 4 8 0 1297  | 1 | 647.8116 | 1293.609 | 2 | 77.81 | 9.40E-08 | GPSGVVSGAQLYR  | Phospho (ST) | 0.0000001000000.0 | JC_Synth_SCX_5.2138.2138.2.dta |
| GPSGXVSAQQLR 5 4 4 0 1089  | 1 | 639.8141 | 1277.614 | 2 | 59.63 | 1.20E-05 | GPSGLVSAQQLGR  | Phospho (ST) | 0.0000001000000.0 | JC_Synth_SCX_5.2339.2339.2.dta |
| SXPFKXSPFLXFR 7 8 6 1 1574 | 1 | 492.2499 | 1473.728 | 3 | 39.31 | 0.00046  | STPFKVSPLFGFK  | Phospho (ST) | 0.0000001000000.0 | JC_Synth_SCX_5.2730.2730.3.dta |
| GPSGXVSAQQLR 4 6 0 0 1921  | 1 | 633.796  | 1265.578 | 2 | 50.83 | 7.10E-05 | GPSGVVSSAQLAR  | Phospho (ST) | 0.0000001000000.0 | JC_Synth_SCX_5.2009.2009.2.dta |
| GPSGXVSAQQLR 1 0 5 0 211   | 1 | 675.8249 | 1349.635 | 2 | 50.16 | 3.80E-05 | GPSGVVSAQQLLR  | Phospho (ST) | 0.0000001000000.0 | JC_Synth_SCX_5.2555.2555.2.dta |
| SXPFKXSPFLXFR 5 2 2 1 1106 | 1 | 771.9027 | 1541.791 | 2 | 24.33 | 0.00077  | SPLFGKLSPLFGFK | Phospho (ST) | 0.0000001000000.0 | JC_Synth_SCX_5.3131.3131.2.dta |
| GPSGXVSAQQLR 8 5 3 0 1707  | 1 | 705.8613 | 1409.708 | 2 | 43.92 | 4.90E-05 | GPSGVVSLAQLFR  | Phospho (ST) | 0.0000001000000.0 | JC_Synth_SCX_5.3465.3465.2.dta |
| GPSGXVSAQQLR 3 6 1 0 723   | 1 | 700.8146 | 1399.615 | 2 | 25.52 | 0.013    | GPSGVVSAQQLDR  | Phospho (ST) | 0.0000001000000.0 | JC_Synth_SCX_5.2403.2403.2.dta |
| GPSGXVSAQQLR 9 0 5 0 1811  | 1 | 699.8431 | 1397.672 | 2 | 45    | 8.50E-05 | GPSGVVSAQQLLR  | Phospho (ST) | 0.0000001000000.0 | JC_Synth_SCX_5.2778.2778.2.dta |
| GPSGXVSAQQLR 5 0 5 0 1011  | 1 | 674.8535 | 1347.693 | 2 | 65    | 3.20E-07 | GPSGLVSAQQLR   | Phospho (ST) | 0.0000001000000.0 | JC_Synth_SCX_5.3010.3010.2.dta |
| SXPFKXSPFLXFR 2 2 2 1 446  | 1 | 787.8614 | 1573.708 | 2 | 22.92 | 0.00082  | SEPFKESPLFGFK  | Phospho (ST) | 0.0000001000000.0 | JC_Synth_SCX_5.2462.2462.2.dta |
| GPSGXVSAQQLR 3 0 5 0 1611  | 1 | 691.8458 | 1381.677 | 2 | 29.29 | 0.00018  | GPSGVVSAQQLLR  | Phospho (ST) | 0.0000001000000.0 | JC_Synth_SCX_5.3046.3046.2.dta |
| GPSGXVSAQQLR 5 3 3 0 1107  | 1 | 712.8694 | 1423.724 | 2 | 44.49 | 3.60E-05 | GPSGLVSAQQLFR  | Phospho (ST) | 0.0000001000000.0 | JC_Synth_SCX_5.3652.3652.2.dta |
| GPSGXVSAQQLR 1 4 9 0 299   | 1 | 693.8071 | 1385.6   | 2 | 45.85 | 9.80E-05 | GPSGDVSGAQLYR  | Phospho (ST) | 0.0000001000000.0 | JC_Synth_SCX_5.2171.2171.2.dta |
| GPSGXVSAQQLR 6 5 8 1 1318  | 1 | 661.8404 | 1321.666 | 2 | 41.26 | 0.00042  | GPSGLVSAQQLVK  | Phospho (ST) | 0.0000001000000.0 | JC_Synth_SCX_5.2789.2789.2.dta |
| GPSGXVSAQQLR 5 8 3 1 1168  | 1 | 691.8586 | 1381.703 | 2 | 47.61 | 6.20E-05 | GPSGLVSAQQLFK  | Phospho (ST) | 0.0000001000000.0 | JC_Synth_SCX_5.3378.3378.2.dta |
| GPSGXVSAQQLR 0 5 3 1 108   | 1 | 677.843  | 1353.672 | 2 | 43.95 | 0.00015  | GPSGAVSQAQLFK  | Phospho (ST) | 0.0000001000000.0 | JC_Synth_SCX_5.3244.3244.2.dta |
| GPSGXVSAQQLR 2 2 9 0 459   | 1 | 736.8256 | 1471.637 | 2 | 52.4  | 3.20E-05 | GPSGEVSEAQLYR  | Phospho (ST) | 0.0000001000000.0 | JC_Synth_SCX_5.2254.2254.2.dta |
| GPSGXVSAQQLR 1 9 1 0 383   | 1 | 722.81   | 1443.605 | 2 | 43.73 | 0.00015  | GPSGDVSYAQLDR  | Phospho (ST) | 0.0000001000000.0 | JC_Synth_SCX_5.2188.2188.2.dta |
| GPSGXVSAQQLR 5 0 0 0 1001  | 1 | 653.8304 | 1305.646 | 2 | 53.24 | 4.70E-06 | GPSGLVSAQQLAR  | Phospho (ST) | 0.0000001000000.0 | JC_Synth_SCX_5.2557.2557.2.dta |
| SXPFKXSPFLXFR 2 8 7 1 576  | 1 | 506.2539 | 1515.74  | 3 | 34.95 | 0.00013  | SEPFKVSPLTFGK  | Phospho (ST) | 0.0000001000000.0 | JC_Synth_SCX_5.2732.2732.3.dta |
| GPSGXVSAQQLR 3 5 4 0 709   | 1 | 684.8384 | 1367.662 | 2 | 40.48 | 0.00038  | GPSGVVSAQQLGR  | Phospho (ST) | 0.0000001000000.0 | JC_Synth_SCX_5.2993.2993.2.dta |
| GPSGXVSAQQLR 9 5 3 0 1907  | 1 | 737.8594 | 1473.704 | 2 | 45.2  | 0.00011  | GPSGVVSLAQLFR  | Phospho (ST) | 0.0000001000000.0 | JC_Synth_SCX_5.3410.3410.2.dta |
| GPSGXVSAQQLR 2 1 1 0 423   | 1 | 705.7997 | 1409.585 | 2 | 53.18 | 1.60E-05 | GPSGEVSDAQLDR  | Phospho (ST) | 0.0000001000000.0 | JC_Synth_SCX_5.2014.2014.2.dta |
| SXPFKXSPFLXFR 2 2 5 1 452  | 1 | 520.2575 | 1557.751 | 3 | 55.35 | 5.50E-06 | SEPFKESPLTFGK  | Phospho (ST) | 0.0000001000000.0 | JC_Synth_SCX_5.2657.2657.3.dta |
| GPSGXVSAQQLR 3 5 6 1 714   | 1 | 685.8406 | 1369.667 | 2 | 29.86 | 0.00054  | GPSGVVSLAQLSK  | Phospho (ST) | 0.0000001000000.0 | JC_Synth_SCX_5.2931.2931.2.dta |
| GPSGXVSAQQLR 5 3 5 0 1071  | 1 | 712.8698 | 1423.725 | 2 | 69.85 | 1.00E-07 | GPSGLVSAQQLLR  | Phospho (ST) | 0.0000001000000.0 | JC_Synth_SCX_5.3514.3514.2.dta |
| SXPFKXSPFLXFR 6 8 0 1 1362 | 1 | 482.2469 | 1443.719 | 3 | 35.08 | 0.00013  | SXPFKVSPLAFGK  | Phospho (ST) | 0.0000001000000.0 | JC_Synth_SCX_5.2723.2723.3.dta |
| GPSGXVSAQQLR 9 4           |   |          |          |   |       |          |                |              |                   |                                |

|                            |   |          |          |   |       |          |                |              |                   |                                |
|----------------------------|---|----------|----------|---|-------|----------|----------------|--------------|-------------------|--------------------------------|
| GPSGXVSAQXLR 2 1 5 0 431   | 1 | 704.8286 | 1407.643 | 2 | 44.68 | 0.00042  | GPSGEVSDAQLLR  | Phospho (ST) | 0.0000001000000.0 | JC_Synth_SCX_5.2394.2394.2.dta |
| GPSGXVSAQXLR 5 2 5 0 1041  | 1 | 682.8336 | 1363.653 | 2 | 46.08 | 0.00012  | GPSGLVSEAQLAR  | Phospho (ST) | 0.0000001000000.0 | JC_Synth_SCX_5.2481.2481.2.dta |
| GPSGXVSAQXLR 5 2 5 0 1051  | 1 | 703.8571 | 1405.7   | 2 | 23.67 | 0.017    | GPSGLVSEAQLLR  | Phospho (ST) | 0.0000001000000.0 | JC_Synth_SCX_5.2879.2879.2.dta |
| GPSGXVSAQXLR 9 1 9 0 1839  | 1 | 746.8287 | 1491.643 | 2 | 50.15 | 4.00E-05 | GPSGVVSDAQLYR  | Phospho (ST) | 0.0000001000000.0 | JC_Synth_SCX_5.2395.2395.2.dta |
| SXPFKXSPXLFGR 0 0 0 1 2    | 1 | 467.5717 | 1399.693 | 3 | 29.14 | 0.0031   | SAPFKASPLAFGK  | Phospho (ST) | 0.0000001000000.0 | JC_Synth_SCX_5.2487.2487.3.dta |
| SXPFKXSPXLFGR 6 8 1 1 1364 | 1 | 496.9104 | 1487.71  | 3 | 48.84 | 5.30E-05 | SSPFKVSPLDFGK  | Phospho (ST) | 0.0000001000000.0 | JC_Synth_SCX_5.2785.2785.3.dta |
| GPSGXVSAQXLR 2 4 5 0 491   | 1 | 675.8258 | 1349.637 | 2 | 50.06 | 5.50E-05 | GPSGEVSGAQLLR  | Phospho (ST) | 0.0000001000000.0 | JC_Synth_SCX_5.2393.2393.2.dta |
| GPSGXVSAQXLR 0 5 6 1 114   | 1 | 647.8252 | 1293.636 | 2 | 44.6  | 0.00017  | GPSGAVSLAQLSK  | Phospho (ST) | 0.0000001000000.0 | JC_Synth_SCX_5.2483.2483.2.dta |
| GPSGXVSAQXLR 0 7 6 1 154   | 1 | 641.8007 | 1281.6   | 2 | 28.53 | 0.0057   | GPSGAVSTAQLSK  | Phospho (ST) | 0.0000001000000.0 | JC_Synth_SCX_5.2005.2005.2.dta |
| SXPFKXSPXLFGR 4 1 8 1 838  | 1 | 486.9069 | 1457.699 | 3 | 27.13 | 0.0085   | SGPFKDSPLVFGK  | Phospho (ST) | 0.0000001000000.0 | JC_Synth_SCX_5.2787.2787.3.dta |
| GPSGXVSAQXLR 2 1 9 0 439   | 1 | 729.8183 | 1457.622 | 2 | 55.45 | 7.30E-06 | GPSGEVSDAQLYR  | Phospho (ST) | 0.0000001000000.0 | JC_Synth_SCX_5.2197.2197.2.dta |
| GPSGXVSAQXLR 0 2 4 0 49    | 1 | 654.8023 | 1307.59  | 2 | 59.44 | 6.30E-06 | GPSGAVSEAQLGR  | Phospho (ST) | 0.0000001000000.0 | JC_Synth_SCX_5.2065.2065.2.dta |
| SXPFKXSPXLFGR 2 6 1 1 524  | 1 | 506.9019 | 1517.684 | 3 | 48.07 | 3.30E-05 | SEPFKSPDLDFGK  | Phospho (ST) | 0.0000001000000.0 | JC_Synth_SCX_5.2474.2474.3.dta |
| GPSGXVSAQXLR 9 4 0 0 1881  | 1 | 671.8127 | 1341.611 | 2 | 45.52 | 5.90E-05 | GPSGVVSGAQLAR  | Phospho (ST) | 0.0000001000000.0 | JC_Synth_SCX_5.2177.2177.2.dta |
| GPSGXVSAQXLR 0 3 0 0 7     | 1 | 670.8231 | 1339.632 | 2 | 31.42 | 0.0023   | GPSGAVSAAQLFR  | Phospho (ST) | 0.0000001000000.0 | JC_Synth_SCX_5.2739.2739.2.dta |
| SXPFKXSPXLFGR 2 2 8 1 458  | 1 | 515.5859 | 1543.736 | 3 | 42.09 | 0.00047  | SEPFKESPLVFGK  | Phospho (ST) | 0.0000001000000.0 | JC_Synth_SCX_5.2533.2533.3.dta |
| GPSGXVSAQXLR 3 3 5 0 671   | 1 | 729.8624 | 1457.71  | 2 | 29.82 | 0.0027   | GPSGFVSAQLLR   | Phospho (ST) | 0.0000001000000.0 | JC_Synth_SCX_5.3535.3535.2.dta |
| SXPFKXSPXLFGR 5 2 5 1 1052 | 1 | 514.9383 | 1541.793 | 3 | 34.28 | 0.0011   | SLPFKESPLVFGK  | Phospho (ST) | 0.0000001000000.0 | JC_Synth_SCX_5.3132.3132.3.dta |
| SXPFKXSPXLFGR 1 1 1 1 224  | 1 | 511.5617 | 1531.663 | 3 | 42.91 | 0.00016  | SDPFKDSPLDFGK  | Phospho (ST) | 0.0000001000000.0 | JC_Synth_SCX_5.2604.2604.3.dta |
| GPSGXVSAQXLR 9 1 8 0 1837  | 1 | 714.8313 | 1427.648 | 2 | 27.33 | 0.0093   | GPSGVVSDAQLYR  | Phospho (ST) | 0.0000001000000.0 | JC_Synth_SCX_5.2389.2389.2.dta |
| SXPFKXSPXLFGR 5 6 0 1 1122 | 1 | 486.9191 | 1457.736 | 3 | 33.81 | 0.0018   | SLPFKSPPLAFGK  | Phospho (ST) | 0.0000001000000.0 | JC_Synth_SCX_5.2650.2650.3.dta |
| GPSGXVSAQXLR 9 2 5 0 1851  | 1 | 728.847  | 1455.679 | 2 | 31.51 | 0.0022   | GPSGVVSEAQLLR  | Phospho (ST) | 0.0000001000000.0 | JC_Synth_SCX_5.2659.2659.2.dta |
| GPSGXVSAQXLR 2 5 5 0 511   | 1 | 703.8573 | 1405.7   | 2 | 56.17 | 9.40E-06 | GPSGEVSLAQLLR  | Phospho (ST) | 0.0000001000000.0 | JC_Synth_SCX_5.3146.3146.2.dta |
| GPSGXVSAQXLR 6 3 8 0 1277  | 1 | 692.8364 | 1383.658 | 2 | 32.07 | 0.0017   | GPSGSVSAQLYR   | Phospho (ST) | 0.0000001000000.0 | JC_Synth_SCX_5.2834.2834.2.dta |
| SXPFKXSPXLFGR 5 2 0 1 1042 | 1 | 590.9227 | 1499.746 | 3 | 34.51 | 0.0016   | SLPFKESPLAFGK  | Phospho (ST) | 0.0000001000000.0 | JC_Synth_SCX_5.2761.2761.3.dta |
| SXPFKXSPXLFGR 7 5 2 1 1506 | 1 | 510.9262 | 1529.757 | 3 | 50.84 | 2.10E-05 | STPFKSPLEFGK   | Phospho (ST) | 0.0000001000000.0 | JC_Synth_SCX_5.2906.2906.3.dta |
| GPSGXVSAQXLR 3 9 5 0 719   | 1 | 737.86   | 1473.705 | 2 | 47.7  | 4.60E-05 | GPSGFVSLAQLYR  | Phospho (ST) | 0.0000001000000.0 | JC_Synth_SCX_5.3185.3185.2.dta |
| GPSGXVSAQXLR 5 0 7 1 1016  | 1 | 654.8333 | 1307.652 | 2 | 41.99 | 0.00027  | GPSGLVSAQLTK   | Phospho (ST) | 0.0000001000000.0 | JC_Synth_SCX_5.2502.2502.2.dta |
| SXPFKXSPXLFGR 5 5 6 1 1114 | 1 | 750.8986 | 1499.783 | 2 | 25.98 | 0.0061   | SLPFKSPPLDFGK  | Phospho (ST) | 0.0000001000000.0 | JC_Synth_SCX_5.3121.3121.2.dta |
| SXPFKXSPXLFGR 4 8 5 1 972  | 1 | 486.2594 | 1455.756 | 3 | 50.91 | 2.90E-05 | SGPFKVSPLDFGK  | Phospho (ST) | 0.0000001000000.0 | JC_Synth_SCX_5.2955.2955.3.dta |
| GPSGXVSAQXLR 5 5 8 0 1117  | 1 | 688.8702 | 1375.726 | 2 | 60.67 | 1.70E-06 | GPSGLVSLAQLYR  | Phospho (ST) | 0.0000001000000.0 | JC_Synth_SCX_5.3295.3295.2.dta |
| SXPFKXSPXLFGR 0 8 4 1 170  | 1 | 472.2437 | 1413.709 | 3 | 52.3  | 1.50E-05 | SAPFKVSPLDFGK  | Phospho (ST) | 0.0000001000000.0 | JC_Synth_SCX_5.2691.2691.3.dta |
| SXPFKXSPXLFGR 2 1 8 1 438  | 1 | 510.9142 | 1529.721 | 3 | 57.69 | 1.30E-05 | SEPFKDSPLVFGK  | Phospho (ST) | 0.0000001000000.0 | JC_Synth_SCX_5.2541.2541.3.dta |
| GPSGXVSAQXLR 2 2 2 0 445   | 1 | 719.816  | 1437.617 | 2 | 66.89 | 2.60E-06 | GPSGEVSEAQLER  | Phospho (ST) | 0.0000001000000.0 | JC_Synth_SCX_5.2075.2075.2.dta |
| SXPFKXSPXLFGR 2 5 1 1 504  | 1 | 515.5861 | 1543.736 | 3 | 63.55 | 3.20E-06 | SEPFKDSPLDFGK  | Phospho (ST) | 0.0000001000000.0 | JC_Synth_SCX_5.2946.2946.3.dta |
| GPSGXVSAQXLR 5 3 2 0 1065  | 1 | 720.8497 | 1439.685 | 2 | 38.82 | 0.00041  | GPSGLVSEAQLER  | Phospho (ST) | 0.0000001000000.0 | JC_Synth_SCX_5.2996.2996.2.dta |
| GPSGXVSAQXLR 5 1 1 0 1023  | 1 | 697.821  | 1393.628 | 2 | 33.96 | 0.005    | GPSGLVSDAQLDR  | Phospho (ST) | 0.0000001000000.0 | JC_Synth_SCX_5.2386.2386.2.dta |
| SXPFKXSPXLFGR 0 5 0 1 102  | 1 | 721.8777 | 1441.741 | 2 | 21.5  | 0.014    | SAPFKSPPLAFGK  | Phospho (ST) | 0.0000001000000.0 | JC_Synth_SCX_5.2882.2882.2.dta |
| SXPFKXSPXLFGR 9 5 1 1 1904 | 1 | 526.9264 | 1577.757 | 3 | 25.22 | 0.014    | SYPPFKSPLDFGK  | Phospho (ST) | 0.0000001000000.0 | JC_Synth_SCX_5.3047.3047.3.dta |
| SXPFKXSPXLFGR 0 0 8 1 18   | 1 | 476.9157 | 1427.725 | 3 | 52.77 | 1.30E-05 | SAPFKASPLVFGK  | Phospho (ST) | 0.0000001000000.0 | JC_Synth_SCX_5.2578.2578.3.dta |
| SXPFKXSPXLFGR 2 2 0 1 442  | 1 | 506.2424 | 1515.705 | 3 | 44.88 | 0.00021  | SEPFKESPLAFGK  | Phospho (ST) | 0.0000001000000.0 | JC_Synth_SCX_5.2452.2452.3.dta |
| SXPFKXSPXLFGR 1 2 1 1 244  | 1 | 516.2338 | 1545.68  | 3 | 44.71 | 0.00012  | SDPFKDSPLDFGK  | Phospho (ST) | 0.0000001000000.0 | JC_Synth_SCX_5.2605.2605.3.dta |
| GPSGXVSAQXLR 0 0 0 0 1     | 1 | 632.8077 | 1263.601 | 2 | 56.63 | 2.20E-06 | GPSGAVSAAQLAR  | Phospho (ST) | 0.0000001000000.0 | JC_Synth_SCX_5.2148.2148.2.dta |
| SXPFKXSPXLFGR 0 1 8 1 38   | 1 | 491.5791 | 1471.715 | 3 | 37.34 | 0.0015   | SAPFKVSPLVFGK  | Phospho (ST) | 0.0000001000000.0 | JC_Synth_SCX_5.2530.2530.3.dta |
| SXPFKXSPXLFGR 2 7 5 1 552  | 1 | 510.9264 | 1529.757 | 3 | 39.81 | 0.00027  | SEPFKSPPLDFGK  | Phospho (ST) | 0.0000001000000.0 | JC_Synth_SCX_5.2718.2718.3.dta |
| GPSGXVSAQXLR 6 8 6 1 1374  | 1 | 648.8153 | 1295.616 | 2 | 46.64 | 0.00012  | GPSGSVSAQLSK   | Phospho (ST) | 0.0000001000000.0 | JC_Synth_SCX_5.2196.2196.2.dta |
| GPSGXVSAQXLR 9 3 2 1 1866  | 1 | 731.8365 | 1461.658 | 2 | 32.08 | 0.0039   | GPSGFVSAQLER   | Phospho (ST) | 0.0000001000000.0 | JC_Synth_SCX_5.2763.2763.2.dta |
| GPSGXVSAQXLR 0 0 9 0 19    | 1 | 678.821  | 1355.627 | 2 | 41.11 | 0.00017  | GPSGAVSAAQLYR  | Phospho (ST) | 0.0000001000000.0 | JC_Synth_SCX_5.2329.2329.2.dta |
| GPSGXVSAQXLR 3 3 0 1 662   | 1 | 694.8362 | 1387.658 | 2 | 32.76 | 0.0035   | GPSGFVSAQLAK   | Phospho (ST) | 0.0000001000000.0 | JC_Synth_SCX_5.3070.3070.2.dta |
| SXPFKXSPXLFGR 0 0 6 1 14   | 1 | 708.8519 | 1415.689 | 2 | 33.02 | 0.003    | SAPFKASPLSFGK  | Phospho (ST) | 0.0000001000000.0 | JC_Synth_SCX_5.2489.2489.2.dta |
| SXPFKXSPXLFGR 4 2 0 1 842  | 1 | 482.2354 | 1443.684 | 3 | 35.1  | 0.0021   | SGPFKESPLAFGK  | Phospho (ST) | 0.0000001000000.0 | JC_Synth_SCX_5.2588.2588.3.dta |
| GPSGXVSAQXLR 9 5 5 0 1911  | 1 | 720.8682 | 1439.722 | 2 | 75.8  | 5.50E-08 | GPSGVVSLAQLLR  | Phospho (ST) | 0.0000001000000.0 | JC_Synth_SCX_5.3313.3313.2.dta |
| GPSGXVSAQXLR 0 9 0 1 182   | 1 | 664.818  | 1327.621 | 2 | 55.59 | 1.40E-05 | GPSGAVSQAQLAK  | Phospho (ST) | 0.0000001000000.0 | JC_Synth_SCX_5.2322.2322.2.dta |
| SXPFKXSPXLFGR 2 5 6 1 514  | 1 | 506.2547 | 1515.742 | 3 | 62.54 | 3.10E-06 | SEPFKSPPLSFGK  | Phospho (ST) | 0.0000001000000.0 | JC_Synth_SCX_5.2899.2899.3.dta |
| SXPFKXSPXLFGR 9 8 8 1 1978 | 1 | 516.9352 | 1547.784 | 3 | 27.54 | 0.0044   | SYPPFKVSPLVFGK | Phospho (ST) | 0.0000001000000.0 | JC_Synth_SCX_5.2939.2939.3.dta |
| GPSGXVSAQXLR 5 7 1 1 1144  | 1 | 676.8286 | 1351.643 | 2 | 39.86 | 0.00053  | GPSGLVSTAQLDK  | Phospho (ST) | 0.0000001000000.0 | JC_Synth_SCX_5.2369.2369.2.dta |
| GPSGXVSAQXLR 0 0 8 0 17    | 1 | 646.8236 | 1291.633 | 2 | 63.99 | 5.40E-07 | GPSGAVSAAQLYR  | Phospho (ST) | 0.0000001000000.0 | JC_Synth_SCX_5.2345.2345.2.dta |
| GPSGXVSAQXLR 9 4 0 1 1882  | 1 | 657.8103 | 1313.606 | 2 | 34.11 | 0.0024   | GPSGVVSGAQLAK  | Phospho (ST) | 0.0000001000000.0 | JC_Synth_SCX_5.2150.2150.2.dta |
| SXPFKXSPXLFGR 5 8 5 1 1172 | 1 | 504.9474 | 1511.82  | 3 | 66.97 | 3.10E-07 | SLPFKVSPLDFGK  | Phospho (ST) | 0.0000001000000.0 | JC_Synth_SCX_5.3201.3201.3.dta |
| GPSGXVSAQXLR 5 9 4 1 1190  | 1 | 678.8339 | 1355.653 | 2 | 27.55 | 0.0084   | GPSGLVSAQLGK   | Phospho (ST) | 0.0000001000000.0 | JC_Synth_SCX_5.2651.2651.2.dta |
| GPSGXVSAQXLR 3 5 8 0 717   | 1 | 705.8632 | 1409.712 | 2 | 67.38 | 2.20E-07 | GPSGFVSLAQLYR  | Phospho (ST) | 0.0000001000000.0 | JC_Synth_SCX_5.3308.3308.2.dta |
| GPSGXVSAQXLR 1 5 3 0 307   | 1 | 713.8427 | 1425.671 | 2 | 27.49 | 0.007    | GPSGDVSLAQLFR  | Phospho (ST) | 0.0000001000000.0 | JC_Synth_SCX_5.3206.3206.2.dta |
| GPSGXVSAQXLR 9 9 9 1 2000  | 1 | 756.845  | 1511.676 | 2 | 29.92 | 0.01     | GPSGVVSAQLYK   | Phospho (ST) | 0.0000001000000.0 | JC_Synth_SCX_5.2643.2643.2.dta |
| GPSGXVSAQXLR 5 2 5 1 1052  | 1 | 689.8552 | 1377.696 | 2 | 44.07 | 0.00018  | GPSGLVSEAQLLK  | Phospho (ST) | 0.0000001000000.0 | JC_Synth_SCX_5.2843.2843.2.dta |
| GPSGXVSAQXLR 3 3 1 1 664   | 1 | 716.8319 | 1431.649 | 2 | 31.63 | 0.0076   | GPSGFVSAQLDK   | Phospho (ST) | 0.0000001000000.0 | JC_Synth_SCX_5.3002.3002.2.dta |
| SXPFKXSPXLFGR 0 2 6 0 53   | 1 | 501.5709 | 1501.691 | 3 | 44.49 | 0.00032  | SAPFKASPLSFGK  | Phospho (ST) | 0.0000001000000.0 | JC_Synth_SCX_6.2555.2555.3.dta |
| SXPFKXSPXLFGR 0 0 7 0 15   | 1 | 486.9078 | 1457.702 | 3 | 49.15 | 7.50E-05 | SAPFKASPLTFGR  | Phospho (ST) | 0.0000001000000.0 | JC_Synth_SCX_6.2451.2451.3.dta |
| SXPFKXSPXLFGR 9 3 2 1 1866 | 1 | 813.8814 | 1625.748 | 2 | 25.01 | 0.0066   | SYPPFKSPLEFGK  | Phospho (ST) | 0.0000001000000.0 | JC_Synth_SCX_6.2958.2958.2.dta |
| SXPFKXSPXLFGR 8 0 1 0 1603 | 1 | 500.9117 | 1499.713 | 3 | 38.48 | 0.0011   | SYPPFKASPLDFGR | Phospho (ST) | 0.0000001000000.0 | JC_Synth_SCX_6.2733.2733.3.dta |
| SXPFKXSPXLFGR 5 0 1 0 1003 | 1 | 757.8718 | 1513.729 | 2 | 46.89 | 0.00018  | SLPFKASPLDFGR  | Phospho (ST) | 0.0000001000000.0 | JC_Synth_SCX_6.2810.2810.2.dta |
| SXPFKXSPXLFGR 3 9 2 0 785  | 1 | 827.8848 | 1653.755 | 2 | 26.35 | 0.0038   | SYPPFKVSPLDFGR | Phospho (ST) | 0.0000001000000.0 | JC_Synth_SCX_6.2995.2995.2.dta |
| SXPFKXSPXLFGR 2 6 4 0 529  | 1 | 496.8997 | 1487.677 | 3 | 39    | 0.00047  | SEPFKSPPLDFGR  | Phospho (ST) | 0.0000001000000.0 | JC_Synth_SCX_6.2379.2379.3.dta |
| SXPFKXSPXLFGR 5 3 1 0 1063 | 1 | 530.9275 | 1589.761 | 3 | 36.85 | 0.00084  | SLPFKSPPLDFGR  | Phospho (ST) | 0.0000001000000.0 | JC_Synth_SCX_6.3045.3045.3.dta |
| GPSGXVSAQXLR 6 8 7 0 1375  | 1 | 669.8228 | 1337.631 | 2 | 23.19 | 0.011    | GPSGSVSAQLTR   | Phospho (ST) | 0.0000001000000.0 | JC_Synth_SCX_6.2077.2077.2.dta |
| SXPFKXSPXLFGR 2 2 3 1 448  | 1 | 531.5836 | 1591.729 | 3 | 22.92 | 0.0077   | SEPFKESPLDFGK  | Phospho (ST) | 0.0000001000000.0 | JC_Synth_SCX_6.2726.2726.3.dta |
| SXPFKXSPXLFGR 7 9 5 0 1591 | 1 | 796.8957 | 1591.777 | 2 | 22.71 | 0.011    | STPFKVSPLDFGR  | Phospho (ST) | 0.0000001000000.0 | JC_Synth_SCX_6.2868.2868.2.dta |
| SXPFKXSPXLFGR 9 2 3 0 1847 | 1 | 552.2593 | 1653.756 | 3 | 24.32 | 0.0083   | SYPPFKESPLDFGR | Phospho (ST) | 0.0000001000000.0 | JC_Synth_SCX_6.4524.4524.3.dta |
| GPSGXVSAQXLR 6 0 7 0 1215  | 1 | 655.8074 | 1309.6   | 2 | 32.22 | 0.00     |                |              |                   |                                |

|                            |   |          |          |   |       |          |                |              |                   |                                |
|----------------------------|---|----------|----------|---|-------|----------|----------------|--------------|-------------------|--------------------------------|
| SXPFKXSPLXFGR 0 9 2 0 185  | 1 | 789.8712 | 1577.728 | 2 | 31.26 | 0.0049   | SAPFKYSPLFGR   | Phospho (ST) | 0.0000001000000.0 | JC_Synth_SCX_6.2667.2667.2.dta |
| SXPFKXSPLXFGR 9 1 6 0 1833 | 1 | 790.8609 | 1579.707 | 2 | 27.93 | 0.0089   | SYPFKDSPLFGR   | Phospho (ST) | 0.0000001000000.0 | JC_Synth_SCX_6.2627.2627.2.dta |
| SXPFKXSPLXFGR 0 6 9 0 1339 | 1 | 512.9131 | 1535.717 | 3 | 33.02 | 0.0022   | SAPFKSSPLFGR   | Phospho (ST) | 0.0000001000000.0 | JC_Synth_SCX_6.2475.2475.3.dta |
| SXPFKXSPLXFGR 4 6 6 1 922  | 1 | 468.2305 | 1401.67  | 3 | 37.96 | 0.0013   | SGPFKSSPLAFGK  | Phospho (ST) | 0.0000001000000.0 | JC_Synth_SCX_6.4667.4667.3.dta |
| SXPFKXSPLXFGR 2 2 9 1 460  | 1 | 804.871  | 1607.728 | 2 | 41.57 | 7.00E-05 | SEPFKESPLFVGK  | Phospho (ST) | 0.0000001000000.0 | JC_Synth_SCX_6.2503.2503.2.dta |
| SXPFKXSPLXFGR 7 6 4 1 1530 | 1 | 478.234  | 1431.68  | 3 | 66.94 | 1.30E-06 | STPFKSSPLFGK   | Phospho (ST) | 0.0000001000000.0 | JC_Synth_SCX_6.2325.2325.3.dta |
| SXPFKXSPLXFGR 4 4 4 0 889  | 1 | 462.8905 | 1385.65  | 3 | 39.35 | 0.00071  | SGPFKSSPLGFGGR | Phospho (ST) | 0.0000001000000.0 | JC_Synth_SCX_6.2390.2390.3.dta |
| SXPFKXSPLXFGR 9 6 9 0 1939 | 1 | 543.5886 | 1627.744 | 3 | 57.91 | 4.80E-06 | SYPFKSSPLFGR   | Phospho (ST) | 0.0000001000000.0 | JC_Synth_SCX_6.2638.2638.3.dta |
| SXPFKXSPLXFGR 6 6 9 0 1339 | 1 | 518.2449 | 1551.713 | 3 | 49.56 | 3.70E-05 | SSPFKSSPLFGR   | Phospho (ST) | 0.0000001000000.0 | JC_Synth_SCX_6.2500.2500.3.dta |
| SXPFKXSPLXFGR 8 3 9 0 1679 | 1 | 542.2692 | 1623.786 | 3 | 43.24 | 6.40E-05 | SVPFKSPLFGR    | Phospho (ST) | 0.0000001000000.0 | JC_Synth_SCX_6.3110.3110.3.dta |
| SXPFKXSPLXFGR 2 1 2 0 425  | 1 | 794.8561 | 1587.698 | 2 | 32.94 | 0.002    | SEPFKDSPLFGR   | Phospho (ST) | 0.0000001000000.0 | JC_Synth_SCX_6.2501.2501.2.dta |
| SXPFKXSPLXFGR 6 8 6 1 1374 | 1 | 487.5779 | 1459.712 | 3 | 23.56 | 0.015    | SSPFKSSPLFGR   | Phospho (ST) | 0.0000001000000.0 | JC_Synth_SCX_6.2694.2694.3.dta |
| SXPFKXSPLXFGR 9 7 4 0 1949 | 1 | 768.8663 | 1535.718 | 2 | 28.39 | 0.007    | SYPFKSSPLFGR   | Phospho (ST) | 0.0000001000000.0 | JC_Synth_SCX_6.2611.2611.2.dta |
| SXPFKXSPLXFGR 6 1 1 0 1223 | 1 | 511.5645 | 1531.672 | 3 | 47.41 | 0.0001   | SSPFKSSPLDFGR  | Phospho (ST) | 0.0000001000000.0 | JC_Synth_SCX_6.2565.2565.3.dta |
| SXPFKXSPLXFGR 9 6 1 0 1923 | 1 | 527.5766 | 1579.708 | 3 | 48.57 | 7.70E-05 | SYPFKSSPLDFGR  | Phospho (ST) | 0.0000001000000.0 | JC_Synth_SCX_6.2634.2634.3.dta |
| SXPFKXSPLXFGR 0 4 4 1 90   | 1 | 458.2271 | 1371.66  | 3 | 61.81 | 2.50E-06 | SAPFKSSPLFGK   | Phospho (ST) | 0.0000001000000.0 | JC_Synth_SCX_6.2320.2320.3.dta |
| SXPFKXSPLXFGR 4 6 9 0 939  | 1 | 761.8585 | 1521.703 | 2 | 42.39 | 0.00021  | SGPFKSSPLFGR   | Phospho (ST) | 0.0000001000000.0 | JC_Synth_SCX_6.2493.2493.2.dta |
| SXPFKXSPLXFGR 0 6 0 1 122  | 1 | 472.9026 | 1415.686 | 3 | 62.09 | 5.80E-06 | SAPFKSSPLAFGK  | Phospho (ST) | 0.0000001000000.0 | JC_Synth_SCX_6.2323.2323.3.dta |
| SXPFKXSPLXFGR 2 5 2 0 505  | 1 | 529.5923 | 1585.755 | 3 | 63.2  | 1.50E-06 | SEPFKESPLFVGK  | Phospho (ST) | 0.0000001000000.0 | JC_Synth_SCX_6.2928.2928.3.dta |
| SXPFKXSPLXFGR 0 2 9 1 60   | 1 | 775.8686 | 1549.723 | 2 | 26.62 | 0.014    | SAPFKESPLFVGK  | Phospho (ST) | 0.0000001000000.0 | JC_Synth_SCX_6.2460.2460.2.dta |
| SXPFKXSPLXFGR 1 9 2 0 385  | 1 | 541.5802 | 1621.719 | 3 | 33.53 | 0.0022   | SDPFKYSPLFGR   | Phospho (ST) | 0.0000001000000.0 | JC_Synth_SCX_6.2806.2806.3.dta |
| SXPFKXSPLXFGR 4 9 9 0 999  | 1 | 533.5853 | 1597.734 | 3 | 48.21 | 2.50E-05 | SGPFKYSPLFGR   | Phospho (ST) | 0.0000001000000.0 | JC_Synth_SCX_6.2748.2748.3.dta |
| SXPFKXSPLXFGR 9 3 0 0 1861 | 1 | 798.8846 | 1595.755 | 2 | 21.06 | 0.011    | SYPFKSPLAFGR   | Phospho (ST) | 0.0000001000000.0 | JC_Synth_SCX_6.2659.2659.2.dta |
| SXPFKXSPLXFGR 6 3 5 1 1272 | 1 | 512.262  | 1533.764 | 3 | 54.16 | 1.60E-05 | SSPFKSSPLFGR   | Phospho (ST) | 0.0000001000000.0 | JC_Synth_SCX_6.3149.3149.3.dta |
| SXPFKXSPLXFGR 6 9 4 0 1389 | 1 | 761.8586 | 1521.703 | 2 | 32.78 | 0.0019   | SSPFKYSPLDFGR  | Phospho (ST) | 0.0000001000000.0 | JC_Synth_SCX_6.2666.2666.2.dta |
| SXPFKXSPLXFGR 6 5 6 0 1313 | 1 | 751.8743 | 1501.734 | 2 | 43.51 | 6.70E-05 | SSPFKSSPLFGR   | Phospho (ST) | 0.0000001000000.0 | JC_Synth_SCX_6.2890.2890.2.dta |
| SXPFKXSPLXFGR 5 9 3 0 1187 | 1 | 546.9412 | 1637.802 | 3 | 31.07 | 0.0011   | SLPFKYSPLFGR   | Phospho (ST) | 0.0000001000000.0 | JC_Synth_SCX_6.3171.3171.3.dta |
| SXPFKXSPLXFGR 8 3 8 0 1857 | 1 | 803.8875 | 1605.76  | 2 | 44.54 | 0.00017  | SYPFKESPLFGR   | Phospho (ST) | 0.0000001000000.0 | JC_Synth_SCX_6.2672.2672.2.dta |
| SXPFKXSPLXFGR 2 6 9 0 539  | 1 | 797.8693 | 1593.724 | 2 | 28.13 | 0.0085   | SEPFKSSPLFGR   | Phospho (ST) | 0.0000001000000.0 | JC_Synth_SCX_6.2511.2511.2.dta |
| SXPFKXSPLXFGR 1 5 2 0 305  | 1 | 786.8771 | 1571.74  | 2 | 34.86 | 0.0024   | SDPFKSSPLFGR   | Phospho (ST) | 0.0000001000000.0 | JC_Synth_SCX_6.3018.3018.2.dta |
| SXPFKXSPLXFGR 5 2 4 0 1049 | 1 | 757.8743 | 1513.734 | 2 | 34.63 | 0.0021   | SLPFKSSPLFGR   | Phospho (ST) | 0.0000001000000.0 | JC_Synth_SCX_6.2659.2659.2.dta |
| SXPFKXSPLXFGR 0 5 8 0 117  | 1 | 500.2658 | 1497.776 | 3 | 62.46 | 8.50E-07 | SAPFKSSPLVGR   | Phospho (ST) | 0.0000001000000.0 | JC_Synth_SCX_6.2990.2990.3.dta |
| SXPFKXSPLXFGR 5 2 3 0 1047 | 1 | 535.601  | 1603.781 | 3 | 39.56 | 0.00028  | SLPFKESPLFGR   | Phospho (ST) | 0.0000001000000.0 | JC_Synth_SCX_6.2943.2943.3.dta |
| SXPFKXSPLXFGR 7 3 9 1 1480 | 1 | 533.5938 | 1597.759 | 3 | 56.47 | 5.50E-06 | STPFKFSPLFVGK  | Phospho (ST) | 0.0000001000000.0 | JC_Synth_SCX_6.2988.2988.3.dta |
| GPSGVXSAQXLXR 0 8 7 0 175  | 1 | 661.8273 | 1321.64  | 2 | 57.17 | 5.30E-06 | SGPSGAVSAQLTR  | Phospho (ST) | 0.0000001000000.0 | JC_Synth_SCX_6.2115.2115.2.dta |
| SXPFKXSPLXFGR 8 3 5 0 1671 | 1 | 525.6096 | 1573.807 | 3 | 73.46 | 4.50E-08 | SVPFKSPLFGR    | Phospho (ST) | 0.0000001000000.0 | JC_Synth_SCX_6.3284.3284.3.dta |
| SXPFKXSPLXFGR 9 9 9 1 2000 | 1 | 559.5973 | 1675.77  | 3 | 58.88 | 2.30E-06 | SYPFKYSPLFVGK  | Phospho (ST) | 0.0000001000000.0 | JC_Synth_SCX_6.2807.2807.3.dta |
| SXPFKXSPLXFGR 4 1 3 1 828  | 1 | 502.9062 | 1505.697 | 3 | 51.96 | 2.70E-05 | SGPFKSSPLFGR   | Phospho (ST) | 0.0000001000000.0 | JC_Synth_SCX_6.2743.2743.3.dta |
| SXPFKXSPLXFGR 0 1 0 0 21   | 1 | 491.5697 | 1471.687 | 3 | 59.15 | 6.30E-06 | SAPFKDSPLAFGR  | Phospho (ST) | 0.0000001000000.0 | JC_Synth_SCX_6.2443.2443.3.dta |
| SXPFKXSPLXFGR 3 5 3 0 707  | 1 | 811.9109 | 1621.807 | 2 | 39.53 | 0.00013  | SFPFKLSPLFGR   | Phospho (ST) | 0.0000001000000.0 | JC_Synth_SCX_6.3586.3586.2.dta |
| GPSGVXSAQXLXR 0 9 7 0 195  | 1 | 693.8249 | 1385.635 | 2 | 64.76 | 1.50E-06 | GPSGAVSAQLTR   | Phospho (ST) | 0.0000001000000.0 | JC_Synth_SCX_6.2079.2079.2.dta |
| SXPFKXSPLXFGR 4 2 8 0 857  | 1 | 590.9135 | 1499.719 | 3 | 51.2  | 4.90E-05 | SGPFKSSPLFGR   | Phospho (ST) | 0.0000001000000.0 | JC_Synth_SCX_6.2536.2536.3.dta |
| SXPFKXSPLXFGR 9 0 3 0 1807 | 1 | 532.9257 | 1595.755 | 3 | 46.66 | 2.90E-05 | SYPFKASPLFGR   | Phospho (ST) | 0.0000001000000.0 | JC_Synth_SCX_6.2917.2917.3.dta |
| SXPFKXSPLXFGR 0 2 9 0 59   | 1 | 789.8719 | 1577.729 | 2 | 44.94 | 0.00021  | SAPFKSSPLFGR   | Phospho (ST) | 0.0000001000000.0 | JC_Synth_SCX_6.2509.2509.2.dta |
| SXPFKXSPLXFGR 5 1 6 0 1033 | 1 | 510.9171 | 1529.729 | 3 | 42.88 | 0.00029  | SLPFKSSPLFGR   | Phospho (ST) | 0.0000001000000.0 | JC_Synth_SCX_6.2718.2718.3.dta |
| SXPFKXSPLXFGR 2 9 2 0 585  | 1 | 546.2523 | 1635.735 | 3 | 56.59 | 6.90E-06 | SEPFKYSPLFGR   | Phospho (ST) | 0.0000001000000.0 | JC_Synth_SCX_6.2711.2711.3.dta |
| SXPFKXSPLXFGR 9 9 9 0 1999 | 1 | 852.8955 | 1703.777 | 2 | 44.61 | 3.50E-05 | SYPFKYSPLFGR   | Phospho (ST) | 0.0000001000000.0 | JC_Synth_SCX_6.2844.2844.2.dta |
| SXPFKXSPLXFGR 9 3 0 0 1987 | 1 | 563.6011 | 1687.782 | 3 | 47.45 | 2.70E-05 | SYPFKYSPLFGR   | Phospho (ST) | 0.0000001000000.0 | JC_Synth_SCX_6.3047.3047.3.dta |
| SXPFKXSPLXFGR 8 1 2 0 1625 | 1 | 779.8694 | 1557.724 | 2 | 39.69 | 0.00084  | SVPFKDSPLFGR   | Phospho (ST) | 0.0000001000000.0 | JC_Synth_SCX_6.2556.2556.2.dta |
| SXPFKXSPLXFGR 9 9 3 1 1988 | 1 | 554.2657 | 1659.775 | 3 | 55.87 | 5.80E-06 | SYPFKYSPLFGR   | Phospho (ST) | 0.0000001000000.0 | JC_Synth_SCX_6.3002.3002.3.dta |
| SXPFKXSPLXFGR 0 2 5 0 51   | 1 | 510.2573 | 1527.75  | 3 | 38.83 | 0.00056  | SAPFKESPLFGR   | Phospho (ST) | 0.0000001000000.0 | JC_Synth_SCX_6.2637.2637.3.dta |
| SXPFKXSPLXFGR 9 9 6 0 1993 | 1 | 543.589  | 1627.745 | 3 | 64.02 | 1.20E-06 | SYPFKYSPLFGR   | Phospho (ST) | 0.0000001000000.0 | JC_Synth_SCX_6.2787.2787.3.dta |
| SXPFKXSPLXFGR 2 1 9 0 439  | 1 | 811.8669 | 1621.719 | 2 | 29.63 | 0.0054   | SEPFKSSPLFGR   | Phospho (ST) | 0.0000001000000.0 | JC_Synth_SCX_6.2573.2573.2.dta |
| SXPFKXSPLXFGR 9 7 2 0 1945 | 1 | 804.8773 | 1607.74  | 2 | 41.76 | 0.00029  | SYPFKSSPLFGR   | Phospho (ST) | 0.0000001000000.0 | JC_Synth_SCX_6.2644.2644.2.dta |
| SXPFKXSPLXFGR 4 5 3 1 908  | 1 | 752.8844 | 1503.754 | 2 | 30.03 | 0.0021   | SGPFKSSPLFGR   | Phospho (ST) | 0.0000001000000.0 | JC_Synth_SCX_6.3511.3511.2.dta |
| SXPFKXSPLXFGR 5 9 5 0 1191 | 1 | 802.9163 | 1603.818 | 2 | 19.67 | 0.011    | SLPFKYSPLFGR   | Phospho (ST) | 0.0000001000000.0 | JC_Synth_SCX_6.3386.3386.2.dta |
| SXPFKXSPLXFGR 0 6 4 1 130  | 1 | 468.2309 | 1401.671 | 3 | 52.69 | 5.00E-05 | SAPFKSSPLFGR   | Phospho (ST) | 0.0000001000000.0 | JC_Synth_SCX_6.2315.2315.3.dta |
| SXPFKXSPLXFGR 5 5 6 1 1114 | 1 | 500.9341 | 1499.78  | 3 | 67.55 | 4.70E-07 | SLPFKSSPLFGR   | Phospho (ST) | 0.0000001000000.0 | JC_Synth_SCX_6.3096.3096.3.dta |
| SXPFKXSPLXFGR 3 9 3 0 787  | 1 | 558.2695 | 1671.787 | 3 | 48.65 | 2.00E-05 | SFPFKYSPLFGR   | Phospho (ST) | 0.0000001000000.0 | JC_Synth_SCX_6.3292.3292.3.dta |
| SXPFKXSPLXFGR 9 3 1 0 1863 | 1 | 547.5891 | 1639.745 | 3 | 24.37 | 0.00082  | SYPFKSSPLDFGR  | Phospho (ST) | 0.0000001000000.0 | JC_Synth_SCX_6.3147.3147.3.dta |
| SXPFKXSPLXFGR 0 8 0 1 162  | 1 | 714.8687 | 1427.723 | 2 | 30.66 | 0.0034   | SAPFKVSPLAFGK  | Phospho (ST) | 0.0000001000000.0 | JC_Synth_SCX_6.2826.2826.2.dta |
| SXPFKXSPLXFGR 9 0 9 0 1819 | 1 | 538.2574 | 1611.75  | 3 | 55.1  | 7.40E-06 | SYPFKASPLFGR   | Phospho (ST) | 0.0000001000000.0 | JC_Synth_SCX_6.2717.2717.3.dta |
| SXPFKXSPLXFGR 5 9 3 1 1188 | 1 | 537.606  | 1609.796 | 3 | 20.87 | 0.00098  | SLPFKYSPLFGR   | Phospho (ST) | 0.0000001000000.0 | JC_Synth_SCX_6.3630.3630.3.dta |
| SXPFKXSPLXFGR 6 6 2 1 1326 | 1 | 497.5696 | 1489.687 | 3 | 80.55 | 2.70E-08 | SSPFKSSPLFGR   | Phospho (ST) | 0.0000001000000.0 | JC_Synth_SCX_6.2366.2366.3.dta |
| SXPFKXSPLXFGR 1 5 5 0 311  | 1 | 778.8981 | 1555.782 | 2 | 57.68 | 6.10E-06 | SDPFKSSPLFGR   | Phospho (ST) | 0.0000001000000.0 | JC_Synth_SCX_6.3346.3346.2.dta |
| SXPFKXSPLXFGR 7 5 3 1 1508 | 1 | 774.8976 | 1547.781 | 2 | 30.12 | 0.003    | STPFKLSPLFGR   | Phospho (ST) | 0.0000001000000.0 | JC_Synth_SCX_6.3194.3194.2.dta |
| SXPFKXSPLXFGR 0 2 2 0 45   | 1 | 515.5769 | 1543.709 | 3 | 57.29 | 1.40E-05 | SAPFKESPLFGR   | Phospho (ST) | 0.0000001000000.0 | JC_Synth_SCX_6.2438.2438.3.dta |
| SXPFKXSPLXFGR 3 3 4 1 670  | 1 | 513.5869 | 1537.739 | 3 | 39.55 | 0.00011  | SFPFKSPLFGR    | Phospho (ST) | 0.0000001000000.0 | JC_Synth_SCX_6.3286.3286.3.dta |
| SXPFKXSPLXFGR 3 8 3 0 767  | 1 | 804.9033 | 1607.792 | 2 | 36.16 | 0.00039  | SFPFKSPLFGR    | Phospho (ST) | 0.0000001000000.0 | JC_Synth_SCX_6.3403.3403.3.dta |
| SXPFKXSPLXFGR 0 5 3 1 108  | 1 | 506.9306 | 1517.77  | 3 | 67.77 | 2.80E-07 | SAPFKSSPLFGR   | Phospho (ST) | 0.0000001000000.0 | JC_Synth_SCX_6.3178.3178.3.dta |
| SXPFKXSPLXFGR 3 0 4 0 609  | 1 | 745.8641 | 1489.714 | 2 | 29.91 | 0.0026   | SFPFKASPLFGR   | Phospho (ST) | 0.0000001000000.0 | JC_Synth_SCX_6.2835.2835.2.dta |
| SXPFKXSPLXFGR 5 5 2 0 1105 | 1 | 524.2731 | 1569.797 | 3 | 64.36 | 1.00E-06 | SLPFKSSPLFGR   | Phospho (ST) | 0.0000001000000.0 | JC_Synth_SCX_6.3150.3150.3.dta |
| SXPFKXSPLXFGR 6 5 6 1 1314 | 1 | 492.2501 | 1473.729 | 3 | 59.06 | 4.80E-06 | SSPFKSSPLFGR   | Phospho (ST) | 0.0000001000000.0 | JC_Synth_SCX_6.2859.2859.3.dta |
| SXPFKXSPLXFGR 4 5 4 0 909  | 1 | 481.5785 | 1441.714 | 3 | 71.84 | 4.20E-07 | SGPFKSSPLFGR   | Phospho (ST) | 0.0000001000000.0 | JC_Synth_SCX_6.2635.2635.3.dta |
| SXPFKXSPLXFGR 1 3 1 0 263  | 1 | 531.577  | 1591.709 | 3 | 53.06 | 2.20E-05 | SDPFKSSPLDFGR  | Phospho (ST) | 0.0000001000000.0 | JC_Synth_SCX_6.3155.3155.3.dta |
| SXPFKXSPLXFGR 5 3 5 0 1071 | 1 | 530.2817 | 1587.823 | 3 | 22.7  | 0.0054   | SLPFKSSPLFGR   | Phospho (ST) | 0.0000001000000.0 | JC_Synth_SCX_6.3589.3589.3.dta |
| SXPFKXSPLXFGR 4 5 4 1 910  | 1 | 707.861  | 1413.708 | 2 | 35.8  | 0.00067  | SGPFKSSPLFGR   | Phospho (ST) | 0.0000001000000.0 | JC_Synth_SCX_6.2829.2829.2.dta |
| SXPFKXSPLXFGR 9 3 9 1 1880 | 1 | 830.8952 | 1659.776 | 2 | 25.69 | 0.0061   | SYPFKSPLFGR    | Phospho (ST) | 0.0000001000000.0 | JC_Synth_SCX_6.2996.2996.2.dta |
| SXPFKXSPLXFGR 6 3 0 1 1262 | 1 | 498.24   |          |   |       |          |                |              |                   |                                |



|                             |   |          |          |   |       |          |                |              |                   |                                |
|-----------------------------|---|----------|----------|---|-------|----------|----------------|--------------|-------------------|--------------------------------|
| SXPFKXSPLXFGFR 0 3 5 0 71   | 1 | 516.2661 | 1545.777 | 3 | 48.71 | 1.30E-05 | SAPFKFSPLLFGR  | Phospho (ST) | 0.0000001000000.0 | JC_Synth_SCX_6.3170.3170.3.dta |
| SXPFKXSPLXFGFR 5 9 1 0 1183 | 1 | 536.261  | 1605.761 | 3 | 52.09 | 2.90E-05 | SLPFKXSPDLFGR  | Phospho (ST) | 0.0000001000000.0 | JC_Synth_SCX_6.2957.2957.3.dta |
| SXPFKXSPLXFGFR 1 5 5 1 312  | 1 | 510.2659 | 1527.776 | 3 | 60.47 | 3.90E-06 | SDPFKSPLLFGR   | Phospho (ST) | 0.0000001000000.0 | JC_Synth_SCX_6.3287.3287.3.dta |
| SXPFKXSPLXFGFR 4 3 4 1 870  | 1 | 483.5713 | 1447.692 | 3 | 43.12 | 5.90E-05 | SGPFKSPPLFGFK  | Phospho (ST) | 0.0000001000000.0 | JC_Synth_SCX_6.2909.2909.3.dta |
| SXPFKXSPLXFGFR 6 6 2 0 1325 | 1 | 506.9051 | 1517.694 | 3 | 30.81 | 0.0026   | SSPFKSPLEFGR   | Phospho (ST) | 0.0000001000000.0 | JC_Synth_SCX_6.2403.2403.3.dta |
| SXPFKXSPLXFGFR 4 9 3 0 987  | 1 | 528.254  | 1581.74  | 3 | 50.75 | 8.40E-06 | SGPFKXSPLLFGR  | Phospho (ST) | 0.0000001000000.0 | JC_Synth_SCX_6.2952.2952.3.dta |
| SXPFKXSPLXFGFR 5 0 8 0 1017 | 1 | 500.2661 | 1497.777 | 3 | 55.52 | 4.20E-06 | SLPFKXSPLVFGR  | Phospho (ST) | 0.0000001000000.0 | JC_Synth_SCX_6.2832.2832.3.dta |
| SXPFKXSPLXFGFR 8 2 5 0 1651 | 1 | 778.8983 | 1555.782 | 2 | 32.21 | 0.0022   | SVPFKSPLLFGR   | Phospho (ST) | 0.0000001000000.0 | JC_Synth_SCX_6.2719.2719.2.dta |
| SXPFKXSPLXFGFR 2 2 7 1 456  | 1 | 516.2452 | 1545.714 | 3 | 25.82 | 0.0026   | SEPFKSPLEFGR   | Phospho (ST) | 0.0000001000000.0 | JC_Synth_SCX_6.2339.2339.3.dta |
| SXPFKXSPLXFGFR 4 3 3 1 868  | 1 | 769.8768 | 1537.739 | 2 | 26.38 | 0.0023   | SGPFKSPLEFGR   | Phospho (ST) | 0.0000001000000.0 | JC_Synth_SCX_6.3220.3220.2.dta |
| SXPFKXSPLXFGFR 7 6 6 1 1534 | 1 | 488.2381 | 1461.693 | 3 | 41.22 | 0.00048  | STPFKSPSLFGR   | Phospho (ST) | 0.0000001000000.0 | JC_Synth_SCX_6.2356.2356.3.dta |
| SXPFKXSPLXFGFR 4 0 5 0 811  | 1 | 486.2505 | 1455.73  | 3 | 49.92 | 3.50E-05 | SGPFKASPLFGR   | Phospho (ST) | 0.0000001000000.0 | JC_Synth_SCX_6.2708.2708.3.dta |
| SXPFKXSPLXFGFR 2 9 6 0 593  | 1 | 532.249  | 1593.725 | 3 | 36.94 | 0.0011   | SEPFKXSPSLFGR  | Phospho (ST) | 0.0000001000000.0 | JC_Synth_SCX_6.2700.2700.3.dta |
| SXPFKXSPLXFGFR 3 3 7 1 676  | 1 | 528.2625 | 1581.766 | 3 | 28.36 | 0.0018   | SFPFKSPSLFGR   | Phospho (ST) | 0.0000001000000.0 | JC_Synth_SCX_6.3291.3291.3.dta |
| SXPFKXSPLXFGFR 2 5 3 0 507  | 1 | 535.6014 | 1603.782 | 3 | 52.74 | 1.30E-05 | SEPFKXSPPLFGR  | Phospho (ST) | 0.0000001000000.0 | JC_Synth_SCX_6.3250.3250.3.dta |
| SXPFKXSPLXFGFR 6 6 0 0 1321 | 1 | 487.57   | 1459.688 | 3 | 32.21 | 0.0024   | SSPFKSPPLAFGR  | Phospho (ST) | 0.0000001000000.0 | JC_Synth_SCX_6.2210.2210.3.dta |
| SXPFKXSPLXFGFR 5 5 5 1 1112 | 1 | 763.9238 | 1525.833 | 2 | 26.31 | 0.0023   | SLPFKXSPLLFGR  | Phospho (ST) | 0.0000001000000.0 | JC_Synth_SCX_6.3418.3418.2.dta |
| SXPFKXSPLXFGFR 7 3 3 1 1468 | 1 | 791.8901 | 1581.766 | 2 | 21.16 | 0.0092   | STPFKXSPLEFGR  | Phospho (ST) | 0.0000001000000.0 | JC_Synth_SCX_6.3223.3223.2.dta |
| SXPFKXSPLXFGFR 0 6 0 0 121  | 1 | 482.2384 | 1443.693 | 3 | 32.79 | 0.0022   | SAPFKXSPPLAFGR | Phospho (ST) | 0.0000001000000.0 | JC_Synth_SCX_6.2188.2188.3.dta |
| SXPFKXSPLXFGFR 3 3 8 1 678  | 1 | 790.9005 | 1579.786 | 2 | 22.37 | 0.0064   | SFPFKXSPLVFGR  | Phospho (ST) | 0.0000001000000.0 | JC_Synth_SCX_6.3404.3404.2.dta |
| SXPFKXSPLXFGFR 3 3 9 1 680  | 1 | 822.8979 | 1643.781 | 2 | 24.95 | 0.0077   | SFPFKXSPLYFGR  | Phospho (ST) | 0.0000001000000.0 | JC_Synth_SCX_6.3370.3370.2.dta |
| SXPFKXSPLXFGFR 9 2 9 1 1860 | 1 | 821.8824 | 1641.75  | 2 | 22.05 | 0.0062   | SYPFKXSPLYFGR  | Phospho (ST) | 0.0000001000000.0 | JC_Synth_SCX_6.2618.2618.2.dta |
| SXPFKXSPLXFGFR 6 5 1 1 1304 | 1 | 501.5819 | 1501.724 | 3 | 43.8  | 0.00016  | SSPFKXSPPLFGR  | Phospho (ST) | 0.0000001000000.0 | JC_Synth_SCX_6.2932.2932.3.dta |
| SXPFKXSPLXFGFR 5 2 5 0 1051 | 1 | 524.2733 | 1569.798 | 3 | 74.75 | 9.40E-08 | SLPFKXSPLLFGR  | Phospho (ST) | 0.0000001000000.0 | JC_Synth_SCX_6.2862.2862.3.dta |
| SXPFKXSPLXFGFR 4 9 3 1 988  | 1 | 518.9187 | 1553.734 | 3 | 63.13 | 1.80E-06 | SGPFKXSPPLFGR  | Phospho (ST) | 0.0000001000000.0 | JC_Synth_SCX_6.2910.2910.3.dta |
| SXPFKXSPLXFGFR 2 0 0 0 401  | 1 | 743.8593 | 1485.704 | 2 | 35.71 | 0.0014   | SEPFKASPLAFGR  | Phospho (ST) | 0.0000001000000.0 | JC_Synth_SCX_6.2506.2506.2.dta |
| SXPFKXSPLXFGFR 2 9 5 0 591  | 1 | 540.933  | 1619.777 | 3 | 30.39 | 0.0027   | SEPFKXSPPLFGR  | Phospho (ST) | 0.0000001000000.0 | JC_Synth_SCX_6.2900.2900.3.dta |
| SXPFKXSPLXFGFR 2 9 2 1 586  | 1 | 536.9172 | 1607.73  | 3 | 40.01 | 0.00012  | SEPFKXSPLEFGR  | Phospho (ST) | 0.0000001000000.0 | JC_Synth_SCX_6.2677.2677.3.dta |
| SXPFKXSPLXFGFR 5 9 9 0 1199 | 1 | 552.2733 | 1653.798 | 3 | 70.61 | 8.70E-08 | SLPFKXSPLYFGR  | Phospho (ST) | 0.0000001000000.0 | JC_Synth_SCX_6.2950.2950.3.dta |
| SXPFKXSPLXFGFR 3 5 0 1 702  | 1 | 759.8926 | 1517.771 | 2 | 33.41 | 0.00062  | SFPFKXSPPLAFGR | Phospho (ST) | 0.0000001000000.0 | JC_Synth_SCX_6.3195.3195.2.dta |
| SXPFKXSPLXFGFR 2 2 8 0 457  | 1 | 786.8777 | 1571.741 | 2 | 35.72 | 0.002    | SEPFKXSPLVFGR  | Phospho (ST) | 0.0000001000000.0 | JC_Synth_SCX_6.2544.2544.2.dta |
| SXPFKXSPLXFGFR 6 1 1 1 1224 | 1 | 502.2296 | 1503.667 | 3 | 55.12 | 8.20E-06 | SSPFKXSPDLFGR  | Phospho (ST) | 0.0000001000000.0 | JC_Synth_SCX_6.2525.2525.3.dta |
| SXPFKXSPLXFGFR 6 3 3 1 1268 | 1 | 784.8823 | 1567.75  | 2 | 25.76 | 0.007    | SFPFKXSPLEFGR  | Phospho (ST) | 0.0000001000000.0 | JC_Synth_SCX_6.3228.3228.2.dta |
| SXPFKXSPLXFGFR 7 5 0 0 1501 | 1 | 750.8853 | 1499.756 | 2 | 31.38 | 0.0013   | STPFKXSPPLAFGR | Phospho (ST) | 0.0000001000000.0 | JC_Synth_SCX_6.2882.2882.2.dta |
| SXPFKXSPLXFGFR 9 2 3 1 1848 | 1 | 813.8851 | 1625.756 | 2 | 27.02 | 0.003    | SYPFKXSPPLFGR  | Phospho (ST) | 0.0000001000000.0 | JC_Synth_SCX_6.2814.2814.2.dta |
| GPSGXVSAQXLR 9 2 6 0 1853   | 1 | 715.8203 | 1429.626 | 2 | 43.22 | 0.00029  | GPSGVVSAQXLR   | Phospho (ST) | 0.0000001000000.0 | JC_Synth_SCX_6.2023.2023.2.dta |
| SXPFKXSPLXFGFR 1 1 5 0 231  | 1 | 520.249  | 1557.725 | 3 | 40.59 | 0.00068  | SDPFKXSPPLFGR  | Phospho (ST) | 0.0000001000000.0 | JC_Synth_SCX_6.2815.2815.3.dta |
| SXPFKXSPLXFGFR 5 6 0 1 1122 | 1 | 486.9187 | 1457.734 | 3 | 44.94 | 0.00014  | SLPFKXSPPLAFGR | Phospho (ST) | 0.0000001000000.0 | JC_Synth_SCX_6.2603.2603.3.dta |
| SXPFKXSPLXFGFR 4 2 3 0 459  | 1 | 546.2526 | 1635.736 | 3 | 27.23 | 6.00E-05 | SEPFKXSPLVFGR  | Phospho (ST) | 0.0000001000000.0 | JC_Synth_SCX_6.2551.2551.3.dta |
| SXPFKXSPLXFGFR 4 3 5 1 872  | 1 | 752.8848 | 1503.755 | 2 | 34.42 | 0.00065  | SGPFKXSPPLFGR  | Phospho (ST) | 0.0000001000000.0 | JC_Synth_SCX_6.3131.3131.2.dta |
| SXPFKXSPLXFGFR 4 2 9 0 859  | 1 | 522.2455 | 1563.715 | 3 | 48.23 | 8.70E-05 | SGPFKXSPLYFGR  | Phospho (ST) | 0.0000001000000.0 | JC_Synth_SCX_6.2548.2548.3.dta |
| SXPFKXSPLXFGFR 0 1 8 0 37   | 1 | 750.8672 | 1499.72  | 2 | 46.34 | 0.00015  | SAPFKXSPLVFGR  | Phospho (ST) | 0.0000001000000.0 | JC_Synth_SCX_6.2532.2532.2.dta |
| SXPFKXSPLXFGFR 4 4 0 1 882  | 1 | 458.2276 | 1371.661 | 3 | 23.9  | 0.012    | SGPFKXSPPLAFGR | Phospho (ST) | 0.0000001000000.0 | JC_Synth_SCX_6.4746.4746.3.dta |
| SXPFKXSPLXFGFR 6 6 4 1 1330 | 1 | 473.5628 | 1417.667 | 3 | 42.8  | 0.00028  | SSPFKXSPPLFGR  | Phospho (ST) | 0.0000001000000.0 | JC_Synth_SCX_6.2170.2170.3.dta |
| SXPFKXSPLXFGFR 2 2 2 0 445  | 1 | 801.8649 | 1601.715 | 2 | 39.21 | 0.00032  | SEPFKXSPLEFGR  | Phospho (ST) | 0.0000001000000.0 | JC_Synth_SCX_6.2484.2484.2.dta |
| SXPFKXSPLXFGFR 4 5 9 1 920  | 1 | 507.5906 | 1519.75  | 3 | 54.96 | 1.40E-05 | SGPFKXSPLYFGR  | Phospho (ST) | 0.0000001000000.0 | JC_Synth_SCX_6.2925.2925.3.dta |
| SXPFKXSPLXFGFR 7 2 9 1 1460 | 1 | 790.8748 | 1579.735 | 2 | 23.37 | 0.0062   | STPFKXSPLYFGR  | Phospho (ST) | 0.0000001000000.0 | JC_Synth_SCX_6.2483.2483.2.dta |
| SXPFKXSPLXFGFR 0 6 9 1 140  | 1 | 754.8641 | 1507.714 | 2 | 27.75 | 0.014    | SAPFKXSPLYFGR  | Phospho (ST) | 0.0000001000000.0 | JC_Synth_SCX_6.2418.2418.2.dta |
| SXPFKXSPLXFGFR 3 3 4 0 669  | 1 | 522.9225 | 1565.746 | 3 | 66.31 | 2.30E-05 | SFPFKXSPPLFGR  | Phospho (ST) | 0.0000001000000.0 | JC_Synth_SCX_6.3316.3316.3.dta |
| SXPFKXSPLXFGFR 7 6 2 1 1526 | 1 | 502.2418 | 1503.704 | 3 | 42.11 | 1.20E-06 | STPFKXSPLEFGR  | Phospho (ST) | 0.0000001000000.0 | JC_Synth_SCX_6.2359.2359.3.dta |
| SXPFKXSPLXFGFR 1 5 1 0 303  | 1 | 779.87   | 1557.725 | 2 | 45.71 | 0.00021  | SDPFKXSPDLFGR  | Phospho (ST) | 0.0000001000000.0 | JC_Synth_SCX_6.3068.3068.2.dta |
| SXPFKXSPLXFGFR 6 9 4 1 1390 | 1 | 747.8563 | 1493.698 | 2 | 29.94 | 0.0086   | SSPFKXSPPLFGR  | Phospho (ST) | 0.0000001000000.0 | JC_Synth_SCX_6.2626.2626.2.dta |
| SXPFKXSPLXFGFR 4 0 4 1 810  | 1 | 458.2276 | 1371.661 | 3 | 28.39 | 0.0041   | SGPFKXSPPLFGR  | Phospho (ST) | 0.0000001000000.0 | JC_Synth_SCX_6.4879.4879.3.dta |
| SXPFKXSPLXFGFR 9 1 5 0 1831 | 1 | 803.8882 | 1605.762 | 2 | 35.82 | 0.0012   | SYPFKXSPPLFGR  | Phospho (ST) | 0.0000001000000.0 | JC_Synth_SCX_6.2812.2812.2.dta |
| SXPFKXSPLXFGFR 8 8 0 0 1761 | 1 | 742.8879 | 1483.761 | 2 | 24.6  | 0.0052   | SVPFKXSPPLAFGR | Phospho (ST) | 0.0000001000000.0 | JC_Synth_SCX_6.2802.2802.2.dta |
| SXPFKXSPLXFGFR 4 0 9 1 820  | 1 | 493.575  | 1477.703 | 3 | 57.27 | 1.20E-05 | SGPFKXSPLYFGR  | Phospho (ST) | 0.0000001000000.0 | JC_Synth_SCX_6.2533.2533.3.dta |
| SXPFKXSPLXFGFR 6 0 8 0 1217 | 1 | 491.5823 | 1471.725 | 3 | 32.86 | 0.0018   | SSPFKXSPPLFGR  | Phospho (ST) | 0.0000001000000.0 | JC_Synth_SCX_6.2587.2587.3.dta |
| SXPFKXSPLXFGFR 5 7 8 0 1157 | 1 | 764.9011 | 1527.788 | 2 | 35.98 | 0.00039  | SLPFKXSPLVFGR  | Phospho (ST) | 0.0000001000000.0 | JC_Synth_SCX_6.2831.2831.2.dta |
| SXPFKXSPLXFGFR 5 0 4 0 1009 | 1 | 728.8723 | 1455.73  | 2 | 37.21 | 0.00066  | SLPFKXSPPLFGR  | Phospho (ST) | 0.0000001000000.0 | JC_Synth_SCX_6.2722.2722.2.dta |
| SXPFKXSPLXFGFR 2 5 1 0 503  | 1 | 524.921  | 1571.741 | 3 | 27.56 | 0.013    | SEPFKXSPDLFGR  | Phospho (ST) | 0.0000001000000.0 | JC_Synth_SCX_6.2980.2980.3.dta |
| SXPFKXSPLXFGFR 0 1 9 0 39   | 1 | 782.8647 | 1563.715 | 2 | 35.17 | 0.0018   | SAPFKXSPLYFGR  | Phospho (ST) | 0.0000001000000.0 | JC_Synth_SCX_6.2547.2547.2.dta |
| SXPFKXSPLXFGFR 4 0 9 0 819  | 1 | 502.9104 | 1505.709 | 3 | 49.48 | 3.40E-05 | SGPFKXSPLYFGR  | Phospho (ST) | 0.0000001000000.0 | JC_Synth_SCX_6.2572.2572.3.dta |
| SXPFKXSPLXFGFR 5 2 9 0 1059 | 1 | 540.9332 | 1619.778 | 3 | 50.59 | 2.60E-05 | SLPFKXSPLVFGR  | Phospho (ST) | 0.0000001000000.0 | JC_Synth_SCX_6.2750.2750.3.dta |
| SXPFKXSPLXFGFR 8 8 3 0 1767 | 1 | 520.9382 | 1559.793 | 3 | 42.51 | 5.60E-05 | SVPFKXSPPLFGR  | Phospho (ST) | 0.0000001000000.0 | JC_Synth_SCX_6.3111.3111.3.dta |
| GPSGXVSAQXLR 1 1 7 0 235    | 1 | 691.8022 | 1381.59  | 2 | 25.04 | 0.014    | GPSGDVSAQXLR   | Phospho (ST) | 0.0000001000000.0 | JC_Synth_SCX_6.1896.1896.2.dta |
| SXPFKXSPLXFGFR 0 8 8 0 177  | 1 | 495.5944 | 1483.761 | 3 | 64.89 | 4.90E-07 | SAPFKXSPLVFGR  | Phospho (ST) | 0.0000001000000.0 | JC_Synth_SCX_6.2803.2803.3.dta |
| SXPFKXSPLXFGFR 9 8 3 1 1968 | 1 | 532.9345 | 1595.782 | 3 | 61.81 | 9.90E-07 | SYPFKXSPPLFGR  | Phospho (ST) | 0.0000001000000.0 | JC_Synth_SCX_6.3090.3090.3.dta |
| SXPFKXSPLXFGFR 3 0 4 1 610  | 1 | 488.2434 | 1461.708 | 3 | 72.91 | 6.90E-08 | SFPFKXSPPLFGR  | Phospho (ST) | 0.0000001000000.0 | JC_Synth_SCX_6.2798.2798.3.dta |
| SXPFKXSPLXFGFR 3 3 3 1 668  | 1 | 543.6029 | 1627.787 | 3 | 48.81 | 2.00E-05 | SFPFKXSPLEFGR  | Phospho (ST) | 0.0000001000000.0 | JC_Synth_SCX_6.3571.3571.3.dta |
| SXPFKXSPLXFGFR 6 5 2 0 1305 | 1 | 515.5894 | 1543.746 | 3 | 67.91 | 9.20E-07 | SSPFKXSPLEFGR  | Phospho (ST) | 0.0000001000000.0 | JC_Synth_SCX_6.2901.2901.3.dta |
| SXPFKXSPLXFGFR 9 0 9 1 1820 | 1 | 528.9224 | 1583.745 | 3 | 59.56 | 4.80E-06 | SVPFKXSPLYFGR  | Phospho (ST) | 0.0000001000000.0 | JC_Synth_SCX_6.2676.2676.3.dta |
| SXPFKXSPLXFGFR 6 0 1 1 1204 | 1 | 487.5665 | 1459.678 | 3 | 71.78 | 4.00E-07 | SSPFKXSPDLFGR  | Phospho (ST) | 0.0000001000000.0 | JC_Synth_SCX_6.2541.2541.3.dta |
| SXPFKXSPLXFGFR 6 3 1 0 1263 | 1 | 522.2457 | 1563.715 | 3 | 37.04 | 0.0011   | SSPFKXSPDLFGR  | Phospho (ST) | 0.0000001000000.0 | JC_Synth_SCX_6.3053.3053.3.dta |
| SXPFKXSPLXFGFR 4 5 5 0 911  | 1 | 500.2664 | 1497.777 | 3 | 58.92 | 1.90E-06 | SGPFKXSPPLFGR  | Phospho (ST) | 0.0000001000000.0 | JC_Synth_SCX_6.3142.3142.3.dta |
| SXPFKXSPLXFGFR 4 3 0 0 861  | 1 | 497.5788 | 1489.715 | 3 | 59.26 | 3.20E-06 | SGPFKXSPPLAFGR | Phospho (ST) | 0.0000001000000.0 | JC_Synth_SCX_6.2956.2956.3.dta |
| SXPFKXSPLXFGFR 5 8 1 0 1163 | 1 | 771.8909 | 1541.767 | 2 | 55.42 | 1.50E-05 | SLPFKXSPDLFGR  | Phospho (ST) | 0.0000001000000.0 | JC_Synth_SCX_6.3034.3034.2.dta |
| SXPFKXSPLXFGFR 0 0 0 0 11   | 1 | 476.9069 | 1427.699 | 3 | 82.41 | 3.70E-08 | SAPFKASPLAFGR  | Phospho (ST) | 0.0000001000000.0 | JC_Synth_SCX_                  |

|                             |   |          |          |   |       |          |                |              |                   |                                |
|-----------------------------|---|----------|----------|---|-------|----------|----------------|--------------|-------------------|--------------------------------|
| SXPFKXSPLXFGFR[9 2 1 1986   | 1 | 821.883  | 1641.751 | 2 | 19.13 | 0.015    | SYPFKYSPLFEGK  | Phospho (ST) | 0.0000001000000.0 | JC_Synth_SCX_6.2763.2763.2.dta |
| SXPFKXSPLXFGFR[2 7 8 0 557  | 1 | 772.8807 | 1543.747 | 2 | 25.69 | 0.015    | SEPFKTSPLVFGFR | Phospho (ST) | 0.0000001000000.0 | JC_Synth_SCX_6.2589.2589.2.dta |
| SXPFKXSPLXFGFR[4 6 9 1 940  | 1 | 747.8566 | 1493.699 | 2 | 28.92 | 0.011    | SGPFKSSPLVFGK  | Phospho (ST) | 0.0000001000000.0 | JC_Synth_SCX_6.2450.2450.2.dta |
| SXPFKXSPLXFGFR[1 3 3 0 267  | 1 | 812.8833 | 1623.752 | 2 | 33.37 | 0.00048  | SDPFKSPFLFGR   | Phospho (ST) | 0.0000001000000.0 | JC_Synth_SCX_6.3402.3402.2.dta |
| SXPFKXSPLXFGFR[2 8 5 0 571  | 1 | 519.6017 | 1555.783 | 3 | 35.13 | 0.0011   | SEPFKYSPLLFGR  | Phospho (ST) | 0.0000001000000.0 | JC_Synth_SCX_6.2979.2979.3.dta |
| GPSGXVSAQLXR[1 0 0 7 16     | 1 | 633.8094 | 1265.604 | 2 | 36.77 | 0.00028  | GPSGAVSAAQLTK  | Phospho (ST) | 0.0000001000000.0 | JC_Synth_SCX_6.1931.1931.2.dta |
| SXPFKXSPLXFGFR[5 0 3 0 1007 | 1 | 773.8962 | 1545.778 | 2 | 31.16 | 0.00077  | SLPFKASPLFGR   | Phospho (ST) | 0.0000001000000.0 | JC_Synth_SCX_6.3028.3028.2.dta |
| SXPFKXSPLXFGFR[0 6 7 1 136  | 1 | 482.9068 | 1445.699 | 3 | 44.98 | 0.00016  | SAPFKSSPLTFGK  | Phospho (ST) | 0.0000001000000.0 | JC_Synth_SCX_6.2163.2163.3.dta |
| SXPFKXSPLXFGFR[5 9 2 0 1185 | 1 | 810.8965 | 1619.778 | 2 | 34.26 | 0.0013   | SLPFKYSPLFGR   | Phospho (ST) | 0.0000001000000.0 | JC_Synth_SCX_6.2899.2899.2.dta |
| SXPFKXSPLXFGFR[4 1 0 1 822  | 1 | 477.5631 | 1429.667 | 3 | 34.92 | 0.0018   | SGPFKDSPLAFGK  | Phospho (ST) | 0.0000001000000.0 | JC_Synth_SCX_6.4546.4546.3.dta |
| SXPFKXSPLXFGFR[1 4 4 1 290  | 1 | 472.8912 | 1415.652 | 3 | 41.58 | 0.00041  | SDPFKSGPLGFGK  | Phospho (ST) | 0.0000001000000.0 | JC_Synth_SCX_6.2517.2517.3.dta |
| SXPFKXSPLXFGFR[6 1 0 1 1222 | 1 | 487.5666 | 1459.678 | 3 | 28.12 | 0.0093   | SSPFKDSPLAFGK  | Phospho (ST) | 0.0000001000000.0 | JC_Synth_SCX_6.4910.4910.3.dta |
| GPSGXVSAQLXR[6 8 7 1 1376   | 1 | 655.8227 | 1309.631 | 2 | 54.48 | 2.30E-05 | GPSGSVSAQLTK   | Phospho (ST) | 0.0000001000000.0 | JC_Synth_SCX_6.2060.2060.2.dta |
| SXPFKXSPLXFGFR[4 8 5 0 971  | 1 | 495.5947 | 1483.762 | 3 | 63.08 | 7.40E-07 | SGPFKYSPLLFGR  | Phospho (ST) | 0.0000001000000.0 | JC_Synth_SCX_6.2949.2949.3.dta |
| SXPFKXSPLXFGFR[8 8 5 0 1771 | 1 | 763.9119 | 1525.809 | 2 | 37.25 | 0.00019  | SVPFKYSPLFGR   | Phospho (ST) | 0.0000001000000.0 | JC_Synth_SCX_6.3043.3043.2.dta |
| SXPFKXSPLXFGFR[3 0 9 1 620  | 1 | 784.8828 | 1567.751 | 2 | 25    | 0.0084   | SFPFKASPLVFGK  | Phospho (ST) | 0.0000001000000.0 | JC_Synth_SCX_6.2883.2883.2.dta |
| SXPFKXSPLXFGFR[0 0 9 0 19   | 1 | 507.5826 | 1519.726 | 3 | 30.21 | 0.0026   | SAPFKASPLVFGR  | Phospho (ST) | 0.0000001000000.0 | JC_Synth_SCX_6.2564.2564.3.dta |
| SXPFKXSPLXFGFR[0 4 3 1 88   | 1 | 488.2436 | 1461.709 | 3 | 56.22 | 3.20E-06 | SAPFKGSLPFGK   | Phospho (ST) | 0.0000001000000.0 | JC_Synth_SCX_6.2647.2647.3.dta |
| SXPFKXSPLXFGFR[6 5 9 1 1320 | 1 | 517.5945 | 1549.762 | 3 | 66.73 | 7.30E-07 | SSPFKLSPLVFGK  | Phospho (ST) | 0.0000001000000.0 | JC_Synth_SCX_6.2931.2931.3.dta |
| SXPFKXSPLXFGFR[5 3 3 1 1068 | 1 | 532.275  | 1593.803 | 3 | 38.88 | 0.00013  | SLPFKFSPLFGR   | Phospho (ST) | 0.0000001000000.0 | JC_Synth_SCX_6.3475.3475.3.dta |
| SXPFKXSPLXFGFR[3 5 3 1 708  | 1 | 532.275  | 1593.803 | 3 | 21.35 | 0.0073   | SFPFKLSPLFGR   | Phospho (ST) | 0.0000001000000.0 | JC_Synth_SCX_6.3622.3622.3.dta |
| SXPFKXSPLXFGFR[4 1 7 1 836  | 1 | 487.5667 | 1459.678 | 3 | 32.1  | 0.0037   | SGPFKDSPLTFGK  | Phospho (ST) | 0.0000001000000.0 | JC_Synth_SCX_6.5059.5059.3.dta |
| SXPFKXSPLXFGFR[6 0 4 1 1210 | 1 | 468.2315 | 1401.673 | 3 | 29.36 | 0.0074   | SSPFKASPLGFGK  | Phospho (ST) | 0.0000001000000.0 | JC_Synth_SCX_6.2147.2147.3.dta |
| SXPFKXSPLXFGFR[5 0 9 0 1019 | 1 | 521.5983 | 1561.773 | 3 | 46.12 | 6.60E-05 | SLPFKASPLVFGR  | Phospho (ST) | 0.0000001000000.0 | JC_Synth_SCX_6.2819.2819.3.dta |
| SXPFKXSPLXFGFR[1 5 0 1 302  | 1 | 496.2507 | 1485.73  | 3 | 34.89 | 0.002    | SDPFKLSPLAFGK  | Phospho (ST) | 0.0000001000000.0 | JC_Synth_SCX_6.2981.2981.3.dta |
| SXPFKXSPLXFGFR[3 5 8 1 718  | 1 | 773.9089 | 1545.803 | 2 | 23.28 | 0.0085   | SFPFKLSPLVFGK  | Phospho (ST) | 0.0000001000000.0 | JC_Synth_SCX_6.3354.3354.2.dta |
| SXPFKXSPLXFGFR[7 2 0 1 1442 | 1 | 744.8621 | 1487.71  | 2 | 26.29 | 0.0092   | STPFKESPLAFGK  | Phospho (ST) | 0.0000001000000.0 | JC_Synth_SCX_6.2388.2388.2.dta |
| SXPFKXSPLXFGFR[6 3 6 1 1274 | 1 | 754.8647 | 1507.715 | 2 | 29.02 | 0.0093   | SSPFKFSPLFGR   | Phospho (ST) | 0.0000001000000.0 | JC_Synth_SCX_6.2938.2938.2.dta |
| SXPFKXSPLXFGFR[4 5 0 0 901  | 1 | 486.251  | 1455.731 | 3 | 64.82 | 1.10E-06 | SGPFKLSPLAFGR  | Phospho (ST) | 0.0000001000000.0 | JC_Synth_SCX_6.2872.2872.3.dta |
| SXPFKXSPLXFGFR[0 5 9 1 120  | 1 | 767.8908 | 1533.767 | 2 | 30.85 | 0.003    | SAPFKLSPLVFGK  | Phospho (ST) | 0.0000001000000.0 | JC_Synth_SCX_6.2922.2922.2.dta |
| SXPFKXSPLXFGFR[0 0 9 1 20   | 1 | 498.2473 | 1491.72  | 3 | 55.54 | 1.60E-05 | SAPFKASPLVFGK  | Phospho (ST) | 0.0000001000000.0 | JC_Synth_SCX_6.2524.2524.3.dta |
| SXPFKXSPLXFGFR[3 3 5 1 672  | 1 | 532.2751 | 1593.804 | 3 | 37.23 | 0.00019  | SFPFKFSPLFGR   | Phospho (ST) | 0.0000001000000.0 | JC_Synth_SCX_6.3765.3765.3.dta |
| SXPFKXSPLXFGFR[5 5 5 0 1111 | 1 | 518.9543 | 1553.841 | 3 | 56.43 | 3.10E-06 | SLPFKLSPLLFGR  | Phospho (ST) | 0.0000001000000.0 | JC_Synth_SCX_6.3458.3458.3.dta |
| SXPFKXSPLXFGFR[3 5 5 0 711  | 1 | 794.92   | 1587.825 | 2 | 39.47 | 0.00011  | SFPFKLSPLFGR   | Phospho (ST) | 0.0000001000000.0 | JC_Synth_SCX_6.3522.3522.2.dta |
| SXPFKXSPLXFGFR[6 8 1 1 1364 | 1 | 744.8622 | 1487.71  | 2 | 26.61 | 0.01     | SSPFKYSPLDFGK  | Phospho (ST) | 0.0000001000000.0 | JC_Synth_SCX_6.2762.2762.2.dta |
| SXPFKXSPLXFGFR[1 5 3 1 308  | 1 | 521.5947 | 1561.762 | 3 | 73.53 | 2.80E-07 | SDPFKLSPLFGR   | Phospho (ST) | 0.0000001000000.0 | JC_Synth_SCX_6.3355.3355.3.dta |
| SXPFKXSPLXFGFR[8 3 5 1 1672 | 1 | 516.2752 | 1545.804 | 3 | 46.02 | 4.50E-05 | SVPFKFSPLLFGR  | Phospho (ST) | 0.0000001000000.0 | JC_Synth_SCX_6.3322.3322.3.dta |
| SXPFKXSPLXFGFR[9 6 9 1 1940 | 1 | 534.2545 | 1599.742 | 3 | 73.83 | 1.40E-07 | SYPFKSSPLVFGK  | Phospho (ST) | 0.0000001000000.0 | JC_Synth_SCX_6.2592.2592.3.dta |
| SXPFKXSPLXFGFR[5 0 0 0 1001 | 1 | 735.8809 | 1469.747 | 2 | 40.48 | 9.40E-05 | SLPFKASPLAFGR  | Phospho (ST) | 0.0000001000000.0 | JC_Synth_SCX_6.2732.2732.2.dta |
| SXPFKXSPLXFGFR[6 2 5 1 1252 | 1 | 506.2545 | 1515.742 | 3 | 32.52 | 0.0031   | SSPFKESPLFGR   | Phospho (ST) | 0.0000001000000.0 | JC_Synth_SCX_6.2788.2788.3.dta |
| SXPFKXSPLXFGFR[4 9 0 1 982  | 1 | 493.5756 | 1477.705 | 3 | 29.05 | 0.008    | SGPFKYSPLAFGK  | Phospho (ST) | 0.0000001000000.0 | JC_Synth_SCX_6.4498.4498.3.dta |
| SXPFKXSPLXFGFR[7 8 9 1 1580 | 1 | 517.5948 | 1549.763 | 3 | 33.94 | 0.0012   | STPFKYSPLVFGK  | Phospho (ST) | 0.0000001000000.0 | JC_Synth_SCX_6.2766.2766.3.dta |
| SXPFKXSPLXFGFR[0 1 4 1 30   | 1 | 715.8416 | 1429.669 | 2 | 31.2  | 0.0053   | SAPFKDSPLGFGK  | Phospho (ST) | 0.0000001000000.0 | JC_Synth_SCX_6.2370.2370.2.dta |
| GPSGXVSAQLXR[1 6 9 1 340    | 1 | 694.8105 | 1387.606 | 2 | 33.21 | 0.0031   | GPSGDVSSAQLYK  | Phospho (ST) | 0.0000001000000.0 | JC_Synth_SCX_6.1911.1911.2.dta |
| SXPFKXSPLXFGFR[8 3 8 1 1678 | 1 | 766.9017 | 1531.789 | 2 | 27.97 | 0.0029   | SVPFKFSPLVFGK  | Phospho (ST) | 0.0000001000000.0 | JC_Synth_SCX_6.3067.3067.2.dta |
| SXPFKXSPLXFGFR[0 9 8 0 197  | 1 | 516.927  | 1547.759 | 3 | 40.33 | 0.00029  | SAPFKYSPLVFGR  | Phospho (ST) | 0.0000001000000.0 | JC_Synth_SCX_6.2742.2742.3.dta |
| SXPFKXSPLXFGFR[5 3 9 0 1079 | 1 | 819.9105 | 1637.807 | 2 | 51.66 | 9.20E-06 | SLPFKFSPLVFGR  | Phospho (ST) | 0.0000001000000.0 | JC_Synth_SCX_6.3282.3282.2.dta |
| SXPFKXSPLXFGFR[1 9 5 1 392  | 1 | 526.9269 | 1577.759 | 3 | 41.55 | 0.00035  | SDPFKYSPLFGR   | Phospho (ST) | 0.0000001000000.0 | JC_Synth_SCX_6.2965.2965.3.dta |
| SXPFKXSPLXFGFR[9 8 1 1 1964 | 1 | 782.8788 | 1563.743 | 2 | 27.91 | 0.0085   | SYPFKYSPLDFGK  | Phospho (ST) | 0.0000001000000.0 | JC_Synth_SCX_6.2871.2871.2.dta |
| SXPFKXSPLXFGFR[5 0 0 1 1002 | 1 | 721.8784 | 1441.742 | 2 | 32.39 | 0.0011   | SLPFKASPLAFGK  | Phospho (ST) | 0.0000001000000.0 | JC_Synth_SCX_6.2698.2698.2.dta |
| SXPFKXSPLXFGFR[5 7 9 0 1159 | 1 | 398.9538 | 1591.786 | 4 | 28.21 | 0.0023   | SLPFKTSPLVFGR  | Phospho (ST) | 0.0000001000000.0 | JC_Synth_SCX_6.3464.3464.4.dta |
| SXPFKXSPLXFGFR[5 8 1 1 1164 | 1 | 505.5953 | 1513.764 | 3 | 59.3  | 6.00E-06 | SLPFKYSPLDFGK  | Phospho (ST) | 0.0000001000000.0 | JC_Synth_SCX_6.2994.2994.3.dta |
| SXPFKXSPLXFGFR[3 9 8 0 797  | 1 | 812.903  | 1623.792 | 2 | 32.67 | 0.00073  | SFPFKYSPLVFGR  | Phospho (ST) | 0.0000001000000.0 | JC_Synth_SCX_6.3095.3095.2.dta |
| SXPFKXSPLXFGFR[6 6 1 0 1323 | 1 | 502.2318 | 1503.674 | 3 | 51.98 | 2.20E-05 | SSPFKYSPLDFGR  | Phospho (ST) | 0.0000001000000.0 | JC_Synth_SCX_6.2496.2496.3.dta |
| SXPFKXSPLXFGFR[9 1 3 0 1827 | 1 | 547.5878 | 1639.742 | 3 | 33.89 | 0.00092  | SYPFKDSPLFGR   | Phospho (ST) | 0.0000001000000.0 | JC_Synth_SCX_7.2904.2904.3.dta |
| SXPFKXSPLXFGFR[4 7 3 0 947  | 1 | 507.5808 | 1519.721 | 3 | 30.8  | 0.002    | SGPFKTSPLFGR   | Phospho (ST) | 0.0000001000000.0 | JC_Synth_SCX_7.2741.2741.3.dta |
| SXPFKXSPLXFGFR[7 9 3 0 1587 | 1 | 813.8886 | 1625.763 | 2 | 30.45 | 0.0019   | STPFKYSPLFGR   | Phospho (ST) | 0.0000001000000.0 | JC_Synth_SCX_7.2973.2973.2.dta |
| SXPFKXSPLXFGFR[4 0 7 0 815  | 1 | 482.2373 | 1443.69  | 3 | 44.57 | 0.00014  | SGPFKASPLTFGR  | Phospho (ST) | 0.0000001000000.0 | JC_Synth_SCX_7.2495.2495.3.dta |
| SXPFKXSPLXFGFR[6 6 4 1 1330 | 1 | 473.5623 | 1417.665 | 3 | 38.05 | 0.00094  | SSPFKYSPLGFGK  | Phospho (ST) | 0.0000001000000.0 | JC_Synth_SCX_7.2383.2383.3.dta |
| SXPFKXSPLXFGFR[6 5 6 0 1313 | 1 | 751.8742 | 1501.734 | 2 | 54.11 | 5.80E-06 | SSPFKLSPLFGR   | Phospho (ST) | 0.0000001000000.0 | JC_Synth_SCX_7.2919.2919.2.dta |
| GPSGXVSAQLXR[9 4 7 0 1895   | 1 | 686.8169 | 1371.619 | 2 | 46.53 | 0.00012  | GPSGYVSGAQLTR  | Phospho (ST) | 0.0000001000000.0 | JC_Synth_SCX_7.2006.2006.2.dta |
| SXPFKXSPLXFGFR[3 8 4 0 769  | 1 | 759.8793 | 1517.744 | 2 | 29.39 | 0.0012   | SFPFKYSPLGFGR  | Phospho (ST) | 0.0000001000000.0 | JC_Synth_SCX_7.3047.3047.2.dta |
| SXPFKXSPLXFGFR[6 5 4 0 1309 | 1 | 491.5817 | 1471.723 | 3 | 32.32 | 0.0018   | SSPFKLSPLGFGR  | Phospho (ST) | 0.0000001000000.0 | JC_Synth_SCX_7.2909.2909.3.dta |
| SXPFKXSPLXFGFR[9 6 9 0 1939 | 1 | 543.5888 | 1627.745 | 3 | 30.27 | 0.0029   | SYPFKSSPLVFGR  | Phospho (ST) | 0.0000001000000.0 | JC_Synth_SCX_7.2671.2671.3.dta |
| SXPFKXSPLXFGFR[5 5 6 0 1113 | 1 | 764.9004 | 1527.786 | 2 | 28.54 | 0.0022   | SLPFKLSPLSFGR  | Phospho (ST) | 0.0000001000000.0 | JC_Synth_SCX_7.3140.3140.2.dta |
| SXPFKXSPLXFGFR[8 6 0 0 1731 | 1 | 757.8926 | 1513.771 | 2 | 32.14 | 0.00092  | SYPFKSSPLFGR   | Phospho (ST) | 0.0000001000000.0 | JC_Synth_SCX_7.2993.2993.2.dta |
| SXPFKXSPLXFGFR[4 9 0 0 981  | 1 | 502.91   | 1505.708 | 3 | 45.7  | 8.10E-05 | SGPFKYSPLAFGR  | Phospho (ST) | 0.0000001000000.0 | JC_Synth_SCX_7.2700.2700.3.dta |
| SXPFKXSPLXFGFR[7 6 6 1 1534 | 1 | 488.238  | 1461.692 | 3 | 35.13 | 0.002    | STPFKYSPLFGR   | Phospho (ST) | 0.0000001000000.0 | JC_Synth_SCX_7.2198.2198.3.dta |
| SXPFKXSPLXFGFR[6 4 4 0 1289 | 1 | 708.838  | 1415.662 | 2 | 40.94 | 0.00042  | SSPFKSGPLFGR   | Phospho (ST) | 0.0000001000000.0 | JC_Synth_SCX_7.2427.2427.2.dta |
| SXPFKXSPLXFGFR[4 2 9 0 859  | 1 | 522.2453 | 1563.714 | 3 | 42.28 | 0.00034  | SGPFKESPLVFGR  | Phospho (ST) | 0.0000001000000.0 | JC_Synth_SCX_7.2569.2569.3.dta |
| SXPFKXSPLXFGFR[9 9 6 0 1993 | 1 | 543.5891 | 1627.746 | 3 | 33.19 | 0.0015   | SYPFKYSPLFGR   | Phospho (ST) | 0.0000001000000.0 | JC_Synth_SCX_7.2815.2815.3.dta |
| SXPFKXSPLXFGFR[2 9 8 0 597  | 1 | 536.261  | 1605.761 | 3 | 31.09 | 0.0037   | SEPFKYSPLVFGR  | Phospho (ST) | 0.0000001000000.0 | JC_Synth_SCX_7.2801.2801.3.dta |
| SXPFKXSPLXFGFR[4 8 3 0 967  | 1 | 506.9223 | 1517.745 | 3 | 29.15 | 0.0012   | SGPFKYSPLFGR   | Phospho (ST) | 0.0000001000000.0 | JC_Synth_SCX_7.3048.3048.3.dta |
| SXPFKXSPLXFGFR[6 3 4 0 1269 | 1 | 502.9102 | 1505.709 | 3 | 55.39 | 8.70E-06 | SSPFKFSPLGFGR  | Phospho (ST) | 0.0000001000000.0 | JC_Synth_SCX_7.2977.2977.3.dta |
| SXPFKXSPLXFGFR[6 1 9 0 1239 | 1 | 527.577  | 1579.709 | 3 | 46.94 | 0.00011  | SSPFKDSPLVFGR  | Phospho (ST) | 0.0000001000000.0 | JC_Synth_SCX_7.2574.2574.3.dta |
| SXPFKXSPLXFGFR[4 5 0 0 901  | 1 | 728.8719 | 1455.729 | 2 | 37.51 | 0.00061  | SGPFKLSPLAFGR  | Phospho (ST) | 0.0000001000000.0 | JC_Synth_SCX_7.2911.2911.2.dta |
| SXPFKXSPLXFGFR[0 1 9 0 39   | 1 | 782.8645 | 1563.715 | 2 | 30.95 | 0.0047   | SAPFKDSPLVFGR  | Phospho (ST) | 0.0000001000000.0 | JC_Synth_SCX_7.2558.2558.2.dta |
| SXPFKXSPLXFGFR[0 3 5 0 71   | 1 |          |          |   |       |          |                |              |                   |                                |

|               |           |      |   |          |          |   |       |          |               |              |                   |                                |
|---------------|-----------|------|---|----------|----------|---|-------|----------|---------------|--------------|-------------------|--------------------------------|
| SXPFKXSPLXFRG | [3 3 0 0] | 661  | 1 | 527.5947 | 1579.762 | 3 | 23.53 | 0.0053   | SXPFKXSPLAFGR | Phospho (ST) | 0.0000001000000.0 | JC_Synth_SCX_7.3269.3269.3.dta |
| SXPFKXSPLXFRG | [0 1 5 0] | 31   | 1 | 757.8755 | 1513.737 | 2 | 34.05 | 0.0024   | SAPFKDSPLLFGR | Phospho (ST) | 0.0000001000000.0 | JC_Synth_SCX_7.2676.2676.2.dta |
| SXPFKXSPLXFRG | [1 7 9 0] | 359  | 1 | 532.2495 | 1593.727 | 3 | 33.7  | 0.0024   | SDPFKDSPLVFGR | Phospho (ST) | 0.0000001000000.0 | JC_Synth_SCX_7.2568.2568.3.dta |
| SXPFKXSPLXFRG | [9 9 4 0] | 1989 | 1 | 799.8757 | 1597.737 | 2 | 32.05 | 0.001    | SYPFKYSPLGFGR | Phospho (ST) | 0.0000001000000.0 | JC_Synth_SCX_7.2795.2795.2.dta |
| SXPFKXSPLXFRG | [1 3 0 0] | 261  | 1 | 516.9143 | 1547.721 | 3 | 35.96 | 0.00091  | SDPFKDSPLAFGR | Phospho (ST) | 0.0000001000000.0 | JC_Synth_SCX_7.3071.3071.3.dta |
| SXPFKXSPLXFRG | [4 6 3 0] | 927  | 1 | 753.8625 | 1505.71  | 2 | 44.64 | 0.0001   | SGPFKKSPLFFGR | Phospho (ST) | 0.0000001000000.0 | JC_Synth_SCX_7.2739.2739.2.dta |
| SXPFKXSPLXFRG | [9 4 3 0] | 1887 | 1 | 791.8782 | 1581.742 | 2 | 39.69 | 0.00011  | SYPFKYSPLFFGR | Phospho (ST) | 0.0000001000000.0 | JC_Synth_SCX_7.2862.2862.2.dta |
| SXPFKXSPLXFRG | [4 9 3 0] | 987  | 1 | 528.2546 | 1581.742 | 3 | 31.15 | 0.00077  | SGPFKYSPLFFGR | Phospho (ST) | 0.0000001000000.0 | JC_Synth_SCX_7.2995.2995.3.dta |
| SXPFKXSPLXFRG | [0 0 8 0] | 17   | 1 | 728.8729 | 1455.731 | 2 | 29.62 | 0.0038   | SAPFKASPLVFGR | Phospho (ST) | 0.0000001000000.0 | JC_Synth_SCX_7.2599.2599.2.dta |
| SXPFKXSPLXFRG | [1 7 2 1] | 346  | 1 | 511.5739 | 1531.7   | 3 | 28.33 | 0.0057   | SDPFKDSPLFEGK | Phospho (ST) | 0.0000001000000.0 | JC_Synth_SCX_7.2456.2456.3.dta |
| SXPFKXSPLXFRG | [6 8 8 1] | 1378 | 1 | 736.8829 | 1471.751 | 2 | 27.1  | 0.0049   | SSPFKYSPLVFGR | Phospho (ST) | 0.0000001000000.0 | JC_Synth_SCX_7.2822.2822.2.dta |
| SXPFKXSPLXFRG | [1 9 9 0] | 399  | 1 | 552.9215 | 1655.743 | 3 | 52.04 | 1.50E-05 | SDPFKYSPLVFGR | Phospho (ST) | 0.0000001000000.0 | JC_Synth_SCX_7.2852.2852.3.dta |
| SXPFKXSPLXFRG | [9 9 9 1] | 2000 | 1 | 559.5983 | 1675.773 | 3 | 33.94 | 0.00073  | SYPFKYSPLVFGR | Phospho (ST) | 0.0000001000000.0 | JC_Synth_SCX_7.2845.2845.3.dta |
| SXPFKXSPLXFRG | [4 4 0 0] | 881  | 1 | 467.5634 | 1399.669 | 3 | 57.1  | 1.90E-05 | SGPFKGSPLAFGR | Phospho (ST) | 0.0000001000000.0 | JC_Synth_SCX_7.2451.2451.3.dta |
| SXPFKXSPLXFRG | [9 8 3 0] | 1967 | 1 | 812.902  | 1623.789 | 2 | 44.76 | 4.50E-05 | SYPFKYSPLFFGR | Phospho (ST) | 0.0000001000000.0 | JC_Synth_SCX_7.3139.3139.2.dta |
| SXPFKXSPLXFRG | [4 5 5 0] | 911  | 1 | 500.2668 | 1497.779 | 3 | 62.53 | 8.40E-07 | SGPFKLSPLFFGR | Phospho (ST) | 0.0000001000000.0 | JC_Synth_SCX_7.3163.3163.3.dta |
| GPSGXVSAQQLXR | [5 8 5 0] | 1171 | 1 | 688.8704 | 1375.726 | 2 | 45.4  | 5.60E-05 | GPSGLVSAQQLR  | Phospho (ST) | 0.0000001000000.0 | JC_Synth_SCX_7.3281.3281.2.dta |
| SXPFKXSPLXFRG | [6 4 9 0] | 1299 | 1 | 508.2426 | 1521.706 | 3 | 45.27 | 6.20E-05 | SSPFKGSPLVFGR | Phospho (ST) | 0.0000001000000.0 | JC_Synth_SCX_7.2532.2532.3.dta |
| SXPFKXSPLXFRG | [9 3 0 0] | 1861 | 1 | 532.9266 | 1595.758 | 3 | 40.69 | 0.00012  | SYPFKFSPLAFGR | Phospho (ST) | 0.0000001000000.0 | JC_Synth_SCX_7.3079.3079.3.dta |
| SXPFKXSPLXFRG | [6 9 3 0] | 1387 | 1 | 538.2583 | 1611.753 | 3 | 58.49 | 2.50E-06 | SSPFKYSPLFFGR | Phospho (ST) | 0.0000001000000.0 | JC_Synth_SCX_7.3187.3187.3.dta |
| SXPFKXSPLXFRG | [0 9 0 0] | 199  | 1 | 538.2583 | 1611.753 | 3 | 50.91 | 1.50E-05 | SAPFKYSPLVFGR | Phospho (ST) | 0.0000001000000.0 | JC_Synth_SCX_7.2758.2758.3.dta |
| SXPFKXSPLXFRG | [6 6 1 1] | 1324 | 1 | 492.8986 | 1475.674 | 3 | 33.49 | 0.0015   | SSPFKKSPLDFGK | Phospho (ST) | 0.0000001000000.0 | JC_Synth_SCX_7.2462.2462.3.dta |
| SXPFKXSPLXFRG | [7 6 4 1] | 1530 | 1 | 478.2353 | 1431.684 | 3 | 57.41 | 9.50E-06 | SYPFKYSPLFFGR | Phospho (ST) | 0.0000001000000.0 | JC_Synth_SCX_7.2373.2373.2.dta |
| SXPFKXSPLXFRG | [0 4 4 1] | 90   | 1 | 686.8386 | 1371.663 | 2 | 27.12 | 0.0055   | SAPFKGSPLFGFK | Phospho (ST) | 0.0000001000000.0 | JC_Synth_SCX_7.2365.2365.2.dta |
| SXPFKXSPLXFRG | [1 9 3 0] | 387  | 1 | 547.59   | 1639.748 | 3 | 54.22 | 8.50E-06 | SDPFKYSPLFFGR | Phospho (ST) | 0.0000001000000.0 | JC_Synth_SCX_7.3059.3059.3.dta |
| SXPFKXSPLXFRG | [0 9 6 1] | 194  | 1 | 503.5792 | 1507.716 | 3 | 46.63 | 0.00016  | SAPFKYSPLSFGK | Phospho (ST) | 0.0000001000000.0 | JC_Synth_SCX_7.2655.2655.3.dta |
| SXPFKXSPLXFRG | [9 4 9 0] | 1899 | 1 | 533.5865 | 1597.738 | 3 | 49.02 | 1.70E-05 | SYPFKGSPLVFGR | Phospho (ST) | 0.0000001000000.0 | JC_Synth_SCX_7.2660.2660.3.dta |
| SXPFKXSPLXFRG | [6 3 5 0] | 1271 | 1 | 521.5986 | 1561.774 | 3 | 59.38 | 3.60E-06 | SSPFKYSPLFFGR | Phospho (ST) | 0.0000001000000.0 | JC_Synth_SCX_7.3187.3187.3.dta |
| SXPFKXSPLXFRG | [4 9 4 0] | 989  | 1 | 498.2392 | 1491.696 | 3 | 40.52 | 0.0002   | SGPFKYSPLGFGR | Phospho (ST) | 0.0000001000000.0 | JC_Synth_SCX_7.2684.2684.3.dta |
| SXPFKXSPLXFRG | [6 3 9 1] | 1280 | 1 | 528.923  | 1583.747 | 3 | 34.25 | 0.0014   | SSPFKFSPLVFGR | Phospho (ST) | 0.0000001000000.0 | JC_Synth_SCX_7.3020.3020.3.dta |
| SXPFKXSPLXFRG | [9 7 3 0] | 1987 | 1 | 844.8998 | 1687.785 | 2 | 57.07 | 2.00E-06 | SYPFKYSPLFFGR | Phospho (ST) | 0.0000001000000.0 | JC_Synth_SCX_7.3062.3062.2.dta |
| SXPFKXSPLXFRG | [9 0 3 0] | 1807 | 1 | 532.9269 | 1595.759 | 3 | 43.01 | 7.30E-05 | SYPFKASPLFFGR | Phospho (ST) | 0.0000001000000.0 | JC_Synth_SCX_7.2944.2944.3.dta |
| SXPFKXSPLXFRG | [5 3 9 0] | 1079 | 1 | 546.9426 | 1637.806 | 3 | 28.87 | 0.0018   | SLPFKYSPLVFGR | Phospho (ST) | 0.0000001000000.0 | JC_Synth_SCX_7.3158.3158.3.dta |
| SXPFKXSPLXFRG | [0 4 3 0] | 87   | 1 | 497.5796 | 1489.717 | 3 | 52.7  | 2.10E-05 | SAPFKYSPLFFGR | Phospho (ST) | 0.0000001000000.0 | JC_Synth_SCX_7.2727.2727.3.dta |
| SXPFKXSPLXFRG | [4 3 4 0] | 869  | 1 | 492.9077 | 1475.701 | 3 | 59.06 | 5.00E-06 | SGPFKFSPLGFGR | Phospho (ST) | 0.0000001000000.0 | JC_Synth_SCX_7.2971.2971.3.dta |
| SXPFKXSPLXFRG | [3 3 3 0] | 667  | 1 | 552.9391 | 1655.796 | 3 | 25.88 | 0.0026   | SYPFKYSPLFFGR | Phospho (ST) | 0.0000001000000.0 | JC_Synth_SCX_7.3499.3499.3.dta |
| SXPFKXSPLXFRG | [4 5 3 1] | 908  | 1 | 752.8861 | 1503.758 | 2 | 36.65 | 0.00039  | SGPFKLSPLFFGK | Phospho (ST) | 0.0000001000000.0 | JC_Synth_SCX_7.3177.3177.2.dta |
| SXPFKXSPLXFRG | [9 5 3 0] | 1907 | 1 | 546.9427 | 1637.806 | 3 | 54.33 | 5.00E-06 | SYPFKLSPLFFGR | Phospho (ST) | 0.0000001000000.0 | JC_Synth_SCX_7.3291.3291.3.dta |
| SXPFKXSPLXFRG | [4 0 5 0] | 811  | 1 | 728.8735 | 1455.732 | 2 | 31.68 | 0.0023   | SGPFKASPLFFGR | Phospho (ST) | 0.0000001000000.0 | JC_Synth_SCX_7.2750.2750.2.dta |
| SXPFKXSPLXFRG | [0 6 0 1] | 122  | 1 | 472.9039 | 1415.69  | 3 | 51.91 | 3.90E-05 | SAPFKSPLAFGR  | Phospho (ST) | 0.0000001000000.0 | JC_Synth_SCX_7.2376.2376.3.dta |
| SXPFKXSPLXFRG | [4 4 5 0] | 891  | 1 | 481.5796 | 1441.717 | 3 | 59.39 | 7.40E-06 | SGPFKGSPLFFGR | Phospho (ST) | 0.0000001000000.0 | JC_Synth_SCX_7.2668.2668.3.dta |
| SXPFKXSPLXFRG | [1 3 5 0] | 271  | 1 | 530.9305 | 1589.77  | 3 | 34.77 | 0.00095  | SDPFKYSPLFFGR | Phospho (ST) | 0.0000001000000.0 | JC_Synth_SCX_7.3267.3267.3.dta |
| SXPFKXSPLXFRG | [4 5 3 0] | 907  | 1 | 511.5953 | 1531.764 | 3 | 56.11 | 8.10E-06 | SGPFKLSPLFFGR | Phospho (ST) | 0.0000001000000.0 | JC_Synth_SCX_7.3211.3211.3.dta |
| SXPFKXSPLXFRG | [4 4 9 0] | 899  | 1 | 498.2394 | 1491.696 | 3 | 44.68 | 7.70E-05 | SGPFKYSPLVFGR | Phospho (ST) | 0.0000001000000.0 | JC_Synth_SCX_7.2533.2533.3.dta |
| SXPFKXSPLXFRG | [9 9 5 0] | 1991 | 1 | 552.2744 | 1653.801 | 3 | 53.58 | 4.40E-06 | SYPFKYSPLLFRG | Phospho (ST) | 0.0000001000000.0 | JC_Synth_SCX_7.3006.3006.3.dta |
| SXPFKXSPLXFRG | [6 3 3 0] | 1267 | 1 | 532.9271 | 1595.759 | 3 | 56.66 | 3.10E-06 | SSPFKFSPLFFGR | Phospho (ST) | 0.0000001000000.0 | JC_Synth_SCX_7.3244.3244.3.dta |
| SXPFKXSPLXFRG | [4 4 4 0] | 889  | 1 | 462.8921 | 1385.654 | 3 | 45.56 | 0.00022  | SGPFKASPLGFGR | Phospho (ST) | 0.0000001000000.0 | JC_Synth_SCX_7.2421.2421.3.dta |
| SXPFKXSPLXFRG | [2 6 4 1] | 1530 | 1 | 487.5673 | 1459.68  | 3 | 48.84 | 0.00011  | SEPFKKSPLFFGK | Phospho (ST) | 0.0000001000000.0 | JC_Synth_SCX_7.2372.2372.3.dta |
| SXPFKXSPLXFRG | [4 3 3 0] | 867  | 1 | 522.9236 | 1565.749 | 3 | 49.7  | 1.10E-05 | SGPFKFSPLFFGR | Phospho (ST) | 0.0000001000000.0 | JC_Synth_SCX_7.3235.3235.3.dta |
| SXPFKXSPLXFRG | [3 0 3 0] | 607  | 1 | 527.5955 | 1579.765 | 3 | 38.32 | 0.00022  | SYPFKASPLFFGR | Phospho (ST) | 0.0000001000000.0 | JC_Synth_SCX_7.3136.3136.3.dta |
| SXPFKXSPLXFRG | [5 5 3 0] | 1107 | 1 | 530.2831 | 1587.827 | 3 | 28.18 | 0.0015   | SLPFKLSPLFFGR | Phospho (ST) | 0.0000001000000.0 | JC_Synth_SCX_7.3419.3419.3.dta |
| SXPFKXSPLXFRG | [4 6 0 1] | 922  | 1 | 468.2321 | 1401.675 | 3 | 66.31 | 2.00E-06 | SGPFKSSPLAFGR | Phospho (ST) | 0.0000001000000.0 | JC_Synth_SCX_7.2400.2400.3.dta |
| SXPFKXSPLXFRG | [2 1 0 0] | 421  | 1 | 510.9064 | 1529.697 | 3 | 32.87 | 0.0047   | SEPFKDSPLAFGR | Phospho (ST) | 0.0000001000000.0 | JC_Synth_SCX_7.2478.2478.3.dta |
| SXPFKXSPLXFRG | [2 5 5 0] | 511  | 1 | 785.9081 | 1569.802 | 2 | 28.57 | 0.0051   | SEPFKLSPLFFGR | Phospho (ST) | 0.0000001000000.0 | JC_Synth_SCX_7.3173.3173.2.dta |
| GPSGXVSAQQLXR | [5 0 5 0] | 1011 | 1 | 674.8558 | 1347.697 | 2 | 59.29 | 2.10E-06 | GPSGLVSAQQLR  | Phospho (ST) | 0.0000001000000.0 | JC_Synth_SCX_8.2988.2988.2.dta |
| GPSGXVSAQQLXR | [5 9 8 0] | 1197 | 1 | 713.86   | 1425.706 | 2 | 54.02 | 8.30E-06 | GPSGLVSAQQLR  | Phospho (ST) | 0.0000001000000.0 | JC_Synth_SCX_8.2932.2932.2.dta |
| GPSGXVSAQQLXR | [1 6 0 0] | 321  | 1 | 662.7982 | 1323.582 | 2 | 53.72 | 1.70E-05 | GPSGDVSAQQLR  | Phospho (ST) | 0.0000001000000.0 | JC_Synth_SCX_8.2005.2005.2.dta |
| SXPFKXSPLXFRG | [4 0 5 1] | 812  | 1 | 476.9153 | 1427.724 | 3 | 47.67 | 4.10E-05 | SGPFKASPLFFGR | Phospho (ST) | 0.0000001000000.0 | JC_Synth_SCX_8.2712.2712.3.dta |
| GPSGXVSAQQLXR | [3 6 5 0] | 731  | 1 | 699.8406 | 1397.667 | 2 | 48.09 | 8.40E-05 | GPSGFVSAQQLR  | Phospho (ST) | 0.0000001000000.0 | JC_Synth_SCX_8.2805.2805.2.dta |
| GPSGXVSAQQLXR | [6 5 5 0] | 1311 | 1 | 682.851  | 1363.688 | 2 | 46.16 | 9.20E-05 | GPSGSVSAQQLR  | Phospho (ST) | 0.0000001000000.0 | JC_Synth_SCX_8.3067.3067.2.dta |
| GPSGXVSAQQLXR | [5 9 5 0] | 1191 | 1 | 720.8674 | 1439.72  | 2 | 41.52 | 0.00015  | GPSGLVSAQQLR  | Phospho (ST) | 0.0000001000000.0 | JC_Synth_SCX_8.3154.3154.2.dta |
| SXPFKXSPLXFRG | [4 4 3 0] | 887  | 1 | 492.9081 | 1475.703 | 3 | 40.97 | 0.00032  | SGPFKGSPLFFGR | Phospho (ST) | 0.0000001000000.0 | JC_Synth_SCX_8.2763.2763.3.dta |
| SXPFKXSPLXFRG | [4 4 3 0] | 869  | 1 | 738.8564 | 1475.698 | 2 | 39.72 | 0.00035  | SGPFKFSPLGFGR | Phospho (ST) | 0.0000001000000.0 | JC_Synth_SCX_8.2963.2963.3.dta |
| SXPFKXSPLXFRG | [4 4 6 0] | 893  | 1 | 472.8948 | 1415.663 | 3 | 41.69 | 0.00036  | SGPFKGSPLSFGK | Phospho (ST) | 0.0000001000000.0 | JC_Synth_SCX_8.2305.2305.3.dta |
| SXPFKXSPLXFRG | [4 0 0 0] | 801  | 1 | 472.2352 | 1413.684 | 3 | 41.59 | 0.0005   | SGPFKASPLAFGR | Phospho (ST) | 0.0000001000000.0 | JC_Synth_SCX_8.2534.2534.3.dta |
| SXPFKXSPLXFRG | [7 5 9 0] | 1519 | 1 | 796.8945 | 1591.775 | 2 | 18.9  | 0.037    | STPFKYSPLVFGR | Phospho (ST) | 0.0000001000000.0 | JC_Synth_SCX_9.2965.2965.2.dta |
| GPSGXVSAQQLXR | [5 6 5 0] | 1131 | 1 | 682.848  | 1363.681 | 2 | 41.41 | 0.00043  | GPSGLVSAQQLR  | Phospho (ST) | 0.0000001000000.0 | JC_Synth_SCX_9.2751.2751.2.dta |
| GPSGXVSAQQLXR | [1 4 1 0] | 283  | 1 | 669.7858 | 1337.557 | 2 | 32.81 | 0.00052  | GPSGDVSGAQLDR | Phospho (ST) | 0.0000001000000.0 | JC_Synth_SCX_9.1955.1955.2.dta |
| GPSGXVSAQQLXR | [6 4 1 0] | 1283 | 1 | 655.7884 | 1309.562 | 2 | 35.07 | 0.0014   | GPSGSVSAQQLDR | Phospho (ST) | 0.0000001000000.0 | JC_Synth_SCX_9.1940.1940.2.dta |
| SXPFKXSPLXFRG | [1 6 2 0] | 325  | 1 | 773.8483 | 1545.682 | 2 | 30.14 | 0.0034   | SDPFKKSPLFEGK | Phospho (ST) | 0.0000001000000.0 | JC_Synth_SCX_9.2513.2513.2.dta |
| GPSGXVSAQQLXR | [6 9 5 0] | 1391 | 1 | 707.838  | 1413.661 | 2 | 26.41 | 0.0099   | GPSGSVSAQQLR  | Phospho (ST) | 0.0000001000000.0 | JC_Synth_SCX_9.2684.2684.2.dta |
| SXPFKXSPLXFRG | [4 6 3 0] | 927  | 1 | 753.8589 | 1505.703 | 2 | 17.34 | 0.0      | SGPFKKSPLFFGR | Phospho (ST) | 0.0000001000000.0 | JC_Synth_SCX_9.2739.2739.2.dta |
| GPSGXVSAQQLXR | [2 0 7 0] | 415  | 1 | 676.8124 | 1351.61  | 2 | 41.28 | 0.00018  | GPSGSVSAQQLTR | Phospho (ST) | 0.0000001000000.0 | JC_Synth_SCX_9.2069.2069.2.dta |
| SXPFKXSPLXFRG | [0 6 5 0] | 131  | 1 | 743.8748 | 1485.735 | 2 | 20.68 | 0.04     | SAPFKKSPLLFGR |              |                   |                                |

|               |           |      |   |          |          |   |       |          |               |              |                  |                                |
|---------------|-----------|------|---|----------|----------|---|-------|----------|---------------|--------------|------------------|--------------------------------|
| SXPFKXSPLXFRG | [8 0 0 0] | 1601 | 1 | 728.8715 | 1455.729 | 2 | 26.95 | 0.007    | SVPFKASPLAFGR | Phospho (ST) | 0.00000010000000 | JC_Synth_SCX_9.2587.2587.2.dta |
| SXPFKXSPLXFRG | [9 0 1 0] | 1803 | 1 | 782.864  | 1563.713 | 2 | 21.65 | 0.04     | SYPFKASPLDFGR | Phospho (ST) | 0.00000010000000 | JC_Synth_SCX_9.2691.2691.2.dta |
| GPSGVXSQAQLXR | [5 6 1 1] | 1124 | 1 | 669.8192 | 1337.624 | 2 | 29.99 | 0.0039   | GPSGLVSSAQLDK | Phospho (ST) | 0.00000010000000 | JC_Synth_SCX_9.2284.2284.2.dta |
| SXPFKXSPLXFRG | [4 9 4 1] | 1990 | 2 | 732.8503 | 1463.686 | 2 | 32.02 | 0.0052   | SGPFKYSPLFGFK | Phospho (ST) | 0.00000010000000 | JC_Synth_SCX_9.2637.2637.2.dta |
| GPSGVXSQAQLXR | [0 4 6 1] | 194  | 2 | 619.793  | 1237.571 | 2 | 44.62 | 0.00012  | GPSGAVSQAQLSK | Phospho (ST) | 0.00000010000000 | JC_Synth_SCX_9.1929.1929.2.dta |
| GPSGVXSQAQLXR | [6 1 8 1] | 1238 | 1 | 662.8114 | 1323.608 | 2 | 26.68 | 0.0064   | GPSGSVSDAQLVK | Phospho (ST) | 0.00000010000000 | JC_Synth_SCX_9.2089.2089.2.dta |
| SXPFKXSPLXFRG | [4 4 4 0] | 889  | 2 | 693.8325 | 1385.651 | 2 | 26.1  | 0.015    | SGPFKGSPLDFGR | Phospho (ST) | 0.00000010000000 | JC_Synth_SCX_9.2413.2413.2.dta |
| GPSGVXSQAQLXR | [6 6 4 1] | 1330 | 1 | 627.7905 | 1253.566 | 2 | 28.49 | 0.0079   | GPSGSVSSAQLGK | Phospho (ST) | 0.00000010000000 | JC_Synth_SCX_9.1930.1930.2.dta |
| GPSGVXSQAQLXR | [0 0 4 0] | 19   | 2 | 625.7986 | 1249.583 | 2 | 62.29 | 2.90E-06 | GPSGAVSAAQLGR | Phospho (ST) | 0.00000010000000 | JC_Synth_SCX_9.2063.2063.2.dta |
| GPSGVXSQAQLXR | [8 8 8 1] | 1778 | 2 | 660.8504 | 1319.686 | 2 | 43.77 | 0.00014  | GPSGVVSAQLVK  | Phospho (ST) | 0.00000010000000 | JC_Synth_SCX_9.2776.2776.2.dta |
| GPSGVXSQAQLXR | [9 5 3 0] | 1907 | 1 | 737.8588 | 1473.703 | 2 | 25.42 | 0.01     | GPSGVVSAQLFR  | Phospho (ST) | 0.00000010000000 | JC_Synth_SCX_9.3366.3366.2.dta |
| GPSGVXSQAQLXR | [5 0 5 0] | 1011 | 2 | 674.8535 | 1347.693 | 2 | 72.27 | 5.90E-08 | GPSGLVSSAQLLR | Phospho (ST) | 0.00000010000000 | JC_Synth_SCX_9.2969.2969.2.dta |
| GPSGVXSQAQLXR | [6 7 1 1] | 1344 | 2 | 663.8011 | 1325.588 | 2 | 30.69 | 0.0028   | GPSGSVSTAQLDK | Phospho (ST) | 0.00000010000000 | JC_Synth_SCX_9.1960.1960.2.dta |
| SXPFKXSPLXFRG | [4 0 9 1] | 1820 | 2 | 739.8583 | 1477.702 | 2 | 22.55 | 0.039    | SGPFKASPLYFGK | Phospho (ST) | 0.00000010000000 | JC_Synth_SCX_9.2556.2556.2.dta |
| GPSGVXSQAQLXR | [1 4 0 1] | 1282 | 1 | 633.7906 | 1265.567 | 2 | 35.05 | 0.0014   | GPSGDVSSAQLAK | Phospho (ST) | 0.00000010000000 | JC_Synth_SCX_9.1944.1944.2.dta |
| SXPFKXSPLXFRG | [6 4 8 1] | 1298 | 2 | 715.8583 | 1429.702 | 2 | 31.17 | 0.0049   | SPPFKGSPLVFGK | Phospho (ST) | 0.00000010000000 | JC_Synth_SCX_9.2675.2675.2.dta |
| SXPFKXSPLXFRG | [4 0 3 0] | 807  | 3 | 497.5784 | 1489.714 | 3 | 26.73 | 0.0054   | SGPFKASPLFFGR | Phospho (ST) | 0.00000010000000 | JC_Synth_SCX_9.2813.2813.3.dta |
| SXPFKXSPLXFRG | [9 9 1 0] | 1983 | 2 | 828.8774 | 1655.74  | 2 | 24.44 | 0.0088   | SYPFKASPLDFGR | Phospho (ST) | 0.00000010000000 | JC_Synth_SCX_9.2835.2835.2.dta |
| SXPFKXSPLXFRG | [4 5 0 0] | 901  | 1 | 486.2503 | 1455.729 | 3 | 34.89 | 0.0011   | SGPFKASPLAFGR | Phospho (ST) | 0.00000010000000 | JC_Synth_SCX_9.2877.2877.3.dta |
| SXPFKXSPLXFRG | [0 5 4 0] | 109  | 2 | 728.8718 | 1455.729 | 2 | 29.31 | 0.004    | SAPFKLSPLGFR  | Phospho (ST) | 0.00000010000000 | JC_Synth_SCX_9.2874.2874.2.dta |
| GPSGVXSQAQLXR | [6 6 0 1] | 1322 | 2 | 634.7985 | 1267.582 | 2 | 50.89 | 5.80E-05 | GPSGSVSSAQLAK | Phospho (ST) | 0.00000010000000 | JC_Synth_SCX_9.1937.1937.2.dta |
| SXPFKXSPLXFRG | [4 0 9 0] | 819  | 2 | 753.8615 | 1505.709 | 2 | 20.75 | 0.025    | SGPFKASPLYFGR | Phospho (ST) | 0.00000010000000 | JC_Synth_SCX_9.2595.2595.2.dta |
| SXPFKXSPLXFRG | [4 4 7 1] | 1896 | 2 | 701.8428 | 1401.671 | 2 | 33.5  | 0.0028   | SGPFKGSPLTFGK | Phospho (ST) | 0.00000010000000 | JC_Synth_SCX_9.2388.2388.2.dta |
| GPSGVXSQAQLXR | [5 0 0 0] | 1001 | 1 | 653.8301 | 1305.646 | 2 | 16.15 | 0.024    | GPSGLVSSAQLAR | Phospho (ST) | 0.00000010000000 | JC_Synth_SCX_9.2517.2517.2.dta |
| GPSGVXSQAQLXR | [0 4 1 0] | 183  | 2 | 647.7938 | 1293.573 | 2 | 44.39 | 0.00044  | GPSGAVSQAQLDR | Phospho (ST) | 0.00000010000000 | JC_Synth_SCX_9.1975.1975.2.dta |
| SXPFKXSPLXFRG | [0 3 5 0] | 71   | 3 | 516.2661 | 1545.776 | 3 | 18.82 | 0.013    | SAPFKSPLLFGR  | Phospho (ST) | 0.00000010000000 | JC_Synth_SCX_9.3153.3153.3.dta |
| GPSGVXSQAQLXR | [8 8 3 1] | 1768 | 1 | 684.8506 | 1367.687 | 2 | 23.17 | 0.019    | GPSGVVSAQLFK  | Phospho (ST) | 0.00000010000000 | JC_Synth_SCX_9.3159.3159.2.dta |
| GPSGVXSQAQLXR | [0 5 3 1] | 1108 | 2 | 677.8428 | 1353.671 | 2 | 30.68 | 0.0032   | GPSGAVSQAQLFK | Phospho (ST) | 0.00000010000000 | JC_Synth_SCX_9.3203.3203.2.dta |
| SXPFKXSPLXFRG | [0 5 4 1] | 110  | 2 | 714.8688 | 1427.723 | 2 | 34.39 | 0.00087  | SAPFKLSPLFGFK | Phospho (ST) | 0.00000010000000 | JC_Synth_SCX_9.2842.2842.2.dta |
| SXPFKXSPLXFRG | [4 5 3 1] | 1908 | 3 | 502.2588 | 1503.755 | 3 | 30.14 | 0.002    | SGPFKLSPLFFGK | Phospho (ST) | 0.00000010000000 | JC_Synth_SCX_9.3160.3160.3.dta |
| GPSGVXSQAQLXR | [3 3 8 1] | 1678 | 2 | 708.8506 | 1415.687 | 2 | 25.08 | 0.019    | GPSGVSFAQLVK  | Phospho (ST) | 0.00000010000000 | JC_Synth_SCX_9.3235.3235.2.dta |
| SXPFKXSPLXFRG | [0 3 3 1] | 168  | 2 | 776.8846 | 1551.755 | 2 | 19.82 | 0.011    | SAPFKFSPLFFGK | Phospho (ST) | 0.00000010000000 | JC_Synth_SCX_9.3184.3184.2.dta |
| SXPFKXSPLXFRG | [6 9 4 1] | 1390 | 2 | 747.856  | 1493.698 | 2 | 25.02 | 0.028    | SPPFKYSPLFGFK | Phospho (ST) | 0.00000010000000 | JC_Synth_SCX_9.2640.2640.2.dta |
| GPSGVXSQAQLXR | [6 1 6 1] | 1234 | 1 | 656.7935 | 1311.573 | 2 | 36.55 | 0.00052  | GPSGSVSDAQLSK | Phospho (ST) | 0.00000010000000 | JC_Synth_SCX_9.1922.1922.2.dta |
| GPSGVXSQAQLXR | [0 8 3 0] | 1167 | 2 | 684.8381 | 1367.662 | 2 | 40.12 | 0.00041  | GPSGAVSQAQLFR | Phospho (ST) | 0.00000010000000 | JC_Synth_SCX_9.2866.2866.2.dta |
| GPSGVXSQAQLXR | [0 2 1 0] | 43   | 2 | 683.8044 | 1365.594 | 2 | 26.73 | 0.019    | GPSGAVSQAQLDR | Phospho (ST) | 0.00000010000000 | JC_Synth_SCX_9.2036.2036.2.dta |
| SXPFKXSPLXFRG | [0 8 5 0] | 171  | 2 | 749.8955 | 1497.777 | 2 | 29.19 | 0.0018   | SAPFKVSPLLFGR | Phospho (ST) | 0.00000010000000 | JC_Synth_SCX_9.2951.2951.2.dta |
| SXPFKXSPLXFRG | [4 9 9 1] | 1000 | 1 | 785.8718 | 1569.729 | 2 | 24.25 | 0.017    | SGPFKYSPLYFGK | Phospho (ST) | 0.00000010000000 | JC_Synth_SCX_9.2724.2724.2.dta |
| SXPFKXSPLXFRG | [0 9 0 1] | 182  | 3 | 498.2467 | 1491.718 | 3 | 33.4  | 0.0026   | SAPFKYSPLAFGK | Phospho (ST) | 0.00000010000000 | JC_Synth_SCX_9.2937.2937.3.dta |
| GPSGVXSQAQLXR | [1 6 1 1] | 1324 | 2 | 670.791  | 1339.568 | 2 | 63.01 | 9.80E-07 | GPSGDVSSAQLDK | Phospho (ST) | 0.00000010000000 | JC_Synth_SCX_9.1941.1941.2.dta |
| GPSGVXSQAQLXR | [2 3 5 1] | 1472 | 2 | 706.8456 | 1411.677 | 2 | 32.92 | 0.0019   | GPSGEVSAQLLK  | Phospho (ST) | 0.00000010000000 | JC_Synth_SCX_9.3074.3074.2.dta |
| SXPFKXSPLXFRG | [0 0 5 0] | 111  | 2 | 735.8799 | 1469.745 | 2 | 23.17 | 0.0051   | SAPFKASPLLFGR | Phospho (ST) | 0.00000010000000 | JC_Synth_SCX_9.2720.2720.2.dta |
| GPSGVXSQAQLXR | [6 8 5 1] | 1372 | 1 | 661.8403 | 1321.666 | 2 | 35    | 0.0018   | GPSGSVSAQLLK  | Phospho (ST) | 0.00000010000000 | JC_Synth_SCX_9.2797.2797.2.dta |
| SXPFKXSPLXFRG | [4 5 6 1] | 1914 | 3 | 482.2467 | 1443.718 | 3 | 27.96 | 0.0069   | SGPFKLSPLFGFK | Phospho (ST) | 0.00000010000000 | JC_Synth_SCX_9.2855.2855.3.dta |
| SXPFKXSPLXFRG | [7 5 8 1] | 1518 | 2 | 750.8978 | 1499.781 | 2 | 34    | 0.00096  | STPFKLSPLVFGK | Phospho (ST) | 0.00000010000000 | JC_Synth_SCX_9.2976.2976.2.dta |
| SXPFKXSPLXFRG | [5 5 6 1] | 1114 | 1 | 500.9343 | 1499.781 | 3 | 22.44 | 0.014    | SLPFKLSPLFGK  | Phospho (ST) | 0.00000010000000 | JC_Synth_SCX_9.3084.3084.3.dta |
| GPSGVXSQAQLXR | [5 3 5 0] | 1071 | 2 | 712.8695 | 1423.725 | 2 | 61.69 | 6.80E-07 | GPSGLVSSAQLLR | Phospho (ST) | 0.00000010000000 | JC_Synth_SCX_9.3464.3464.2.dta |
| SXPFKXSPLXFRG | [5 9 2 0] | 1185 | 3 | 540.933  | 1619.777 | 3 | 23.35 | 0.014    | SLPFKYSPLFFGK | Phospho (ST) | 0.00000010000000 | JC_Synth_SCX_9.2891.2891.3.dta |
| GPSGVXSQAQLXR | [6 5 5 1] | 1312 | 2 | 668.8482 | 1335.682 | 2 | 33.76 | 0.0026   | GPSGSVLAQLLK  | Phospho (ST) | 0.00000010000000 | JC_Synth_SCX_9.3015.3015.2.dta |
| GPSGVXSQAQLXR | [8 5 8 1] | 1718 | 2 | 667.8586 | 1333.703 | 2 | 44.23 | 0.00015  | GPSGVVSAQLVK  | Phospho (ST) | 0.00000010000000 | JC_Synth_SCX_9.3034.3034.2.dta |
| GPSGVXSQAQLXR | [4 4 1 1] | 1884 | 1 | 626.783  | 1251.552 | 2 | 54.6  | 4.40E-05 | GPSGGVSGAQLDK | Phospho (ST) | 0.00000010000000 | JC_Synth_SCX_9.1939.1939.2.dta |
| SXPFKXSPLXFRG | [9 1 9 0] | 1839 | 3 | 552.9209 | 1655.741 | 3 | 34.5  | 0.00087  | SYPFKDSPLYFGR | Phospho (ST) | 0.00000010000000 | JC_Synth_SCX_9.2831.2831.3.dta |
| GPSGVXSQAQLXR | [2 5 5 1] | 1512 | 2 | 689.8535 | 1377.693 | 2 | 54.19 | 1.80E-05 | GPSGEVSAQLLK  | Phospho (ST) | 0.00000010000000 | JC_Synth_SCX_9.3071.3071.2.dta |
| GPSGVXSQAQLXR | [0 4 4 0] | 189  | 2 | 718.7911 | 1235.568 | 2 | 51.8  | 0.00011  | GPSGAVSQAQLGR | Phospho (ST) | 0.00000010000000 | JC_Synth_SCX_9.1976.1976.2.dta |
| GPSGVXSQAQLXR | [5 3 2 0] | 1065 | 2 | 620.8488 | 1439.683 | 2 | 46.2  | 7.80E-05 | GPSGLVSSAQLLR | Phospho (ST) | 0.00000010000000 | JC_Synth_SCX_9.2962.2962.2.dta |
| GPSGVXSQAQLXR | [3 5 6 1] | 1714 | 2 | 685.8404 | 1369.666 | 2 | 30.68 | 0.0044   | GPSGFVSAQLSK  | Phospho (ST) | 0.00000010000000 | JC_Synth_SCX_9.2898.2898.2.dta |
| GPSGVXSQAQLXR | [2 4 6 1] | 1494 | 2 | 648.7961 | 1295.578 | 2 | 38.38 | 0.00063  | GPSGEVSGAQLSK | Phospho (ST) | 0.00000010000000 | JC_Synth_SCX_9.1945.1945.2.dta |
| GPSGVXSQAQLXR | [5 8 8 0] | 1177 | 2 | 681.8617 | 1361.709 | 2 | 64.43 | 0.0067   | GPSGLVSSAQLVR | Phospho (ST) | 0.00000010000000 | JC_Synth_SCX_9.2991.2991.2.dta |
| GPSGVXSQAQLXR | [3 9 3 1] | 1788 | 2 | 740.8483 | 1479.682 | 2 | 23.71 | 0.042    | GPSGFVSAQLFK  | Phospho (ST) | 0.00000010000000 | JC_Synth_SCX_9.3234.3234.2.dta |
| SXPFKXSPLXFRG | [2 6 1 1] | 1524 | 2 | 759.8486 | 1517.683 | 2 | 18.47 | 0.03     | SEPFKSSPLDFGK | Phospho (ST) | 0.00000010000000 | JC_Synth_SCX_9.2436.2436.2.dta |
| SXPFKXSPLXFRG | [5 9 6 0] | 1193 | 2 | 789.8906 | 1577.767 | 2 | 24.59 | 0.0094   | SLPFKYSPLDFGR | Phospho (ST) | 0.00000010000000 | JC_Synth_SCX_9.2892.2892.2.dta |
| SXPFKXSPLXFRG | [9 7 9 0] | 1959 | 3 | 548.2612 | 1641.762 | 3 | 23.72 | 0.0083   | SYPFKYSPLYFGR | Phospho (ST) | 0.00000010000000 | JC_Synth_SCX_9.2755.2755.3.dta |
| GPSGVXSQAQLXR | [3 3 5 1] | 1672 | 2 | 715.8587 | 1429.703 | 2 | 36.46 | 0.00084  | GPSGFVSAQLLK  | Phospho (ST) | 0.00000010000000 | JC_Synth_SCX_9.3449.3449.2.dta |
| SXPFKXSPLXFRG | [6 5 0 0] | 1301 | 3 | 496.2541 | 1485.74  | 3 | 23.06 | 0.016    | SSPFKLSPLAFGR | Phospho (ST) | 0.00000010000000 | JC_Synth_SCX_9.2738.2738.3.dta |
| GPSGVXSQAQLXR | [6 4 4 1] | 1290 | 2 | 612.7856 | 1223.557 | 2 | 23.99 | 0.0098   | GPSGSVSGAQLGK | Phospho (ST) | 0.00000010000000 | JC_Synth_SCX_9.1933.1933.2.dta |
| SXPFKXSPLXFRG | [4 5 5 1] | 1912 | 3 | 490.9308 | 1469.771 | 3 | 28.05 | 0.0049   | SGPFKLSPLFFGK | Phospho (ST) | 0.00000010000000 | JC_Synth_SCX_9.3103.3103.3.dta |
| GPSGVXSQAQLXR | [0 8 3 1] | 1168 | 2 | 670.8352 | 1339.656 | 2 | 32.03 | 0.0034   | GPSGAVSQAQLFK | Phospho (ST) | 0.00000010000000 | JC_Synth_SCX_9.2979.2979.2.dta |
| GPSGVXSQAQLXR | [4 4 0 1] | 1882 | 2 | 640.7881 | 1207.562 | 2 | 34.82 | 0.00033  | GPSGGVSGAQLAK | Phospho (ST) | 0.00000010000000 | JC_Synth_SCX_9.1952.1952.2.dta |
| SXPFKXSPLXFRG | [7 8 2 1] | 1566 | 2 | 758.8772 | 1515.74  | 2 | 25.82 | 0.011    | STPFKYSPLFFGK | Phospho (ST) | 0.00000010000000 | JC_Synth_SCX_9.2633.2633.2.dta |
| SXPFKXSPLXFRG | [0 4 7 1] | 196  | 2 | 708.851  | 1415.687 | 2 | 23.22 | 0.029    | SAPFKGSPLTFGK | Phospho (ST) | 0.00000000100000 | JC_Synth_SCX_9.2357.2357.2.dta |
| GPSGVXSQAQLXR | [8 5 5 1] | 1712 | 2 | 674.8665 | 1347.719 | 2 | 38.21 | 0.00045  | GPSGLVSSAQLLK | Phospho (ST) | 0.00000010000000 | JC_Synth_SCX_9.3292.3292.2.dta |
| SXPFKXSPLXFRG | [5 5 5 1] | 1112 | 2 | 763.924  | 1525.834 | 2 | 15.02 | 0.031    | SLPFKLSPLFFGK | Phospho (ST) | 0.00000010000000 | JC_Synth_SCX_9.3328.3328.2.dta |
| GPSGVXSQAQLXR | [0 5 5 1] | 1112 | 1 | 660.8509 | 1319.687 | 2 | 52.58 | 1.80E-05 | GPSGAVSQAQLLK | Phospho (ST) | 0.00000010000000 | JC_Synth_SCX_9.3091.3091.2.dta |
| GPSGVXSQAQLXR | [3 5 9 0] | 719  | 2 | 737.8594 | 1473.704 | 2 | 39.77 | 0.00038  | GPSGFVSAQLYR  | Phospho (ST) | 0.00000010000000 | JC_Synth_SCX_9.3149.3149.2.dta |
| GPSGVXSQAQLXR | [3 3 5 0] | 1671 | 2 | 729.8619 | 1457.709 | 2 | 32.44 | 0.0015   | GPSGFVSAQLLR  | Phospho (ST) | 0.00             |                                |

|                            |   |          |          |   |       |          |                |              |                   |                                |
|----------------------------|---|----------|----------|---|-------|----------|----------------|--------------|-------------------|--------------------------------|
| SXPFKXSPLXFGR 4 5 2 0 905  | 1 | 505.586  | 1513.736 | 3 | 31.66 | 0.0042   | SGPFKLSPLFGR   | Phospho (ST) | 0.0000001000000.0 | JC_Synth_SCX_9.2888.2888.3.dta |
| SXPFKXSPLXFGR 5 1 5 0 1031 | 1 | 778.8989 | 1555.783 | 2 | 18.59 | 0.05     | SLPFKDSPLFGR   | Phospho (ST) | 0.0000001000000.0 | JC_Synth_SCX_9.2970.2970.2.dta |
| GPSGXVSAQXLXR 4 5 5 1 1912 | 1 | 653.8433 | 1305.672 | 2 | 37.06 | 0.00086  | GPSGGVSLAQLLK  | Phospho (ST) | 0.0000001000000.0 | JC_Synth_SCX_9.3053.3053.2.dta |
| SXPFKXSPLXFGR 9 9 2 1 1986 | 1 | 821.883  | 1641.751 | 2 | 20.6  | 0.01     | SYPFKYSPLEFGK  | Phospho (ST) | 0.0000001000000.0 | JC_Synth_SCX_9.2763.2763.2.dta |
| GPSGXVSAQXLXR 8 8 3 0 1767 | 1 | 698.8543 | 1395.694 | 2 | 42.44 | 5.70E-05 | GPSGVSVQAQLFR  | Phospho (ST) | 0.0000001000000.0 | JC_Synth_SCX_9.3193.3193.2.dta |
| GPSGXVSAQXLXR 5 4 5 0 1091 | 1 | 667.8464 | 1333.678 | 2 | 51.99 | 1.20E-05 | GPSGLVGAQLLR   | Phospho (ST) | 0.0000001000000.0 | JC_Synth_SCX_9.2733.2733.2.dta |
| SXPFKXSPLXFGR 6 8 8 1 1378 | 1 | 491.5909 | 1471.751 | 3 | 34.28 | 0.00093  | SSPFKYSPLEFGK  | Phospho (ST) | 0.0000001000000.0 | JC_Synth_SCX_9.2800.2800.3.dta |
| GPSGXVSAQXLXR 5 5 8 0 1117 | 1 | 688.8699 | 1375.725 | 2 | 59.95 | 2.00E-06 | GPSGLVSLAQLVR  | Phospho (ST) | 0.0000001000000.0 | JC_Synth_SCX_9.3252.3252.2.dta |
| SXPFKXSPLXFGR 4 5 4 0 909  | 1 | 481.5789 | 1441.715 | 3 | 50.16 | 6.20E-05 | SGPFKLSPLFGR   | Phospho (ST) | 0.0000001000000.0 | JC_Synth_SCX_9.2875.2875.3.dta |
| GPSGXVSAQXLXR 5 8 3 1 1168 | 1 | 691.8591 | 1381.704 | 2 | 30.05 | 0.0036   | GPSGLVSAQLFK   | Phospho (ST) | 0.0000001000000.0 | JC_Synth_SCX_9.3338.3338.2.dta |
| SXPFKXSPLXFGR 9 8 9 0 1979 | 1 | 547.6018 | 1639.784 | 3 | 29.25 | 0.0012   | SYPFKVSPLYFGR  | Phospho (ST) | 0.0000001000000.0 | JC_Synth_SCX_9.2911.2911.3.dta |
| GPSGXVSAQXLXR 9 8 5 1 1972 | 1 | 699.8566 | 1397.699 | 2 | 40.53 | 0.00044  | GPSGVSVQAQLLK  | Phospho (ST) | 0.0000001000000.0 | JC_Synth_SCX_9.3017.3017.2.dta |
| SXPFKXSPLXFGR 0 5 6 0 113  | 1 | 496.2544 | 1485.741 | 3 | 28.63 | 0.0045   | SAPFKLSPLSFGK  | Phospho (ST) | 0.0000001000000.0 | JC_Synth_SCX_9.2880.2880.3.dta |
| GPSGXVSAQXLXR 5 2 5 1 1052 | 1 | 689.8541 | 1377.694 | 2 | 22.16 | 0.029    | GPSGLVSEAQLLK  | Phospho (ST) | 0.0000001000000.0 | JC_Synth_SCX_9.2811.2811.2.dta |
| GPSGXVSAQXLXR 5 9 5 0 1191 | 1 | 720.8676 | 1439.721 | 2 | 72.6  | 1.20E-07 | GPSGLVSYAQLLR  | Phospho (ST) | 0.0000001000000.0 | JC_Synth_SCX_9.3135.3135.2.dta |
| SXPFKXSPLXFGR 9 9 9 1 2000 | 1 | 559.5981 | 1675.773 | 3 | 21.5  | 0.013    | SYPFKYSPLEFGK  | Phospho (ST) | 0.0000001000000.0 | JC_Synth_SCX_9.2826.2826.3.dta |
| GPSGXVSAQXLXR 5 5 3 1 1108 | 1 | 698.8671 | 1395.72  | 2 | 21.78 | 0.016    | GPSGLVSLAQLFK  | Phospho (ST) | 0.0000001000000.0 | JC_Synth_SCX_9.3560.3560.2.dta |
| SXPFKXSPLXFGR 7 5 0 1 1502 | 1 | 736.8828 | 1471.751 | 2 | 17.26 | 0.047    | STPFKLSPLAFGK  | Phospho (ST) | 0.0000001000000.0 | JC_Synth_SCX_9.2863.2863.2.dta |
| SXPFKXSPLXFGR 0 8 5 1 172  | 1 | 735.8932 | 1469.772 | 2 | 20.67 | 0.027    | SAPFKVSPLLFGR  | Phospho (ST) | 0.0000001000000.0 | JC_Synth_SCX_9.2919.2919.2.dta |
| GPSGXVSAQXLXR 2 1 1 1 424  | 1 | 691.7971 | 1381.58  | 2 | 42.99 | 0.00014  | GPSGEVSDAQLDK  | Phospho (ST) | 0.0000001000000.0 | JC_Synth_SCX_9.1961.1961.2.dta |
| SXPFKXSPLXFGR 0 5 9 0 119  | 1 | 521.5984 | 1561.773 | 3 | 37.09 | 0.00053  | SAPFKLSPLYFGR  | Phospho (ST) | 0.0000001000000.0 | JC_Synth_SCX_9.2961.2961.3.dta |
| GPSGXVSAQXLXR 0 5 5 0 111  | 1 | 674.8546 | 1347.695 | 2 | 62.61 | 5.50E-07 | GPSGAVSLAQLLR  | Phospho (ST) | 0.0000001000000.0 | JC_Synth_SCX_9.3129.3129.2.dta |
| SXPFKXSPLXFGR 4 3 0 1 862  | 1 | 488.2438 | 1461.71  | 3 | 19.76 | 0.014    | SGPFKFSPLAFGK  | Phospho (ST) | 0.0000001000000.0 | JC_Synth_SCX_9.2781.2781.3.dta |
| SXPFKXSPLXFGR 4 5 4 1 910  | 1 | 472.2437 | 1413.709 | 3 | 49.09 | 3.10E-05 | SGPFKLSPLGFGK  | Phospho (ST) | 0.0000001000000.0 | JC_Synth_SCX_9.2848.2848.3.dta |
| GPSGXVSAQXLXR 9 5 5 1 1912 | 1 | 706.8647 | 1411.715 | 2 | 35.09 | 0.0013   | GPSGVSVQAQLLK  | Phospho (ST) | 0.0000001000000.0 | JC_Synth_SCX_9.3239.3239.2.dta |
| GPSGXVSAQXLXR 3 5 8 0 717  | 1 | 705.8625 | 1409.71  | 2 | 52.98 | 6.00E-06 | GPSGFVSLAQLVR  | Phospho (ST) | 0.0000001000000.0 | JC_Synth_SCX_9.3263.3263.2.dta |
| GPSGXVSAQXLXR 3 9 9 0 799  | 1 | 762.8497 | 1523.685 | 2 | 25.86 | 0.011    | GPSGFVSYAQLYR  | Phospho (ST) | 0.0000001000000.0 | JC_Synth_SCX_9.2884.2884.2.dta |
| GPSGXVSAQXLXR 2 6 1 1 524  | 1 | 677.7997 | 1353.585 | 2 | 72.54 | 9.20E-08 | GPSGEVSSAQLDK  | Phospho (ST) | 0.0000001000000.0 | JC_Synth_SCX_9.1951.1951.2.dta |
| GPSGXVSAQXLXR 1 5 5 0 311  | 1 | 696.8495 | 1391.685 | 2 | 46.88 | 9.20E-05 | GPSGDVSLAQLLR  | Phospho (ST) | 0.0000001000000.0 | JC_Synth_SCX_9.3048.3048.2.dta |
| SXPFKXSPLXFGR 6 1 9 1 1240 | 1 | 776.8599 | 1551.705 | 2 | 22.8  | 0.016    | SSPFKDSPLYFGR  | Phospho (ST) | 0.0000001000000.0 | JC_Synth_SCX_9.2515.2515.2.dta |
| SXPFKXSPLXFGR 4 3 5 1 872  | 1 | 752.8856 | 1503.757 | 2 | 23.65 | 0.0078   | SGPFKFSPLLFGR  | Phospho (ST) | 0.0000001000000.0 | JC_Synth_SCX_9.3138.3138.2.dta |
| SXPFKXSPLXFGR 4 5 0 1 902  | 1 | 476.9157 | 1427.725 | 3 | 49.48 | 2.70E-05 | SGPFKLSPLAFGK  | Phospho (ST) | 0.0000001000000.0 | JC_Synth_SCX_9.2849.2849.3.dta |
| GPSGXVSAQXLXR 5 5 5 0 1111 | 1 | 695.8782 | 1389.742 | 2 | 31.89 | 0.0013   | GPSGLVSLAQLLR  | Phospho (ST) | 0.0000001000000.0 | JC_Synth_SCX_9.3488.3488.2.dta |
| GPSGXVSAQXLXR 9 9 5 0 1991 | 1 | 745.8576 | 1489.701 | 2 | 50.09 | 2.90E-05 | GPSGVSVYAQLLR  | Phospho (ST) | 0.0000001000000.0 | JC_Synth_SCX_9.2914.2914.2.dta |
| SXPFKXSPLXFGR 6 9 5 1 1392 | 1 | 517.5947 | 1549.762 | 3 | 25.52 | 0.0084   | SSPFKYSPLEFGK  | Phospho (ST) | 0.0000001000000.0 | JC_Synth_SCX_9.2864.2864.3.dta |
| SXPFKXSPLXFGR 5 0 9 0 1019 | 1 | 781.8941 | 1561.774 | 2 | 31.51 | 0.0019   | SLPFKASPLYFGR  | Phospho (ST) | 0.0000001000000.0 | JC_Synth_SCX_9.2833.2833.2.dta |
| SXPFKXSPLXFGR 1 5 9 0 319  | 1 | 536.2618 | 1605.764 | 3 | 26.6  | 0.0097   | SDPFKLSPLYFGR  | Phospho (ST) | 0.0000001000000.0 | JC_Synth_SCX_9.3049.3049.3.dta |
| SXPFKXSPLXFGR 4 5 5 0 911  | 1 | 500.2668 | 1497.779 | 3 | 23.54 | 0.0066   | SGPFKLSPLFGR   | Phospho (ST) | 0.0000001000000.0 | JC_Synth_SCX_9.3141.3141.3.dta |
| SXPFKXSPLXFGR 9 0 3 0 1807 | 1 | 532.9267 | 1595.758 | 3 | 22.49 | 0.0082   | SYPFKASPLFFGR  | Phospho (ST) | 0.0000001000000.0 | JC_Synth_SCX_9.2921.2921.3.dta |
| SXPFKXSPLXFGR 0 3 8 1 78   | 1 | 502.2596 | 1503.757 | 3 | 28.67 | 0.0024   | SAPFKFSPLYFGR  | Phospho (ST) | 0.0000001000000.0 | JC_Synth_SCX_9.3007.3007.3.dta |
| GPSGXVSAQXLXR 1 1 1 1 224  | 1 | 684.7896 | 1367.565 | 2 | 36    | 0.00041  | GPSGDVSDAQLDK  | Phospho (ST) | 0.0000001000000.0 | JC_Synth_SCX_9.1956.1956.2.dta |
| SXPFKXSPLXFGR 0 0 3 1 8    | 1 | 738.8702 | 1475.726 | 2 | 20.37 | 0.0092   | SAPFKASPLFFGR  | Phospho (ST) | 0.0000001000000.0 | JC_Synth_SCX_9.2762.2762.2.dta |
| GPSGXVSAQXLXR 3 8 3 0 767  | 1 | 722.8553 | 1443.696 | 2 | 26.15 | 0.01     | GPSGFVSVQAQLFR | Phospho (ST) | 0.0000001000000.0 | JC_Synth_SCX_9.3383.3383.2.dta |
| SXPFKXSPLXFGR 0 1 1 1 24   | 1 | 744.8447 | 1487.675 | 2 | 24.31 | 0.03     | SAPFKDSPLDFGK  | Phospho (ST) | 0.0000001000000.0 | JC_Synth_SCX_9.2443.2443.2.dta |
| GPSGXVSAQXLXR 5 5 5 1 1112 | 1 | 681.8755 | 1361.737 | 2 | 30.77 | 0.0019   | GPSGLVSLAQLLK  | Phospho (ST) | 0.0000001000000.0 | JC_Synth_SCX_9.3456.3456.2.dta |
| SXPFKXSPLXFGR 9 8 0 0 1961 | 1 | 774.8868 | 1547.759 | 2 | 19.73 | 0.034    | SYPFKVSPLAFGR  | Phospho (ST) | 0.0000001000000.0 | JC_Synth_SCX_9.2980.2980.2.dta |
| GPSGXVSAQXLXR 5 0 9 1 1020 | 1 | 685.8417 | 1369.669 | 2 | 40.26 | 0.00049  | GPSGLVSAQAQLYK | Phospho (ST) | 0.0000001000000.0 | JC_Synth_SCX_9.2648.2648.2.dta |
| SXPFKXSPLXFGR 0 1 8 1 38   | 1 | 736.8655 | 1471.716 | 2 | 40.89 | 0.00066  | SAPFKDSPLYFGR  | Phospho (ST) | 0.0000001000000.0 | JC_Synth_SCX_9.2730.2730.2.dta |
| GPSGXVSAQXLXR 5 9 9 1 1200 | 1 | 731.8553 | 1461.696 | 2 | 32.86 | 0.0034   | GPSGLVSYAQLYK  | Phospho (ST) | 0.0000001000000.0 | JC_Synth_SCX_9.2823.2823.2.dta |
