# Supplementary material
Source: PubMed Central journal article supplement (PMC3842852)
Supplement: ac400646m_si_005.pdf [file ac400646m_si_005.pdf]

| prot_acc                 | pep_rank | pep_exp_r | pep_exp_r | pep_exp_z | pep_score | pep_expect | pep_seq       | pep_var_mod  | pep_var_mod_pos   | pep_scan_title                 |
|--------------------------|----------|-----------|-----------|-----------|-----------|------------|---------------|--------------|-------------------|--------------------------------|
| GPSGXVSAQLXR 1 1 1 224   | 1        | 684.7896  | 1367.565  | 2         | 36        | 0.00041    | GPSGDVSDAQLDK | Phospho (ST) | 0.0000001000000.0 | JC_Synth_SCX_9.1956.1956.2.dta |
| SXPFKXSPLXFR 7 4 4 1490  | 1        | 701.8441  | 1401.674  | 2         | 26.19     | 0.015      | STPFKGSPLGFGK | Phospho (ST) | 0.0000001000000.0 | JC_Synth_SCX_7.2377.2377.2.dta |
| GPSGXVSAQLXR 2 8 6 1574  | 1        | 669.8207  | 1337.627  | 2         | 37.75     | 0.00065    | GPSGVVSAQLSK  | Phospho (ST) | 0.0000001000000.0 | JC_Synth_SCX_2.2304.2304.2.dta |
| GPSGXVSAQLXR 0 0 3 07    | 1        | 670.8235  | 1339.633  | 2         | 59.74     | 3.00E-06   | GPSGAVSAAQLFR | Phospho (ST) | 0.0000001000000.0 | JC_Synth_SCX_3.2770.2770.2.dta |
| GPSGXVSAQLXR 0 0 3 07    | 1        | 670.8235  | 1339.633  | 2         | 48.21     | 4.30E-05   | GPSGAVSAAQLFR | Phospho (ST) | 0.0000001000000.0 | JC_Synth_SCX_4.2748.2748.2.dta |
| GPSGXVSAQLXR 5 3 9 01079 | 1        | 737.8604  | 1473.706  | 2         | 31.04     | 0.0021     | GPSGLVSAQLYR  | Phospho (ST) | 0.0000001000000.0 | JC_Synth_SCX_3.4597.4597.2.dta |
| SXPFKXSPLXFR 4 2 0 1842  | 1        | 482.2354  | 1443.684  | 3         | 35.1      | 0.0021     | SGPFKESPLAFGK | Phospho (ST) | 0.0000001000000.0 | JC_Synth_SCX_5.2588.2588.3.dta |
| GPSGXVSAQLXR 8 3 1 01663 | 1        | 706.8342  | 1411.654  | 2         | 47.83     | 4.20E-05   | GPSGVVSAQLDR  | Phospho (ST) | 0.0000001000000.0 | JC_Synth_SCX_4.2754.2754.2.dta |
| SXPFKXSPLXFR 3 3 0 0661  | 1        | 790.889   | 1579.764  | 2         | 23.09     | 0.0074     | SFPFKSPLAFGR  | Phospho (ST) | 0.0000001000000.0 | JC_Synth_SCX_7.3268.3268.2.dta |
| SXPFKXSPLXFR 9 9 7 1996  | 1        | 538.9266  | 1613.758  | 3         | 25.16     | 0.0078     | SYPFKESPLTFGK | Phospho (ST) | 0.0000001000000.0 | JC_Synth_SCX_7.2550.2550.3.dta |
| GPSGXVSAQLXR 4 8 0 0961  | 1        | 639.8156  | 1277.617  | 2         | 57.55     | 2.40E-06   | GPSGGVSAQLAR  | Phospho (ST) | 0.0000001000000.0 | JC_Synth_SCX_3.2356.2356.2.dta |
| GPSGXVSAQLXR 9 4 0 11882 | 1        | 657.8101  | 1313.606  | 2         | 32.78     | 0.0033     | GPSGVVSAQLAK  | Phospho (ST) | 0.0000001000000.0 | JC_Synth_SCX_2.2194.2194.2.dta |
| SXPFKXSPLXFR 0 0 6 114   | 1        | 708.8519  | 1415.689  | 2         | 33.02     | 0.003      | SAPFKASPLFGK  | Phospho (ST) | 0.0000001000000.0 | JC_Synth_SCX_5.2489.2489.2.dta |
| SXPFKXSPLXFR 5 2 9 01059 | 1        | 810.8971  | 1619.78   | 2         | 33.32     | 0.0016     | SLPFKESPLYFGR | Phospho (ST) | 0.0000001000000.0 | JC_Synth_SCX_6.2749.2749.2.dta |
| GPSGXVSAQLXR 1 4 9 0299  | 1        | 693.8082  | 1385.602  | 2         | 59.36     | 4.30E-06   | GPSGDVSAQLYR  | Phospho (ST) | 0.0000001000000.0 | JC_Synth_SCX_2.2234.2234.2.dta |
| GPSGXVSAQLXR 0 5 5 1112  | 1        | 660.8517  | 1319.689  | 2         | 32.11     | 0.002      | GPSGAVSAAQLK  | Phospho (ST) | 0.0000001000000.0 | JC_Synth_SCX_4.3152.3152.2.dta |
| GPSGXVSAQLXR 3 3 0 1662  | 1        | 694.8362  | 1387.658  | 2         | 32.76     | 0.0035     | GPSGVVSAQLAK  | Phospho (ST) | 0.0000001000000.0 | JC_Synth_SCX_3.3070.3070.2.dta |
| GPSGXVSAQLXR 0 0 9 019   | 1        | 678.821   | 1355.627  | 2         | 41.11     | 0.00017    | GPSGAVSAAQLYR | Phospho (ST) | 0.0000001000000.0 | JC_Synth_SCX_5.2329.2329.2.dta |
| GPSGXVSAQLXR 9 1 9 01839 | 1        | 746.8292  | 1491.644  | 2         | 61.38     | 2.80E-06   | GPSGVVSAQLYR  | Phospho (ST) | 0.0000001000000.0 | JC_Synth_SCX_2.2467.2467.2.dta |
| GPSGXVSAQLXR 9 4 1 1884  | 1        | 679.8051  | 1357.596  | 2         | 29.84     | 0.0047     | GPSGVVSAQLDK  | Phospho (ST) | 0.0000001000000.0 | JC_Synth_SCX_3.5288.5288.2.dta |
| GPSGXVSAQLXR 1 3 3 0267  | 1        | 730.8343  | 1459.654  | 2         | 73.33     | 1.50E-07   | GPSGDVSAQLGR  | Phospho (ST) | 0.0000001000000.0 | JC_Synth_SCX_3.3354.3354.2.dta |
| GPSGXVSAQLXR 0 3 4 0169  | 1        | 663.8157  | 1325.617  | 2         | 69.26     | 2.00E-07   | GPSGAVSAAQLR  | Phospho (ST) | 0.0000001000000.0 | JC_Synth_SCX_3.2704.2704.2.dta |
| GPSGXVSAQLXR 4 5 8 1918  | 1        | 646.8361  | 1291.658  | 2         | 51.67     | 3.50E-05   | GPSGGVSAQLVK  | Phospho (ST) | 0.0000001000000.0 | JC_Synth_SCX_3.2859.2859.2.dta |
| GPSGXVSAQLXR 9 3 2 1866  | 1        | 731.8365  | 1461.658  | 2         | 32.08     | 0.0039     | GPSGVVSAQLK   | Phospho (ST) | 0.0000001000000.0 | JC_Synth_SCX_5.2763.2763.2.dta |
| SXPFKXSPLXFR 4 3 3 0867  | 1        | 783.8812  | 1565.748  | 2         | 35.25     | 0.0003     | SGPFKESPLFFGR | Phospho (ST) | 0.0000001000000.0 | JC_Synth_SCX_7.3243.3243.2.dta |
| GPSGXVSAQLXR 2 1 9 1440  | 1        | 715.8157  | 1429.617  | 2         | 46.25     | 8.80E-05   | GPSGVVSAQLYK  | Phospho (ST) | 0.0000001000000.0 | JC_Synth_SCX_2.2224.2224.2.dta |
| GPSGXVSAQLXR 6 8 6 11374 | 1        | 648.8153  | 1295.616  | 2         | 46.64     | 0.00012    | GPSGVVSAQLK   | Phospho (ST) | 0.0000001000000.0 | JC_Synth_SCX_5.2196.2196.2.dta |
| GPSGXVSAQLXR 3 9 7 1796  | 1        | 717.839   | 1433.663  | 2         | 41.37     | 0.0009     | GPSGVVSAQLTK  | Phospho (ST) | 0.0000001000000.0 | JC_Synth_SCX_3.2772.2772.2.dta |
| SXPFKXSPLXFR 0 9 6 1194  | 1        | 503.5792  | 1507.716  | 3         | 46.63     | 0.00016    | SAPFKYSPLFGK  | Phospho (ST) | 0.0000001000000.0 | JC_Synth_SCX_7.2655.2655.3.dta |
| GPSGXVSAQLXR 6 0 2 01205 | 1        | 669.808   | 1337.602  | 2         | 74.59     | 1.70E-07   | GPSGVVSAQLGR  | Phospho (ST) | 0.0000001000000.0 | JC_Synth_SCX_3.2090.2090.2.dta |
| GPSGXVSAQLXR 4 3 3 1868  | 1        | 687.8283  | 1373.642  | 2         | 40.4      | 0.00066    | GPSGGVSAQLFK  | Phospho (ST) | 0.0000001000000.0 | JC_Synth_SCX_3.3316.3316.2.dta |
| SXPFKXSPLXFR 7 8 9 1580  | 1        | 517.5948  | 1549.763  | 3         | 33.94     | 0.0012     | STPFKESPLFFGK | Phospho (ST) | 0.0000001000000.0 | JC_Synth_SCX_6.2766.2766.3.dta |
| SXPFKXSPLXFR 9 3 0 1987  | 1        | 563.6022  | 1687.785  | 3         | 48.14     | 1.50E-05   | SYPFKYSPLFFGR | Phospho (ST) | 0.0000001000000.0 | JC_Synth_SCX_7.3060.3060.3.dta |
| GPSGXVSAQLXR 9 9 5 01991 | 1        | 745.8577  | 1489.701  | 2         | 44.24     | 0.00011    | GPSGVVSAQLLR  | Phospho (ST) | 0.0000001000000.0 | JC_Synth_SCX_3.3010.3010.2.dta |
| SXPFKXSPLXFR 2 7 5 1552  | 1        | 510.9264  | 1529.757  | 3         | 39.81     | 0.00027    | SEPFKTSPLFFGK | Phospho (ST) | 0.0000001000000.0 | JC_Synth_SCX_5.2718.2718.3.dta |
| GPSGXVSAQLXR 9 3 9 1880  | 1        | 748.8469  | 1495.679  | 2         | 31.86     | 0.0056     | GPSGVVSAQLYK  | Phospho (ST) | 0.0000001000000.0 | JC_Synth_SCX_3.4878.4878.2.dta |
| GPSGXVSAQLXR 3 3 5 1672  | 1        | 477.5755  | 1429.705  | 3         | 25.98     | 0.0093     | GPSGVVSAQLLK  | Phospho (ST) | 0.0000001000000.0 | JC_Synth_SCX_3.3648.3648.3.dta |
| SXPFKXSPLXFR 1 9 3 0387  | 1        | 547.59    | 1639.748  | 3         | 54.22     | 8.50E-06   | SDPFKYSPLFFGR | Phospho (ST) | 0.0000001000000.0 | JC_Synth_SCX_7.3059.3059.3.dta |
| GPSGXVSAQLXR 2 1 7 0435  | 1        | 698.8109  | 1395.607  | 2         | 45.5      | 0.00016    | GPSGVVSAQLTR  | Phospho (ST) | 0.0000001000000.0 | JC_Synth_SCX_2.1977.1977.2.dta |
| GPSGXVSAQLXR 1 5 3 1308  | 1        | 699.8389  | 1397.663  | 2         | 54.17     | 2.10E-05   | GPSGDVSAQLFK  | Phospho (ST) | 0.0000001000000.0 | JC_Synth_SCX_2.3336.3336.2.dta |
| GPSGXVSAQLXR 0 1 4 029   | 1        | 647.7949  | 1293.575  | 2         | 53.64     | 6.00E-05   | GPSGAVSAAQLGR | Phospho (ST) | 0.0000001000000.0 | JC_Synth_SCX_2.2098.2098.2.dta |
| SXPFKXSPLXFR 0 3 8 178   | 1        | 502.2596  | 1503.757  | 3         | 28.67     | 0.0024     | SAPFKSPLVFGK  | Phospho (ST) | 0.0000001000000.0 | JC_Synth_SCX_9.3007.3007.3.dta |
| SXPFKXSPLXFR 5 9 3 1188  | 1        | 537.607   | 1609.799  | 3         | 66.39     | 2.40E-07   | SLPFKESPLFFGK | Phospho (ST) | 0.0000001000000.0 | JC_Synth_SCX_6.3123.3123.3.dta |
| SXPFKXSPLXFR 0 1 8 138   | 1        | 491.5791  | 1471.715  | 3         | 37.34     | 0.0015     | SAPFKDSPLVFGK | Phospho (ST) | 0.0000001000000.0 | JC_Synth_SCX_5.2530.2530.3.dta |
| GPSGXVSAQLXR 5 3 9 01079 | 1        | 737.8602  | 1473.706  | 2         | 78.45     | 3.90E-08   | GPSGLVSAQLYR  | Phospho (ST) | 0.0000001000000.0 | JC_Synth_SCX_3.3274.3274.2.dta |
| GPSGXVSAQLXR 0 0 0 1     | 1        | 632.8077  | 1263.601  | 2         | 56.63     | 2.20E-06   | GPSGAVSAAQLAR | Phospho (ST) | 0.0000001000000.0 | JC_Synth_SCX_5.2148.2148.2.dta |
| GPSGXVSAQLXR 5 9 5 01191 | 1        | 480.9144  | 1439.722  | 3         | 64.51     | 7.40E-07   | GPSGLVSAQLR   | Phospho (ST) | 0.0000001000000.0 | JC_Synth_SCX_3.3353.3353.3.dta |
| SXPFKXSPLXFR 1 2 1 244   | 1        | 516.2338  | 1545.68   | 3         | 44.71     | 0.00012    | SDPFKESPLDFGK | Phospho (ST) | 0.0000001000000.0 | JC_Synth_SCX_5.2605.2605.3.dta |
| GPSGXVSAQLXR 5 2 5 01051 | 1        | 703.8576  | 1405.701  | 2         | 48.97     | 4.90E-05   | GPSGLVSEAQLR  | Phospho (ST) | 0.0000001000000.0 | JC_Synth_SCX_3.2930.2930.2.dta |
| SXPFKXSPLXFR 0 4 4 190   | 1        | 686.8386  | 1371.663  | 2         | 27.12     | 0.0055     | SAPFKGSPLGFGK | Phospho (ST) | 0.0000001000000.0 | JC_Synth_SCX_2.2365.2365.2.dta |
| SXPFKXSPLXFR 4 9 0 1982  | 1        | 493.5756  | 1477.705  | 3         | 29.05     | 0.008      | SGPFKYSPLAFGK | Phospho (ST) | 0.0000001000000.0 | JC_Synth_SCX_6.4498.4498.3.dta |
| GPSGXVSAQLXR 1 1 9 0239  | 1        | 722.8109  | 1443.607  | 2         | 64.03     | 1.40E-06   | GPSGDVSAQLYR  | Phospho (ST) | 0.0000001000000.0 | JC_Synth_SCX_2.2256.2256.2.dta |
| GPSGXVSAQLXR 1 1 2 0225  | 1        | 705.8005  | 1409.586  | 2         | 37.03     | 0.00033    | GPSGDVSAQLER  | Phospho (ST) | 0.0000001000000.0 | JC_Synth_SCX_3.1926.1926.2.dta |
| SXPFKXSPLXFR 2 2 0 1442  | 1        | 506.2424  | 1515.705  | 3         | 44.88     | 0.00021    | SEPFKESPLAFGK | Phospho (ST) | 0.0000001000000.0 | JC_Synth_SCX_5.2452.2452.3.dta |
| SXPFKXSPLXFR 6 2 5 11252 | 1        | 506.2545  | 1515.742  | 3         | 32.52     | 0.0031     | SSPFKESPLFFGK | Phospho (ST) | 0.0000001000000.0 | JC_Synth_SCX_6.2788.2788.3.dta |
| GPSGXVSAQLXR 9 9 0 1819  | 1        | 724.8342  | 1447.654  | 2         | 61.5      | 2.80E-06   | GPSGVVSAQLYR  | Phospho (ST) | 0.0000001000000.0 | JC_Synth_SCX_4.2511.2511.2.dta |
| GPSGXVSAQLXR 0 9 0 199   | 1        | 483.5585  | 1447.654  | 3         | 24.83     | 0.013      | GPSGAVSAAQLYR | Phospho (ST) | 0.0000001000000.0 | JC_Synth_SCX_3.2535.2535.3.dta |
| GPSGXVSAQLXR 0 2 9 0159  | 1        | 707.8237  | 1413.633  | 2         | 48.21     | 8.40E-05   | GPSGVVSAQLYR  | Phospho (ST) | 0.0000001000000.0 | JC_Synth_SCX_2.2336.2336.2.dta |
| GPSGXVSAQLXR 5 1 7 01035 | 1        | 690.8315  | 1379.649  | 2         | 29.27     | 0.0066     | GPSGLVSAQLTR  | Phospho (ST) | 0.0000001000000.0 | JC_Synth_SCX_4.2435.2435.2.dta |
| SXPFKXSPLXFR 9 0 3 01807 | 1        | 532.9267  | 1595.758  | 3         | 22.49     | 0.0082     | SYPFKASPLFFGK | Phospho (ST) | 0.0000001000000.0 | JC_Synth_SCX_9.2921.2921.3.dta |
| GPSGXVSAQLXR 3 1 0 01621 | 1        | 692.8184  | 1383.622  | 2         | 45.11     | 0.0001     | GPSGVVSAQLAR  | Phospho (ST) | 0.0000001000000.0 | JC_Synth_SCX_3.2484.2484.2.dta |
| GPSGXVSAQLXR 9 3 2 1866  | 1        | 731.8364  | 1461.658  | 2         | 27.56     | 0.011      | GPSGVVSAQLK   | Phospho (ST) | 0.0000001000000.0 | JC_Synth_SCX_3.2616.2616.2.dta |
| SXPFKXSPLXFR 9 9 9 12000 | 1        | 838.894   | 1675.773  | 2         | 25.34     | 0.0039     | SYPFKESPLFFGK | Phospho (ST) | 0.0000001000000.0 | JC_Synth_SCX_7.2846.2846.2.dta |
| SXPFKXSPLXFR 1 9 0 319   | 1        | 536.2618  | 1605.764  | 3         | 26.6      | 0.0097     | SDPFKESPLFFGK | Phospho (ST) | 0.0000001000000.0 | JC_Synth_SCX_9.3049.3049.3.dta |
| GPSGXVSAQLXR 5 2 8 01057 | 1        | 464.9023  | 1391.685  | 3         | 28.65     | 0.0061     | GPSGLVSAQLYR  | Phospho (ST) | 0.0000001000000.0 | JC_Synth_SCX_3.2936.2936.3.dta |
| SXPFKXSPLXFR 0 0 8 118   | 1        | 476.9157  | 1427.725  | 3         | 52.77     | 1.30E-05   | SAPFKASPLVFGK | Phospho (ST) | 0.0000001000000.0 | JC_Synth_SCX_5.2578.2578.3.dta |
| SXPFKXSPLXFR 4 4 4 1890  | 1        | 679.8307  | 1357.647  | 2         | 25.15     | 0.014      | SGPFKGSPLGFGK | Phospho (ST) | 0.0000001000000.0 | JC_Synth_SCX_7.2392.2392.2.dta |
| SXPFKXSPLXFR 4 1 0 1822  | 1        | 477.5634  | 1429.668  | 3         | 34.82     | 0.0019     | SGPFKDSPLAFGK | Phospho (ST) | 0.0000001000000.0 | JC_Synth_SCX_6.4919.4919.3.dta |
| GPSGXVSAQLXR 5 5 3 11108 | 1        | 466.2473  | 1395.72   | 3         | 64.35     | 8.60E-07   | GPSGLVSAQLFK  | Phospho (ST) | 0.0000001000000.0 | JC_Synth_SCX_3.3764.3764.3.dta |
| SXPFKXSPLXFR 7 6 4 11530 | 1        | 478.2353  | 1431.684  | 3         | 57.41     | 9.50E-06   | STPFKSSPLGFGK | Phospho (ST) | 0.0000001000000.0 | JC_Synth_SCX_7.2373.2373.3.dta |
| GPSGXVSAQLXR 9 9 0 1999  | 1        | 770.8474  | 1539.68   | 2         | 74.81     | 9.40E-08   | GPSGVVSAQLYR  | Phospho (ST) | 0.0000001000000.0 | JC_Synth_SCX_3.2698.2698.2.dta |
| GPSGXVSAQLXR 9 4 9 01899 | 1        | 717.8263  | 1433.638  | 2         | 66.32     | 8.80E-07   | GPSGVVSAQLYR  | Phospho (ST) | 0.0000001000000.0 | JC_Synth_SCX_3.2363.2363.2.dta |
| GPSGXVSAQLXR 0 7 8 1158  |          |           |           |           |           |            |               |              |                   |                                |

|                            |   |          |          |   |       |          |                |              |                   |                                |
|----------------------------|---|----------|----------|---|-------|----------|----------------|--------------|-------------------|--------------------------------|
| GPSGXVSAQLXR 9 2 9 0 1859  | 1 | 753.8369 | 1505.659 | 2 | 72.08 | 2.30E-07 | GPSGVYSEAOQLYR | Phospho (ST) | 0.0000001000000.0 | JC_Synth_SCX_2.2522.2522.2.dta |
| GPSGXVSAQLXR 1 2 7 0 255   | 1 | 698.8107 | 1395.607 | 2 | 58.26 | 8.30E-06 | GPSGDVSEAOQLTR | Phospho (ST) | 0.0000001000000.0 | JC_Synth_SCX_2.2137.2137.2.dta |
| SXPFKXSPLXFGR 5 0 0 0 1001 | 1 | 735.8809 | 1469.747 | 2 | 40.48 | 9.40E-05 | SLPFFKASPLAFGR | Phospho (ST) | 0.0000001000000.0 | JC_Synth_SCX_6.2732.2732.2.dta |
| SXPFKXSPLXFGR 9 4 3 0 1887 | 1 | 528.2548 | 1581.743 | 3 | 39.41 | 0.00011  | SYPFKGSPLYFGR  | Phospho (ST) | 0.0000001000000.0 | JC_Synth_SCX_7.2860.2860.3.dta |
| GPSGXVSAQLXR 5 8 8 0 1177  | 1 | 681.8625 | 1361.711 | 2 | 64.74 | 3.50E-07 | GPSGLVSAQQLVR  | Phospho (ST) | 0.0000001000000.0 | JC_Synth_SCX_3.3091.3091.2.dta |
| GPSGXVSAQLXR 5 5 5 1 1112  | 1 | 681.8751 | 1361.736 | 2 | 50.97 | 1.80E-05 | GPSGLVSAQLLQ   | Phospho (ST) | 0.0000001000000.0 | JC_Synth_SCX_3.3642.3642.2.dta |
| SXPFKXSPLXFGR 6 9 5 1 1392 | 3 | 517.5947 | 1549.762 | 3 | 25.52 | 0.0084   | SSPFFKSPLLFGR  | Phospho (ST) | 0.0000001000000.0 | JC_Synth_SCX_9.2864.2864.3.dta |
| SXPFKXSPLXFGR 0 5 0 1 102  | 1 | 721.8777 | 1441.741 | 2 | 21.5  | 0.014    | SAPFKLSPLAFGK  | Phospho (ST) | 0.0000001000000.0 | JC_Synth_SCX_5.2882.2882.2.dta |
| GPSGXVSAQLXR 2 5 5 0 511   | 1 | 469.5741 | 1405.701 | 3 | 85.91 | 1.00E-08 | GPSGVSSAQLLR   | Phospho (ST) | 0.0000001000000.0 | JC_Synth_SCX_3.3235.3235.3.dta |
| SXPFKXSPLXFGR 9 3 0 0 1861 | 1 | 532.9266 | 1595.758 | 3 | 40.69 | 0.00012  | SYPFKSPLAFGR   | Phospho (ST) | 0.0000001000000.0 | JC_Synth_SCX_7.3079.3079.3.dta |
| SXPFKXSPLXFGR 6 4 9 0 1299 | 1 | 508.2426 | 1521.706 | 3 | 45.27 | 6.20E-05 | SSPFFKSPLYFGR  | Phospho (ST) | 0.0000001000000.0 | JC_Synth_SCX_7.2532.2532.3.dta |
| SXPFKXSPLXFGR 6 4 9 0 1299 | 1 | 761.8602 | 1521.706 | 2 | 29.67 | 0.0023   | SSPFFKSPLYFGR  | Phospho (ST) | 0.0000001000000.0 | JC_Synth_SCX_7.2527.2527.2.dta |
| GPSGXVSAQLXR 5 8 5 0 1171  | 1 | 688.8704 | 1375.726 | 2 | 45.4  | 5.60E-05 | GPSGLVSAQQLR   | Phospho (ST) | 0.0000001000000.0 | JC_Synth_SCX_7.3281.3281.2.dta |
| SXPFKXSPLXFGR 4 5 4 1 910  | 1 | 472.2438 | 1413.71  | 3 | 36.89 | 0.00052  | SGPFLKSPPLGFK  | Phospho (ST) | 0.0000001000000.0 | JC_Synth_SCX_8.2870.2870.3.dta |
| SXPFKXSPLXFGR 4 5 4 1 910  | 1 | 707.8621 | 1413.71  | 2 | 32.77 | 0.0013   | SGPFLKSPPLGFK  | Phospho (ST) | 0.0000001000000.0 | JC_Synth_SCX_7.3139.3139.2.dta |
| SXPFKXSPLXFGR 9 6 9 1 1940 | 1 | 534.2545 | 1599.742 | 3 | 73.83 | 1.40E-07 | SYPFKSPLYFGR   | Phospho (ST) | 0.0000001000000.0 | JC_Synth_SCX_6.2592.2592.3.dta |
| SXPFKXSPLXFGR 4 9 4 0 989  | 1 | 746.8549 | 1491.695 | 2 | 26.15 | 0.0055   | SGPFFKSPPLGFK  | Phospho (ST) | 0.0000001000000.0 | JC_Synth_SCX_7.2683.2683.2.dta |
| GPSGXVSAQLXR 0 5 0 0 101   | 1 | 653.8311 | 1305.648 | 2 | 61.83 | 6.60E-07 | GPSGAVSAAQLAR  | Phospho (ST) | 0.0000001000000.0 | JC_Synth_SCX_3.2693.2693.2.dta |
| GPSGXVSAQLXR 0 5 5 0 111   | 1 | 674.8547 | 1347.695 | 2 | 81.29 | 7.40E-09 | GPSGAVSAAQLAR  | Phospho (ST) | 0.0000001000000.0 | JC_Synth_SCX_3.3242.3242.2.dta |
| SXPFKXSPLXFGR 4 5 5 0 911  | 1 | 500.2668 | 1497.779 | 3 | 62.53 | 8.40E-07 | SGPFLKSPLLFGR  | Phospho (ST) | 0.0000001000000.0 | JC_Synth_SCX_7.3163.3163.3.dta |
| GPSGXVSAQLXR 5 9 8 0 1197  | 1 | 713.86   | 1425.706 | 2 | 54.02 | 8.30E-06 | GPSGLVSAQQLVR  | Phospho (ST) | 0.0000001000000.0 | JC_Synth_SCX_8.2932.2932.2.dta |
| SXPFKXSPLXFGR 4 4 9 1 900  | 1 | 732.8517 | 1463.689 | 2 | 27.01 | 0.015    | SGPFFKSPLYFGR  | Phospho (ST) | 0.0000001000000.0 | JC_Synth_SCX_7.2502.2502.2.dta |
| GPSGXVSAQLXR 5 5 5 0 1111  | 1 | 695.8782 | 1389.742 | 2 | 31.89 | 0.0013   | GPSGLVSAQQLR   | Phospho (ST) | 0.0000001000000.0 | JC_Synth_SCX_9.3488.3488.2.dta |
| SXPFKXSPLXFGR 4 3 5 1 872  | 1 | 752.8856 | 1503.757 | 2 | 23.65 | 0.0078   | SGPFFKSPPLFGR  | Phospho (ST) | 0.0000001000000.0 | JC_Synth_SCX_9.3138.3138.2.dta |
| GPSGXVSAQLXR 1 7 9 0 359   | 1 | 715.8211 | 1429.628 | 2 | 43.56 | 0.00027  | GPSGDVSTAQLYR  | Phospho (ST) | 0.0000001000000.0 | JC_Synth_SCX_3.1959.1959.2.dta |
| GPSGXVSAQLXR 5 1 1 0 1023  | 1 | 697.821  | 1393.628 | 2 | 33.96 | 0.005    | GPSGLVSAQQLR   | Phospho (ST) | 0.0000001000000.0 | JC_Synth_SCX_5.2386.2386.2.dta |
| SXPFKXSPLXFGR 8 3 5 1 1672 | 1 | 516.2752 | 1545.804 | 3 | 46.02 | 4.50E-05 | SYPFKSPLFGR    | Phospho (ST) | 0.0000001000000.0 | JC_Synth_SCX_6.3322.3322.3.dta |
| GPSGXVSAQLXR 2 2 9 0 459   | 1 | 736.8264 | 1471.638 | 2 | 73.76 | 1.60E-07 | GPSGEVSEAOQLR  | Phospho (ST) | 0.0000001000000.0 | JC_Synth_SCX_4.2239.2239.2.dta |
| SXPFKXSPLXFGR 9 8 3 0 1967 | 1 | 812.902  | 1623.789 | 2 | 44.76 | 4.50E-05 | SYPFKSPLFGR    | Phospho (ST) | 0.0000001000000.0 | JC_Synth_SCX_7.3139.3139.2.dta |
| GPSGXVSAQLXR 5 3 2 0 1065  | 1 | 720.8497 | 1439.685 | 2 | 38.82 | 0.00041  | GPSGLVSAQLER   | Phospho (ST) | 0.0000001000000.0 | JC_Synth_SCX_5.2996.2996.2.dta |
| SXPFKXSPLXFGR 0 0 9 0 19   | 1 | 760.8705 | 1519.726 | 2 | 24.44 | 0.0097   | SAPFKASPLYFGR  | Phospho (ST) | 0.0000001000000.0 | JC_Synth_SCX_8.2611.2611.2.dta |
| GPSGXVSAQLXR 0 0 0 0 1     | 1 | 632.8076 | 1263.601 | 2 | 62.88 | 5.20E-07 | GPSGAVSAAQLAR  | Phospho (ST) | 0.0000001000000.0 | JC_Synth_SCX_4.2135.2135.2.dta |
| GPSGXVSAQLXR 8 9 3 0 1787  | 1 | 730.8522 | 1459.69  | 2 | 74.07 | 1.10E-07 | GPSGVVSAQQLR   | Phospho (ST) | 0.0000001000000.0 | JC_Synth_SCX_3.3203.3203.2.dta |
| GPSGXVSAQLXR 2 1 2 0 425   | 1 | 712.8082 | 1423.602 | 2 | 78.76 | 7.60E-08 | GPSGVSSAQLER   | Phospho (ST) | 0.0000001000000.0 | JC_Synth_SCX_4.2017.2017.2.dta |
| GPSGXVSAQLXR 0 9 7 0 195   | 1 | 693.8261 | 1385.638 | 2 | 55.43 | 1.20E-05 | GPSGAVSAAQLR   | Phospho (ST) | 0.0000001000000.0 | JC_Synth_SCX_3.2088.2088.2.dta |
| SXPFKXSPLXFGR 1 9 9 0 399  | 1 | 828.8787 | 1655.743 | 2 | 44.8  | 8.10E-05 | SDPFFKSPLYFGR  | Phospho (ST) | 0.0000001000000.0 | JC_Synth_SCX_7.2853.2853.2.dta |
| SXPFKXSPLXFGR 3 0 8 1 618  | 1 | 752.8856 | 1503.757 | 2 | 21.61 | 0.012    | SYPFKASPLFGR   | Phospho (ST) | 0.0000001000000.0 | JC_Synth_SCX_7.3040.3040.2.dta |
| SXPFKXSPLXFGR 2 5 1 1 504  | 1 | 515.5861 | 1543.736 | 3 | 63.55 | 3.20E-06 | SEPFKLSPLDFGK  | Phospho (ST) | 0.0000001000000.0 | JC_Synth_SCX_5.2946.2946.3.dta |
| GPSGXVSAQLXR 5 3 3 1 1068  | 1 | 715.8594 | 1429.704 | 2 | 45.96 | 9.40E-05 | GPSGLVSAQQLR   | Phospho (ST) | 0.0000001000000.0 | JC_Synth_SCX_3.3746.3746.2.dta |
| GPSGXVSAQLXR 9 3 3 0 1867  | 1 | 503.5706 | 1507.69  | 3 | 44.54 | 8.40E-05 | GPSGVVSAQQLR   | Phospho (ST) | 0.0000001000000.0 | JC_Synth_SCX_3.3566.3566.3.dta |
| GPSGXVSAQLXR 9 9 9 1 2000  | 1 | 756.8441 | 1511.674 | 2 | 33.85 | 0.0026   | GPSGVVSAQQLYR  | Phospho (ST) | 0.0000001000000.0 | JC_Synth_SCX_2.2729.2729.2.dta |
| GPSGXVSAQLXR 1 3 9 0 279   | 1 | 738.8315 | 1475.648 | 2 | 57.97 | 4.50E-06 | GPSGDVSAQQLR   | Phospho (ST) | 0.0000001000000.0 | JC_Synth_SCX_3.2818.2818.2.dta |
| GPSGXVSAQLXR 2 2 2 0 445   | 1 | 719.816  | 1437.617 | 2 | 69.46 | 1.40E-06 | GPSGEVSEAOQLR  | Phospho (ST) | 0.0000001000000.0 | JC_Synth_SCX_2.2138.2138.2.dta |
| GPSGXVSAQLXR 2 2 2 0 445   | 1 | 719.816  | 1437.617 | 2 | 66.89 | 2.60E-06 | GPSGEVSEAOQLR  | Phospho (ST) | 0.0000001000000.0 | JC_Synth_SCX_5.2075.2075.2.dta |
| GPSGXVSAQLXR 5 6 0 0 1121  | 1 | 661.8286 | 1321.643 | 2 | 25.83 | 0.0072   | GPSGLVSSAQLAR  | Phospho (ST) | 0.0000001000000.0 | JC_Synth_SCX_3.6010.6010.2.dta |
| SXPFKXSPLXFGR 4 4 0 0 881  | 1 | 467.5634 | 1399.669 | 3 | 57.1  | 1.90E-05 | SGPFFKSPPLAFGR | Phospho (ST) | 0.0000001000000.0 | JC_Synth_SCX_7.2451.2451.3.dta |
| GPSGXVSAQLXR 9 2 9 1 1860  | 1 | 739.8337 | 1477.653 | 2 | 46.3  | 9.50E-05 | GPSGVYSEAOQLYR | Phospho (ST) | 0.0000001000000.0 | JC_Synth_SCX_2.2481.2481.2.dta |
| SXPFKXSPLXFGR 6 3 3 0 1267 | 1 | 798.8862 | 1595.758 | 2 | 37.05 | 0.00027  | SSPFFKSPLYFGR  | Phospho (ST) | 0.0000001000000.0 | JC_Synth_SCX_7.3245.3245.2.dta |
| GPSGXVSAQLXR 9 1 5 0 1831  | 1 | 481.5619 | 1441.664 | 3 | 45.77 | 0.00011  | GPSGVSSAQLLR   | Phospho (ST) | 0.0000001000000.0 | JC_Synth_SCX_3.2631.2631.3.dta |
| SXPFKXSPLXFGR 4 5 4 0 909  | 1 | 481.5791 | 1441.716 | 3 | 35.51 | 0.0018   | SGPFLKSPPLGFK  | Phospho (ST) | 0.0000001000000.0 | JC_Synth_SCX_8.2898.2898.3.dta |
| SXPFKXSPLXFGR 9 4 9 0 1899 | 1 | 799.8759 | 1597.737 | 2 | 35.96 | 0.00034  | SYPFKGSPLYFGR  | Phospho (ST) | 0.0000001000000.0 | JC_Synth_SCX_7.2663.2663.2.dta |
| SXPFKXSPLXFGR 9 9 9 1 2000 | 1 | 559.5983 | 1675.773 | 3 | 33.94 | 0.00073  | SYPFKSPLYFGR   | Phospho (ST) | 0.0000001000000.0 | JC_Synth_SCX_7.2845.2845.3.dta |
| SXPFKXSPLXFGR 1 5 3 1 308  | 1 | 521.5947 | 1561.762 | 3 | 73.53 | 2.80E-07 | SDPFLKSPPLFGR  | Phospho (ST) | 0.0000001000000.0 | JC_Synth_SCX_6.3355.3355.3.dta |
| GPSGXVSAQLXR 9 9 3 0 1987  | 1 | 762.8497 | 1523.685 | 2 | 27.7  | 0.0073   | GPSGVVSAQQLR   | Phospho (ST) | 0.0000001000000.0 | JC_Synth_SCX_3.4877.4877.2.dta |
| GPSGXVSAQLXR 3 9 9 0 799   | 1 | 762.8497 | 1523.685 | 2 | 25.86 | 0.011    | GPSGVVSAQQLR   | Phospho (ST) | 0.0000001000000.0 | JC_Synth_SCX_9.2884.2884.2.dta |
| SXPFKXSPLXFGR 6 8 1 1 1364 | 1 | 744.8622 | 1487.71  | 2 | 26.61 | 0.01     | SSPFFKSPPLDFGK | Phospho (ST) | 0.0000001000000.0 | JC_Synth_SCX_6.2762.2762.2.dta |
| GPSGXVSAQLXR 9 5 5 1 1912  | 1 | 471.5789 | 1411.715 | 3 | 37.5  | 0.00072  | GPSGLVSAQQLR   | Phospho (ST) | 0.0000001000000.0 | JC_Synth_SCX_3.3467.3467.3.dta |
| SXPFKXSPLXFGR 2 1 8 1 438  | 1 | 510.9142 | 1529.721 | 3 | 57.69 | 1.30E-05 | SEPFKDSPLVFGK  | Phospho (ST) | 0.0000001000000.0 | JC_Synth_SCX_5.2541.2541.3.dta |
| SXPFKXSPLXFGR 0 8 4 1 170  | 1 | 472.2437 | 1413.709 | 3 | 52.3  | 1.50E-05 | SAPFKVSPPLGFK  | Phospho (ST) | 0.0000001000000.0 | JC_Synth_SCX_5.2691.2691.3.dta |
| GPSGXVSAQLXR 5 5 8 0 1117  | 1 | 688.8702 | 1375.726 | 2 | 60.67 | 1.70E-06 | GPSGLVSAQQLVR  | Phospho (ST) | 0.0000001000000.0 | JC_Synth_SCX_5.3295.3295.2.dta |
| GPSGXVSAQLXR 5 5 8 0 1117  | 1 | 459.5826 | 1375.726 | 3 | 58.67 | 2.60E-06 | GPSGLVSAQQLR   | Phospho (ST) | 0.0000001000000.0 | JC_Synth_SCX_3.3404.3404.3.dta |
| GPSGXVSAQLXR 3 2 2 0 645   | 1 | 728.8289 | 1455.643 | 2 | 61.75 | 5.10E-06 | GPSGVVSAQQLR   | Phospho (ST) | 0.0000001000000.0 | JC_Synth_SCX_4.2504.2504.2.dta |
| SXPFKXSPLXFGR 4 8 5 1 972  | 1 | 486.2594 | 1455.756 | 3 | 50.91 | 2.90E-05 | SGPFFKSPPLFGR  | Phospho (ST) | 0.0000001000000.0 | JC_Synth_SCX_5.2955.2955.3.dta |
| GPSGXVSAQLXR 3 9 9 1 800   | 1 | 748.8466 | 1495.679 | 2 | 44    | 0.00034  | GPSGVVSAQQLYR  | Phospho (ST) | 0.0000001000000.0 | JC_Synth_SCX_3.2932.2932.2.dta |
| SXPFKXSPLXFGR 1 9 9 0 399  | 1 | 552.9215 | 1655.743 | 3 | 52.04 | 1.50E-05 | SDPFFKSPLYFGR  | Phospho (ST) | 0.0000001000000.0 | JC_Synth_SCX_7.2852.2852.3.dta |
| GPSGXVSAQLXR 8 9 3 0 1787  | 1 | 730.8522 | 1459.69  | 2 | 67.84 | 4.60E-07 | GPSGVVSAQQLR   | Phospho (ST) | 0.0000001000000.0 | JC_Synth_SCX_4.3129.3129.2.dta |
| GPSGXVSAQLXR 9 4 0 0 1881  | 1 | 671.8129 | 1341.611 | 2 | 65.58 | 5.80E-07 | GPSGVVSAQQLR   | Phospho (ST) | 0.0000001000000.0 | JC_Synth_SCX_3.2186.2186.2.dta |
| SXPFKXSPLXFGR 5 5 6 1 1114 | 1 | 750.8986 | 1499.783 | 2 | 25.98 | 0.0061   | SLPFLKSPPLFGR  | Phospho (ST) | 0.0000001000000.0 | JC_Synth_SCX_5.3121.3121.2.dta |
| GPSGXVSAQLXR 5 3 0 0 1061  | 1 | 691.8468 | 1381.679 | 2 | 37.97 | 0.00024  | GPSGLVSAQQLR   | Phospho (ST) | 0.0000001000000.0 | JC_Synth_SCX_4.3097.3097.2.dta |
| SXPFKXSPLXFGR 4 3 0 1 862  | 1 | 488.2438 | 1461.71  | 3 | 19.76 | 0.014    | SGPFFKSPPLAFGK | Phospho (ST) | 0.0000001000000.0 | JC_Synth_SCX_9.2781.2781.3.dta |
| GPSGXVSAQLXR 9 6 9 0 1939  | 1 | 488.89   | 1463.648 | 3 | 45.25 | 0.00014  | GPSGVSSAQLYR   | Phospho (ST) | 0.0000001000000.0 | JC_Synth_SCX_3.2384.2384.3.dta |
| GPSGXVSAQLXR 3 2 8 0 657   | 1 | 713.8417 | 1425.669 | 2 | 58.63 | 5.40E-06 | GPSGVVSEAOQLR  | Phospho (ST) | 0.0000001000000.0 | JC_Synth_SCX_2.2784.2784.2.dta |
| SXPFKXSPLXFGR 9 9 0 0 1999 | 1 | 852.8968 | 1703.779 | 2 | 23.17 | 0.0048   | SYPFKSPLYFGR   | Phospho (ST) | 0.0000001000000.0 | JC_Synth_SCX_7.2875.2875.2.dta |
| GPSGXVSAQLXR 0 6 8 0 137   | 1 | 654.8207 | 1307.627 | 2 | 77.56 | 4.70E-08 | GPSGAVSAAQLVR  | Phospho (ST) | 0.0000001000000.0 | JC_Synth_SCX_4.2161.2161.2.dta |
| GPSGXVSAQLXR 5 0 7 1 1016  | 1 | 654.8333 | 1307.652 | 2 | 41.99 | 0.00027  | GPSGLVSAQQLTK  | Phospho (ST) | 0.0000001000000.0 | JC_Synth_SCX_5.2502.2502.2.dta |
| GPSGXVSAQLXR 0 5 5 0 111   | 1 | 674.8546 | 1347.695 | 2 | 62.61 | 5.50E-07 | GPSGAVSAAQLLR  | Phospho (ST) | 0.0000001000000.0 | JC_Synth_SCX_9.3129.3129.2.dta |
| GPSGXVSAQLXR 9 5 7 0 1915  | 1 | 714.8495 | 1427.685 | 2 | 71.61 | 2.10E-07 | GPSGVVSAQQLTR  | Phospho (ST) | 0.0000001000000.0 | JC_Synth_SCX_3.2882.2882.2.dta |
| SXPFKXSPLXFGR 3 5 5 0 711  | 1 | 794.92   | 1587.825 | 2 | 39.47 | 0.00011  | SFPFLKSPLLFGR  | Phospho (ST) | 0.0000001000000.0 | JC_Synth_SCX                   |

|                           |   |          |          |   |       |          |                |              |                   |                                |
|---------------------------|---|----------|----------|---|-------|----------|----------------|--------------|-------------------|--------------------------------|
| GPSGXVSAQLXR 8 3 5 0 1671 | 1 | 470.9107 | 1409.71  | 3 | 53.14 | 5.80E-06 | GPSGVVSAQLLR   | Phospho (ST) | 0.0000001000000.0 | JC_Synth_SCX_2.3542.3542.3.dta |
| SXPFXSPLXFR 1 7 2 1 346   | 1 | 511.5739 | 1531.7   | 3 | 28.33 | 0.0057   | SDPFKTSPLFEGK  | Phospho (ST) | 0.0000001000000.0 | JC_Synth_SCX_7.2456.2456.3.dta |
| SXPFXSPLXFR 0 0 9 1 20    | 1 | 498.2473 | 1491.72  | 3 | 55.54 | 1.60E-05 | SAPFKASPLYFGK  | Phospho (ST) | 0.0000001000000.0 | JC_Synth_SCX_6.2524.2524.3.dta |
| SXPFXSPLXFR 0 5 9 1 120   | 1 | 767.8908 | 1533.767 | 2 | 30.85 | 0.003    | SAPFKLSPLYFGK  | Phospho (ST) | 0.0000001000000.0 | JC_Synth_SCX_6.2922.2922.2.dta |
| SXPFXSPLXFR 4 5 0 0 901   | 1 | 486.251  | 1455.731 | 3 | 64.82 | 1.10E-06 | SGPFKLSPLAFGR  | Phospho (ST) | 0.0000001000000.0 | JC_Synth_SCX_6.2872.2872.3.dta |
| SXPFXSPLXFR 0 0 8 0 17    | 1 | 728.8729 | 1455.731 | 2 | 29.62 | 0.0038   | SAPFKASPLVFR   | Phospho (ST) | 0.0000001000000.0 | JC_Synth_SCX_7.2599.2599.2.dta |
| SXPFXSPLXFR 5 6 9 0 1139  | 1 | 789.8914 | 1577.768 | 2 | 22.87 | 0.014    | SLPFKSPLYFR    | Phospho (ST) | 0.0000001000000.0 | JC_Synth_SCX_4.2767.2767.2.dta |
| GPSGXVSAQLXR 4 3 9 0 879  | 1 | 709.8286 | 1417.643 | 2 | 55.14 | 6.70E-06 | GPSGGVSAQLYR   | Phospho (ST) | 0.0000001000000.0 | JC_Synth_SCX_4.2800.2800.2.dta |
| SXPFXSPLXFR 5 2 0 1 1042  | 1 | 500.9227 | 1499.746 | 3 | 34.51 | 0.0016   | SLPFKESPLAFGR  | Phospho (ST) | 0.0000001000000.0 | JC_Synth_SCX_5.2761.2761.3.dta |
| GPSGXVSAQLXR 6 3 8 0 1277 | 1 | 692.8364 | 1383.658 | 2 | 32.07 | 0.0017   | GPSGVVSAQLVR   | Phospho (ST) | 0.0000001000000.0 | JC_Synth_SCX_5.2834.2834.2.dta |
| SXPFXSPLXFR 3 6 1 1 1274  | 1 | 754.8647 | 1507.715 | 2 | 29.02 | 0.0093   | SSPFKSPLSFGK   | Phospho (ST) | 0.0000001000000.0 | JC_Synth_SCX_6.2938.2938.2.dta |
| GPSGXVSAQLXR 9 0 3 0 1807 | 1 | 716.8364 | 1431.658 | 2 | 53.71 | 1.10E-05 | GPSGVVSAQLFR   | Phospho (ST) | 0.0000001000000.0 | JC_Synth_SCX_4.2922.2922.2.dta |
| GPSGXVSAQLXR 6 3 3 0 1267 | 1 | 716.8364 | 1431.658 | 2 | 53.03 | 1.30E-05 | GPSGVVSAQLFR   | Phospho (ST) | 0.0000001000000.0 | JC_Synth_SCX_4.3240.3240.2.dta |
| SXPFXSPLXFR 9 9 4 0 1989  | 1 | 533.5862 | 1597.737 | 3 | 29.12 | 0.002    | SYPFKYSPLFGR   | Phospho (ST) | 0.0000001000000.0 | JC_Synth_SCX_7.2796.2796.3.dta |
| SXPFXSPLXFR 7 2 0 1 1442  | 1 | 744.8621 | 1487.71  | 2 | 26.29 | 0.0092   | STPFKESPLAFGR  | Phospho (ST) | 0.0000001000000.0 | JC_Synth_SCX_6.2388.2388.2.dta |
| GPSGXVSAQLXR 2 5 5 0 511  | 1 | 703.8573 | 1405.7   | 2 | 56.17 | 9.40E-06 | GPSGEVSAQLLR   | Phospho (ST) | 0.0000001000000.0 | JC_Synth_SCX_5.3146.3146.2.dta |
| GPSGXVSAQLXR 5 5 9 1 1120 | 1 | 706.8646 | 1411.715 | 2 | 35.61 | 0.0011   | GPSGLVSAQLYK   | Phospho (ST) | 0.0000001000000.0 | JC_Synth_SCX_8.3120.3120.2.dta |
| GPSGXVSAQLXR 9 2 5 0 1851 | 1 | 728.847  | 1455.679 | 2 | 31.51 | 0.0022   | GPSGVVSEAQLR   | Phospho (ST) | 0.0000001000000.0 | JC_Synth_SCX_5.2659.2659.2.dta |
| GPSGXVSAQLXR 2 9 5 0 591  | 1 | 728.847  | 1455.679 | 2 | 26.49 | 0.0071   | GPSGEVSAQLR    | Phospho (ST) | 0.0000001000000.0 | JC_Synth_SCX_3.5549.5549.2.dta |
| GPSGXVSAQLXR 9 9 0 0 1999 | 1 | 770.847  | 1539.68  | 2 | 68.3  | 4.90E-07 | GPSGVVSAQLYR   | Phospho (ST) | 0.0000001000000.0 | JC_Synth_SCX_2.2761.2761.2.dta |
| SXPFXSPLXFR 9 4 3 0 1887  | 1 | 791.8782 | 1581.742 | 2 | 39.69 | 0.00011  | SYPFKGSPLFFGR  | Phospho (ST) | 0.0000001000000.0 | JC_Synth_SCX_7.2862.2862.2.dta |
| SXPFXSPLXFR 4 9 3 0 987   | 1 | 528.2546 | 1581.742 | 3 | 31.15 | 0.00077  | SGPFKYSPLFFGR  | Phospho (ST) | 0.0000001000000.0 | JC_Synth_SCX_7.2995.2995.3.dta |
| SXPFXSPLXFR 5 6 0 1 1122  | 1 | 486.9191 | 1457.736 | 3 | 33.81 | 0.0018   | SLPFKESPLAFGR  | Phospho (ST) | 0.0000001000000.0 | JC_Synth_SCX_5.2650.2650.3.dta |
| SXPFXSPLXFR 3 5 8 1 718   | 1 | 773.9089 | 1545.803 | 2 | 23.28 | 0.0085   | SFPFKLSPLVFGK  | Phospho (ST) | 0.0000001000000.0 | JC_Synth_SCX_6.3354.3354.2.dta |
| SXPFXSPLXFR 4 6 3 0 927   | 1 | 753.8625 | 1505.71  | 2 | 44.64 | 0.0001   | SGPFKSPSPLFFGR | Phospho (ST) | 0.0000001000000.0 | JC_Synth_SCX_7.2739.2739.2.dta |
| SXPFXSPLXFR 1 3 0 0 261   | 1 | 516.9143 | 1547.721 | 3 | 35.96 | 0.00091  | SDPFKSPSPLAFGR | Phospho (ST) | 0.0000001000000.0 | JC_Synth_SCX_3.3071.3071.3.dta |
| GPSGXVSAQLXR 1 7 1 0 343  | 1 | 691.8027 | 1381.591 | 2 | 50.42 | 2.60E-05 | GPSGDVSTAQLDR  | Phospho (ST) | 0.0000001000000.0 | JC_Synth_SCX_3.2045.2045.2.dta |
| GPSGXVSAQLXR 1 1 3 0 227  | 1 | 714.8131 | 1427.612 | 2 | 21.64 | 0.011    | GPSGDVSDAQLR   | Phospho (ST) | 0.0000001000000.0 | JC_Synth_SCX_2.2640.2640.2.dta |
| GPSGXVSAQLXR 9 1 8 0 1837 | 1 | 714.8313 | 1427.648 | 2 | 27.33 | 0.0093   | GPSGVVSDAQLVR  | Phospho (ST) | 0.0000001000000.0 | JC_Synth_SCX_5.2389.2389.2.dta |
| SXPFXSPLXFR 9 9 4 0 1989  | 1 | 799.8757 | 1597.737 | 2 | 32.05 | 0.001    | SYPFKYSPLFGR   | Phospho (ST) | 0.0000001000000.0 | JC_Synth_SCX_7.2795.2795.2.dta |
| SXPFXSPLXFR 6 2 1 1 1244  | 1 | 759.8492 | 1517.684 | 2 | 21.72 | 0.014    | SSPFKESPLDFGR  | Phospho (ST) | 0.0000001000000.0 | JC_Synth_SCX_7.2459.2459.2.dta |
| SXPFXSPLXFR 1 5 0 1 302   | 1 | 496.2507 | 1485.73  | 3 | 34.89 | 0.002    | SDPFKLSPLAFGR  | Phospho (ST) | 0.0000001000000.0 | JC_Synth_SCX_6.2981.2981.3.dta |
| SXPFXSPLXFR 5 6 0 0 1121  | 1 | 496.2545 | 1485.742 | 3 | 23.31 | 0.015    | SLPFKESPLAFGR  | Phospho (ST) | 0.0000001000000.0 | JC_Synth_SCX_8.2762.2762.3.dta |
| SXPFXSPLXFR 1 1 1 1 224   | 1 | 511.5617 | 1531.663 | 3 | 42.91 | 0.00016  | SDPFKDSPLDFGK  | Phospho (ST) | 0.0000001000000.0 | JC_Synth_SCX_5.2604.2604.2.dta |
| GPSGXVSAQLXR 1 1 2 0 225  | 1 | 705.8001 | 1409.586 | 2 | 20.54 | 0.015    | GPSGDVSDAQLER  | Phospho (ST) | 0.0000001000000.0 | JC_Synth_SCX_2.2086.2086.2.dta |
| SXPFXSPLXFR 5 2 5 1 1052  | 1 | 514.9383 | 1541.793 | 3 | 34.28 | 0.0011   | SLPFKESPLFFGR  | Phospho (ST) | 0.0000001000000.0 | JC_Synth_SCX_5.3132.3132.3.dta |
| GPSGXVSAQLXR 9 2 0 0 1841 | 1 | 472.218  | 1413.632 | 3 | 70.12 | 5.40E-07 | GPSGVVSEAQLAR  | Phospho (ST) | 0.0000001000000.0 | JC_Synth_SCX_3.2872.2872.3.dta |
| GPSGXVSAQLXR 9 4 2 1 1886 | 1 | 686.8124 | 1371.61  | 2 | 38.06 | 0.0011   | GPSGVVSGAQLER  | Phospho (ST) | 0.0000001000000.0 | JC_Synth_SCX_2.2193.2193.2.dta |
| GPSGXVSAQLXR 3 3 5 0 671  | 1 | 729.8624 | 1457.71  | 2 | 29.82 | 0.0027   | GPSGVVSAQLLR   | Phospho (ST) | 0.0000001000000.0 | JC_Synth_SCX_5.3535.3535.2.dta |
| SXPFXSPLXFR 2 8 1 1 458   | 1 | 515.5859 | 1543.736 | 3 | 42.09 | 0.00047  | SEPFKESPLVFGK  | Phospho (ST) | 0.0000001000000.0 | JC_Synth_SCX_5.2533.2533.3.dta |
| SXPFXSPLXFR 9 9 9 1 2000  | 1 | 559.5981 | 1675.773 | 3 | 21.5  | 0.013    | SYPFKYSPLYFGK  | Phospho (ST) | 0.0000001000000.0 | JC_Synth_SCX_9.2826.2826.3.dta |
| SXPFXSPLXFR 1 7 9 0 359   | 1 | 532.2495 | 1593.727 | 3 | 33.7  | 0.0024   | SDPFKTSPLYFR   | Phospho (ST) | 0.0000001000000.0 | JC_Synth_SCX_7.2568.2568.3.dta |
| SXPFXSPLXFR 9 9 2 1 1986  | 1 | 548.2579 | 1641.752 | 3 | 48.5  | 1.70E-05 | SYPFKTSPLFEGK  | Phospho (ST) | 0.0000001000000.0 | JC_Synth_SCX_6.2767.2767.3.dta |
| GPSGXVSAQLXR 0 0 3 0 7    | 1 | 670.8231 | 1339.632 | 2 | 31.42 | 0.0023   | GPSGAVSAAQLFR  | Phospho (ST) | 0.0000001000000.0 | JC_Synth_SCX_5.2739.2739.2.dta |
| SXPFXSPLXFR 0 1 5 0 31    | 1 | 757.8755 | 1513.737 | 2 | 34.05 | 0.0024   | SAPFKDSPLLFR   | Phospho (ST) | 0.0000001000000.0 | JC_Synth_SCX_7.2676.2676.2.dta |
| GPSGXVSAQLXR 9 4 0 0 1881 | 1 | 671.8127 | 1341.611 | 2 | 45.52 | 5.90E-05 | GPSGVVSGAQLAR  | Phospho (ST) | 0.0000001000000.0 | JC_Synth_SCX_5.2177.2177.2.dta |
| SXPFXSPLXFR 2 2 2 0 445   | 1 | 534.9127 | 1601.716 | 3 | 46.39 | 9.60E-05 | SEPFKESPLFGR   | Phospho (ST) | 0.0000001000000.0 | JC_Synth_SCX_6.2486.2486.3.dta |
| SXPFXSPLXFR 1 1 1 1 524   | 1 | 506.9019 | 1517.684 | 3 | 48.07 | 3.30E-05 | SEPFKESPLDFGK  | Phospho (ST) | 0.0000001000000.0 | JC_Synth_SCX_5.2474.2474.3.dta |
| SXPFXSPLXFR 5 0 9 0 1019  | 1 | 521.5983 | 1561.773 | 3 | 46.12 | 6.60E-05 | SLPFKASPLYFR   | Phospho (ST) | 0.0000001000000.0 | JC_Synth_SCX_6.2819.2819.3.dta |
| GPSGXVSAQLXR 5 5 8 1 1118 | 1 | 450.2471 | 1347.719 | 3 | 61.47 | 2.10E-06 | GPSGLVSAQLYK   | Phospho (ST) | 0.0000001000000.0 | JC_Synth_SCX_3.3373.3373.3.dta |
| GPSGXVSAQLXR 0 2 4 0 49   | 1 | 654.8023 | 1307.59  | 2 | 59.44 | 6.30E-06 | GPSGVVSEAQLGR  | Phospho (ST) | 0.0000001000000.0 | JC_Synth_SCX_5.2065.2065.2.dta |
| GPSGXVSAQLXR 2 2 6 0 453  | 1 | 698.8104 | 1395.606 | 2 | 57.96 | 8.90E-06 | GPSGEVSEAQLSR  | Phospho (ST) | 0.0000001000000.0 | JC_Synth_SCX_4.1908.1908.2.dta |
| GPSGXVSAQLXR 2 1 7 0 435  | 1 | 698.8104 | 1395.606 | 2 | 50.23 | 5.30E-05 | GPSGEVSDAQLTR  | Phospho (ST) | 0.0000001000000.0 | JC_Synth_SCX_3.2051.2051.2.dta |
| SXPFXSPLXFR 5 6 5 0 1131  | 1 | 764.9015 | 1527.789 | 2 | 26.12 | 0.0038   | SLPFKSPSPLFFGR | Phospho (ST) | 0.0000001000000.0 | JC_Synth_SCX_8.2876.2876.2.dta |
| SXPFXSPLXFR 6 0 4 1 1210  | 1 | 468.2315 | 1401.673 | 3 | 29.36 | 0.0074   | SSPFKASPLGFGK  | Phospho (ST) | 0.0000001000000.0 | JC_Synth_SCX_6.2147.2147.3.dta |
| GPSGXVSAQLXR 8 5 8 0 1717 | 1 | 681.8622 | 1361.71  | 2 | 53    | 5.30E-06 | GPSGVVSAQLVR   | Phospho (ST) | 0.0000001000000.0 | JC_Synth_SCX_3.3264.3264.2.dta |
| SXPFXSPLXFR 9 4 3 0 1887  | 1 | 528.2545 | 1581.742 | 3 | 20.61 | 0.0087   | SYPFKGSPLFFGR  | Phospho (ST) | 0.0000001000000.0 | JC_Synth_SCX_8.2867.2867.3.dta |
| SXPFXSPLXFR 9 9 6 0 1993  | 1 | 814.8809 | 1627.747 | 2 | 31.59 | 0.0021   | SYPFKYSPLSFR   | Phospho (ST) | 0.0000001000000.0 | JC_Synth_SCX_7.2813.2813.2.dta |
| GPSGXVSAQLXR 1 2 0 0 241  | 1 | 683.8051 | 1365.596 | 2 | 30.65 | 0.0055   | GPSGDVSEAQLAR  | Phospho (ST) | 0.0000001000000.0 | JC_Synth_SCX_2.2129.2129.2.dta |
| GPSGXVSAQLXR 9 5 5 1 1912 | 1 | 706.8645 | 1411.715 | 2 | 44.89 | 0.00013  | GPSGVVSAQLLK   | Phospho (ST) | 0.0000001000000.0 | JC_Synth_SCX_2.3464.3464.2.dta |
| GPSGXVSAQLXR 4 3 5 0 871  | 1 | 684.8387 | 1367.663 | 2 | 68.54 | 5.90E-07 | GPSGGVSAQLLR   | Phospho (ST) | 0.0000001000000.0 | JC_Synth_SCX_3.3218.3218.2.dta |
| SXPFXSPLXFR 2 6 1 0 523   | 1 | 773.8522 | 1545.69  | 2 | 27.38 | 0.013    | SEPFKESPLDFGR  | Phospho (ST) | 0.0000001000000.0 | JC_Synth_SCX_7.2486.2486.2.dta |
| GPSGXVSAQLXR 2 1 9 0 439  | 1 | 729.8183 | 1457.622 | 2 | 55.45 | 7.30E-06 | GPSGEVSDAQLYR  | Phospho (ST) | 0.0000001000000.0 | JC_Synth_SCX_5.2197.2197.2.dta |
| SXPFXSPLXFR 4 1 8 1 838   | 1 | 486.9069 | 1457.699 | 3 | 27.13 | 0.0085   | SGPFKDSPLVFGK  | Phospho (ST) | 0.0000001000000.0 | JC_Synth_SCX_5.2787.2787.3.dta |
| GPSGXVSAQLXR 0 7 6 1 154  | 1 | 641.807  | 1281.6   | 2 | 28.53 | 0.0057   | GPSGAVSTAQLSK  | Phospho (ST) | 0.0000001000000.0 | JC_Synth_SCX_5.2005.2005.2.dta |
| SXPFXSPLXFR 4 1 7 1 836   | 1 | 487.5667 | 1459.678 | 3 | 32.1  | 0.0037   | SGPFKDSPLTFGK  | Phospho (ST) | 0.0000001000000.0 | JC_Synth_SCX_6.5059.5059.3.dta |
| SXPFXSPLXFR 4 1 7 1 836   | 1 | 487.5667 | 1459.678 | 3 | 29.83 | 0.0062   | SGPFKDSPLTFGK  | Phospho (ST) | 0.0000001000000.0 | JC_Synth_SCX_6.4594.4594.3.dta |
| SXPFXSPLXFR 5 3 3 1 1068  | 1 | 532.275  | 1593.803 | 3 | 38.88 | 0.00013  | SLPFKSPSPLFFGR | Phospho (ST) | 0.0000001000000.0 | JC_Synth_SCX_6.3475.3475.3.dta |
| SXPFXSPLXFR 3 5 3 1 708   | 1 | 532.275  | 1593.803 | 3 | 21.35 | 0.0073   | SFPFKLSPLFFGK  | Phospho (ST) | 0.0000001000000.0 | JC_Synth_SCX_6.3622.3622.3.dta |
| SXPFXSPLXFR 6 5 9 1 1320  | 1 | 517.5945 | 1549.762 | 3 | 66.73 | 7.30E-07 | SSPFKLSPLYFR   | Phospho (ST) | 0.0000001000000.0 | JC_Synth_SCX_6.2931.2931.3.dta |
| GPSGXVSAQLXR 9 2 9 0 1859 | 1 | 753.8365 | 1505.659 | 2 | 24.76 | 0.012    | GPSGVVSEAQLYR  | Phospho (ST) | 0.0000001000000.0 | JC_Synth_SCX_3.4967.4967.2.dta |
| SXPFXSPLXFR 0 4 3 1 88    | 1 | 488.2436 | 1461.709 | 3 | 56.22 | 3.20E-06 | SAPFKGSPLAFGR  | Phospho (ST) | 0.0000001000000.0 | JC_Synth_SCX_6.2647.2647.3.dta |
| GPSGXVSAQLXR 5 8 5 0 1171 | 1 | 688.8701 | 1375.726 | 2 | 28.11 | 0.003    | GPSGLVSAQLLR   | Phospho (ST) | 0.0000001000000.0 | JC_Synth_SCX_8.3272.3272.2.dta |
| GPSGXVSAQLXR 0 5 6 1 114  | 1 | 647.8252 | 1293.636 | 2 | 44.6  | 0.00017  | GPSGAVSQAQLSK  | Phospho (ST) | 0.0000001000000.0 | JC_Synth_SCX_5.2483.2483.2.dta |
| GPSGXVSAQLXR 9 3 5 0 1871 | 1 | 737.8598 | 1473.705 | 2 | 51.42 | 2.60E-05 | GPSGVVSAQLLR   | Phospho (ST) | 0.0000001000000.0 | JC_Synth_SCX_2.3488.3488.2.dta |
| SXPFXSPLXFR 0 0 9 0 19    | 1 | 507.5826 | 1519.726 | 3 | 30.21 | 0.0026   | SAPFKASPLYFR   | Phospho (ST) | 0.0000001000000.0 | JC_Synth_SCX_6.2564.2564.3.dta |
| SXPFXSPLXFR 3 0 9 1 620   | 1 | 784.8828 | 1567.751 | 2 | 25    | 0.0084   | SFPFKASPLYFGK  | Phospho (ST) | 0.0000001000000.0 | JC_Synth_SCX_6.2883.2883.2.dta |
| SXPFXSPLXFR 8 8 5 0 1771  | 1 | 763.9119 | 1525.809 | 2 | 37.25 | 0.00019  | SVPFKSPLFFGR   | Phospho (ST) | 0.0000001000000.0 | JC_Synth_SCX_6.3043.3043.2.dta |
| SXPFXSPLXFR 4 8 5 0 971   | 1 | 495.5947 | 1483.762 | 3 | 63.08 | 7.4      |                |              |                   |                                |

|                           |   |          |          |   |       |          |                |              |                   |                                |
|---------------------------|---|----------|----------|---|-------|----------|----------------|--------------|-------------------|--------------------------------|
| SXPFKXSPLXFR 9 8 9 0 1979 | 1 | 547.6018 | 1639.784 | 3 | 29.25 | 0.0012   | SYPFKVSPLYFGR  | Phospho (ST) | 0.0000001000000.0 | JC_Synth_SCX_9.2911.2911.3.dta |
| SXPFKXSPLXFR 6 1 0 1 1222 | 1 | 487.5666 | 1459.678 | 3 | 28.12 | 0.0093   | SSPFKDSPLAFGK  | Phospho (ST) | 0.0000001000000.0 | JC_Synth_SCX_6.4910.4910.3.dta |
| GPSGXVXAQLXR 9 3 8 0 1877 | 1 | 487.5704 | 1459.689 | 3 | 44.69 | 0.000114 | GPSGVYVFAQLVR  | Phospho (ST) | 0.0000001000000.0 | JC_Synth_SCX_3.3144.3144.3.dta |
| SXPFKXSPLXFR 6 6 9 0 1339 | 1 | 776.8651 | 1551.716 | 2 | 42.91 | 0.000017 | SSPFKSPLYFGR   | Phospho (ST) | 0.0000001000000.0 | JC_Synth_SCX_7.2494.2494.3.dta |
| SXPFKXSPLXFR 4 4 4 1 290  | 1 | 472.8912 | 1415.652 | 3 | 41.58 | 0.000041 | SDPFKGSPLFGFK  | Phospho (ST) | 0.0000001000000.0 | JC_Synth_SCX_6.2517.2517.3.dta |
| GPSGXVXAQLXR 3 3 8 1 678  | 1 | 708.8513 | 1415.688 | 2 | 40.5  | 0.000054 | GPSGFVSAQLVK   | Phospho (ST) | 0.0000001000000.0 | JC_Synth_SCX_3.3371.3371.2.dta |
| SXPFKXSPLXFR 6 3 5 0 1271 | 1 | 781.8937 | 1561.773 | 2 | 38.77 | 0.000036 | SSPFKSPLLFGR   | Phospho (ST) | 0.0000001000000.0 | JC_Synth_SCX_3.3188.3188.2.dta |
| GPSGXVXAQLXR 1 3 5 0 271  | 1 | 713.8415 | 1425.668 | 2 | 52.96 | 2.00E-05 | GPSGDVSAQLLR   | Phospho (ST) | 0.0000001000000.0 | JC_Synth_SCX_2.3272.3272.2.dta |
| SXPFKXSPLXFR 9 9 9 0 1999 | 1 | 568.9335 | 1703.779 | 3 | 42.86 | 5.20E-05 | SYPFKYSPLYFGR  | Phospho (ST) | 0.0000001000000.0 | JC_Synth_SCX_7.2876.2876.3.dta |
| GPSGXVXAQLXR 5 3 9 0 1079 | 1 | 737.8597 | 1473.705 | 2 | 55.27 | 1.10E-05 | GPSGLVSAQLYR   | Phospho (ST) | 0.0000001000000.0 | JC_Synth_SCX_4.3200.3200.2.dta |
| GPSGXVXAQLXR 6 5 5 1 1312 | 1 | 668.8487 | 1335.683 | 2 | 43.47 | 0.000028 | GPSGVSAQLLQK   | Phospho (ST) | 0.0000001000000.0 | JC_Synth_SCX_2.3192.3192.2.dta |
| GPSGXVXAQLXR 9 2 6 0 1853 | 1 | 477.5496 | 1429.627 | 3 | 29.76 | 0.0065   | GPSGVYVSAQLSR  | Phospho (ST) | 0.0000001000000.0 | JC_Synth_SCX_3.5135.5135.3.dta |
| SXPFKXSPLXFR 4 1 0 1 822  | 1 | 477.5631 | 1429.667 | 3 | 34.92 | 0.0018   | SGPFKDSPLAFGK  | Phospho (ST) | 0.0000001000000.0 | JC_Synth_SCX_6.4546.4546.3.dta |
| GPSGXVXAQLXR 3 9 7 1 796  | 1 | 717.8384 | 1433.662 | 2 | 32.54 | 0.0069   | GPSGFVSAQLTK   | Phospho (ST) | 0.0000001000000.0 | JC_Synth_SCX_2.2832.2832.2.dta |
| SXPFKXSPLXFR 5 9 2 0 1185 | 1 | 810.8965 | 1619.778 | 2 | 34.26 | 0.0013   | SLPFKYSPLFGR   | Phospho (ST) | 0.0000001000000.0 | JC_Synth_SCX_6.2899.2899.2.dta |
| SXPFKXSPLXFR 6 9 5 0 1391 | 1 | 789.8911 | 1577.768 | 2 | 29.64 | 0.0029   | SSPFKYSPLFGR   | Phospho (ST) | 0.0000001000000.0 | JC_Synth_SCX_7.2917.2917.2.dta |
| SXPFKXSPLXFR 6 5 0 0 1301 | 1 | 496.2544 | 1485.741 | 3 | 46.93 | 6.70E-05 | SSPFKLSPLAFGR  | Phospho (ST) | 0.0000001000000.0 | JC_Synth_SCX_7.2916.2916.3.dta |
| GPSGXVXAQLXR 0 5 8 0 111  | 1 | 674.8543 | 1347.694 | 2 | 92.12 | 6.10E-10 | GPSGAVSAQLLR   | Phospho (ST) | 0.0000001000000.0 | JC_Synth_SCX_3.2329.3229.2.dta |
| SXPFKXSPLXFR 4 5 4 0 909  | 1 | 481.5789 | 1441.715 | 3 | 50.16 | 6.20E-05 | SGPFKLSPLFGFK  | Phospho (ST) | 0.0000001000000.0 | JC_Synth_SCX_9.2875.2875.3.dta |
| SXPFKXSPLXFR 0 6 7 1 136  | 1 | 482.9068 | 1445.699 | 3 | 44.98 | 0.00016  | SAPFKSPLTFGK   | Phospho (ST) | 0.0000001000000.0 | JC_Synth_SCX_6.2163.2163.3.dta |
| SXPFKXSPLXFR 2 1 6 0 433  | 1 | 516.2372 | 1545.69  | 3 | 36.96 | 0.0014   | SEPFKDSPLFGR   | Phospho (ST) | 0.0000001000000.0 | JC_Synth_SCX_7.2494.2494.3.dta |
| SXPFKXSPLXFR 5 0 3 0 1007 | 1 | 773.8962 | 1545.778 | 2 | 31.76 | 0.00077  | SLPFKASPLFGR   | Phospho (ST) | 0.0000001000000.0 | JC_Synth_SCX_6.3028.3028.2.dta |
| GPSGXVXAQLXR 0 0 7 1 16   | 1 | 633.8094 | 1265.604 | 2 | 36.77 | 0.00028  | GPSGAVSAQLTK   | Phospho (ST) | 0.0000001000000.0 | JC_Synth_SCX_6.1931.1931.2.dta |
| GPSGXVXAQLXR 2 1 5 0 431  | 1 | 704.8286 | 1407.643 | 2 | 44.68 | 0.00042  | GPSGEVSDAQLLR  | Phospho (ST) | 0.0000001000000.0 | JC_Synth_SCX_5.2394.2394.2.dta |
| SXPFKXSPLXFR 9 0 3 0 1807 | 1 | 798.8859 | 1595.757 | 2 | 21.63 | 0.0093   | SYPFKASPLFGR   | Phospho (ST) | 0.0000001000000.0 | JC_Synth_SCX_9.2923.2923.2.dta |
| GPSGXVXAQLXR 5 8 8 0 1177 | 1 | 681.8621 | 1361.71  | 2 | 63.92 | 4.30E-07 | GPSGLVSAQLYR   | Phospho (ST) | 0.0000001000000.0 | JC_Synth_SCX_5.3027.3027.2.dta |
| GPSGXVXAQLXR 2 1 1 0 423  | 1 | 705.8    | 1409.585 | 2 | 71.54 | 1.20E-07 | GPSGEVSDAQLDR  | Phospho (ST) | 0.0000001000000.0 | JC_Synth_SCX_4.1999.1999.2.dta |
| SXPFKXSPLXFR 2 8 5 0 571  | 1 | 519.6017 | 1555.783 | 3 | 35.13 | 0.0011   | SEPFKVSPLFGR   | Phospho (ST) | 0.0000001000000.0 | JC_Synth_SCX_6.2979.2979.3.dta |
| GPSGXVXAQLXR 6 5 0 0 1301 | 1 | 661.8282 | 1321.642 | 2 | 84.55 | 9.60E-09 | GPSGVSAQLLR    | Phospho (ST) | 0.0000001000000.0 | JC_Synth_SCX_3.2578.2578.2.dta |
| SXPFKXSPLXFR 4 9 2 0 985  | 1 | 522.2458 | 1563.716 | 3 | 40.84 | 0.00048  | SGPFKYSPLFGR   | Phospho (ST) | 0.0000001000000.0 | JC_Synth_SCX_7.2709.2709.3.dta |
| GPSGXVXAQLXR 5 5 8 0 1117 | 1 | 688.8699 | 1375.725 | 2 | 59.95 | 2.00E-06 | GPSGLVSAQLYR   | Phospho (ST) | 0.0000001000000.0 | JC_Synth_SCX_9.3252.3252.2.dta |
| SXPFKXSPLXFR 6 8 8 1 1378 | 1 | 491.5909 | 1471.751 | 3 | 34.28 | 0.00093  | SSPFKVSPLFGR   | Phospho (ST) | 0.0000001000000.0 | JC_Synth_SCX_9.2800.2800.3.dta |
| GPSGXVXAQLXR 5 9 8 0 1197 | 1 | 476.2422 | 1425.705 | 3 | 57.92 | 3.40E-06 | GPSGLVSAQLYR   | Phospho (ST) | 0.0000001000000.0 | JC_Synth_SCX_2.3085.3085.3.dta |
| SXPFKXSPLXFR 0 7 0 1 142  | 1 | 477.5752 | 1429.704 | 3 | 33.63 | 0.0016   | SAPFKTSPLAFGK  | Phospho (ST) | 0.0000001000000.0 | JC_Synth_SCX_5.2486.2486.3.dta |
| GPSGXVXAQLXR 9 5 4 0 1909 | 1 | 692.8361 | 1383.658 | 2 | 24.35 | 0.0099   | GPSGVSAQLGR    | Phospho (ST) | 0.0000001000000.0 | JC_Synth_SCX_3.3477.3477.2.dta |
| GPSGXVXAQLXR 9 8 3 1 1968 | 1 | 716.8488 | 1431.683 | 2 | 45.16 | 0.00016  | GPSGVYVSAQLFK  | Phospho (ST) | 0.0000001000000.0 | JC_Synth_SCX_5.3173.3173.2.dta |
| SXPFKXSPLXFR 1 3 3 0 267  | 1 | 812.8833 | 1623.752 | 2 | 33.37 | 0.00048  | SDPFKSPPLFGR   | Phospho (ST) | 0.0000001000000.0 | JC_Synth_SCX_6.3402.3402.2.dta |
| SXPFKXSPLXFR 7 5 2 1 1506 | 1 | 765.8854 | 1529.756 | 2 | 20.72 | 0.014    | STPFKLSPLFGR   | Phospho (ST) | 0.0000001000000.0 | JC_Synth_SCX_7.2897.2897.2.dta |
| GPSGXVXAQLXR 5 8 4 1 1170 | 1 | 646.8355 | 1291.657 | 2 | 47.33 | 9.60E-05 | GPSGLVSAQLGK   | Phospho (ST) | 0.0000001000000.0 | JC_Synth_SCX_5.2675.2675.2.dta |
| GPSGXVXAQLXR 6 6 9 0 1339 | 1 | 463.546  | 1387.616 | 3 | 71.14 | 3.20E-07 | GPSGVSAQLYR    | Phospho (ST) | 0.0000001000000.0 | JC_Synth_SCX_3.1941.1941.3.dta |
| GPSGXVXAQLXR 5 9 5 0 1191 | 1 | 720.8674 | 1439.72  | 2 | 41.52 | 0.00015  | GPSGLVSAQLLR   | Phospho (ST) | 0.0000001000000.0 | JC_Synth_SCX_8.3154.3154.2.dta |
| SXPFKXSPLXFR 6 3 6 0 1273 | 1 | 512.9141 | 1535.721 | 3 | 34.09 | 0.0019   | SSPFKSPLSFGR   | Phospho (ST) | 0.0000001000000.0 | JC_Synth_SCX_7.3005.3005.3.dta |
| GPSGXVXAQLXR 8 8 3 0 1767 | 1 | 698.8543 | 1395.694 | 2 | 42.44 | 5.70E-05 | GPSGVSAQLFGR   | Phospho (ST) | 0.0000001000000.0 | JC_Synth_SCX_9.3193.3193.2.dta |
| SXPFKXSPLXFR 1 5 3 0 307  | 1 | 530.9298 | 1589.768 | 3 | 47.93 | 5.60E-05 | SDPFKLSPLFGR   | Phospho (ST) | 0.0000001000000.0 | JC_Synth_SCX_6.3388.3388.3.dta |
| SXPFKXSPLXFR 4 6 9 1 940  | 1 | 747.8566 | 1493.699 | 2 | 28.92 | 0.011    | SGPFKSPLYFGR   | Phospho (ST) | 0.0000001000000.0 | JC_Synth_SCX_6.2450.2450.2.dta |
| GPSGXVXAQLXR 8 5 6 0 1713 | 1 | 675.8439 | 1349.673 | 2 | 28.16 | 0.0046   | GPSGVSAQLSR    | Phospho (ST) | 0.0000001000000.0 | JC_Synth_SCX_5.2738.2738.2.dta |
| SXPFKXSPLXFR 2 7 8 0 557  | 1 | 772.8807 | 1543.747 | 2 | 25.69 | 0.015    | SEPFKTSPLVGR   | Phospho (ST) | 0.0000001000000.0 | JC_Synth_SCX_6.2589.2589.2.dta |
| SXPFKXSPLXFR 9 9 2 1 1986 | 1 | 821.883  | 1641.751 | 2 | 20.6  | 0.01     | SYPFKYSPLFGR   | Phospho (ST) | 0.0000001000000.0 | JC_Synth_SCX_6.2763.2763.2.dta |
| SXPFKXSPLXFR 9 9 2 1 1986 | 1 | 821.883  | 1641.751 | 2 | 19.13 | 0.015    | SYPFKYSPLFGR   | Phospho (ST) | 0.0000001000000.0 | JC_Synth_SCX_6.2763.2763.2.dta |
| GPSGXVXAQLXR 6 2 6 0 1253 | 1 | 677.8049 | 1353.595 | 2 | 60.11 | 1.90E-06 | GPSGVSEAQLSR   | Phospho (ST) | 0.0000001000000.0 | JC_Synth_SCX_4.1865.1865.2.dta |
| SXPFKXSPLXFR 0 3 0 0 61   | 1 | 752.8726 | 1503.731 | 2 | 38.57 | 0.00014  | SAPFKSPLAFGR   | Phospho (ST) | 0.0000001000000.0 | JC_Synth_SCX_6.2947.2947.2.dta |
| SXPFKXSPLXFR 4 3 0 1 862  | 1 | 731.8616 | 1461.709 | 2 | 37.93 | 0.00022  | SGPFKSPPLAFGK  | Phospho (ST) | 0.0000001000000.0 | JC_Synth_SCX_6.2934.2934.2.dta |
| SXPFKXSPLXFR 3 4 0 1 682  | 1 | 731.8616 | 1461.709 | 2 | 21.49 | 0.0096   | SFPFKGSPPLAFGK | Phospho (ST) | 0.0000001000000.0 | JC_Synth_SCX_6.2786.2786.2.dta |
| GPSGXVXAQLXR 0 1 2 0 25   | 1 | 683.8049 | 1365.595 | 2 | 40.55 | 0.00056  | GPSGEVSDAQLER  | Phospho (ST) | 0.0000001000000.0 | JC_Synth_SCX_5.2041.2041.2.dta |
| SXPFKXSPLXFR 4 5 2 0 905  | 1 | 505.586  | 1513.736 | 3 | 31.66 | 0.0042   | SGPFKLSPLFGR   | Phospho (ST) | 0.0000001000000.0 | JC_Synth_SCX_9.2888.2888.3.dta |
| SXPFKXSPLXFR 5 8 1 1 1164 | 1 | 757.8879 | 1513.761 | 2 | 29.94 | 0.0052   | SLPFKSPPLDFGK  | Phospho (ST) | 0.0000001000000.0 | JC_Synth_SCX_5.3009.3009.2.dta |
| GPSGXVXAQLXR 5 0 5 1 1012 | 1 | 660.8511 | 1319.688 | 2 | 39.09 | 0.0004   | GPSGLVSAQLLQK  | Phospho (ST) | 0.0000001000000.0 | JC_Synth_SCX_9.2935.2935.2.dta |
| SXPFKXSPLXFR 0 9 3 1 188  | 1 | 523.5909 | 1567.751 | 3 | 61.28 | 2.00E-06 | SAPFKYSPLFGR   | Phospho (ST) | 0.0000001000000.0 | JC_Synth_SCX_6.2893.2893.3.dta |
| SXPFKXSPLXFR 0 8 5 1 172  | 1 | 490.9311 | 1469.771 | 3 | 23.27 | 0.015    | SAPFKVSPLFGR   | Phospho (ST) | 0.0000001000000.0 | JC_Synth_SCX_8.2937.2937.3.dta |
| GPSGXVXAQLXR 2 1 2 0 425  | 1 | 712.8077 | 1423.601 | 2 | 59.13 | 1.10E-05 | GPSGEVSDAQLER  | Phospho (ST) | 0.0000001000000.0 | JC_Synth_SCX_2.2099.2099.2.dta |
| GPSGXVXAQLXR 5 3 8 1 1078 | 1 | 691.859  | 1381.704 | 2 | 36.28 | 0.00085  | GPSGLVSAQLYR   | Phospho (ST) | 0.0000001000000.0 | JC_Synth_SCX_9.3204.3204.2.dta |
| SXPFKXSPLXFR 0 4 3 0 87   | 1 | 745.8647 | 1489.715 | 2 | 36.41 | 0.00062  | SAPFKGSPPLFGR  | Phospho (ST) | 0.0000001000000.0 | JC_Synth_SCX_7.2724.2724.2.dta |
| SXPFKXSPLXFR 6 0 3 1 1208 | 1 | 498.247  | 1491.719 | 3 | 27.96 | 0.0091   | SSPFKASPLFGR   | Phospho (ST) | 0.0000001000000.0 | JC_Synth_SCX_6.2758.2758.3.dta |
| SXPFKXSPLXFR 5 8 1 0 1163 | 1 | 514.9297 | 1541.767 | 3 | 66.47 | 9.40E-07 | SLPFKSPPLDFGR  | Phospho (ST) | 0.0000001000000.0 | JC_Synth_SCX_6.3029.3029.3.dta |
| GPSGXVXAQLXR 3 3 8 0 677  | 1 | 722.8543 | 1443.694 | 2 | 32.49 | 0.0023   | GPSGFVSAQLYR   | Phospho (ST) | 0.0000001000000.0 | JC_Synth_SCX_3.3491.3491.2.dta |
| SXPFKXSPLXFR 2 1 5 1 432  | 1 | 515.5858 | 1543.735 | 3 | 47.24 | 6.80E-05 | SEPFKDSPLFGR   | Phospho (ST) | 0.0000001000000.0 | JC_Synth_SCX_5.2673.2673.3.dta |
| GPSGXVXAQLXR 0 5 5 0 111  | 1 | 674.8542 | 1347.694 | 2 | 61.14 | 7.70E-07 | GPSGAVSAQLLR   | Phospho (ST) | 0.0000001000000.0 | JC_Synth_SCX_5.3161.3161.2.dta |
| SXPFKXSPLXFR 4 5 5 0 911  | 1 | 749.896  | 1497.777 | 2 | 46.15 | 3.60E-05 | SGPFKLSPLFGR   | Phospho (ST) | 0.0000001000000.0 | JC_Synth_SCX_7.3153.3153.3.dta |
| SXPFKXSPLXFR 4 5 5 0 911  | 1 | 749.896  | 1497.777 | 2 | 40.26 | 0.00014  | SGPFKLSPLFGR   | Phospho (ST) | 0.0000001000000.0 | JC_Synth_SCX_6.3139.3139.2.dta |
| SXPFKXSPLXFR 9 9 6 1 1994 | 1 | 534.2542 | 1599.741 | 3 | 31.8  | 0.0026   | SYPFKYSPLFGR   | Phospho (ST) | 0.0000001000000.0 | JC_Synth_SCX_6.2757.2757.3.dta |
| GPSGXVXAQLXR 0 6 1 1 14   | 1 | 626.8015 | 1251.589 | 2 | 37.95 | 0.0007   | GPSGAVSAQLSK   | Phospho (ST) | 0.0000001000000.0 | JC_Synth_SCX_5.2034.2034.2.dta |
| GPSGXVXAQLXR 9 2 9 0 1859 | 1 | 753.8364 | 1505.658 | 2 | 24.23 | 0.014    | GPSGVYVSAQLYR  | Phospho (ST) | 0.0000001000000.0 | JC_Synth_SCX_3.4654.4654.2.dta |
| SXPFKXSPLXFR 4 0 9 0 819  | 1 | 753.8622 | 1505.71  | 2 | 29.73 | 0.0032   | SGPFKASPLYFGR  | Phospho (ST) | 0.0000001000000.0 | JC_Synth_SCX_6.2570.2570.2.dta |
| GPSGXVXAQLXR 2 5 5 0 511  | 1 | 703.857  | 1405.699 | 2 | 49.07 | 4.80E-05 | GPSGEVSAQLLR   | Phospho (ST) | 0.0000001000000.0 | JC_Synth_SCX_9.3106.3106.2.dta |
| GPSGXVXAQLXR 4 5 5 1 912  | 1 | 653.8433 | 1305.672 | 2 | 61.05 | 3.40E-06 | GPSGGVSAQLLQK  | Phospho (ST) | 0.0000001000000.0 | JC_Synth_SCX_2.3240.3240.2.dta |
| SXPFKXSPLXFR 0 5 6 1 114  | 1 | 486.9189 | 1457.735 | 3 | 27.13 | 0.0082   | SAPFKLSPLFGR   | Phospho (ST) | 0.0000001000000.0 | JC_Synth_SCX_9.2850.2850.3.dta |
| SXPFKXSPLXFR 9 9 4 1 1990 | 1 | 785.8723 | 1569.73  | 2 | 29.53 | 0.0052   | SYPFKYSPLFGR   | Phospho (ST) | 0.0000001000000.0 | JC_Synth_SCX_6.2738.2738.2.dta |
| SXPFKXSPLXFR 1 0 8 1 218  | 1 | 491.5786 | 1471.714 | 3 | 52.7  | 3.30E-05 | SDPFKASPLFGR   | Phospho (ST) | 0.0000001000000.0 | JC_Synth_SCX_5.2676.           |

|                           |   |          |            |   |       |          |               |              |                   |                                |
|---------------------------|---|----------|------------|---|-------|----------|---------------|--------------|-------------------|--------------------------------|
| SXPFKXSPLXFR 0 8 5 0 171  | 1 | 500.2664 | 1497.777   | 3 | 22.17 | 0.0091   | SAPFKVSPLLFGR | Phospho (ST) | 0.0000001000000.0 | JC_Synth_SCX_9.2955.2955.3.dta |
| GPSGXVSAQLXR 0 8 7 1 176  | 1 | 647.825  | 1293.636   | 2 | 38.67 | 0.00065  | GPSGAVSVAQLTK | Phospho (ST) | 0.0000001000000.0 | JC_Synth_SCX_6.2090.2090.2.dta |
| SXPFKXSPLXFR 4 4 0 0 881  | 1 | 700.8411 | 1399.668   | 2 | 43.3  | 0.00041  | SGPFKGSPLAFGR | Phospho (ST) | 0.0000001000000.0 | JC_Synth_SCX_6.2394.2394.4.dta |
| SXPFKXSPLXFR 0 0 0 1 2    | 1 | 467.5715 | 1399.693   | 3 | 32.29 | 0.0015   | SAPFKASPLAFGR | Phospho (ST) | 0.0000001000000.0 | JC_Synth_SCX_8.2484.2484.3.dta |
| SXPFKXSPLXFR 6 3 4 0 1269 | 1 | 753.8621 | 1505.71    | 2 | 38.05 | 0.00047  | SSPFKFSPLGFR  | Phospho (ST) | 0.0000001000000.0 | JC_Synth_SCX_7.2979.2979.2.dta |
| GPSGXVSAQLXR 2 8 7 1 576  | 1 | 676.8278 | 1351.641   | 2 | 39.85 | 0.00053  | GPSGEVSAQLTK  | Phospho (ST) | 0.0000001000000.0 | JC_Synth_SCX_6.2100.2100.2.dta |
| GPSGXVSAQLXR 5 2 9 0 1059 | 1 | 728.8466 | 1455.679   | 2 | 58.71 | 4.20E-06 | GPSGLVSEAQLYR | Phospho (ST) | 0.0000001000000.0 | JC_Synth_SCX_6.2745.2745.2.dta |
| SXPFKXSPLXFR 6 0 9 1 1220 | 1 | 503.5786 | 1507.714   | 3 | 62.83 | 4.40E-06 | SSPFKASPLYFGK | Phospho (ST) | 0.0000001000000.0 | JC_Synth_SCX_6.2542.2542.3.dta |
| SXPFKXSPLXFR 2 6 2 0 525  | 1 | 780.8598 | 1559.705   | 2 | 44.54 | 0.00025  | SEPFKSSPLEFGR | Phospho (ST) | 0.0000001000000.0 | JC_Synth_SCX_6.2424.2424.2.dta |
| GPSGXVSAQLXR 8 5 3 0 1707 | 1 | 705.8621 | 1409.71    | 2 | 21.52 | 0.0085   | GPSGVVSAQLFR  | Phospho (ST) | 0.0000001000000.0 | JC_Synth_SCX_9.3411.3411.2.dta |
| GPSGXVSAQLXR 5 5 4 1 1110 | 1 | 653.8432 | 1305.672   | 2 | 47.61 | 7.50E-05 | GPSGLVSLAQLGK | Phospho (ST) | 0.0000001000000.0 | JC_Synth_SCX_9.2890.2890.2.dta |
| GPSGXVSAQLXR 4 5 5 1 912  | 1 | 653.8432 | 1305.672   | 2 | 29.61 | 0.0048   | GPSGGVSLAQLLK | Phospho (ST) | 0.0000001000000.0 | JC_Synth_SCX_5.3099.3099.2.dta |
| GPSGXVSAQLXR 5 3 2 1 1066 | 1 | 706.8461 | 1411.678   | 2 | 41.89 | 0.00025  | GPSGLVSAQLGK  | Phospho (ST) | 0.0000001000000.0 | JC_Synth_SCX_5.2962.2962.2.dta |
| SXPFKXSPLXFR 0 8 4 1 170  | 1 | 472.2434 | 1413.709   | 3 | 59.75 | 2.70E-06 | SAPFKVSPPLGFR | Phospho (ST) | 0.0000001000000.0 | JC_Synth_SCX_6.2642.2642.3.dta |
| GPSGXVSAQLXR 5 5 6 0 1113 | 1 | 682.8516 | 1363.689   | 2 | 43.89 | 0.00016  | GPSGLVSLAQLSR | Phospho (ST) | 0.0000001000000.0 | JC_Synth_SCX_9.2904.2904.2.dta |
| SXPFKXSPLXFR 0 8 5 1 172  | 1 | 735.8928 | 1469.771   | 2 | 33.32 | 0.0015   | SAPFKVSPLLFGR | Phospho (ST) | 0.0000001000000.0 | JC_Synth_SCX_6.2898.2898.2.dta |
| SXPFKXSPLXFR 4 5 1 1 904  | 1 | 491.5786 | 1471.714   | 3 | 63.96 | 2.50E-06 | SGPFKLSPLDFGR | Phospho (ST) | 0.0000001000000.0 | JC_Synth_SCX_6.2918.2918.3.dta |
| SXPFKXSPLXFR 2 8 9 1 580  | 1 | 526.926  | 1577.756   | 3 | 30.89 | 0.0023   | SEPFKSSPLYFGK | Phospho (ST) | 0.0000001000000.0 | JC_Synth_SCX_5.2813.2813.3.dta |
| SXPFKXSPLXFR 5 5 5 1 1112 | 1 | 509.6186 | 1525.834   | 3 | 62.57 | 5.50E-07 | SPLFKLSPLDFGR | Phospho (ST) | 0.0000001000000.0 | JC_Synth_SCX_6.3419.3419.3.dta |
| GPSGXVSAQLXR 9 5 3 0 1907 | 1 | 737.8596 | 1473.705   | 2 | 73.45 | 1.60E-07 | GPSGVVSAQLFR  | Phospho (ST) | 0.0000001000000.0 | JC_Synth_SCX_4.3431.3431.2.dta |
| SXPFKXSPLXFR 5 5 6 0 1113 | 1 | 764.9012 | 1527.788   | 2 | 25.29 | 0.0046   | SPLFKLSPLDFGR | Phospho (ST) | 0.0000001000000.0 | JC_Synth_SCX_6.3140.3140.2.dta |
| SXPFKXSPLXFR 4 3 4 0 869  | 1 | 492.907  | 1475.699   | 3 | 30.94 | 0.003    | SGPFKFSPLGFR  | Phospho (ST) | 0.0000001000000.0 | JC_Synth_SCX_9.2949.2949.3.dta |
| GPSGXVSAQLXR 6 9 0 0 1381 | 1 | 686.8177 | 1371.621   | 2 | 51.46 | 3.70E-05 | GPSGVVSAQLAR  | Phospho (ST) | 0.0000001000000.0 | JC_Synth_SCX_4.2271.2271.2.dta |
| SXPFKXSPLXFR 2 6 2 1 526  | 1 | 511.5736 | 1531.699   | 3 | 23.83 | 0.0075   | SEPFKSSPLEFGR | Phospho (ST) | 0.0000001000000.0 | JC_Synth_SCX_6.2207.2207.3.dta |
| SXPFKXSPLXFR 0 0 0 0 1    | 1 | 476.9069 | 1427.699   | 3 | 82.41 | 3.70E-08 | SAPFKASPLAFGR | Phospho (ST) | 0.0000001000000.0 | JC_Synth_SCX_6.2467.2467.3.dta |
| SXPFKXSPLXFR 7 6 4 1 1530 | 1 | 478.2348 | 1431.683   | 3 | 31.35 | 0.0038   | STPFKSSPLGFR  | Phospho (ST) | 0.0000001000000.0 | JC_Synth_SCX_6.2162.2162.3.dta |
| GPSGXVSAQLXR 2 8 7 0 575  | 1 | 690.8309 | 1379.647   | 2 | 36.08 | 0.0014   | GPSGEVSAQLTR  | Phospho (ST) | 0.0000001000000.0 | JC_Synth_SCX_2.4597.4597.2.dta |
| SXPFKXSPLXFR 2 6 9 0 539  | 1 | 532.2492 | 1593.726   | 3 | 31.49 | 0.0039   | SEPFKSSPLYFGK | Phospho (ST) | 0.0000001000000.0 | JC_Synth_SCX_6.2518.2518.3.dta |
| GPSGXVSAQLXR 3 0 5 0 611  | 1 | 691.8463 | 1381.678   | 2 | 65.58 | 4.20E-07 | GPSGVVSAQLLR  | Phospho (ST) | 0.0000001000000.0 | JC_Synth_SCX_9.2999.2999.2.dta |
| GPSGXVSAQLXR 5 3 8 1 1078 | 1 | 691.8589 | 1381.703   | 2 | 38.12 | 0.00056  | GPSGLVSAQLVK  | Phospho (ST) | 0.0000001000000.0 | JC_Synth_SCX_5.3247.3247.2.dta |
| SXPFKXSPLXFR 5 8 0 0 1163 | 1 | 771.8909 | 1541.767   | 2 | 55.02 | 1.50E-05 | SPLFKVSPDFGR  | Phospho (ST) | 0.0000001000000.0 | JC_Synth_SCX_6.3034.3034.2.dta |
| SXPFKXSPLXFR 4 3 0 0 861  | 1 | 497.5788 | 1489.715   | 3 | 59.26 | 3.20E-06 | SGPFKFSPLAFGR | Phospho (ST) | 0.0000001000000.0 | JC_Synth_SCX_6.2956.2956.3.dta |
| GPSGXVSAQLXR 8 8 5 1 1772 | 1 | 445.575  | 1333.703   | 3 | 44.7  | 0.00014  | GPSGVVSAQLLK  | Phospho (ST) | 0.0000001000000.0 | JC_Synth_SCX_2.3238.3238.2.dta |
| SXPFKXSPLXFR 4 5 4 0 909  | 1 | 721.8646 | 1441.715   | 2 | 32.27 | 0.0038   | SGPFKLSPLGFR  | Phospho (ST) | 0.0000001000000.0 | JC_Synth_SCX_7.2900.2900.2.dta |
| GPSGXVSAQLXR 6 5 5 1 1312 | 1 | 668.8485 | 1335.683   | 2 | 33.38 | 0.0028   | GPSGVVSAQLLK  | Phospho (ST) | 0.0000001000000.0 | JC_Synth_SCX_5.3059.3059.2.dta |
| SXPFKXSPLXFR 4 5 5 0 911  | 1 | 500.2664 | 1497.777   | 3 | 58.92 | 1.90E-06 | SGPFKLSPLDFGR | Phospho (ST) | 0.0000001000000.0 | JC_Synth_SCX_6.3142.3142.3.dta |
| SXPFKXSPLXFR 5 9 1 0 1183 | 1 | 803.8884 | 1605.762   | 2 | 36.34 | 0.0011   | SPLFKVSPDFGR  | Phospho (ST) | 0.0000001000000.0 | JC_Synth_SCX_6.2955.2955.2.dta |
| SXPFKXSPLXFR 1 5 1 0 303  | 1 | 520.2492 | 1557.726   | 3 | 57.55 | 1.40E-05 | SDFKLSPLDFGR  | Phospho (ST) | 0.0000001000000.0 | JC_Synth_SCX_6.3069.3069.3.dta |
| GPSGXVSAQLXR 9 9 2 0 1985 | 1 | 753.8362 | 1505.658   | 2 | 28.07 | 0.0058   | GPSGVVSAQLER  | Phospho (ST) | 0.0000001000000.0 | JC_Synth_SCX_5.2482.2482.2.dta |
| SXPFKXSPLXFR 8 8 3 0 1767 | 1 | 780.9038 | 1559.793   | 2 | 43.88 | 4.10E-05 | SVPFKVSPDFGR  | Phospho (ST) | 0.0000001000000.0 | JC_Synth_SCX_6.3107.3107.2.dta |
| SXPFKXSPLXFR 9 5 0 0 1901 | 1 | 781.8934 | 1561.772   | 2 | 37.54 | 0.00048  | SVPFKSPLAFGR  | Phospho (ST) | 0.0000001000000.0 | JC_Synth_SCX_7.3013.3013.2.dta |
| GPSGXVSAQLXR 4 5 7 1 916  | 1 | 647.825  | 1293.635   | 2 | 25.48 | 0.014    | GPSGGVSAQLTK  | Phospho (ST) | 0.0000001000000.0 | JC_Synth_SCX_2.6666.2666.2.dta |
| GPSGXVSAQLXR 0 5 5 0 111  | 1 | 450.2385 | 1347.694   | 3 | 73.13 | 4.90E-08 | GPSGVVSAQLLR  | Phospho (ST) | 0.0000001000000.0 | JC_Synth_SCX_6.3340.3340.3.dta |
| SXPFKXSPLXFR 6 3 1 0 1263 | 1 | 522.2457 | 1563.715   | 3 | 37.04 | 0.0011   | SSPFKFSPLDFGR | Phospho (ST) | 0.0000001000000.0 | JC_Synth_SCX_6.3053.3053.3.dta |
| SXPFKXSPLXFR 3 3 4 0 669  | 1 | 783.8803 | 1565.746   | 2 | 36.49 | 0.00022  | SFPFKFSPLGFR  | Phospho (ST) | 0.0000001000000.0 | JC_Synth_SCX_6.3314.3314.2.dta |
| SXPFKXSPLXFR 6 0 1 1 1204 | 1 | 487.5665 | 1459.678   | 3 | 71.78 | 4.00E-07 | SSPFKASPLDFGR | Phospho (ST) | 0.0000001000000.0 | JC_Synth_SCX_6.2541.2541.3.dta |
| SXPFKXSPLXFR 2 0 2 1 406  | 1 | 506.2419 | 1515.704   | 3 | 24.79 | 0.015    | SEPFKSSPLYFGK | Phospho (ST) | 0.0000001000000.0 | JC_Synth_SCX_7.2326.2326.3.dta |
| GPSGXVSAQLXR 9 2 0 0 1841 | 1 | 707.8231 | 1413.632   | 2 | 39.85 | 0.00057  | GPSGVVSAQLAR  | Phospho (ST) | 0.0000001000000.0 | JC_Synth_SCX_5.2724.2724.2.dta |
| SXPFKXSPLXFR 7 2 9 1 1460 | 1 | 527.5857 | 1579.735   | 3 | 53.96 | 5.40E-06 | STPFKESPLYFGK | Phospho (ST) | 0.0000001000000.0 | JC_Synth_SCX_6.2485.2485.3.dta |
| GPSGXVSAQLXR 3 2 3 0 647  | 1 | 737.8413 | 1473.668   | 2 | 40.03 | 0.00042  | GPSGFVSEAQLFR | Phospho (ST) | 0.0000001000000.0 | JC_Synth_SCX_2.3187.3187.2.dta |
| SXPFKXSPLXFR 9 0 9 1 1820 | 1 | 528.9224 | 1583.745   | 3 | 59.56 | 4.80E-06 | SVPFKASPLYFGK | Phospho (ST) | 0.0000001000000.0 | JC_Synth_SCX_6.2676.2676.3.dta |
| SXPFKXSPLXFR 4 3 4 0 869  | 1 | 738.8567 | 1475.699   | 2 | 30.49 | 0.0033   | SGPFKFSPLGFR  | Phospho (ST) | 0.0000001000000.0 | JC_Synth_SCX_7.2965.2965.2.dta |
| GPSGXVSAQLXR 2 2 1 0 443  | 1 | 712.8076 | 1423.601   | 2 | 40.37 | 0.00082  | GPSGEVSAQLDR  | Phospho (ST) | 0.0000001000000.0 | JC_Synth_SCX_3.2046.2046.2.dta |
| SXPFKXSPLXFR 0 8 0 1 162  | 1 | 714.8693 | 1427.724   | 2 | 28.49 | 0.0034   | SAPFKASPLAFGR | Phospho (ST) | 0.0000001000000.0 | JC_Synth_SCX_9.2681.2681.2.dta |
| SXPFKXSPLXFR 6 5 2 0 1305 | 1 | 515.5894 | 1543.746   | 3 | 67.91 | 9.20E-07 | SSPFKLSPLEFGR | Phospho (ST) | 0.0000001000000.0 | JC_Synth_SCX_6.2901.2901.3.dta |
| SXPFKXSPLXFR 7 2 2 1 1446 | 1 | 773.8645 | 1545.715   | 2 | 26.06 | 0.0025   | STPFKESPLEFGR | Phospho (ST) | 0.0000001000000.0 | JC_Synth_SCX_5.2458.2458.2.dta |
| GPSGXVSAQLXR 9 4 4 0 1889 | 1 | 664.8046 | 1327.595   | 2 | 29.88 | 0.0042   | GPSGVVSAQLGR  | Phospho (ST) | 0.0000001000000.0 | JC_Synth_SCX_5.2164.2164.2.dta |
| GPSGXVSAQLXR 9 5 5 0 1911 | 1 | 720.8672 | 1439.72    | 2 | 64.55 | 7.40E-07 | GPSGVVSAQLLR  | Phospho (ST) | 0.0000001000000.0 | JC_Synth_SCX_9.3271.3271.2.dta |
| SXPFKXSPLXFR 4 4 5 0 891  | 1 | 481.5788 | 1441.715   | 3 | 26.99 | 0.013    | SGPFKGSPLGFR  | Phospho (ST) | 0.0000001000000.0 | JC_Synth_SCX_9.2652.2652.3.dta |
| SXPFKXSPLXFR 0 8 5 0 171  | 1 | 749.8959 | 1497.777   | 2 | 19.93 | 0.015    | SAPFKVSPLLFGR | Phospho (ST) | 0.0000001000000.0 | JC_Synth_SCX_8.2968.2968.2.dta |
| SXPFKXSPLXFR 6 8 0 1 1362 | 1 | 482.2469 | 1443.719   | 3 | 35.08 | 0.0013   | SVPFKASPLAFGR | Phospho (ST) | 0.0000001000000.0 | JC_Synth_SCX_5.2723.2723.3.dta |
| SXPFKXSPLXFR 7 5 0 0 1501 | 1 | 500.9261 | 1499.756   | 3 | 51.93 | 1.10E-05 | STPFKLSPLAFGR | Phospho (ST) | 0.0000001000000.0 | JC_Synth_SCX_6.2884.2884.3.dta |
| SXPFKXSPLXFR 9 0 9 0 1819 | 1 | 806.8831 | 1611.752   | 2 | 29.42 | 0.0027   | SVPFKASPLYFGK | Phospho (ST) | 0.0000001000000.0 | JC_Synth_SCX_7.2742.2742.2.dta |
| GPSGXVSAQLXR 0 7 4 0 149  | 1 | 640.8045 | 1279.595   | 2 | 25.92 | 0.013    | GPSGAVSAQLGR  | Phospho (ST) | 0.0000001000000.0 | JC_Synth_SCX_2.1969.1969.2.dta |
| GPSGXVSAQLXR 8 5 7 1 1716 | 1 | 668.8484 | 1335.682   | 2 | 33.19 | 0.003    | GPSGVVSAQLTK  | Phospho (ST) | 0.0000001000000.0 | JC_Synth_SCX_6.2936.2936.2.dta |
| SXPFKXSPLXFR 9 4 2 0 1885 | 1 | 782.8648 | 1563.715   | 2 | 37.44 | 0.001    | SVPFKSPLAFGR  | Phospho (ST) | 0.0000001000000.0 | JC_Synth_SCX_7.2707.2707.2.dta |
| SXPFKXSPLXFR 9 9 6 0 1993 | 1 | 814.8805 | 1627.746   | 2 | 32.41 | 0.0018   | SVPFKSPLYFGK  | Phospho (ST) | 0.0000001000000.0 | JC_Synth_SCX_6.2779.2779.2.dta |
| SXPFKXSPLXFR 3 3 3 1 668  | 1 | 543.6029 | 1627.787   | 3 | 48.81 | 2.00E-05 | SFPFKSPLFGR   | Phospho (ST) | 0.0000001000000.0 | JC_Synth_SCX_6.3571.3571.3.dta |
| SXPFKXSPLXFR 3 0 4 1 610  | 1 | 488.2434 | 1461.708   | 3 | 72.91 | 6.90E-08 | SFPFKASPLGFR  | Phospho (ST) | 0.0000001000000.0 | JC_Synth_SCX_6.2798.2798.3.dta |
| SXPFKXSPLXFR 2 2 9 0 459  | 1 | 818.8754 | 1635.736   | 2 | 52.03 | 2.00E-05 | SEPFKESPLYFGK | Phospho (ST) | 0.0000001000000.0 | JC_Synth_SCX_6.2549.2549.2.dta |
| SXPFKXSPLXFR 0 2 5 0 51   | 1 | 764.8829 | 1527.751   | 2 | 30.13 | 0.0042   | SAPFKESPLFGR  | Phospho (ST) | 0.0000001000000.0 | JC_Synth_SCX_6.2620.2620.2.dta |
| SXPFKXSPLXFR 7 5 8 0 1517 | 1 | 764.9012 | 1527.788   | 2 | 20.3  | 0.014    | STPFKLSPLDFGR | Phospho (ST) | 0.0000001000000.0 | JC_Synth_SCX_8.3025.3025.2.dta |
| SXPFKXSPLXFR 9 2 9 1 1860 | 1 | 548.2576 | 1641.751   | 3 | 50.41 | 9.10E-06 | SVPFKESPLYFGK | Phospho (ST) | 0.0000001000000.0 | JC_Synth_SCX_6.2621.2621.3.dta |
| SXPFKXSPLXFR 7 0 1 1 1404 | 1 | 737.8538 | 1473.693   | 2 | 30.01 | 0.0069   | STPFKASPLDFGR | Phospho (ST) | 0.0000001000000.0 | JC_Synth_SCX_8.2548.2548.2.dta |
| SXPFKXSPLXFR 1 3 1 0 263  | 1 | 796.8623 | 1591.71    | 2 | 38.96 | 0.00055  | SDFKFSPLDFGR  | Phospho (ST) | 0.0000001000000.0 | JC_Synth_SCX_6.3154.3154.4.dta |
| SXPFKXSPLXFR 6 9 2 0 1385 | 1 | 532.2491 | 1593.726   | 3 | 31    | 0.0044   | SSPFKSSPLEFGR | Phospho (ST) | 0.0000001000000.0 | JC_Synth_SCX_7.2710.2710.3.dta |
| GPSGXVSAQLXR 5 3 5 0 1071 | 1 | 712.8698 | 1423.725   | 2 | 69.85 | 1.00E-07 | GPSGLVSAQLLR  | Phospho (ST) | 0.0000001000000.0 | JC_Synth_SCX_5.3514.3514.2.dta |
| SXPFKXSPLXFR 9 8 3 1 1968 | 1 | 532.9345 | 1595.782   | 3 | 61.81 | 9.90E-07 | SVPFKVSPFFGK  | Phospho (ST) | 0.0000001000000.0 | JC_Synth_SCX_6.3090.3090.3.dta |
| SXPFKXSPLXFR 0 8 8 0 177  | 1 | 495.5944 | 1483.761</ |   |       |          |               |              |                   |                                |

|                            |   |          |          |   |       |          |                 |              |                   |                                |
|----------------------------|---|----------|----------|---|-------|----------|-----------------|--------------|-------------------|--------------------------------|
| SXPFXKSPXLXFR 5 0 4 0 1009 | 1 | 728.8723 | 1455.73  | 2 | 37.21 | 0.00066  | SLPFKASPLGFR    | Phospho (ST) | 0.0000001000000.0 | JC_Synth_SCX_6.2722.2722.2.dta |
| GPSGXVSAQQLXR 3 3 5 0 671  | 1 | 729.8619 | 1457.709 | 2 | 32.44 | 0.0015   | GPSGFVSAQLLR    | Phospho (ST) | 0.0000001000000.0 | JC_Synth_SCX_9.3483.3483.2.dta |
| SXPFXKSPXLXFR 6 9 4 0 1389 | 1 | 508.242  | 1521.704 | 3 | 40.12 | 0.00035  | SSPFXKSPPLGFR   | Phospho (ST) | 0.0000001000000.0 | JC_Synth_SCX_7.2692.2692.3.dta |
| GPSGXVSAQQLXR 2 1 1 0 423  | 1 | 705.7997 | 1409.585 | 2 | 53.18 | 1.60E-05 | GPSGVEVSAQLDR   | Phospho (ST) | 0.0000001000000.0 | JC_Synth_SCX_5.2014.2014.2.dta |
| SXPFXKSPXLXFR 5 7 8 0 1157 | 1 | 764.9011 | 1527.788 | 2 | 35.98 | 0.00039  | SLPFKTSPLVFR    | Phospho (ST) | 0.0000001000000.0 | JC_Synth_SCX_6.2831.2831.2.dta |
| GPSGXVSAQQLXR 4 6 8 0 937  | 1 | 647.8123 | 1293.61  | 2 | 57.49 | 1.00E-05 | GPSGVSVAQLVR    | Phospho (ST) | 0.0000001000000.0 | JC_Synth_SCX_3.1932.1932.2.dta |
| GPSGXVSAQQLXR 5 5 9 1 1120 | 1 | 706.8641 | 1411.714 | 2 | 42.73 | 0.00022  | GPSGLVSAQLVK    | Phospho (ST) | 0.0000001000000.0 | JC_Synth_SCX_2.3312.3312.2.dta |
| SXPFXKSPXLXFR 6 0 8 0 1217 | 1 | 491.5823 | 1471.725 | 3 | 32.86 | 0.0018   | SSPFXKSPPLVFR   | Phospho (ST) | 0.0000001000000.0 | JC_Synth_SCX_6.2587.2587.3.dta |
| GPSGXVSAQQLXR 9 5 3 0 1907 | 1 | 737.8594 | 1473.704 | 2 | 45.2  | 0.00011  | GPSGVVSAQLFR    | Phospho (ST) | 0.0000001000000.0 | JC_Synth_SCX_5.3410.3410.2.dta |
| GPSGXVSAQQLXR 3 5 9 0 719  | 1 | 737.8594 | 1473.704 | 2 | 39.77 | 0.00038  | GPSGFVSAQLYR    | Phospho (ST) | 0.0000001000000.0 | JC_Synth_SCX_9.3149.3149.2.dta |
| SXPFXKSPXLXFR 4 0 9 1 820  | 1 | 493.575  | 1477.703 | 3 | 57.27 | 1.20E-05 | SGPFKASPLVFR    | Phospho (ST) | 0.0000001000000.0 | JC_Synth_SCX_6.2533.2533.3.dta |
| GPSGXVSAQQLXR 5 6 5 0 1131 | 1 | 682.8514 | 1363.688 | 2 | 61.01 | 3.00E-06 | GPSGLVSAQLLR    | Phospho (ST) | 0.0000001000000.0 | JC_Synth_SCX_2.2873.2873.2.dta |
| GPSGXVSAQQLXR 0 5 8 1 118  | 1 | 653.8431 | 1305.672 | 2 | 33.76 | 0.0018   | GPSGAVSAQLVK    | Phospho (ST) | 0.0000001000000.0 | JC_Synth_SCX_8.2850.2850.2.dta |
| SXPFXKSPXLXFR 8 8 0 0 1761 | 1 | 742.8879 | 1483.761 | 2 | 24.6  | 0.0052   | SVPPFKVSPPLAFGR | Phospho (ST) | 0.0000001000000.0 | JC_Synth_SCX_6.2802.2802.2.dta |
| SXPFXKSPXLXFR 2 1 5 1 432  | 1 | 772.8748 | 1543.735 | 2 | 25.54 | 0.0063   | SEPFKDSPLVFR    | Phospho (ST) | 0.0000001000000.0 | JC_Synth_SCX_5.2474.2474.2.dta |
| GPSGXVSAQQLXR 3 5 4 0 709  | 1 | 684.8384 | 1367.662 | 2 | 40.48 | 0.00038  | GPSGFVSAQLGR    | Phospho (ST) | 0.0000001000000.0 | JC_Synth_SCX_5.2993.2993.2.dta |
| SXPFXKSPXLXFR 9 1 5 0 1831 | 1 | 803.8882 | 1605.762 | 2 | 35.82 | 0.0012   | SYPPFKDSPLVFR   | Phospho (ST) | 0.0000001000000.0 | JC_Synth_SCX_6.2812.2812.2.dta |
| SXPFXKSPXLXFR 4 0 4 1 810  | 1 | 458.2276 | 1371.661 | 3 | 28.39 | 0.0041   | SGPFKASPLGFR    | Phospho (ST) | 0.0000001000000.0 | JC_Synth_SCX_6.4879.4879.3.dta |
| SXPFXKSPXLXFR 6 9 4 1 1390 | 1 | 747.8563 | 1493.698 | 2 | 29.94 | 0.0086   | SSPFXKSPPLGFR   | Phospho (ST) | 0.0000001000000.0 | JC_Synth_SCX_6.2626.2626.2.dta |
| SXPFXKSPXLXFR 5 0 8 0 1017 | 1 | 749.8958 | 1497.777 | 2 | 44.41 | 5.40E-05 | SLPFKASPLVFR    | Phospho (ST) | 0.0000001000000.0 | JC_Synth_SCX_6.2828.2828.2.dta |
| SXPFXKSPXLXFR 1 5 1 0 303  | 1 | 779.87   | 1557.725 | 2 | 45.71 | 0.00021  | SDPFLKSPPLDFGR  | Phospho (ST) | 0.0000001000000.0 | JC_Synth_SCX_6.3068.3068.2.dta |
| GPSGXVSAQQLXR 0 5 5 1 112  | 1 | 660.8509 | 1319.687 | 2 | 52.58 | 1.80E-05 | GPSGAVSAQLVK    | Phospho (ST) | 0.0000001000000.0 | JC_Synth_SCX_9.3091.3091.2.dta |
| SXPFXKSPXLXFR 4 5 4 0 909  | 1 | 721.8644 | 1441.714 | 2 | 32.08 | 0.004    | SGPFKLSPLGFR    | Phospho (ST) | 0.0000001000000.0 | JC_Synth_SCX_9.2873.2873.2.dta |
| SXPFXKSPXLXFR 7 6 2 1 1526 | 1 | 502.2418 | 1503.704 | 3 | 62.11 | 1.20E-06 | STPFKSSPLVFR    | Phospho (ST) | 0.0000001000000.0 | JC_Synth_SCX_6.2359.2359.3.dta |
| SXPFXKSPXLXFR 3 3 4 0 669  | 1 | 522.9225 | 1565.746 | 3 | 46.31 | 2.30E-05 | SSPFXKSPPLGFR   | Phospho (ST) | 0.0000001000000.0 | JC_Synth_SCX_6.3316.3316.3.dta |
| SXPFXKSPXLXFR 0 6 9 1 140  | 1 | 754.8641 | 1507.714 | 2 | 27.75 | 0.014    | SAPFKSPLVFR     | Phospho (ST) | 0.0000001000000.0 | JC_Synth_SCX_6.2418.2418.2.dta |
| SXPFXKSPXLXFR 2 2 8 0 457  | 1 | 524.921  | 1571.741 | 3 | 68.02 | 1.20E-06 | SEPFKESPLVFR    | Phospho (ST) | 0.0000001000000.0 | JC_Synth_SCX_6.2552.2552.3.dta |
| SXPFXKSPXLXFR 2 8 7 1 576  | 1 | 506.2539 | 1515.74  | 3 | 34.95 | 0.0013   | SEPFKESPLVFR    | Phospho (ST) | 0.0000001000000.0 | JC_Synth_SCX_5.2732.2732.3.dta |
| SXPFXKSPXLXFR 7 2 9 1 1460 | 1 | 790.8748 | 1579.735 | 2 | 23.37 | 0.0062   | SSPFXKSPPLGFR   | Phospho (ST) | 0.0000001000000.0 | JC_Synth_SCX_6.2483.2483.2.dta |
| SXPFXKSPXLXFR 4 5 9 1 920  | 1 | 507.5906 | 1519.75  | 3 | 54.96 | 1.40E-05 | SGPFKLSPLVFR    | Phospho (ST) | 0.0000001000000.0 | JC_Synth_SCX_6.2925.2925.3.dta |
| SXPFXKSPXLXFR 4 7 1 1 944  | 1 | 487.5664 | 1459.677 | 3 | 42.65 | 0.00033  | SGPFKTSPLDFGR   | Phospho (ST) | 0.0000001000000.0 | JC_Synth_SCX_7.2542.2542.3.dta |
| SXPFXKSPXLXFR 0 9 9 1 200  | 1 | 792.8798 | 1583.745 | 2 | 26.19 | 0.01     | SAPFKYSPPLGFR   | Phospho (ST) | 0.0000001000000.0 | JC_Synth_SCX_8.2726.2726.2.dta |
| GPSGXVSAQQLXR 9 3 9 0 1879 | 1 | 762.849  | 1523.683 | 2 | 30.3  | 0.006    | GPSGVVSAQLYR    | Phospho (ST) | 0.0000001000000.0 | JC_Synth_SCX_3.3382.3382.2.dta |
| GPSGXVSAQQLXR 8 5 5 1 1712 | 1 | 674.8665 | 1347.719 | 2 | 38.21 | 0.00045  | GPSGVVSAQLYR    | Phospho (ST) | 0.0000001000000.0 | JC_Synth_SCX_9.3292.3292.2.dta |
| SXPFXKSPXLXFR 9 1 9 0 1839 | 1 | 828.8779 | 1655.741 | 2 | 30.36 | 0.0023   | SYPPFKDSPLVFR   | Phospho (ST) | 0.0000001000000.0 | JC_Synth_SCX_6.2701.2701.2.dta |
| SXPFXKSPXLXFR 2 2 2 0 445  | 1 | 801.8649 | 1601.715 | 2 | 39.21 | 0.00032  | SEPFKESPLVFR    | Phospho (ST) | 0.0000001000000.0 | JC_Synth_SCX_6.2484.2484.2.dta |
| SXPFXKSPXLXFR 6 6 4 1 1330 | 1 | 473.5628 | 1417.667 | 3 | 42.38 | 0.00028  | SSPFXKSPPLGFR   | Phospho (ST) | 0.0000001000000.0 | JC_Synth_SCX_6.2170.2170.3.dta |
| GPSGXVSAQQLXR 9 1 8 0 1837 | 1 | 714.8307 | 1427.647 | 2 | 33.99 | 0.002    | GPSGVVSAQLYR    | Phospho (ST) | 0.0000001000000.0 | JC_Synth_SCX_2.2453.2453.2.dta |
| GPSGXVSAQQLXR 5 0 0 0 1001 | 1 | 653.8304 | 1305.646 | 2 | 53.24 | 4.70E-06 | GPSGLVSAQQLAR   | Phospho (ST) | 0.0000001000000.0 | JC_Synth_SCX_5.2557.2557.2.dta |
| SXPFXKSPXLXFR 4 4 0 1 882  | 1 | 458.2276 | 1371.661 | 3 | 23.9  | 0.012    | SGPFKGSPLAFGR   | Phospho (ST) | 0.0000001000000.0 | JC_Synth_SCX_6.4746.4746.2.dta |
| SXPFXKSPXLXFR 0 1 8 0 37   | 1 | 750.8672 | 1499.72  | 2 | 46.34 | 0.00015  | SAPFKDSPLVFR    | Phospho (ST) | 0.0000001000000.0 | JC_Synth_SCX_6.2532.2532.2.dta |
| SXPFXKSPXLXFR 4 2 9 0 859  | 1 | 522.2455 | 1563.715 | 3 | 48.23 | 8.70E-05 | SGPFKESPLVFR    | Phospho (ST) | 0.0000001000000.0 | JC_Synth_SCX_6.2548.2548.3.dta |
| SXPFXKSPXLXFR 4 3 5 1 872  | 1 | 752.8848 | 1503.755 | 2 | 34.42 | 0.00065  | SSPFXKSPPLGFR   | Phospho (ST) | 0.0000001000000.0 | JC_Synth_SCX_6.3131.3131.2.dta |
| GPSGXVSAQQLXR 1 9 1 0 383  | 1 | 722.81   | 1443.605 | 2 | 43.73 | 0.00015  | GPSGVVSAQLDR    | Phospho (ST) | 0.0000001000000.0 | JC_Synth_SCX_5.2188.2188.2.dta |
| GPSGXVSAQQLXR 9 1 1 0 1823 | 1 | 722.81   | 1443.605 | 2 | 38.05 | 0.00054  | GPSGVVSAQLDR    | Phospho (ST) | 0.0000001000000.0 | JC_Synth_SCX_3.2226.2226.2.dta |
| GPSGXVSAQQLXR 8 4 5 0 1691 | 1 | 660.8383 | 1319.662 | 2 | 76.72 | 3.50E-08 | GPSGVVSAQLLR    | Phospho (ST) | 0.0000001000000.0 | JC_Synth_SCX_2.2657.2657.2.dta |
| GPSGXVSAQQLXR 4 5 8 0 917  | 1 | 660.8383 | 1319.662 | 2 | 69.28 | 1.90E-07 | GPSGVVSAQLYR    | Phospho (ST) | 0.0000001000000.0 | JC_Synth_SCX_2.2969.2969.2.dta |
| SXPFXKSPXLXFR 7 6 0 1 1522 | 1 | 482.9066 | 1445.698 | 3 | 39.49 | 0.00056  | STPFKSPLAFGR    | Phospho (ST) | 0.0000001000000.0 | JC_Synth_SCX_7.2391.2391.3.dta |
| SXPFXKSPXLXFR 2 2 9 0 459  | 1 | 546.2526 | 1635.736 | 3 | 47.23 | 6.00E-05 | SEPFKESPLVFR    | Phospho (ST) | 0.0000001000000.0 | JC_Synth_SCX_6.2551.2551.3.dta |
| SXPFXKSPXLXFR 1 9 3 0 387  | 1 | 820.8804 | 1639.746 | 2 | 30.56 | 0.002    | SDPFXKSPPLGFR   | Phospho (ST) | 0.0000001000000.0 | JC_Synth_SCX_7.3056.3056.2.dta |
| SXPFXKSPXLXFR 7 8 2 1 1566 | 1 | 758.8772 | 1515.74  | 2 | 25.82 | 0.011    | STPFXKSPPLGFR   | Phospho (ST) | 0.0000001000000.0 | JC_Synth_SCX_6.2633.2633.2.dta |
| GPSGXVSAQQLXR 1 2 9 0 259  | 1 | 729.8178 | 1457.621 | 2 | 29.93 | 0.0042   | GPSGVVSAQLYR    | Phospho (ST) | 0.0000001000000.0 | JC_Synth_SCX_2.5105.5105.2.dta |
| SXPFXKSPXLXFR 5 6 0 1 1122 | 1 | 486.9187 | 1457.734 | 3 | 44.94 | 0.00014  | SLPFKSPLAFGR    | Phospho (ST) | 0.0000001000000.0 | JC_Synth_SCX_6.2603.2603.3.dta |
| SXPFXKSPXLXFR 0 6 6 0 133  | 1 | 487.5701 | 1459.688 | 3 | 29.62 | 0.0044   | SAPFKSPLVFR     | Phospho (ST) | 0.0000001000000.0 | JC_Synth_SCX_7.2228.2228.3.dta |
| GPSGXVSAQQLXR 8 5 8 1 1718 | 1 | 667.8586 | 1333.703 | 2 | 37.17 | 0.00078  | GPSGVVSAQLYR    | Phospho (ST) | 0.0000001000000.0 | JC_Synth_SCX_8.3054.3054.2.dta |
| GPSGXVSAQQLXR 2 2 9 0 459  | 1 | 736.8256 | 1471.637 | 2 | 52.4  | 3.20E-05 | GPSGVEVSAQLYR   | Phospho (ST) | 0.0000001000000.0 | JC_Synth_SCX_5.2254.2254.2.dta |
| SXPFXKSPXLXFR 0 8 4 1 170  | 1 | 707.8613 | 1413.708 | 2 | 24.49 | 0.0091   | SAPFKYSPPLGFR   | Phospho (ST) | 0.0000001000000.0 | JC_Synth_SCX_7.2677.2677.2.dta |
| SXPFXKSPXLXFR 0 2 2 0 45   | 1 | 772.8621 | 1543.71  | 2 | 39.06 | 0.00096  | SAPFKESPLVFR    | Phospho (ST) | 0.0000001000000.0 | JC_Synth_SCX_6.2435.2435.2.dta |
| GPSGXVSAQQLXR 0 5 3 1 108  | 1 | 677.843  | 1353.672 | 2 | 43.95 | 0.00015  | GPSGAVSAQLFK    | Phospho (ST) | 0.0000001000000.0 | JC_Synth_SCX_5.3244.3244.2.dta |
| SXPFXKSPXLXFR 2 0 0 0 401  | 1 | 496.2419 | 1485.704 | 3 | 48.79 | 6.90E-05 | SEPFKASPLAFGR   | Phospho (ST) | 0.0000001000000.0 | JC_Synth_SCX_6.2507.2507.3.dta |
| SXPFXKSPXLXFR 1 1 5 0 231  | 1 | 520.249  | 1557.725 | 3 | 40.59 | 0.00068  | SDPFKDSPLDFGR   | Phospho (ST) | 0.0000001000000.0 | JC_Synth_SCX_6.2815.2815.3.dta |
| GPSGXVSAQQLXR 9 2 6 0 1853 | 1 | 715.8203 | 1429.626 | 2 | 43.22 | 0.00029  | GPSGVVSAQLSR    | Phospho (ST) | 0.0000001000000.0 | JC_Synth_SCX_6.2023.2023.2.dta |
| GPSGXVSAQQLXR 3 3 5 1 672  | 1 | 715.8587 | 1429.703 | 2 | 36.46 | 0.00084  | GPSGFVSAQLLK    | Phospho (ST) | 0.0000001000000.0 | JC_Synth_SCX_9.3449.3449.2.dta |
| SXPFXKSPXLXFR 9 2 3 1 1848 | 1 | 813.8851 | 1625.756 | 2 | 27.02 | 0.003    | SYPPFKESPLVFR   | Phospho (ST) | 0.0000001000000.0 | JC_Synth_SCX_6.2814.2814.2.dta |
| SXPFXKSPXLXFR 7 5 0 0 1501 | 1 | 750.8853 | 1499.756 | 2 | 31.38 | 0.0013   | STPFKLSPLAFGR   | Phospho (ST) | 0.0000001000000.0 | JC_Synth_SCX_6.2882.2882.2.dta |
| SXPFXKSPXLXFR 7 5 8 1 1518 | 1 | 750.8979 | 1499.781 | 2 | 35.83 | 0.00063  | STPFKLSPLVFR    | Phospho (ST) | 0.0000001000000.0 | JC_Synth_SCX_8.2993.2993.2.dta |
| SXPFXKSPXLXFR 6 3 3 1 1268 | 1 | 784.8823 | 1567.75  | 2 | 25.76 | 0.007    | SSPFXKSPPLGFR   | Phospho (ST) | 0.0000001000000.0 | JC_Synth_SCX_6.3228.3228.2.dta |
| SXPFXKSPXLXFR 6 1 1 1 1224 | 1 | 502.2296 | 1503.667 | 3 | 55.12 | 8.20E-06 | SSPFXKSPPLDFGR  | Phospho (ST) | 0.0000001000000.0 | JC_Synth_SCX_6.2525.2525.3.dta |
| SXPFXKSPXLXFR 2 2 8 0 457  | 1 | 786.8777 | 1571.741 | 2 | 35.72 | 0.002    | SEPFKESPLVFR    | Phospho (ST) | 0.0000001000000.0 | JC_Synth_SCX_6.2544.2544.2.dta |
| SXPFXKSPXLXFR 9 7 9 0 1959 | 1 | 548.2612 | 1641.762 | 3 | 23.72 | 0.0083   | SYPPFKTSPLVFR   | Phospho (ST) | 0.0000001000000.0 | JC_Synth_SCX_9.2755.2755.3.dta |
| SXPFXKSPXLXFR 5 9 6 0 1193 | 1 | 789.8906 | 1577.767 | 2 | 24.59 | 0.0094   | SLPFXKSPPLGFR   | Phospho (ST) | 0.0000001000000.0 | JC_Synth_SCX_9.2892.2892.2.dta |
| GPSGXVSAQQLXR 5 8 3 1 1168 | 1 | 691.8586 | 1381.703 | 2 | 47.61 | 6.20E-05 | GPSGLVSAQLFK    | Phospho (ST) | 0.0000001000000.0 | JC_Synth_SCX_5.3378.3378.2.dta |
| SXPFXKSPXLXFR 3 5 0 1 702  | 1 | 759.8926 | 1517.771 | 2 | 33.41 | 0.00062  | STPFKLSPLAFGR   | Phospho (ST) | 0.0000001000000.0 | JC_Synth_SCX_6.3195.3195.2.dta |
| GPSGXVSAQQLXR 6 5 8 1 1318 | 1 | 661.8404 | 1321.666 | 2 | 41.26 | 0.00042  | GPSGVVSAQLVK    | Phospho (ST) | 0.0000001000000.0 | JC_Synth_SCX_5.2789.2789.2.dta |
| SXPFXKSPXLXFR 5 9 9 0 1199 | 1 | 552.2733 | 1653.798 | 3 | 70.61 | 8.70E-08 | SLPFXKSPPLVFR   | Phospho (ST) | 0.0000001000000.0 | JC_Synth_SCX_6.2950.2950.3.dta |
| SXPFXKSPXLXFR 6 0 9 0 1219 | 1 | 512.9138 | 1535.72  | 3 | 54.12 | 1.90E-05 | SSPFXKSPPLGFR   | Phospho (ST) | 0.0000001000000.0 | JC_Synth_SCX_7.2612.2612.3.dta |
| SXPFXKSPXLXFR 0 8 1 1 164  | 1 | 491.5784 | 1471.714 | 3 | 53.02 | 3.10E-05 | SAPFKVSPPLDFGR  | Phospho (ST) | 0.0000001000000.0 | JC_Synth_SCX_6.2747.2747.3.dta |
| GPSGXVSAQQLXR 9 4 9 1 1900 | 1 | 703.8223 | 1405.63  | 2 | 50.2  | 7.60E-05 | GPSGVVSAQLYR    | Phospho (ST) | 0.000             |                                |

|                            |   |          |          |   |       |          |               |              |                   |                                |
|----------------------------|---|----------|----------|---|-------|----------|---------------|--------------|-------------------|--------------------------------|
| GPSGXVSAQLXR 6 9 0 0 1381  | 1 | 686.8174 | 1371.62  | 2 | 59.85 | 5.40E-06 | GPSGVSVAQLAR  | Phospho (ST) | 0.0000001000000.0 | JC_Synth_SCX_3.2290.2290.2.dta |
| GPSGXVSAQLXR 0 4 4 0 89    | 1 | 618.7911 | 1235.568 | 2 | 51.8  | 0.00011  | GPSGAVSQAQLGR | Phospho (ST) | 0.0000001000000.0 | JC_Synth_SCX_9.1976.1976.2.dta |
| SXPFKXSPLXFGR 3 3 8 1 678  | 1 | 790.9005 | 1579.786 | 2 | 22.37 | 0.0064   | SFPFKSPLVFGK  | Phospho (ST) | 0.0000001000000.0 | JC_Synth_SCX_6.3404.3404.2.dta |
| SXPFKXSPLXFGR 5 5 0 0 1101 | 1 | 504.938  | 1511.792 | 3 | 25.22 | 0.0003   | SLPFKLSPLAFGR | Phospho (ST) | 0.0000001000000.0 | JC_Synth_SCX_7.3141.3141.3.dta |
| SXPFKXSPLXFGR 0 6 0 0 121  | 1 | 482.2384 | 1443.693 | 3 | 32.79 | 0.0022   | SAPFKSPLAFGR  | Phospho (ST) | 0.0000001000000.0 | JC_Synth_SCX_6.2188.2188.3.dta |
| SXPFKXSPLXFGR 7 3 3 1 1468 | 1 | 791.8901 | 1581.766 | 2 | 21.16 | 0.0092   | STPFKSPFLFGK  | Phospho (ST) | 0.0000001000000.0 | JC_Synth_SCX_6.3223.3223.2.dta |
| SXPFKXSPLXFGR 7 2 0 0 1441 | 1 | 758.8645 | 1515.715 | 2 | 27.78 | 0.0096   | STPFKESPLAFGR | Phospho (ST) | 0.0000001000000.0 | JC_Synth_SCX_8.2540.2540.2.dta |
| GPSGXVSAQLXR 6 4 1 0 1283  | 1 | 655.7914 | 1309.568 | 2 | 51.26 | 4.30E-05 | GPSGVSVAQLDR  | Phospho (ST) | 0.0000001000000.0 | JC_Synth_SCX_4.1857.1857.2.dta |
| SXPFKXSPLXFGR 4 3 4 1 870  | 1 | 724.8534 | 1447.692 | 2 | 37.67 | 0.00021  | SGPFKSPGLFGK  | Phospho (ST) | 0.0000001000000.0 | JC_Synth_SCX_6.2907.2907.2.dta |
| SXPFKXSPLXFGR 9 1 9 0 1839 | 1 | 552.9209 | 1655.741 | 3 | 62.51 | 1.40E-06 | SYPFKDSPLYFGR | Phospho (ST) | 0.0000001000000.0 | JC_Synth_SCX_6.2712.2712.3.dta |
| SXPFKXSPLXFGR 9 1 9 0 1839 | 1 | 552.9209 | 1655.741 | 3 | 34.5  | 0.00087  | SYPFKDSPLYFGR | Phospho (ST) | 0.0000001000000.0 | JC_Synth_SCX_9.2831.2831.3.dta |
| SXPFKXSPLXFGR 5 5 5 1 1112 | 1 | 763.9238 | 1525.833 | 2 | 26.31 | 0.0023   | SLPFKLSPLFGK  | Phospho (ST) | 0.0000001000000.0 | JC_Synth_SCX_6.3418.3418.2.dta |
| GPSGXVSAQLXR 4 9 3 1 988   | 1 | 695.8248 | 1389.635 | 2 | 35.73 | 0.0022   | GPSGVSVAQLFK  | Phospho (ST) | 0.0000001000000.0 | JC_Synth_SCX_4.2876.2876.2.dta |
| SXPFKXSPLXFGR 6 6 0 0 1321 | 1 | 487.57   | 1459.688 | 3 | 32.21 | 0.0024   | SSPFKSPSLAFGR | Phospho (ST) | 0.0000001000000.0 | JC_Synth_SCX_6.2210.2210.3.dta |
| SXPFKXSPLXFGR 2 5 3 0 507  | 1 | 535.6014 | 1603.782 | 3 | 52.74 | 1.30E-05 | SEPFKLSPLFGR  | Phospho (ST) | 0.0000001000000.0 | JC_Synth_SCX_6.3250.3250.2.dta |
| SXPFKXSPLXFGR 9 9 9 1 2000 | 1 | 838.8928 | 1675.771 | 2 | 24.69 | 0.0061   | SYPFKSPSLYFGK | Phospho (ST) | 0.0000001000000.0 | JC_Synth_SCX_6.2804.2804.2.dta |
| SXPFKXSPLXFGR 0 1 0 0 21   | 1 | 736.8514 | 1471.688 | 2 | 36.65 | 0.0011   | SAPFKDSPLAFGR | Phospho (ST) | 0.0000001000000.0 | JC_Synth_SCX_6.2442.2442.2.dta |
| SXPFKXSPLXFGR 0 3 5 0 71   | 1 | 773.8956 | 1545.777 | 2 | 26.83 | 0.0021   | SAPFKSPLFGR   | Phospho (ST) | 0.0000001000000.0 | JC_Synth_SCX_7.3175.3175.2.dta |
| SXPFKXSPLXFGR 4 3 4 0 869  | 1 | 738.8564 | 1475.698 | 2 | 39.72 | 0.00035  | SGPFKSPGLFGR  | Phospho (ST) | 0.0000001000000.0 | JC_Synth_SCX_8.2963.2963.2.dta |
| SXPFKXSPLXFGR 4 3 4 0 869  | 1 | 738.8564 | 1475.698 | 2 | 23.75 | 0.014    | SGPFKSPGLFGR  | Phospho (ST) | 0.0000001000000.0 | JC_Synth_SCX_9.2945.2945.2.dta |
| GPSGXVSAQLXR 6 5 5 1 1312  | 1 | 668.8482 | 1335.682 | 2 | 33.76 | 0.0026   | GPSGVSVAQLLK  | Phospho (ST) | 0.0000001000000.0 | JC_Synth_SCX_9.3015.3015.2.dta |
| SXPFKXSPLXFGR 5 9 2 0 1185 | 1 | 540.933  | 1619.777 | 3 | 23.35 | 0.014    | SLPFKSPLEFGR  | Phospho (ST) | 0.0000001000000.0 | JC_Synth_SCX_9.2891.2891.3.dta |
| SXPFKXSPLXFGR 4 0 3 0 807  | 1 | 497.5786 | 1489.714 | 3 | 24    | 0.01     | SLPFKSPLEFGR  | Phospho (ST) | 0.0000001000000.0 | JC_Synth_SCX_8.2833.2833.2.dta |
| SXPFKXSPLXFGR 0 1 9 0 39   | 1 | 782.8645 | 1563.715 | 2 | 30.95 | 0.0047   | SAPFKDSPLYFGR | Phospho (ST) | 0.0000001000000.0 | JC_Synth_SCX_7.2558.2558.2.dta |
| GPSGXVSAQLXR 5 3 5 0 1071  | 1 | 712.8695 | 1423.725 | 2 | 61.69 | 6.80E-07 | GPSGLVSAQLLR  | Phospho (ST) | 0.0000001000000.0 | JC_Synth_SCX_9.3464.3464.2.dta |
| GPSGXVSAQLXR 9 9 3 1 1988  | 1 | 748.8458 | 1495.677 | 2 | 28.11 | 0.015    | GPSGYVSAQLFK  | Phospho (ST) | 0.0000001000000.0 | JC_Synth_SCX_3.4733.4733.2.dta |
| SXPFKXSPLXFGR 7 5 8 1 1518 | 1 | 750.8978 | 1499.781 | 2 | 34    | 0.00096  | STPFKLSPLVFGK | Phospho (ST) | 0.0000001000000.0 | JC_Synth_SCX_9.2976.2976.2.dta |
| SXPFKXSPLXFGR 5 5 6 1 1114 | 1 | 500.9343 | 1499.781 | 3 | 22.44 | 0.014    | SLPFKLSPLFGK  | Phospho (ST) | 0.0000001000000.0 | JC_Synth_SCX_9.3084.3084.3.dta |
| SXPFKXSPLXFGR 2 2 2 1 446  | 1 | 787.8616 | 1573.709 | 2 | 20.5  | 0.014    | SEPFKESPLFGR  | Phospho (ST) | 0.0000001000000.0 | JC_Synth_SCX_6.2437.2437.2.dta |
| SXPFKXSPLXFGR 3 3 7 1 676  | 1 | 528.2625 | 1581.766 | 3 | 28.36 | 0.0018   | SFPFKSPLTFGK  | Phospho (ST) | 0.0000001000000.0 | JC_Synth_SCX_6.3291.3291.3.dta |
| SXPFKXSPLXFGR 2 9 6 0 593  | 1 | 532.249  | 1593.725 | 3 | 36.94 | 0.0011   | SEPFKSPSLFGR  | Phospho (ST) | 0.0000001000000.0 | JC_Synth_SCX_6.2700.2700.3.dta |
| GPSGXVSAQLXR 5 5 4 1 1110  | 1 | 653.8428 | 1305.671 | 2 | 45.71 | 0.00012  | GPSGLVSAQLGK  | Phospho (ST) | 0.0000001000000.0 | JC_Synth_SCX_3.2064.3064.2.dta |
| SXPFKXSPLXFGR 4 9 9 0 999  | 1 | 799.8749 | 1597.735 | 2 | 26.49 | 0.0037   | SGPFKSPLYFGR  | Phospho (ST) | 0.0000001000000.0 | JC_Synth_SCX_6.2741.2741.2.dta |
| SXPFKXSPLXFGR 7 3 9 1 1480 | 1 | 533.5941 | 1597.76  | 3 | 33.25 | 0.0012   | STPFKSPLYFGR  | Phospho (ST) | 0.0000001000000.0 | JC_Synth_SCX_8.3008.3008.3.dta |
| SXPFKXSPLXFGR 4 0 5 0 811  | 1 | 486.2505 | 1455.73  | 3 | 49.92 | 3.50E-05 | SGPFKASPLFGR  | Phospho (ST) | 0.0000001000000.0 | JC_Synth_SCX_6.2708.2708.3.dta |
| SXPFKXSPLXFGR 5 2 3 0 1047 | 1 | 802.8984 | 1603.782 | 2 | 31.15 | 0.0019   | SLPFKSPFLFGR  | Phospho (ST) | 0.0000001000000.0 | JC_Synth_SCX_6.2935.2935.2.dta |
| GPSGXVSAQLXR 1 4 9 0 299   | 1 | 693.8071 | 1385.6   | 2 | 45.85 | 9.80E-05 | GPSGDVSAQLYR  | Phospho (ST) | 0.0000001000000.0 | JC_Synth_SCX_5.2171.2171.2.dta |
| SXPFKXSPLXFGR 7 6 6 1 1534 | 1 | 488.2381 | 1461.693 | 3 | 41.22 | 0.00048  | STPFKSPSLFGK  | Phospho (ST) | 0.0000001000000.0 | JC_Synth_SCX_6.2356.2356.3.dta |
| GPSGXVSAQLXR 5 5 5 0 1111  | 1 | 695.8773 | 1389.74  | 2 | 58.8  | 2.60E-06 | GPSGLVSAQLLR  | Phospho (ST) | 0.0000001000000.0 | JC_Synth_SCX_2.3738.3738.2.dta |
| SXPFKXSPLXFGR 4 3 3 1 868  | 1 | 769.8768 | 1537.739 | 2 | 26.38 | 0.0023   | SFPFKSPLFGR   | Phospho (ST) | 0.0000001000000.0 | JC_Synth_SCX_6.3220.3220.3.dta |
| SXPFKXSPLXFGR 9 0 9 0 1819 | 1 | 806.8827 | 1611.751 | 2 | 44.13 | 9.30E-05 | SYPFKASPLYFGR | Phospho (ST) | 0.0000001000000.0 | JC_Synth_SCX_6.2715.2715.2.dta |
| SXPFKXSPLXFGR 0 0 5 0 11   | 1 | 735.8799 | 1469.745 | 2 | 23.17 | 0.0051   | SAPFKASPLFGR  | Phospho (ST) | 0.0000001000000.0 | JC_Synth_SCX_9.2720.2720.2.dta |
| SXPFKXSPLXFGR 2 2 7 1 456  | 1 | 516.2452 | 1545.714 | 3 | 25.82 | 0.0026   | SEPFKESPLTFGK | Phospho (ST) | 0.0000001000000.0 | JC_Synth_SCX_6.2239.2239.3.dta |
| GPSGXVSAQLXR 0 6 0 1 122   | 1 | 626.8011 | 1251.588 | 2 | 24.56 | 0.015    | GPSGAVSQAQLK  | Phospho (ST) | 0.0000001000000.0 | JC_Synth_SCX_2.5311.5311.2.dta |
| SXPFKXSPLXFGR 9 6 9 0 1939 | 1 | 814.8802 | 1627.746 | 2 | 38.7  | 0.00042  | SYPFKSPLYFGR  | Phospho (ST) | 0.0000001000000.0 | JC_Synth_SCX_6.2628.2628.2.dta |
| SXPFKXSPLXFGR 8 2 5 0 1651 | 1 | 778.8983 | 1555.782 | 2 | 32.21 | 0.0022   | SYPFKESPLFGR  | Phospho (ST) | 0.0000001000000.0 | JC_Synth_SCX_6.2719.2719.2.dta |
| GPSGXVSAQLXR 2 3 5 1 472   | 1 | 706.8456 | 1411.677 | 2 | 32.92 | 0.0019   | GPSGEVSAQLLK  | Phospho (ST) | 0.0000001000000.0 | JC_Synth_SCX_9.3074.3074.2.dta |
| SXPFKXSPLXFGR 9 5 0 0 1901 | 1 | 521.5978 | 1561.772 | 3 | 33.95 | 0.0011   | STPFKLSPLAFGR | Phospho (ST) | 0.0000001000000.0 | JC_Synth_SCX_7.3011.3011.3.dta |
| SXPFKXSPLXFGR 8 9 9 0 1799 | 1 | 820.8984 | 1639.782 | 2 | 33.78 | 0.00042  | SVPFKSPLYFGR  | Phospho (ST) | 0.0000001000000.0 | JC_Synth_SCX_6.2805.2805.2.dta |
| SXPFKXSPLXFGR 0 9 0 1 182  | 1 | 498.2467 | 1491.718 | 3 | 33.4  | 0.0026   | SAPFKASPLAFGR | Phospho (ST) | 0.0000001000000.0 | JC_Synth_SCX_9.2937.2937.3.dta |
| SXPFKXSPLXFGR 5 0 8 0 1017 | 1 | 500.2661 | 1497.777 | 3 | 55.52 | 4.20E-06 | SLPFKASPLVGR  | Phospho (ST) | 0.0000001000000.0 | JC_Synth_SCX_6.2832.2832.3.dta |
| SXPFKXSPLXFGR 0 8 5 0 171  | 1 | 749.8955 | 1497.777 | 2 | 29.19 | 0.0018   | SAPFKVSPLLFGR | Phospho (ST) | 0.0000001000000.0 | JC_Synth_SCX_9.2951.2951.2.dta |
| SXPFKXSPLXFGR 4 9 3 0 987  | 1 | 528.254  | 1581.74  | 3 | 50.75 | 8.40E-06 | SGPFKSPFLFGR  | Phospho (ST) | 0.0000001000000.0 | JC_Synth_SCX_6.2952.2952.3.dta |
| GPSGXVSAQLXR 4 6 9 0 939   | 1 | 453.5421 | 1357.605 | 3 | 36.17 | 0.00065  | GPSGVSVAQLYR  | Phospho (ST) | 0.0000001000000.0 | JC_Synth_SCX_3.1951.1951.3.dta |
| SXPFKXSPLXFGR 6 2 2 0 1325 | 1 | 506.9051 | 1517.694 | 3 | 30.81 | 0.0026   | SSPFKSPLEFGR  | Phospho (ST) | 0.0000001000000.0 | JC_Synth_SCX_6.2403.2403.3.dta |
| GPSGXVSAQLXR 0 8 3 0 167   | 1 | 684.8381 | 1367.662 | 2 | 40.12 | 0.00041  | GPSGAVSQAQLR  | Phospho (ST) | 0.0000001000000.0 | JC_Synth_SCX_9.2866.2866.2.dta |
| SXPFKXSPLXFGR 4 3 4 1 870  | 1 | 483.5713 | 1447.692 | 3 | 43.12 | 5.90E-05 | SGPFKSPGLFGK  | Phospho (ST) | 0.0000001000000.0 | JC_Synth_SCX_6.2909.2909.3.dta |
| SXPFKXSPLXFGR 1 5 5 1 312  | 1 | 510.2659 | 1527.776 | 3 | 60.47 | 3.90E-06 | SDPFKLSPLFGK  | Phospho (ST) | 0.0000001000000.0 | JC_Synth_SCX_6.3287.3287.3.dta |
| SXPFKXSPLXFGR 1 5 5 1 312  | 1 | 764.8952 | 1527.776 | 2 | 24.72 | 0.014    | SDPFKLSPLFGK  | Phospho (ST) | 0.0000001000000.0 | JC_Synth_SCX_6.3285.3285.2.dta |
| SXPFKXSPLXFGR 5 9 1 0 1183 | 1 | 536.261  | 1605.761 | 3 | 52.09 | 2.90E-05 | SLPFKSPDLFGR  | Phospho (ST) | 0.0000001000000.0 | JC_Synth_SCX_6.2957.2957.3.dta |
| SXPFKXSPLXFGR 0 3 5 0 71   | 1 | 516.2661 | 1545.777 | 3 | 48.71 | 1.30E-05 | SAPFKSPLFGR   | Phospho (ST) | 0.0000001000000.0 | JC_Synth_SCX_6.3170.3170.3.dta |
| SXPFKXSPLXFGR 0 5 3 0 107  | 1 | 516.2661 | 1545.777 | 3 | 20.34 | 0.0092   | SAPFKSPLFGR   | Phospho (ST) | 0.0000001000000.0 | JC_Synth_SCX_6.3518.3518.3.dta |
| SXPFKXSPLXFGR 6 8 8 1 1378 | 1 | 736.882  | 1471.75  | 2 | 24.76 | 0.0084   | SSPFKSPSLVFGK | Phospho (ST) | 0.0000001000000.0 | JC_Synth_SCX_8.2817.2817.2.dta |
| SXPFKXSPLXFGR 3 3 0 1 662  | 1 | 518.2589 | 1551.755 | 3 | 36.74 | 0.00022  | SFPFKSPLAFGR  | Phospho (ST) | 0.0000001000000.0 | JC_Synth_SCX_6.3277.3277.3.dta |
| GPSGXVSAQLXR 8 8 8 1 1778  | 1 | 660.8506 | 1319.687 | 2 | 43.22 | 0.00015  | GPSGVSVAQLVK  | Phospho (ST) | 0.0000001000000.0 | JC_Synth_SCX_5.2812.2812.2.dta |
| SXPFKXSPLXFGR 0 3 0 1 62   | 1 | 738.8689 | 1475.723 | 2 | 18.86 | 0.013    | SAPFKSPLAFGR  | Phospho (ST) | 0.0000001000000.0 | JC_Synth_SCX_6.2906.2906.2.dta |
| SXPFKXSPLXFGR 5 5 1 0 1103 | 1 | 519.6013 | 1555.782 | 3 | 47.01 | 7.20E-05 | SLPFKSPDLFGR  | Phospho (ST) | 0.0000001000000.0 | JC_Synth_SCX_6.3211.3211.3.dta |
| SXPFKXSPLXFGR 2 6 2 0 525  | 1 | 520.9086 | 1559.704 | 3 | 43.47 | 0.00032  | SEPFKSPLEFGR  | Phospho (ST) | 0.0000001000000.0 | JC_Synth_SCX_6.2231.2231.3.dta |
| SXPFKXSPLXFGR 4 9 6 1 994  | 1 | 498.9064 | 1493.698 | 3 | 60.29 | 8.20E-06 | SGPFKSPLYFGR  | Phospho (ST) | 0.0000001000000.0 | JC_Synth_SCX_6.2643.2643.3.dta |
| SXPFKXSPLXFGR 6 4 4 0 1289 | 1 | 708.8381 | 1415.662 | 2 | 39.81 | 0.00055  | SSPFKSPGLFGR  | Phospho (ST) | 0.0000001000000.0 | JC_Synth_SCX_6.2389.2389.2.dta |
| SXPFKXSPLXFGR 2 2 2 1 446  | 1 | 525.5768 | 1573.709 | 3 | 52.6  | 8.80E-06 | SEPFKESPLFGR  | Phospho (ST) | 0.0000001000000.0 | JC_Synth_SCX_6.2447.2447.3.dta |
| SXPFKXSPLXFGR 3 5 8 0 717  | 1 | 525.6099 | 1573.808 | 3 | 22.2  | 0.006    | SFPFKLSPLVGR  | Phospho (ST) | 0.0000001000000.0 | JC_Synth_SCX_6.3431.3431.3.dta |
| SXPFKXSPLXFGR 3 3 0 0 661  | 1 | 527.5942 | 1579.761 | 3 | 42.94 | 6.10E-05 | SFPFKSPLAFGR  | Phospho (ST) | 0.0000001000000.0 | JC_Synth_SCX_6.3315.3315.3.dta |
| GPSGXVSAQLXR 5 5 3 0 1107  | 1 | 712.8694 | 1423.724 | 2 | 44.49 | 3.60E-05 | GPSGLVSAQLFR  | Phospho (ST) | 0.0000001000000.0 | JC_Synth_SCX_5.3652.3652.2.dta |
| GPSGXVSAQLXR 6 4 8 1 1298  | 1 | 633.8089 | 1265.603 | 2 | 25.09 | 0.0042   | GPSGVSVAQLVK  | Phospho (ST) | 0.0000001000000.0 | JC_Synth_SCX_2.2293.2293.2.dta |
| GPSGXVSAQLXR 1 9 7 0 395   | 1 | 715.8201 | 1429.626 | 2 | 60.04 | 6.10E-06 | GPSGDVSAQLTR  | Phospho (ST) | 0.0000001000000.0 | JC_Synth_SCX_2.2384.2384.2.dta |
| SXPFKXSPLXFGR 4 6 0 0 921  | 1 | 477.5664 | 1429.677 | 3 | 35.18 | 0.0019   | SGPFKSPSLAFGR | Phospho (ST) | 0.0000001000000.0 | JC_Synth_SCX_6.2205.2205.3.dta |
| SXPFKXSPLXFGR 9 7 3 1 1948 | 1 | 533.594  | 1597.76  | 3 | 30.13 | 0.0024   | SYPFKTSPLFGR  | Phospho (ST) | 0.0000001000000.0 | JC_Synth_SCX_8.2602.2602.3.dta |
| SXPFKXSPLXFGR 6 4 0 0 1389 | 1 | 761.8591 | 1521.704 | 2 | 33.99 | 0.       |               |              |                   |                                |

|                             |   |          |          |   |       |          |                |              |                   |                                |
|-----------------------------|---|----------|----------|---|-------|----------|----------------|--------------|-------------------|--------------------------------|
| GPSGXVSAQQLXR 0 1 7 0 35    | 1 | 446.8737 | 1337.599 | 3 | 42.67 | 0.00026  | GPSGAVSDAQLTR  | Phospho (ST) | 0.0000001000000.0 | JC_Synth_SCX_2.1982.1982.3.dta |
| SXPFFKXSPXLFGR 6 3 4 0 1269 | 1 | 502.9102 | 1505.709 | 3 | 55.39 | 8.70E-06 | SSPFKFSPLGFR   | Phospho (ST) | 0.0000001000000.0 | JC_Synth_SCX_7.2977.2977.3.dta |
| SXPFFKXSPXLFGR 1 3 1 0 263  | 1 | 531.577  | 1591.709 | 3 | 53.06 | 2.20E-05 | SDPFKFSPLDFGR  | Phospho (ST) | 0.0000001000000.0 | JC_Synth_SCX_6.3155.3155.3.dta |
| SXPFFKXSPXLFGR 0 5 4 1 110  | 1 | 714.8688 | 1427.723 | 2 | 34.39 | 0.00087  | SAPFKLSPLGFGK  | Phospho (ST) | 0.0000001000000.0 | JC_Synth_SCX_9.2842.2842.3.dta |
| GPSGXVSAQQLXR 5 0 5 0 1011  | 1 | 674.8536 | 1347.693 | 2 | 72.33 | 5.80E-08 | GPSGLVSAQQLR   | Phospho (ST) | 0.0000001000000.0 | JC_Synth_SCX_2.3144.3144.2.dta |
| SXPFFKXSPXLFGR 4 8 3 0 967  | 1 | 506.9223 | 1517.745 | 3 | 29.15 | 0.0012   | SGPFKVSPLFFGR  | Phospho (ST) | 0.0000001000000.0 | JC_Synth_SCX_7.3048.3048.3.dta |
| SXPFFKXSPXLFGR 2 9 8 0 597  | 1 | 536.261  | 1605.761 | 3 | 31.09 | 0.0037   | SEPFKYSPLVFR   | Phospho (ST) | 0.0000001000000.0 | JC_Synth_SCX_7.2801.2801.3.dta |
| GPSGXVSAQQLXR 0 5 3 1 108   | 1 | 677.8428 | 1353.671 | 2 | 30.68 | 0.0032   | GPSGAVSQAQLR   | Phospho (ST) | 0.0000001000000.0 | JC_Synth_SCX_9.3203.3203.2.dta |
| SXPFFKXSPXLFGR 4 5 4 0 909  | 1 | 481.5785 | 1441.714 | 3 | 71.84 | 4.20E-07 | SGPFKLSPLGFR   | Phospho (ST) | 0.0000001000000.0 | JC_Synth_SCX_6.2635.2635.3.dta |
| SXPFFKXSPXLFGR 9 9 6 0 1993 | 1 | 543.5891 | 1627.746 | 3 | 33.19 | 0.0015   | SYPFKYSPLSFR   | Phospho (ST) | 0.0000001000000.0 | JC_Synth_SCX_7.2815.2815.3.dta |
| GPSGXVSAQQLXR 9 0 1 1 1804  | 1 | 686.8116 | 1371.609 | 2 | 34.66 | 0.0024   | GPSGVYSAQQLDK  | Phospho (ST) | 0.0000001000000.0 | JC_Synth_SCX_2.4924.4924.2.dta |
| SXPFFKXSPXLFGR 0 3 5 0 71   | 1 | 516.2661 | 1545.776 | 3 | 18.82 | 0.013    | SAPFKFSPLFFGR  | Phospho (ST) | 0.0000001000000.0 | JC_Synth_SCX_9.3153.3153.3.dta |
| SXPFFKXSPXLFGR 4 0 3 1 808  | 1 | 731.861  | 1461.708 | 2 | 28.12 | 0.0025   | SGPFKASPLFFGK  | Phospho (ST) | 0.0000001000000.0 | JC_Synth_SCX_8.2804.2804.2.dta |
| SXPFFKXSPXLFGR 2 9 2 0 585  | 1 | 818.8749 | 1635.735 | 2 | 43.11 | 0.00015  | SEPFKYSPLFFGR  | Phospho (ST) | 0.0000001000000.0 | JC_Synth_SCX_6.2709.2709.2.dta |
| GPSGXVSAQQLXR 3 0 5 0 611   | 1 | 691.8458 | 1381.677 | 2 | 29.29 | 0.0018   | GPSGVYSAQQLR   | Phospho (ST) | 0.0000001000000.0 | JC_Synth_SCX_5.3046.3046.2.dta |
| SXPFFKXSPXLFGR 5 6 5 1 1314 | 1 | 492.2501 | 1473.729 | 3 | 59.06 | 4.80E-06 | SSPFKLSPLSFGK  | Phospho (ST) | 0.0000001000000.0 | JC_Synth_SCX_6.2859.2859.3.dta |
| SXPFFKXSPXLFGR 4 2 9 0 859  | 1 | 522.2453 | 1563.714 | 3 | 42.28 | 0.00034  | SGPFKESPLYFR   | Phospho (ST) | 0.0000001000000.0 | JC_Synth_SCX_7.2569.2569.3.dta |
| SXPFFKXSPXLFGR 5 5 2 0 1105 | 1 | 524.2731 | 1569.797 | 3 | 64.36 | 1.00E-06 | SLPFKLSPLFFGR  | Phospho (ST) | 0.0000001000000.0 | JC_Synth_SCX_6.3150.3150.3.dta |
| SXPFFKXSPXLFGR 7 0 8 0 1417 | 1 | 743.8772 | 1485.74  | 2 | 27.35 | 0.0061   | STPFKASPLVFR   | Phospho (ST) | 0.0000001000000.0 | JC_Synth_SCX_8.2626.2626.2.dta |
| SXPFFKXSPXLFGR 2 2 2 1 446  | 1 | 787.8614 | 1573.708 | 2 | 22.92 | 0.0082   | SEPFKESPLFFGR  | Phospho (ST) | 0.0000001000000.0 | JC_Synth_SCX_5.2462.2462.2.dta |
| SXPFFKXSPXLFGR 3 0 4 0 609  | 1 | 745.8641 | 1489.714 | 2 | 29.91 | 0.0026   | SYPFKASPLGFR   | Phospho (ST) | 0.0000001000000.0 | JC_Synth_SCX_6.2835.2835.2.dta |
| GPSGXVSAQQLXR 5 0 5 1 1012  | 1 | 660.8505 | 1319.687 | 2 | 54.02 | 1.30E-05 | GPSGLVSAQQLR   | Phospho (ST) | 0.0000001000000.0 | JC_Synth_SCX_2.3120.3120.2.dta |
| SXPFFKXSPXLFGR 0 5 8 0 117  | 1 | 749.8954 | 1497.776 | 2 | 39.15 | 0.00018  | SAPFKLSPLVFR   | Phospho (ST) | 0.0000001000000.0 | JC_Synth_SCX_6.2986.2986.2.dta |
| SXPFFKXSPXLFGR 6 4 4 0 1289 | 1 | 708.838  | 1415.662 | 2 | 40.94 | 0.00042  | SSPFKGSPLGFR   | Phospho (ST) | 0.0000001000000.0 | JC_Synth_SCX_7.2427.2427.2.dta |
| SXPFFKXSPXLFGR 0 5 3 1 108  | 1 | 506.9306 | 1517.77  | 3 | 67.77 | 2.80E-07 | SAPFKLSPLFFGK  | Phospho (ST) | 0.0000001000000.0 | JC_Synth_SCX_6.3178.3178.3.dta |
| SXPFFKXSPXLFGR 3 8 3 0 767  | 1 | 804.9033 | 1607.792 | 2 | 36.16 | 0.00039  | SYPFKVSPLFFGR  | Phospho (ST) | 0.0000001000000.0 | JC_Synth_SCX_6.3403.3403.2.dta |
| GPSGXVSAQQLXR 2 5 3 0 507   | 1 | 720.8486 | 1439.683 | 2 | 55.55 | 9.10E-06 | GPSGEVSAQLFR   | Phospho (ST) | 0.0000001000000.0 | JC_Synth_SCX_3.3372.3372.2.dta |
| SXPFFKXSPXLFGR 3 3 4 1 670  | 1 | 513.5869 | 1537.739 | 3 | 39.55 | 0.00011  | SFPFKSPLGFGK   | Phospho (ST) | 0.0000001000000.0 | JC_Synth_SCX_6.3286.3286.3.dta |
| SXPFFKXSPXLFGR 0 2 2 0 45   | 1 | 515.5769 | 1543.709 | 3 | 57.29 | 1.40E-05 | SAPFKESPLFFGR  | Phospho (ST) | 0.0000001000000.0 | JC_Synth_SCX_6.2438.2438.3.dta |
| SXPFFKXSPXLFGR 4 5 0 0 901  | 1 | 486.2503 | 1455.729 | 3 | 34.89 | 0.0011   | SGPFKLSPLAFGR  | Phospho (ST) | 0.0000001000000.0 | JC_Synth_SCX_9.2877.2877.3.dta |
| SXPFFKXSPXLFGR 0 5 4 0 109  | 1 | 728.8718 | 1455.729 | 2 | 29.31 | 0.004    | SAPFKLSPLGFR   | Phospho (ST) | 0.0000001000000.0 | JC_Synth_SCX_9.2874.2874.2.dta |
| SXPFFKXSPXLFGR 7 5 3 1 1508 | 1 | 774.8976 | 1547.781 | 2 | 30.12 | 0.003    | STPFKLSPLFFGK  | Phospho (ST) | 0.0000001000000.0 | JC_Synth_SCX_6.3194.3194.2.dta |
| SXPFFKXSPXLFGR 7 6 6 1 1534 | 1 | 488.238  | 1461.692 | 3 | 35.13 | 0.0002   | STPFKLSPLSFGK  | Phospho (ST) | 0.0000001000000.0 | JC_Synth_SCX_7.2198.2198.3.dta |
| GPSGXVSAQQLXR 9 0 1 1 1804  | 1 | 686.8116 | 1371.609 | 2 | 29.66 | 0.0075   | GPSGVYSAQQLDK  | Phospho (ST) | 0.0000001000000.0 | JC_Synth_SCX_2.4632.4632.2.dta |
| SXPFFKXSPXLFGR 1 5 5 0 311  | 1 | 778.8981 | 1555.782 | 2 | 57.68 | 6.10E-06 | SDPFKLSPLFFGR  | Phospho (ST) | 0.0000001000000.0 | JC_Synth_SCX_6.3346.3346.2.dta |
| SXPFFKXSPXLFGR 9 9 1 0 1983 | 1 | 828.8774 | 1655.74  | 2 | 24.44 | 0.0088   | SYPFKYSPLDFGR  | Phospho (ST) | 0.0000001000000.0 | JC_Synth_SCX_9.2835.2835.2.dta |
| SXPFFKXSPXLFGR 8 3 5 0 1671 | 1 | 787.911  | 1573.808 | 2 | 43.33 | 4.60E-05 | SVPFKFSPLFFGR  | Phospho (ST) | 0.0000001000000.0 | JC_Synth_SCX_6.3283.3283.2.dta |
| SXPFFKXSPXLFGR 6 6 2 1 1326 | 1 | 497.5696 | 1489.687 | 3 | 80.55 | 2.70E-08 | SSPFKSSPLFFGK  | Phospho (ST) | 0.0000001000000.0 | JC_Synth_SCX_6.2366.2366.3.dta |
| SXPFFKXSPXLFGR 4 0 3 0 807  | 1 | 497.5784 | 1489.714 | 3 | 26.73 | 0.0054   | SGPFKASPLFFGR  | Phospho (ST) | 0.0000001000000.0 | JC_Synth_SCX_9.2813.2813.3.dta |
| SXPFFKXSPXLFGR 5 9 3 1 1188 | 1 | 537.606  | 1609.796 | 3 | 20.88 | 0.0098   | SPLPFKVSPLFFGK | Phospho (ST) | 0.0000001000000.0 | JC_Synth_SCX_6.3292.3292.3.dta |
| SXPFFKXSPXLFGR 9 0 9 0 1819 | 1 | 538.2574 | 1611.75  | 3 | 55.1  | 7.40E-06 | SYPFKASPLYFR   | Phospho (ST) | 0.0000001000000.0 | JC_Synth_SCX_6.2717.2717.3.dta |
| SXPFFKXSPXLFGR 0 8 0 1 162  | 1 | 714.8687 | 1427.723 | 2 | 30.66 | 0.0034   | SAPFKVSPALFGR  | Phospho (ST) | 0.0000001000000.0 | JC_Synth_SCX_6.2826.2826.2.dta |
| SXPFFKXSPXLFGR 6 4 8 1 1298 | 1 | 715.8583 | 1429.702 | 2 | 31.17 | 0.0049   | SAPFKVSPLVFR   | Phospho (ST) | 0.0000001000000.0 | JC_Synth_SCX_9.2675.2675.2.dta |
| SXPFFKXSPXLFGR 2 1 9 0 439  | 1 | 541.5804 | 1621.72  | 3 | 44    | 0.0002   | SEPFKDSPLYFR   | Phospho (ST) | 0.0000001000000.0 | JC_Synth_SCX_6.2575.2575.3.dta |
| GPSGXVSAQQLXR 3 1 2 0 625   | 1 | 721.8199 | 1441.625 | 2 | 55.58 | 1.40E-05 | GPSGVYSDAQLER  | Phospho (ST) | 0.0000001000000.0 | JC_Synth_SCX_4.2443.2443.2.dta |
| SXPFFKXSPXLFGR 9 3 1 0 1863 | 1 | 547.5891 | 1639.745 | 3 | 24.37 | 0.0082   | SYPFKSPLDFGR   | Phospho (ST) | 0.0000001000000.0 | JC_Synth_SCX_6.3147.3147.3.dta |
| GPSGXVSAQQLXR 6 5 5 0 1311  | 1 | 682.851  | 1363.688 | 2 | 46.16 | 9.20E-05 | GPSGVYSAQQLR   | Phospho (ST) | 0.0000001000000.0 | JC_Synth_SCX_8.3067.3067.2.dta |
| GPSGXVSAQQLXR 6 2 8 0 1257  | 1 | 683.8224 | 1365.63  | 2 | 40.9  | 0.00039  | GPSGVYSEQLVR   | Phospho (ST) | 0.0000001000000.0 | JC_Synth_SCX_3.2210.2210.2.dta |
| GPSGXVSAQQLXR 9 6 9 0 1939  | 1 | 732.8303 | 1463.646 | 2 | 71.27 | 3.70E-07 | GPSGVYSAQLYR   | Phospho (ST) | 0.0000001000000.0 | JC_Synth_SCX_3.2371.2371.2.dta |
| GPSGXVSAQQLXR 2 6 7 0 535   | 1 | 684.8121 | 1367.61  | 2 | 52.81 | 1.30E-05 | GPSGEVSAQQLTR  | Phospho (ST) | 0.0000001000000.0 | JC_Synth_SCX_4.2015.2015.2.dta |
| SXPFFKXSPXLFGR 3 9 3 0 787  | 1 | 558.2695 | 1671.787 | 3 | 48.65 | 2.00E-05 | SFPFKYSPLFFGR  | Phospho (ST) | 0.0000001000000.0 | JC_Synth_SCX_6.3292.3292.3.dta |
| SXPFFKXSPXLFGR 4 4 4 0 889  | 1 | 693.8326 | 1385.651 | 2 | 38.68 | 0.00083  | SGPFKGSPLGFR   | Phospho (ST) | 0.0000001000000.0 | JC_Synth_SCX_8.2442.2442.2.dta |
| SXPFFKXSPXLFGR 5 5 6 1 1114 | 1 | 500.9341 | 1499.78  | 3 | 67.55 | 4.70E-07 | SLPFKLSPLSFGK  | Phospho (ST) | 0.0000001000000.0 | JC_Synth_SCX_6.3096.3096.3.dta |
| SXPFFKXSPXLFGR 0 6 4 1 130  | 1 | 468.2309 | 1401.671 | 3 | 52.69 | 5.00E-05 | SAPFKSPLGFGK   | Phospho (ST) | 0.0000001000000.0 | JC_Synth_SCX_6.2315.2315.3.dta |
| SXPFFKXSPXLFGR 9 9 9 0 1999 | 1 | 568.9328 | 1703.777 | 3 | 51.7  | 6.80E-06 | SYPFKYSPLYFR   | Phospho (ST) | 0.0000001000000.0 | JC_Synth_SCX_6.2845.2845.3.dta |
| SXPFFKXSPXLFGR 5 9 5 0 1191 | 1 | 802.9163 | 1603.818 | 2 | 19.67 | 0.011    | SLPFKYSPLFFGR  | Phospho (ST) | 0.0000001000000.0 | JC_Synth_SCX_6.3386.3386.2.dta |
| SXPFFKXSPXLFGR 4 5 3 1 908  | 1 | 752.8844 | 1503.754 | 2 | 30.03 | 0.0021   | SYPFKLSPLFFGK  | Phospho (ST) | 0.0000001000000.0 | JC_Synth_SCX_6.3511.3511.2.dta |
| SXPFFKXSPXLFGR 9 7 2 0 1945 | 1 | 804.8773 | 1607.74  | 2 | 41.76 | 0.00029  | SYPFKSPLFFGR   | Phospho (ST) | 0.0000001000000.0 | JC_Synth_SCX_6.2644.2644.2.dta |
| GPSGXVSAQQLXR 2 3 1 1 464   | 1 | 707.8168 | 1413.619 | 2 | 25.64 | 0.013    | GPSGEVSAQQLDK  | Phospho (ST) | 0.0000001000000.0 | JC_Synth_SCX_3.4908.4908.2.dta |
| SXPFFKXSPXLFGR 2 1 9 0 439  | 1 | 811.8669 | 1621.719 | 2 | 29.63 | 0.0054   | SEPFKDSPLYFR   | Phospho (ST) | 0.0000001000000.0 | JC_Synth_SCX_6.2573.2573.2.dta |
| SXPFFKXSPXLFGR 9 9 6 0 1993 | 1 | 543.589  | 1627.745 | 3 | 64.02 | 1.20E-06 | SYPFKYSPLSFR   | Phospho (ST) | 0.0000001000000.0 | JC_Synth_SCX_6.2787.2787.3.dta |
| SXPFFKXSPXLFGR 0 2 5 0 51   | 1 | 510.2573 | 1527.75  | 3 | 38.83 | 0.00056  | SAPFKESPLFFGR  | Phospho (ST) | 0.0000001000000.0 | JC_Synth_SCX_6.2637.2637.3.dta |
| GPSGXVSAQQLXR 6 7 1 1 1344  | 1 | 663.8011 | 1325.588 | 2 | 30.69 | 0.0028   | GPSGSVSTAQLDK  | Phospho (ST) | 0.0000001000000.0 | JC_Synth_SCX_9.1960.1960.2.dta |
| GPSGXVSAQQLXR 5 0 5 0 1011  | 1 | 674.8535 | 1347.693 | 2 | 72.27 | 5.90E-08 | GPSGLVSAQQLR   | Phospho (ST) | 0.0000001000000.0 | JC_Synth_SCX_9.2969.2969.2.dta |
| GPSGXVSAQQLXR 5 0 5 0 1011  | 1 | 674.8535 | 1347.693 | 2 | 65    | 3.20E-07 | GPSGLVSAQQLR   | Phospho (ST) | 0.0000001000000.0 | JC_Synth_SCX_5.3010.3010.2.dta |
| SXPFFKXSPXLFGR 9 9 3 1 1988 | 1 | 554.2657 | 1659.775 | 3 | 55.87 | 5.80E-06 | SYPFKYSPLFFGK  | Phospho (ST) | 0.0000001000000.0 | JC_Synth_SCX_6.3002.3002.3.dta |
| SXPFFKXSPXLFGR 8 1 2 0 1625 | 1 | 779.8694 | 1557.724 | 2 | 39.69 | 0.00084  | SVPFKDSPLFFGR  | Phospho (ST) | 0.0000001000000.0 | JC_Synth_SCX_6.2556.2556.2.dta |
| SXPFFKXSPXLFGR 4 0 5 0 811  | 1 | 486.2502 | 1455.729 | 3 | 34.8  | 0.0011   | SYPFKASPLFFGR  | Phospho (ST) | 0.0000001000000.0 | JC_Synth_SCX_8.2747.2747.3.dta |
| GPSGXVSAQQLXR 1 6 5 0 331   | 1 | 683.8224 | 1365.63  | 2 | 59.57 | 5.30E-06 | GPSGDVYSAQQLR  | Phospho (ST) | 0.0000001000000.0 | JC_Synth_SCX_2.2448.2448.2.dta |
| GPSGXVSAQQLXR 9 5 3 0 1907  | 1 | 737.8588 | 1473.703 | 2 | 25.42 | 0.01     | GPSGVYSAQLFR   | Phospho (ST) | 0.0000001000000.0 | JC_Synth_SCX_9.3366.3366.2.dta |
| SXPFFKXSPXLFGR 6 7 0 0 1341 | 1 | 492.2416 | 1473.703 | 3 | 25.3  | 0.011    | SSPFTKSPALFGR  | Phospho (ST) | 0.0000001000000.0 | JC_Synth_SCX_8.2297.2297.3.dta |
| GPSGXVSAQQLXR 7 3 0 0 1461  | 1 | 685.8275 | 1369.641 | 2 | 42.47 | 0.0001   | GPSGTVYSAQLR   | Phospho (ST) | 0.0000001000000.0 | JC_Synth_SCX_3.2692.2692.2.dta |
| SXPFFKXSPXLFGR 9 3 3 0 1987 | 1 | 563.6011 | 1687.782 | 3 | 47.45 | 2.70E-05 | SYPFKYSPLFFGR  | Phospho (ST) | 0.0000001000000.0 | JC_Synth_SCX_6.3047.3047.3.dta |
| SXPFFKXSPXLFGR 9 0 3 0 1807 | 1 | 798.8849 | 1595.755 | 2 | 35.37 | 0.00039  | SYPFKASPLFFGR  | Phospho (ST) | 0.0000001000000.0 | JC_Synth_SCX_6.2914.2914.2.dta |
| SXPFFKXSPXLFGR 9 9 9 0 1999 | 1 | 852.8955 | 1703.777 | 2 | 44.61 | 3.50E-05 | SYPFKYSPLYFR   | Phospho (ST) | 0.0000001000000.0 | JC_Synth_SCX_6.2844.2844.2.dta |
| GPSGXVSAQQLXR 9 0 5 0 1811  | 1 | 699.8431 | 1397.672 | 2 | 45    | 8.50E-05 | GPSGVYSAQQLR   | Phospho (ST) | 0.0000001000000.0 | JC_Synth_SCX_5.2778.2778.2.dta |
| SXPFFKXSPXLFGR 4 9 0 0 981  | 1 | 502.91   | 1505.708 | 3 | 45.7  | 8.10E-05 | SGPFKYSPLAFGR  | Phospho (ST) | 0.0000001000000.0 | JC_Synth_SCX_7.2700.2700.3.dta |
| SXPFFKXSPXLFGR 4 3 6 0 873  | 1 | 502.91   | 1505.708 | 3 | 32.39 | 0.001    |                |              |                   |                                |



|                            |   |          |          |   |       |          |                |              |                   |                                |
|----------------------------|---|----------|----------|---|-------|----------|----------------|--------------|-------------------|--------------------------------|
| GPSGXVSAQQLXR 0 5 0 111    | 1 | 674.8534 | 1347.692 | 2 | 26.43 | 0.0023   | GPSGAVSLAQLLR  | Phospho (ST) | 0.0000001000000.0 | JC_Synth_SCX_8.3142.3142.2.dta |
| SXPFKXSPXLFGR 0 1 0 0 21   | 1 | 491.5697 | 1471.687 | 3 | 59.15 | 6.30E-06 | SAPFKDSPAFLGR  | Phospho (ST) | 0.0000001000000.0 | JC_Synth_SCX_6.2443.2443.3.dta |
| GPSGXVSAQQLXR 1 5 0 0 301  | 1 | 675.8248 | 1349.635 | 2 | 37.75 | 0.00066  | GPSGDVSLAQLR   | Phospho (ST) | 0.0000001000000.0 | JC_Synth_SCX_3.4579.4579.2.dta |
| SXPFKXSPXLFGR 4 1 3 1 828  | 1 | 502.9062 | 1505.697 | 3 | 51.96 | 2.70E-05 | SGPFKDSPLFFGK  | Phospho (ST) | 0.0000001000000.0 | JC_Synth_SCX_6.2743.2743.3.dta |
| GPSGXVSAQQLXR 4 6 0 0 921  | 1 | 633.796  | 1265.578 | 2 | 50.83 | 7.10E-05 | GPSGVVSAQQLR   | Phospho (ST) | 0.0000001000000.0 | JC_Synth_SCX_5.2009.2009.2.dta |
| GPSGXVSAQQLXR 9 3 9 0 1879 | 1 | 762.8484 | 1523.682 | 2 | 27.9  | 0.0097   | GPSGVVSAQQLR   | Phospho (ST) | 0.0000001000000.0 | JC_Synth_SCX_3.5020.5020.2.dta |
| SXPFKXSPXLFGR 5 6 0 0 1113 | 1 | 764.9004 | 1527.786 | 2 | 28.54 | 0.0022   | SLPFKLSPLFGR   | Phospho (ST) | 0.0000001000000.0 | JC_Synth_SCX_7.3140.3140.2.dta |
| SXPFKXSPXLFGR 9 9 9 1 2000 | 1 | 559.5973 | 1675.77  | 3 | 58.88 | 2.30E-06 | SYPFKYSPLYFGK  | Phospho (ST) | 0.0000001000000.0 | JC_Synth_SCX_6.2807.2807.3.dta |
| SXPFKXSPXLFGR 8 3 5 0 1671 | 1 | 525.6096 | 1573.807 | 3 | 73.46 | 4.50E-08 | SVPFKFSPLLFGR  | Phospho (ST) | 0.0000001000000.0 | JC_Synth_SCX_6.3284.3284.3.dta |
| GPSGXVSAQQLXR 4 4 3 0 887  | 1 | 656.8064 | 1311.598 | 2 | 75.24 | 1.40E-07 | GPSGGVSAQQLFR  | Phospho (ST) | 0.0000001000000.0 | JC_Synth_SCX_4.2544.2544.2.dta |
| GPSGXVSAQQLXR 5 6 0 0 1121 | 1 | 661.8273 | 1321.64  | 2 | 67.95 | 4.40E-07 | GPSGLVSAQQLR   | Phospho (ST) | 0.0000001000000.0 | JC_Synth_SCX_4.2375.2375.2.dta |
| GPSGXVSAQQLXR 0 8 7 0 175  | 1 | 661.8273 | 1321.64  | 2 | 57.17 | 5.30E-06 | GPSGAVSVAQLTR  | Phospho (ST) | 0.0000001000000.0 | JC_Synth_SCX_6.2115.2115.2.dta |
| GPSGXVSAQQLXR 9 6 9 0 1939 | 1 | 732.8301 | 1463.646 | 2 | 38.52 | 0.00069  | GPSGVVSAQQLYR  | Phospho (ST) | 0.0000001000000.0 | JC_Synth_SCX_3.5307.5307.2.dta |
| SXPFKXSPXLFGR 7 3 9 1 1480 | 1 | 533.5938 | 1597.759 | 3 | 56.47 | 5.50E-06 | STPFKFSPLYFGK  | Phospho (ST) | 0.0000001000000.0 | JC_Synth_SCX_6.2988.2988.3.dta |
| SXPFKXSPXLFGR 5 2 3 0 1047 | 1 | 535.601  | 1603.781 | 3 | 39.56 | 0.00028  | SLPFKESPLFFGR  | Phospho (ST) | 0.0000001000000.0 | JC_Synth_SCX_6.2943.2943.3.dta |
| SXPFKXSPXLFGR 7 8 6 1 1574 | 1 | 492.2499 | 1473.728 | 3 | 39.31 | 0.00046  | STPFKFSPLSFGK  | Phospho (ST) | 0.0000001000000.0 | JC_Synth_SCX_5.2730.2730.3.dta |
| SXPFKXSPXLFGR 4 3 6 1 874  | 1 | 739.8582 | 1477.702 | 2 | 30.37 | 0.0065   | SGPFKFSPLSFGK  | Phospho (ST) | 0.0000001000000.0 | JC_Synth_SCX_8.2589.2589.2.dta |
| SXPFKXSPXLFGR 0 5 8 0 117  | 1 | 500.2658 | 1497.776 | 3 | 62.46 | 8.50E-07 | SAPFKLSPLVFR   | Phospho (ST) | 0.0000001000000.0 | JC_Synth_SCX_6.2990.2990.3.dta |
| SXPFKXSPXLFGR 1 6 6 0 333  | 1 | 502.2329 | 1503.677 | 3 | 24.36 | 0.012    | SDPFKSSPLSFR   | Phospho (ST) | 0.0000001000000.0 | JC_Synth_SCX_7.2352.2352.3.dta |
| SXPFKXSPXLFGR 5 2 4 0 1049 | 1 | 757.8743 | 1513.734 | 2 | 34.63 | 0.0021   | SLPFKESPLGFR   | Phospho (ST) | 0.0000001000000.0 | JC_Synth_SCX_6.2659.2659.2.dta |
| GPSGXVSAQQLXR 3 9 9 0 799  | 1 | 762.8483 | 1523.682 | 2 | 31.84 | 0.0039   | GPSGVVSAQQLYR  | Phospho (ST) | 0.0000001000000.0 | JC_Synth_SCX_3.3044.3044.2.dta |
| SXPFKXSPXLFGR 1 5 2 0 305  | 1 | 786.8771 | 1571.74  | 2 | 34.86 | 0.0024   | SDPFKLSPLFGR   | Phospho (ST) | 0.0000001000000.0 | JC_Synth_SCX_6.3018.3018.2.dta |
| SXPFKXSPXLFGR 6 8 4 1 1370 | 1 | 715.8581 | 1429.702 | 2 | 27.58 | 0.011    | SSPFKVSPLGFR   | Phospho (ST) | 0.0000001000000.0 | JC_Synth_SCX_8.2699.2699.2.dta |
| SXPFKXSPXLFGR 7 6 4 1 1530 | 1 | 716.8477 | 1431.681 | 2 | 30.69 | 0.0055   | STPFKSSPLGFR   | Phospho (ST) | 0.0000001000000.0 | JC_Synth_SCX_6.2322.2322.2.dta |
| SXPFKXSPXLFGR 2 6 9 0 539  | 1 | 797.8693 | 1593.724 | 2 | 28.13 | 0.0085   | SEPFKSSPLYFR   | Phospho (ST) | 0.0000001000000.0 | JC_Synth_SCX_6.2511.2511.2.dta |
| SXPFKXSPXLFGR 9 2 8 0 1857 | 1 | 803.8875 | 1605.76  | 2 | 44.54 | 0.00017  | SYPFKESPLVFR   | Phospho (ST) | 0.0000001000000.0 | JC_Synth_SCX_6.2672.2672.2.dta |
| SXPFKXSPXLFGR 5 9 3 0 1187 | 1 | 546.9412 | 1637.802 | 3 | 31.07 | 0.0011   | SLPFKYSPLFFGR  | Phospho (ST) | 0.0000001000000.0 | JC_Synth_SCX_6.3171.3171.3.dta |
| SXPFKXSPXLFGR 6 5 6 0 1313 | 1 | 751.8743 | 1501.734 | 2 | 43.51 | 6.70E-05 | SSPFKLSPLSFR   | Phospho (ST) | 0.0000001000000.0 | JC_Synth_SCX_6.2890.2890.2.dta |
| GPSGXVSAQQLXR 6 4 9 0 1299 | 1 | 679.8091 | 1357.604 | 2 | 46.81 | 5.60E-05 | GPSGVVSAQQLYR  | Phospho (ST) | 0.0000001000000.0 | JC_Synth_SCX_3.1946.1946.2.dta |
| GPSGXVSAQQLXR 2 7 6 0 553  | 1 | 684.8118 | 1367.609 | 2 | 24.18 | 0.0092   | GPSGEVSTAQLSR  | Phospho (ST) | 0.0000001000000.0 | JC_Synth_SCX_4.1876.1876.2.dta |
| SXPFKXSPXLFGR 0 0 9 0 19   | 1 | 760.869  | 1519.724 | 2 | 27.96 | 0.0043   | SAPFKASPLYFR   | Phospho (ST) | 0.0000001000000.0 | JC_Synth_SCX_9.2580.2580.2.dta |
| SXPFKXSPXLFGR 6 9 4 0 1389 | 1 | 761.8586 | 1521.703 | 2 | 32.78 | 0.0019   | SSPFKYSPLGFR   | Phospho (ST) | 0.0000001000000.0 | JC_Synth_SCX_6.2666.2666.2.dta |
| SXPFKXSPXLFGR 6 3 5 1 1272 | 1 | 512.262  | 1533.764 | 3 | 54.16 | 1.60E-05 | SYPFKFSPLFFGK  | Phospho (ST) | 0.0000001000000.0 | JC_Synth_SCX_6.3149.3149.3.dta |
| SXPFKXSPXLFGR 9 3 0 0 1861 | 1 | 798.8846 | 1595.755 | 2 | 21.06 | 0.011    | SSPFKFSPLAFLR  | Phospho (ST) | 0.0000001000000.0 | JC_Synth_SCX_6.3066.3066.2.dta |
| GPSGXVSAQQLXR 5 4 4 0 1089 | 1 | 639.8141 | 1277.614 | 2 | 59.63 | 1.20E-05 | GPSGLVSAQQLGR  | Phospho (ST) | 0.0000001000000.0 | JC_Synth_SCX_5.2339.2339.2.dta |
| SXPFKXSPXLFGR 4 9 9 0 999  | 1 | 533.5853 | 1597.734 | 3 | 48.21 | 2.50E-05 | SGPFKYSPLYFR   | Phospho (ST) | 0.0000001000000.0 | JC_Synth_SCX_6.2748.2748.3.dta |
| SXPFKXSPXLFGR 4 8 7 1 976  | 1 | 722.8659 | 1443.717 | 2 | 27.82 | 0.011    | SSPFKVSPLTFGK  | Phospho (ST) | 0.0000001000000.0 | JC_Synth_SCX_7.2878.2878.2.dta |
| GPSGXVSAQQLXR 9 6 3 0 1927 | 1 | 483.5575 | 1447.651 | 3 | 26.86 | 0.013    | GPSGVVSAQQLFR  | Phospho (ST) | 0.0000001000000.0 | JC_Synth_SCX_3.2742.2742.3.dta |
| GPSGXVSAQQLXR 6 4 8 0 1297 | 1 | 647.8116 | 1293.609 | 2 | 77.81 | 9.40E-08 | GPSGVVSAQQLYR  | Phospho (ST) | 0.0000001000000.0 | JC_Synth_SCX_5.2138.2138.2.dta |
| SXPFKXSPXLFGR 1 9 2 0 385  | 1 | 541.5802 | 1621.719 | 3 | 33.53 | 0.0022   | SDPFKYSPLFGR   | Phospho (ST) | 0.0000001000000.0 | JC_Synth_SCX_6.2806.2806.3.dta |
| SXPFKXSPXLFGR 9 6 9 0 1939 | 1 | 543.5888 | 1627.745 | 3 | 30.27 | 0.0029   | SYPFKSSPLYFR   | Phospho (ST) | 0.0000001000000.0 | JC_Synth_SCX_7.2671.2671.3.dta |
| SXPFKXSPXLFGR 6 5 4 0 1309 | 1 | 491.5817 | 1471.723 | 3 | 32.32 | 0.0018   | SSPFKLSPLGFR   | Phospho (ST) | 0.0000001000000.0 | JC_Synth_SCX_7.2909.2909.3.dta |
| SXPFKXSPXLFGR 3 8 4 0 769  | 1 | 759.8793 | 1517.744 | 2 | 29.39 | 0.0012   | SSPFKVSPLGFR   | Phospho (ST) | 0.0000001000000.0 | JC_Synth_SCX_7.3047.3047.2.dta |
| GPSGXVSAQQLXR 8 0 2 0 1605 | 1 | 675.8247 | 1349.635 | 2 | 40.85 | 0.00032  | GPSGVVSAQQLR   | Phospho (ST) | 0.0000001000000.0 | JC_Synth_SCX_3.4867.4867.2.dta |
| GPSGXVSAQQLXR 5 1 0 0 1021 | 1 | 675.8247 | 1349.635 | 2 | 33.46 | 0.0018   | GPSGLVSAQQLR   | Phospho (ST) | 0.0000001000000.0 | JC_Synth_SCX_3.5007.5007.2.dta |
| GPSGXVSAQQLXR 9 3 9 0 1879 | 1 | 762.8482 | 1523.682 | 2 | 31.36 | 0.0044   | GPSGVVSAQQLYR  | Phospho (ST) | 0.0000001000000.0 | JC_Synth_SCX_3.5646.5646.2.dta |
| GPSGXVSAQQLXR 9 4 7 0 1895 | 1 | 686.8169 | 1371.619 | 2 | 46.53 | 0.00012  | GPSGVVSAQQLTR  | Phospho (ST) | 0.0000001000000.0 | JC_Synth_SCX_7.2006.2006.2.dta |
| SXPFKXSPXLFGR 0 2 9 1 60   | 1 | 775.8686 | 1549.723 | 2 | 26.62 | 0.014    | SAPFKESPLYFGK  | Phospho (ST) | 0.0000001000000.0 | JC_Synth_SCX_6.2460.2460.2.dta |
| SXPFKXSPXLFGR 0 9 2 0 185  | 1 | 526.9169 | 1577.729 | 3 | 59.13 | 7.90E-06 | SAPFKYSPLFGR   | Phospho (ST) | 0.0000001000000.0 | JC_Synth_SCX_6.2669.2669.3.dta |
| SXPFKXSPXLFGR 2 5 2 0 505  | 1 | 529.5923 | 1585.755 | 3 | 63.2  | 1.50E-06 | SEPFKLSPLFGR   | Phospho (ST) | 0.0000001000000.0 | JC_Synth_SCX_6.2928.2928.3.dta |
| GPSGXVSAQQLXR 5 6 9 0 1139 | 1 | 707.8403 | 1413.666 | 2 | 43.4  | 0.00019  | GPSGVVSAQQLYR  | Phospho (ST) | 0.0000001000000.0 | JC_Synth_SCX_6.2594.2594.2.dta |
| SXPFKXSPXLFGR 0 6 0 1 122  | 1 | 472.9026 | 1415.686 | 3 | 62.09 | 5.80E-06 | SAPFKSSPLAFLGK | Phospho (ST) | 0.0000001000000.0 | JC_Synth_SCX_6.2323.2323.3.dta |
| SXPFKXSPXLFGR 4 5 4 0 909  | 1 | 721.8636 | 1441.713 | 2 | 28.76 | 0.0086   | SGPFKLSPLGFR   | Phospho (ST) | 0.0000001000000.0 | JC_Synth_SCX_8.2893.2893.2.dta |
| GPSGXVSAQQLXR 3 8 3 0 767  | 1 | 722.8533 | 1443.692 | 2 | 62.35 | 2.20E-06 | GPSGVVSAQQLFR  | Phospho (ST) | 0.0000001000000.0 | JC_Synth_SCX_3.3633.3633.2.dta |
| GPSGXVSAQQLXR 0 0 1 0 3    | 1 | 654.8011 | 1307.588 | 2 | 53.8  | 2.30E-05 | GPSGAVSAAQLDR  | Phospho (ST) | 0.0000001000000.0 | JC_Synth_SCX_9.2066.2066.2.dta |
| SXPFKXSPXLFGR 6 5 6 0 1313 | 1 | 751.8742 | 1501.734 | 2 | 54.11 | 5.80E-06 | SSPFKLSPLSFR   | Phospho (ST) | 0.0000001000000.0 | JC_Synth_SCX_7.2919.2919.2.dta |
| SXPFKXSPXLFGR 4 6 9 0 939  | 1 | 761.8585 | 1521.703 | 2 | 42.39 | 0.00021  | SGPFKYSPLYFR   | Phospho (ST) | 0.0000001000000.0 | JC_Synth_SCX_6.2493.2493.2.dta |
| SXPFKXSPXLFGR 4 9 6 0 993  | 1 | 508.2415 | 1521.703 | 3 | 24.22 | 0.014    | SGPFKYSPLSFR   | Phospho (ST) | 0.0000001000000.0 | JC_Synth_SCX_8.2500.2500.3.dta |
| GPSGXVSAQQLXR 9 3 9 0 1879 | 1 | 762.8481 | 1523.682 | 2 | 32.34 | 0.0003   | GPSGVVSAQQLYR  | Phospho (ST) | 0.0000001000000.0 | JC_Synth_SCX_3.5319.5319.2.dta |
| SXPFKXSPXLFGR 0 6 9 0 139  | 1 | 768.8663 | 1535.718 | 2 | 45.93 | 0.00012  | SAPFKSSPLYFR   | Phospho (ST) | 0.0000001000000.0 | JC_Synth_SCX_6.2468.2468.2.dta |
| SXPFKXSPXLFGR 0 4 4 1 90   | 1 | 458.2271 | 1371.66  | 3 | 61.81 | 2.50E-06 | SAPFKGSPLEFR   | Phospho (ST) | 0.0000001000000.0 | JC_Synth_SCX_6.2320.2320.3.dta |
| SXPFKXSPXLFGR 9 6 1 0 1923 | 1 | 527.5766 | 1579.708 | 3 | 48.57 | 7.70E-05 | SYPFKSSPLDFGR  | Phospho (ST) | 0.0000001000000.0 | JC_Synth_SCX_6.2634.2634.3.dta |
| SXPFKXSPXLFGR 2 1 2 0 425  | 1 | 530.2399 | 1587.698 | 3 | 64.12 | 1.50E-06 | SEPFKDSPLFGR   | Phospho (ST) | 0.0000001000000.0 | JC_Synth_SCX_6.2502.2502.3.dta |
| SXPFKXSPXLFGR 6 6 4 1 1330 | 1 | 473.5623 | 1417.665 | 3 | 38.05 | 0.00094  | SSPFKSSPLGFR   | Phospho (ST) | 0.0000001000000.0 | JC_Synth_SCX_7.2383.2383.3.dta |
| SXPFKXSPXLFGR 1 6 1 0 1223 | 1 | 511.5645 | 1531.672 | 3 | 47.41 | 0.0001   | SSPFKSSPLDFGR  | Phospho (ST) | 0.0000001000000.0 | JC_Synth_SCX_6.2565.2565.3.dta |
| SXPFKXSPXLFGR 9 7 4 0 1949 | 1 | 768.8663 | 1535.718 | 2 | 28.39 | 0.007    | SYPFKTSPLGFR   | Phospho (ST) | 0.0000001000000.0 | JC_Synth_SCX_6.2611.2611.2.dta |
| SXPFKXSPXLFGR 6 6 9 0 1339 | 1 | 776.8638 | 1551.713 | 2 | 32.66 | 0.0018   | SSPFKSSPLYFR   | Phospho (ST) | 0.0000001000000.0 | JC_Synth_SCX_6.2495.2495.2.dta |
| SXPFKXSPXLFGR 4 4 4 0 889  | 1 | 462.8906 | 1385.65  | 3 | 31.71 | 0.0041   | SGPFKGSPLGFR   | Phospho (ST) | 0.0000001000000.0 | JC_Synth_SCX_8.2453.2453.3.dta |
| GPSGXVSAQQLXR 5 1 5 0 1031 | 1 | 696.8481 | 1391.682 | 2 | 37.93 | 0.00089  | GPSGLVSAQQLR   | Phospho (ST) | 0.0000001000000.0 | JC_Synth_SCX_9.2795.2795.2.dta |
| GPSGXVSAQQLXR 2 9 7 0 595  | 1 | 722.8273 | 1443.64  | 2 | 46.54 | 0.00012  | GPSGVVSAQQLTR  | Phospho (ST) | 0.0000001000000.0 | JC_Synth_SCX_2.2417.2417.2.dta |
| SXPFKXSPXLFGR 6 8 6 1 1374 | 1 | 487.5779 | 1459.712 | 3 | 23.56 | 0.015    | SSPFKVSPLSFR   | Phospho (ST) | 0.0000001000000.0 | JC_Synth_SCX_6.2694.2694.3.dta |
| SXPFKXSPXLFGR 6 5 6 0 1313 | 1 | 751.8741 | 1501.734 | 2 | 37.11 | 0.00029  | SSPFKLSPLSFR   | Phospho (ST) | 0.0000001000000.0 | JC_Synth_SCX_9.2889.2889.2.dta |
| GPSGXVSAQQLXR 8 0 5 1 1612 | 1 | 653.8422 | 1305.67  | 2 | 35.94 | 0.0011   | GPSGVVSAQQLK   | Phospho (ST) | 0.0000001000000.0 | JC_Synth_SCX_9.2757.2757.2.dta |
| SXPFKXSPXLFGR 2 1 2 0 425  | 1 | 794.8561 | 1587.698 | 2 | 32.94 | 0.002    | SEPFKDSPLFGR   | Phospho (ST) | 0.0000001000000.0 | JC_Synth_SCX_6.2501.2501.2.dta |
| GPSGXVSAQQLXR 0 2 1 1 44   | 1 | 669.8007 | 1337.587 | 2 | 30.44 | 0.0068   | GPSGAVSEAQLDK  | Phospho (ST) | 0.0000001000000.0 | JC_Synth_SCX_2.4427.4427.2.dta |
| SXPFKXSPXLFGR 8 3 9 0 1679 | 1 | 542.2692 | 1623.786 | 3 | 43.24 | 6.40E-05 | SVPFKFSPLYFR   | Phospho (ST) | 0.0000001000000.0 | JC_Synth_SCX_6.3110.3110.3.dta |
| GPSGXVSAQQLXR 0 9 7 0 195  | 1 | 693.8245 | 1385.635 | 2 | 27.35 | 0.008    | GPSGAVSVAQLTR  | Phospho (ST) | 0.0000001000000.0 | JC_Synth_SCX_7.2104.2104.2.dta |
| SXPFKXSPXLFGR 9 2 9 0 1859 | 1 | 835.8846 | 166      |   |       |          |                |              |                   |                                |

|                            |   |          |          |   |       |          |               |              |                   |                                |
|----------------------------|---|----------|----------|---|-------|----------|---------------|--------------|-------------------|--------------------------------|
| GPSGXVSAQLXR 6 9 2 0 1385  | 1 | 715.8193 | 1429.624 | 2 | 36.06 | 0.0015   | GPSGSVSYAQLER | Phospho (ST) | 0.0000001000000.0 | JC_Synth_SCX_3.2293.2293.2.dta |
| SXPFXKSPXLFGR 7 1 4 1 1430 | 1 | 487.5656 | 1459.675 | 3 | 35.77 | 0.0017   | STPFKDSPLFGFK | Phospho (ST) | 0.0000001000000.0 | JC_Synth_SCX_5.2444.2444.3.dta |
| GPSGXVSAQLXR 9 3 9 0 1879  | 1 | 762.8479 | 1523.681 | 2 | 28.5  | 0.0093   | GPSGYVFAQLYR  | Phospho (ST) | 0.0000001000000.0 | JC_Synth_SCX_3.3229.3229.2.dta |
| SXPFXKSPXLFGR 2 9 1 460    | 1 | 804.871  | 1607.728 | 2 | 41.57 | 7.00E-05 | SEPFKESPLYFGK | Phospho (ST) | 0.0000001000000.0 | JC_Synth_SCX_6.2503.2503.2.dta |
| SXPFXKSPXLFGR 4 6 0 1 922  | 1 | 468.2305 | 1401.67  | 3 | 37.96 | 0.0013   | SGPFKSSPLAFGK | Phospho (ST) | 0.0000001000000.0 | JC_Synth_SCX_6.4667.4667.3.dta |
| GPSGXVSAQLXR 9 5 6 0 1913  | 1 | 707.84   | 1413.666 | 2 | 41.62 | 0.00028  | GPSGVVSLAQLSR | Phospho (ST) | 0.0000001000000.0 | JC_Synth_SCX_5.2705.2705.2.dta |
| GPSGXVSAQLXR 9 3 1 1 1864  | 1 | 724.8266 | 1447.639 | 2 | 33.5  | 0.0027   | GPSGYVFAQLDK  | Phospho (ST) | 0.0000001000000.0 | JC_Synth_SCX_5.2694.2694.2.dta |
| SXPFXKSPXLFGR 4 9 9 0 999  | 1 | 533.585  | 1597.733 | 3 | 34.14 | 0.00064  | SGPFKYSPLYFGR | Phospho (ST) | 0.0000001000000.0 | JC_Synth_SCX_8.2778.2778.3.dta |
| GPSGXVSAQLXR 0 8 0 0 161   | 1 | 646.8216 | 1291.629 | 2 | 30.04 | 0.0019   | GPSGAVSVAQLAR | Phospho (ST) | 0.0000001000000.0 | JC_Synth_SCX_3.4543.4543.2.dta |
| GPSGXVSAQLXR 5 9 0 0 1181  | 1 | 699.8425 | 1397.671 | 2 | 65.68 | 7.30E-07 | GPSGLVSYAQLAR | Phospho (ST) | 0.0000001000000.0 | JC_Synth_SCX_9.2722.2722.2.dta |
| GPSGXVSAQLXR 9 3 4 0 1869  | 1 | 709.8269 | 1417.639 | 2 | 47.38 | 9.00E-05 | GPSGYVFAQLGR  | Phospho (ST) | 0.0000001000000.0 | JC_Synth_SCX_2.2896.2896.2.dta |
| SXPFXKSPXLFGR 0 6 9 0 139  | 1 | 512.9131 | 1535.717 | 3 | 33.02 | 0.0022   | SAPFKSSPLYFGR | Phospho (ST) | 0.0000001000000.0 | JC_Synth_SCX_6.2475.2475.3.dta |
| SXPFXKSPXLFGR 6 3 6 0 1273 | 1 | 768.866  | 1535.718 | 2 | 25.22 | 0.014    | SSPFKFSPLFGR  | Phospho (ST) | 0.0000001000000.0 | JC_Synth_SCX_7.2999.2999.2.dta |
| SXPFXKSPXLFGR 1 6 0 1 1833 | 1 | 790.8609 | 1579.707 | 2 | 27.93 | 0.0089   | SYPFKDSPLFGR  | Phospho (ST) | 0.0000001000000.0 | JC_Synth_SCX_6.2627.2627.2.dta |
| GPSGXVSAQLXR 5 3 1 0 1063  | 1 | 713.84   | 1425.665 | 2 | 53.75 | 1.50E-05 | GPSGLVFAQLDR  | Phospho (ST) | 0.0000001000000.0 | JC_Synth_SCX_4.3011.3011.2.dta |
| GPSGXVSAQLXR 0 8 3 0 167   | 1 | 684.8372 | 1367.66  | 2 | 41.73 | 0.00028  | GPSGAVSVAQLFR | Phospho (ST) | 0.0000001000000.0 | JC_Synth_SCX_2.3032.3032.2.dta |
| GPSGXVSAQLXR 2 1 6 0 433   | 1 | 691.801  | 1381.588 | 2 | 31.63 | 0.0029   | GPSGEVSDAQLSR | Phospho (ST) | 0.0000001000000.0 | JC_Synth_SCX_2.1950.1950.2.dta |
| SXPFXKSPXLFGR 0 9 2 0 185  | 1 | 789.8712 | 1577.728 | 2 | 31.26 | 0.0049   | SAPFKYSPLEFGR | Phospho (ST) | 0.0000001000000.0 | JC_Synth_SCX_6.2667.2667.3.dta |
| GPSGXVSAQLXR 9 3 3 0 1867  | 1 | 754.8503 | 1507.686 | 2 | 61.42 | 3.10E-06 | GPSGYVFAQLFR  | Phospho (ST) | 0.0000001000000.0 | JC_Synth_SCX_4.3445.3445.2.dta |
| SXPFXKSPXLFGR 4 7 2 0 945  | 1 | 501.5728 | 1501.697 | 3 | 40.21 | 0.00067  | SGPFKTSPLFGR  | Phospho (ST) | 0.0000001000000.0 | JC_Synth_SCX_6.2259.2259.3.dta |
| SXPFXKSPXLFGR 1 4 7 0 835  | 1 | 496.9009 | 1487.681 | 3 | 26.95 | 0.012    | SDPFKDSPLTFR  | Phospho (ST) | 0.0000001000000.0 | JC_Synth_SCX_7.2460.2460.3.dta |
| SXPFXKSPXLFGR 9 1 9 1 1840 | 1 | 543.5847 | 1627.732 | 3 | 22.55 | 0.0067   | SYPFKDSPLYFGK | Phospho (ST) | 0.0000001000000.0 | JC_Synth_SCX_6.4587.4587.3.dta |
| SXPFXKSPXLFGR 6 2 1 1386   | 1 | 522.9128 | 1565.717 | 3 | 73.25 | 1.60E-07 | SSPFKYSPLEFGR | Phospho (ST) | 0.0000001000000.0 | JC_Synth_SCX_6.2655.2655.3.dta |
| SXPFXKSPXLFGR 9 0 7 0 1815 | 1 | 517.5848 | 1549.733 | 3 | 40.92 | 0.00033  | SYPFKASPLTFR  | Phospho (ST) | 0.0000001000000.0 | JC_Synth_SCX_6.2619.2619.3.dta |
| SXPFXKSPXLFGR 2 6 5 0 531  | 1 | 515.5884 | 1543.743 | 3 | 39.26 | 0.00068  | SEPFKSSPLFGR  | Phospho (ST) | 0.0000001000000.0 | JC_Synth_SCX_6.2660.2660.3.dta |
| SXPFXKSPXLFGR 4 0 5 0 811  | 1 | 486.2497 | 1455.727 | 3 | 52.5  | 1.90E-05 | SGPFKASPLFGR  | Phospho (ST) | 0.0000001000000.0 | JC_Synth_SCX_9.2725.2725.3.dta |
| GPSGXVSAQLXR 3 1 6 0 633   | 1 | 700.8138 | 1399.613 | 2 | 58.44 | 8.40E-06 | GPSGFVSDAQLSR | Phospho (ST) | 0.0000001000000.0 | JC_Synth_SCX_3.2443.2443.2.dta |
| SXPFXKSPXLFGR 9 1 9 0 1839 | 1 | 828.8763 | 1655.738 | 2 | 33.82 | 0.001    | SYPFKDSPLYFGR | Phospho (ST) | 0.0000001000000.0 | JC_Synth_SCX_6.2851.2851.2.dta |
| SXPFXKSPXLFGR 1 5 8 1 318  | 1 | 757.8861 | 1513.758 | 2 | 28.93 | 0.0071   | SDPFKLSPLVFGK | Phospho (ST) | 0.0000001000000.0 | JC_Synth_SCX_6.3106.3106.2.dta |
| GPSGXVSAQLXR 9 0 1 1 1804  | 1 | 686.8106 | 1371.607 | 2 | 29.79 | 0.0072   | GPSGYVSAQLDK  | Phospho (ST) | 0.0000001000000.0 | JC_Synth_SCX_2.4776.4776.2.dta |
| SXPFXKSPXLFGR 7 6 0 1 1522 | 1 | 482.9056 | 1445.695 | 3 | 48.81 | 6.30E-05 | STPFKSSPLAFGK | Phospho (ST) | 0.0000001000000.0 | JC_Synth_SCX_6.2333.2333.3.dta |
| GPSGXVSAQLXR 9 0 9 1 1820  | 1 | 710.8287 | 1419.643 | 2 | 31.6  | 0.0049   | GPSGYVSAQLYK  | Phospho (ST) | 0.0000001000000.0 | JC_Synth_SCX_2.4778.4778.2.dta |
| SXPFXKSPXLFGR 9 1 0 1983   | 1 | 552.9199 | 1655.738 | 3 | 47.25 | 4.60E-05 | SYPFKYSPLDLFR | Phospho (ST) | 0.0000001000000.0 | JC_Synth_SCX_6.2852.2852.3.dta |
| SXPFXKSPXLFGR 6 3 3 0 1267 | 1 | 532.9249 | 1595.753 | 3 | 49.61 | 1.50E-05 | SSPFKFSPLFGR  | Phospho (ST) | 0.0000001000000.0 | JC_Synth_SCX_6.3276.3276.3.dta |
| GPSGXVSAQLXR 0 3 2 1 66    | 1 | 685.8209 | 1369.627 | 2 | 49.39 | 9.00E-05 | GPSGAVSFAQLEK | Phospho (ST) | 0.0000001000000.0 | JC_Synth_SCX_4.2682.2682.2.dta |
| GPSGXVSAQLXR 7 8 6 0 1573  | 1 | 669.824  | 1337.633 | 2 | 62.69 | 8.90E-07 | GPSGVVSAQLSR  | Phospho (ST) | 0.0000001000000.0 | JC_Synth_SCX_3.2283.2283.2.dta |
| GPSGXVSAQLXR 3 6 5 0 731   | 1 | 699.8421 | 1397.67  | 2 | 28.66 | 0.0061   | GPSGFVSSAQLLR | Phospho (ST) | 0.0000001000000.0 | JC_Synth_SCX_3.4586.4586.2.dta |
| GPSGXVSAQLXR 1 0 7 0 215   | 1 | 669.8057 | 1337.597 | 2 | 28.4  | 0.0069   | GPSGDVSAQLTR  | Phospho (ST) | 0.0000001000000.0 | JC_Synth_SCX_2.4579.4579.2.dta |
| SXPFXKSPXLFGR 6 6 1 0 1323 | 1 | 752.8448 | 1503.675 | 2 | 38.08 | 0.00054  | SSPFKSSPLDFGR | Phospho (ST) | 0.0000001000000.0 | JC_Synth_SCX_8.2515.2515.2.dta |
| SXPFXKSPXLFGR 3 4 4 0 689  | 1 | 738.855  | 1475.695 | 2 | 26.33 | 0.0077   | SFPFKGSPDFGR  | Phospho (ST) | 0.0000001000000.0 | JC_Synth_SCX_2.4772.4772.2.dta |
| SXPFXKSPXLFGR 4 5 6 1 914  | 1 | 722.865  | 1443.715 | 2 | 25.88 | 0.015    | SGPFKLSPLFGK  | Phospho (ST) | 0.0000001000000.0 | JC_Synth_SCX_8.2868.2868.2.dta |
| SXPFXKSPXLFGR 6 3 3 0 1267 | 1 | 798.8837 | 1595.753 | 2 | 30.44 | 0.0012   | SSPFKFSPLFGR  | Phospho (ST) | 0.0000001000000.0 | JC_Synth_SCX_6.3275.3275.2.dta |
| SXPFXKSPXLFGR 4 9 2 0 985  | 1 | 522.2444 | 1563.711 | 3 | 34.28 | 0.0022   | SGPFKYSPLEFGR | Phospho (ST) | 0.0000001000000.0 | JC_Synth_SCX_6.2696.2696.3.dta |
| SXPFXKSPXLFGR 6 3 2 1 1266 | 1 | 517.5809 | 1549.721 | 3 | 28.14 | 0.0091   | SSPFKFSPLFGR  | Phospho (ST) | 0.0000001000000.0 | JC_Synth_SCX_7.2968.2968.3.dta |
| SXPFXKSPXLFGR 9 2 9 0 1859 | 1 | 557.5916 | 1669.753 | 3 | 19.32 | 0.012    | SYPFKESPLYFGR | Phospho (ST) | 0.0000001000000.0 | JC_Synth_SCX_6.4526.4526.3.dta |
| GPSGXVSAQLXR 3 0 9 0 619   | 1 | 716.8342 | 1431.654 | 2 | 28.44 | 0.011    | GPSGFVSAQLYR  | Phospho (ST) | 0.0000001000000.0 | JC_Synth_SCX_3.4638.4638.2.dta |
| GPSGXVSAQLXR 2 0 5 0 411   | 1 | 682.8316 | 1363.649 | 2 | 36.29 | 0.00068  | GPSGEVSAQLLR  | Phospho (ST) | 0.0000001000000.0 | JC_Synth_SCX_9.2557.2557.2.dta |
| SXPFXKSPXLFGR 6 9 0 0 1399 | 1 | 543.5881 | 1627.742 | 3 | 27.48 | 0.0055   | SSPFKYSPLYFGR | Phospho (ST) | 0.0000001000000.0 | JC_Synth_SCX_6.2787.2787.3.dta |
| GPSGXVSAQLXR 1 3 9 0 279   | 1 | 738.829  | 1475.644 | 2 | 49.69 | 4.70E-05 | GPSGDVSAQLYR  | Phospho (ST) | 0.0000001000000.0 | JC_Synth_SCX_2.2875.2875.2.dta |
| SXPFXKSPXLFGR 4 0 7 0 815  | 1 | 482.2373 | 1443.69  | 3 | 44.57 | 0.00014  | SGPFKASPLTFR  | Phospho (ST) | 0.0000001000000.0 | JC_Synth_SCX_7.2495.2495.3.dta |
| GPSGXVSAQLXR 1 6 6 1 334   | 1 | 656.7922 | 1311.57  | 2 | 25.8  | 0.0062   | GPSGDVSAQLSK  | Phospho (ST) | 0.0000001000000.0 | JC_Synth_SCX_6.1864.1864.2.dta |
| SXPFXKSPXLFGR 6 1 2 0 1225 | 1 | 773.8499 | 1545.685 | 2 | 42.12 | 0.00024  | SSPFKDSPLFGR  | Phospho (ST) | 0.0000001000000.0 | JC_Synth_SCX_6.2491.2491.2.dta |
| GPSGXVSAQLXR 8 6 0 0 1721  | 1 | 654.8185 | 1307.622 | 2 | 40.23 | 0.00027  | GPSGVVSAQLAR  | Phospho (ST) | 0.0000001000000.0 | JC_Synth_SCX_2.6045.6045.2.dta |
| GPSGXVSAQLXR 0 1 5 0 31    | 1 | 675.8237 | 1349.633 | 2 | 36.47 | 0.00089  | GPSGEVSDAQLLR | Phospho (ST) | 0.0000001000000.0 | JC_Synth_SCX_5.3505.3505.2.dta |
| GPSGXVSAQLXR 9 6 9 0 1939  | 1 | 732.8289 | 1463.643 | 2 | 34.6  | 0.0032   | GPSGFVSSAQLYR | Phospho (ST) | 0.0000001000000.0 | JC_Synth_SCX_3.5018.5018.2.dta |
| SXPFXKSPXLFGR 4 6 7 0 935  | 1 | 487.5688 | 1459.685 | 3 | 29.51 | 0.0046   | SGPFKSSPLTFR  | Phospho (ST) | 0.0000001000000.0 | JC_Synth_SCX_6.2364.2364.3.dta |
| SXPFXKSPXLFGR 0 8 0 1 162  | 1 | 476.9139 | 1427.72  | 3 | 29.01 | 0.0051   | SAPFKSPLAFGK  | Phospho (ST) | 0.0000001000000.0 | JC_Synth_SCX_8.2866.2866.3.dta |
| SXPFXKSPXLFGR 7 9 3 0 1587 | 1 | 813.8886 | 1625.763 | 2 | 30.45 | 0.0019   | STPFKYSPLEFGR | Phospho (ST) | 0.0000001000000.0 | JC_Synth_SCX_7.2973.2973.2.dta |
| SXPFXKSPXLFGR 4 1 9 1 840  | 1 | 508.2369 | 1521.689 | 3 | 37.29 | 0.0015   | SGPFKDSPLYFGK | Phospho (ST) | 0.0000001000000.0 | JC_Synth_SCX_6.2534.2534.3.dta |
| GPSGXVSAQLXR 9 6 5 0 1931  | 1 | 707.8392 | 1413.664 | 2 | 39.81 | 0.00061  | GPSGVVSAQLLR  | Phospho (ST) | 0.0000001000000.0 | JC_Synth_SCX_9.2531.2531.2.dta |
| SXPFXKSPXLFGR 6 3 5 0 1271 | 1 | 521.5965 | 1561.768 | 3 | 64.06 | 1.40E-06 | SSPFKSPLEFGR  | Phospho (ST) | 0.0000001000000.0 | JC_Synth_SCX_6.3188.3188.3.dta |
| SXPFXKSPXLFGR 6 9 0 0 1339 | 1 | 518.2441 | 1551.711 | 3 | 26.5  | 0.0084   | SSPFKYSPLYFGR | Phospho (ST) | 0.0000001000000.0 | JC_Synth_SCX_3.2535.2535.3.dta |
| GPSGXVSAQLXR 6 5 6 0 1313  | 1 | 669.8235 | 1337.633 | 2 | 23.75 | 0.007    | GPSGSVSLAQLSR | Phospho (ST) | 0.0000001000000.0 | JC_Synth_SCX_2.4109.4109.2.dta |
| GPSGXVSAQLXR 2 4 6 0 493   | 1 | 662.7975 | 1323.581 | 2 | 25.03 | 0.012    | GPSGEVSGAQLSR | Phospho (ST) | 0.0000001000000.0 | JC_Synth_SCX_3.4294.4294.2.dta |
| GPSGXVSAQLXR 1 7 2 0 345   | 1 | 698.808  | 1395.602 | 2 | 33.97 | 0.0024   | GPSGDVSTAQLER | Phospho (ST) | 0.0000001000000.0 | JC_Synth_SCX_9.1995.1995.2.dta |
| SXPFXKSPXLFGR 0 3 2 0 65   | 1 | 521.5844 | 1561.731 | 3 | 44.82 | 0.00011  | SAPFKFSPLFGR  | Phospho (ST) | 0.0000001000000.0 | JC_Synth_SCX_6.2966.2966.3.dta |
| GPSGXVSAQLXR 3 9 9 0 799   | 1 | 762.8469 | 1523.679 | 2 | 30.45 | 0.006    | GPSGSVSYAQLYR | Phospho (ST) | 0.0000001000000.0 | JC_Synth_SCX_3.5168.5168.2.dta |
| GPSGXVSAQLXR 6 6 7 0 1335  | 1 | 442.8726 | 1325.596 | 3 | 42.22 | 0.00035  | GPSGFVSSAQLTR | Phospho (ST) | 0.0000001000000.0 | JC_Synth_SCX_6.1814.1814.3.dta |
| SXPFXKSPXLFGR 9 3 2 1 1866 | 1 | 542.9243 | 1625.751 | 3 | 31.65 | 0.00082  | SYPFKFSPLFGR  | Phospho (ST) | 0.0000001000000.0 | JC_Synth_SCX_6.3055.3055.3.dta |
| SXPFXKSPXLFGR 4 7 3 0 947  | 1 | 507.5808 | 1519.721 | 3 | 30.8  | 0.002    | SGPFKTSPLFGR  | Phospho (ST) | 0.0000001000000.0 | JC_Synth_SCX_7.2741.2741.3.dta |
| SXPFXKSPXLFGR 9 1 3 0 1827 | 1 | 547.5878 | 1639.742 | 3 | 33.89 | 0.00092  | SYPFKDSPLFGR  | Phospho (ST) | 0.0000001000000.0 | JC_Synth_SCX_7.2904.2904.3.dta |
| GPSGXVSAQLXR 3 5 6 0 713   | 1 | 699.8416 | 1397.669 | 2 | 58.13 | 6.90E-06 | GPSGFVSLAQLSR | Phospho (ST) | 0.0000001000000.0 | JC_Synth_SCX_2.3121.3121.2.dta |
| GPSGXVSAQLXR 9 4 6 0 1893  | 1 | 679.8077 | 1357.601 | 2 | 66.3  | 1.00E-06 | GPSGYVSAQLSR  | Phospho (ST) | 0.0000001000000.0 | JC_Synth_SCX_5.2129.2129.2.dta |
| GPSGXVSAQLXR 6 8 5 0 1371  | 1 | 675.8416 | 1349.669 | 2 | 53.38 | 6.90E-06 | GPSGSVSAQLLR  | Phospho (ST) | 0.0000001000000.0 | JC_Synth_SCX_2.2976.2976.2.dta |
| SXPFXKSPXLFGR 4 6 4 1 930  | 1 | 694.8332 | 1387.652 | 2 | 27.53 | 0.013    | SGPFKSSPLFGFK | Phospho (ST) | 0.0000001000000.0 | JC_Synth_SCX_8.2397.2397.2.dta |
| GPSGXVSAQLXR 6 4 1 0 1283  | 1 | 655.7895 | 1309.565 | 2 | 31.27 | 0.004    | GPSGDVSGAQLDR | Phospho (ST) | 0.0000001000000.0 | JC_Synth_SCX_3.1884.1884.2.dta |
| SXPFXKSPXLFGR 6 6 1 0 1323 | 1 | 502.2318 | 1503.674 | 3 | 51.98 | 2.20E-05 | SSPFKSSPLDFGR | Phospho (ST) | 0.0000001000000.0 | JC_Synth_SCX_7.2496.2496.3.dta |
| GPSGXVSAQLXR 2 0 7 0 415   | 1 | 676.8129 | 1351.611 | 2 | 46.86 | 8.70E-05 | GPSGEVSAQLTR  | Phospho (ST) | 0.0000001000000.0 | JC_Synth_SCX_3.2100.2100.2.dta |
| GPSGXVSAQLXR 6 1 9 0 123   |   |          |          |   |       |          |               |              |                   |                                |

|                            |   |          |          |   |       |          |               |              |                   |                                |
|----------------------------|---|----------|----------|---|-------|----------|---------------|--------------|-------------------|--------------------------------|
| GPSGXVSAQLXR 5 6 0 1121    | 1 | 661.8255 | 1321.636 | 2 | 38.28 | 0.00068  | GPSGLVSSAQLAR | Phospho (ST) | 0.0000001000000.0 | JC_Synth_SCX_2.4396.4396.2.dta |
| GPSGXVSAQLXR 1 3 6 0 273   | 1 | 700.8125 | 1399.61  | 2 | 56.26 | 1.40E-05 | GPSGDVSAQLSR  | Phospho (ST) | 0.0000001000000.0 | JC_Synth_SCX_2.2609.2609.2.dta |
| SXPFKXSPLXFGR 2 2 3 1 448  | 1 | 531.5836 | 1591.729 | 3 | 22.92 | 0.0077   | SEPFKESPLFFGK | Phospho (ST) | 0.0000001000000.0 | JC_Synth_SCX_6.2726.2726.3.dta |
| GPSGXVSAQLXR 8 6 9 0 1739  | 1 | 700.8306 | 1399.647 | 2 | 35.55 | 0.00091  | GPSGVVSSAQLYR | Phospho (ST) | 0.0000001000000.0 | JC_Synth_SCX_2.2449.2449.2.dta |
| GPSGXVSAQLXR 3 1 5 0 631   | 1 | 713.8384 | 1425.662 | 2 | 47.33 | 5.30E-05 | GPSGFVSDAQLLR | Phospho (ST) | 0.0000001000000.0 | JC_Synth_SCX_2.2970.2970.2.dta |
| GPSGXVSAQLXR 5 4 6 0 1093  | 1 | 654.8176 | 1307.621 | 2 | 25.45 | 0.0098   | GPSGLVSGAQLSR | Phospho (ST) | 0.0000001000000.0 | JC_Synth_SCX_2.4719.4719.2.dta |
| GPSGXVSAQLXR 2 0 7 0 415   | 1 | 676.8124 | 1351.61  | 2 | 41.28 | 0.00018  | GPSGEVSAQLTR  | Phospho (ST) | 0.0000001000000.0 | JC_Synth_SCX_9.2069.2069.2.dta |
| GPSGXVSAQLXR 6 8 7 0 1375  | 1 | 669.8228 | 1337.631 | 2 | 23.19 | 0.011    | GPSGVSVSAQLTR | Phospho (ST) | 0.0000001000000.0 | JC_Synth_SCX_6.2077.2077.2.dta |
| SXPFKXSPLXFGR 5 0 1 0 1003 | 1 | 505.5838 | 1513.73  | 3 | 56.69 | 1.80E-05 | SLPFKASPLDFGR | Phospho (ST) | 0.0000001000000.0 | JC_Synth_SCX_6.2816.2816.3.dta |
| SXPFKXSPLXFGR 9 6 3 0 1927 | 1 | 806.8798 | 1611.745 | 2 | 25.4  | 0.012    | SYPFKSSPLFFGR | Phospho (ST) | 0.0000001000000.0 | JC_Synth_SCX_7.2879.2879.2.dta |
| SXPFKXSPLXFGR 5 3 1 0 1063 | 1 | 530.9275 | 1589.761 | 3 | 36.85 | 0.00084  | SLPFKFSPLDFGR | Phospho (ST) | 0.0000001000000.0 | JC_Synth_SCX_6.3045.3045.3.dta |
| GPSGXVSAQLXR 9 6 9 0 1939  | 1 | 732.8278 | 1463.641 | 2 | 53.43 | 3.00E-05 | GPSGVVSSAQLYR | Phospho (ST) | 0.0000001000000.0 | JC_Synth_SCX_5.2361.2361.2.dta |
| GPSGXVSAQLXR 9 5 6 0 1913  | 1 | 707.8383 | 1413.662 | 2 | 46.99 | 8.70E-05 | GPSGVVSLAQLSR | Phospho (ST) | 0.0000001000000.0 | JC_Synth_SCX_2.2808.2808.2.dta |
| GPSGXVSAQLXR 5 4 2 0 1085  | 1 | 675.8226 | 1349.631 | 2 | 46.42 | 0.00011  | GPSGLVSGAQLSR | Phospho (ST) | 0.0000001000000.0 | JC_Synth_SCX_3.4719.4719.2.dta |
| GPSGXVSAQLXR 9 5 6 0 1913  | 1 | 707.8382 | 1413.662 | 2 | 55.33 | 1.30E-05 | GPSGVVSLAQLSR | Phospho (ST) | 0.0000001000000.0 | JC_Synth_SCX_4.2695.2695.2.dta |
| SXPFKXSPLXFGR 2 6 4 0 529  | 1 | 496.8997 | 1487.677 | 3 | 39    | 0.00047  | SEPFKSSPLGFGR | Phospho (ST) | 0.0000001000000.0 | JC_Synth_SCX_6.2379.2379.3.dta |
| GPSGXVSAQLXR 1 5 7 0 315   | 1 | 690.8278 | 1379.641 | 2 | 42.9  | 0.00027  | GPSGDVSLAQLTR | Phospho (ST) | 0.0000001000000.0 | JC_Synth_SCX_2.4742.4742.2.dta |
| SXPFKXSPLXFGR 3 9 2 0 785  | 1 | 827.8848 | 1653.755 | 2 | 26.35 | 0.0038   | SFPFKYSPLEFGR | Phospho (ST) | 0.0000001000000.0 | JC_Synth_SCX_6.2995.2995.2.dta |
| SXPFKXSPLXFGR 5 0 1 0 1003 | 1 | 757.8718 | 1513.729 | 2 | 46.89 | 0.00018  | SLPFKASPLDFGR | Phospho (ST) | 0.0000001000000.0 | JC_Synth_SCX_6.2810.2810.2.dta |
| GPSGXVSAQLXR 9 6 9 0 1939  | 1 | 732.8276 | 1463.641 | 2 | 54.59 | 2.30E-05 | GPSGVVSSAQLYR | Phospho (ST) | 0.0000001000000.0 | JC_Synth_SCX_2.2425.2425.2.dta |
| GPSGXVSAQLXR 3 8 7 0 775   | 1 | 699.8406 | 1397.667 | 2 | 56.44 | 1.20E-05 | GPSGFVSAQLLR  | Phospho (ST) | 0.0000001000000.0 | JC_Synth_SCX_2.2968.2968.2.dta |
| GPSGXVSAQLXR 6 9 5 0 1391  | 1 | 707.838  | 1413.661 | 2 | 26.41 | 0.0099   | GPSGVVSAQLLR  | Phospho (ST) | 0.0000001000000.0 | JC_Synth_SCX_9.2684.2684.2.dta |
| GPSGXVSAQLXR 9 0 9 0 1819  | 1 | 724.8301 | 1447.646 | 2 | 47.77 | 0.00013  | GPSGVVSSAQLYR | Phospho (ST) | 0.0000001000000.0 | JC_Synth_SCX_3.4774.4774.2.dta |
| SXPFKXSPLXFGR 8 0 1 0 1603 | 1 | 500.9117 | 1499.713 | 3 | 38.48 | 0.0011   | SVPFKASPLDFGR | Phospho (ST) | 0.0000001000000.0 | JC_Synth_SCX_6.2733.2733.3.dta |
| GPSGXVSAQLXR 8 2 7 0 1655  | 1 | 690.8276 | 1379.641 | 2 | 37.67 | 0.0009   | GPSGVVSAQLTR  | Phospho (ST) | 0.0000001000000.0 | JC_Synth_SCX_2.2296.2296.2.dta |
| GPSGXVSAQLXR 1 4 1 0 283   | 1 | 669.7859 | 1337.557 | 2 | 65.51 | 2.80E-07 | GPSGDVSGAQLDR | Phospho (ST) | 0.0000001000000.0 | JC_Synth_SCX_5.1979.1979.2.dta |
| SXPFKXSPLXFGR 9 3 2 1 1866 | 1 | 813.8814 | 1625.748 | 2 | 25.01 | 0.0066   | SYPFKFSPLFFGK | Phospho (ST) | 0.0000001000000.0 | JC_Synth_SCX_6.2958.2958.2.dta |
| GPSGXVSAQLXR 1 8 6 0 373   | 1 | 676.8119 | 1351.609 | 2 | 59.69 | 2.60E-06 | GPSGDVSAQLSR  | Phospho (ST) | 0.0000001000000.0 | JC_Synth_SCX_3.2252.2252.2.dta |
| GPSGXVSAQLXR 9 2 8 0 1857  | 1 | 721.8353 | 1441.656 | 2 | 52.56 | 2.50E-05 | GPSGVVSEAQLVR | Phospho (ST) | 0.0000001000000.0 | JC_Synth_SCX_2.2509.2509.2.dta |
