# Supplementary material
Source: PubMed Central journal article supplement (PMC3842852)
Supplement: ac400646m_si_006.pdf [file ac400646m_si_006.pdf]

| prot_acc      | pep_rank | pep_exp_n | pep_exp_n | pep_exp_z | pep_score | pep_expect | pep_seq       | pep_var_mod  | pep_var_mod_pos | pep_scan_title               |
|---------------|----------|-----------|-----------|-----------|-----------|------------|---------------|--------------|-----------------|------------------------------|
| SXPFKXSPLXFGF | 1        | 510.9041  | 1529.69   | 3         | 27.96     | 0.013      | SEPFKGSPLFEGF | Phospho (ST) | 0.0000001000000 | AJC_synth_45.1022.1022.3.dta |
| SXPFKXSPLXFGF | 1        | 516.2441  | 1545.71   | 3         | 25.73     | 0.0027     | SEPFKESPLTFGK | Phospho (ST) | 0.0000001000000 | AJC_synth_45.1024.1024.3.dta |
| SXPFKXSPLXFGF | 1        | 525.5758  | 1573.706  | 3         | 31.78     | 0.0011     | SEPFKESPLFEGK | Phospho (ST) | 0.0000001000000 | AJC_synth_45.1028.1028.3.dta |
| SXPFKXSPLXFGF | 1        | 491.5698  | 1471.688  | 3         | 47.18     | 9.90E-05   | SAPFKDSPLAFGR | Phospho (ST) | 0.0000001000000 | AJC_synth_45.1036.1036.3.dta |
| SXPFKXSPLXFGF | 1        | 506.9002  | 1517.679  | 3         | 55.36     | 7.40E-06   | SEPFKSSPLDFGK | Phospho (ST) | 0.0000001000000 | AJC_synth_45.1039.1039.3.dta |
| SXPFKXSPLXFGF | 1        | 498.9055  | 1493.695  | 3         | 41.84     | 0.00061    | SGPFKSSPLYFGK | Phospho (ST) | 0.0000001000000 | AJC_synth_45.1045.1045.3.dta |
| SXPFKXSPLXFGF | 1        | 520.9078  | 1559.702  | 3         | 50.7      | 4.20E-05   | SEPFKESPLFEGF | Phospho (ST) | 0.0000001000000 | AJC_synth_45.1053.1053.3.dta |
| SXPFKXSPLXFGF | 1        | 476.906   | 1427.696  | 3         | 69.5      | 7.20E-07   | SAPFKASPLAFGR | Phospho (ST) | 0.0000001000000 | AJC_synth_45.1060.1060.3.dta |
| SXPFKXSPLXFGF | 1        | 517.5808  | 1549.721  | 3         | 42.2      | 0.00036    | SAPFKESPLYFGK | Phospho (ST) | 0.0000001000000 | AJC_synth_45.1061.1061.3.dta |
| SXPFKXSPLXFGF | 1        | 530.2394  | 1587.696  | 3         | 41.16     | 0.0002     | SEPFKDSPLFEGF | Phospho (ST) | 0.0000001000000 | AJC_synth_45.1070.1070.3.dta |
| SXPFKXSPLXFGF | 1        | 496.2418  | 1485.704  | 3         | 37.47     | 0.00093    | SAPFKESPLAFGR | Phospho (ST) | 0.0000001000000 | AJC_synth_45.1085.1085.3.dta |
| SXPFKXSPLXFGF | 1        | 532.248   | 1593.722  | 3         | 29.81     | 0.00059    | SEPFKSSPLYFGR | Phospho (ST) | 0.0000001000000 | AJC_synth_45.1087.1087.3.dta |
| SXPFKXSPLXFGF | 1        | 546.2515  | 1635.733  | 3         | 42.78     | 0.00013    | SEPFKESPLYFGR | Phospho (ST) | 0.0000001000000 | AJC_synth_45.1109.1109.3.dta |
| SXPFKXSPLXFGF | 1        | 524.9198  | 1571.738  | 3         | 37.72     | 0.00081    | SEPFKESPLVFGF | Phospho (ST) | 0.0000001000000 | AJC_synth_45.1117.1117.3.dta |
| SXPFKXSPLXFGF | 1        | 527.5836  | 1579.729  | 3         | 40.14     | 0.00011    | SEPFKTSPLYFGK | Phospho (ST) | 0.0000001000000 | AJC_synth_45.1124.1124.3.dta |
| SXPFKXSPLXFGF | 1        | 502.9096  | 1505.707  | 3         | 39.65     | 0.00031    | SGPFKASPLYFGR | Phospho (ST) | 0.0000001000000 | AJC_synth_45.1140.1140.3.dta |
| SXPFKXSPLXFGF | 1        | 525.5679  | 1573.682  | 3         | 43.08     | 0.00016    | SDPFKDSPLFEGF | Phospho (ST) | 0.0000001000000 | AJC_synth_45.1148.1148.3.dta |
| SXPFKXSPLXFGF | 1        | 507.5821  | 1519.724  | 3         | 30.61     | 0.0023     | SAPFKASPLYFGR | Phospho (ST) | 0.0000001000000 | AJC_synth_45.1149.1149.3.dta |
| SXPFKXSPLXFGF | 1        | 505.5848  | 1513.733  | 3         | 38.08     | 0.00096    | SEPFKASPLVFGF | Phospho (ST) | 0.0000001000000 | AJC_synth_45.1156.1156.3.dta |
| GPSGVXSQAQLXR | 1        | 447.5497  | 1339.627  | 3         | 29.25     | 0.00059    | GPSGVSSAAQLLR | Phospho (ST) | 0.0000001000000 | AJC_synth_45.1170.1170.3.dta |
| SXPFKXSPLXFGF | 1        | 486.9182  | 1457.733  | 3         | 45.92     | 0.00014    | SLPFKSSPLAFGK | Phospho (ST) | 0.0000001000000 | AJC_synth_45.1172.1172.3.dta |
| SXPFKXSPLXFGF | 1        | 548.2566  | 1641.748  | 3         | 53.05     | 5.00E-06   | SYPFKESPLYFGK | Phospho (ST) | 0.0000001000000 | AJC_synth_45.1175.1175.3.dta |
| SXPFKXSPLXFGF | 1        | 472.2429  | 1413.707  | 3         | 39.06     | 0.00052    | SAPFKSSPLFEGK | Phospho (ST) | 0.0000001000000 | AJC_synth_45.1191.1191.3.dta |
| SXPFKXSPLXFGF | 1        | 536.92    | 1607.738  | 3         | 40.25     | 0.00041    | SYPFKTSPLFEGF | Phospho (ST) | 0.0000001000000 | AJC_synth_45.1196.1196.3.dta |
| SXPFKXSPLXFGF | 1        | 496.2505  | 1485.73   | 3         | 42.38     | 0.00024    | SLPFKDSPLAFGK | Phospho (ST) | 0.0000001000000 | AJC_synth_45.1204.1204.3.dta |
| SXPFKXSPLXFGF | 1        | 506.2322  | 1515.675  | 3         | 33.9      | 0.00029    | SDPFKASPLDFGR | Phospho (ST) | 0.0000001000000 | AJC_synth_45.1220.1220.3.dta |
| SXPFKXSPLXFGF | 1        | 510.2553  | 1527.744  | 3         | 35.73     | 0.00016    | SLPFKESPLAFGR | Phospho (ST) | 0.0000001000000 | AJC_synth_45.1221.1221.3.dta |
| SXPFKXSPLXFGF | 1        | 528.9212  | 1583.742  | 3         | 48.14     | 6.20E-05   | SYPFKASPLYFGK | Phospho (ST) | 0.0000001000000 | AJC_synth_45.1228.1228.3.dta |
| SXPFKXSPLXFGF | 1        | 482.2456  | 1443.715  | 3         | 26.88     | 0.012      | SAPFKSSPLFEGF | Phospho (ST) | 0.0000001000000 | AJC_synth_45.1229.1229.3.dta |
| SXPFKXSPLXFGF | 1        | 546.2512  | 1635.732  | 3         | 37.24     | 0.00048    | SEPFKSSPLFEGF | Phospho (ST) | 0.0000001000000 | AJC_synth_45.1230.1230.3.dta |
| SXPFKXSPLXFGF | 1        | 522.2444  | 1563.711  | 3         | 30.83     | 0.00048    | SGPFKESPLYFGR | Phospho (ST) | 0.0000001000000 | AJC_synth_45.1236.1236.3.dta |
| SXPFKXSPLXFGF | 1        | 515.5851  | 1543.733  | 3         | 40.64     | 0.00028    | SEPFKSSPLFEGK | Phospho (ST) | 0.0000001000000 | AJC_synth_45.1244.1244.3.dta |
| SXPFKXSPLXFGF | 1        | 481.5769  | 1441.709  | 3         | 58.56     | 8.70E-06   | SGPFKVSPLAFGR | Phospho (ST) | 0.0000001000000 | AJC_synth_45.1245.1245.3.dta |
| SXPFKXSPLXFGF | 1        | 518.2408  | 1551.701  | 3         | 30.05     | 0.0033     | SSPFKYSPLDFGK | Phospho (ST) | 0.0000001000000 | AJC_synth_45.1252.1252.3.dta |
| SXPFKXSPLXFGF | 1        | 502.9193  | 1505.736  | 3         | 42.07     | 0.00029    | SGPFKSSPLVFGK | Phospho (ST) | 0.0000001000000 | AJC_synth_45.1268.1268.3.dta |
| SXPFKXSPLXFGF | 1        | 490.9214  | 1469.742  | 3         | 26.75     | 0.0022     | SAPFKASPLAFGR | Phospho (ST) | 0.0000001000000 | AJC_synth_45.1278.1278.3.dta |
| SXPFKXSPLXFGF | 1        | 488.243   | 1461.707  | 3         | 41.9      | 0.00011    | SGPFKASPLFFGK | Phospho (ST) | 0.0000001000000 | AJC_synth_45.1279.1279.3.dta |
| SXPFKXSPLXFGF | 1        | 507.5913  | 1519.752  | 3         | 43.1      | 0.00021    | SAPFKSSPLYFGK | Phospho (ST) | 0.0000001000000 | AJC_synth_45.1284.1284.3.dta |
| SXPFKXSPLXFGF | 1        | 548.2573  | 1641.75   | 3         | 28.39     | 0.00014    | SYPFKSSPLFEGF | Phospho (ST) | 0.0000001000000 | AJC_synth_45.1293.1293.3.dta |
| SXPFKXSPLXFGF | 1        | 541.5798  | 1621.718  | 3         | 26.7      | 0.00068    | SDPFKYSPLFEGF | Phospho (ST) | 0.0000001000000 | AJC_synth_45.1309.1309.3.dta |
| SXPFKXSPLXFGF | 1        | 531.588   | 1591.742  | 3         | 32.13     | 0.0034     | SVPFKYSPLDFGR | Phospho (ST) | 0.0000001000000 | AJC_synth_45.1325.1325.3.dta |
| SXPFKXSPLXFGF | 1        | 536.2609  | 1605.761  | 3         | 53.33     | 2.20E-05   | SEPFKSSPLYFGK | Phospho (ST) | 0.0000001000000 | AJC_synth_45.1326.1326.3.dta |
| SXPFKXSPLXFGF | 1        | 543.5841  | 1627.731  | 3         | 43.67     | 4.30E-05   | SYPFKDSPLYFGK | Phospho (ST) | 0.0000001000000 | AJC_synth_45.1332.1332.3.dta |
| SXPFKXSPLXFGF | 1        | 559.5967  | 1675.768  | 3         | 40.73     | 0.00015    | SYPFKSSPLYFGK | Phospho (ST) | 0.0000001000000 | AJC_synth_45.1333.1333.3.dta |
| SXPFKXSPLXFGF | 1        | 547.6003  | 1639.779  | 3         | 40.32     | 9.30E-05   | SVPFKSSPLYFGR | Phospho (ST) | 0.0000001000000 | AJC_synth_45.1334.1334.3.dta |
| SXPFKXSPLXFGF | 1        | 506.2435  | 1515.709  | 3         | 36.74     | 0.00007    | SDPFKVSPLSFGF | Phospho (ST) | 0.0000001000000 | AJC_synth_45.1342.1342.3.dta |
| SXPFKXSPLXFGF | 1        | 486.9182  | 1457.733  | 3         | 37.04     | 0.00011    | SAPFKSSPLSFGK | Phospho (ST) | 0.0000001000000 | AJC_synth_45.1345.1345.3.dta |
| SXPFKXSPLXFGF | 1        | 482.2455  | 1443.715  | 3         | 34.09     | 0.0026     | SGPFKLSPLSFGK | Phospho (ST) | 0.0000001000000 | AJC_synth_45.1348.1348.3.dta |
| SXPFKXSPLXFGF | 1        | 552.9193  | 1655.736  | 3         | 50.8      | 2.00E-05   | SYPFKYSPLDFGK | Phospho (ST) | 0.0000001000000 | AJC_synth_45.1354.1354.3.dta |
| SXPFKXSPLXFGF | 1        | 517.5938  | 1549.759  | 3         | 37.05     | 0.00083    | SLPFKSSPLFFGK | Phospho (ST) | 0.0000001000000 | AJC_synth_45.1356.1356.3.dta |
| SXPFKXSPLXFGF | 1        | 496.2503  | 1485.729  | 3         | 46.78     | 0.00014    | SGPFKLSPLFEGK | Phospho (ST) | 0.0000001000000 | AJC_synth_45.1357.1357.3.dta |
| SXPFKXSPLXFGF | 1        | 568.932   | 1703.774  | 3         | 25.87     | 0.0026     | SYPFKYSPLYFGR | Phospho (ST) | 0.0000001000000 | AJC_synth_45.1360.1360.3.dta |
| SXPFKXSPLXFGF | 1        | 492.2486  | 1473.724  | 3         | 29.98     | 0.0048     | STPFKVSPLSFGK | Phospho (ST) | 0.0000001000000 | AJC_synth_45.1364.1364.3.dta |
| SXPFKXSPLXFGF | 1        | 538.2668  | 1611.779  | 3         | 46.79     | 2.20E-05   | SYPFKSSPLYFGK | Phospho (ST) | 0.0000001000000 | AJC_synth_45.1380.1380.3.dta |
| SXPFKXSPLXFGF | 1        | 526.2545  | 1575.742  | 3         | 32.82     | 0.00016    | SDPFKSSPLDFGR | Phospho (ST) | 0.0000001000000 | AJC_synth_45.1383.1383.3.dta |
| SXPFKXSPLXFGF | 1        | 523.5894  | 1567.746  | 3         | 46.25     | 6.30E-05   | SAPFKSSPLFFGK | Phospho (ST) | 0.0000001000000 | AJC_synth_45.1388.1388.3.dta |
| SXPFKXSPLXFGF | 1        | 510.2559  | 1527.746  | 3         | 37.96     | 0.00098    | SAPFKSSPLFEGF | Phospho (ST) | 0.0000001000000 | AJC_synth_45.1389.1389.3.dta |
| SXPFKXSPLXFGF | 1        | 540.9318  | 1619.774  | 3         | 31.14     | 0.0025     | SLPFKYSPLFEGF | Phospho (ST) | 0.0000001000000 | AJC_synth_45.1390.1390.3.dta |
| SXPFKXSPLXFGF | 1        | 515.5886  | 1543.744  | 3         | 53.5      | 2.50E-05   | SSPFKSSPLFEGF | Phospho (ST) | 0.0000001000000 | AJC_synth_45.1396.1396.3.dta |
| SXPFKXSPLXFGF | 1        | 505.5848  | 1513.733  | 3         | 56.01     | 1.60E-05   | SGPFKLSPLFEGF | Phospho (ST) | 0.0000001000000 | AJC_synth_45.1397.1397.3.dta |
| SXPFKXSPLXFGF | 1        | 483.5707  | 1447.69   | 3         | 38.09     | 0.00023    | SGPFKSSPLFEGK | Phospho (ST) | 0.0000001000000 | AJC_synth_45.1399.1399.3.dta |
| SXPFKXSPLXFGF | 1        | 533.5931  | 1597.758  | 3         | 45.32     | 7.20E-05   | STPFKSSPLFFGK | Phospho (ST) | 0.0000001000000 | AJC_synth_45.1404.1404.3.dta |
| GPSGVXSQAQLXR | 1        | 445.5653  | 1333.674  | 3         | 41.59     | 9.40E-05   | GPSGVSSAAQLLR | Phospho (ST) | 0.0000001000000 | AJC_synth_45.1406.1406.3.dta |
| SXPFKXSPLXFGF | 1        | 512.2623  | 1533.765  | 3         | 41.26     | 0.00032    | SAPFKSSPLYFGK | Phospho (ST) | 0.0000001000000 | AJC_synth_45.1412.1412.3.dta |
| SXPFKXSPLXFGF | 1        | 493.5729  | 1477.697  | 3         | 36.52     | 0.00015    | SAPFKYSPLFEGK | Phospho (ST) | 0.0000001000000 | AJC_synth_45.1414.1414.3.dta |
| SXPFKXSPLXFGF | 1        | 518.9176  | 1553.731  | 3         | 52.47     | 2.20E-05   | SGPFKYSPLFFGK | Phospho (ST) | 0.0000001000000 | AJC_synth_45.1415.1415.3.dta |
| SXPFKXSPLXFGF | 1        | 521.5932  | 1561.758  | 3         | 31.05     | 0.0032     | SLPFKDSPLFFGK | Phospho (ST) | 0.0000001000000 | AJC_synth_45.1416.1416.3.dta |
| SXPFKXSPLXFGF | 1        | 516.9108  | 1547.711  | 3         | 39.83     | 0.00045    | SGPFKSSPLFEGF | Phospho (ST) | 0.0000001000000 | AJC_synth_45.1444.1444.3.dta |
| SXPFKXSPLXFGF | 1        | 504.9379  | 1511.792  | 3         | 33.17     | 0.00048    | SLPFKSSPLFFGK | Phospho (ST) | 0.0000001000000 | AJC_synth_45.1445.1445.3.dta |
| SXPFKXSPLXFGF | 1        | 531.5834  | 1591.728  | 3         | 26.89     | 0.0031     | SEPFKSSPLFEGK | Phospho (ST) | 0.0000001000000 | AJC_synth_45.1446.1446.3.dta |
| GPSGVXSQAQLXR | 1        | 476.2414  | 1425.702  | 3         | 50.53     | 1.90E-05   | GPSGLVSSAQLVR | Phospho (ST) | 0.0000001000000 | AJC_synth_45.1447.1447.3.dta |
| SXPFKXSPLXFGF | 1        | 526.93    | 1577.768  | 3         | 42.46     | 0.00015    | SSPFKLSPLYFGR | Phospho (ST) | 0.0000001000000 | AJC_synth_45.1460.1460.3.dta |
| SXPFKXSPLXFGF | 1        | 495.5934  | 1483.758  | 3         | 52.9      | 6.90E-06   | SGPFKSSPLVFGF | Phospho (ST) | 0.0000001000000 | AJC_synth_45.1469.1469.3.dta |
| SXPFKXSPLXFGF | 1        | 502.9059  | 1505.696  | 3         | 44.09     | 0.00016    | SDPFKSSPLDFGK | Phospho (ST) | 0.0000001000000 | AJC_synth_45.1470.1470.3.dta |
| SXPFKXSPLXFGF | 1        | 536.26    | 1605.758  | 3         | 32.29     | 0.0003     | SDPFKSSPLFGR  | Phospho (ST) | 0.0000001000000 | AJC_synth_45.1471.1471.3.dta |
| SXPFKXSPLXFGF | 1        | 528.9216  | 1583.743  | 3         | 46.84     | 9.00E-05   | SSPFKSSPLYFGK | Phospho (ST) | 0.0000001000000 | AJC_synth_45.1476.1476.3.dta |
| SXPFKXSPLXFGF | 1        | 554.2648  | 1659.773  | 3         | 35.24     | 0.00072    | SYPFKSSPLFFGK | Phospho (ST) | 0.0000001000000 | AJC_synth_45.1484.1484.3.dta |
| SXPFKXSPLXFGF | 1        | 497.5867  | 1489.738  | 3         | 40.61     | 0.00013    | SGPFKSSPLYFGR | Phospho (ST) | 0.0000001000000 | AJC_synth_45.                |

|                             |   |          |          |   |       |          |                |              |                   |                                   |
|-----------------------------|---|----------|----------|---|-------|----------|----------------|--------------|-------------------|-----------------------------------|
| SXPFKXSPLXFGR 3 5 5 1 792   | 1 | 537.6068 | 1609.798 | 3 | 21.58 | 0.0073   | SFPFKYSPLLFGK  | Phospho (ST) | 0.0000001000000.0 | AJC_synth_45.1620.1620.3.dta      |
| GPSGVXSQAQLXR 5 9 5 0 1191  | 1 | 480.9127 | 1439.716 | 3 | 70.35 | 1.40E-07 | GPSGLVSAQQLR   | Phospho (ST) | 0.0000001000000.0 | AJC_synth_45.1628.1628.3.dta      |
| SXPFKXSPLXFGR 3 5 0 0 701   | 1 | 516.2655 | 1545.775 | 3 | 36.13 | 0.00024  | SFPFKLSPLAFGR  | Phospho (ST) | 0.0000001000000.0 | AJC_synth_45.1636.1636.3.dta      |
| SXPFKXSPLXFGR 3 5 2 1 706   | 1 | 526.2659 | 1575.776 | 3 | 30.54 | 0.00022  | SFPFKSPLFEGK   | Phospho (ST) | 0.0000001000000.0 | AJC_synth_45.1637.1637.3.dta      |
| SXPFKXSPLXFGR 5 3 1 1 1064  | 1 | 521.5952 | 1561.764 | 3 | 32.42 | 0.00036  | SLPFKSPDLFGK   | Phospho (ST) | 0.0000001000000.0 | AJC_synth_45.1638.1638.3.dta      |
| GPSGVXSQAQLXR 5 3 9 0 1079  | 1 | 492.2412 | 1473.702 | 3 | 42.99 | 0.00022  | GPSGVVSAQLYR   | Phospho (ST) | 0.0000001000000.0 | AJC_synth_45.1644.1644.3.dta      |
| GPSGVXSQAQLXR 9 8 3 0 1967  | 1 | 487.5676 | 1459.681 | 3 | 33.81 | 0.00034  | GPSGVVSAQFLR   | Phospho (ST) | 0.0000001000000.0 | AJC_synth_45.1647.1647.3.dta      |
| SXPFKXSPLXFGR 5 8 3 0 1167  | 1 | 525.6093 | 1573.806 | 3 | 36.51 | 0.00022  | SFPFKVSPFLFGR  | Phospho (ST) | 0.0000001000000.0 | AJC_synth_45.1668.1668.3.dta      |
| GPSGVXSQAQLXR 3 5 8 3 1 718 | 1 | 461.5745 | 1381.702 | 3 | 42.68 | 0.00029  | GPSGVVSAQQLVK  | Phospho (ST) | 0.0000001000000.0 | AJC_synth_45.1679.1679.3.dta      |
| GPSGVXSQAQLXR 0 5 3 1 108   | 1 | 452.2304 | 1353.669 | 3 | 29.32 | 0.00079  | GPSGAVSLAQLFK  | Phospho (ST) | 0.0000001000000.0 | AJC_synth_45.1680.1680.3.dta      |
| SXPFKXSPLXFGR 3 3 0 0 661   | 1 | 527.5918 | 1579.754 | 3 | 45.64 | 3.40E-05 | SFPFKVSPFLAFGR | Phospho (ST) | 0.0000001000000.0 | AJC_synth_45.1684.1684.3.dta      |
| SXPFKXSPLXFGR 1 5 5 1 312   | 1 | 510.265  | 1527.773 | 3 | 38.75 | 0.00058  | SDFPKSPLFLFGK  | Phospho (ST) | 0.0000001000000.0 | AJC_synth_45.1692.1692.3.dta      |
| SXPFKXSPLXFGR 3 1 3 1 628   | 1 | 532.9224 | 1595.745 | 3 | 31.6  | 0.0011   | SFPFKDSPLFEGK  | Phospho (ST) | 0.0000001000000.0 | AJC_synth_45.1708.1708.3.dta      |
| SXPFKXSPLXFGR 3 5 9 0 719   | 1 | 546.942  | 1637.804 | 3 | 21.41 | 0.00098  | SFPFKSPLVFGK   | Phospho (ST) | 0.0000001000000.0 | AJC_synth_45.1724.1724.3.dta      |
| SXPFKXSPLXFGR 5 5 5 1 1112  | 1 | 509.6181 | 1525.832 | 3 | 37.91 | 0.00016  | SLPFKSPLLFGK   | Phospho (ST) | 0.0000001000000.0 | AJC_synth_45.1735.1735.3.dta      |
| SXPFKXSPLXFGR 1 3 3 0 267   | 1 | 542.2572 | 1623.75  | 3 | 40.99 | 8.40E-05 | SDFPKVSPFLFGR  | Phospho (ST) | 0.0000001000000.0 | AJC_synth_45.1740.1740.3.dta      |
| GPSGVXSQAQLXR 3 9 3 0 787   | 1 | 503.5695 | 1507.687 | 3 | 29.34 | 0.00047  | GPSGVVSAQFLR   | Phospho (ST) | 0.0000001000000.0 | AJC_synth_45.1743.1743.3.dta      |
| SXPFKXSPLXFGR 3 8 3 0 767   | 1 | 536.9368 | 1607.789 | 3 | 35.77 | 0.00036  | SFPFKVSPFLFGR  | Phospho (ST) | 0.0000001000000.0 | AJC_synth_45.1748.1748.3.dta      |
| SXPFKXSPLXFGR 5 5 5 0 1111  | 1 | 518.9541 | 1553.841 | 3 | 24.91 | 0.00044  | SLPFKSPLLFGK   | Phospho (ST) | 0.0000001000000.0 | AJC_synth_45.1764.1764.3.dta      |
| SXPFKXSPLXFGR 5 3 3 1 1068  | 1 | 532.2745 | 1593.802 | 3 | 25.9  | 0.00042  | SLPFKSPFLFEGK  | Phospho (ST) | 0.0000001000000.0 | AJC_synth_45.1780.1780.3.dta      |
| GPSGVXSQAQLXR 9 5 3 1 1908  | 1 | 482.9063 | 1445.697 | 3 | 26.66 | 0.012    | GPSGVVSAQFLK   | Phospho (ST) | 0.0000001000000.0 | AJC_synth_45.1788.1788.3.dta      |
| SXPFKXSPLXFGR 9 7 3 0 1947  | 1 | 542.9304 | 1625.769 | 3 | 26.5  | 0.004    | SFPFKTSPLFGR   | Phospho (ST) | 0.0000001000000.0 | AJC_synth_45.1796.1796.3.dta      |
| SXPFKXSPLXFGR 5 3 3 0 1067  | 1 | 541.6105 | 1621.81  | 3 | 21.52 | 0.0085   | SLPFKSPFLFGR   | Phospho (ST) | 0.0000001000000.0 | AJC_synth_45.1804.1804.3.dta      |
| GPSGVXSQAQLXR 5 8 3 0 1167  | 1 | 470.9101 | 1409.708 | 3 | 45.92 | 3.10E-05 | GPSGLVSAQQLR   | Phospho (ST) | 0.0000001000000.0 | AJC_synth_45.1812.1812.3.dta      |
| GPSGVXSQAQLXR 8 5 3 1 1708  | 1 | 461.5757 | 1381.705 | 3 | 28.51 | 0.00051  | GPSGVVSAQLFK   | Phospho (ST) | 0.0000001000000.0 | AJC_synth_45.1821.1821.3.dta      |
| GPSGVXSQAQLXR 3 8 3 0 767   | 1 | 482.2383 | 1443.693 | 3 | 28.69 | 0.00056  | GPSGVVSAQFLR   | Phospho (ST) | 0.0000001000000.0 | AJC_synth_45.1829.1829.3.dta      |
| GPSGVXSQAQLXR 5 3 5 1 1072  | 1 | 466.2473 | 1395.72  | 3 | 43.94 | 9.50E-05 | GPSGLVSAQQLK   | Phospho (ST) | 0.0000001000000.0 | AJC_synth_45.1854.1854.3.dta      |
| SXPFKXSPLXFGR 3 3 3 0 667   | 1 | 552.9387 | 1655.794 | 3 | 27.16 | 0.00019  | SFPFKVSPFLFGR  | Phospho (ST) | 0.0000001000000.0 | AJC_synth_45.1860.1860.3.dta      |
| GPSGVXSQAQLXR 5 5 5 1 1112  | 1 | 454.9181 | 1361.733 | 3 | 33.97 | 0.00009  | GPSGLVSAQLK    | Phospho (ST) | 0.0000001000000.0 | AJC_synth_45.1872.1872.3.dta      |
| GPSGVXSQAQLXR 5 3 5 0 1071  | 1 | 475.5826 | 1423.726 | 3 | 46.6  | 2.20E-05 | GPSGLVSAQQLR   | Phospho (ST) | 0.0000001000000.0 | AJC_synth_45.1876.1876.3.dta      |
| GPSGVXSQAQLXR 3 3 5 0 671   | 1 | 486.9109 | 1457.711 | 3 | 36.56 | 0.00056  | GPSGVVSAQQLR   | Phospho (ST) | 0.0000001000000.0 | AJC_synth_45.1892.1892.3.dta      |
| GPSGVXSQAQLXR 5 3 3 1 1108  | 1 | 466.2481 | 1395.723 | 3 | 29.09 | 0.00022  | GPSGLVSAQLFK   | Phospho (ST) | 0.0000001000000.0 | AJC_synth_45.1948.1948.3.dta      |
| GPSGVXSQAQLXR 5 3 3 0 1107  | 1 | 475.5836 | 1423.729 | 3 | 28.97 | 0.00027  | GPSGLVSAQLFR   | Phospho (ST) | 0.0000001000000.0 | AJC_synth_45.1972.1972.3.dta      |
| GPSGVXSQAQLXR 1 0 7 0 215   | 1 | 446.8741 | 1337.601 | 3 | 29.49 | 0.00054  | GPSGDVSAQQLTR  | Phospho (ST) | 0.0000001000000.0 | AJC_synth_45.765.765.3.dta        |
| GPSGVXSQAQLXR 0 0 0 0 1     | 1 | 422.2076 | 1263.601 | 3 | 24.17 | 0.00038  | GPSGAVSAQQLR   | Phospho (ST) | 0.0000001000000.0 | AJC_synth_45.839.839.3.dta        |
| GPSGVXSQAQLXR 1 1 9 0 239   | 1 | 482.2102 | 1443.609 | 3 | 28.04 | 0.00069  | GPSGDVSAQQLR   | Phospho (ST) | 0.0000001000000.0 | AJC_synth_45.878.878.3.dta        |
| GPSGVXSQAQLXR 0 1 9 0 39    | 1 | 467.5471 | 1399.62  | 3 | 32.59 | 0.00033  | GPSGAVSDAQLR   | Phospho (ST) | 0.0000001000000.0 | AJC_synth_45.892.892.3.dta        |
| GPSGVXSQAQLXR 9 2 0 0 1841  | 1 | 472.2191 | 1413.636 | 3 | 33    | 0.00035  | GPSGVVSEAQLR   | Phospho (ST) | 0.0000001000000.0 | AJC_synth_45.933.933.3.dta        |
| SXPFKXSPLXFGR 0 6 2 1 126   | 1 | 492.2375 | 1473.691 | 3 | 56.44 | 1.70E-05 | SAPFKSPLFEGK   | Phospho (ST) | 0.0000001000000.0 | AJC_synth_45.973.973.3.dta        |
| GPSGVXSQAQLXR 0 8 0 0 161   | 1 | 431.5502 | 1291.629 | 3 | 39.28 | 0.00023  | GPSGAVSAQQLR   | Phospho (ST) | 0.0000001000000.0 | AJC_synth_45.974.974.3.dta        |
| SXPFKXSPLXFGR 6 6 0 1 1322  | 1 | 478.2337 | 1431.679 | 3 | 39.68 | 0.00057  | SFPFKSPLAFGK   | Phospho (ST) | 0.0000001000000.0 | AJC_synth_45.975.975.3.dta        |
| SXPFKXSPLXFGR 2 4 2 1 486   | 1 | 501.569  | 1501.685 | 3 | 39.69 | 0.00059  | SFPFKSPLFEGK   | Phospho (ST) | 0.0000001000000.0 | AJC_synth_45.996.996.3.dta        |
| SXPFKXSPLXFGR 2 6 2 1 526   | 1 | 511.5725 | 1531.696 | 3 | 51.54 | 9.50E-06 | SFPFKSPLFEGK   | Phospho (ST) | 0.0000001000000.0 | AJC_synth_45.997.997.3.dta        |
| GPSGVXSQAQLXR 8 1 4 0 1629  | 1 | 661.8077 | 1321.601 | 2 | 23.61 | 0.011    | GPSGVVSDAQLGR  | Phospho (ST) | 0.0000001000000.0 | AJC_synth_test_25.1001.1001.2.dta |
| GPSGVXSQAQLXR 8 0 4 0 1609  | 1 | 639.8156 | 1277.617 | 2 | 51.37 | 9.80E-06 | GPSGVVSAQQLR   | Phospho (ST) | 0.0000001000000.0 | AJC_synth_test_25.1007.1007.2.dta |
| GPSGVXSQAQLXR 0 8 1 0 163   | 1 | 668.8179 | 1335.621 | 2 | 38.65 | 0.00051  | GPSGAVSAQLDR   | Phospho (ST) | 0.0000001000000.0 | AJC_synth_test_25.1015.1015.2.dta |
| GPSGVXSQAQLXR 0 8 6 1 174   | 1 | 640.8176 | 1279.621 | 2 | 22.51 | 0.02     | GPSGAVSAQLSK   | Phospho (ST) | 0.0000001000000.0 | AJC_synth_test_25.1023.1023.2.dta |
| SXPFKXSPLXFGR 0 6 4 1 130   | 1 | 701.843  | 1401.672 | 2 | 21.55 | 0.044    | SAPFKSPLFEGK   | Phospho (ST) | 0.0000001000000.0 | AJC_synth_test_25.1031.1031.2.dta |
| SXPFKXSPLXFGR 7 6 4 1 1530  | 1 | 716.8486 | 1431.683 | 2 | 21.82 | 0.035    | SFPFKSPLFEGK   | Phospho (ST) | 0.0000001000000.0 | AJC_synth_test_25.1039.1039.2.dta |
| GPSGVXSQAQLXR 5 6 1 0 1123  | 1 | 683.8219 | 1365.629 | 2 | 40.31 | 0.00042  | GPSGLVSAQQLDR  | Phospho (ST) | 0.0000001000000.0 | AJC_synth_test_25.1063.1063.2.dta |
| GPSGVXSQAQLXR 3 4 6 0 693   | 1 | 717.8096 | 1341.605 | 2 | 30    | 0.00044  | GPSGVVSAQQLSR  | Phospho (ST) | 0.0000001000000.0 | AJC_synth_test_25.1064.1064.2.dta |
| GPSGVXSQAQLXR 2 8 2 0 565   | 1 | 704.8294 | 1407.644 | 2 | 27.68 | 0.023    | GPSGEVSAQLER   | Phospho (ST) | 0.0000001000000.0 | AJC_synth_test_25.1065.1065.2.dta |
| SXPFKXSPLXFGR 2 6 6 1 534   | 1 | 745.8518 | 1489.689 | 2 | 21.09 | 0.021    | SFPFKSPLFEGK   | Phospho (ST) | 0.0000001000000.0 | AJC_synth_test_25.1072.1072.2.dta |
| GPSGVXSQAQLXR 5 7 1 1 1144  | 1 | 676.8295 | 1351.644 | 2 | 46.83 | 0.00014  | GPSGLVSTAQLDK  | Phospho (ST) | 0.0000001000000.0 | AJC_synth_test_25.1080.1080.2.dta |
| GPSGVXSQAQLXR 3 6 0 1 722   | 1 | 664.8174 | 1327.62  | 2 | 33.14 | 0.00024  | GPSGVVSAQQLK   | Phospho (ST) | 0.0000001000000.0 | AJC_synth_test_25.1081.1081.2.dta |
| SXPFKXSPLXFGR 4 4 2 1 886   | 1 | 715.8416 | 1429.669 | 2 | 29.57 | 0.00078  | SFPFKSPLFEGK   | Phospho (ST) | 0.0000001000000.0 | AJC_synth_test_25.1087.1087.2.dta |
| SXPFKXSPLXFGR 0 2 2 1 46    | 1 | 758.8578 | 1515.701 | 2 | 20.84 | 0.035    | SAPFKSPLFEGK   | Phospho (ST) | 0.0000001000000.0 | AJC_synth_test_25.1089.1089.2.dta |
| GPSGVXSQAQLXR 3 4 1 0 683   | 1 | 685.8091 | 1369.604 | 2 | 72.02 | 1.20E-07 | GPSGVVSAQQLDR  | Phospho (ST) | 0.0000001000000.0 | AJC_synth_test_25.1095.1095.2.dta |
| GPSGVXSQAQLXR 0 4 5 0 91    | 1 | 646.8223 | 1291.63  | 2 | 21.67 | 0.013    | GPSGAVSAQQLR   | Phospho (ST) | 0.0000001000000.0 | AJC_synth_test_25.1096.1096.2.dta |
| SXPFKXSPLXFGR 7 2 2 1 1446  | 1 | 773.8646 | 1545.715 | 2 | 15.08 | 0.031    | SFPFKSPLFEGK   | Phospho (ST) | 0.0000001000000.0 | AJC_synth_test_25.1105.1105.2.dta |
| GPSGVXSQAQLXR 5 7 1 0 1143  | 1 | 690.8281 | 1379.642 | 2 | 44.67 | 0.00018  | GPSGLVSTAQLDR  | Phospho (ST) | 0.0000001000000.0 | AJC_synth_test_25.1112.1112.2.dta |
| SXPFKXSPLXFGR 2 6 2 0 525   | 1 | 780.8583 | 1559.702 | 2 | 27.14 | 0.0096   | SFPFKSPLFEGK   | Phospho (ST) | 0.0000001000000.0 | AJC_synth_test_25.1113.1113.2.dta |
| GPSGVXSQAQLXR 3 4 7 0 695   | 1 | 678.8193 | 1355.624 | 2 | 58.26 | 3.40E-06 | GPSGVVSAQQLTR  | Phospho (ST) | 0.0000001000000.0 | AJC_synth_test_25.1114.1114.2.dta |
| SXPFKXSPLXFGR 4 0 4 1 810   | 1 | 686.8383 | 1371.662 | 2 | 30.8  | 0.00024  | SFPFKASPLFEGK  | Phospho (ST) | 0.0000001000000.0 | AJC_synth_test_25.1119.1119.2.dta |
| GPSGVXSQAQLXR 6 5 1 1 1304  | 1 | 669.82   | 1337.626 | 2 | 40.72 | 0.00033  | GPSGVVSAQQLDK  | Phospho (ST) | 0.0000001000000.0 | AJC_synth_test_25.1120.1120.2.dta |
| SXPFKXSPLXFGR 0 6 9 1 140   | 1 | 754.8644 | 1507.714 | 2 | 24.63 | 0.029    | SAPFKSPLVFGK   | Phospho (ST) | 0.0000001000000.0 | AJC_synth_test_25.1121.1121.2.dta |
| GPSGVXSQAQLXR 5 6 0 0 1121  | 1 | 661.8246 | 1321.635 | 2 | 20.7  | 0.039    | GPSGLVSSAQLR   | Phospho (ST) | 0.0000001000000.0 | AJC_synth_test_25.1123.1123.2.dta |
| GPSGVXSQAQLXR 1 5 4 1 310   | 1 | 654.8151 | 1307.616 | 2 | 32.78 | 0.00028  | GPSGDVSAQLGK   | Phospho (ST) | 0.0000001000000.0 | AJC_synth_test_25.1130.1130.2.dta |
| SXPFKXSPLXFGR 6 6 9 1 1340  | 1 | 762.8627 | 1523.711 | 2 | 26.69 | 0.0093   | SFPFKSPLVFGK   | Phospho (ST) | 0.0000001000000.0 | AJC_synth_test_25.1137.1137.2.dta |
| GPSGVXSQAQLXR 5 0 4 1 1010  | 1 | 632.8199 | 1263.625 | 2 | 40.2  | 0.00014  | GPSGLVSSAQLGK  | Phospho (ST) | 0.0000001000000.0 | AJC_synth_test_25.1138.1138.2.dta |
| SXPFKXSPLXFGR 6 0 0 1 1202  | 1 | 708.8532 | 1415.692 | 2 | 22.96 | 0.038    | SFPFKASPLAFGK  | Phospho (ST) | 0.0000001000000.0 | AJC_synth_test_25.1143.1143.2.dta |
| SXPFKXSPLXFGR 4 6 9 1 940   | 1 | 747.8558 | 1493.697 | 2 | 28.63 | 0.012    | SFPFKSPLVFGK   | Phospho (ST) | 0.0000001000000.0 | AJC_synth_test_25.1144.1144.2.dta |
| SXPFKXSPLXFGR 4 0 0 1 802   | 1 | 693.8463 | 1385.678 | 2 | 26.24 | 0.0064   | SFPFKASPLAFGK  | Phospho (ST) | 0.0000001000000.0 | AJC_synth_test_25.1152.1152.2.dta |
| GPSGVXSQAQLXR 5 2 2 0 1045  | 1 | 711.8359 | 1421.657 | 2 | 38.84 | 0.00022  | GPSGLVSEAQLER  | Phospho (ST) | 0.0000001000000.0 | AJC_synth_test_25.1153.1153.2.dta |
| GPSGVXSQAQLXR 4 5 4 1 910   | 1 | 625.8107 | 1249.607 | 2 | 35.74 | 0.00036  | GPSGDVSAQLGK   | Phospho (ST) | 0.0000001000000.0 | AJC_synth_test_25.1154.1154.2.dta |
| SXPFKXSPLXFGR 2 1 2 0 425   | 1 | 794.855  | 1587.695 | 2 | 19.19 | 0.031    | SFPFKSPLFEGK   | Phospho (ST) | 0.0000001000000.0 | AJC_synth_test_25.1160.1160.2.dta |
| GPSGVXSQAQLXR 8 8 1 1 1764  | 1 | 668.8298 | 1335.645 | 2 | 41.69 | 0.0004   | GPSGVVSAQLDK   | Phospho (ST) | 0.0000001000000.0 | AJC_synth_test_25.1161.1161.2.dta |
| GPSGVXSQAQLXR 8 8 4 1 1770  | 1 | 639.827  | 1277.64  | 2 | 39.42 | 0.00031  | GPSGVVSAQLGK   | Phospho (ST) | 0.0000001000000.0 | AJC_synth_test_25.1164.1164.2.dta |
| SXPFKXSPLXFGR 7 9 2 1 1586  | 1 | 790.8748 | 157      |   |       |          |                |              |                   |                                   |

|                             |   |          |          |   |       |          |                |              |                  |                                  |
|-----------------------------|---|----------|----------|---|-------|----------|----------------|--------------|------------------|----------------------------------|
| SXPFKXSPLXFGFR 8 8 1 1 1764 | 1 | 750.8798 | 1499.745 | 2 | 22.93 | 0.026    | SVPFKVSPDLDFGK | Phospho (ST) | 0.00000010000000 | AJC_synth_test_25.1256.1256.2.da |
| GPSGVXSXAQLXR 5 1 8 0 1037  | 1 | 689.8401 | 1377.666 | 2 | 43.96 | 0.00013  | SPGSLVSDAQLVR  | Phospho (ST) | 0.00000010000000 | AJC_synth_test_25.1274.1274.2.da |
| SXPFKXSPLXFGFR 5 6 0 1 1122 | 1 | 729.8751 | 1457.736 | 2 | 20.03 | 0.042    | SLGPKSPLAFGK   | Phospho (ST) | 0.00000010000000 | AJC_synth_test_25.1279.1279.2.da |
| SXPFKXSPLXFGFR 4 4 5 1 892  | 1 | 707.8622 | 1413.71  | 2 | 22.32 | 0.015    | SVPFKSPLFLGK   | Phospho (ST) | 0.00000010000000 | AJC_synth_test_25.1280.1280.2.da |
| GPSGVXSXAQLXR 5 7 8 1 1158  | 1 | 668.8492 | 1335.684 | 2 | 21.14 | 0.047    | GPSGLVSTAQLVK  | Phospho (ST) | 0.00000010000000 | AJC_synth_test_25.1284.1284.2.da |
| SXPFKXSPLXFGFR 0 2 5 0 51   | 1 | 764.8831 | 1527.752 | 2 | 22.8  | 0.023    | SAPFKSPLFLGFR  | Phospho (ST) | 0.00000010000000 | AJC_synth_test_25.1289.1289.2.da |
| SXPFKXSPLXFGFR 9 2 9 1 1860 | 1 | 821.8828 | 1641.751 | 2 | 15.8  | 0.026    | SYPFKESPFLYFGK | Phospho (ST) | 0.00000010000000 | AJC_synth_test_25.1290.1290.2.da |
| SXPFKXSPLXFGFR 4 4 5 0 891  | 1 | 721.8633 | 1441.712 | 2 | 26.75 | 0.014    | SVPFKSPLFLGFR  | Phospho (ST) | 0.00000010000000 | AJC_synth_test_25.1295.1295.2.da |
| SXPFKXSPLXFGFR 2 1 5 1 432  | 1 | 772.8764 | 1543.738 | 2 | 26.23 | 0.018    | SEPFKDSPLFLGK  | Phospho (ST) | 0.00000010000000 | AJC_synth_test_25.1297.1297.2.da |
| SXPFKXSPLXFGFR 9 6 9 0 1939 | 1 | 814.8793 | 1627.744 | 2 | 37.45 | 0.00053  | SYPFKSSPLVYFGR | Phospho (ST) | 0.00000010000000 | AJC_synth_test_25.1300.1300.2.da |
| GPSGVXSXAQLXR 3 6 9 0 739   | 1 | 724.8301 | 1447.646 | 2 | 29.42 | 0.009    | GPSGFVSSAQLYR  | Phospho (ST) | 0.00000010000000 | AJC_synth_test_25.1301.1301.2.da |
| SXPFKXSPLXFGFR 9 7 2 0 1945 | 1 | 804.8775 | 1607.741 | 2 | 27.91 | 0.007    | SYPFKSPLFLGFR  | Phospho (ST) | 0.00000010000000 | AJC_synth_test_25.1303.1303.2.da |
| SXPFKXSPLXFGFR 9 4 9 0 1899 | 1 | 799.8735 | 1597.733 | 2 | 21.84 | 0.013    | SYPFKSPLVYFGR  | Phospho (ST) | 0.00000010000000 | AJC_synth_test_25.1311.1311.2.da |
| SXPFKXSPLXFGFR 4 9 4 1 990  | 1 | 732.8472 | 1463.68  | 2 | 26.92 | 0.048    | SGPFKSPFLGFK   | Phospho (ST) | 0.00000010000000 | AJC_synth_test_25.1312.1312.2.da |
| SXPFKXSPLXFGFR 9 2 9 0 1859 | 1 | 835.8848 | 1669.755 | 2 | 17.04 | 0.021    | SYPFKESPFLYFGR | Phospho (ST) | 0.00000010000000 | AJC_synth_test_25.1320.1320.2.da |
| SXPFKXSPLXFGFR 4 6 3 1 928  | 1 | 739.8585 | 1477.702 | 2 | 31.88 | 0.0046   | SGPFKSSPLFFGK  | Phospho (ST) | 0.00000010000000 | AJC_synth_test_25.1336.1336.2.da |
| GPSGVXSXAQLXR 5 8 1 1 1164  | 1 | 675.8377 | 1349.661 | 2 | 37.05 | 0.0012   | GPSGLVSAQLDK   | Phospho (ST) | 0.00000010000000 | AJC_synth_test_25.1339.1339.2.da |
| SXPFKXSPLXFGFR 9 0 9 1 1820 | 1 | 792.879  | 1583.743 | 2 | 27.96 | 0.007    | SYPFKASPLYFGK  | Phospho (ST) | 0.00000010000000 | AJC_synth_test_25.1343.1343.2.da |
| GPSGVXSXAQLXR 5 8 4 1 1170  | 1 | 646.8347 | 1291.655 | 2 | 49.87 | 5.40E-05 | GPSGLVSAQLGK   | Phospho (ST) | 0.00000010000000 | AJC_synth_test_25.1344.1344.2.da |
| SXPFKXSPLXFGFR 9 1 9 0 1839 | 1 | 828.8765 | 1655.738 | 2 | 23.06 | 0.012    | SYPFKSPLVYFGR  | Phospho (ST) | 0.00000010000000 | AJC_synth_test_25.1347.1347.2.da |
| GPSGVXSXAQLXR 9 5 6 1 1914  | 1 | 693.8373 | 1385.66  | 2 | 28.79 | 0.016    | GPSGVLSAQLSK   | Phospho (ST) | 0.00000010000000 | AJC_synth_test_25.1348.1348.2.da |
| SXPFKXSPLXFGFR 2 9 2 0 585  | 1 | 818.8774 | 1635.733 | 2 | 24.16 | 0.0098   | SEPFKSPFLGFR   | Phospho (ST) | 0.00000010000000 | AJC_synth_test_25.1349.1349.2.da |
| GPSGVXSXAQLXR 5 0 9 1 1020  | 1 | 685.8414 | 1369.668 | 2 | 39.81 | 0.00054  | GPSGLVSAALYK   | Phospho (ST) | 0.00000010000000 | AJC_synth_test_25.1354.1354.2.da |
| GPSGVXSXAQLXR 9 5 4 1 1910  | 1 | 678.832  | 1355.649 | 2 | 36.59 | 0.0013   | GPSGVLSAQLGK   | Phospho (ST) | 0.00000010000000 | AJC_synth_test_25.1359.1359.2.da |
| GPSGVXSXAQLXR 5 8 2 1 1166  | 1 | 682.8466 | 1363.679 | 2 | 48.04 | 8.70E-05 | GPSGLVSAQLEK   | Phospho (ST) | 0.00000010000000 | AJC_synth_test_25.1361.1361.2.da |
| GPSGVXSXAQLXR 4 0 3 0 807   | 1 | 663.8113 | 1325.608 | 2 | 36.05 | 0.0017   | GPSGGVSAQLFR   | Phospho (ST) | 0.00000010000000 | AJC_synth_test_25.1363.1363.2.da |
| SXPFKXSPLXFGFR 5 2 9 1 1060 | 1 | 796.894  | 1591.774 | 2 | 24.41 | 0.0089   | SLPFKESPLYFGK  | Phospho (ST) | 0.00000010000000 | AJC_synth_test_25.1375.1375.2.da |
| GPSGVXSXAQLXR 5 8 4 0 1169  | 1 | 660.8381 | 1319.662 | 2 | 61.77 | 1.10E-06 | GPSGLVSAQLGR   | Phospho (ST) | 0.00000010000000 | AJC_synth_test_25.1376.1376.2.da |
| GPSGVXSXAQLXR 5 0 8 1 1018  | 1 | 653.8427 | 1305.671 | 2 | 53.11 | 2.10E-05 | GPSGLVSAQLVK   | Phospho (ST) | 0.00000010000000 | AJC_synth_test_25.1377.1377.2.da |
| SXPFKXSPLXFGFR 0 9 9 0 199  | 1 | 806.882  | 1611.749 | 2 | 34.81 | 0.00079  | SAPFKSPLVYFGR  | Phospho (ST) | 0.00000010000000 | AJC_synth_test_25.1384.1384.2.da |
| SXPFKXSPLXFGFR 5 0 4 0 1009 | 1 | 728.8711 | 1455.728 | 2 | 31.93 | 0.0022   | SLPFKASPLGFR   | Phospho (ST) | 0.00000010000000 | AJC_synth_test_25.1385.1385.2.da |
| GPSGVXSXAQLXR 5 0 9 0 1019  | 1 | 699.8423 | 1397.67  | 2 | 59.56 | 5.00E-06 | GPSGLVSAALYR   | Phospho (ST) | 0.00000010000000 | AJC_synth_test_25.1388.1388.2.da |
| GPSGVXSXAQLXR 5 8 1 0 1163  | 1 | 689.8414 | 1377.668 | 2 | 45.77 | 9.40E-05 | GPSGLVSAQLDR   | Phospho (ST) | 0.00000010000000 | AJC_synth_test_25.1391.1391.2.da |
| GPSGVXSXAQLXR 9 3 6 1 1874  | 1 | 710.8311 | 1419.648 | 2 | 34.63 | 0.0028   | GPSGVSFAQLSK   | Phospho (ST) | 0.00000010000000 | AJC_synth_test_25.1392.1392.2.da |
| GPSGVXSXAQLXR 3 0 9 1 620   | 1 | 702.8334 | 1403.652 | 2 | 29.55 | 0.0092   | GPSGFVSAALYK   | Phospho (ST) | 0.00000010000000 | AJC_synth_test_25.1394.1394.2.da |
| SXPFKXSPLXFGFR 4 0 3 1 808  | 1 | 731.861  | 1461.707 | 2 | 36.23 | 0.00039  | SGPFKASPLFFGK  | Phospho (ST) | 0.00000010000000 | AJC_synth_test_25.1400.1400.2.da |
| SXPFKXSPLXFGFR 5 0 0 0 1001 | 1 | 735.8795 | 1469.744 | 2 | 33.02 | 0.00052  | SLPFKASPLAFGR  | Phospho (ST) | 0.00000010000000 | AJC_synth_test_25.1401.1401.2.da |
| GPSGVXSXAQLXR 5 6 5 1 1132  | 1 | 668.8478 | 1335.681 | 2 | 52.41 | 3.50E-05 | GPSGLVSAQLK    | Phospho (ST) | 0.00000010000000 | AJC_synth_test_25.1404.1404.2.da |
| GPSGVXSXAQLXR 9 5 6 0 1913  | 1 | 707.8387 | 1413.663 | 2 | 25.33 | 0.018    | GPSGVLSAQLSR   | Phospho (ST) | 0.00000010000000 | AJC_synth_test_25.1405.1405.2.da |
| GPSGVXSXAQLXR 5 8 2 0 1165  | 1 | 696.8495 | 1391.684 | 2 | 48.7  | 6.10E-05 | GPSGLVSAQLER   | Phospho (ST) | 0.00000010000000 | AJC_synth_test_25.1408.1408.2.da |
| SXPFKXSPLXFGFR 0 8 1 0 163  | 1 | 750.8651 | 1499.716 | 2 | 30.48 | 0.0066   | SAPFKVSPDLDFGR | Phospho (ST) | 0.00000010000000 | AJC_synth_test_25.1415.1415.2.da |
| SXPFKXSPLXFGFR 1 2 5 0 251  | 1 | 786.8764 | 1571.738 | 2 | 19.97 | 0.05     | SDPFKESPLFLGFR | Phospho (ST) | 0.00000010000000 | AJC_synth_test_25.1417.1417.2.da |
| GPSGVXSXAQLXR 5 4 5 0 1091  | 1 | 667.8455 | 1333.676 | 2 | 80.79 | 1.60E-08 | GPSGLVSAQLLR   | Phospho (ST) | 0.00000010000000 | AJC_synth_test_25.1418.1418.2.da |
| GPSGVXSXAQLXR 3 8 1 0 763   | 1 | 706.8329 | 1411.651 | 2 | 53.43 | 1.20E-05 | GPSGFVSAQLDR   | Phospho (ST) | 0.00000010000000 | AJC_synth_test_25.1419.1419.2.da |
| GPSGVXSXAQLXR 3 0 8 1 618   | 1 | 670.8347 | 1339.655 | 2 | 49.93 | 9.10E-05 | GPSGFVSAQLVK   | Phospho (ST) | 0.00000010000000 | AJC_synth_test_25.1420.1420.2.da |
| GPSGVXSXAQLXR 3 0 9 0 619   | 1 | 716.8343 | 1431.654 | 2 | 42.34 | 0.00045  | GPSGFVSAALYR   | Phospho (ST) | 0.00000010000000 | AJC_synth_test_25.1421.1421.2.da |
| SXPFKXSPLXFGFR 4 8 8 1 978  | 1 | 721.8763 | 1441.738 | 2 | 35.49 | 0.00097  | SGPFKSPVLFVFGK | Phospho (ST) | 0.00000010000000 | AJC_synth_test_25.1425.1425.2.da |
| GPSGVXSXAQLXR 9 3 1 1 1864  | 1 | 724.8289 | 1447.643 | 2 | 46.88 | 0.00015  | GPSGVSFAQLDK   | Phospho (ST) | 0.00000010000000 | AJC_synth_test_25.1426.1426.2.da |
| GPSGVXSXAQLXR 3 8 4 0 769   | 1 | 677.8293 | 1353.644 | 2 | 51.67 | 3.30E-05 | GPSGFVSAQLGR   | Phospho (ST) | 0.00000010000000 | AJC_synth_test_25.1427.1427.2.da |
| SXPFKXSPLXFGFR 9 9 2 0 1985 | 1 | 835.885  | 1669.756 | 2 | 30.69 | 0.0009   | SYPFKSPLFLGFR  | Phospho (ST) | 0.00000010000000 | AJC_synth_test_25.1439.1439.2.da |
| SXPFKXSPLXFGFR 9 9 4 0 1989 | 1 | 799.8744 | 1597.734 | 2 | 25.65 | 0.0045   | SYPFKSPLGFR    | Phospho (ST) | 0.00000010000000 | AJC_synth_test_25.1440.1440.2.da |
| GPSGVXSXAQLXR 9 3 1 0 1863  | 1 | 738.8309 | 1475.647 | 2 | 50.1  | 4.00E-05 | GPSGVSFAQLDR   | Phospho (ST) | 0.00000010000000 | AJC_synth_test_25.1448.1448.2.da |
| SXPFKXSPLXFGFR 9 9 9 1 2000 | 1 | 838.8909 | 1675.767 | 2 | 24.9  | 0.0032   | SYPFKSPLVYFGK  | Phospho (ST) | 0.00000010000000 | AJC_synth_test_25.1459.1459.2.da |
| SXPFKXSPLXFGFR 8 9 9 0 1799 | 1 | 820.8976 | 1639.781 | 2 | 13.59 | 0.044    | SVPFKSPLVYFGR  | Phospho (ST) | 0.00000010000000 | AJC_synth_test_25.1465.1465.2.da |
| GPSGVXSXAQLXR 3 4 5 0 691   | 1 | 684.8378 | 1367.661 | 2 | 23.64 | 0.018    | GPSGFVSAQLLR   | Phospho (ST) | 0.00000010000000 | AJC_synth_test_25.1466.1466.2.da |
| GPSGVXSXAQLXR 4 5 8 1 918   | 1 | 646.8354 | 1291.656 | 2 | 40.03 | 0.00052  | GPSGLVSAQLVK   | Phospho (ST) | 0.00000010000000 | AJC_synth_test_25.1467.1467.2.da |
| GPSGVXSXAQLXR 6 8 5 1 1372  | 1 | 661.8386 | 1321.663 | 2 | 35.95 | 0.0013   | GPSGSVSAQLK    | Phospho (ST) | 0.00000010000000 | AJC_synth_test_25.1469.1469.2.da |
| SXPFKXSPLXFGFR 5 0 8 0 1017 | 1 | 749.8955 | 1497.777 | 2 | 25    | 0.0047   | SLPFKASPLVYFGR | Phospho (ST) | 0.00000010000000 | AJC_synth_test_25.1479.1479.2.da |
| SXPFKXSPLXFGFR 0 8 0 1 162  | 1 | 714.8698 | 1427.725 | 2 | 23.02 | 0.012    | SAPFKSPLAFGK   | Phospho (ST) | 0.00000010000000 | AJC_synth_test_25.1488.1488.2.da |
| SXPFKXSPLXFGFR 9 9 9 0 1999 | 1 | 852.8956 | 1703.777 | 2 | 24.43 | 0.0036   | SYPFKSPLVYFGR  | Phospho (ST) | 0.00000010000000 | AJC_synth_test_25.1490.1490.2.da |
| SXPFKXSPLXFGFR 2 9 5 1 592  | 1 | 796.8946 | 1591.775 | 2 | 19.2  | 0.035    | SEPFKSPFLGK    | Phospho (ST) | 0.00000010000000 | AJC_synth_test_25.1496.1496.2.da |
| SXPFKXSPLXFGFR 0 5 4 0 109  | 1 | 728.872  | 1455.73  | 2 | 41.09 | 0.00027  | SAPFKSPLGFR    | Phospho (ST) | 0.00000010000000 | AJC_synth_test_25.1503.1503.2.da |
| SXPFKXSPLXFGFR 0 8 6 0 173  | 1 | 736.867  | 1471.72  | 2 | 25.72 | 0.01     | SAPFKSPLSFR    | Phospho (ST) | 0.00000010000000 | AJC_synth_test_25.1505.1505.2.da |
| SXPFKXSPLXFGFR 7 5 2 1 1506 | 1 | 765.8847 | 1529.755 | 2 | 25.46 | 0.0047   | STPFKLSPLFLGK  | Phospho (ST) | 0.00000010000000 | AJC_synth_test_25.1506.1506.2.da |
| SXPFKXSPLXFGFR 9 1 3 1 1828 | 1 | 806.8754 | 1611.736 | 2 | 20.16 | 0.016    | SVPFKDSPLFFGK  | Phospho (ST) | 0.00000010000000 | AJC_synth_test_25.1507.1507.2.da |
| GPSGVXSXAQLXR 9 0 3 1 1808  | 1 | 702.8327 | 1403.651 | 2 | 36.48 | 0.0019   | GPSGVSAQLFK    | Phospho (ST) | 0.00000010000000 | AJC_synth_test_25.1511.1511.2.da |
| SXPFKXSPLXFGFR 9 0 3 1 1808 | 1 | 784.8819 | 1567.749 | 2 | 18.91 | 0.034    | SYPFKASPLFFGK  | Phospho (ST) | 0.00000010000000 | AJC_synth_test_25.1519.1519.2.da |
| SXPFKXSPLXFGFR 5 1 5 0 1031 | 1 | 778.8979 | 1555.781 | 2 | 24.85 | 0.012    | SLPFKDSPLFLGFR | Phospho (ST) | 0.00000010000000 | AJC_synth_test_25.1521.1521.2.da |
| GPSGVXSXAQLXR 5 6 3 1 1128  | 1 | 685.8403 | 1369.666 | 2 | 28.56 | 0.0072   | GPSGLVSAQLFK   | Phospho (ST) | 0.00000010000000 | AJC_synth_test_25.1524.1524.2.da |
| GPSGVXSXAQLXR 0 8 5 1 172   | 1 | 653.8427 | 1305.671 | 2 | 29.57 | 0.0048   | GPSGAVSAQLK    | Phospho (ST) | 0.00000010000000 | AJC_synth_test_25.1528.1528.2.da |
| SXPFKXSPLXFGFR 7 8 2 1 1566 | 1 | 758.8778 | 1515.741 | 2 | 24.93 | 0.013    | STPFKSPLEFGK   | Phospho (ST) | 0.00000010000000 | AJC_synth_test_25.1543.1543.2.da |
| SXPFKXSPLXFGFR 4 3 4 1 870  | 1 | 724.8536 | 1447.693 | 2 | 29.53 | 0.0013   | SGPFKESPLGFK   | Phospho (ST) | 0.00000010000000 | AJC_synth_test_25.1544.1544.2.da |
| SXPFKXSPLXFGFR 4 9 3 1 988  | 1 | 777.874  | 1553.734 | 2 | 21.25 | 0.027    | SGPFKSPVLFVFGK | Phospho (ST) | 0.00000010000000 | AJC_synth_test_25.1545.1545.2.da |
| GPSGVXSXAQLXR 9 0 3 0 1807  | 1 | 716.8357 | 1431.657 | 2 | 47.58 | 9.20E-05 | GPSGVSFAQLFR   | Phospho (ST) | 0.00000010000000 | AJC_synth_test_25.1546.1546.2.da |
| GPSGVXSXAQLXR 5 6 5 1 1114  | 1 | 668.848  | 1335.682 | 2 | 22.77 | 0.032    | GPSGLVLSAQLSK  | Phospho (ST) | 0.00000010000000 | AJC_synth_test_25.1549.1549.2.da |
| SXPFKXSPLXFGFR 4 3 6 1 874  | 1 | 739.8571 | 1477.7   | 2 | 25.03 | 0.023    | SGPFKSPFLGFK   | Phospho (ST) | 0.00000010000000 | AJC_synth_test_25.1553.1553.2.da |
| GPSGVXSXAQLXR 3 4 3 1 688   | 1 | 687.8262 | 1373.638 | 2 | 34.99 | 0.0023   | GPSGFVSAQLFK   | Phospho (ST) | 0.00000010000000 | AJC_synth_test_25.1554.1554.2.da |
| GPSGVXSXAQLXR 3 7 5 0 751   | 1 | 706.8503 | 1411.686 | 2 | 24.26 | 0.0056   | GPSGFVSTAQLLR  | Phospho (ST) | 0.00000010000000 | AJC_synth_test_25.1556.1556.2.da |
| SXPFKXSPLXFGFR 0 5 1 0 103  | 1 | 757.8749 | 1513.735 | 2 | 21.01 | 0.025    | SAPFKLSPLDFGR  | Phospho (ST) | 0.00000010000000 | AJC_synth_test_25.1559.1559.2.da |

|                           |   |          |          |   |       |          |               |              |                  |                                   |
|---------------------------|---|----------|----------|---|-------|----------|---------------|--------------|------------------|-----------------------------------|
| GPSGVXSAQXLR 3 3 2 0 665  | 1 | 737.8397 | 1473.665 | 2 | 51.59 | 2.90E-05 | GPSGVFVSAQLER | Phospho (ST) | 0.00000010000000 | AJC_synth_test_25.1667.1667.2.dta |
| GPSGVXSAQXLR 5 5 7 0 1115 | 1 | 689.8583 | 1377.702 | 2 | 53.77 | 1.60E-05 | GPSGLVLSAQLTR | Phospho (ST) | 0.00000010000000 | AJC_synth_test_25.1668.1668.2.dta |
| GPSGVXSAQXLR 5 3 7 0 1075 | 1 | 706.849  | 1411.683 | 2 | 32.01 | 0.0023   | GPSGLVLSAQLTR | Phospho (ST) | 0.00000010000000 | AJC_synth_test_25.1672.1672.2.dta |
| SXPFKXSPLXFR 5 5 6 1 1114 | 1 | 750.8975 | 1499.781 | 2 | 21.09 | 0.018    | SLPFKLSPLFGK  | Phospho (ST) | 0.00000010000000 | AJC_synth_test_25.1681.1681.2.dta |
| GPSGVXSAQXLR 8 5 8 1 1718 | 1 | 667.8602 | 1333.706 | 2 | 58.84 | 2.90E-06 | GPSGVVLSAQLVK | Phospho (ST) | 0.00000010000000 | AJC_synth_test_25.1683.1683.2.dta |
| SXPFKXSPLXFR 1 5 8 1 318  | 1 | 757.8891 | 1513.764 | 2 | 26.79 | 0.013    | SDPFKLSPLVFGK | Phospho (ST) | 0.00000010000000 | AJC_synth_test_25.1687.1687.2.dta |
| GPSGVXSAQXLR 4 5 5 1 912  | 1 | 653.8441 | 1305.674 | 2 | 64.49 | 1.50E-06 | GPSGGVLSAQLLK | Phospho (ST) | 0.00000010000000 | AJC_synth_test_25.1688.1688.2.dta |
| GPSGVXSAQXLR 3 3 0 1 662  | 1 | 694.8361 | 1387.658 | 2 | 21.92 | 0.043    | GPSGVVLSAQLAK | Phospho (ST) | 0.00000010000000 | AJC_synth_test_25.1689.1689.2.dta |
| GPSGVXSAQXLR 9 8 5 0 1971 | 1 | 713.8601 | 1425.706 | 2 | 48.13 | 3.20E-05 | GPSGVVLSAQLLR | Phospho (ST) | 0.00000010000000 | AJC_synth_test_25.1703.1703.2.dta |
| GPSGVXSAQXLR 5 1 5 0 1031 | 1 | 696.8498 | 1391.685 | 2 | 29.14 | 0.0055   | GPSGLVSDAQLLR | Phospho (ST) | 0.00000010000000 | AJC_synth_test_25.1704.1704.2.dta |
| SXPFKXSPLXFR 9 8 3 0 1967 | 1 | 812.9009 | 1623.787 | 2 | 33.18 | 0.00065  | SYPFKVSPFLFGR | Phospho (ST) | 0.00000010000000 | AJC_synth_test_25.1711.1711.2.dta |
| SXPFKXSPLXFR 5 6 5 0 1131 | 1 | 764.9008 | 1527.787 | 2 | 26.94 | 0.0031   | SLPFKSPFLFGR  | Phospho (ST) | 0.00000010000000 | AJC_synth_test_25.1712.1712.2.dta |
| SXPFKXSPLXFR 4 3 5 1 872  | 1 | 752.8854 | 1503.756 | 2 | 26.68 | 0.0039   | SGPFKSPFLFGR  | Phospho (ST) | 0.00000010000000 | AJC_synth_test_25.1713.1713.2.dta |
| SXPFKXSPLXFR 5 5 0 0 1101 | 1 | 756.9030 | 1511.791 | 2 | 32.99 | 0.0005   | SLPFKLSPLAFGR | Phospho (ST) | 0.00000010000000 | AJC_synth_test_25.1719.1719.2.dta |
| GPSGVXSAQXLR 0 5 5 1 1112 | 1 | 660.8506 | 1319.687 | 2 | 27.62 | 0.0056   | GPSGAVLSAQLLK | Phospho (ST) | 0.00000010000000 | AJC_synth_test_25.1724.1724.2.dta |
| SXPFKXSPLXFR 5 5 4 0 1109 | 1 | 749.8963 | 1497.778 | 2 | 38.29 | 0.00022  | SLPFKLSPLFGR  | Phospho (ST) | 0.00000010000000 | AJC_synth_test_25.1727.1727.2.dta |
| SXPFKXSPLXFR 3 9 5 1 792  | 1 | 805.9068 | 1609.799 | 2 | 17.05 | 0.021    | SFPFKVSPFLFGR | Phospho (ST) | 0.00000010000000 | AJC_synth_test_25.1728.1728.2.dta |
| GPSGVXSAQXLR 5 0 3 0 1007 | 1 | 691.8464 | 1381.678 | 2 | 65.41 | 4.30E-07 | GPSGLVLSAQLFR | Phospho (ST) | 0.00000010000000 | AJC_synth_test_25.1729.1729.2.dta |
| SXPFKXSPLXFR 5 9 3 0 1187 | 1 | 819.9111 | 1637.808 | 2 | 15.48 | 0.038    | SLPFKVSPLFGR  | Phospho (ST) | 0.00000010000000 | AJC_synth_test_25.1735.1735.2.dta |
| GPSGVXSAQXLR 0 3 5 1 72   | 1 | 677.8444 | 1353.674 | 2 | 32.69 | 0.002    | GPSGAVLSAQLLK | Phospho (ST) | 0.00000010000000 | AJC_synth_test_25.1736.1736.2.dta |
| GPSGVXSAQXLR 2 3 5 0 471  | 1 | 720.8483 | 1439.682 | 2 | 31.05 | 0.0026   | GPSGEVSAQLLR  | Phospho (ST) | 0.00000010000000 | AJC_synth_test_25.1753.1753.2.dta |
| GPSGVXSAQXLR 0 5 5 0 1111 | 1 | 674.853  | 1347.691 | 2 | 35.54 | 0.00028  | GPSGAVLSAQLLR | Phospho (ST) | 0.00000010000000 | AJC_synth_test_25.1760.1760.2.dta |
| SXPFKXSPLXFR 0 5 3 0 107  | 1 | 773.8961 | 1545.778 | 2 | 32.76 | 0.00053  | SAPFKLSPLFGR  | Phospho (ST) | 0.00000010000000 | AJC_synth_test_25.1767.1767.2.dta |
| GPSGVXSAQXLR 3 5 9 0 719  | 1 | 737.8595 | 1473.704 | 2 | 32.62 | 0.002    | GPSGVVLSAQLYR | Phospho (ST) | 0.00000010000000 | AJC_synth_test_25.1783.1783.2.dta |
| GPSGVXSAQXLR 6 5 3 0 1307 | 1 | 699.8425 | 1397.671 | 2 | 43.79 | 0.00011  | GPSGVVLSAQLFR | Phospho (ST) | 0.00000010000000 | AJC_synth_test_25.1784.1784.2.dta |
| GPSGVXSAQXLR 9 8 3 1 1968 | 1 | 716.8483 | 1431.682 | 2 | 24.05 | 0.021    | GPSGVVLSAQLFK | Phospho (ST) | 0.00000010000000 | AJC_synth_test_25.1787.1787.2.dta |
| SXPFKXSPLXFR 5 4 3 0 1087 | 1 | 766.8881 | 1531.762 | 2 | 21.01 | 0.014    | SLPFKVSPLFGR  | Phospho (ST) | 0.00000010000000 | AJC_synth_test_25.1791.1791.2.dta |
| GPSGVXSAQXLR 9 8 3 0 1967 | 1 | 730.8513 | 1459.688 | 2 | 53.38 | 1.80E-05 | GPSGVVLSAQLFR | Phospho (ST) | 0.00000010000000 | AJC_synth_test_25.1792.1792.2.dta |
| SXPFKXSPLXFR 3 3 0 1 662  | 1 | 776.8859 | 1551.757 | 2 | 15.81 | 0.028    | SFPFKFSLAFGR  | Phospho (ST) | 0.00000010000000 | AJC_synth_test_25.1793.1793.2.dta |
| GPSGVXSAQXLR 3 3 9 0 719  | 1 | 754.8515 | 1507.689 | 2 | 58.26 | 6.00E-06 | GPSGVVLSAQLYR | Phospho (ST) | 0.00000010000000 | AJC_synth_test_25.1807.1807.2.dta |
| GPSGVXSAQXLR 4 3 3 1 868  | 1 | 687.8275 | 1373.64  | 2 | 45.48 | 0.0002   | GPSGGVLSAQLFK | Phospho (ST) | 0.00000010000000 | AJC_synth_test_25.1808.1808.2.dta |
| GPSGVXSAQXLR 4 5 3 0 907  | 1 | 684.8384 | 1367.662 | 2 | 24.04 | 0.017    | GPSGGVLSAQLFR | Phospho (ST) | 0.00000010000000 | AJC_synth_test_25.1815.1815.2.dta |
| SXPFKXSPLXFR 5 8 3 0 1167 | 1 | 787.9127 | 1573.811 | 2 | 15.81 | 0.026    | SLPFKVSPLFGR  | Phospho (ST) | 0.00000010000000 | AJC_synth_test_25.1824.1824.2.dta |
| GPSGVXSAQXLR 3 5 5 1 712  | 1 | 698.8688 | 1395.723 | 2 | 16.68 | 0.047    | GPSGVVLSAQLLK | Phospho (ST) | 0.00000010000000 | AJC_synth_test_25.1831.1831.2.dta |
| GPSGVXSAQXLR 4 3 3 0 867  | 1 | 701.8298 | 1401.645 | 2 | 39.22 | 0.00022  | GPSGGVLSAQLFR | Phospho (ST) | 0.00000010000000 | AJC_synth_test_25.1841.1841.2.dta |
| GPSGVXSAQXLR 3 5 8 1 718  | 1 | 691.8606 | 1381.707 | 2 | 42.03 | 0.00017  | GPSGVVLSAQLVK | Phospho (ST) | 0.00000010000000 | AJC_synth_test_25.1847.1847.2.dta |
| GPSGVXSAQXLR 9 3 5 1 1872 | 1 | 723.8575 | 1445.701 | 2 | 35.81 | 0.0013   | GPSGGVLSAQLLK | Phospho (ST) | 0.00000010000000 | AJC_synth_test_25.1856.1856.2.dta |
| SXPFKXSPLXFR 9 5 3 0 1907 | 1 | 819.9108 | 1637.807 | 2 | 18.19 | 0.02     | SYPFKVSPFLFGR | Phospho (ST) | 0.00000010000000 | AJC_synth_test_25.1857.1857.2.dta |
| GPSGVXSAQXLR 5 8 8 0 1117 | 1 | 688.8704 | 1375.726 | 2 | 71.98 | 1.20E-07 | GPSGLVLSAQLVR | Phospho (ST) | 0.00000010000000 | AJC_synth_test_25.1863.1863.2.dta |
| SXPFKXSPLXFR 9 3 3 0 1867 | 1 | 836.9013 | 1671.788 | 2 | 30.71 | 0.0013   | SYPFKVSPFLFGR | Phospho (ST) | 0.00000010000000 | AJC_synth_test_25.1864.1864.2.dta |
| GPSGVXSAQXLR 5 8 5 1 1172 | 1 | 674.8678 | 1347.721 | 2 | 43.22 | 0.00014  | GPSGLVLSAQLLK | Phospho (ST) | 0.00000010000000 | AJC_synth_test_25.1871.1871.2.dta |
| GPSGVXSAQXLR 9 5 5 0 1911 | 1 | 720.8683 | 1439.722 | 2 | 66.77 | 4.40E-07 | GPSGVVLSAQLLR | Phospho (ST) | 0.00000010000000 | AJC_synth_test_25.1879.1879.2.dta |
| SXPFKXSPLXFR 5 3 5 1 1072 | 1 | 780.9178 | 1559.821 | 2 | 13.02 | 0.05     | SLPFKVSPLFGR  | Phospho (ST) | 0.00000010000000 | AJC_synth_test_25.1880.1880.2.dta |
| GPSGVXSAQXLR 3 5 8 0 717  | 1 | 705.8629 | 1409.711 | 2 | 48.3  | 1.80E-05 | GPSGVVLSAQLVR | Phospho (ST) | 0.00000010000000 | AJC_synth_test_25.1881.1881.2.dta |
| SXPFKXSPLXFR 1 5 3 0 307  | 1 | 795.892  | 1589.769 | 2 | 25.02 | 0.009    | SDPFKLSPLFGR  | Phospho (ST) | 0.00000010000000 | AJC_synth_test_25.1882.1882.2.dta |
| SXPFKXSPLXFR 5 5 5 1 1112 | 1 | 763.9246 | 1525.835 | 2 | 21.21 | 0.0076   | SLPFKLSPLFGR  | Phospho (ST) | 0.00000010000000 | AJC_synth_test_25.1895.1895.2.dta |
| SXPFKXSPLXFR 5 5 5 0 1111 | 1 | 777.9287 | 1553.843 | 2 | 14.58 | 0.047    | SLPFKVSPLFGR  | Phospho (ST) | 0.00000010000000 | AJC_synth_test_25.1911.1911.2.dta |
| GPSGVXSAQXLR 9 3 3 1 1868 | 1 | 740.8494 | 1479.684 | 2 | 43.36 | 0.00044  | GPSGVVLSAQLFK | Phospho (ST) | 0.00000010000000 | AJC_synth_test_25.1943.1943.2.dta |
| GPSGVXSAQXLR 8 3 5 1 1672 | 1 | 691.8609 | 1381.707 | 2 | 19.86 | 0.028    | GPSGGVLSAQLLK | Phospho (ST) | 0.00000010000000 | AJC_synth_test_25.1960.1960.2.dta |
| GPSGVXSAQXLR 9 3 3 0 1867 | 1 | 754.8519 | 1507.689 | 2 | 45.57 | 0.00011  | GPSGVVLSAQLFR | Phospho (ST) | 0.00000010000000 | AJC_synth_test_25.1969.1969.2.dta |
| GPSGVXSAQXLR 3 8 3 0 767  | 1 | 722.8521 | 1443.69  | 2 | 30.69 | 0.0033   | GPSGGVLSAQLFR | Phospho (ST) | 0.00000010000000 | AJC_synth_test_25.1977.1977.2.dta |
| GPSGVXSAQXLR 8 5 3 0 1707 | 1 | 705.8621 | 1409.71  | 2 | 37.83 | 0.0002   | GPSGVVLSAQLFR | Phospho (ST) | 0.00000010000000 | AJC_synth_test_25.1991.1991.2.dta |
| GPSGVXSAQXLR 5 3 5 1 1072 | 1 | 698.8674 | 1395.72  | 2 | 37.86 | 0.00038  | GPSGGVLSAQLLK | Phospho (ST) | 0.00000010000000 | AJC_synth_test_25.2002.2002.2.dta |
| GPSGVXSAQXLR 3 3 5 1 672  | 1 | 715.8609 | 1429.707 | 2 | 40.58 | 0.00033  | GPSGVVLSAQLLK | Phospho (ST) | 0.00000010000000 | AJC_synth_test_25.2023.2023.2.dta |
| GPSGVXSAQXLR 5 5 5 1 1112 | 1 | 681.8762 | 1361.738 | 2 | 55.09 | 5.10E-06 | GPSGLVLSAQLLK | Phospho (ST) | 0.00000010000000 | AJC_synth_test_25.2025.2025.2.dta |
| GPSGVXSAQXLR 5 3 5 0 1071 | 1 | 712.8709 | 1423.727 | 2 | 32.11 | 0.00062  | GPSGLVLSAQLLR | Phospho (ST) | 0.00000010000000 | AJC_synth_test_25.2031.2031.2.dta |
| GPSGVXSAQXLR 3 3 5 0 671  | 1 | 729.8617 | 1457.709 | 2 | 31.28 | 0.0019   | GPSGVVLSAQLLR | Phospho (ST) | 0.00000010000000 | AJC_synth_test_25.2047.2047.2.dta |
| GPSGVXSAQXLR 5 5 5 0 1111 | 1 | 695.8791 | 1389.744 | 2 | 54.5  | 3.50E-06 | GPSGLVLSAQLLR | Phospho (ST) | 0.00000010000000 | AJC_synth_test_25.2055.2055.2.dta |
| GPSGVXSAQXLR 5 3 3 1 1108 | 1 | 698.8689 | 1395.723 | 2 | 48.65 | 3.00E-05 | GPSGLVLSAQLFK | Phospho (ST) | 0.00000010000000 | AJC_synth_test_25.2111.2111.2.dta |
| GPSGVXSAQXLR 3 3 3 0 667  | 1 | 746.8554 | 1491.696 | 2 | 25.45 | 0.0064   | GPSGVVLSAQLFR | Phospho (ST) | 0.00000010000000 | AJC_synth_test_25.2147.2147.2.dta |
| GPSGVXSAQXLR 5 5 3 0 1107 | 1 | 712.8719 | 1423.729 | 2 | 47.16 | 4.00E-05 | GPSGLVLSAQLFR | Phospho (ST) | 0.00000010000000 | AJC_synth_test_25.2151.2151.2.dta |
| GPSGVXSAQXLR 0 1 0 1 22   | 1 | 640.8    | 1279.585 | 2 | 53.69 | 3.80E-05 | GPSGAVSDAQLAK | Phospho (ST) | 0.00000010000000 | AJC_synth_test_25.783.783.2.dta   |
| GPSGVXSAQXLR 2 1 1 0 423  | 1 | 705.8006 | 1409.587 | 2 | 19.38 | 0.019    | GPSGEVSDAQLDR | Phospho (ST) | 0.00000010000000 | AJC_synth_test_25.793.793.2.dta   |
| GPSGVXSAQXLR 6 0 6 0 1213 | 1 | 648.7988 | 1295.583 | 2 | 45.19 | 4.50E-05 | GPSGGVLSAQLSR | Phospho (ST) | 0.00000010000000 | AJC_synth_test_25.799.799.2.dta   |
| GPSGVXSAQXLR 6 0 7 0 1215 | 1 | 655.8067 | 1309.599 | 2 | 21.6  | 0.0093   | GPSGGVLSAQLTR | Phospho (ST) | 0.00000010000000 | AJC_synth_test_25.807.807.2.dta   |
| GPSGVXSAQXLR 1 7 7 0 355  | 1 | 684.8135 | 1367.613 | 2 | 18.88 | 0.031    | GPSGDVSAQLTR  | Phospho (ST) | 0.00000010000000 | AJC_synth_test_25.808.808.2.dta   |
| GPSGVXSAQXLR 2 7 1 0 543  | 1 | 698.811  | 1395.608 | 2 | 55.94 | 1.50E-05 | GPSGEVSTAQLDR | Phospho (ST) | 0.00000010000000 | AJC_synth_test_25.815.815.2.dta   |
| GPSGVXSAQXLR 1 0 6 0 213  | 1 | 662.7981 | 1323.582 | 2 | 44.79 | 0.00013  | GPSGGVLSAQLSR | Phospho (ST) | 0.00000010000000 | AJC_synth_test_25.816.816.2.dta   |
| GPSGVXSAQXLR 1 1 7 0 235  | 1 | 691.8031 | 1381.592 | 2 | 28.56 | 0.004    | GPSGDVSDAQLTR | Phospho (ST) | 0.00000010000000 | AJC_synth_test_25.817.817.2.dta   |
| GPSGVXSAQXLR 2 1 2 0 425  | 1 | 712.809  | 1423.603 | 2 | 39.2  | 0.00072  | GPSGEVSDAQLER | Phospho (ST) | 0.00000010000000 | AJC_synth_test_25.819.819.2.dta   |
| GPSGVXSAQXLR 2 0 1 1 404  | 1 | 669.8036 | 1337.593 | 2 | 37.72 | 0.0013   | GPSGEVSAQLDK  | Phospho (ST) | 0.00000010000000 | AJC_synth_test_25.823.823.2.dta   |
| GPSGVXSAQXLR 4 0 4 0 809  | 1 | 618.7921 | 1235.57  | 2 | 41.46 | 0.00027  | GPSGGVLSAQLGR | Phospho (ST) | 0.00000010000000 | AJC_synth_test_25.824.824.2.dta   |
| GPSGVXSAQXLR 0 2 1 0 43   | 1 | 683.8058 | 1365.597 | 2 | 38.58 | 0.00091  | GPSGAVSEAQLDR | Phospho (ST) | 0.00000010000000 | AJC_synth_test_25.825.825.2.dta   |
| GPSGVXSAQXLR 1 0 1 0 203  | 1 | 676.7974 | 1351.58  | 2 | 25.08 | 0.02     | GPSGDVSAQLDR  | Phospho (ST) | 0.00000010000000 | AJC_synth_test_25.827.827.2.dta   |
| GPSGVXSAQXLR 2 2 2 0 445  | 1 | 719.816  | 1437.618 | 2 | 39.71 | 0.0014   | GPSGEVSEAQLER | Phospho (ST) | 0.00000010000000 | AJC_synth_test_25.839.839.2.dta   |
| GPSGVXSAQXLR 0 2 2 0 45   | 1 | 690.8132 | 1379.612 | 2 | 48.18 | 0.00017  | GPSGAVSEAQLER | Phospho (ST) | 0.00000010000000 | AJC_synth_test_25.847.847.2.dta   |
| GPSGVXSAQXLR 0 0 4 0 9    | 1 | 625.8002 | 1249.586 | 2 | 25.21 | 0.003    | GPSGAVSAQLGR  | Phospho (ST) | 0.00000010000000 | AJC_synth_test_25.849.849.2.dta   |
| GPSGVXSAQXLR 9 6 6 1 1934 | 1 | 680.8124 | 1359.61  | 2 | 47.45 | 0.00022  | GPSGVVSSAQLSK | Phospho (ST) | 0.00000010000000 | AJC_synth_test_25.855.855.2.dta   |
| GPSGVXSAQXLR 8 4 6 0 1693 | 1 | 647.8087 | 1293.603 | 2 | 41.11 | 0.00076  | GPSGVVSSAQLSR | Phospho (ST) | 0.0000           |                                   |

|                            |   |          |          |   |       |          |                 |              |                   |                                |
|----------------------------|---|----------|----------|---|-------|----------|-----------------|--------------|-------------------|--------------------------------|
| SXPFKXSPLXFGR 8 0 4 1 1610 | 1 | 707.8601 | 1413.706 | 2 | 20.75 | 0.035    | SVPFKASPLGFGK   | Phospho (ST) | 0.0000001000000.0 | Synth_pep_275V.1005.1005.2.dta |
| GPSGVXSQAQLXR 5 0 4 0 1009 | 1 | 646.8184 | 1291.622 | 2 | 53.7  | 2.20E-05 | GPSGLVSAQAQLGR  | Phospho (ST) | 0.0000001000000.0 | Synth_pep_275V.1008.1008.2.dta |
| SXPFKXSPLXFGR 6 0 1 1 1204 | 1 | 730.8448 | 1459.675 | 2 | 26.91 | 0.013    | SPPFKASPLDFGK   | Phospho (ST) | 0.0000001000000.0 | Synth_pep_275V.1009.1009.2.dta |
| SXPFKXSPLXFGR 0 7 9 1 160  | 1 | 761.8737 | 1521.733 | 2 | 24.91 | 0.015    | SAPFKTSPLYFGK   | Phospho (ST) | 0.0000001000000.0 | Synth_pep_275V.1011.1011.2.dta |
| SXPFKXSPLXFGR 0 2 9 0 59   | 1 | 789.8712 | 1577.728 | 2 | 43.82 | 0.00027  | SAPFKESPLYFGR   | Phospho (ST) | 0.0000001000000.0 | Synth_pep_275V.1012.1012.2.dta |
| GPSGVXSQAQLXR 3 0 4 1 610  | 1 | 649.8106 | 1297.607 | 2 | 44.39 | 0.00024  | GPSGVVSAQAQLGK  | Phospho (ST) | 0.0000001000000.0 | Synth_pep_275V.1013.1013.2.dta |
| GPSGVXSQAQLXR 9 8 4 0 1969 | 1 | 685.8262 | 1369.638 | 2 | 58.88 | 5.80E-06 | GPSGVVSAQAQLGR  | Phospho (ST) | 0.0000001000000.0 | Synth_pep_275V.1016.1016.2.dta |
| SXPFKXSPLXFGR 6 2 9 0 1259 | 1 | 797.8677 | 1593.721 | 2 | 31.79 | 0.00037  | SPPFKESPLYFGR   | Phospho (ST) | 0.0000001000000.0 | Synth_pep_275V.1017.1017.2.dta |
| GPSGVXSQAQLXR 8 8 4 0 1769 | 1 | 653.8292 | 1305.644 | 2 | 61.89 | 6.50E-07 | GPSGVVSAQAQLGR  | Phospho (ST) | 0.0000001000000.0 | Synth_pep_275V.1019.1019.2.dta |
| SXPFKXSPLXFGR 2 2 8 0 457  | 1 | 786.876  | 1571.738 | 2 | 35.99 | 0.0012   | SEFPKESPLVFGK   | Phospho (ST) | 0.0000001000000.0 | Synth_pep_275V.1020.1020.2.dta |
| GPSGVXSQAQLXR 1 4 3 1 288  | 1 | 671.805  | 1341.595 | 2 | 29.28 | 0.0087   | GPSGVVSAQAQLFK  | Phospho (ST) | 0.0000001000000.0 | Synth_pep_275V.1021.1021.2.dta |
| GPSGVXSQAQLXR 9 6 5 1 1932 | 1 | 693.8384 | 1385.662 | 2 | 33.79 | 0.0056   | GPSGVVSAQAQLK   | Phospho (ST) | 0.0000001000000.0 | Synth_pep_275V.1025.1025.2.dta |
| GPSGVXSQAQLXR 2 5 1 0 503  | 1 | 704.8275 | 1407.64  | 2 | 47.62 | 0.00011  | GPSGVEVSAQAQLDR | Phospho (ST) | 0.0000001000000.0 | Synth_pep_275V.1026.1026.2.dta |
| SXPFKXSPLXFGR 8 0 6 1 1614 | 1 | 722.8662 | 1443.718 | 2 | 29.95 | 0.0056   | SVPFKASPLDFGK   | Phospho (ST) | 0.0000001000000.0 | Synth_pep_275V.1028.1028.2.dta |
| GPSGVXSQAQLXR 0 5 2 1 1106 | 1 | 668.8298 | 1335.645 | 2 | 41.29 | 0.00043  | GPSGAVSLAQLKE   | Phospho (ST) | 0.0000001000000.0 | Synth_pep_275V.1032.1032.2.dta |
| GPSGVXSQAQLXR 3 0 4 0 609  | 1 | 663.8121 | 1325.61  | 2 | 43.41 | 0.00018  | GPSGVVSAQAQLGR  | Phospho (ST) | 0.0000001000000.0 | Synth_pep_275V.1033.1033.2.dta |
| GPSGVXSQAQLXR 5 4 8 0 1097 | 1 | 660.8374 | 1319.66  | 2 | 64.86 | 5.40E-07 | GPSGLVSAQAQLVR  | Phospho (ST) | 0.0000001000000.0 | Synth_pep_275V.1034.1034.2.dta |
| SXPFKXSPLXFGR 2 1 9 0 439  | 1 | 811.8659 | 1621.717 | 2 | 38.47 | 0.00046  | SEFPKDSPLYFGR   | Phospho (ST) | 0.0000001000000.0 | Synth_pep_275V.1036.1036.2.dta |
| SXPFKXSPLXFGR 2 2 9 0 459  | 1 | 818.8734 | 1635.732 | 2 | 23.36 | 0.012    | SEFPKESPLYFGR   | Phospho (ST) | 0.0000001000000.0 | Synth_pep_275V.1038.1038.2.dta |
| GPSGVXSQAQLXR 5 4 9 0 1099 | 1 | 692.8363 | 1383.658 | 2 | 32.73 | 0.0014   | GPSGLVSAQAQLYR  | Phospho (ST) | 0.0000001000000.0 | Synth_pep_275V.1040.1040.2.dta |
| GPSGVXSQAQLXR 9 8 2 0 1965 | 1 | 721.8383 | 1441.662 | 2 | 62.47 | 2.40E-06 | GPSGVVSAQAQLER  | Phospho (ST) | 0.0000001000000.0 | Synth_pep_275V.1042.1042.2.dta |
| GPSGVXSQAQLXR 3 4 9 1 700  | 1 | 695.8236 | 1389.633 | 2 | 48.14 | 9.20E-05 | GPSGVVSAQAQLYK  | Phospho (ST) | 0.0000001000000.0 | Synth_pep_275V.1044.1044.2.dta |
| GPSGVXSQAQLXR 8 8 2 0 1765 | 1 | 689.8401 | 1377.666 | 2 | 52.05 | 2.1E-05  | GPSGVVSAQAQLER  | Phospho (ST) | 0.0000001000000.0 | Synth_pep_275V.1045.1045.2.dta |
| GPSGVXSQAQLXR 5 1 8 1 1038 | 1 | 675.838  | 1349.662 | 2 | 39.32 | 0.00072  | GPSGLVSAQAQLVK  | Phospho (ST) | 0.0000001000000.0 | Synth_pep_275V.1048.1048.2.dta |
| SXPFKXSPLXFGR 9 0 0 1 1802 | 1 | 746.8657 | 1491.717 | 2 | 26.1  | 0.016    | SYPFKASPLAFGK   | Phospho (ST) | 0.0000001000000.0 | Synth_pep_275V.1049.1049.2.dta |
| SXPFKXSPLXFGR 0 2 5 1 52   | 1 | 750.879  | 1499.744 | 2 | 38.28 | 0.00082  | SAPFKESPLDFGK   | Phospho (ST) | 0.0000001000000.0 | Synth_pep_275V.1050.1050.2.dta |
| GPSGVXSQAQLXR 0 3 1 1 64   | 1 | 678.8127 | 1355.611 | 2 | 35.4  | 0.0029   | GPSGAVSFAQLDK   | Phospho (ST) | 0.0000001000000.0 | Synth_pep_275V.1052.1052.2.dta |
| GPSGVXSQAQLXR 1 3 1 0 263  | 1 | 714.8107 | 1427.607 | 2 | 25.29 | 0.0052   | GPSGVSFAQAQLDR  | Phospho (ST) | 0.0000001000000.0 | Synth_pep_275V.1053.1053.2.dta |
| SXPFKXSPLXFGR 1 6 1 0 323  | 1 | 766.8424 | 1531.67  | 2 | 41.15 | 0.00032  | SDFPKSSPLDFGK   | Phospho (ST) | 0.0000001000000.0 | Synth_pep_275V.1056.1056.2.dta |
| SXPFKXSPLXFGR 9 4 9 1 1900 | 1 | 785.8707 | 1569.727 | 2 | 22.71 | 0.025    | SYPFKGSPLYFGR   | Phospho (ST) | 0.0000001000000.0 | Synth_pep_275V.1057.1057.2.dta |
| GPSGVXSQAQLXR 4 3 4 0 869  | 1 | 656.806  | 1311.597 | 2 | 57    | 9.30E-06 | GPSGGVSFAQAQLGR | Phospho (ST) | 0.0000001000000.0 | Synth_pep_275V.1058.1058.2.dta |
| GPSGVXSQAQLXR 9 6 9 1 1940 | 1 | 800.8755 | 1599.736 | 2 | 23.55 | 0.011    | SYPFKGSPLYFGR   | Phospho (ST) | 0.0000001000000.0 | Synth_pep_275V.1060.1060.2.dta |
| GPSGVXSQAQLXR 0 5 2 0 105  | 1 | 682.8332 | 1363.652 | 2 | 24.26 | 0.018    | GPSGAVSLAQLER   | Phospho (ST) | 0.0000001000000.0 | Synth_pep_275V.1061.1061.2.dta |
| SXPFKXSPLXFGR 7 5 1 1 1504 | 1 | 758.8783 | 1515.742 | 2 | 25.34 | 0.016    | STPFKLSPLDFGK   | Phospho (ST) | 0.0000001000000.0 | Synth_pep_275V.1064.1064.2.dta |
| SXPFKXSPLXFGR 9 1 0 0 1821 | 1 | 782.8626 | 1563.711 | 2 | 31.94 | 0.0037   | SYPFKDSPLAFGR   | Phospho (ST) | 0.0000001000000.0 | Synth_pep_275V.1067.1067.2.dta |
| GPSGVXSQAQLXR 5 7 9 1 1160 | 1 | 700.8459 | 1399.677 | 2 | 43    | 0.00066  | GPSGLVSTAQLYK   | Phospho (ST) | 0.0000001000000.0 | Synth_pep_275V.1068.1068.2.dta |
| SXPFKXSPLXFGR 4 9 4 1 990  | 1 | 732.8501 | 1463.686 | 2 | 27.61 | 0.014    | SGPFKSPLYGFGK   | Phospho (ST) | 0.0000001000000.0 | Synth_pep_275V.1072.1072.2.dta |
| SXPFKXSPLXFGR 9 1 6 0 1833 | 1 | 790.8596 | 1579.705 | 2 | 40.15 | 0.00055  | SYPFKDSPLDFGK   | Phospho (ST) | 0.0000001000000.0 | Synth_pep_275V.1073.1073.2.dta |
| SXPFKXSPLXFGR 6 9 4 1 1390 | 1 | 747.854  | 1493.694 | 2 | 23.05 | 0.046    | SYPFKSPLDFGK    | Phospho (ST) | 0.0000001000000.0 | Synth_pep_275V.1074.1074.2.dta |
| SXPFKXSPLXFGR 9 2 9 1 1860 | 1 | 821.8812 | 1641.748 | 2 | 24.72 | 0.0034   | SYPFKESPLYFGR   | Phospho (ST) | 0.0000001000000.0 | Synth_pep_275V.1076.1076.2.dta |
| GPSGVXSQAQLXR 3 6 9 0 739  | 1 | 724.8314 | 1447.648 | 2 | 64.77 | 2.70E-06 | GPSGVVSAQAQLYR  | Phospho (ST) | 0.0000001000000.0 | Synth_pep_275V.1078.1078.2.dta |
| SXPFKXSPLXFGR 1 0 1 1 204  | 1 | 744.8427 | 1487.671 | 2 | 26.98 | 0.0096   | SDFPKASPLDFGK   | Phospho (ST) | 0.0000001000000.0 | Synth_pep_275V.1080.1080.2.dta |
| SXPFKXSPLXFGR 9 4 9 0 1899 | 1 | 799.8732 | 1597.732 | 2 | 39.42 | 0.00022  | SYPFKGSPLYFGR   | Phospho (ST) | 0.0000001000000.0 | Synth_pep_275V.1081.1081.2.dta |
| SXPFKXSPLXFGR 5 7 2 1 1146 | 1 | 765.8873 | 1529.76  | 2 | 20.37 | 0.022    | SLPKTSPLEFGR    | Phospho (ST) | 0.0000001000000.0 | Synth_pep_275V.1082.1082.2.dta |
| SXPFKXSPLXFGR 9 7 2 0 1945 | 1 | 804.8766 | 1607.739 | 2 | 25.81 | 0.011    | SYPFKTSPLEFGR   | Phospho (ST) | 0.0000001000000.0 | Synth_pep_275V.1084.1084.2.dta |
| SXPFKXSPLXFGR 5 6 2 0 1125 | 1 | 772.8793 | 1543.744 | 2 | 38.68 | 0.00077  | SLPKKSSPLEFGR   | Phospho (ST) | 0.0000001000000.0 | Synth_pep_275V.1089.1089.2.dta |
| SXPFKXSPLXFGR 2 2 5 0 451  | 1 | 793.8846 | 1585.755 | 2 | 43.45 | 0.00014  | SEFPKESPLDFGK   | Phospho (ST) | 0.0000001000000.0 | Synth_pep_275V.1090.1090.2.dta |
| SXPFKXSPLXFGR 9 1 9 1 1840 | 1 | 814.8734 | 1627.732 | 2 | 29.68 | 0.0013   | SYPFKDSPLYFGR   | Phospho (ST) | 0.0000001000000.0 | Synth_pep_275V.1091.1091.2.dta |
| SXPFKXSPLXFGR 6 9 4 0 1389 | 1 | 761.8574 | 1521.7   | 2 | 33.64 | 0.0018   | SEFPKSPLYGFGK   | Phospho (ST) | 0.0000001000000.0 | Synth_pep_275V.1096.1096.2.dta |
| SXPFKXSPLXFGR 0 9 2 0 185  | 1 | 789.871  | 1577.728 | 2 | 23.36 | 0.03     | SAPFKSPLDFGK    | Phospho (ST) | 0.0000001000000.0 | Synth_pep_275V.1097.1097.2.dta |
| GPSGVXSQAQLXR 4 0 3 1 808  | 1 | 649.8106 | 1297.607 | 2 | 45.04 | 0.00021  | GPSGVVSAQAQLFK  | Phospho (ST) | 0.0000001000000.0 | Synth_pep_275V.1100.1100.2.dta |
| GPSGVXSQAQLXR 3 7 9 1 760  | 1 | 717.8383 | 1433.662 | 2 | 34.12 | 0.0048   | GPSGVSFAQAQLYK  | Phospho (ST) | 0.0000001000000.0 | Synth_pep_275V.1101.1101.2.dta |
| SXPFKXSPLXFGR 9 0 9 1 1820 | 1 | 792.8785 | 1583.743 | 2 | 24.88 | 0.014    | SYPFKASPLYFGR   | Phospho (ST) | 0.0000001000000.0 | Synth_pep_275V.1104.1104.2.dta |
| SXPFKXSPLXFGR 6 9 2 0 1385 | 1 | 797.8673 | 1593.72  | 2 | 25.62 | 0.015    | SPPFKSPLYFGR    | Phospho (ST) | 0.0000001000000.0 | Synth_pep_275V.1107.1107.2.dta |
| SXPFKXSPLXFGR 9 7 9 1 1960 | 1 | 807.8838 | 1613.753 | 2 | 19.68 | 0.029    | SYPFKTSPLYFGR   | Phospho (ST) | 0.0000001000000.0 | Synth_pep_275V.1110.1110.2.dta |
| GPSGVXSQAQLXR 5 8 4 1 1170 | 1 | 646.8342 | 1291.654 | 2 | 56.45 | 1.20E-05 | GPSGLVSAQAQLGK  | Phospho (ST) | 0.0000001000000.0 | Synth_pep_275V.1113.1113.2.dta |
| GPSGVXSQAQLXR 9 6 3 1 1928 | 1 | 710.8292 | 1419.644 | 2 | 39.72 | 0.00088  | GPSGVVSAQAQLFK  | Phospho (ST) | 0.0000001000000.0 | Synth_pep_275V.1115.1115.2.dta |
| SXPFKXSPLXFGR 3 6 4 1 730  | 1 | 739.8573 | 1477.7   | 2 | 25.17 | 0.018    | SPPFKSPLDFGK    | Phospho (ST) | 0.0000001000000.0 | Synth_pep_275V.1117.1117.2.dta |
| SXPFKXSPLXFGR 5 1 2 0 1025 | 1 | 786.8767 | 1571.739 | 2 | 42.58 | 0.00036  | SLPKKDSPLDFGK   | Phospho (ST) | 0.0000001000000.0 | Synth_pep_275V.1121.1121.2.dta |
| GPSGVXSQAQLXR 9 5 6 1 1914 | 1 | 693.8373 | 1385.66  | 2 | 34.71 | 0.0041   | GPSGVVSAQAQLSK  | Phospho (ST) | 0.0000001000000.0 | Synth_pep_275V.1122.1122.2.dta |
| GPSGVXSQAQLXR 5 0 9 1 1020 | 1 | 685.8404 | 1369.666 | 2 | 39.84 | 0.00054  | GPSGLVSAQAQLYK  | Phospho (ST) | 0.0000001000000.0 | Synth_pep_275V.1123.1123.2.dta |
| SXPFKXSPLXFGR 2 9 2 0 585  | 1 | 818.8742 | 1635.734 | 2 | 34.08 | 0.001    | SEFPKSPLEFGR    | Phospho (ST) | 0.0000001000000.0 | Synth_pep_275V.1124.1124.2.dta |
| GPSGVXSQAQLXR 5 9 1 0 1183 | 1 | 721.838  | 1441.661 | 2 | 62.48 | 2.40E-06 | GPSGLVSAQAQLDR  | Phospho (ST) | 0.0000001000000.0 | Synth_pep_275V.1128.1128.2.dta |
| SXPFKXSPLXFGR 9 0 9 0 1819 | 1 | 806.8815 | 1611.748 | 2 | 35.68 | 0.00069  | SYPFKASPLYFGR   | Phospho (ST) | 0.0000001000000.0 | Synth_pep_275V.1129.1129.2.dta |
| GPSGVXSQAQLXR 5 0 8 1 1018 | 1 | 653.8425 | 1305.67  | 2 | 48.83 | 5.70E-05 | GPSGLVSAQAQLVK  | Phospho (ST) | 0.0000001000000.0 | Synth_pep_275V.1131.1131.2.dta |
| GPSGVXSQAQLXR 9 4 3 0 1887 | 1 | 709.8234 | 1417.632 | 2 | 82.34 | 5.20E-08 | GPSGVVSAQAQLFR  | Phospho (ST) | 0.0000001000000.0 | Synth_pep_275V.1132.1132.2.dta |
| GPSGVXSQAQLXR 5 8 1 0 1163 | 1 | 689.8405 | 1377.667 | 2 | 66.84 | 6.90E-07 | GPSGLVSAQAQLDR  | Phospho (ST) | 0.0000001000000.0 | Synth_pep_275V.1136.1136.2.dta |
| SXPFKXSPLXFGR 7 8 1 1 1564 | 1 | 751.8691 | 1501.724 | 2 | 31.21 | 0.0033   | STPFKSPLYDFGK   | Phospho (ST) | 0.0000001000000.0 | Synth_pep_275V.1138.1138.2.dta |
| GPSGVXSQAQLXR 4 9 5 1 1992 | 1 | 678.8322 | 1355.65  | 2 | 33.85 | 0.0025   | GPSGGVSQAQLK    | Phospho (ST) | 0.0000001000000.0 | Synth_pep_275V.1139.1139.2.dta |
| SXPFKXSPLXFGR 9 8 0 0 1961 | 1 | 774.885  | 1547.756 | 2 | 32.03 | 0.0017   | SYPFKVSPLAFGR   | Phospho (ST) | 0.0000001000000.0 | Synth_pep_275V.1140.1140.2.dta |
| GPSGVXSQAQLXR 5 8 4 0 1169 | 1 | 660.8376 | 1319.661 | 2 | 59.38 | 1.90E-06 | GPSGLVSAQAQLGR  | Phospho (ST) | 0.0000001000000.0 | Synth_pep_275V.1141.1141.2.dta |
| GPSGVXSQAQLXR 8 5 1 1 1704 | 1 | 675.8375 | 1349.661 | 2 | 52.8  | 3.20E-05 | GPSGVVSAQAQLDK  | Phospho (ST) | 0.0000001000000.0 | Synth_pep_275V.1142.1142.2.dta |
| GPSGVXSQAQLXR 3 8 1 1 764  | 1 | 692.8297 | 1383.645 | 2 | 34.66 | 0.0022   | GPSGFVSAQAQLDK  | Phospho (ST) | 0.0000001000000.0 | Synth_pep_275V.1144.1144.2.dta |
| GPSGVXSQAQLXR 5 0 9 0 1019 | 1 | 699.8423 | 1397.67  | 2 | 53.2  | 2.20E-05 | GPSGLVSAQAQLYR  | Phospho (ST) | 0.0000001000000.0 | Synth_pep_275V.1145.1145.2.dta |
| SXPFKXSPLXFGR 2 9 1 0 583  | 1 | 811.8657 | 1621.717 | 2 | 23.41 | 0.015    | SEFPKSPLYDFGK   | Phospho (ST) | 0.0000001000000.0 | Synth_pep_275V.1146.1146.2.dta |
| GPSGVXSQAQLXR 5 6 5 1 1132 | 1 | 668.8475 | 1335.681 | 2 | 50.53 | 5.40E-05 | GPSGLVSAQAQLK   | Phospho (ST) | 0.0000001000000.0 | Synth_pep_275V.1147.1147.2.dta |
| SXPFKXSPLXFGR 8 9 2 0 1785 | 1 | 803.8875 | 1605.76  | 2 | 30.22 | 0.0045   | SVPFKSPLDFGK    | Phospho (ST) | 0.0000001000000.0 | Synth_pep_275V.1148.1148.2.dta |
| GPSGVXSQAQLXR 9 3 1 0 1863 | 1 | 738.8287 | 14       |   |       |          |                 |              |                   |                                |

|               |         |       |   |          |          |   |       |          |                |              |                   |                                |
|---------------|---------|-------|---|----------|----------|---|-------|----------|----------------|--------------|-------------------|--------------------------------|
| SXPFKXSPLXFG  | 9 9 9 1 | 2000  | 1 | 838.8912 | 1675.768 | 2 | 24    | 0.0072   | SYPFKYSPLVFGK  | Phospho (ST) | 0.0000001000000.0 | Synth_pep_275V.1197.1197.2.dta |
| GPSGVXSQAQLXR | 9 3 0 1 | 1862  | 1 | 702.8321 | 1403.65  | 2 | 45.22 | 0.00028  | GPSGVVSFAQLAK  | Phospho (ST) | 0.0000001000000.0 | Synth_pep_275V.1202.1202.2.dta |
| GPSGVXSQAQLXR | 4 8 5 1 | 1972  | 1 | 646.8343 | 1291.654 | 2 | 59.58 | 5.70E-06 | GPSGVVSVAQLLK  | Phospho (ST) | 0.0000001000000.0 | Synth_pep_275V.1204.1204.2.dta |
| SXPFKXSPLXFG  | 1 5 1 5 | 1032  | 1 | 764.8979 | 1527.781 | 2 | 23.81 | 0.017    | SLPFKDSPLFVGK  | Phospho (ST) | 0.0000001000000.0 | Synth_pep_275V.1206.1206.2.dta |
| SXPFKXSPLXFG  | 1 9 9 0 | 1839  | 1 | 828.8768 | 1655.739 | 2 | 25.48 | 0.0069   | SYPFKDSPLVFGK  | Phospho (ST) | 0.0000001000000.0 | Synth_pep_275V.1208.1208.2.dta |
| SXPFKXSPLXFG  | 1 9 3 7 | 11876 | 1 | 717.838  | 1433.661 | 2 | 33.02 | 0.0066   | GPSGVVSFAQLTK  | Phospho (ST) | 0.0000001000000.0 | Synth_pep_275V.1210.1210.2.dta |
| SXPFKXSPLXFG  | 1 9 9 0 | 1999  | 1 | 852.8953 | 1703.776 | 2 | 24.25 | 0.0038   | SYPFKYSPLVFGK  | Phospho (ST) | 0.0000001000000.0 | Synth_pep_275V.1213.1213.2.dta |
| SXPFKXSPLXFG  | 3 2 9 1 | 1660  | 1 | 813.885  | 1625.756 | 2 | 16.97 | 0.03     | SFPFKESPLVFGK  | Phospho (ST) | 0.0000001000000.0 | Synth_pep_275V.1214.1214.2.dta |
| SXPFKXSPLXFG  | 7 8 0 0 | 1561  | 1 | 743.8749 | 1485.735 | 2 | 26.89 | 0.0095   | STPFKYSPLAFGR  | Phospho (ST) | 0.0000001000000.0 | Synth_pep_275V.1216.1216.2.dta |
| SXPFKXSPLXFG  | 3 1 9 1 | 1640  | 1 | 806.8752 | 1611.736 | 2 | 17.32 | 0.031    | SFPFKDSPLVFGK  | Phospho (ST) | 0.0000001000000.0 | Synth_pep_275V.1217.1217.2.dta |
| GPSGVXSQAQLXR | 0 5 8 1 | 1118  | 1 | 653.8419 | 1305.669 | 2 | 43.72 | 0.00018  | GPSGAVSQAQLVK  | Phospho (ST) | 0.0000001000000.0 | Synth_pep_275V.1218.1218.2.dta |
| GPSGVXSQAQLXR | 3 8 7 1 | 1776  | 1 | 685.8397 | 1369.665 | 2 | 35.44 | 0.0017   | GPSGFVSAQLTK   | Phospho (ST) | 0.0000001000000.0 | Synth_pep_275V.1220.1220.2.dta |
| GPSGVXSQAQLXR | 9 0 3 1 | 1808  | 1 | 784.8811 | 1567.748 | 2 | 22.54 | 0.015    | SYPFKDSPLFVGK  | Phospho (ST) | 0.0000001000000.0 | Synth_pep_275V.1224.1224.2.dta |
| SXPFKXSPLXFG  | 6 5 4 0 | 1309  | 1 | 736.8671 | 1471.72  | 2 | 21.11 | 0.03     | SDPFKDSPLFVGK  | Phospho (ST) | 0.0000001000000.0 | Synth_pep_275V.1225.1225.2.dta |
| GPSGVXSQAQLXR | 4 9 3 1 | 1988  | 1 | 695.8235 | 1389.633 | 2 | 25.13 | 0.018    | GPSGVVSQAQLFK  | Phospho (ST) | 0.0000001000000.0 | Synth_pep_275V.1228.1228.2.dta |
| GPSGVXSQAQLXR | 3 1 8 0 | 637   | 1 | 706.8287 | 1411.643 | 2 | 52.09 | 1.40E-05 | GPSGVSDAQLVR   | Phospho (ST) | 0.0000001000000.0 | Synth_pep_275V.1229.1229.2.dta |
| SXPFKXSPLXFG  | 7 5 2 0 | 1505  | 1 | 779.8867 | 1557.759 | 2 | 24.53 | 0.016    | STPFKDSPLFVGK  | Phospho (ST) | 0.0000001000000.0 | Synth_pep_275V.1232.1232.2.dta |
| GPSGVXSQAQLXR | 5 7 5 0 | 1151  | 1 | 689.8597 | 1377.705 | 2 | 62.04 | 2.40E-06 | GPSGLVSTAQLLR  | Phospho (ST) | 0.0000001000000.0 | Synth_pep_275V.1233.1233.2.dta |
| GPSGVXSQAQLXR | 3 7 5 1 | 1752  | 1 | 692.8481 | 1383.682 | 2 | 49.95 | 4.70E-05 | GPSGFVSTAQLLK  | Phospho (ST) | 0.0000001000000.0 | Synth_pep_275V.1234.1234.2.dta |
| GPSGVXSQAQLXR | 8 3 7 0 | 1675  | 1 | 699.8405 | 1397.667 | 2 | 66.73 | 1.10E-06 | GPSGVVSFAQLTR  | Phospho (ST) | 0.0000001000000.0 | Synth_pep_275V.1235.1235.2.dta |
| GPSGVXSQAQLXR | 0 8 8 0 | 177   | 1 | 660.8367 | 1319.659 | 2 | 51.1  | 1.00E-05 | GPSGAVSQAQLVR  | Phospho (ST) | 0.0000001000000.0 | Synth_pep_275V.1237.1237.2.dta |
| GPSGVXSQAQLXR | 4 9 3 0 | 1987  | 1 | 709.8256 | 1417.637 | 2 | 75.8  | 1.70E-07 | GPSGVVSQAQLFR  | Phospho (ST) | 0.0000001000000.0 | Synth_pep_275V.1245.1245.2.dta |
| SXPFKXSPLXFG  | 6 5 9 1 | 1320  | 1 | 775.8887 | 1549.763 | 2 | 19.6  | 0.033    | SDPFKDSPLVFGK  | Phospho (ST) | 0.0000001000000.0 | Synth_pep_275V.1248.1248.2.dta |
| GPSGVXSQAQLXR | 5 4 3 0 | 1087  | 1 | 684.837  | 1367.66  | 2 | 43.45 | 0.00019  | GPSGLVSGAQLFR  | Phospho (ST) | 0.0000001000000.0 | Synth_pep_275V.1250.1250.2.dta |
| SXPFKXSPLXFG  | 8 5 4 1 | 1710  | 1 | 728.884  | 1455.754 | 2 | 28.3  | 0.0067   | SVPFKDSPLFVGK  | Phospho (ST) | 0.0000001000000.0 | Synth_pep_275V.1250.1250.2.dta |
| SXPFKXSPLXFG  | 0 9 3 0 | 187   | 1 | 798.884  | 1595.754 | 2 | 30.5  | 0.0012   | SAPFKYSPLFVGK  | Phospho (ST) | 0.0000001000000.0 | Synth_pep_275V.1252.1252.2.dta |
| SXPFKXSPLXFG  | 6 9 3 1 | 1388  | 1 | 792.8783 | 1583.742 | 2 | 22.31 | 0.029    | SDPFKYSPLFVGK  | Phospho (ST) | 0.0000001000000.0 | Synth_pep_275V.1254.1254.2.dta |
| SXPFKXSPLXFG  | 0 1 5 0 | 31    | 1 | 757.8716 | 1513.729 | 2 | 32.86 | 0.0045   | SAPFKDSPLFVGK  | Phospho (ST) | 0.0000001000000.0 | Synth_pep_275V.1256.1256.2.dta |
| SXPFKXSPLXFG  | 4 3 4 0 | 869   | 1 | 738.8557 | 1475.697 | 2 | 49.07 | 4.10E-05 | SGPFKDSPLFVGK  | Phospho (ST) | 0.0000001000000.0 | Synth_pep_275V.1257.1257.2.dta |
| SXPFKXSPLXFG  | 6 3 6 1 | 1274  | 1 | 754.8629 | 1507.711 | 2 | 22.63 | 0.047    | SDPFKDSPLFVGK  | Phospho (ST) | 0.0000001000000.0 | Synth_pep_275V.1258.1258.2.dta |
| SXPFKXSPLXFG  | 7 5 1 0 | 1503  | 1 | 772.8771 | 1543.74  | 2 | 23.89 | 0.03     | STPFKDSPLDFGR  | Phospho (ST) | 0.0000001000000.0 | Synth_pep_275V.1259.1259.2.dta |
| GPSGVXSQAQLXR | 9 5 9 1 | 1920  | 1 | 731.854  | 1461.694 | 2 | 31.51 | 0.0047   | GPSGVVLSAQLYK  | Phospho (ST) | 0.0000001000000.0 | Synth_pep_275V.1260.1260.2.dta |
| SXPFKXSPLXFG  | 0 5 8 0 | 117   | 1 | 749.895  | 1497.775 | 2 | 25.81 | 0.0039   | SAPFKDSPLVFGK  | Phospho (ST) | 0.0000001000000.0 | Synth_pep_275V.1261.1261.2.dta |
| GPSGVXSQAQLXR | 9 0 3 0 | 1807  | 1 | 716.8348 | 1431.655 | 2 | 57.33 | 9.70E-06 | GPSGVVSQAQLFR  | Phospho (ST) | 0.0000001000000.0 | Synth_pep_275V.1262.1262.2.dta |
| GPSGVXSQAQLXR | 5 5 1 1 | 1104  | 1 | 682.8445 | 1363.675 | 2 | 50.42 | 5.00E-05 | GPSGLVLSAQLDK  | Phospho (ST) | 0.0000001000000.0 | Synth_pep_275V.1264.1264.2.dta |
| SXPFKXSPLXFG  | 5 9 1 0 | 1183  | 1 | 803.8865 | 1605.759 | 2 | 24.46 | 0.017    | SLPFKYSPLDFGR  | Phospho (ST) | 0.0000001000000.0 | Synth_pep_275V.1265.1265.2.dta |
| SXPFKXSPLXFG  | 2 3 2 1 | 1466  | 1 | 796.8713 | 1591.728 | 2 | 18.84 | 0.02     | SEPFKDSPLFVGK  | Phospho (ST) | 0.0000001000000.0 | Synth_pep_275V.1266.1266.2.dta |
| SXPFKXSPLXFG  | 6 3 0 0 | 1261  | 1 | 760.868  | 1519.721 | 2 | 31.16 | 0.0018   | SDPFKDSPLAFGR  | Phospho (ST) | 0.0000001000000.0 | Synth_pep_275V.1272.1272.2.dta |
| SXPFKXSPLXFG  | 2 5 1 0 | 503   | 1 | 786.8765 | 1571.739 | 2 | 24.53 | 0.017    | SEPFKDSPLDFGR  | Phospho (ST) | 0.0000001000000.0 | Synth_pep_275V.1273.1273.2.dta |
| SXPFKXSPLXFG  | 2 3 0 0 | 461   | 1 | 781.871  | 1561.728 | 2 | 35.78 | 0.00091  | SEPFKDSPLAFGR  | Phospho (ST) | 0.0000001000000.0 | Synth_pep_275V.1274.1274.2.dta |
| GPSGVXSQAQLXR | 3 4 3 0 | 687   | 1 | 701.8296 | 1401.645 | 2 | 47.71 | 3.00E-05 | GPSGVVSQAQLFR  | Phospho (ST) | 0.0000001000000.0 | Synth_pep_275V.1275.1275.2.dta |
| SXPFKXSPLXFG  | 5 8 2 0 | 1165  | 1 | 778.8984 | 1555.782 | 2 | 29.65 | 0.0039   | SLPFKYSPLFVGK  | Phospho (ST) | 0.0000001000000.0 | Synth_pep_275V.1276.1276.2.dta |
| GPSGVXSQAQLXR | 5 8 9 0 | 1179  | 1 | 713.8592 | 1425.704 | 2 | 55.66 | 5.70E-06 | GPSGLVVSQAQLYR | Phospho (ST) | 0.0000001000000.0 | Synth_pep_275V.1277.1277.2.dta |
| GPSGVXSQAQLXR | 9 5 9 0 | 1919  | 1 | 745.8553 | 1489.696 | 2 | 32.75 | 0.0022   | GPSGVVLSAQLYR  | Phospho (ST) | 0.0000001000000.0 | Synth_pep_275V.1280.1280.2.dta |
| GPSGVXSQAQLXR | 5 5 1 0 | 1103  | 1 | 696.8484 | 1391.682 | 2 | 62.74 | 3.20E-06 | GPSGLVLSAQLDR  | Phospho (ST) | 0.0000001000000.0 | Synth_pep_275V.1281.1281.2.dta |
| GPSGVXSQAQLXR | 5 3 4 1 | 1070  | 1 | 670.8344 | 1339.654 | 2 | 31.32 | 0.0066   | GPSGLVLSAQLGK  | Phospho (ST) | 0.0000001000000.0 | Synth_pep_275V.1282.1282.2.dta |
| SXPFKXSPLXFG  | 8 5 7 0 | 1715  | 1 | 764.8996 | 1527.785 | 2 | 32.05 | 0.00097  | SVPFKDSPLTFGR  | Phospho (ST) | 0.0000001000000.0 | Synth_pep_275V.1283.1283.2.dta |
| SXPFKXSPLXFG  | 2 3 2 0 | 465   | 1 | 810.8732 | 1619.732 | 2 | 30.11 | 0.0018   | SEPFKDSPLFVGK  | Phospho (ST) | 0.0000001000000.0 | Synth_pep_275V.1284.1284.2.dta |
| GPSGVXSQAQLXR | 4 8 3 1 | 1968  | 1 | 663.8265 | 1325.639 | 2 | 54.64 | 2.60E-05 | GPSGVVSQAQLFK  | Phospho (ST) | 0.0000001000000.0 | Synth_pep_275V.1285.1285.2.dta |
| SXPFKXSPLXFG  | 9 5 6 0 | 1913  | 1 | 789.893  | 1577.772 | 2 | 32.37 | 0.0013   | SYPFKDSPLFVGK  | Phospho (ST) | 0.0000001000000.0 | Synth_pep_275V.1288.1288.2.dta |
| GPSGVXSQAQLXR | 5 5 4 0 | 1109  | 1 | 667.8453 | 1333.676 | 2 | 64.89 | 6.30E-07 | GPSGLVLSAQLGR  | Phospho (ST) | 0.0000001000000.0 | Synth_pep_275V.1290.1290.2.dta |
| GPSGVXSQAQLXR | 3 8 9 0 | 1779  | 1 | 730.8495 | 1459.685 | 2 | 24.74 | 0.014    | GPSGFVSAQLYR   | Phospho (ST) | 0.0000001000000.0 | Synth_pep_275V.1292.1292.2.dta |
| SXPFKXSPLXFG  | 6 3 1 1 | 1264  | 1 | 768.8618 | 1535.709 | 2 | 24.96 | 0.027    | SDPFKDSPLDFGK  | Phospho (ST) | 0.0000001000000.0 | Synth_pep_275V.1296.1296.2.dta |
| SXPFKXSPLXFG  | 3 9 1 1 | 1784  | 1 | 806.8797 | 1611.745 | 2 | 27.88 | 0.0066   | SFPFKYSPLDFGK  | Phospho (ST) | 0.0000001000000.0 | Synth_pep_275V.1297.1297.2.dta |
| SXPFKXSPLXFG  | 3 9 9 1 | 180   | 1 | 830.8944 | 1659.774 | 2 | 17.11 | 0.044    | SFPFKYSPLVFGK  | Phospho (ST) | 0.0000001000000.0 | Synth_pep_275V.1298.1298.2.dta |
| GPSGVXSQAQLXR | 3 0 5 1 | 1612  | 1 | 677.8421 | 1353.67  | 2 | 39.97 | 0.00068  | GPSGVVSQAQLVK  | Phospho (ST) | 0.0000001000000.0 | Synth_pep_275V.1301.1301.2.dta |
| SXPFKXSPLXFG  | 5 8 1 0 | 1163  | 1 | 771.8903 | 1541.766 | 2 | 47.22 | 9.00E-05 | SLPFKYSPLDFGK  | Phospho (ST) | 0.0000001000000.0 | Synth_pep_275V.1304.1304.2.dta |
| SXPFKXSPLXFG  | 9 3 4 1 | 1870  | 1 | 777.8743 | 1553.734 | 2 | 19.87 | 0.037    | SYPFKDSPLFVGK  | Phospho (ST) | 0.0000001000000.0 | Synth_pep_275V.1305.1305.2.dta |
| SXPFKXSPLXFG  | 0 1 3 0 | 27    | 1 | 774.8632 | 1547.712 | 2 | 19.45 | 0.049    | SAPFKDSPLFVGK  | Phospho (ST) | 0.0000001000000.0 | Synth_pep_275V.1306.1306.2.dta |
| GPSGVXSQAQLXR | 5 0 5 0 | 1011  | 1 | 674.8535 | 1347.962 | 2 | 84.93 | 3.20E-09 | GPSGLVVSQAQLLR | Phospho (ST) | 0.0000001000000.0 | Synth_pep_275V.1308.1308.2.dta |
| GPSGVXSQAQLXR | 5 7 3 0 | 1147  | 1 | 706.8472 | 1411.68  | 2 | 58.68 | 7.10E-06 | GPSGLVSTAQLFR  | Phospho (ST) | 0.0000001000000.0 | Synth_pep_275V.1310.1310.2.dta |
| SXPFKXSPLXFG  | 0 3 8 0 | 77    | 1 | 766.8882 | 1531.762 | 2 | 22.53 | 0.01     | SAPFKDSPLVFGK  | Phospho (ST) | 0.0000001000000.0 | Synth_pep_275V.1312.1312.2.dta |
| GPSGVXSQAQLXR | 3 5 2 0 | 705   | 1 | 720.8477 | 1439.681 | 2 | 51.58 | 2.10E-05 | GPSGFVLSAQLER  | Phospho (ST) | 0.0000001000000.0 | Synth_pep_275V.1313.1313.2.dta |
| GPSGVXSQAQLXR | 3 3 4 1 | 1670  | 1 | 687.8262 | 1373.638 | 2 | 42.53 | 0.0004   | GPSGFVSAQLGK   | Phospho (ST) | 0.0000001000000.0 | Synth_pep_275V.1314.1314.2.dta |
| GPSGVXSQAQLXR | 3 3 2 1 | 1666  | 1 | 723.8372 | 1445.66  | 2 | 33.28 | 0.0033   | GPSGFVSAQLGK   | Phospho (ST) | 0.0000001000000.0 | Synth_pep_275V.1315.1315.2.dta |
| SXPFKXSPLXFG  | 9 9 3 0 | 1987  | 1 | 844.8974 | 1687.78  | 2 | 34.24 | 0.00062  | SYPFKYSPLFVGK  | Phospho (ST) | 0.0000001000000.0 | Synth_pep_275V.1316.1316.2.dta |
| SXPFKXSPLXFG  | 5 2 3 0 | 1047  | 1 | 802.8975 | 1607.78  | 2 | 17.37 | 0.046    | SLPFKESPLDFGK  | Phospho (ST) | 0.0000001000000.0 | Synth_pep_275V.1317.1317.2.dta |
| GPSGVXSQAQLXR | 9 5 8 1 | 1918  | 1 | 699.8561 | 1393.698 | 2 | 38.52 | 0.0007   | GPSGVVLSAQLVK  | Phospho (ST) | 0.0000001000000.0 | Synth_pep_275V.1320.1320.2.dta |
| GPSGVXSQAQLXR | 5 5 0 1 | 1102  | 1 | 660.8503 | 1319.686 | 2 | 51.58 | 2.30E-05 | GPSGLVLSAQLAK  | Phospho (ST) | 0.0000001000000.0 | Synth_pep_275V.1321.1321.2.dta |
| SXPFKXSPLXFG  | 3 8 2 0 | 765   | 1 | 795.8864 | 1589.758 | 2 | 31.7  | 0.0025   | SFPFKYSPLFVGK  | Phospho (ST) | 0.0000001000000.0 | Synth_pep_275V.1322.1322.2.dta |
| SXPFKXSPLXFG  | 1 5 1 0 | 303   | 1 | 779.8693 | 1557.724 | 2 | 36.71 | 0.0017   | SDPFKDSPLDFGR  | Phospho (ST) | 0.0000001000000.0 | Synth_pep_275V.1328.1328.2.dta |
| GPSGVXSQAQLXR | 3 0 5 0 | 611   | 1 | 691.8452 | 1381.676 | 2 | 53.93 | 6.10E-06 | GPSGFVVSQAQLLR | Phospho (ST) | 0.0000001000000.0 | Synth_pep_275V.1329.1329.2.dta |
| GPSGVXSQAQLXR | 6 5 5 1 | 1312  | 1 | 668.8475 | 1335.681 | 2 | 34.38 | 0.0022   | GPSGVVLSAQLLK  | Phospho (ST) | 0.0000001000000.0 | Synth_pep_275V.1330.1330.2.dta |
| SXPFKXSPLXFG  | 5 8 8 0 | 1177  | 1 | 763.9107 | 1525.807 | 2 | 33.74 | 0.00042  | SLPFKYSPLVFGK  | Phospho (ST) | 0.0000001000000.0 | Synth_pep_275V.1331.1331.2.dta |

|                |         |       |   |            |          |   |       |          |               |              |                   |                                |
|----------------|---------|-------|---|------------|----------|---|-------|----------|---------------|--------------|-------------------|--------------------------------|
| SXPFKXSLXFLFGR | 5 3 0 0 | 1061  | 1 | 773.8948   | 1545.775 | 2 | 42.01 | 6.30E-05 | SLPFKFSPLAFGR | Phospho (ST) | 0.0000001000000.0 | Synth_pep_275V.1393.1393.2.dta |
| SXPFKXSLXFLFGR | 5 5 1 0 | 1103  | 1 | 778.8975   | 1555.781 | 2 | 29.11 | 0.0044   | SLPFKLSPLDFGR | Phospho (ST) | 0.0000001000000.0 | Synth_pep_275V.1394.1394.2.dta |
| GPSGVXSAQQLXR  | 0 5 5 0 | 111   | 1 | 674.8522   | 1347.69  | 2 | 64.56 | 3.50E-07 | GPSGAVSLAQLLR | Phospho (ST) | 0.0000001000000.0 | Synth_pep_275V.1397.1397.2.dta |
| GPSGVXSAQQLXR  | 3 5 9 1 | 1720  | 1 | 723.8557   | 1445.697 | 2 | 47.78 | 9.50E-05 | GPSGFVSLAQLYK | Phospho (ST) | 0.0000001000000.0 | Synth_pep_275V.1400.1400.2.dta |
| SXPFKXSLXFLFGR | 6 3 3 1 | 1268  | 1 | 784.8817   | 1567.749 | 2 | 19.16 | 0.032    | SXPFKFSPLFFGK | Phospho (ST) | 0.0000001000000.0 | Synth_pep_275V.1401.1401.2.dta |
| GPSGVXSAQQLXR  | 9 8 3 1 | 11968 | 1 | 716.8479   | 1431.681 | 2 | 52.83 | 3.40E-05 | GPSGFVSAQLFK  | Phospho (ST) | 0.0000001000000.0 | Synth_pep_275V.1402.1402.2.dta |
| SXPFKXSLXFLFGR | 5 8 5 0 | 1171  | 1 | 770.919    | 1539.824 | 2 | 17.65 | 0.017    | SLPFKVSPLLFGR | Phospho (ST) | 0.0000001000000.0 | Synth_pep_275V.1403.1403.2.dta |
| GPSGVXSAQQLXR  | 5 5 9 0 | 11119 | 1 | 720.8667   | 1439.719 | 2 | 65.74 | 5.60E-07 | GPSGLVSLAQLYR | Phospho (ST) | 0.0000001000000.0 | Synth_pep_275V.1408.1408.2.dta |
| SXPFKXSLXFLFGR | 3 5 2 0 | 705   | 1 | 802.8961   | 1603.778 | 2 | 23.45 | 0.014    | SXPFKLSPLFGR  | Phospho (ST) | 0.0000001000000.0 | Synth_pep_275V.1409.1409.2.dta |
| SXPFKXSLXFLFGR | 3 5 4 0 | 709   | 1 | 766.8874   | 1531.76  | 2 | 17.09 | 0.035    | SXPFKLSPLFGR  | Phospho (ST) | 0.0000001000000.0 | Synth_pep_275V.1410.1410.2.dta |
| GPSGVXSAQQLXR  | 6 5 3 0 | 1307  | 1 | 699.8423   | 1397.67  | 2 | 66.9  | 9.20E-07 | GPSGVSLAQLFR  | Phospho (ST) | 0.0000001000000.0 | Synth_pep_275V.1416.1416.2.dta |
| GPSGVXSAQQLXR  | 4 5 3 1 | 1908  | 1 | 670.8345   | 1339.654 | 2 | 55.79 | 2.40E-05 | GPSGGVSLAQLFK | Phospho (ST) | 0.0000001000000.0 | Synth_pep_275V.1417.1417.2.dta |
| SXPFKXSLXFLFGR | 3 3 0 1 | 1662  | 1 | 776.8844   | 1551.754 | 2 | 27.31 | 0.002    | SXPFKFSPLAFGK | Phospho (ST) | 0.0000001000000.0 | Synth_pep_275V.1418.1418.2.dta |
| GPSGVXSAQQLXR  | 3 3 9 1 | 1680  | 1 | 740.8474   | 1479.68  | 2 | 41.42 | 0.00071  | GPSGFVSAQLYK  | Phospho (ST) | 0.0000001000000.0 | Synth_pep_275V.1419.1419.2.dta |
| SXPFKXSLXFLFGR | 6 3 3 0 | 1267  | 1 | 798.8836   | 1595.753 | 2 | 20.87 | 0.011    | SXPFKFSPLFFGR | Phospho (ST) | 0.0000001000000.0 | Synth_pep_275V.1424.1424.2.dta |
| SXPFKXSLXFLFGR | 3 3 4 1 | 1670  | 1 | 769.8773   | 1537.74  | 2 | 13.49 | 0.045    | SXPFKFSPLFGK  | Phospho (ST) | 0.0000001000000.0 | Synth_pep_275V.1425.1425.2.dta |
| GPSGVXSAQQLXR  | 3 3 9 0 | 1679  | 1 | 754.8513   | 1507.688 | 2 | 62.46 | 2.30E-06 | GPSGFVSAQLYR  | Phospho (ST) | 0.0000001000000.0 | Synth_pep_275V.1432.1432.2.dta |
| GPSGVXSAQQLXR  | 4 3 3 1 | 1868  | 1 | 687.827    | 1373.64  | 2 | 50.76 | 6.00E-05 | GPSGGVSAQLFK  | Phospho (ST) | 0.0000001000000.0 | Synth_pep_275V.1433.1433.2.dta |
| GPSGVXSAQQLXR  | 5 3 8 1 | 11078 | 1 | 691.8582   | 1381.702 | 2 | 51.88 | 3.50E-05 | GPSGLVSAQLVK  | Phospho (ST) | 0.0000001000000.0 | Synth_pep_275V.1440.1440.2.dta |
| SXPFKXSLXFLFGR | 5 3 8 0 | 1077  | 1 | 787.9109   | 1573.807 | 2 | 22.79 | 0.0053   | SLPFKFSPLFVGR | Phospho (ST) | 0.0000001000000.0 | Synth_pep_275V.1441.1441.2.dta |
| SXPFKXSLXFLFGR | 3 3 0 0 | 1661  | 1 | 790.8867   | 1579.759 | 2 | 33.55 | 0.00055  | SXPFKFSPLAFGR | Phospho (ST) | 0.0000001000000.0 | Synth_pep_275V.1442.1442.2.dta |
| GPSGVXSAQQLXR  | 8 8 3 0 | 11767 | 1 | 698.8526   | 1395.691 | 2 | 56.46 | 2.40E-06 | GPSGVVSAQLFR  | Phospho (ST) | 0.0000001000000.0 | Synth_pep_275V.1443.1443.2.dta |
| GPSGVXSAQQLXR  | 1 5 3 0 | 307   | 1 | 713.8401   | 1425.666 | 2 | 53.8  | 1.30E-05 | GPSGDVSLAQLFR | Phospho (ST) | 0.0000001000000.0 | Synth_pep_275V.1445.1445.2.dta |
| GPSGVXSAQQLXR  | 5 3 8 0 | 1077  | 1 | 705.8608   | 1409.707 | 2 | 47.68 | 2.00E-05 | GPSGLVSAQLVR  | Phospho (ST) | 0.0000001000000.0 | Synth_pep_275V.1456.1456.2.dta |
| GPSGVXSAQQLXR  | 3 3 8 1 | 1678  | 1 | 708.8499   | 1415.685 | 2 | 40.8  | 0.00068  | GPSGFVSAQLVK  | Phospho (ST) | 0.0000001000000.0 | Synth_pep_275V.1457.1457.2.dta |
| GPSGVXSAQQLXR  | 1 3 3 0 | 267   | 1 | 730.8317   | 1459.649 | 2 | 50.66 | 2.80E-05 | GPSGDVSAQLFR  | Phospho (ST) | 0.0000001000000.0 | Synth_pep_275V.1458.1458.2.dta |
| GPSGVXSAQQLXR  | 4 3 3 0 | 867   | 1 | 701.8298   | 1401.645 | 2 | 77.17 | 3.50E-08 | GPSGGVSAQLFR  | Phospho (ST) | 0.0000001000000.0 | Synth_pep_275V.1459.1459.2.dta |
| GPSGVXSAQQLXR  | 0 3 3 1 | 168   | 1 | 694.8339   | 1387.653 | 2 | 22.81 | 0.04     | GPSGAVSAQLFK  | Phospho (ST) | 0.0000001000000.0 | Synth_pep_275V.1461.1461.2.dta |
| SXPFKXSLXFLFGR | 9 3 3 0 | 1867  | 1 | 836.9005   | 1671.787 | 2 | 29.66 | 0.0016   | SXPFKFSPLFFGR | Phospho (ST) | 0.0000001000000.0 | Synth_pep_275V.1464.1464.2.dta |
| GPSGVXSAQQLXR  | 2 3 3 0 | 467   | 1 | 737.8382   | 1473.662 | 2 | 79.73 | 1.90E-08 | GPSGEVSAQLFR  | Phospho (ST) | 0.0000001000000.0 | Synth_pep_275V.1465.1465.2.dta |
| GPSGVXSAQQLXR  | 9 5 5 1 | 1912  | 1 | 706.8636   | 1411.713 | 2 | 40.35 | 0.00037  | GPSGVSLAQLLK  | Phospho (ST) | 0.0000001000000.0 | Synth_pep_275V.1472.1472.2.dta |
| GPSGVXSAQQLXR  | 5 8 8 1 | 1118  | 1 | 674.8665   | 1347.719 | 2 | 54.6  | 1.00E-05 | GPSGLVSLAQLVK | Phospho (ST) | 0.0000001000000.0 | Synth_pep_275V.1473.1473.2.dta |
| SXPFKXSLXFLFGR | 5 5 5 1 | 1112  | 1 | 763.9238   | 1525.833 | 2 | 27.78 | 0.00017  | SLPFKLSPLFGK  | Phospho (ST) | 0.0000001000000.0 | Synth_pep_275V.1477.1477.2.dta |
| SXPFKXSLXFLFGR | 1 5 3 0 | 307   | 1 | 795.8907   | 1589.767 | 2 | 34.47 | 0.00012  | SDPFKLSPLFFGR | Phospho (ST) | 0.0000001000000.0 | Synth_pep_275V.1480.1480.2.dta |
| SXPFKXSLXFLFGR | 1 3 3 0 | 267   | 1 | 812.8828   | 1623.751 | 2 | 18.28 | 0.016    | SDPFKFSPLFFGR | Phospho (ST) | 0.0000001000000.0 | Synth_pep_275V.1481.1481.2.dta |
| SXPFKXSLXFLFGR | 5 5 5 1 | 1072  | 1 | 780.9162   | 1559.818 | 2 | 18.31 | 0.015    | SLPFKFSPLFGK  | Phospho (ST) | 0.0000001000000.0 | Synth_pep_275V.1482.1482.2.dta |
| SXPFKXSLXFLFGR | 3 3 8 0 | 1677  | 1 | 804.9034   | 1607.792 | 2 | 30.26 | 0.0015   | SXPFKFSPLFVGR | Phospho (ST) | 0.0000001000000.0 | Synth_pep_275V.1483.1483.2.dta |
| GPSGVXSAQQLXR  | 9 5 5 0 | 1911  | 1 | 720.8668   | 1439.719 | 2 | 80.37 | 1.90E-08 | GPSGVVSLAQLLR | Phospho (ST) | 0.0000001000000.0 | Synth_pep_275V.1488.1488.2.dta |
| SXPFKXSLXFLFGR | 5 5 5 0 | 1071  | 1 | 794.9186   | 1587.823 | 2 | 35.18 | 0.0003   | SLPFKFSPLFGR  | Phospho (ST) | 0.0000001000000.0 | Synth_pep_275V.1489.1489.2.dta |
| SXPFKXSLXFLFGR | 5 5 5 0 | 1111  | 1 | 777.9265   | 1553.838 | 2 | 37.76 | 0.00023  | SLPFKLSPLFGR  | Phospho (ST) | 0.0000001000000.0 | Synth_pep_275V.1496.1496.2.dta |
| GPSGVXSAQQLXR  | 5 3 5 0 | 1071  | 1 | 712.8693   | 1423.724 | 2 | 18.19 | 0.00015  | GPSGLVSAQLLR  | Phospho (ST) | 0.0000001000000.0 | Synth_pep_275V.1500.1500.2.dta |
| GPSGVXSAQQLXR  | 8 5 5 0 | 1711  | 1 | 688.8691   | 1375.724 | 2 | 85.23 | 6.70E-09 | GPSGVVSLAQLLR | Phospho (ST) | 0.0000001000000.0 | Synth_pep_275V.1504.1504.2.dta |
| SXPFKXSLXFLFGR | 5 3 3 1 | 1068  | 1 | 797.9082   | 1593.802 | 2 | 19.76 | 0.017    | SLPFKFSPLFFGK | Phospho (ST) | 0.0000001000000.0 | Synth_pep_275V.1505.1505.2.dta |
| GPSGVXSAQQLXR  | 5 8 3 1 | 11168 | 1 | 691.8584   | 1381.702 | 2 | 51.67 | 2.50E-05 | GPSGLVSAQLFK  | Phospho (ST) | 0.0000001000000.0 | Synth_pep_275V.1512.1512.2.dta |
| SXPFKXSLXFLFGR | 5 3 3 0 | 1067  | 1 | 811.9108   | 1621.807 | 2 | 15.28 | 0.036    | SLPFKFSPLFFGR | Phospho (ST) | 0.0000001000000.0 | Synth_pep_275V.1513.1513.2.dta |
| GPSGVXSAQQLXR  | 9 3 3 1 | 1868  | 1 | 740.8479   | 1479.681 | 2 | 46.1  | 0.00025  | GPSGVVSAQLFK  | Phospho (ST) | 0.0000001000000.0 | Synth_pep_275V.1520.1520.2.dta |
| GPSGVXSAQQLXR  | 5 8 3 0 | 1167  | 1 | 705.8615   | 1409.709 | 2 | 75    | 3.80E-08 | GPSGLVSAQLFR  | Phospho (ST) | 0.0000001000000.0 | Synth_pep_275V.1528.1528.2.dta |
| GPSGVXSAQQLXR  | 3 8 3 1 | 1768  | 1 | 708.8504   | 1415.686 | 2 | 44.91 | 0.0003   | GPSGFVSAQLFK  | Phospho (ST) | 0.0000001000000.0 | Synth_pep_275V.1529.1529.2.dta |
| GPSGVXSAQQLXR  | 9 5 3 0 | 1907  | 1 | 737.8585   | 1473.703 | 2 | 48.05 | 4.90E-05 | GPSGVVSAQLFR  | Phospho (ST) | 0.0000001000000.0 | Synth_pep_275V.1536.1536.2.dta |
| GPSGVXSAQQLXR  | 3 8 3 0 | 767   | 1 | 722.8531   | 1443.692 | 2 | 60.74 | 3.10E-06 | GPSGFVSAQLFR  | Phospho (ST) | 0.0000001000000.0 | Synth_pep_275V.1544.1544.2.dta |
| GPSGVXSAQQLXR  | 9 3 3 0 | 1867  | 1 | 754.8507   | 1507.687 | 2 | 73.68 | 1.70E-07 | GPSGVVSAQLFR  | Phospho (ST) | 0.0000001000000.0 | Synth_pep_275V.1545.1545.2.dta |
| GPSGVXSAQQLXR  | 5 3 5 1 | 1072  | 1 | 698.8661   | 1395.718 | 2 | 46.13 | 7.20E-05 | GPSGLVSAQLLK  | Phospho (ST) | 0.0000001000000.0 | Synth_pep_275V.1560.1560.2.dta |
| SXPFKXSLXFLFGR | 3 3 3 0 | 1677  | 1 | 828.9023   | 1655.79  | 2 | 18.23 | 0.015    | SXPFKFSPLFFGR | Phospho (ST) | 0.0000001000000.0 | Synth_pep_275V.1561.1561.2.dta |
| GPSGVXSAQQLXR  | 3 3 5 1 | 1672  | 1 | 715.8585   | 1429.703 | 2 | 38.24 | 0.00055  | GPSGFVSAQLLK  | Phospho (ST) | 0.0000001000000.0 | Synth_pep_275V.1568.1568.2.dta |
| GPSGVXSAQQLXR  | 5 5 5 1 | 1112  | 1 | 681.8739   | 1361.733 | 2 | 49.18 | 2.70E-05 | GPSGLVSAQLLK  | Phospho (ST) | 0.0000001000000.0 | Synth_pep_275V.1569.1569.2.dta |
| GPSGVXSAQQLXR  | 3 3 5 0 | 1671  | 1 | 729.8613   | 1457.708 | 2 | 62.55 | 1.40E-06 | GPSGFVSAQLLR  | Phospho (ST) | 0.0000001000000.0 | Synth_pep_275V.1584.1584.2.dta |
| GPSGVXSAQQLXR  | 5 5 5 0 | 1111  | 1 | 695.8772   | 1389.74  | 2 | 62.85 | 1.00E-06 | GPSGLVSAQLLR  | Phospho (ST) | 0.0000001000000.0 | Synth_pep_275V.1585.1585.2.dta |
| GPSGVXSAQQLXR  | 3 3 3 1 | 1668  | 1 | 732.8504   | 1463.686 | 2 | 40.95 | 0.00066  | GPSGFVSAQLFK  | Phospho (ST) | 0.0000001000000.0 | Synth_pep_275V.1624.1624.2.dta |
| GPSGVXSAQQLXR  | 5 5 3 1 | 1108  | 1 | 698.8666   | 1395.719 | 2 | 44.84 | 7.70E-05 | GPSGLVSAQLFK  | Phospho (ST) | 0.0000001000000.0 | Synth_pep_275V.1632.1632.2.dta |
| GPSGVXSAQQLXR  | 3 3 3 0 | 1667  | 1 | 746.8534   | 1491.692 | 2 | 54.52 | 7.90E-06 | GPSGFVSAQLFR  | Phospho (ST) | 0.0000001000000.0 | Synth_pep_275V.1640.1640.2.dta |
| GPSGVXSAQQLXR  | 3 5 3 0 | 707   | 1 | 729.8618   | 1457.709 | 2 | 60.39 | 2.30E-06 | GPSGFVSAQLFR  | Phospho (ST) | 0.0000001000000.0 | Synth_pep_275V.1648.1648.2.dta |
| GPSGVXSAQQLXR  | 5 5 3 0 | 1107  | 1 | 712.8699   | 1423.725 | 2 | 72.05 | 6.20E-08 | GPSGLVSAQLFR  | Phospho (ST) | 0.0000001000000.0 | Synth_pep_275V.1649.1649.2.dta |
| GPSGVXSAQQLXR  | 3 5 3 1 | 1708  | 1 | 715.8595   | 1429.704 | 2 | 23.11 | 0.018    | GPSGFVSAQLFK  | Phospho (ST) | 0.0000001000000.0 | Synth_pep_275V.1660.1660.2.dta |
| GPSGVXSAQQLXR  | 6 4 6 1 | 1294  | 1 | 627.7896   | 1253.565 | 2 | 52.9  | 2.90E-05 | GPSGVSQAQLSK  | Phospho (ST) | 0.0000001000000.0 | Synth_pep_275V.720.720.2.dta   |
| GPSGVXSAQQLXR  | 6 6 6 1 | 1334  | 1 | 642.7949   | 1283.575 | 2 | 46.15 | 0.00036  | GPSGVSQAQLSK  | Phospho (ST) | 0.0000001000000.0 | Synth_pep_275V.722.722.2.dta   |
| GPSGVXSAQQLXR  | 4 4 6 1 | 1894  | 1 | 612.7855   | 1223.556 | 2 | 42.8  | 0.00013  | GPSGVSQAQLSK  | Phospho (ST) | 0.0000001000000.0 | Synth_pep_275V.725.725.2.dta   |
| GPSGVXSAQQLXR  | 6 4 1 1 | 1284  | 1 | 641.7885   | 1281.562 | 2 | 56.47 | 1.30E-05 | GPSGVSQAQLDK  | Phospho (ST) | 0.0000001000000.0 | Synth_pep_275V.728.728.2.dta   |
| GPSGVXSAQQLXR  | 6 6 1 1 | 1324  | 1 | 656.7933   | 1311.572 | 2 | 43.29 | 0.00011  | GPSGVSQAQLDK  | Phospho (ST) | 0.0000001000000.0 | Synth_pep_275V.729.729.2.dta   |
| GPSGVXSAQQLXR  | 0 4 6 1 | 94    | 1 | 619.7933   | 1237.572 | 2 | 48.65 | 7.30E-05 | GPSGAVSAQLSK  | Phospho (ST) | 0.0000001000000.0 | Synth_pep_275V.730.730.2.dta   |
| GPSGVXSAQQLXR  | 1 4 1 1 | 284   | 1 | 655.7874   | 1309.56  | 2 | 60.35 | 7.20E-06 | GPSGDVSAQLDK  | Phospho (ST) | 0.0000001000000.0 | Synth_pep_275V.736.736.2.dta   |
| GPSGVXSAQQLXR  | 1 6 1 1 | 324   | 1 | 670.791    | 1339.567 | 2 | 50.52 | 1.70E-05 | GPSGDVSAQLDK  | Phospho (ST) | 0.0000001000000.0 | Synth_pep_275V.737.737.2.dta   |
| GPSGVXSAQQLXR  | 4 4 1 1 | 1884  | 1 | 626.784    | 1251.553 | 2 | 46.1  | 0.00031  | GPSGVSQAQLDK  | Phospho (ST) | 0.0000001000000.0 | Synth_pep_275V.738.738.2.dta   |
| GPSGVXSAQQLXR  | 0 4 4 1 | 190   | 1 | 604.7876   | 1207.561 | 2 | 36.86 | 0.00021  | GPSGAVSAQLGK  | Phospho (ST) | 0.0000001000000.0 | Synth_pep_275V.739.739.2.dta   |
| GPSGVXSAQQLXR  | 4 4 4 1 | 1890  | 1 | 597.7795</ |          |   |       |          |               |              |                   |                                |

|                            |   |          |          |   |       |          |                 |              |                  |                                            |
|----------------------------|---|----------|----------|---|-------|----------|-----------------|--------------|------------------|--------------------------------------------|
| GPSGXVSAQXLR 4 7 8 1 958   | 1 | 640.8162 | 1279.618 | 2 | 42.25 | 0.00021  | GPSGVSTAQLVK    | Phospho (ST) | 0.000001000000.0 | Synth_pep_275V.841.841.2.dta               |
| GPSGXVSAQXLR 6 8 4 1 1370  | 1 | 633.8083 | 1265.602 | 2 | 44.32 | 5.00E-05 | GPSGSVSAQQLG    | Phospho (ST) | 0.000001000000.0 | Synth_pep_275V.848.848.2.dta               |
| GPSGXVSAQXLR 1 1 9 0 239   | 1 | 722.8087 | 1443.603 | 2 | 67.47 | 6.40E-07 | GPSGDVSDAQLYR   | Phospho (ST) | 0.000001000000.0 | Synth_pep_275V.849.849.2.dta               |
| GPSGXVSAQXLR 6 8 1 1 1364  | 1 | 662.8112 | 1323.608 | 2 | 46.59 | 7.20E-05 | GPSGSVSAQLDK    | Phospho (ST) | 0.000001000000.0 | Synth_pep_275V.850.850.2.dta               |
| GPSGXVSAQXLR 0 8 0 1 37    | 1 | 668.8166 | 1335.619 | 2 | 79.47 | 4.20E-08 | GPSGAVSDAQLVR   | Phospho (ST) | 0.000001000000.0 | Synth_pep_275V.851.851.2.dta               |
| GPSGXVSAQXLR 2 1 9 0 439   | 1 | 729.8165 | 1457.619 | 2 | 56.53 | 9.70E-06 | GPSGEVSDAQLYR   | Phospho (ST) | 0.000001000000.0 | Synth_pep_275V.852.852.2.dta               |
| GPSGXVSAQXLR 0 7 8 1 158   | 1 | 647.8246 | 1293.635 | 2 | 41.49 | 0.00034  | GPSGAVSTAQLVK   | Phospho (ST) | 0.000001000000.0 | Synth_pep_275V.853.853.2.dta               |
| GPSGXVSAQXLR 2 7 8 1 558   | 1 | 676.8289 | 1351.643 | 2 | 45.61 | 0.00018  | GPSGEVSTAQLVK   | Phospho (ST) | 0.000001000000.0 | Synth_pep_275V.854.854.2.dta               |
| GPSGXVSAQXLR 8 7 1 0 1743  | 1 | 683.8187 | 1365.623 | 2 | 64.71 | 2.10E-06 | GPSGVSTAQLDR    | Phospho (ST) | 0.000001000000.0 | Synth_pep_275V.856.856.2.dta               |
| GPSGXVSAQXLR 4 8 4 1 970   | 1 | 618.8032 | 1235.592 | 2 | 38.96 | 0.00013  | GPSGSVSAQLGK    | Phospho (ST) | 0.000001000000.0 | Synth_pep_275V.864.864.2.dta               |
| GPSGXVSAQXLR 8 7 2 0 1745  | 1 | 690.8263 | 1379.638 | 2 | 41.3  | 0.00049  | GPSGVSTAQLER    | Phospho (ST) | 0.000001000000.0 | Synth_pep_275V.865.865.2.dta               |
| GPSGXVSAQXLR 8 0 4 1 1610  | 1 | 625.811  | 1249.608 | 2 | 40.43 | 0.00012  | GPSGVSAQAQLGK   | Phospho (ST) | 0.000001000000.0 | Synth_pep_275V.867.867.2.dta               |
| GPSGXVSAQXLR 8 0 1 1 1604  | 1 | 654.8144 | 1307.614 | 2 | 43.58 | 0.00023  | GPSGVSAQAQLDK   | Phospho (ST) | 0.000001000000.0 | Synth_pep_275V.872.872.2.dta               |
| GPSGXVSAQXLR 6 8 2 1 1366  | 1 | 669.8197 | 1337.625 | 2 | 40.78 | 0.00033  | GPSGSVSAQLEK    | Phospho (ST) | 0.000001000000.0 | Synth_pep_275V.874.874.2.dta               |
| GPSGXVSAQXLR 2 2 9 0 459   | 1 | 736.8264 | 1471.638 | 2 | 70.61 | 3.20E-07 | GPSGEVSEAQLYR   | Phospho (ST) | 0.000001000000.0 | Synth_pep_275V.876.876.2.dta               |
| GPSGXVSAQXLR 9 2 4 0 1849  | 1 | 700.8146 | 1399.615 | 2 | 56.54 | 1.00E-05 | GPSGVSEAQLGR    | Phospho (ST) | 0.000001000000.0 | Synth_pep_275V.880.880.2.dta               |
| GPSGXVSAQXLR 9 0 1 1 1804  | 1 | 686.8136 | 1371.613 | 2 | 44.25 | 0.00034  | GPSGVSAQAQLDK   | Phospho (ST) | 0.000001000000.0 | Synth_pep_275V.888.888.2.dta               |
| GPSGXVSAQXLR 5 4 2 1 1086  | 1 | 661.8223 | 1321.63  | 2 | 35.25 | 0.00019  | GPSGLVSAQAQLEK  | Phospho (ST) | 0.000001000000.0 | Synth_pep_275V.896.896.2.dta               |
| GPSGXVSAQXLR 0 8 0 1 162   | 1 | 632.8195 | 1263.625 | 2 | 40.31 | 0.00014  | GPSGAVSAQQLAK   | Phospho (ST) | 0.000001000000.0 | Synth_pep_275V.898.898.2.dta               |
| SXPFKXSPXLFGR 4 6 4 1 930  | 1 | 694.8343 | 1387.654 | 2 | 31.06 | 0.006    | SGPFKSSPLFGFK   | Phospho (ST) | 0.000001000000.0 | Synth_pep_275V.904.904.2.dta               |
| SXPFKXSPXLFGR 2 6 4 1 530  | 1 | 730.8453 | 1459.676 | 2 | 27.13 | 0.013    | SEPFKSSPLFGFK   | Phospho (ST) | 0.000001000000.0 | Synth_pep_275V.910.910.2.dta               |
| GPSGXVSAQXLR 4 5 6 1 914   | 1 | 640.8162 | 1279.618 | 2 | 40.11 | 0.00035  | GPSGVSLAQLSK    | Phospho (ST) | 0.000001000000.0 | Synth_pep_275V.914.914.2.dta               |
| GPSGXVSAQXLR 1 8 2 0 365   | 1 | 697.8198 | 1393.625 | 2 | 61.53 | 9.90E-06 | GPSGDVSAQLER    | Phospho (ST) | 0.000001000000.0 | Synth_pep_275V.915.915.2.dta               |
| GPSGXVSAQXLR 3 6 6 1 734   | 1 | 672.8137 | 1343.613 | 2 | 28.23 | 0.02     | GPSGFVSAQSLK    | Phospho (ST) | 0.000001000000.0 | Synth_pep_275V.916.916.2.dta               |
| GPSGXVSAQXLR 5 4 4 0 1089  | 1 | 639.8138 | 1277.613 | 2 | 64.78 | 3.70E-06 | GPSGLVSAQAQLGR  | Phospho (ST) | 0.000001000000.0 | Synth_pep_275V.921.921.2.dta               |
| SXPFKXSPXLFGR 7 6 2 1 1526 | 1 | 752.858  | 1503.701 | 2 | 25.69 | 0.0061   | STPFKSSPLFGFK   | Phospho (ST) | 0.000001000000.0 | Synth_pep_275V.922.922.2.dta               |
| SXPFKXSPXLFGR 0 1 4 1 30   | 1 | 715.8409 | 1429.667 | 2 | 24.71 | 0.019    | SAPFKDPSPLFGFK  | Phospho (ST) | 0.000001000000.0 | Synth_pep_275V.928.928.2.dta               |
| GPSGXVSAQXLR 5 6 1 0 1123  | 1 | 683.8204 | 1365.626 | 2 | 59.05 | 6.30E-06 | GPSGLVSAQQLDR   | Phospho (ST) | 0.000001000000.0 | Synth_pep_275V.929.929.2.dta               |
| GPSGXVSAQXLR 8 1 8 1 1638  | 1 | 668.832  | 1335.649 | 2 | 47.73 | 0.00011  | GPSGVSDAQLVK    | Phospho (ST) | 0.000001000000.0 | Synth_pep_275V.931.931.2.dta               |
| GPSGXVSAQXLR 3 4 6 0 693   | 1 | 671.809  | 1341.604 | 2 | 38.32 | 0.00064  | GPSGFVSAQAQLSR  | Phospho (ST) | 0.000001000000.0 | Synth_pep_275V.932.932.2.dta               |
| GPSGXVSAQXLR 2 8 2 0 565   | 1 | 704.8284 | 1407.642 | 2 | 34.21 | 0.00059  | GPSGEVSAQLEK    | Phospho (ST) | 0.000001000000.0 | Synth_pep_275V.933.933.2.dta               |
| SXPFKXSPXLFGR 0 1 0 1 22   | 1 | 722.8498 | 1443.685 | 2 | 26.11 | 0.02     | SAPFKDPSPLFGFK  | Phospho (ST) | 0.000001000000.0 | Synth_pep_275V.936.936.2.dta               |
| SXPFKXSPXLFGR 6 4 4 0 1289 | 1 | 708.837  | 1415.659 | 2 | 26.39 | 0.015    | SGPFKSSPLFGFK   | Phospho (ST) | 0.000001000000.0 | Synth_pep_275V.937.937.2.dta               |
| SXPFKXSPXLFGR 4 4 4 0 889  | 1 | 693.8322 | 1385.65  | 2 | 28.33 | 0.009    | SGPFKSSPLFGFK   | Phospho (ST) | 0.000001000000.0 | Synth_pep_275V.939.939.2.dta               |
| GPSGXVSAQXLR 5 6 2 1 1126  | 1 | 676.8292 | 1351.644 | 2 | 61.12 | 5.10E-06 | GPSGLVSAQAQLEK  | Phospho (ST) | 0.000001000000.0 | Synth_pep_275V.941.941.2.dta               |
| GPSGXVSAQXLR 5 6 7 0 1135  | 1 | 676.8292 | 1351.644 | 2 | 61.12 | 5.10E-06 | GPSGLVSAQAQLTR  | Phospho (ST) | 0.000001000000.0 | Synth_pep_275V.941.941.2.dta               |
| SXPFKXSPXLFGR 0 2 2 1 46   | 1 | 758.858  | 1515.701 | 2 | 23.99 | 0.017    | SAPFKESPLFGFK   | Phospho (ST) | 0.000001000000.0 | Synth_pep_275V.942.942.2.dta               |
| SXPFKXSPXLFGR 7 6 2 0 1525 | 1 | 766.8605 | 1531.706 | 2 | 56.05 | 8.60E-06 | STPFKSSPLFGFK   | Phospho (ST) | 0.000001000000.0 | Synth_pep_275V.944.944.2.dta               |
| GPSGXVSAQXLR 7 1 5 0 1431  | 1 | 690.8295 | 1379.645 | 2 | 58.76 | 6.20E-06 | GPSGDVSDAQLLR   | Phospho (ST) | 0.000001000000.0 | Synth_pep_275V.947.947.2.dta               |
| SXPFKXSPXLFGR 7 2 2 1 1446 | 1 | 773.8629 | 1545.711 | 2 | 19.46 | 0.011    | STPFKESPLFGFK   | Phospho (ST) | 0.000001000000.0 | Synth_pep_275V.948.948.2.dta               |
| SXPFKXSPXLFGR 6 6 2 0 1325 | 1 | 759.8531 | 1517.692 | 2 | 28.2  | 0.0048   | SGPFKSSPLFGFK   | Phospho (ST) | 0.000001000000.0 | Synth_pep_275V.952.952.2.dta               |
| SXPFKXSPXLFGR 2 6 2 0 525  | 1 | 780.858  | 1559.702 | 2 | 51.62 | 3.40E-05 | SEPFKSSPLFGFK   | Phospho (ST) | 0.000001000000.0 | Synth_pep_275V.954.954.2.dta               |
| GPSGXVSAQXLR 9 7 9 1 1960  | 1 | 725.8342 | 1449.654 | 2 | 31.93 | 0.0095   | GPSGVSTAQLYK    | Phospho (ST) | 0.000001000000.0 | Synth_pep_275V.956.956.2.dta               |
| GPSGXVSAQXLR 8 1 8 0 1637  | 1 | 682.8328 | 1363.651 | 2 | 25.01 | 0.015    | GPSGVSDAQLVLR   | Phospho (ST) | 0.000001000000.0 | Synth_pep_275V.957.957.2.dta               |
| GPSGXVSAQXLR 5 7 0 1 1142  | 1 | 654.8328 | 1307.651 | 2 | 48.35 | 6.10E-05 | GPSGLVSTAQAQLEK | Phospho (ST) | 0.000001000000.0 | Synth_pep_275V.958.958.2.dta               |
| SXPFKXSPXLFGR 0 6 9 1 140  | 1 | 754.8631 | 1507.712 | 2 | 25.9  | 0.022    | SAPFKSSPLFGFK   | Phospho (ST) | 0.000001000000.0 | Synth_pep_275V.960.960.2.dta               |
| SXPFKXSPXLFGR 0 2 2 0 45   | 1 | 772.8608 | 1543.707 | 2 | 52.43 | 3.70E-05 | SAPFKESPLFGFK   | Phospho (ST) | 0.000001000000.0 | Synth_pep_275V.961.961.2.dta               |
| GPSGXVSAQXLR 3 4 7 0 695   | 1 | 678.8186 | 1355.623 | 2 | 44.59 | 0.00017  | GPSGFVSAQAQLTR  | Phospho (ST) | 0.000001000000.0 | Synth_pep_275V.962.962.2.dta               |
| SXPFKXSPXLFGR 2 2 2 1 446  | 1 | 787.8602 | 1573.706 | 2 | 20.34 | 0.015    | SEPFKESPLFGFK   | Phospho (ST) | 0.000001000000.0 | Synth_pep_275V.963.963.2.dta               |
| GPSGXVSAQXLR 0 5 1 0 31    | 1 | 675.8236 | 1349.633 | 2 | 46.61 | 8.60E-05 | GPSGAVSDAQLLR   | Phospho (ST) | 0.000001000000.0 | Synth_pep_275V.964.964.2.dta               |
| GPSGXVSAQXLR 0 5 6 1 114   | 1 | 647.8239 | 1293.633 | 2 | 35.14 | 0.0015   | GPSGAVSLAQLSK   | Phospho (ST) | 0.000001000000.0 | Synth_pep_275V.965.965.2.dta               |
| SXPFKXSPXLFGR 4 0 4 0 809  | 1 | 700.8385 | 1399.663 | 2 | 62.08 | 5.50E-06 | SGPFKASPLFGFK   | Phospho (ST) | 0.000001000000.0 | Synth_pep_275V.968.968.2.dta               |
| GPSGXVSAQXLR 6 5 1 1 1304  | 1 | 669.8184 | 1337.622 | 2 | 55.95 | 1.00E-05 | GPSGSVSAQAQLDK  | Phospho (ST) | 0.000001000000.0 | Synth_pep_275V.970.970.2.dta               |
| SXPFKXSPXLFGR 7 6 9 1 1540 | 1 | 769.8677 | 1537.721 | 2 | 20.08 | 0.04     | STPFKSSPLFGFK   | Phospho (ST) | 0.000001000000.0 | Synth_pep_275V.971.971.2.dta               |
| SXPFKXSPXLFGR 6 4 9 1 1300 | 1 | 747.8547 | 1493.695 | 2 | 36.94 | 0.0019   | SGPFKSSPLFGFK   | Phospho (ST) | 0.000001000000.0 | Synth_pep_275V.972.972.2.dta               |
| GPSGXVSAQXLR 5 0 4 1 1010  | 1 | 632.8184 | 1263.622 | 2 | 51.07 | 2.00E-05 | GPSGLVSAQAQLGK  | Phospho (ST) | 0.000001000000.0 | Synth_pep_275V.977.977.2.dta               |
| SXPFKXSPXLFGR 0 2 9 1 60   | 1 | 775.8685 | 1549.723 | 2 | 40.81 | 0.00052  | SAPFKESPLFGFK   | Phospho (ST) | 0.000001000000.0 | Synth_pep_275V.978.978.2.dta               |
| GPSGXVSAQXLR 9 8 6 1 1974  | 1 | 686.83   | 1371.646 | 2 | 37.51 | 0.0018   | GPSGVVSAQAQLK   | Phospho (ST) | 0.000001000000.0 | Synth_pep_275V.979.979.2.dta               |
| SXPFKXSPXLFGR 2 2 2 0 445  | 1 | 801.8629 | 1601.711 | 2 | 42.28 | 0.00012  | SEPFKESPLFGFK   | Phospho (ST) | 0.000001000000.0 | Synth_pep_275V.980.980.2.dta               |
| GPSGXVSAQXLR 5 0 1 1 1004  | 1 | 661.8217 | 1321.629 | 2 | 40.89 | 0.00051  | GPSGLVSAQAQLDK  | Phospho (ST) | 0.000001000000.0 | Synth_pep_275V.981.981.2.dta               |
| GPSGXVSAQXLR 9 9 1 1 1984  | 1 | 732.827  | 1463.639 | 2 | 50.14 | 6.80E-05 | GPSGVVSAQAQLDK  | Phospho (ST) | 0.000001000000.0 | Synth_pep_275V.985.985.2.dta               |
| GPSGXVSAQXLR 5 2 2 0 1045  | 1 | 711.8353 | 1421.656 | 2 | 66.62 | 2.40E-06 | GPSGLVSEAQLER   | Phospho (ST) | 0.000001000000.0 | Synth_pep_275V.986.986.2.dta               |
| SXPFKXSPXLFGR 2 1 2 0 425  | 1 | 794.8553 | 1587.696 | 2 | 30.66 | 0.0022   | SEPFKSSPLFGFK   | Phospho (ST) | 0.000001000000.0 | Synth_pep_275V.987.987.2.dta               |
| GPSGXVSAQXLR 4 5 4 1 910   | 1 | 625.8105 | 1249.606 | 2 | 58.2  | 2.00E-06 | GPSGSVSAQAQLGK  | Phospho (ST) | 0.000001000000.0 | Synth_pep_275V.988.988.2.dta               |
| SXPFKXSPXLFGR 7 2 9 1 1460 | 1 | 790.8735 | 1579.733 | 2 | 17.36 | 0.027    | STPFKESPLFGFK   | Phospho (ST) | 0.000001000000.0 | Synth_pep_275V.989.989.2.dta               |
| GPSGXVSAQXLR 3 2 1 1 644   | 1 | 707.8172 | 1413.62  | 2 | 34.61 | 0.0017   | GPSGFVSAQAQLDK  | Phospho (ST) | 0.000001000000.0 | Synth_pep_275V.990.990.2.dta               |
| SXPFKXSPXLFGR 6 6 9 0 1339 | 1 | 776.8633 | 1551.712 | 2 | 43.22 | 0.00016  | SGPFKSSPLFGFK   | Phospho (ST) | 0.000001000000.0 | Synth_pep_275V.993.993.2.dta               |
| SXPFKXSPXLFGR 0 2 1 0 43   | 1 | 765.8497 | 1529.685 | 2 | 27.28 | 0.013    | SAPFKESPLFGFK   | Phospho (ST) | 0.000001000000.0 | Synth_pep_275V.994.994.2.dta               |
| SXPFKXSPXLFGR 2 2 9 1 460  | 1 | 804.87   | 1607.725 | 2 | 30.44 | 0.0018   | SEPFKESPLFGFK   | Phospho (ST) | 0.000001000000.0 | Synth_pep_275V.995.995.2.dta               |
| GPSGXVSAQXLR 3 0 0 1 602   | 1 | 656.8194 | 1311.624 | 2 | 46.67 | 8.30E-05 | GPSGFVSAQAQLAK  | Phospho (ST) | 0.000001000000.0 | Synth_pep_30V_120502214048.1001.1001.2.dta |
| SXPFKXSPXLFGR 9 4 1 1 1884 | 1 | 761.8539 | 1521.693 | 2 | 30.31 | 0.008    | SYPFKSSPLDFGK   | Phospho (ST) | 0.000001000000.0 | Synth_pep_30V_120502214048.1003.1003.2.dta |
| GPSGXVSAQXLR 0 3 4 1 70    | 1 | 649.8099 | 1297.605 | 2 | 33.02 | 0.0033   | GPSGAVSFAQLGK   | Phospho (ST) | 0.000001000000.0 | Synth_pep_30V_120502214048.1004.1004.2.dta |
| SXPFKXSPXLFGR 9 4 2 0 1885 | 1 | 782.8618 | 1563.709 | 2 | 34.15 | 0.0022   | SYPFKSSPLFGFK   | Phospho (ST) | 0.000001000000.0 | Synth_pep_30V_120502214048.1006.1006.2.dta |
| GPSGXVSAQXLR 5 0 0 0 1001  | 1 | 653.8287 | 1305.643 | 2 | 62.63 | 5.50E-07 | GPSGLVSAQAQLAR  | Phospho (ST) | 0.000001000000.0 | Synth_pep_30V_120502214048.1008.1008.2.dta |
| GPSGXVSAQXLR 8 8 2 0 1765  | 1 | 689.8393 | 1377.664 | 2 | 67.65 | 4.70E-07 | GPSGVVSAQAQLER  | Phospho (ST) | 0.000001000000.0 | Synth_pep_30V_120502214048.1009.1009.2.dta |
| SXPFKXSPXLFGR 1 2 2 0 245  | 1 | 794.8545 | 1587.694 | 2 | 38.11 | 0.00039  | SDPFKESPLFGFK   | Phospho (ST) | 0.000001000000.0 | Synth_pep_30V_120502214048.1010.1010.2.dta |
| SXPFKXSPXLFGR 1 2 6 0 253  | 1 | 773.8477 | 1545.681 | 2 | 32.74 | 0.0019   | SDPFKESPLFGFK   | Phospho (ST) | 0.000001000000.0 | Synth_pep_30V_120502214048.1011.1011.2.dta |
| GPSGXVSAQXLR 0 3 1 1 64    | 1 | 678.8115 | 1355.608 | 2 | 45.11 | 0.00022  | GPSGAVSFAQLDK   | Phospho (ST) | 0.000001000000.0 | Synth_pep_30V_1                            |

|                            |   |          |          |   |       |          |                |              |                   |                                            |
|----------------------------|---|----------|----------|---|-------|----------|----------------|--------------|-------------------|--------------------------------------------|
| GPSGVSAQAQLXR 9 9 9 0 1999 | 1 | 770.8437 | 1539.673 | 2 | 66.43 | 8.20E-07 | GPSGVSAQAQLYR  | Phospho (ST) | 0.0000001000000.0 | Synth_pep_30V_120502214048.1080.1080.2.dta |
| GPSGVSAQAQLXR 5 9 1 0 1183 | 1 | 721.8369 | 1441.659 | 2 | 66.93 | 1.00E-06 | GPSGLVSAQAQLDR | Phospho (ST) | 0.0000001000000.0 | Synth_pep_30V_120502214048.1081.1081.2.dta |
| GPSGVSAQAQLXR 0 3 0 0 61   | 1 | 670.8199 | 1339.625 | 2 | 48.86 | 6.40E-05 | GPSGAVSAQAQLR  | Phospho (ST) | 0.0000001000000.0 | Synth_pep_30V_120502214048.1083.1083.2.dta |
| GPSGVSAQAQLXR 5 9 7 1 1196 | 1 | 700.8441 | 1399.674 | 2 | 38.91 | 0.0017   | GPSGLVSAQAQLTK | Phospho (ST) | 0.0000001000000.0 | Synth_pep_30V_120502214048.1089.1089.2.dta |
| GPSGVSAQAQLXR 0 0 3 1 8    | 1 | 656.8176 | 1311.621 | 2 | 47.3  | 0.00012  | GPSGAVSAQAQLFK | Phospho (ST) | 0.0000001000000.0 | Synth_pep_30V_120502214048.1090.1090.2.dta |
| SXPFKXSPLXFR 7 8 2 0 1565  | 1 | 772.8771 | 1543.74  | 2 | 33.86 | 0.003    | STPFKVSPLFVGR  | Phospho (ST) | 0.0000001000000.0 | Synth_pep_30V_120502214048.1091.1091.2.dta |
| SXPFKXSPLXFR 7 8 6 0 1573  | 1 | 751.8716 | 1501.729 | 2 | 34.74 | 0.00017  | STPFKVSPLSFR   | Phospho (ST) | 0.0000001000000.0 | Synth_pep_30V_120502214048.1093.1093.2.dta |
| GPSGVSAQAQLXR 5 8 4 1 1170 | 1 | 646.8342 | 1291.654 | 2 | 46.76 | 0.00011  | GPSGLVSAQAQLGK | Phospho (ST) | 0.0000001000000.0 | Synth_pep_30V_120502214048.1094.1094.2.dta |
| GPSGVSAQAQLXR 5 0 8 1 1018 | 1 | 653.8412 | 1305.668 | 2 | 49.12 | 5.30E-05 | GPSGLVSAQAQLVK | Phospho (ST) | 0.0000001000000.0 | Synth_pep_30V_120502214048.1096.1096.2.dta |
| GPSGVSAQAQLXR 3 0 9 1 620  | 1 | 702.8304 | 1403.646 | 2 | 35.85 | 0.0018   | GPSGVSAQAQLYK  | Phospho (ST) | 0.0000001000000.0 | Synth_pep_30V_120502214048.1097.1097.2.dta |
| GPSGVSAQAQLXR 5 8 1 0 1163 | 1 | 689.8394 | 1377.664 | 2 | 62.08 | 1.70E-06 | GPSGLVSAQAQLDR | Phospho (ST) | 0.0000001000000.0 | Synth_pep_30V_120502214048.1098.1098.2.dta |
| SXPFKXSPLXFR 9 7 9 0 1959  | 1 | 821.884  | 1641.753 | 2 | 30.16 | 0.002    | SYPFKVSPFLVGR  | Phospho (ST) | 0.0000001000000.0 | Synth_pep_30V_120502214048.1101.1101.2.dta |
| SXPFKXSPLXFR 2 8 2 0 565   | 1 | 786.874  | 1571.734 | 2 | 34.31 | 0.0017   | SEPFKVSPLFGR   | Phospho (ST) | 0.0000001000000.0 | Synth_pep_30V_120502214048.1102.1102.2.dta |
| GPSGVSAQAQLXR 8 3 1 1 1664 | 1 | 692.8286 | 1383.643 | 2 | 41.55 | 0.00044  | GPSGVSAQAQLDK  | Phospho (ST) | 0.0000001000000.0 | Synth_pep_30V_120502214048.1104.1104.2.dta |
| GPSGVSAQAQLXR 5 9 0 1 1182 | 1 | 685.8392 | 1369.664 | 2 | 49.22 | 7.30E-05 | GPSGLVSAQAQLAK | Phospho (ST) | 0.0000001000000.0 | Synth_pep_30V_120502214048.1105.1105.2.dta |
| GPSGVSAQAQLXR 8 3 6 1 1674 | 1 | 678.8314 | 1355.648 | 2 | 30.4  | 0.0055   | GPSGVSAQAQLSK  | Phospho (ST) | 0.0000001000000.0 | Synth_pep_30V_120502214048.1106.1106.2.dta |
| SXPFKXSPLXFR 0 8 1 0 163   | 1 | 750.864  | 1499.714 | 2 | 33.78 | 0.0032   | SAPFKVSPFLDFGR | Phospho (ST) | 0.0000001000000.0 | Synth_pep_30V_120502214048.1107.1107.2.dta |
| SXPFKXSPLXFR 6 9 9 0 1399  | 1 | 814.8774 | 1627.74  | 2 | 27.44 | 0.0056   | SSPFKVSPLFGR   | Phospho (ST) | 0.0000001000000.0 | Synth_pep_30V_120502214048.1108.1108.2.dta |
| GPSGVSAQAQLXR 3 9 7 1 796  | 1 | 717.8365 | 1433.658 | 2 | 41.21 | 0.00084  | GPSGVSAQAQLTK  | Phospho (ST) | 0.0000001000000.0 | Synth_pep_30V_120502214048.1110.1110.2.dta |
| GPSGVSAQAQLXR 8 5 6 0 1713 | 1 | 675.841  | 1349.668 | 2 | 80.36 | 3.90E-08 | GPSGVSAQAQLSR  | Phospho (ST) | 0.0000001000000.0 | Synth_pep_30V_120502214048.1112.1112.2.dta |
| GPSGVSAQAQLXR 5 6 3 0 1127 | 1 | 699.8421 | 1397.67  | 2 | 53.41 | 2.10E-05 | GPSGLVSAQAQLFR | Phospho (ST) | 0.0000001000000.0 | Synth_pep_30V_120502214048.1113.1113.2.dta |
| SXPFKXSPLXFR 7 8 1 0 1563  | 1 | 765.8693 | 1529.724 | 2 | 31.56 | 0.0051   | STPFKVSPLDFGR  | Phospho (ST) | 0.0000001000000.0 | Synth_pep_30V_120502214048.1114.1114.2.dta |
| GPSGVSAQAQLXR 8 8 9 0 1779 | 1 | 706.8502 | 1411.686 | 2 | 74.98 | 7.60E-08 | GPSGVSAQAQLYR  | Phospho (ST) | 0.0000001000000.0 | Synth_pep_30V_120502214048.1120.1120.2.dta |
| GPSGVSAQAQLXR 9 3 4 1 1870 | 1 | 695.8226 | 1389.631 | 2 | 30.45 | 0.0054   | GPSGVSAQAQLGK  | Phospho (ST) | 0.0000001000000.0 | Synth_pep_30V_120502214048.1121.1121.2.dta |
| SXPFKXSPLXFR 1 9 2 0 385   | 1 | 811.8643 | 1621.714 | 2 | 43.19 | 0.00015  | SDPFKVSPLFGR   | Phospho (ST) | 0.0000001000000.0 | Synth_pep_30V_120502214048.1122.1122.2.dta |
| GPSGVSAQAQLXR 2 9 5 0 591  | 1 | 728.8441 | 1455.674 | 2 | 46    | 0.0001   | GPSGLVSAQAQLR  | Phospho (ST) | 0.0000001000000.0 | Synth_pep_30V_120502214048.1128.1128.2.dta |
| GPSGVSAQAQLXR 5 9 2 1 1186 | 1 | 714.8441 | 1427.674 | 2 | 35.22 | 0.0011   | GPSGLVSAQAQLK  | Phospho (ST) | 0.0000001000000.0 | Synth_pep_30V_120502214048.1130.1130.2.dta |
| GPSGVSAQAQLXR 1 9 5 1 392  | 1 | 707.8343 | 1413.654 | 2 | 29.71 | 0.0048   | GPSGVSAQAQLK   | Phospho (ST) | 0.0000001000000.0 | Synth_pep_30V_120502214048.1131.1131.2.dta |
| GPSGVSAQAQLXR 5 8 0 0 1161 | 1 | 667.8444 | 1333.674 | 2 | 62.68 | 7.30E-07 | GPSGLVSAQAQLAR | Phospho (ST) | 0.0000001000000.0 | Synth_pep_30V_120502214048.1136.1136.2.dta |
| GPSGVSAQAQLXR 8 8 8 1 1778 | 1 | 660.8514 | 1319.688 | 2 | 38.27 | 0.00048  | GPSGVSAQAQLVK  | Phospho (ST) | 0.0000001000000.0 | Synth_pep_30V_120502214048.1137.1137.2.dta |
| GPSGVSAQAQLXR 3 9 0 0 781  | 1 | 716.8331 | 1431.652 | 2 | 58.99 | 9.30E-06 | GPSGVSAQAQLAR  | Phospho (ST) | 0.0000001000000.0 | Synth_pep_30V_120502214048.1138.1138.2.dta |
| GPSGVSAQAQLXR 4 3 9 0 879  | 1 | 709.8255 | 1417.636 | 2 | 48.04 | 0.0001   | GPSGVSAQAQLYR  | Phospho (ST) | 0.0000001000000.0 | Synth_pep_30V_120502214048.1139.1139.2.dta |
| GPSGVSAQAQLXR 6 8 5 1 1372 | 1 | 661.8374 | 1321.66  | 2 | 38.91 | 0.0016   | GPSGVSAQAQLK   | Phospho (ST) | 0.0000001000000.0 | Synth_pep_30V_120502214048.1144.1144.2.dta |
| SXPFKXSPLXFR 1 8 6 0 373   | 1 | 758.8614 | 1515.708 | 2 | 46.25 | 0.00016  | SDPFKVSPLSFR   | Phospho (ST) | 0.0000001000000.0 | Synth_pep_30V_120502214048.1145.1145.2.dta |
| GPSGVSAQAQLXR 2 3 9 0 479  | 1 | 745.8353 | 1489.656 | 2 | 35.39 | 0.0013   | GPSGVSAQAQLYR  | Phospho (ST) | 0.0000001000000.0 | Synth_pep_30V_120502214048.1147.1147.2.dta |
| GPSGVSAQAQLXR 3 9 2 1 786  | 1 | 731.8362 | 1461.658 | 2 | 35.29 | 0.0016   | GPSGLVSAQAQLK  | Phospho (ST) | 0.0000001000000.0 | Synth_pep_30V_120502214048.1148.1148.2.dta |
| GPSGVSAQAQLXR 5 1 5 0 1031 | 1 | 696.8469 | 1391.679 | 2 | 63.46 | 1.90E-06 | GPSGLVSAQAQLR  | Phospho (ST) | 0.0000001000000.0 | Synth_pep_30V_120502214048.1152.1152.2.dta |
| GPSGVSAQAQLXR 8 3 2 0 1665 | 1 | 713.8385 | 1425.663 | 2 | 61.64 | 2.80E-06 | GPSGVSAQAQLER  | Phospho (ST) | 0.0000001000000.0 | Synth_pep_30V_120502214048.1154.1154.2.dta |
| SXPFKXSPLXFR 1 8 2 0 365   | 1 | 779.8674 | 1557.72  | 2 | 33.76 | 0.0024   | SDPFKVSPLFGR   | Phospho (ST) | 0.0000001000000.0 | Synth_pep_30V_120502214048.1156.1156.2.dta |
| GPSGVSAQAQLXR 2 5 8 1 518  | 1 | 682.8442 | 1363.674 | 2 | 39.24 | 0.00066  | GPSGEVSAQAQLVK | Phospho (ST) | 0.0000001000000.0 | Synth_pep_30V_120502214048.1160.1160.2.dta |
| GPSGVSAQAQLXR 6 9 3 1 1388 | 1 | 710.8278 | 1419.641 | 2 | 31.77 | 0.0047   | GPSGVSAQAQLFK  | Phospho (ST) | 0.0000001000000.0 | Synth_pep_30V_120502214048.1161.1161.2.dta |
| SXPFKXSPLXFR 6 5 6 0 1313  | 1 | 751.8726 | 1501.731 | 2 | 26.24 | 0.005    | SSPFKVSPLSFR   | Phospho (ST) | 0.0000001000000.0 | Synth_pep_30V_120502214048.1168.1168.2.dta |
| GPSGVSAQAQLXR 8 3 0 1 1662 | 1 | 707.8337 | 1339.653 | 2 | 40.86 | 0.00074  | GPSGVSAQAQLAK  | Phospho (ST) | 0.0000001000000.0 | Synth_pep_30V_120502214048.1169.1169.2.dta |
| GPSGVSAQAQLXR 6 9 3 0 1387 | 1 | 674.8287 | 1447.643 | 2 | 50.73 | 6.30E-05 | GPSGVSAQAQLFR  | Phospho (ST) | 0.0000001000000.0 | Synth_pep_30V_120502214048.1170.1170.2.dta |
| GPSGVSAQAQLXR 4 8 5 1 1972 | 1 | 646.8337 | 1291.653 | 2 | 53.19 | 2.50E-05 | GPSGVSAQAQLK   | Phospho (ST) | 0.0000001000000.0 | Synth_pep_30V_120502214048.1171.1171.2.dta |
| SXPFKXSPLXFR 0 5 2 0 105   | 1 | 764.88   | 1527.746 | 2 | 40.63 | 0.00053  | SAPFKVSPLEFR   | Phospho (ST) | 0.0000001000000.0 | Synth_pep_30V_120502214048.1172.1172.2.dta |
| GPSGVSAQAQLXR 0 5 8 1 1118 | 1 | 653.8416 | 1305.669 | 2 | 42.58 | 0.00024  | GPSGAVSAQAQLVK | Phospho (ST) | 0.0000001000000.0 | Synth_pep_30V_120502214048.1176.1176.2.dta |
| SXPFKXSPLXFR 6 5 2 0 1305  | 1 | 772.8794 | 1543.744 | 2 | 44.58 | 0.0002   | SSPFKVSPLFGR   | Phospho (ST) | 0.0000001000000.0 | Synth_pep_30V_120502214048.1177.1177.2.dta |
| GPSGVSAQAQLXR 5 2 5 0 1051 | 1 | 703.8549 | 1405.695 | 2 | 36.31 | 0.0015   | GPSGLVSAQAQLR  | Phospho (ST) | 0.0000001000000.0 | Synth_pep_30V_120502214048.1185.1185.2.dta |
| GPSGVSAQAQLXR 3 7 5 1 752  | 1 | 692.8493 | 1383.684 | 2 | 32.16 | 0.0028   | GPSGVSAQAQLK   | Phospho (ST) | 0.0000001000000.0 | Synth_pep_30V_120502214048.1186.1186.2.dta |
| GPSGVSAQAQLXR 5 4 3 0 1087 | 1 | 684.8363 | 1367.658 | 2 | 44.22 | 0.00019  | GPSGLVSAQAQLFR | Phospho (ST) | 0.0000001000000.0 | Synth_pep_30V_120502214048.1192.1192.2.dta |
| GPSGVSAQAQLXR 2 3 8 1 478  | 1 | 699.8367 | 1397.659 | 2 | 28.14 | 0.0097   | GPSGVSAQAQLVK  | Phospho (ST) | 0.0000001000000.0 | Synth_pep_30V_120502214048.1193.1193.2.dta |
| GPSGVSAQAQLXR 0 9 3 1 1884 | 1 | 702.8311 | 1403.648 | 2 | 43.76 | 0.00028  | GPSGAVSAQAQLFK | Phospho (ST) | 0.0000001000000.0 | Synth_pep_30V_120502214048.1194.1194.2.dta |
| GPSGVSAQAQLXR 3 9 9 1 800  | 1 | 748.8436 | 1495.673 | 2 | 39.48 | 0.00098  | GPSGVSAQAQLYK  | Phospho (ST) | 0.0000001000000.0 | Synth_pep_30V_120502214048.1195.1195.2.dta |
| GPSGVSAQAQLXR 1 8 5 1 372  | 1 | 675.8376 | 1349.661 | 2 | 45.35 | 0.00018  | GPSGVSAQAQLK   | Phospho (ST) | 0.0000001000000.0 | Synth_pep_30V_120502214048.1197.1197.2.dta |
| GPSGVSAQAQLXR 3 2 5 0 651  | 1 | 720.8463 | 1439.678 | 2 | 75.47 | 1.00E-07 | GPSGVSAQAQLR   | Phospho (ST) | 0.0000001000000.0 | Synth_pep_30V_120502214048.1198.1198.2.dta |
| GPSGVSAQAQLXR 3 7 5 0 751  | 1 | 706.8488 | 1411.683 | 2 | 62.55 | 2.00E-06 | GPSGVSAQAQLR   | Phospho (ST) | 0.0000001000000.0 | Synth_pep_30V_120502214048.1200.1200.2.dta |
| GPSGVSAQAQLXR 3 4 3 1 688  | 1 | 687.8251 | 1373.636 | 2 | 44.1  | 0.00028  | GPSGLVSAQAQLFK | Phospho (ST) | 0.0000001000000.0 | Synth_pep_30V_120502214048.1201.1201.2.dta |
| SXPFKXSPLXFR 0 5 1 0 1303  | 1 | 757.8719 | 1513.729 | 2 | 34.41 | 0.0031   | SAPFKVSPDFGR   | Phospho (ST) | 0.0000001000000.0 | Synth_pep_30V_120502214048.1203.1203.2.dta |
| GPSGVSAQAQLXR 3 9 9 0 799  | 1 | 765.8696 | 1529.725 | 2 | 41.15 | 0.00048  | SSPFKVSPLDFGR  | Phospho (ST) | 0.0000001000000.0 | Synth_pep_30V_120502214048.1204.1204.2.dta |
| GPSGVSAQAQLXR 6 8 3 1 1368 | 1 | 762.8467 | 1523.679 | 2 | 55.86 | 3.30E-05 | GPSGVSAQAQLYR  | Phospho (ST) | 0.0000001000000.0 | Synth_pep_30V_120502214048.1208.1208.2.dta |
| GPSGVSAQAQLXR 0 3 2 0 65   | 1 | 678.8309 | 1355.647 | 2 | 54.14 | 2.30E-05 | GPSGVSAQAQLFK  | Phospho (ST) | 0.0000001000000.0 | Synth_pep_30V_120502214048.1209.1209.2.dta |
| SXPFKXSPLXFR 0 3 2 0 65    | 1 | 781.8713 | 1561.728 | 2 | 32.06 | 0.0021   | SAPFKVSPLEFR   | Phospho (ST) | 0.0000001000000.0 | Synth_pep_30V_120502214048.1210.1210.2.dta |
| GPSGVSAQAQLXR 3 5 6 1 714  | 1 | 685.8387 | 1369.663 | 2 | 33.8  | 0.0024   | GPSGVSAQAQLSK  | Phospho (ST) | 0.0000001000000.0 | Synth_pep_30V_120502214048.1216.1216.2.dta |
| GPSGVSAQAQLXR 3 9 8 1 798  | 1 | 716.8483 | 1431.682 | 2 | 46.08 | 0.00013  | GPSGVSAQAQLVK  | Phospho (ST) | 0.0000001000000.0 | Synth_pep_30V_120502214048.1217.1217.2.dta |
| GPSGVSAQAQLXR 9 9 5 0 1991 | 1 | 745.8552 | 1489.696 | 2 | 44.33 | 0.00015  | GPSGVSAQAQLR   | Phospho (ST) | 0.0000001000000.0 | Synth_pep_30V_120502214048.1224.1224.2.dta |
| GPSGVSAQAQLXR 9 5 9 1 1920 | 1 | 731.8552 | 1461.696 | 2 | 38.55 | 0.00092  | GPSGLVSAQAQLYK | Phospho (ST) | 0.0000001000000.0 | Synth_pep_30V_120502214048.1226.1226.2.dta |
| GPSGVSAQAQLXR 5 4 5 0 1091 | 1 | 667.8437 | 1333.673 | 2 | 52.64 | 1.90E-05 | GPSGLVSAQAQLK  | Phospho (ST) | 0.0000001000000.0 | Synth_pep_30V_120502214048.1227.1227.2.dta |
| GPSGVSAQAQLXR 4 8 3 1 968  | 1 | 663.8259 | 1325.637 | 2 | 51.48 | 5.30E-05 | GPSGVSAQAQLFK  | Phospho (ST) | 0.0000001000000.0 | Synth_pep_30V_120502214048.1228.1228.2.dta |
| GPSGVSAQAQLXR 3 8 9 0 779  | 1 | 730.8494 | 1459.684 | 2 | 58.74 | 5.40E-06 | GPSGVSAQAQLYR  | Phospho (ST) | 0.0000001000000.0 | Synth_pep_30V_120502214048.1232.1232.2.dta |
| GPSGVSAQAQLXR 5 8 9 0 1179 | 1 | 713.8559 | 1425.704 | 2 | 53.44 | 9.50E-06 | GPSGLVSAQAQLYR | Phospho (ST) | 0.0000001000000.0 | Synth_pep_30V_120502214048.1233.1233.2.dta |
| GPSGVSAQAQLXR 5 5 1 0 1103 | 1 | 696.8473 | 1391.68  | 2 | 54.28 | 1.60E-05 | GPSGLVSAQAQLDR | Phospho (ST) | 0.0000001000000.0 | Synth_pep_30V_120502214048.1234.1234.2.dta |
| SXPFKXSPLXFR 1 5 2 0 305   | 1 | 786.8748 |          |   |       |          |                |              |                   |                                            |

|                        |   |          |          |   |       |          |               |              |                  |                                            |
|------------------------|---|----------|----------|---|-------|----------|---------------|--------------|------------------|--------------------------------------------|
| GPSGVXSAQXLR 4531 908  | 1 | 670.8334 | 1339.652 | 2 | 41.45 | 0.00064  | GPSGVSLAQLFK  | Phospho (ST) | 0.000001000000.0 | Synth_pep_30V_120502214048.1336.1336.2.dta |
| GPSGVXSAQXLR 3391 680  | 1 | 740.8459 | 1479.677 | 2 | 40.3  | 0.00088  | GPSGVFSAQLYK  | Phospho (ST) | 0.000001000000.0 | Synth_pep_30V_120502214048.1337.1337.2.dta |
| GPSGVXSAQXLR 3590 719  | 1 | 737.8572 | 1473.7   | 2 | 53.76 | 2.00E-05 | GPSGVFLAQLYR  | Phospho (ST) | 0.000001000000.0 | Synth_pep_30V_120502214048.1344.1344.2.dta |
| GPSGVXSAQXLR 5950 1191 | 1 | 720.8654 | 1439.716 | 2 | 60.13 | 1.50E-06 | GPSGVLSAQLLR  | Phospho (ST) | 0.000001000000.0 | Synth_pep_30V_120502214048.1345.1345.2.dta |
| GPSGVXSAQXLR 6530 1307 | 1 | 699.8394 | 1397.664 | 2 | 50.22 | 7.90E-05 | GPSGVSLAQLFK  | Phospho (ST) | 0.000001000000.0 | Synth_pep_30V_120502214048.1346.1346.2.dta |
| GPSGVXSAQXLR 2531 1508 | 1 | 706.8419 | 1411.669 | 2 | 45.9  | 5.00E-05 | GPSGVLSAQLFR  | Phospho (ST) | 0.000001000000.0 | Synth_pep_30V_120502214048.1352.1352.2.dta |
| GPSGVXSAQXLR 3390 679  | 1 | 754.8489 | 1507.683 | 2 | 69.03 | 9.90E-07 | GPSGVFSAQLYR  | Phospho (ST) | 0.000001000000.0 | Synth_pep_30V_120502214048.1353.1353.2.dta |
| GPSGVXSAQXLR 4331 1858 | 1 | 687.8252 | 1373.636 | 2 | 39.17 | 0.00087  | GPSGVVSAQLFK  | Phospho (ST) | 0.000001000000.0 | Synth_pep_30V_120502214048.1354.1354.2.dta |
| GPSGVXSAQXLR 5381 1078 | 1 | 691.8577 | 1381.701 | 2 | 42.8  | 0.00028  | GPSGLVSAQLVK  | Phospho (ST) | 0.000001000000.0 | Synth_pep_30V_120502214048.1360.1360.2.dta |
| GPSGVXSAQXLR 8830 1767 | 1 | 698.8513 | 1395.688 | 2 | 74.76 | 5.50E-08 | GPSGVVSAQLFR  | Phospho (ST) | 0.000001000000.0 | Synth_pep_30V_120502214048.1361.1361.2.dta |
| GPSGVXSAQXLR 7331 1468 | 1 | 709.8394 | 1417.664 | 2 | 32.05 | 0.0026   | GPSGTVSAQLFK  | Phospho (ST) | 0.000001000000.0 | Synth_pep_30V_120502214048.1362.1362.2.dta |
| GPSGVXSAQXLR 0331 168  | 1 | 694.8331 | 1387.652 | 2 | 40.01 | 0.00076  | GPSGAVSAQLFK  | Phospho (ST) | 0.000001000000.0 | Synth_pep_30V_120502214048.1368.1368.2.dta |
| GPSGVXSAQXLR 4330 867  | 1 | 701.8282 | 1401.642 | 2 | 67.92 | 4.00E-07 | GPSGGVSAQLFR  | Phospho (ST) | 0.000001000000.0 | Synth_pep_30V_120502214048.1369.1369.2.dta |
| GPSGVXSAQXLR 5850 1171 | 1 | 688.8677 | 1375.721 | 2 | 51.68 | 7.10E-06 | GPSGLVSAQLLR  | Phospho (ST) | 0.000001000000.0 | Synth_pep_30V_120502214048.1384.1384.2.dta |
| GPSGVXSAQXLR 0531 1108 | 1 | 677.8412 | 1353.668 | 2 | 44.48 | 0.00024  | GPSGAVSAQLFK  | Phospho (ST) | 0.000001000000.0 | Synth_pep_30V_120502214048.1385.1385.2.dta |
| GPSGVXSAQXLR 3580 717  | 1 | 705.8601 | 1409.706 | 2 | 62.95 | 5.10E-07 | GPSGVFLAQLVR  | Phospho (ST) | 0.000001000000.0 | Synth_pep_30V_120502214048.1392.1392.2.dta |
| GPSGVXSAQXLR 5851 1172 | 1 | 674.8652 | 1347.716 | 2 | 50.69 | 2.60E-05 | GPSGLVSAQLLR  | Phospho (ST) | 0.000001000000.0 | Synth_pep_30V_120502214048.1393.1393.2.dta |
| GPSGVXSAQXLR 0330 67   | 1 | 708.8347 | 1415.655 | 2 | 63.41 | 4.10E-06 | GPSGAVSAQLFK  | Phospho (ST) | 0.000001000000.0 | Synth_pep_30V_120502214048.1394.1394.2.dta |
| GPSGVXSAQXLR 5350 1071 | 1 | 712.869  | 1423.724 | 2 | 35.44 | 0.00029  | GPSGLVSAQLLR  | Phospho (ST) | 0.000001000000.0 | Synth_pep_30V_120502214048.1403.1403.2.dta |
| GPSGVXSAQXLR 9550 1911 | 1 | 720.865  | 1439.715 | 2 | 67.22 | 7.40E-07 | GPSGVVSAQLFR  | Phospho (ST) | 0.000001000000.0 | Synth_pep_30V_120502214048.1417.1417.2.dta |
| GPSGVXSAQXLR 9530 1907 | 1 | 737.8566 | 1473.699 | 2 | 53.31 | 2.20E-05 | GPSGVVSAQLFR  | Phospho (ST) | 0.000001000000.0 | Synth_pep_30V_120502214048.1433.1433.2.dta |
| GPSGVXSAQXLR 9330 1867 | 1 | 754.8492 | 1507.684 | 2 | 53.13 | 3.80E-05 | GPSGVVSAQLFR  | Phospho (ST) | 0.000001000000.0 | Synth_pep_30V_120502214048.1448.1448.2.dta |
| GPSGVXSAQXLR 8530 1707 | 1 | 705.8597 | 1409.705 | 2 | 67.47 | 5.40E-07 | GPSGVVSAQLFR  | Phospho (ST) | 0.000001000000.0 | Synth_pep_30V_120502214048.1464.1464.2.dta |
| GPSGVXSAQXLR 5351 1072 | 1 | 698.8646 | 1395.715 | 2 | 52.8  | 1.50E-05 | GPSGLVSAQLLK  | Phospho (ST) | 0.000001000000.0 | Synth_pep_30V_120502214048.1465.1465.2.dta |
| GPSGVXSAQXLR 8330 1667 | 1 | 732.8513 | 1443.688 | 2 | 72    | 2.00E-07 | GPSGVVSAQLFR  | Phospho (ST) | 0.000001000000.0 | Synth_pep_30V_120502214048.1466.1466.2.dta |
| GPSGVXSAQXLR 3831 768  | 1 | 708.8492 | 1415.684 | 2 | 45.31 | 0.00024  | GPSGFVSAQLFK  | Phospho (ST) | 0.000001000000.0 | Synth_pep_30V_120502214048.1467.1467.2.dta |
| GPSGVXSAQXLR 3351 672  | 1 | 715.8569 | 1429.699 | 2 | 35.77 | 0.0015   | GPSGVVSAQLLK  | Phospho (ST) | 0.000001000000.0 | Synth_pep_30V_120502214048.1473.1473.2.dta |
| GPSGVXSAQXLR 5551 1112 | 1 | 681.8724 | 1361.73  | 2 | 52.07 | 1.40E-05 | GPSGLVSAQLLK  | Phospho (ST) | 0.000001000000.0 | Synth_pep_30V_120502214048.1480.1480.2.dta |
| GPSGVXSAQXLR 3350 671  | 1 | 729.8595 | 1457.704 | 2 | 63.73 | 1.10E-06 | GPSGFVSAQLLR  | Phospho (ST) | 0.000001000000.0 | Synth_pep_30V_120502214048.1497.1497.2.dta |
| GPSGVXSAQXLR 3331 668  | 1 | 732.8492 | 1463.684 | 2 | 46.83 | 0.00017  | GPSGFVSAQLFK  | Phospho (ST) | 0.000001000000.0 | Synth_pep_30V_120502214048.1528.1528.2.dta |
| GPSGVXSAQXLR 3531 708  | 1 | 715.8572 | 1429.7   | 2 | 44.32 | 0.00021  | GPSGFVSAQLFK  | Phospho (ST) | 0.000001000000.0 | Synth_pep_30V_120502214048.1536.1536.2.dta |
| GPSGVXSAQXLR 5331 1108 | 1 | 698.8649 | 1395.715 | 2 | 44.43 | 0.00011  | GPSGLVSAQLFK  | Phospho (ST) | 0.000001000000.0 | Synth_pep_30V_120502214048.1537.1537.2.dta |
| GPSGVXSAQXLR 5330 1107 | 1 | 712.8676 | 1423.721 | 2 | 60.47 | 2.00E-06 | GPSGLVSAQLFR  | Phospho (ST) | 0.000001000000.0 | Synth_pep_30V_120502214048.1552.1552.2.dta |
| GPSGVXSAQXLR 3330 667  | 1 | 746.8514 | 1491.688 | 2 | 58.28 | 4.70E-06 | GPSGFVSAQLFR  | Phospho (ST) | 0.000001000000.0 | Synth_pep_30V_120502214048.1553.1553.2.dta |
| GPSGVXSAQXLR 3530 707  | 1 | 729.8579 | 1457.701 | 2 | 58.99 | 7.80E-06 | GPSGVFLAQLFR  | Phospho (ST) | 0.000001000000.0 | Synth_pep_30V_120502214048.1568.1568.2.dta |
| GPSGVXSAQXLR 5550 1111 | 1 | 695.8756 | 1389.737 | 2 | 36.7  | 0.00029  | GPSGLVSAQLLR  | Phospho (ST) | 0.000001000000.0 | Synth_pep_30V_120502214048.1570.1570.2.dta |
| GPSGVXSAQXLR 0621 126  | 1 | 655.8046 | 1309.595 | 2 | 31.33 | 0.0033   | GPSGAVSAQLFK  | Phospho (ST) | 0.000001000000.0 | Synth_pep_30V_120502214048.697.697.2.dta   |
| GPSGVXSAQXLR 2611 524  | 1 | 677.7996 | 1353.585 | 2 | 26.93 | 0.0033   | GPSGEVSAQLDK  | Phospho (ST) | 0.000001000000.0 | Synth_pep_30V_120502214048.698.698.2.dta   |
| GPSGVXSAQXLR 6461 1294 | 1 | 627.7894 | 1253.564 | 2 | 45.74 | 0.00015  | GPSGLVSAQLSK  | Phospho (ST) | 0.000001000000.0 | Synth_pep_30V_120502214048.704.704.2.dta   |
| GPSGVXSAQXLR 6661 1334 | 1 | 642.7945 | 1283.574 | 2 | 48.33 | 0.00022  | GPSGEVSAQLSK  | Phospho (ST) | 0.000001000000.0 | Synth_pep_30V_120502214048.705.705.2.dta   |
| GPSGVXSAQXLR 1070 215  | 1 | 669.804  | 1337.593 | 2 | 27.53 | 0.005    | GPSGDVSAQLTR  | Phospho (ST) | 0.000001000000.0 | Synth_pep_30V_120502214048.709.709.2.dta   |
| GPSGVXSAQXLR 6611 1324 | 1 | 656.7936 | 1311.573 | 2 | 39.26 | 0.00028  | GPSGAVSAQLDK  | Phospho (ST) | 0.000001000000.0 | Synth_pep_30V_120502214048.712.712.2.dta   |
| GPSGVXSAQXLR 0461 94   | 1 | 619.7937 | 1237.573 | 2 | 38.23 | 0.0008   | GPSGAVSAQLSK  | Phospho (ST) | 0.000001000000.0 | Synth_pep_30V_120502214048.714.714.2.dta   |
| GPSGVXSAQXLR 6061 1214 | 1 | 634.799  | 1267.584 | 2 | 32.66 | 0.0038   | GPSGLVSAQLSK  | Phospho (ST) | 0.000001000000.0 | Synth_pep_30V_120502214048.716.716.2.dta   |
| GPSGVXSAQXLR 6621 1326 | 1 | 663.8013 | 1325.588 | 2 | 29.84 | 0.0034   | GPSGAVSAQLFK  | Phospho (ST) | 0.000001000000.0 | Synth_pep_30V_120502214048.717.717.2.dta   |
| GPSGVXSAQXLR 1611 324  | 1 | 670.7916 | 1339.569 | 2 | 51.12 | 1.30E-05 | GPSGDVSAQLDK  | Phospho (ST) | 0.000001000000.0 | Synth_pep_30V_120502214048.720.720.2.dta   |
| GPSGVXSAQXLR 0441 90   | 1 | 604.7877 | 1207.561 | 2 | 41.27 | 7.50E-05 | GPSGAVSAQLGK  | Phospho (ST) | 0.000001000000.0 | Synth_pep_30V_120502214048.722.722.2.dta   |
| GPSGVXSAQXLR 4441 890  | 1 | 597.7797 | 1193.545 | 2 | 49.5  | 2.40E-05 | GPSGVSQAQLGK  | Phospho (ST) | 0.000001000000.0 | Synth_pep_30V_120502214048.723.723.2.dta   |
| GPSGVXSAQXLR 0401 82   | 1 | 611.796  | 1221.577 | 2 | 44.01 | 4.00E-05 | GPSGAVSAQLAK  | Phospho (ST) | 0.000001000000.0 | Synth_pep_30V_120502214048.728.728.2.dta   |
| GPSGVXSAQXLR 2111 424  | 1 | 691.7935 | 1381.573 | 2 | 41.82 | 0.00092  | GPSGEVSAQLDK  | Phospho (ST) | 0.000001000000.0 | Synth_pep_30V_120502214048.729.729.2.dta   |
| GPSGVXSAQXLR 0640 129  | 1 | 633.7933 | 1265.572 | 2 | 48.47 | 0.00013  | GPSGAVSAQLGR  | Phospho (ST) | 0.000001000000.0 | Synth_pep_30V_120502214048.736.736.2.dta   |
| GPSGVXSAQXLR 2620 525  | 1 | 698.8089 | 1395.603 | 2 | 55.1  | 1.80E-05 | GPSGEVSAQLER  | Phospho (ST) | 0.000001000000.0 | Synth_pep_30V_120502214048.738.738.2.dta   |
| GPSGVXSAQXLR 2110 423  | 1 | 705.7958 | 1409.577 | 2 | 55.68 | 6.60E-06 | GPSGEVSDAQLDR | Phospho (ST) | 0.000001000000.0 | Synth_pep_30V_120502214048.744.744.2.dta   |
| GPSGVXSAQXLR 2120 425  | 1 | 712.8039 | 1423.593 | 2 | 63.95 | 2.00E-06 | GPSGEVSDAQLER | Phospho (ST) | 0.000001000000.0 | Synth_pep_30V_120502214048.745.745.2.dta   |
| GPSGVXSAQXLR 0110 23   | 1 | 676.7927 | 1351.571 | 2 | 41.75 | 0.00028  | GPSGAVSDAQLDR | Phospho (ST) | 0.000001000000.0 | Synth_pep_30V_120502214048.752.752.2.dta   |
| GPSGVXSAQXLR 0410 83   | 1 | 647.7916 | 1293.569 | 2 | 48.58 | 0.00013  | GPSGAVSAQLDR  | Phospho (ST) | 0.000001000000.0 | Synth_pep_30V_120502214048.760.760.2.dta   |
| GPSGVXSAQXLR 2010 403  | 1 | 683.8024 | 1365.59  | 2 | 42.77 | 0.00031  | GPSGEVSAQLDR  | Phospho (ST) | 0.000001000000.0 | Synth_pep_30V_120502214048.761.761.2.dta   |
| GPSGVXSAQXLR 4040 809  | 1 | 618.7895 | 1235.565 | 2 | 43.76 | 0.00073  | GPSGVSAAQLGR  | Phospho (ST) | 0.000001000000.0 | Synth_pep_30V_120502214048.762.762.2.dta   |
| GPSGVXSAQXLR 2220 445  | 1 | 719.8126 | 1437.611 | 2 | 69.09 | 7.20E-07 | GPSGEVSEQLER  | Phospho (ST) | 0.000001000000.0 | Synth_pep_30V_120502214048.763.763.2.dta   |
| GPSGVXSAQXLR 6681 1338 | 1 | 648.8136 | 1295.613 | 2 | 37.86 | 0.00064  | GPSGVVSAQLVK  | Phospho (ST) | 0.000001000000.0 | Synth_pep_30V_120502214048.768.768.2.dta   |
| GPSGVXSAQXLR 0040 9    | 1 | 625.7975 | 1249.58  | 2 | 56.01 | 1.40E-05 | GPSGAVSAQLGR  | Phospho (ST) | 0.000001000000.0 | Synth_pep_30V_120502214048.769.769.2.dta   |
| GPSGVXSAQXLR 9461 1894 | 1 | 665.8062 | 1329.598 | 2 | 42.9  | 0.00035  | GPSGVVSAQLSK  | Phospho (ST) | 0.000001000000.0 | Synth_pep_30V_120502214048.770.770.2.dta   |
| GPSGVXSAQXLR 0420 85   | 1 | 654.7998 | 1307.585 | 2 | 46.15 | 0.00013  | GPSGAVSAQLER  | Phospho (ST) | 0.000001000000.0 | Synth_pep_30V_120502214048.776.776.2.dta   |
| GPSGVXSAQXLR 1021 206  | 1 | 669.8027 | 1337.591 | 2 | 47.51 | 8.80E-05 | GPSGDVSAQLGK  | Phospho (ST) | 0.000001000000.0 | Synth_pep_30V_120502214048.777.777.2.dta   |
| GPSGVXSAQXLR 1011 204  | 1 | 662.7899 | 1323.565 | 2 | 40.39 | 0.00078  | GPSGDVSAQLDK  | Phospho (ST) | 0.000001000000.0 | Synth_pep_30V_120502214048.778.778.2.dta   |
| GPSGVXSAQXLR 9441 1890 | 1 | 650.7994 | 1299.584 | 2 | 46.96 | 0.00015  | GPSGVVSAQLGK  | Phospho (ST) | 0.000001000000.0 | Synth_pep_30V_120502214048.784.784.2.dta   |
| GPSGVXSAQXLR 9421 1886 | 1 | 686.8093 | 1371.604 | 2 | 38.21 | 0.00072  | GPSGVVSAQLGK  | Phospho (ST) | 0.000001000000.0 | Synth_pep_30V_120502214048.785.785.2.dta   |
| GPSGVXSAQXLR 9401 1882 | 1 | 657.8075 | 1313.6   | 2 | 50.64 | 5.70E-05 | GPSGAVSAQLAK  | Phospho (ST) | 0.000001000000.0 | Synth_pep_30V_120502214048.786.786.2.dta   |
| GPSGVXSAQXLR 9411 1884 | 1 | 679.8049 | 1357.595 | 2 | 48.04 | 7.10E-05 | GPSGVVSAQLDK  | Phospho (ST) | 0.000001000000.0 | Synth_pep_30V_120502214048.792.792.2.dta   |
| GPSGVXSAQXLR 0691 140  | 1 | 672.8132 | 1343.612 | 2 | 34.23 | 0.005    | GPSGAVSAQLYK  | Phospho (ST) | 0.000001000000.0 | Synth_pep_30V_120502214048.793.793.2.dta   |
| GPSGVXSAQXLR 2020 405  | 1 | 690.8118 | 1379.609 | 2 | 47.73 | 7.80E-05 | GPSGEVSAQLER  | Phospho (ST) | 0.000001000000.0 | Synth_pep_30V_120502214048.794.794.2.dta   |
| GPSGVXSAQXLR 0480 97   | 1 | 639.8129 | 1277.611 | 2 | 66.44 | 2.60E-06 | GPSGAVSAQLVR  | Phospho (ST) | 0.000001000000.0 | Synth_pep_30V_120502214048.800.800.2.dta   |
| GPSGVXSAQXLR 9671 1936 | 1 | 687.8179 | 1373.621 | 2 | 33.01 | 0.0084   | GPSGVVSAQLTK  | Phospho (ST) | 0.000001000000.0 | Synth_pep_30V_120502214048.801.801.2.dta   |
| GPSGVXSAQXLR 8440 1689 | 1 | 632.8049 | 1263.595 | 2 | 53.46 | 3.70E-05 | GPSGVVSAQLGR  | Phospho (ST) | 0.000001000000.0 | Synth_pep_30V_120502214048.802.802.2.dta   |
| GPSGVXSAQXLR 1911 384  | 1 |          |          |   |       |          |               |              |                  |                                            |

|                           |   |          |          |   |       |          |                |              |                   |                                          |
|---------------------------|---|----------|----------|---|-------|----------|----------------|--------------|-------------------|------------------------------------------|
| GPSGVXSAQXLR 9 6 9 1 1940 | 1 | 718.8248 | 1435.635 | 2 | 48.37 | 1.50E-05 | GPSGVYSAQLYK   | Phospho (ST) | 0.0000001000000.0 | Synth_pep_30V_120502214048.899.899.2.dta |
| GPSGVXSAQXLR 0 4 5 0 91   | 1 | 646.8209 | 1291.627 | 2 | 77.98 | 3.60E-08 | GPSGAVSQAQLLR  | Phospho (ST) | 0.0000001000000.0 | Synth_pep_30V_120502214048.912.912.2.dta |
| SXPFKXSPLXFR 7 6 2 0 1525 | 1 | 766.8594 | 1531.704 | 2 | 42.41 | 0.0002   | STPFKSPLEFGR   | Phospho (ST) | 0.0000001000000.0 | Synth_pep_30V_120502214048.913.913.2.dta |
| GPSGVXSAQXLR 3 4 0 1 682  | 1 | 649.8101 | 1297.606 | 2 | 42.25 | 0.00039  | GPSGVSQAQLAK   | Phospho (ST) | 0.0000001000000.0 | Synth_pep_30V_120502214048.915.915.2.dta |
| SXPFKXSPLXFR 6 6 2 0 1325 | 1 | 759.8521 | 1517.69  | 2 | 57.83 | 5.20E-06 | SPFKSPLEFGR    | Phospho (ST) | 0.0000001000000.0 | Synth_pep_30V_120502214048.916.916.2.dta |
| SXPFKXSPLXFR 6 6 6 0 1333 | 1 | 738.8456 | 1475.677 | 2 | 43.28 | 0.00017  | STPFKSPLEFGR   | Phospho (ST) | 0.0000001000000.0 | Synth_pep_30V_120502214048.921.921.2.dta |
| GPSGVXSAQXLR 5 0 6 1 1014 | 1 | 647.8229 | 1293.631 | 2 | 39.03 | 0.00045  | GPSGLVSAQAQLSK | Phospho (ST) | 0.0000001000000.0 | Synth_pep_30V_120502214048.928.928.2.dta |
| GPSGVXSAQXLR 2 8 2 0 565  | 1 | 704.8258 | 1407.637 | 2 | 44.47 | 0.00025  | GPSGVYSAQQLER  | Phospho (ST) | 0.0000001000000.0 | Synth_pep_30V_120502214048.929.929.2.dta |
| GPSGVXSAQXLR 6 5 4 4 1310 | 1 | 640.815  | 1279.616 | 2 | 56.23 | 7.10E-06 | GPSGLVSAQAQLGK | Phospho (ST) | 0.0000001000000.0 | Synth_pep_30V_120502214048.930.930.2.dta |
| GPSGVXSAQXLR 3 6 0 0 721  | 1 | 678.8169 | 1355.619 | 2 | 73.5  | 2.20E-07 | GPSGVYSAQQLAR  | Phospho (ST) | 0.0000001000000.0 | Synth_pep_30V_120502214048.931.931.2.dta |
| SXPFKXSPLXFR 0 2 2 0 45   | 1 | 772.8589 | 1543.703 | 2 | 50.05 | 5.00E-05 | SAPFKSPLEFGR   | Phospho (ST) | 0.0000001000000.0 | Synth_pep_30V_120502214048.932.932.2.dta |
| GPSGVXSAQXLR 5 1 1 1 1024 | 1 | 683.8145 | 1365.614 | 2 | 38.11 | 0.00066  | GPSGLVSAQAQLDK | Phospho (ST) | 0.0000001000000.0 | Synth_pep_30V_120502214048.934.934.2.dta |
| GPSGVXSAQXLR 5 1 0 0 1021 | 1 | 675.8218 | 1349.629 | 2 | 46.78 | 0.00014  | GPSGLVSAQAQLAR | Phospho (ST) | 0.0000001000000.0 | Synth_pep_30V_120502214048.936.936.2.dta |
| GPSGVXSAQXLR 9 2 9 1 1860 | 1 | 739.8289 | 1477.643 | 2 | 29.69 | 0.00034  | GPSGVYSAQLYK   | Phospho (ST) | 0.0000001000000.0 | Synth_pep_30V_120502214048.939.939.2.dta |
| GPSGVXSAQXLR 3 7 4 1 750  | 1 | 664.8152 | 1327.616 | 2 | 43.17 | 0.00028  | GPSGFVSTAQLGK  | Phospho (ST) | 0.0000001000000.0 | Synth_pep_30V_120502214048.940.940.2.dta |
| SXPFKXSPLXFR 7 2 2 0 1445 | 1 | 787.8644 | 1573.714 | 2 | 34.12 | 0.0017   | STPFKSPLEFGR   | Phospho (ST) | 0.0000001000000.0 | Synth_pep_30V_120502214048.941.941.2.dta |
| GPSGVXSAQXLR 6 5 1 1 1304 | 1 | 669.8195 | 1337.624 | 2 | 39.23 | 0.00047  | GPSGLVSAQAQLDK | Phospho (ST) | 0.0000001000000.0 | Synth_pep_30V_120502214048.944.944.2.dta |
| SXPFKXSPLXFR 7 1 2 0 1425 | 1 | 780.8563 | 1559.698 | 2 | 32.33 | 0.0021   | STPFKSPLEFGR   | Phospho (ST) | 0.0000001000000.0 | Synth_pep_30V_120502214048.945.945.2.dta |
| GPSGVXSAQXLR 9 1 9 1 1840 | 1 | 732.8246 | 1463.635 | 2 | 28.43 | 0.00075  | GPSGVYSAQLYK   | Phospho (ST) | 0.0000001000000.0 | Synth_pep_30V_120502214048.946.946.2.dta |
| GPSGVXSAQXLR 1 4 5 1 292  | 1 | 654.8115 | 1307.608 | 2 | 48.73 | 6.80E-05 | GPSGDVSAQAQLK  | Phospho (ST) | 0.0000001000000.0 | Synth_pep_30V_120502214048.947.947.2.dta |
| GPSGVXSAQXLR 5 0 1 1 1004 | 1 | 661.8221 | 1321.63  | 2 | 38.54 | 0.00088  | GPSGLVSAQAQLDK | Phospho (ST) | 0.0000001000000.0 | Synth_pep_30V_120502214048.948.948.2.dta |
| GPSGVXSAQXLR 9 8 6 1 1974 | 1 | 686.8287 | 1371.643 | 2 | 33.06 | 0.00052  | GPSGVYSAQAQLSK | Phospho (ST) | 0.0000001000000.0 | Synth_pep_30V_120502214048.952.952.2.dta |
| GPSGVXSAQXLR 4 5 4 1 910  | 1 | 625.8096 | 1249.605 | 2 | 43.05 | 6.70E-05 | GPSGLVSAQAQLGK | Phospho (ST) | 0.0000001000000.0 | Synth_pep_30V_120502214048.953.953.2.dta |
| GPSGVXSAQXLR 6 4 3 1 1288 | 1 | 657.8073 | 1313.6   | 2 | 37.58 | 0.0012   | GPSGVYSAQAQLK  | Phospho (ST) | 0.0000001000000.0 | Synth_pep_30V_120502214048.956.956.2.dta |
| GPSGVXSAQXLR 3 2 1 1 644  | 1 | 707.813  | 1413.612 | 2 | 53.82 | 1.70E-05 | GPSGLVSAQAQLDK | Phospho (ST) | 0.0000001000000.0 | Synth_pep_30V_120502214048.958.958.2.dta |
| GPSGVXSAQXLR 5 0 2 1 1006 | 1 | 668.83   | 1335.646 | 2 | 32.77 | 0.00031  | GPSGLVSAQAQLK  | Phospho (ST) | 0.0000001000000.0 | Synth_pep_30V_120502214048.961.961.2.dta |
| GPSGVXSAQXLR 8 9 1 1 1784 | 1 | 700.829  | 1399.644 | 2 | 58.27 | 7.40E-06 | GPSGVYSAQAQLDK | Phospho (ST) | 0.0000001000000.0 | Synth_pep_30V_120502214048.962.962.2.dta |
| SXPFKXSPLXFR 7 0 2 0 1405 | 1 | 758.862  | 1515.709 | 2 | 47.29 | 0.00011  | STPFKSPLEFGR   | Phospho (ST) | 0.0000001000000.0 | Synth_pep_30V_120502214048.963.963.2.dta |
| GPSGVXSAQXLR 9 4 9 0 1899 | 1 | 717.8234 | 1433.632 | 2 | 63.56 | 2.80E-06 | GPSGVYSAQAQLYR | Phospho (ST) | 0.0000001000000.0 | Synth_pep_30V_120502214048.966.966.2.dta |
| GPSGVXSAQXLR 4 9 8 1 998  | 1 | 671.8246 | 1341.635 | 2 | 38.06 | 0.00061  | GPSGVYSAQAQLK  | Phospho (ST) | 0.0000001000000.0 | Synth_pep_30V_120502214048.968.968.2.dta |
| GPSGVXSAQXLR 9 0 9 1 1820 | 1 | 710.8279 | 1419.641 | 2 | 42.88 | 0.00036  | GPSGVYSAQAQLYK | Phospho (ST) | 0.0000001000000.0 | Synth_pep_30V_120502214048.969.969.2.dta |
| GPSGVXSAQXLR 1 5 2 1 306  | 1 | 690.8237 | 1379.633 | 2 | 41.16 | 0.00046  | GPSGDVSAQAQLK  | Phospho (ST) | 0.0000001000000.0 | Synth_pep_30V_120502214048.970.970.2.dta |
| GPSGVXSAQXLR 1 9 9 0 399  | 1 | 746.8256 | 1491.637 | 2 | 56.98 | 7.00E-06 | GPSGVYSAQAQLYR | Phospho (ST) | 0.0000001000000.0 | Synth_pep_30V_120502214048.971.971.2.dta |
| GPSGVXSAQXLR 0 5 4 1 110  | 1 | 632.8176 | 1263.621 | 2 | 47.61 | 4.40E-05 | GPSGAVSQAQLGK  | Phospho (ST) | 0.0000001000000.0 | Synth_pep_30V_120502214048.972.972.2.dta |
| GPSGVXSAQXLR 2 9 9 0 599  | 1 | 753.833  | 1505.652 | 2 | 47.67 | 2.10E-05 | GPSGVYSAQAQLYR | Phospho (ST) | 0.0000001000000.0 | Synth_pep_30V_120502214048.976.976.2.dta |
| GPSGVXSAQXLR 1 5 1 0 303  | 1 | 697.8157 | 1393.617 | 2 | 61.73 | 3.40E-05 | GPSGDVSAQAQLDR | Phospho (ST) | 0.0000001000000.0 | Synth_pep_30V_120502214048.978.978.2.dta |
| GPSGVXSAQXLR 0 9 9 0 199  | 1 | 724.8311 | 1447.648 | 2 | 50.87 | 5.60E-05 | GPSGVYSAQAQLYR | Phospho (ST) | 0.0000001000000.0 | Synth_pep_30V_120502214048.984.984.2.dta |
| GPSGVXSAQXLR 5 0 2 0 1005 | 1 | 682.8312 | 1363.648 | 2 | 43.88 | 0.00012  | GPSGLVSAQAQLER | Phospho (ST) | 0.0000001000000.0 | Synth_pep_30V_120502214048.985.985.2.dta |
| SXPFKXSPLXFR 0 0 1 0 3    | 1 | 736.8488 | 1471.683 | 2 | 33.87 | 0.0022   | SAPFKASPLDFGR  | Phospho (ST) | 0.0000001000000.0 | Synth_pep_30V_120502214048.986.986.2.dta |
| GPSGVXSAQXLR 5 0 0 1 1002 | 1 | 639.8264 | 1277.638 | 2 | 38.91 | 0.00035  | GPSGLVSAQAQLAK | Phospho (ST) | 0.0000001000000.0 | Synth_pep_30V_120502214048.987.987.2.dta |
| SXPFKXSPLXFR 7 0 1 0 1403 | 1 | 751.8541 | 1501.694 | 2 | 46.49 | 0.00016  | STPFKASPLDFGR  | Phospho (ST) | 0.0000001000000.0 | Synth_pep_30V_120502214048.992.992.2.dta |
| GPSGVXSAQXLR 4 3 4 1 870  | 1 | 642.8019 | 1283.589 | 2 | 41.38 | 0.00029  | GPSGVYSAQAQLGK | Phospho (ST) | 0.0000001000000.0 | Synth_pep_30V_120502214048.993.993.2.dta |
| GPSGVXSAQXLR 5 0 0 0 1001 | 1 | 653.8297 | 1305.645 | 2 | 71.36 | 7.30E-08 | GPSGLVSAQAQLAR | Phospho (ST) | 0.0000001000000.0 | Synth_pep_325V_1000.1000.2.dta           |
| GPSGVXSAQXLR 8 8 2 0 1765 | 1 | 689.8404 | 1377.666 | 2 | 71.31 | 2.50E-07 | GPSGVYSAQAQLER | Phospho (ST) | 0.0000001000000.0 | Synth_pep_325V_1001.1001.2.dta           |
| SXPFKXSPLXFR 6 0 1 0 1203 | 1 | 744.8475 | 1487.681 | 2 | 42.23 | 0.00035  | STPFKASPLDFGR  | Phospho (ST) | 0.0000001000000.0 | Synth_pep_325V_1002.1002.2.dta           |
| GPSGVXSAQXLR 9 2 2 1 1986 | 1 | 739.8347 | 1477.655 | 2 | 34.86 | 0.00018  | GPSGVYSAQAQLK  | Phospho (ST) | 0.0000001000000.0 | Synth_pep_325V_1007.1007.2.dta           |
| GPSGVXSAQXLR 1 9 8 1 398  | 1 | 700.8295 | 1399.645 | 2 | 33.17 | 0.00027  | GPSGDVSAQAQLVK | Phospho (ST) | 0.0000001000000.0 | Synth_pep_325V_1016.1016.2.dta           |
| GPSGVXSAQXLR 2 3 1 1 464  | 1 | 707.8154 | 1413.616 | 2 | 29.56 | 0.00054  | GPSGVYSAQAQLDK | Phospho (ST) | 0.0000001000000.0 | Synth_pep_325V_1024.1024.2.dta           |
| GPSGVXSAQXLR 5 2 1 0 1043 | 1 | 704.8271 | 1407.64  | 2 | 38.12 | 0.00098  | GPSGLVSAQAQLGK | Phospho (ST) | 0.0000001000000.0 | Synth_pep_325V_1026.1026.2.dta           |
| GPSGVXSAQXLR 2 5 0 0 501  | 1 | 682.8298 | 1363.645 | 2 | 38.12 | 0.00077  | GPSGVSQAQLAR   | Phospho (ST) | 0.0000001000000.0 | Synth_pep_325V_1031.1031.2.dta           |
| GPSGVXSAQXLR 0 8 8 0 177  | 1 | 660.8375 | 1319.661 | 2 | 65.37 | 4.80E-07 | GPSGAVSQAQLVR  | Phospho (ST) | 0.0000001000000.0 | Synth_pep_325V_1033.1033.2.dta           |
| GPSGVXSAQXLR 0 3 2 0 65   | 1 | 699.824  | 1397.633 | 2 | 57.47 | 7.30E-06 | GPSGAVSQAQLER  | Phospho (ST) | 0.0000001000000.0 | Synth_pep_325V_1034.1034.2.dta           |
| GPSGVXSAQXLR 2 1 3 0 427  | 1 | 721.8159 | 1441.617 | 2 | 44.72 | 7.40E-05 | GPSGLVSAQAQLFR | Phospho (ST) | 0.0000001000000.0 | Synth_pep_325V_1035.1035.2.dta           |
| GPSGVXSAQXLR 0 8 0 1 162  | 1 | 632.8184 | 1263.622 | 2 | 49.77 | 2.70E-05 | GPSGAVSQAQLAK  | Phospho (ST) | 0.0000001000000.0 | Synth_pep_325V_1037.1037.2.dta           |
| GPSGVXSAQXLR 5 8 6 1 1174 | 1 | 661.8406 | 1321.667 | 2 | 37.68 | 0.00095  | GPSGLVSAQAQLSK | Phospho (ST) | 0.0000001000000.0 | Synth_pep_325V_1039.1039.2.dta           |
| GPSGVXSAQXLR 0 3 1 1 64   | 1 | 678.8139 | 1355.613 | 2 | 32.66 | 0.00054  | GPSGAVSQAQLDK  | Phospho (ST) | 0.0000001000000.0 | Synth_pep_325V_1040.1040.2.dta           |
| GPSGVXSAQXLR 9 9 9 1 2000 | 1 | 756.8416 | 1511.669 | 2 | 38.27 | 0.00085  | GPSGVYSAQAQLYK | Phospho (ST) | 0.0000001000000.0 | Synth_pep_325V_1041.1041.2.dta           |
| GPSGVXSAQXLR 2 5 7 0 515  | 1 | 697.8369 | 1393.659 | 2 | 44.95 | 0.00012  | GPSGVSQAQLTR   | Phospho (ST) | 0.0000001000000.0 | Synth_pep_325V_1042.1042.2.dta           |
| GPSGVXSAQXLR 5 2 8 0 1057 | 1 | 696.8481 | 1391.682 | 2 | 62.36 | 3.20E-06 | GPSGLVSAQAQLVR | Phospho (ST) | 0.0000001000000.0 | Synth_pep_325V_1047.1047.2.dta           |
| GPSGVXSAQXLR 9 3 6 1 1874 | 1 | 710.8292 | 1419.644 | 2 | 36.83 | 0.0015   | GPSGVYSAQAQLSK | Phospho (ST) | 0.0000001000000.0 | Synth_pep_325V_1048.1048.2.dta           |
| GPSGVXSAQXLR 0 3 7 1 76   | 1 | 671.8225 | 1341.635 | 2 | 34.47 | 0.0014   | GPSGAVSQAQLTK  | Phospho (ST) | 0.0000001000000.0 | Synth_pep_325V_1049.1049.2.dta           |
| GPSGVXSAQXLR 0 3 0 0 61   | 1 | 670.8218 | 1339.629 | 2 | 56.8  | 6.60E-06 | GPSGAVSQAQLAR  | Phospho (ST) | 0.0000001000000.0 | Synth_pep_325V_1055.1055.2.dta           |
| GPSGVXSAQXLR 8 9 9 1 1800 | 1 | 724.8452 | 1447.676 | 2 | 33.54 | 0.00048  | GPSGVYSAQAQLYK | Phospho (ST) | 0.0000001000000.0 | Synth_pep_325V_1056.1056.2.dta           |
| GPSGVXSAQXLR 0 3 2 1 66   | 1 | 685.8195 | 1369.624 | 2 | 32.45 | 0.00029  | GPSGAVSQAQLK   | Phospho (ST) | 0.0000001000000.0 | Synth_pep_325V_1057.1057.2.dta           |
| GPSGVXSAQXLR 9 2 5 0 1851 | 1 | 728.8456 | 1455.677 | 2 | 58.35 | 4.20E-06 | GPSGVYSAQAQLLR | Phospho (ST) | 0.0000001000000.0 | Synth_pep_325V_1058.1058.2.dta           |
| GPSGVXSAQXLR 2 3 2 1 466  | 1 | 714.8257 | 1427.637 | 2 | 50.31 | 1.50E-05 | GPSGVYSAQAQLK  | Phospho (ST) | 0.0000001000000.0 | Synth_pep_325V_1059.1059.2.dta           |
| GPSGVXSAQXLR 9 9 9 0 1999 | 1 | 770.8449 | 1539.675 | 2 | 66.56 | 9.90E-07 | GPSGVYSAQAQLYR | Phospho (ST) | 0.0000001000000.0 | Synth_pep_325V_1060.1060.2.dta           |
| GPSGVXSAQXLR 0 0 3 1 18   | 1 | 656.8191 | 1311.624 | 2 | 41.67 | 0.00026  | GPSGAVSQAQLFK  | Phospho (ST) | 0.0000001000000.0 | Synth_pep_325V_1063.1063.2.dta           |
| GPSGVXSAQXLR 0 8 8 1 178  | 1 | 646.8361 | 1291.658 | 2 | 54.58 | 1.80E-05 | GPSGAVSQAQLVK  | Phospho (ST) | 0.0000001000000.0 | Synth_pep_325V_1064.1064.2.dta           |
| GPSGVXSAQXLR 0 4 3 1 88   | 1 | 649.8105 | 1297.606 | 2 | 28.53 | 0.00093  | GPSGAVSQAQLFK  | Phospho (ST) | 0.0000001000000.0 | Synth_pep_325V_1065.1065.2.dta           |
| GPSGVXSAQXLR 8 6 3 0 1727 | 1 | 692.8348 | 1383.655 | 2 | 35.93 | 0.00069  | GPSGVYSAQAQLFR | Phospho (ST) | 0.0000001000000.0 | Synth_pep_325V_1071.1071.2.dta           |
| GPSGVXSAQXLR 5 0 8 1 1018 | 1 | 653.844  | 1305.673 | 2 | 51.44 | 3.10E-05 | GPSGLVSAQAQLVK | Phospho (ST) | 0.0000001000000.0 | Synth_pep_325V_1072.1072.2.dta           |
| GPSGVXSAQXLR 8 9 9 0 1799 | 1 | 738.8478 | 1475.681 | 2 | 53.33 | 1.90E-05 | GPSGVYSAQAQLYR | Phospho (ST) | 0.0000001000000.0 | Synth_pep_325V_1073.1073.2.dta           |
| GPSGVXSAQXLR 3 2 8 0 657  | 1 | 713.8405 | 1425.666 | 2 | 55.72 | 1.10E-05 | GPSGFVSAQAQLVR | Phospho (ST) | 0.0000001000000.0 | Synth_pep_325V_1075.1075.2.dta           |
| GPSGVXSAQXLR 3 2 9 0 659  | 1 | 745.8376 | 1489.    |   |       |          |                |              |                   |                                          |

|                         |   |          |          |   |       |          |               |              |                   |                                |
|-------------------------|---|----------|----------|---|-------|----------|---------------|--------------|-------------------|--------------------------------|
| GPSGXVSAQXLR 1581 318   | 1 | 675.839  | 1349.664 | 2 | 39.29 | 0.00072  | GPSGDVSLAQLVK | Phospho (ST) | 0.0000001000000.0 | Synth_pep_325V.1162.1162.2.dta |
| GPSGXVSAQXLR 2380 477   | 1 | 713.8397 | 1425.665 | 2 | 66.63 | 7.50E-07 | GPSGVSFAQLVR  | Phospho (ST) | 0.0000001000000.0 | Synth_pep_325V.1163.1163.2.dta |
| GPSGXVSAQXLR 3250 651   | 1 | 720.8472 | 1439.68  | 2 | 78.69 | 4.00E-08 | GPSGFVSEAQLLR | Phospho (ST) | 0.0000001000000.0 | Synth_pep_325V.1164.1164.2.dta |
| GPSGXVSAQXLR 2391 480   | 1 | 731.8311 | 1461.648 | 2 | 32.12 | 0.002    | GPSGVSFAQLYK  | Phospho (ST) | 0.0000001000000.0 | Synth_pep_325V.1167.1167.2.dta |
| GPSGXVSAQXLR 5981 1198  | 1 | 699.8569 | 1397.699 | 2 | 46.99 | 9.90E-05 | GPSGLVSYAQLVK | Phospho (ST) | 0.0000001000000.0 | Synth_pep_325V.1175.1175.2.dta |
| GPSGXVSAQXLR 3990 799   | 1 | 762.8478 | 1523.681 | 2 | 66.5  | 1.50E-06 | GPSGFVSYAQLYR | Phospho (ST) | 0.0000001000000.0 | Synth_pep_325V.1176.1176.2.dta |
| GPSGXVSAQXLR 8980 1797  | 1 | 706.8505 | 1411.687 | 2 | 34.57 | 0.00023  | GPSGVVSYAQLVR | Phospho (ST) | 0.0000001000000.0 | Synth_pep_325V.1177.1177.2.dta |
| GPSGXVSAQXLR 5560 1113  | 1 | 682.8501 | 1363.686 | 2 | 40.08 | 0.00023  | GPSGLVSLAQLSR | Phospho (ST) | 0.0000001000000.0 | Synth_pep_325V.1183.1183.2.dta |
| GPSGXVSAQXLR 0850 171   | 1 | 667.8454 | 1333.676 | 2 | 69.45 | 2.20E-07 | GPSGAVSAQLLR  | Phospho (ST) | 0.0000001000000.0 | Synth_pep_325V.1184.1184.2.dta |
| GPSGXVSAQXLR 6830 1368  | 1 | 678.8324 | 1355.65  | 2 | 49.32 | 5.60E-05 | GPSGVSVAQLFK  | Phospho (ST) | 0.0000001000000.0 | Synth_pep_325V.1185.1185.2.dta |
| GPSGXVSAQXLR 9391 1880  | 1 | 748.8448 | 1495.675 | 2 | 43.34 | 0.00044  | GPSGVVFAQLYK  | Phospho (ST) | 0.0000001000000.0 | Synth_pep_325V.1191.1191.2.dta |
| GPSGXVSAQXLR 4830 1968  | 1 | 663.8268 | 1325.639 | 2 | 50.08 | 7.40E-05 | GPSGVSVAQLFK  | Phospho (ST) | 0.0000001000000.0 | Synth_pep_325V.1193.1193.2.dta |
| GPSGXVSAQXLR 3980 797   | 1 | 730.8503 | 1459.686 | 2 | 68.61 | 5.70E-07 | GPSGFVSYAQLVR | Phospho (ST) | 0.0000001000000.0 | Synth_pep_325V.1199.1199.2.dta |
| GPSGXVSAQXLR 3560 1714  | 1 | 685.8397 | 1369.665 | 2 | 33.75 | 0.0026   | GPSGFVSLAQLSK | Phospho (ST) | 0.0000001000000.0 | Synth_pep_325V.1200.1200.2.dta |
| GPSGXVSAQXLR 2850 571   | 1 | 696.8481 | 1391.682 | 2 | 52.06 | 3.40E-05 | GPSGVSVAQLLR  | Phospho (ST) | 0.0000001000000.0 | Synth_pep_325V.1201.1201.2.dta |
| GPSGXVSAQXLR 5050 1011  | 1 | 674.8532 | 1347.692 | 2 | 81.11 | 7.70E-09 | GPSGLVSAQLLR  | Phospho (ST) | 0.0000001000000.0 | Synth_pep_325V.1208.1208.2.dta |
| GPSGXVSAQXLR 3980 1798  | 1 | 716.8493 | 1431.684 | 2 | 37.37 | 0.00096  | GPSGFVSYAQLVK | Phospho (ST) | 0.0000001000000.0 | Synth_pep_325V.1210.1210.2.dta |
| GPSGXVSAQXLR 3730 1748  | 1 | 709.841  | 1417.668 | 2 | 37.38 | 0.00088  | GPSGFVSTAQLFK | Phospho (ST) | 0.0000001000000.0 | Synth_pep_325V.1212.1212.2.dta |
| GPSGXVSAQXLR 3230 1648  | 1 | 723.8369 | 1445.659 | 2 | 45.31 | 0.00015  | GPSGFVSEAQLFK | Phospho (ST) | 0.0000001000000.0 | Synth_pep_325V.1215.1215.2.dta |
| GPSGXVSAQXLR 5880 1177  | 1 | 681.8614 | 1361.708 | 2 | 63.7  | 4.50E-07 | GPSGLVSYAQLVR | Phospho (ST) | 0.0000001000000.0 | Synth_pep_325V.1216.1216.2.dta |
| GPSGXVSAQXLR 3340 1670  | 1 | 687.8267 | 1373.639 | 2 | 35.77 | 0.0024   | GPSGFVFAQLGK  | Phospho (ST) | 0.0000001000000.0 | Synth_pep_325V.1217.1217.2.dta |
| GPSGXVSAQXLR 5450 11092 | 1 | 653.8431 | 1305.672 | 2 | 39.64 | 0.00047  | GPSGLVSGAQLLK | Phospho (ST) | 0.0000001000000.0 | Synth_pep_325V.1218.1218.2.dta |
| GPSGXVSAQXLR 6550 1312  | 1 | 668.8481 | 1335.682 | 2 | 36.75 | 0.0013   | GPSGVSVAQLLK  | Phospho (ST) | 0.0000001000000.0 | Synth_pep_325V.1231.1231.2.dta |
| GPSGXVSAQXLR 2830 567   | 1 | 713.8375 | 1425.661 | 2 | 56.3  | 6.70E-06 | GPSGVSVAQLFR  | Phospho (ST) | 0.0000001000000.0 | Synth_pep_325V.1232.1232.2.dta |
| GPSGXVSAQXLR 3230 647   | 1 | 737.8404 | 1473.666 | 2 | 73.32 | 2.00E-07 | GPSGFVSEAQLFR | Phospho (ST) | 0.0000001000000.0 | Synth_pep_325V.1233.1233.2.dta |
| GPSGXVSAQXLR 5230 1047  | 1 | 720.8475 | 1439.681 | 2 | 40.29 | 0.00028  | GPSGLVSEAQLFR | Phospho (ST) | 0.0000001000000.0 | Synth_pep_325V.1235.1235.2.dta |
| GPSGXVSAQXLR 3880 777   | 1 | 698.8535 | 1395.693 | 2 | 65.6  | 2.80E-07 | GPSGFVSYAQLVR | Phospho (ST) | 0.0000001000000.0 | Synth_pep_325V.1239.1239.2.dta |
| GPSGXVSAQXLR 5570 1115  | 1 | 689.859  | 1377.704 | 2 | 63.03 | 1.90E-06 | GPSGLVSLAQLTR | Phospho (ST) | 0.0000001000000.0 | Synth_pep_325V.1240.1240.2.dta |
| GPSGXVSAQXLR 3340 669   | 1 | 701.83   | 1401.645 | 2 | 41.17 | 0.00014  | GPSGFVFAQLGR  | Phospho (ST) | 0.0000001000000.0 | Synth_pep_325V.1241.1241.2.dta |
| GPSGXVSAQXLR 1350 1272  | 1 | 699.8384 | 1397.662 | 2 | 37.9  | 0.00088  | GPSGVSFAQLK   | Phospho (ST) | 0.0000001000000.0 | Synth_pep_325V.1247.1247.2.dta |
| GPSGXVSAQXLR 5300 1061  | 1 | 691.8452 | 1381.676 | 2 | 68.31 | 2.20E-07 | GPSGLVFAQLAR  | Phospho (ST) | 0.0000001000000.0 | Synth_pep_325V.1248.1248.2.dta |
| GPSGXVSAQXLR 9930 1987  | 1 | 762.8475 | 1523.68  | 2 | 61.77 | 4.50E-06 | GPSGVVSYAQLFR | Phospho (ST) | 0.0000001000000.0 | Synth_pep_325V.1249.1249.2.dta |
| GPSGXVSAQXLR 5370 1075  | 1 | 706.8484 | 1411.682 | 2 | 59.38 | 4.20E-06 | GPSGLVFAQLTR  | Phospho (ST) | 0.0000001000000.0 | Synth_pep_325V.1250.1250.2.dta |
| GPSGXVSAQXLR 8850 11772 | 1 | 667.8589 | 1333.703 | 2 | 44.68 | 0.00014  | GPSGVVSYAQLLK | Phospho (ST) | 0.0000001000000.0 | Synth_pep_325V.1255.1255.2.dta |
| GPSGXVSAQXLR 5500 11102 | 1 | 660.8508 | 1319.687 | 2 | 51.04 | 2.60E-05 | GPSGLVSLAQLAK | Phospho (ST) | 0.0000001000000.0 | Synth_pep_325V.1256.1256.2.dta |
| GPSGXVSAQXLR 4350 871   | 1 | 684.837  | 1367.659 | 2 | 58.77 | 6.80E-06 | GPSGVSFAQLK   | Phospho (ST) | 0.0000001000000.0 | Synth_pep_325V.1263.1263.2.dta |
| GPSGXVSAQXLR 2550 511   | 1 | 703.8558 | 1405.697 | 2 | 46.32 | 0.00017  | GPSGVSVAQLLR  | Phospho (ST) | 0.0000001000000.0 | Synth_pep_325V.1271.1271.2.dta |
| GPSGXVSAQXLR 1550 311   | 1 | 696.8481 | 1391.682 | 2 | 48.38 | 8.00E-05 | GPSGDVSLAQLLR | Phospho (ST) | 0.0000001000000.0 | Synth_pep_325V.1272.1272.2.dta |
| GPSGXVSAQXLR 0550 111   | 1 | 674.8533 | 1347.692 | 2 | 71.81 | 6.60E-08 | GPSGAVSLAQLR  | Phospho (ST) | 0.0000001000000.0 | Synth_pep_325V.1279.1279.2.dta |
| GPSGXVSAQXLR 6530 11308 | 1 | 685.8398 | 1369.665 | 2 | 46.02 | 0.00015  | GPSGVSVAQLFK  | Phospho (ST) | 0.0000001000000.0 | Synth_pep_325V.1280.1280.2.dta |
| GPSGXVSAQXLR 0300 607   | 1 | 708.8351 | 1415.656 | 2 | 43.96 | 0.00025  | GPSGFVSAQLFR  | Phospho (ST) | 0.0000001000000.0 | Synth_pep_325V.1281.1281.2.dta |
| GPSGXVSAQXLR 0830 1168  | 1 | 670.836  | 1339.657 | 2 | 30.47 | 0.0048   | GPSGAVSAQLFK  | Phospho (ST) | 0.0000001000000.0 | Synth_pep_325V.1284.1284.2.dta |
| GPSGXVSAQXLR 3590 1720  | 1 | 723.8552 | 1445.696 | 2 | 35.64 | 0.0016   | GPSGFVSLAQLYK | Phospho (ST) | 0.0000001000000.0 | Synth_pep_325V.1287.1287.2.dta |
| GPSGXVSAQXLR 9830 11968 | 1 | 716.8484 | 1431.682 | 2 | 42.64 | 0.00029  | GPSGVVSYAQLFK | Phospho (ST) | 0.0000001000000.0 | Synth_pep_325V.1288.1288.2.dta |
| GPSGXVSAQXLR 8850 10171 | 1 | 681.86   | 1361.706 | 2 | 62.11 | 6.20E-07 | GPSGVVSYAQLLR | Phospho (ST) | 0.0000001000000.0 | Synth_pep_325V.1289.1289.2.dta |
| GPSGXVSAQXLR 3050 1612  | 1 | 677.8427 | 1353.671 | 2 | 40.68 | 0.00032  | GPSGFVSAQLLK  | Phospho (ST) | 0.0000001000000.0 | Synth_pep_325V.1291.1291.2.dta |
| GPSGXVSAQXLR 3390 1680  | 1 | 740.8474 | 1479.68  | 2 | 45.79 | 0.00026  | GPSGFVFAQLYK  | Phospho (ST) | 0.0000001000000.0 | Synth_pep_325V.1295.1295.2.dta |
| GPSGXVSAQXLR 0580 1118  | 1 | 653.8423 | 1305.67  | 2 | 34.01 | 0.0017   | GPSGAVSLAQLVK | Phospho (ST) | 0.0000001000000.0 | Synth_pep_325V.1298.1298.2.dta |
| GPSGXVSAQXLR 3950 791   | 1 | 737.8583 | 1473.702 | 2 | 71.09 | 2.50E-07 | GPSGFVSYAQLLR | Phospho (ST) | 0.0000001000000.0 | Synth_pep_325V.1303.1303.2.dta |
| GPSGXVSAQXLR 1530 307   | 1 | 713.8396 | 1425.665 | 2 | 72.45 | 2.00E-07 | GPSGDVSLAQLFR | Phospho (ST) | 0.0000001000000.0 | Synth_pep_325V.1305.1305.2.dta |
| GPSGXVSAQXLR 9830 1967  | 1 | 730.8495 | 1459.684 | 2 | 53.6  | 1.80E-05 | GPSGVVSYAQLFR | Phospho (ST) | 0.0000001000000.0 | Synth_pep_325V.1306.1306.2.dta |
| GPSGXVSAQXLR 4330 1868  | 1 | 687.8267 | 1373.639 | 2 | 44.85 | 0.00029  | GPSGVSFAQLFK  | Phospho (ST) | 0.0000001000000.0 | Synth_pep_325V.1311.1311.2.dta |
| GPSGXVSAQXLR 8830 1767  | 1 | 698.8525 | 1395.69  | 2 | 77.41 | 1.80E-08 | GPSGVVSYAQLLR | Phospho (ST) | 0.0000001000000.0 | Synth_pep_325V.1319.1319.2.dta |
| GPSGXVSAQXLR 2530 1508  | 1 | 706.8436 | 1411.673 | 2 | 42.41 | 0.00025  | GPSGVSVAQLFK  | Phospho (ST) | 0.0000001000000.0 | Synth_pep_325V.1320.1320.2.dta |
| GPSGXVSAQXLR 7330 1468  | 1 | 709.8401 | 1417.666 | 2 | 31.67 | 0.0041   | GPSGVVFAQLFK  | Phospho (ST) | 0.0000001000000.0 | Synth_pep_325V.1322.1322.2.dta |
| GPSGXVSAQXLR 0330 168   | 1 | 694.8349 | 1387.655 | 2 | 45.72 | 0.00018  | GPSGAVFAQLFK  | Phospho (ST) | 0.0000001000000.0 | Synth_pep_325V.1323.1323.2.dta |
| GPSGXVSAQXLR 4330 867   | 1 | 701.8303 | 1401.646 | 2 | 72.58 | 9.90E-08 | GPSGVSFAQLFR  | Phospho (ST) | 0.0000001000000.0 | Synth_pep_325V.1327.1327.2.dta |
| GPSGXVSAQXLR 0550 1112  | 1 | 660.8516 | 1319.689 | 2 | 23.36 | 0.015    | GPSGAVSLAQLK  | Phospho (ST) | 0.0000001000000.0 | Synth_pep_325V.1331.1331.2.dta |
| GPSGXVSAQXLR 5880 1077  | 1 | 705.8614 | 1409.708 | 2 | 59.99 | 1.20E-06 | GPSGLVFAQLVR  | Phospho (ST) | 0.0000001000000.0 | Synth_pep_325V.1335.1335.2.dta |
| GPSGXVSAQXLR 5580 1117  | 1 | 688.8692 | 1375.724 | 2 | 65.16 | 6.90E-07 | GPSGLVSLAQLVR | Phospho (ST) | 0.0000001000000.0 | Synth_pep_325V.1336.1336.2.dta |
| GPSGXVSAQXLR 8730 1747  | 1 | 699.8391 | 1397.664 | 2 | 28.27 | 0.012    | GPSGVVSTAQLFR | Phospho (ST) | 0.0000001000000.0 | Synth_pep_325V.1337.1337.2.dta |
| GPSGXVSAQXLR 5350 1071  | 1 | 712.8696 | 1423.725 | 2 | 19.5  | 0.011    | GPSGLVFAQLLR  | Phospho (ST) | 0.0000001000000.0 | Synth_pep_325V.1344.1344.2.dta |
| GPSGXVSAQXLR 3930 787   | 1 | 754.8508 | 1507.687 | 2 | 57.72 | 6.80E-06 | GPSGFVSYAQLFR | Phospho (ST) | 0.0000001000000.0 | Synth_pep_325V.1352.1352.2.dta |
| GPSGXVSAQXLR 0330 67    | 1 | 708.8372 | 1415.66  | 2 | 57.8  | 8.80E-06 | GPSGAVFAQLFR  | Phospho (ST) | 0.0000001000000.0 | Synth_pep_325V.1353.1353.2.dta |
| GPSGXVSAQXLR 0530 1108  | 1 | 677.8427 | 1353.671 | 2 | 35.03 | 0.0012   | GPSGAVSLAQLFK | Phospho (ST) | 0.0000001000000.0 | Synth_pep_325V.1360.1360.2.dta |
| GPSGXVSAQXLR 5950 1191  | 1 | 720.8672 | 1439.72  | 2 | 37.01 | 0.00042  | GPSGLVSYAQLLR | Phospho (ST) | 0.0000001000000.0 | Synth_pep_325V.1379.1379.2.dta |
| GPSGXVSAQXLR 5930 1187  | 1 | 737.856  | 1473.697 | 2 | 45.7  | 0.00025  | GPSGLVSYAQLFR | Phospho (ST) | 0.0000001000000.0 | Synth_pep_325V.1384.1384.2.dta |
| GPSGXVSAQXLR 9330 1868  | 1 | 740.8463 | 1479.678 | 2 | 40.88 | 0.00077  | GPSGVVFAQLFK  | Phospho (ST) | 0.0000001000000.0 | Synth_pep_325V.1385.1385.2.dta |
| GPSGXVSAQXLR 5830 11168 | 1 | 691.8578 | 1381.701 | 2 | 40.97 | 0.00043  | GPSGLVSYAQLFK | Phospho (ST) | 0.0000001000000.0 | Synth_pep_325V.1391.1391.2.dta |
| GPSGXVSAQXLR 3830 767   | 1 | 722.8522 | 1443.69  | 2 | 53.92 | 1.60E-05 | GPSGFVSYAQLFR | Phospho (ST) | 0.0000001000000.0 | Synth_pep_325V.1407.1407.2.dta |
| GPSGXVSAQXLR 5830 1167  | 1 | 705.86   | 1409.705 | 2 | 67.71 | 1.70E-07 | GPSGLVSYAQLFR | Phospho (ST) | 0.0000001000000.0 | Synth_pep_325V.1408.1408.2.dta |
| GPSGXVSAQXLR 8550 1711  | 1 | 688.8676 | 1375.721 | 2 | 68.6  | 4.40E-07 | GPSGVVSLAQLLR | Phospho (ST) | 0.0000001000000.0 | Synth_pep_325V.1409.1409.2.dta |
| GPSGXVSAQXLR 5350 1072  | 1 | 698.8652 | 1395.716 | 2 | 54.58 | 1.00E-05 | GPSGLVFAQLLK  | Phospho (ST) | 0.0000001000000.0 | Synth_pep_325V.1424.1424.2.dta |
| GPSGXVSAQXLR 8330 1668  | 1 | 708.85   | 1415.686 | 2 | 44.66 | 0.00032  | GPSGVVFAQLFK  | Phospho (ST) | 0.0000001000000.0 | Synth_pep_325V.1426.1426.2.dta |
| GPSGXVSAQXLR 5550 1112  | 1 | 681.8728 | 1361.731 | 2 | 49.26 | 2.70E-05 | GPSGLVSLAQLLK | Phospho (ST) | 0.0000001000000.0 | Synth_pep_325V.1431.1431.2.dta |
| GPSGXVSAQXLR 3350 1672  | 1 | 715.8573 | 1429.7   | 2 | 39.94 | 0.00058  | GPSGFVFAQLLK  | Phospho (ST) | 0.0000001000000.0 | Synth_pep_325V.1432.1432.2.dta |
| GPSGXVSAQXLR 5880 1118  | 1 | 674.8677 | 1347.721 | 2 | 34.79 | 0.001    | GPSGLVSLAQLVK | Phospho (ST) | 0.0000001000000.0 | Synth_pep_325V.1437.1437.2.dta |
| GPSGXVSAQXLR 5550 1111  | 1 | 695.876  | 1389.738 | 2 | 72.92 | 6.90E-08 | GPSGLVSLAQLLR | Phospho (ST) | 0.0000001000000.0 | Synth_pep_325V.1447.1447.2.dta |
| GPSGXVSAQXLR 3350 671   | 1 | 729.86   | 1457.706 | 2 | 61.93 | 1.50E-06 | GPSGFVFA      |              |                   |                                |

|                           |   |          |          |   |       |          |               |              |                  |                              |
|---------------------------|---|----------|----------|---|-------|----------|---------------|--------------|------------------|------------------------------|
| GPSGVSAQXLR 0 6 2 0 125   | 1 | 669.8049 | 1337.595 | 2 | 41.58 | 0.00032  | GPSGAVSAQLER  | Phospho (ST) | 0.000001000000.0 | Synth_pep_325V.744.744.2.dta |
| GPSGVSAQXLR 0 4 7 0 95    | 1 | 640.8035 | 1279.592 | 2 | 35.53 | 0.0014   | GPSGAVSAQLTR  | Phospho (ST) | 0.000001000000.0 | Synth_pep_325V.745.745.2.dta |
| GPSGVSAQXLR 1 1 2 0 225   | 1 | 705.7979 | 1409.581 | 2 | 52.62 | 1.60E-05 | GPSGVDSDAQLER | Phospho (ST) | 0.000001000000.0 | Synth_pep_325V.746.746.2.dta |
| GPSGVSAQXLR 2 4 1 0 483   | 1 | 676.7957 | 1351.577 | 2 | 61.21 | 3.00E-06 | GPSGVEGAQLDR  | Phospho (ST) | 0.000001000000.0 | Synth_pep_325V.751.751.2.dta |
| GPSGVSAQXLR 2 1 2 0 425   | 1 | 712.8062 | 1423.598 | 2 | 54.36 | 1.90E-05 | GPSGVEQAQLER  | Phospho (ST) | 0.000001000000.0 | Synth_pep_325V.752.752.2.dta |
| GPSGVSAQXLR 0 4 1 0 83    | 1 | 647.7917 | 1293.569 | 2 | 59.99 | 9.50E-06 | GPSGAVSAQLDR  | Phospho (ST) | 0.000001000000.0 | Synth_pep_325V.767.767.2.dta |
| GPSGVSAQXLR 2 2 2 0 445   | 1 | 719.8133 | 1437.612 | 2 | 72.78 | 2.40E-07 | GPSGVEQAQLER  | Phospho (ST) | 0.000001000000.0 | Synth_pep_325V.769.769.2.dta |
| GPSGVSAQXLR 0 2 4 0 49    | 1 | 654.8007 | 1307.587 | 2 | 55.71 | 1.50E-05 | GPSGAVSAQLGR  | Phospho (ST) | 0.000001000000.0 | Synth_pep_325V.775.775.2.dta |
| GPSGVSAQXLR 0 0 4 0 9     | 1 | 625.798  | 1249.581 | 2 | 51.44 | 3.60E-05 | GPSGAVSAQLGR  | Phospho (ST) | 0.000001000000.0 | Synth_pep_325V.776.776.2.dta |
| GPSGVSAQXLR 0 0 0 1 2     | 1 | 618.8032 | 1235.592 | 2 | 43.14 | 4.90E-05 | GPSGAVSAQLAK  | Phospho (ST) | 0.000001000000.0 | Synth_pep_325V.777.777.2.dta |
| GPSGVSAQXLR 1 0 2 0 205   | 1 | 683.8029 | 1365.591 | 2 | 46.47 | 0.00013  | GPSGVDVSAQLER | Phospho (ST) | 0.000001000000.0 | Synth_pep_325V.778.778.2.dta |
| GPSGVSAQXLR 6 4 9 1 1300  | 1 | 665.8053 | 1329.596 | 2 | 56.9  | 1.40E-05 | GPSGVSQAQLYK  | Phospho (ST) | 0.000001000000.0 | Synth_pep_325V.783.783.2.dta |
| GPSGVSAQXLR 9 1 6 1 1834  | 1 | 694.8083 | 1387.602 | 2 | 35.4  | 0.0017   | GPSGVDSDAQLSK | Phospho (ST) | 0.000001000000.0 | Synth_pep_325V.791.791.2.dta |
| GPSGVSAQXLR 9 4 4 1 1890  | 1 | 650.8007 | 1299.587 | 2 | 31.78 | 0.0048   | GPSGVSQAQLGK  | Phospho (ST) | 0.000001000000.0 | Synth_pep_325V.792.792.2.dta |
| GPSGVSAQXLR 0 0 0 0 11    | 1 | 632.8063 | 1263.598 | 2 | 65.06 | 2.50E-06 | GPSGAVSAQLAR  | Phospho (ST) | 0.000001000000.0 | Synth_pep_325V.793.793.2.dta |
| GPSGVSAQXLR 2 0 2 0 405   | 1 | 690.8114 | 1379.608 | 2 | 37.67 | 0.00079  | GPSGVEQAQLER  | Phospho (ST) | 0.000001000000.0 | Synth_pep_325V.794.794.2.dta |
| GPSGVSAQXLR 1 4 9 1 300   | 1 | 679.8038 | 1357.593 | 2 | 36.62 | 0.00099  | GPSGVDVSAQLYK | Phospho (ST) | 0.000001000000.0 | Synth_pep_325V.795.795.2.dta |
| GPSGVSAQXLR 0 6 9 1 140   | 1 | 672.8148 | 1343.615 | 2 | 46.45 | 0.0003   | GPSGAVSAQLYK  | Phospho (ST) | 0.000001000000.0 | Synth_pep_325V.796.796.2.dta |
| GPSGVSAQXLR 2 6 9 1 540   | 1 | 701.8161 | 1401.618 | 2 | 41.6  | 0.00064  | GPSGVEVSAQLYK | Phospho (ST) | 0.000001000000.0 | Synth_pep_325V.797.797.2.dta |
| GPSGVSAQXLR 2 4 9 1 500   | 1 | 686.8107 | 1371.607 | 2 | 52.98 | 3.50E-05 | GPSGVEQAQLYK  | Phospho (ST) | 0.000001000000.0 | Synth_pep_325V.799.799.2.dta |
| GPSGVSAQXLR 0 0 4 1 10    | 1 | 611.7957 | 1221.577 | 2 | 32.17 | 0.00061  | GPSGAVSAQLGK  | Phospho (ST) | 0.000001000000.0 | Synth_pep_325V.800.800.2.dta |
| GPSGVSAQXLR 4 0 4 1 810   | 1 | 604.788  | 1207.562 | 2 | 27.57 | 0.0017   | GPSGVDVSAQLGK | Phospho (ST) | 0.000001000000.0 | Synth_pep_325V.802.802.2.dta |
| GPSGVSAQXLR 0 4 8 0 97    | 1 | 639.8137 | 1277.613 | 2 | 53.88 | 4.60E-05 | GPSGAVSAQLVR  | Phospho (ST) | 0.000001000000.0 | Synth_pep_325V.807.807.2.dta |
| GPSGVSAQXLR 1 9 1 1 384   | 1 | 708.8071 | 1415.6   | 2 | 42.82 | 7.10E-07 | GPSGVDVSAQLDK | Phospho (ST) | 0.000001000000.0 | Synth_pep_325V.808.808.2.dta |
| GPSGVSAQXLR 9 4 4 0 1889  | 1 | 664.8033 | 1327.592 | 2 | 68.15 | 6.20E-07 | GPSGVDVSAQLGR | Phospho (ST) | 0.000001000000.0 | Synth_pep_325V.809.809.2.dta |
| GPSGVSAQXLR 2 1 9 1 440   | 1 | 715.813  | 1429.612 | 2 | 41.88 | 0.00029  | GPSGVEQAQLYK  | Phospho (ST) | 0.000001000000.0 | Synth_pep_325V.810.810.2.dta |
| GPSGVSAQXLR 4 1 8 0 837   | 1 | 661.8087 | 1321.603 | 2 | 40.46 | 0.00025  | GPSGVDSDAQLVR | Phospho (ST) | 0.000001000000.0 | Synth_pep_325V.811.811.2.dta |
| GPSGVSAQXLR 0 4 9 1 100   | 1 | 657.8081 | 1313.602 | 2 | 35.59 | 0.0018   | GPSGAVSAQLYK  | Phospho (ST) | 0.000001000000.0 | Synth_pep_325V.812.812.2.dta |
| GPSGVSAQXLR 8 7 1 1 1744  | 1 | 669.8201 | 1337.626 | 2 | 43.15 | 0.00019  | GPSGVVSTAQLDK | Phospho (ST) | 0.000001000000.0 | Synth_pep_325V.815.815.2.dta |
| GPSGVSAQXLR 6 8 6 1 1374  | 1 | 648.8135 | 1295.613 | 2 | 40.44 | 0.00035  | GPSGVSQAQLSK  | Phospho (ST) | 0.000001000000.0 | Synth_pep_325V.816.816.2.dta |
| GPSGVSAQXLR 2 1 8 0 437   | 1 | 697.8192 | 1393.624 | 2 | 60.19 | 4.50E-06 | GPSGVEQAQLVR  | Phospho (ST) | 0.000001000000.0 | Synth_pep_325V.817.817.2.dta |
| GPSGVSAQXLR 6 8 4 1 1370  | 1 | 633.8082 | 1265.602 | 2 | 29.47 | 0.0015   | GPSGVSQAQLGK  | Phospho (ST) | 0.000001000000.0 | Synth_pep_325V.823.823.2.dta |
| GPSGVSAQXLR 2 1 9 0 439   | 1 | 729.8156 | 1457.617 | 2 | 70.85 | 3.60E-07 | GPSGVEQAQLYK  | Phospho (ST) | 0.000001000000.0 | Synth_pep_325V.824.824.2.dta |
| GPSGVSAQXLR 1 1 9 0 239   | 1 | 722.8077 | 1443.601 | 2 | 68.7  | 4.80E-07 | GPSGVDVSAQLYR | Phospho (ST) | 0.000001000000.0 | Synth_pep_325V.825.825.2.dta |
| GPSGVSAQXLR 6 8 1 1 1364  | 1 | 662.8119 | 1323.609 | 2 | 40.69 | 0.00026  | GPSGVSVAQLDK  | Phospho (ST) | 0.000001000000.0 | Synth_pep_325V.831.831.2.dta |
| GPSGVSAQXLR 8 0 6 1 1614  | 1 | 640.8163 | 1279.618 | 2 | 38.87 | 0.00047  | GPSGVSQAQLSK  | Phospho (ST) | 0.000001000000.0 | Synth_pep_325V.832.832.2.dta |
| GPSGVSAQXLR 8 1 0 0 1621  | 1 | 668.8164 | 1335.618 | 2 | 66.59 | 8.20E-07 | GPSGVDVSAQLAR | Phospho (ST) | 0.000001000000.0 | Synth_pep_325V.833.833.2.dta |
| GPSGVSAQXLR 2 0 2 1 406   | 1 | 676.8062 | 1351.598 | 2 | 38.67 | 0.00067  | GPSGVEQAQLSK  | Phospho (ST) | 0.000001000000.0 | Synth_pep_325V.834.834.2.dta |
| GPSGVSAQXLR 0 2 9 1 60    | 1 | 693.8201 | 1385.626 | 2 | 31.86 | 0.0041   | GPSGAVSAQLYK  | Phospho (ST) | 0.000001000000.0 | Synth_pep_325V.839.839.2.dta |
| GPSGVSAQXLR 6 8 4 0 1369  | 1 | 647.8083 | 1293.602 | 2 | 43.43 | 0.00045  | GPSGVSVAQLGR  | Phospho (ST) | 0.000001000000.0 | Synth_pep_325V.847.847.2.dta |
| GPSGVSAQXLR 2 2 8 0 457   | 1 | 704.8268 | 1407.639 | 2 | 56.93 | 1.30E-05 | GPSGVEQAQLYR  | Phospho (ST) | 0.000001000000.0 | Synth_pep_325V.848.848.2.dta |
| GPSGVSAQXLR 2 2 9 0 459   | 1 | 736.8239 | 1471.633 | 2 | 76.38 | 9.90E-08 | GPSGVEQAQLYR  | Phospho (ST) | 0.000001000000.0 | Synth_pep_325V.849.849.2.dta |
| GPSGVSAQXLR 1 0 8 1 218   | 1 | 654.8153 | 1307.616 | 2 | 40.31 | 0.00049  | GPSGVDVSAQLVK | Phospho (ST) | 0.000001000000.0 | Synth_pep_325V.855.855.2.dta |
| GPSGVSAQXLR 0 8 4 1 170   | 1 | 625.8109 | 1249.607 | 2 | 40.19 | 0.00013  | GPSGAVSAQLGK  | Phospho (ST) | 0.000001000000.0 | Synth_pep_325V.856.856.2.dta |
| GPSGVSAQXLR 0 1 9 0 39    | 1 | 700.8135 | 1399.612 | 2 | 39.34 | 0.00069  | GPSGAVSAQLYK  | Phospho (ST) | 0.000001000000.0 | Synth_pep_325V.857.857.2.dta |
| GPSGVSAQXLR 2 8 6 0 573   | 1 | 683.8215 | 1365.628 | 2 | 45.05 | 0.00014  | GPSGVEQAQLYR  | Phospho (ST) | 0.000001000000.0 | Synth_pep_325V.858.858.2.dta |
| GPSGVSAQXLR 4 8 1 1 898   | 1 | 618.8033 | 1235.592 | 2 | 18.86 | 0.013    | GPSGVSQAQLVK  | Phospho (ST) | 0.000001000000.0 | Synth_pep_325V.861.861.2.dta |
| GPSGVSAQXLR 0 2 9 0 59    | 1 | 707.8216 | 1413.629 | 2 | 44.93 | 0.00021  | GPSGAVSAQLYR  | Phospho (ST) | 0.000001000000.0 | Synth_pep_325V.863.863.2.dta |
| GPSGVSAQXLR 8 2 0 0 1641  | 1 | 675.8245 | 1349.634 | 2 | 58.99 | 5.00E-06 | GPSGVVSAQLAR  | Phospho (ST) | 0.000001000000.0 | Synth_pep_325V.864.864.2.dta |
| GPSGVSAQXLR 0 0 8 1 18    | 1 | 632.8187 | 1263.623 | 2 | 43.66 | 0.00011  | GPSGAVSAQLVK  | Phospho (ST) | 0.000001000000.0 | Synth_pep_325V.871.871.2.dta |
| GPSGVSAQXLR 0 4 9 0 99    | 1 | 671.8113 | 1341.608 | 2 | 43.09 | 0.0001   | GPSGAVSAQLYR  | Phospho (ST) | 0.000001000000.0 | Synth_pep_325V.872.872.2.dta |
| GPSGVSAQXLR 9 0 7 1 1816  | 1 | 679.8234 | 1357.632 | 2 | 37.35 | 0.003    | GPSGVVSAQLTK  | Phospho (ST) | 0.000001000000.0 | Synth_pep_325V.873.873.2.dta |
| GPSGVSAQXLR 2 7 8 0 557   | 1 | 690.8239 | 1379.645 | 2 | 42.6  | 0.00026  | GPSGVEVSAQLYR | Phospho (ST) | 0.000001000000.0 | Synth_pep_325V.874.874.2.dta |
| GPSGVSAQXLR 9 4 2 1 1886  | 1 | 686.8112 | 1371.608 | 2 | 39.87 | 0.00071  | GPSGVSQAQLYK  | Phospho (ST) | 0.000001000000.0 | Synth_pep_325V.879.879.2.dta |
| GPSGVSAQXLR 0 0 9 0 99    | 1 | 678.8193 | 1355.624 | 2 | 46.17 | 5.40E-05 | GPSGAVSAQLYR  | Phospho (ST) | 0.000001000000.0 | Synth_pep_325V.887.887.2.dta |
| GPSGVSAQXLR 8 0 2 1 1606  | 1 | 661.824  | 1321.634 | 2 | 56.7  | 1.90E-05 | GPSGVVSAQLYK  | Phospho (ST) | 0.000001000000.0 | Synth_pep_325V.888.888.2.dta |
| GPSGVSAQXLR 0 9 0 1 182   | 1 | 664.8166 | 1327.619 | 2 | 37.29 | 0.00092  | GPSGAVSAQLAK  | Phospho (ST) | 0.000001000000.0 | Synth_pep_325V.889.889.2.dta |
| GPSGVSAQXLR 1 9 7 0 395   | 1 | 715.8185 | 1429.622 | 2 | 45.25 | 0.00021  | GPSGVDVSAQLTR | Phospho (ST) | 0.000001000000.0 | Synth_pep_325V.890.890.2.dta |
| GPSGVSAQXLR 3 4 6 1 694   | 1 | 657.8085 | 1313.602 | 2 | 33.88 | 0.0027   | GPSGVSQAQLSK  | Phospho (ST) | 0.000001000000.0 | Synth_pep_325V.891.891.2.dta |
| GPSGVSAQXLR 4 8 0 0 961   | 1 | 639.8142 | 1277.614 | 2 | 51.58 | 7.70E-05 | GPSGVSVAQLAR  | Phospho (ST) | 0.000001000000.0 | Synth_pep_325V.895.895.2.dta |
| GPSGVSAQXLR 3 4 4 1 690   | 1 | 642.8036 | 1283.593 | 2 | 49.57 | 3.80E-05 | GPSGVSQAQLGK  | Phospho (ST) | 0.000001000000.0 | Synth_pep_325V.897.897.2.dta |
| GPSGVSAQXLR 1 8 2 0 365   | 1 | 697.8184 | 1393.622 | 2 | 46.92 | 9.70E-05 | GPSGVDVSAQLER | Phospho (ST) | 0.000001000000.0 | Synth_pep_325V.899.899.2.dta |
| GPSGVSAQXLR 3 4 0 1 682   | 1 | 649.8108 | 1297.607 | 2 | 53.04 | 3.30E-05 | GPSGVSQAQLAK  | Phospho (ST) | 0.000001000000.0 | Synth_pep_325V.903.903.2.dta |
| GPSGVSAQXLR 2 9 7 0 595   | 1 | 722.8266 | 1443.629 | 2 | 56.06 | 1.60E-05 | GPSGVEVSAQLTR | Phospho (ST) | 0.000001000000.0 | Synth_pep_325V.904.904.2.dta |
| GPSGVSAQXLR 0 8 0 0 161   | 1 | 646.8216 | 1291.629 | 2 | 52.58 | 1.10E-05 | GPSGAVSAQLAR  | Phospho (ST) | 0.000001000000.0 | Synth_pep_325V.911.911.2.dta |
| GPSGVSAQXLR 1 4 5 0 291   | 1 | 668.8162 | 1335.618 | 2 | 84.99 | 1.20E-08 | GPSGVDVSAQLLR | Phospho (ST) | 0.000001000000.0 | Synth_pep_325V.912.912.2.dta |
| GPSGVSAQXLR 0 9 2 1 186   | 1 | 693.8204 | 1385.626 | 2 | 25.71 | 0.017    | GPSGAVSAQLYK  | Phospho (ST) | 0.000001000000.0 | Synth_pep_325V.913.913.2.dta |
| GPSGVSAQXLR 2 8 2 0 565   | 1 | 704.8269 | 1407.639 | 2 | 53.97 | 2.50E-05 | GPSGVEVSAQLER | Phospho (ST) | 0.000001000000.0 | Synth_pep_325V.920.920.2.dta |
| GPSGVSAQXLR 5 0 6 1 1014  | 1 | 647.8243 | 1293.634 | 2 | 37.13 | 0.00093  | GPSGLVSAQLSK  | Phospho (ST) | 0.000001000000.0 | Synth_pep_325V.927.927.2.dta |
| GPSGVSAQXLR 6 5 4 1 1310  | 1 | 640.8165 | 1279.618 | 2 | 43.64 | 0.00016  | GPSGVSQAQLGK  | Phospho (ST) | 0.000001000000.0 | Synth_pep_325V.929.929.2.dta |
| GPSGVSAQXLR 3 1 6 0 633   | 1 | 700.8127 | 1399.611 | 2 | 67.43 | 1.10E-06 | GPSGVSQAQLSK  | Phospho (ST) | 0.000001000000.0 | Synth_pep_325V.929.929.2.dta |
| GPSGVSAQXLR 9 2 9 1 1860  | 1 | 739.8314 | 1477.648 | 2 | 44.81 | 0.00013  | GPSGVEVSAQLYK | Phospho (ST) | 0.000001000000.0 | Synth_pep_325V.930.930.2.dta |
| GPSGVSAQXLR 1 8 7 0 375   | 1 | 683.8185 | 1365.623 | 2 | 31.39 | 0.0045   | GPSGVDVSAQLTR | Phospho (ST) | 0.000001000000.0 | Synth_pep_325V.931.931.2.dta |
| SXPFKXSPLEFR 6 0 0 1 1202 | 1 | 472.9022 | 1415.685 | 3 | 72.03 | 2.10E-07 | SXPFKXSPLEFR  | Phospho (ST) | 0.000001000000.0 | Synth_pep_325V.933.933.3.dta |
| GPSGVSAQXLR 5 1 0 0 1021  | 1 | 675.8229 | 1349.631 | 2 | 52.28 | 5.90E-05 | GPSGVDVSAQLAR | Phospho (ST) | 0.000001000000.0 | Synth_pep_325V.935.935.2.dta |
| GPSGVSAQXLR 9 7 8 0 1957  | 1 | 707.8375 | 1413.66  | 2 | 42.52 | 0.00034  | GPSGVVSTAQLYR | Phospho (ST) | 0.000001000000.0 | Synth_pep_325V.936.936.2.dta |
| GPSGVSAQXLR 4 0 8 1 818   | 1 | 625.8108 | 1249.607 | 2 | 40.37 | 0.00012  | GPSGVSQAQLVK  | Phospho (ST) | 0.000001000000.0 | Synth_pep_325V.939.939.2.dta |
| GPSGVSAQXLR 8 8 6 1 1774  | 1 | 654.8333 | 1307.652 | 2 | 38.27 | 0.00063  | GPSGVSQAQLSK  | Phospho (ST) | 0.000001000000.0 | Synth_pep_325V.943.943.2.dta |
| GPSGVSAQXLR 7 9 9 1 1600  | 1 | 725.834  | 1449.654 | 2 | 34.83 | 0.0049   | GPSGVSQAQLYK  | Phospho (ST) | 0.000001000000.0 | Synth_pep_325V.945.945.2.dta |
| SXPFKXSPLEFR 7 1 2 0 1425 | 1 | 780      |          |   |       |          |               |              |                  |                              |

|                           |   |          |          |   |       |          |                |              |                   |                               |
|---------------------------|---|----------|----------|---|-------|----------|----------------|--------------|-------------------|-------------------------------|
| GPSGXVSAQXLR 09 8 0 197   | 1 | 692.8354 | 1383.656 | 2 | 57.67 | 4.60E-06 | GPSGAVSYAQLVR  | Phospho (ST) | 0.0000001000000.0 | Synth_pep_325V.999.999.2.dta  |
| SXPFKXSLXFR 8 0 9 1 1620  | 1 | 507.5901 | 1519.748 | 3 | 62.25 | 3.10E-06 | SVPFKASPLVFGK  | Phospho (ST) | 0.0000001000000.0 | Synth_pep_35V.1003.1003.3.dta |
| GPSGXVSAQXLR 8 8 0 0 1761 | 1 | 660.8374 | 1319.66  | 2 | 84.75 | 5.50E-09 | GPSGVVSYAQLAR  | Phospho (ST) | 0.0000001000000.0 | Synth_pep_35V.1008.1008.2.dta |
| GPSGXVSAQXLR 1 8 8 1 1378 | 1 | 668.8308 | 1335.647 | 2 | 36.47 | 0.0013   | GPSGDVSYAQLVK  | Phospho (ST) | 0.0000001000000.0 | Synth_pep_35V.1009.1009.2.dta |
| GPSGXVSAQXLR 2 2 3 0 447  | 1 | 728.8264 | 1455.638 | 2 | 68.66 | 5.60E-07 | GPSGEVSEALFR   | Phospho (ST) | 0.0000001000000.0 | Synth_pep_35V.1012.1012.2.dta |
| GPSGXVSAQXLR 1 2 3 0 247  | 1 | 721.8173 | 1441.62  | 2 | 46.36 | 5.10E-05 | GPSGDVSEALFR   | Phospho (ST) | 0.0000001000000.0 | Synth_pep_35V.1020.1020.2.dta |
| SXPFKXSLXFR 6 8 0 1 1362  | 1 | 482.2461 | 1443.717 | 3 | 67.25 | 1.20E-06 | SPPFKVSPFLAFGK | Phospho (ST) | 0.0000001000000.0 | Synth_pep_35V.1024.1024.3.dta |
| SXPFKXSLXFR 2 9 0 1 582   | 1 | 517.5812 | 1459.722 | 3 | 30.41 | 0.00057  | SPPFKVSPFLAFGK | Phospho (ST) | 0.0000001000000.0 | Synth_pep_35V.1029.1029.3.dta |
| SXPFKXSLXFR 6 5 0 1 1302  | 1 | 486.9178 | 1457.732 | 3 | 23.71 | 0.022    | SPPFKVSPFLAFGK | Phospho (ST) | 0.0000001000000.0 | Synth_pep_35V.1037.1037.3.dta |
| GPSGXVSAQXLR 0 3 0 0 61   | 1 | 670.822  | 1339.629 | 2 | 53.51 | 1.40E-05 | GPSGAVSFAQLAR  | Phospho (ST) | 0.0000001000000.0 | Synth_pep_35V.1040.1040.2.dta |
| GPSGXVSAQXLR 8 9 9 1 1800 | 1 | 724.8449 | 1447.675 | 2 | 42.58 | 0.0006   | GPSGVVSYAQLYK  | Phospho (ST) | 0.0000001000000.0 | Synth_pep_35V.1041.1041.2.dta |
| SXPFKXSLXFR 5 0 0 1 1002  | 1 | 481.5867 | 1441.738 | 3 | 64.79 | 1.10E-06 | SPPFKASPLAFGK  | Phospho (ST) | 0.0000001000000.0 | Synth_pep_35V.1043.1043.3.dta |
| GPSGXVSAQXLR 2 0 3 1 408  | 1 | 685.8221 | 1369.63  | 2 | 43.03 | 0.00033  | GPSGEVSAALFK   | Phospho (ST) | 0.0000001000000.0 | Synth_pep_35V.1044.1044.2.dta |
| SXPFKXSLXFR 0 9 9 1 200   | 1 | 528.9216 | 1583.743 | 3 | 37.47 | 0.00078  | SAPFKVSPFLYFGK | Phospho (ST) | 0.0000001000000.0 | Synth_pep_35V.1045.1045.3.dta |
| SXPFKXSLXFR 4 9 9 1 1000  | 1 | 524.2493 | 1569.726 | 3 | 70.85 | 4.30E-07 | SPPFKVSPFLYFGK | Phospho (ST) | 0.0000001000000.0 | Synth_pep_35V.1048.1048.3.dta |
| SXPFKXSLXFR 7 9 9 1 1600  | 1 | 538.9246 | 1613.752 | 3 | 38.06 | 0.00016  | SPPFKVSPFLYFGK | Phospho (ST) | 0.0000001000000.0 | Synth_pep_35V.1049.1049.3.dta |
| SXPFKXSLXFR 6 9 9 1 1400  | 1 | 534.2528 | 1599.737 | 3 | 58.48 | 3.60E-06 | SPPFKVSPFLYFGK | Phospho (ST) | 0.0000001000000.0 | Synth_pep_35V.1051.1051.3.dta |
| SXPFKXSLXFR 5 0 2 1 1006  | 1 | 500.9219 | 1499.744 | 3 | 55.15 | 1.70E-05 | SPPFKASPLFEGK  | Phospho (ST) | 0.0000001000000.0 | Synth_pep_35V.1053.1053.3.dta |
| GPSGXVSAQXLR 0 5 0 0 101  | 1 | 653.8291 | 1305.644 | 2 | 54.32 | 3.70E-06 | GPSGAVSLAQLAR  | Phospho (ST) | 0.0000001000000.0 | Synth_pep_35V.1059.1059.2.dta |
| SXPFKXSLXFR 2 9 9 1 600   | 1 | 548.2567 | 1641.748 | 3 | 22.69 | 0.00054  | SPPFKVSPFLYFGK | Phospho (ST) | 0.0000001000000.0 | Synth_pep_35V.1062.1062.3.dta |
| SXPFKXSLXFR 6 0 3 1 1208  | 1 | 498.2462 | 1491.717 | 3 | 49.6  | 7.20E-05 | SPPFKASPLFFGK  | Phospho (ST) | 0.0000001000000.0 | Synth_pep_35V.1065.1065.3.dta |
| GPSGXVSAQXLR 6 9 5 0 1391 | 1 | 707.8384 | 1413.662 | 2 | 67.47 | 7.80E-07 | GPSGSVSYAQLLR  | Phospho (ST) | 0.0000001000000.0 | Synth_pep_35V.1072.1072.2.dta |
| SXPFKXSLXFR 6 8 9 1 1380  | 1 | 512.9214 | 1535.743 | 3 | 69.73 | 4.20E-07 | SPPFKVSPFLYFGK | Phospho (ST) | 0.0000001000000.0 | Synth_pep_35V.1073.1073.3.dta |
| GPSGXVSAQXLR 3 9 7 1 796  | 1 | 717.8365 | 1433.658 | 2 | 45.25 | 0.00033  | GPSGVVSYAQLTK  | Phospho (ST) | 0.0000001000000.0 | Synth_pep_35V.1074.1074.2.dta |
| SXPFKXSLXFR 0 8 9 1 180   | 1 | 507.5891 | 1519.746 | 3 | 41.76 | 0.00037  | SAPFKVSPFLYFGK | Phospho (ST) | 0.0000001000000.0 | Synth_pep_35V.1075.1075.3.dta |
| GPSGXVSAQXLR 9 9 8 0 1997 | 1 | 738.8472 | 1475.68  | 2 | 51.61 | 2.90E-05 | GPSGVVSYAQLVR  | Phospho (ST) | 0.0000001000000.0 | Synth_pep_35V.1077.1077.2.dta |
| GPSGXVSAQXLR 5 8 7 1 1176 | 1 | 668.8477 | 1335.681 | 2 | 50.88 | 5.00E-05 | GPSGLVSAQLTK   | Phospho (ST) | 0.0000001000000.0 | Synth_pep_35V.1081.1081.2.dta |
| SXPFKXSLXFR 8 9 9 1 1800  | 1 | 538.2653 | 1611.774 | 3 | 43.58 | 5.30E-05 | SVPFKVSPFLYFGK | Phospho (ST) | 0.0000001000000.0 | Synth_pep_35V.1083.1083.3.dta |
| GPSGXVSAQXLR 3 9 0 0 781  | 1 | 716.835  | 1431.656 | 2 | 57.74 | 8.80E-06 | GPSGFVSYAQLAR  | Phospho (ST) | 0.0000001000000.0 | Synth_pep_35V.1096.1096.2.dta |
| GPSGXVSAQXLR 2 9 5 0 591  | 1 | 728.846  | 1455.678 | 2 | 41.04 | 0.00025  | GPSGEVSYAQLLR  | Phospho (ST) | 0.0000001000000.0 | Synth_pep_35V.1100.1100.2.dta |
| SXPFKXSLXFR 4 6 3 0 927   | 1 | 753.8591 | 1505.704 | 2 | 29.33 | 0.00037  | SPPFKVSPFLFFGK | Phospho (ST) | 0.0000001000000.0 | Synth_pep_35V.1109.1109.2.dta |
| GPSGXVSAQXLR 1 5 8 0 317  | 1 | 689.8401 | 1377.666 | 2 | 63.59 | 1.50E-06 | GPSGDVSLAQLVR  | Phospho (ST) | 0.0000001000000.0 | Synth_pep_35V.1112.1112.2.dta |
| SXPFKXSLXFR 1 8 9 1 380   | 1 | 522.2531 | 1563.737 | 3 | 33.89 | 0.00015  | SPPFKVSPFLYFGK | Phospho (ST) | 0.0000001000000.0 | Synth_pep_35V.1122.1122.3.dta |
| GPSGXVSAQXLR 7 5 8 0 1517 | 1 | 682.8483 | 1363.682 | 2 | 26.71 | 0.011    | GPSGTVSLAQLVR  | Phospho (ST) | 0.0000001000000.0 | Synth_pep_35V.1129.1129.2.dta |
| SXPFKXSLXFR 5 4 3 1 1088  | 1 | 502.2587 | 1503.754 | 3 | 21.99 | 0.013    | SPPFKVSPFLFFGK | Phospho (ST) | 0.0000001000000.0 | Synth_pep_35V.1133.1133.3.dta |
| GPSGXVSAQXLR 3 9 9 1 800  | 1 | 748.8446 | 1495.675 | 2 | 40.73 | 0.0007   | GPSGFVSYAQLYK  | Phospho (ST) | 0.0000001000000.0 | Synth_pep_35V.1136.1136.2.dta |
| GPSGXVSAQXLR 0 3 8 0 77   | 1 | 684.8374 | 1367.66  | 2 | 39.5  | 0.00047  | GPSGAVSFAQLVR  | Phospho (ST) | 0.0000001000000.0 | Synth_pep_35V.1144.1144.2.dta |
| SXPFKXSLXFR 6 5 9 1 1320  | 1 | 517.5934 | 1549.758 | 3 | 62.37 | 2.40E-06 | SPPFKVSPFLYFGK | Phospho (ST) | 0.0000001000000.0 | Synth_pep_35V.1145.1145.3.dta |
| GPSGXVSAQXLR 0 9 3 0 187  | 1 | 716.835  | 1431.655 | 2 | 63.17 | 2.50E-06 | GPSGAVSYAQLFR  | Phospho (ST) | 0.0000001000000.0 | Synth_pep_35V.1161.1161.2.dta |
| GPSGXVSAQXLR 8 9 8 0 1797 | 1 | 706.8492 | 1411.684 | 2 | 26.31 | 0.00084  | GPSGVVSYAQLVR  | Phospho (ST) | 0.0000001000000.0 | Synth_pep_35V.1165.1165.2.dta |
| SXPFKXSLXFR 5 0 3 1 1008  | 1 | 506.9303 | 1517.769 | 3 | 49.38 | 1.90E-05 | SPPFKASPLFFGK  | Phospho (ST) | 0.0000001000000.0 | Synth_pep_35V.1168.1168.3.dta |
| SXPFKXSLXFR 5 8 9 1 1180  | 1 | 521.6055 | 1561.795 | 3 | 49.77 | 2.10E-05 | SPPFKVSPFLYFGK | Phospho (ST) | 0.0000001000000.0 | Synth_pep_35V.1176.1176.3.dta |
| GPSGXVSAQXLR 5 9 8 0 1197 | 1 | 713.8586 | 1425.703 | 2 | 49.41 | 2.40E-05 | GPSGLVSYAQLVR  | Phospho (ST) | 0.0000001000000.0 | Synth_pep_35V.1184.1184.2.dta |
| GPSGXVSAQXLR 1 9 3 1 388  | 1 | 724.8273 | 1447.64  | 2 | 43.18 | 0.00029  | GPSGDVSYAQLFK  | Phospho (ST) | 0.0000001000000.0 | Synth_pep_35V.1186.1186.2.dta |
| GPSGXVSAQXLR 5 9 9 0 1119 | 1 | 720.8668 | 1439.719 | 2 | 30.94 | 0.00017  | GPSGLVSLAQLYK  | Phospho (ST) | 0.0000001000000.0 | Synth_pep_35V.1190.1190.2.dta |
| GPSGXVSAQXLR 3 2 3 1 648  | 1 | 723.8369 | 1445.659 | 2 | 43.48 | 0.00024  | GPSGFVSEALFK   | Phospho (ST) | 0.0000001000000.0 | Synth_pep_35V.1193.1193.2.dta |
| GPSGXVSAQXLR 5 8 8 0 1177 | 1 | 681.861  | 1361.708 | 2 | 81.66 | 7.20E-09 | GPSGLVSYAQLVR  | Phospho (ST) | 0.0000001000000.0 | Synth_pep_35V.1200.1200.2.dta |
| GPSGXVSAQXLR 3 2 3 0 647  | 1 | 737.8395 | 1473.664 | 2 | 73.26 | 2.00E-07 | GPSGFVSEALFR   | Phospho (ST) | 0.0000001000000.0 | Synth_pep_35V.1209.1209.2.dta |
| GPSGXVSAQXLR 1 8 3 1 368  | 1 | 692.8283 | 1383.642 | 2 | 37.04 | 0.0012   | GPSGDVSYAQLFK  | Phospho (ST) | 0.0000001000000.0 | Synth_pep_35V.1210.1210.2.dta |
| GPSGXVSAQXLR 0 8 3 0 167  | 1 | 684.8373 | 1367.66  | 2 | 41.65 | 0.00029  | GPSGAVSFAQLFR  | Phospho (ST) | 0.0000001000000.0 | Synth_pep_35V.1216.1216.2.dta |
| GPSGXVSAQXLR 5 5 0 0 1101 | 1 | 674.853  | 1347.692 | 2 | 56.16 | 2.40E-06 | GPSGLVSLAQLAR  | Phospho (ST) | 0.0000001000000.0 | Synth_pep_35V.1218.1218.2.dta |
| SXPFKXSLXFR 5 5 0 1 1102  | 1 | 495.6022 | 1483.785 | 3 | 38.69 | 0.00033  | SPPFKVSPFLAFGK | Phospho (ST) | 0.0000001000000.0 | Synth_pep_35V.1220.1220.3.dta |
| GPSGXVSAQXLR 5 7 8 0 1157 | 1 | 682.8493 | 1363.684 | 2 | 39.84 | 0.00033  | GPSGLVSTALVR   | Phospho (ST) | 0.0000001000000.0 | Synth_pep_35V.1224.1224.2.dta |
| GPSGXVSAQXLR 5 3 0 0 1061 | 1 | 691.8449 | 1381.675 | 2 | 45.54 | 4.20E-05 | GPSGLVSAQLAR   | Phospho (ST) | 0.0000001000000.0 | Synth_pep_35V.1226.1226.2.dta |
| SXPFKXSLXFR 7 3 3 1 1468  | 1 | 528.2623 | 1581.765 | 3 | 17.48 | 0.027    | SPPFKVSPFLFFGK | Phospho (ST) | 0.0000001000000.0 | Synth_pep_35V.1235.1235.3.dta |
| GPSGXVSAQXLR 2 3 5 1 472  | 1 | 706.8434 | 1411.672 | 2 | 40.31 | 0.00041  | SPPGEVSAQLLK   | Phospho (ST) | 0.0000001000000.0 | Synth_pep_35V.1236.1236.2.dta |
| GPSGXVSAQXLR 2 5 5 1 512  | 1 | 689.8531 | 1377.692 | 2 | 45.2  | 0.00014  | GPSGEVSLAQLLK  | Phospho (ST) | 0.0000001000000.0 | Synth_pep_35V.1240.1240.2.dta |
| SXPFKXSLXFR 5 5 9 1 1120  | 1 | 526.2778 | 1575.812 | 3 | 59.08 | 1.20E-06 | SPPFKVSPFLYFGK | Phospho (ST) | 0.0000001000000.0 | Synth_pep_35V.1248.1248.3.dta |
| GPSGXVSAQXLR 5 9 5 0 1191 | 1 | 720.8678 | 1439.721 | 2 | 19.05 | 0.026    | GPSGLVSYAQLLR  | Phospho (ST) | 0.0000001000000.0 | Synth_pep_35V.1249.1249.2.dta |
| GPSGXVSAQXLR 6 5 3 1 1308 | 1 | 685.8398 | 1369.665 | 2 | 42.91 | 0.00031  | GPSGSVLAQLFK   | Phospho (ST) | 0.0000001000000.0 | Synth_pep_35V.1256.1256.2.dta |
| GPSGXVSAQXLR 2 5 5 0 511  | 1 | 703.8556 | 1405.697 | 2 | 56.06 | 1.80E-05 | GPSGEVSLAQLK   | Phospho (ST) | 0.0000001000000.0 | Synth_pep_35V.1258.1258.2.dta |
| GPSGXVSAQXLR 3 9 4 0 789  | 1 | 709.8258 | 1417.637 | 2 | 25.65 | 0.017    | GPSGFVSYAQLGR  | Phospho (ST) | 0.0000001000000.0 | Synth_pep_35V.1261.1261.2.dta |
| GPSGXVSAQXLR 3 5 9 1 720  | 1 | 723.8558 | 1445.697 | 2 | 38.5  | 0.00081  | GPSGFVSLAQLYK  | Phospho (ST) | 0.0000001000000.0 | Synth_pep_35V.1264.1264.2.dta |
| GPSGXVSAQXLR 6 3 3 1 1268 | 1 | 702.8321 | 1403.65  | 2 | 41.29 | 0.0007   | GPSGSVSAQLFK   | Phospho (ST) | 0.0000001000000.0 | Synth_pep_35V.1272.1272.2.dta |
| GPSGXVSAQXLR 8 5 8 0 1717 | 1 | 681.8618 | 1361.709 | 2 | 63.9  | 4.30E-07 | GPSGLVSLAQLVR  | Phospho (ST) | 0.0000001000000.0 | Synth_pep_35V.1278.1278.2.dta |
| GPSGXVSAQXLR 3 3 9 1 680  | 1 | 740.8475 | 1479.68  | 2 | 30.74 | 0.00083  | GPSGFVSAQLYK   | Phospho (ST) | 0.0000001000000.0 | Synth_pep_35V.1282.1282.2.dta |
| GPSGXVSAQXLR 0 5 5 0 1111 | 1 | 674.8531 | 1347.692 | 2 | 59.45 | 1.10E-06 | GPSGAVSLAQLLR  | Phospho (ST) | 0.0000001000000.0 | Synth_pep_35V.1289.1289.2.dta |
| GPSGXVSAQXLR 2 5 3 1 508  | 1 | 706.8449 | 1411.675 | 2 | 44.4  | 0.00015  | GPSGEVSLAQLFK  | Phospho (ST) | 0.0000001000000.0 | Synth_pep_35V.1297.1297.2.dta |
| GPSGXVSAQXLR 1 5 3 1 308  | 1 | 699.8369 | 1397.659 | 2 | 37.87 | 0.001    | GPSGDVSLAQLFK  | Phospho (ST) | 0.0000001000000.0 | Synth_pep_35V.1299.1299.2.dta |
| GPSGXVSAQXLR 0 5 3 0 107  | 1 | 691.8447 | 1381.675 | 2 | 56.93 | 4.90E-06 | GPSGAVSFAQLFR  | Phospho (ST) | 0.0000001000000.0 | Synth_pep_35V.1306.1306.2.dta |
| GPSGXVSAQXLR 5 8 5 0 1171 | 1 | 688.8691 | 1375.724 | 2 | 55.76 | 6.00E-06 | GPSGLVSYAQLLR  | Phospho (ST) | 0.0000001000000.0 | Synth_pep_35V.1322.1322.2.dta |
| GPSGXVSAQXLR 8 5 3 1 1708 | 1 | 691.8587 | 1381.703 | 2 | 40.34 | 0.00033  | GPSGLVSLAQLFK  | Phospho (ST) | 0.0000001000000.0 | Synth_pep_35V.1376.1376.2.dta |
| GPSGXVSAQXLR 9 7 5 0 1951 | 1 | 476.9029 | 1427.687 | 3 | 38.26 | 0.00045  | GPSGVVSTALQR   | Phospho (ST) | 0.0000001000000.0 | Synth_pep_35V.1430.1430.3.dta |
| GPSGXVSAQXLR 7 9 3 0 1587 | 1 | 488.2307 | 1461.67  | 3 | 34.22 | 0.0014   | GPSGTVSYAQLFR  | Phospho (ST) | 0.0000001000000.0 | Synth_pep_35V.1483.1483.3.dta |
| GPSGXVSAQXLR 2 1 6 1 434  | 1 | 677.7975 | 1353.58  | 2 | 32.9  | 0.0017   | GPSGEVSDAQLSK  | Phospho (ST) | 0.0000001000000.0 | Synth_pep_35V.730.730.2.dta   |
| GPSGXVSAQXLR 2 1 2 1 426  | 1 | 698.8026 | 1395.591 | 2 | 44.61 | 0.00054  | GPSGEVSDAQLK   | Phospho (ST) | 0.0000001000000.0 | Synth_pep_35V.741.741.2.dta   |
| GPSGXVSAQXLR 2 4 2 1 486  | 1 | 669.8024 | 1337.59  | 2 | 29.36 | 0.00057  | GPSGEVSAQLK    | Phospho (ST) | 0.0000001000000.0 | Synth_pep_35V.746.746.2.dta   |
| GPSGXVSAQXLR 2 1 2 0 425  | 1 | 712.8053 | 1423.596 | 2 | 59.27 |          |                |              |                   |                               |

|                           |   |          |          |   |       |          |                |              |                  |                               |
|---------------------------|---|----------|----------|---|-------|----------|----------------|--------------|------------------|-------------------------------|
| GPSGVXSAQXLR 2 8 2 0 565  | 1 | 704.827  | 1407.64  | 2 | 52.15 | 3.90E-05 | GPSGEVSAQLER   | Phospho (ST) | 0.00000010000000 | Synth_pep_35V.916.916.2.dta   |
| GPSGVXSAQXLR 6 8 0 1 1362 | 1 | 640.8184 | 1279.622 | 2 | 26.53 | 0.008    | GPSGSVSAQQLAK  | Phospho (ST) | 0.00000010000000 | Synth_pep_35V.917.917.2.dta   |
| GPSGVXSAQXLR 1 9 9 1 400  | 1 | 732.8243 | 1463.634 | 2 | 46.68 | 0.00011  | GPSGDVSAQLYK   | Phospho (ST) | 0.00000010000000 | Synth_pep_35V.929.929.2.dta   |
| GPSGVXSAQXLR 8 2 9 1 1660 | 1 | 707.8364 | 1413.658 | 2 | 38.02 | 0.0009   | GPSGVVSAQLYK   | Phospho (ST) | 0.00000010000000 | Synth_pep_35V.930.930.2.dta   |
| GPSGVXSAQXLR 2 2 5 1 452  | 1 | 697.8337 | 1393.653 | 2 | 38.04 | 0.00035  | GPSGVEAQLLK    | Phospho (ST) | 0.00000010000000 | Synth_pep_35V.934.934.2.dta   |
| GPSGVXSAQXLR 5 2 4 0 1049 | 1 | 675.8233 | 1349.632 | 2 | 58.67 | 5.40E-06 | GPSGLVSAQQLGR  | Phospho (ST) | 0.00000010000000 | Synth_pep_35V.936.936.2.dta   |
| GPSGVXSAQXLR 7 9 9 1 1600 | 1 | 725.8337 | 1449.653 | 2 | 28.45 | 0.021    | GPSGTVSAQLYK   | Phospho (ST) | 0.00000010000000 | Synth_pep_35V.940.940.2.dta   |
| GPSGVXSAQXLR 2 2 5 0 451  | 1 | 711.8337 | 1421.653 | 2 | 75.28 | 1.40E-07 | GPSGVEAQLLR    | Phospho (ST) | 0.00000010000000 | Synth_pep_35V.941.941.2.dta   |
| GPSGVXSAQXLR 6 9 8 1 1398 | 1 | 686.8298 | 1371.645 | 2 | 39.85 | 0.0011   | GPSGSVSAQLYK   | Phospho (ST) | 0.00000010000000 | Synth_pep_35V.944.944.2.dta   |
| SXPFKXSPLXFR 4 7 0 0 941  | 1 | 482.2374 | 1443.69  | 3 | 42.71 | 0.00021  | SGPFKTSPLAFGR  | Phospho (ST) | 0.00000010000000 | Synth_pep_35V.947.947.3.dta   |
| GPSGVXSAQXLR 3 1 2 0 625  | 1 | 721.8164 | 1441.618 | 2 | 24.23 | 0.0083   | GPSGFVSDAQLER  | Phospho (ST) | 0.00000010000000 | Synth_pep_35V.949.949.2.dta   |
| GPSGVXSAQXLR 0 9 9 1 200  | 1 | 710.8286 | 1419.643 | 2 | 44.36 | 0.00026  | GPSGAVSAQLYK   | Phospho (ST) | 0.00000010000000 | Synth_pep_35V.952.952.2.dta   |
| SXPFKXSPLXFR 0 0 9 1 20   | 1 | 498.2462 | 1491.717 | 3 | 54.26 | 2.50E-05 | SAPFKSPLVYFGK  | Phospho (ST) | 0.00000010000000 | Synth_pep_35V.962.962.3.dta   |
| GPSGVXSAQXLR 0 9 9 0 199  | 1 | 724.8318 | 1447.649 | 2 | 54.48 | 2.90E-05 | GPSGAVSAQLYR   | Phospho (ST) | 0.00000010000000 | Synth_pep_35V.969.969.2.dta   |
| SXPFKXSPLXFR 6 0 9 1 1220 | 1 | 503.5777 | 1507.711 | 3 | 69.1  | 1.10E-06 | SGPFKASPLVYFGK | Phospho (ST) | 0.00000010000000 | Synth_pep_35V.971.971.3.dta   |
| SXPFKXSPLXFR 4 1 8 0 837  | 1 | 496.2406 | 1485.7   | 3 | 40.72 | 0.00044  | SGPFKDSPLVFR   | Phospho (ST) | 0.00000010000000 | Synth_pep_35V.976.976.3.dta   |
| GPSGVXSAQXLR 0 9 8 0 197  | 1 | 692.8345 | 1383.655 | 2 | 42.86 | 0.00014  | GPSGAVSAQLYR   | Phospho (ST) | 0.00000010000000 | Synth_pep_35V.984.984.2.dta   |
| GPSGVXSAQXLR 6 5 0 0 1301 | 1 | 661.8237 | 1321.633 | 2 | 49.35 | 0.00011  | GPSGSVSLAQLAR  | Phospho (ST) | 0.00000010000000 | Synth_pep_35V.992.992.2.dta   |
| GPSGVXSAQXLR 2 2 0 0 441  | 1 | 690.8146 | 1379.615 | 2 | 81.53 | 8.20E-08 | GPSGEVSAQLAR   | Phospho (ST) | 0.00000010000000 | AIC_synth_375.802.802.2.dta   |
| GPSGVXSAQXLR 0 0 5 0 11   | 1 | 653.8301 | 1305.646 | 2 | 68.24 | 1.50E-07 | GPSGAVSAQQLR   | Phospho (ST) | 0.00000010000000 | AIC_synth_375.1172.1172.2.dta |
| SXPFKXSPLXFR 4 5 0 1 902  | 1 | 476.9151 | 1427.724 | 3 | 70.04 | 2.40E-07 | SGPFKLSPLAFGR  | Phospho (ST) | 0.00000010000000 | AIC_synth_375.1346.1346.3.dta |
| GPSGVXSAQXLR 5 9 0 0 1181 | 1 | 699.8442 | 1397.674 | 2 | 64.31 | 1.00E-06 | GPSGLVSAQQLAR  | Phospho (ST) | 0.00000010000000 | AIC_synth_375.1296.1296.2.dta |
| GPSGVXSAQXLR 0 0 0 0 1    | 1 | 632.8083 | 1263.602 | 2 | 59.13 | 1.20E-06 | GPSGAVSAQQLAR  | Phospho (ST) | 0.00000010000000 | AIC_synth_375.842.842.2.dta   |
| GPSGVXSAQXLR 9 1 6 0 1833 | 1 | 708.8139 | 1415.613 | 2 | 65.86 | 1.50E-06 | GPSGVVSDAQLSR  | Phospho (ST) | 0.00000010000000 | AIC_synth_375.866.866.2.dta   |
| SXPFKXSPLXFR 4 3 0 1 862  | 1 | 488.2426 | 1461.706 | 3 | 60.06 | 1.60E-06 | SGPFKTSPLAFGR  | Phospho (ST) | 0.00000010000000 | AIC_synth_375.1430.1430.3.dta |
| GPSGVXSAQXLR 0 9 0 0 181  | 1 | 678.8194 | 1355.624 | 2 | 61.26 | 1.70E-06 | GPSGAVSAQQLAR  | Phospho (ST) | 0.00000010000000 | AIC_synth_375.994.994.2.dta   |
| GPSGVXSAQXLR 9 1 7 0 1835 | 1 | 715.8173 | 1429.62  | 2 | 63.37 | 2.00E-06 | GPSGVVSDAQLTR  | Phospho (ST) | 0.00000010000000 | AIC_synth_375.904.904.2.dta   |
| SXPFKXSPLXFR 0 0 0 1 2    | 1 | 467.5715 | 1399.693 | 3 | 59.36 | 3.00E-06 | SAPFKASPLAFGR  | Phospho (ST) | 0.00000010000000 | AIC_synth_375.1043.1043.3.dta |
| GPSGVXSAQXLR 2 1 6 0 433  | 1 | 691.7997 | 1381.585 | 2 | 61.58 | 3.00E-06 | GPSGEVSDAQLSR  | Phospho (ST) | 0.00000010000000 | AIC_synth_375.752.752.2.dta   |
| SXPFKXSPLXFR 7 9 9 1 1600 | 1 | 538.9257 | 1613.755 | 3 | 59.75 | 3.00E-06 | SXPFKYSPLVYFGK | Phospho (ST) | 0.00000010000000 | AIC_synth_375.1250.1250.3.dta |
| GPSGVXSAQXLR 0 2 8 0 57   | 1 | 675.8235 | 1349.632 | 2 | 61.03 | 3.10E-06 | GPSGAVSAQLYR   | Phospho (ST) | 0.00000010000000 | AIC_synth_375.930.930.2.dta   |
| SXPFKXSPLXFR 4 6 0 1 922  | 1 | 468.2313 | 1401.672 | 3 | 63    | 3.20E-06 | SGPFKTSPLAFGR  | Phospho (ST) | 0.00000010000000 | AIC_synth_375.989.989.3.dta   |
| SXPFKXSPLXFR 0 0 3 1 8    | 1 | 492.9147 | 1475.722 | 3 | 54.2  | 4.60E-06 | SAPFKASPLVYFGK | Phospho (ST) | 0.00000010000000 | AIC_synth_375.1267.1267.3.dta |
| GPSGVXSAQXLR 0 4 0 1 82   | 1 | 611.7979 | 1221.581 | 2 | 53.2  | 4.80E-06 | GPSGAVSAQQLAK  | Phospho (ST) | 0.00000010000000 | AIC_synth_375.743.743.2.dta   |
| GPSGVXSAQXLR 8 2 7 0 1655 | 1 | 690.8298 | 1379.645 | 2 | 59.55 | 5.20E-06 | GPSGVVSAQQLTR  | Phospho (ST) | 0.00000010000000 | AIC_synth_375.946.946.2.dta   |
| SXPFKXSPLXFR 8 9 9 1 1800 | 1 | 538.2653 | 1611.774 | 3 | 53.61 | 5.20E-06 | SVPFKYSPLVYFGK | Phospho (ST) | 0.00000010000000 | AIC_synth_375.1306.1306.3.dta |
| SXPFKXSPLXFR 4 4 0 1 882  | 1 | 458.2272 | 1371.66  | 3 | 58    | 5.90E-06 | SGPFKTSPLAFGR  | Phospho (ST) | 0.00000010000000 | AIC_synth_375.996.996.3.dta   |
| SXPFKXSPLXFR 6 4 2 1 1286 | 1 | 487.5655 | 1459.675 | 3 | 58.62 | 7.40E-06 | SPPFKSPLVYFGK  | Phospho (ST) | 0.00000010000000 | AIC_synth_375.1010.1010.3.dta |
| SXPFKXSPLXFR 5 0 5 1 1012 | 1 | 495.6027 | 1483.786 | 3 | 53.74 | 8.20E-06 | SXPFKASPLVYFGK | Phospho (ST) | 0.00000010000000 | AIC_synth_375.1420.1420.3.dta |
| GPSGVXSAQXLR 0 0 8 0 17   | 1 | 646.8223 | 1291.63  | 2 | 53.62 | 8.50E-06 | GPSGAVSAQQLVR  | Phospho (ST) | 0.00000010000000 | AIC_synth_375.979.979.2.dta   |
| GPSGVXSAQXLR 2 2 3 0 447  | 1 | 728.8268 | 1455.639 | 2 | 56.39 | 9.50E-06 | GPSGEVSAQLFR   | Phospho (ST) | 0.00000010000000 | AIC_synth_375.1187.1187.2.dta |
| SXPFKXSPLXFR 4 0 0 1 802  | 1 | 462.8993 | 1385.676 | 3 | 53.63 | 1.20E-05 | SGPFKASPLAFGR  | Phospho (ST) | 0.00000010000000 | AIC_synth_375.1044.1044.3.dta |
| GPSGVXSAQXLR 6 2 6 1 1254 | 1 | 663.8029 | 1325.591 | 2 | 55.82 | 1.20E-05 | GPSGSVSAQQLSK  | Phospho (ST) | 0.00000010000000 | AIC_synth_375.736.736.2.dta   |
| SXPFKXSPLXFR 0 5 0 1 102  | 1 | 481.5869 | 1441.739 | 3 | 51.75 | 1.30E-05 | SAPFKLSPLAFGR  | Phospho (ST) | 0.00000010000000 | AIC_synth_375.1354.1354.3.dta |
| SXPFKXSPLXFR 0 4 2 1 86   | 1 | 482.2347 | 1443.682 | 3 | 56.1  | 1.30E-05 | SAPFKSPLVYFGK  | Phospho (ST) | 0.00000010000000 | AIC_synth_375.992.992.3.dta   |
| GPSGVXSAQXLR 1 0 3 1 208  | 1 | 678.8132 | 1355.612 | 2 | 58.58 | 1.40E-05 | GPSGDVSAQQLFK  | Phospho (ST) | 0.00000010000000 | AIC_synth_375.1218.1218.2.dta |
| GPSGVXSAQXLR 2 2 5 0 451  | 1 | 711.8339 | 1421.653 | 2 | 54.63 | 1.60E-05 | GPSGEVSAQQLR   | Phospho (ST) | 0.00000010000000 | AIC_synth_375.1074.1074.2.dta |
| SXPFKXSPLXFR 8 8 9 1 1780 | 1 | 516.9344 | 1547.782 | 3 | 51.69 | 1.70E-05 | SVPFKVSPVYFGK  | Phospho (ST) | 0.00000010000000 | AIC_synth_375.1362.1362.3.dta |
| SXPFKXSPLXFR 4 8 0 1 962  | 1 | 472.243  | 1413.707 | 3 | 53.54 | 1.90E-05 | SGPFKTSPLAFGR  | Phospho (ST) | 0.00000010000000 | AIC_synth_375.1212.1212.3.dta |
| GPSGVXSAQXLR 0 1 4 0 29   | 1 | 647.7952 | 1293.576 | 2 | 58.29 | 2.10E-05 | GPSGAVSAQQLGR  | Phospho (ST) | 0.00000010000000 | AIC_synth_375.774.774.2.dta   |
| SXPFKXSPLXFR 6 5 9 1 1320 | 1 | 517.5938 | 1459.579 | 3 | 52.94 | 2.10E-05 | SXPFKLSPLVYFGK | Phospho (ST) | 0.00000010000000 | AIC_synth_375.1426.1426.3.dta |
| GPSGVXSAQXLR 0 9 4 0 189  | 1 | 671.8134 | 1341.612 | 2 | 48.86 | 2.30E-05 | GPSGAVSAQQLGR  | Phospho (ST) | 0.00000010000000 | AIC_synth_375.954.954.2.dta   |
| SXPFKXSPLXFR 6 5 5 1 1312 | 1 | 500.9344 | 1499.781 | 3 | 49.57 | 2.60E-05 | SXPFKLSPLVYFGK | Phospho (ST) | 0.00000010000000 | AIC_synth_375.1571.1571.3.dta |
| SXPFKXSPLXFR 4 0 0 0 801  | 1 | 472.2344 | 1413.681 | 3 | 54.38 | 2.60E-05 | SGPFKASPLAFGR  | Phospho (ST) | 0.00000010000000 | AIC_synth_375.1082.1082.3.dta |
| GPSGVXSAQXLR 8 2 4 0 1649 | 1 | 668.8154 | 1335.616 | 2 | 51.22 | 2.80E-05 | GPSGVVSAQQLGR  | Phospho (ST) | 0.00000010000000 | AIC_synth_375.931.931.2.dta   |
| GPSGVXSAQXLR 0 9 9 1 200  | 1 | 710.8292 | 1419.644 | 2 | 54.61 | 2.90E-05 | GPSGAVSAQLYK   | Phospho (ST) | 0.00000010000000 | AIC_synth_375.1084.1084.2.dta |
| GPSGVXSAQXLR 4 4 0 0 881  | 1 | 618.7932 | 1235.572 | 2 | 51.11 | 2.90E-05 | GPSGGVSAQQLAR  | Phospho (ST) | 0.00000010000000 | AIC_synth_375.759.759.2.dta   |
| SXPFKXSPLXFR 1 3 0 0 261  | 1 | 516.9136 | 1547.719 | 3 | 49.79 | 3.80E-05 | SDPFKTSPLAFGR  | Phospho (ST) | 0.00000010000000 | AIC_synth_375.1530.1530.3.dta |
| GPSGVXSAQXLR 3 1 6 0 633  | 1 | 700.8145 | 1399.614 | 2 | 50.79 | 3.90E-05 | GPSGVVSDAQLSR  | Phospho (ST) | 0.00000010000000 | AIC_synth_375.1042.1042.2.dta |
| SXPFKXSPLXFR 4 5 9 1 920  | 1 | 507.5904 | 1519.749 | 3 | 50.85 | 4.30E-05 | SGPFKLSPLVYFGK | Phospho (ST) | 0.00000010000000 | AIC_synth_375.1410.1410.3.dta |
| SXPFKXSPLXFR 0 8 9 1 180  | 1 | 507.5908 | 1519.751 | 3 | 49.02 | 5.40E-05 | SAPFKVSPVYFGK  | Phospho (ST) | 0.00000010000000 | AIC_synth_375.1298.1298.3.dta |
| GPSGVXSAQXLR 2 1 6 1 434  | 1 | 677.8    | 1353.586 | 2 | 44.75 | 5.50E-05 | GPSGEVSDAQLSK  | Phospho (ST) | 0.00000010000000 | AIC_synth_375.734.734.2.dta   |
| GPSGVXSAQXLR 2 1 4 1 430  | 1 | 662.7925 | 1323.571 | 2 | 50.07 | 5.70E-05 | GPSGEVSDAQLGK  | Phospho (ST) | 0.00000010000000 | AIC_synth_375.751.751.2.dta   |
| SXPFKXSPLXFR 6 9 9 1 1400 | 1 | 534.2541 | 1599.74  | 3 | 48.35 | 5.70E-05 | SXPFKYSPLVYFGK | Phospho (ST) | 0.00000010000000 | AIC_synth_375.1252.1252.3.dta |
| SXPFKXSPLXFR 0 9 9 1 200  | 1 | 528.9221 | 1583.745 | 3 | 48.63 | 6.00E-05 | SAPFKVSPVYFGK  | Phospho (ST) | 0.00000010000000 | AIC_synth_375.1235.1235.3.dta |
| SXPFKXSPLXFR 4 9 0 0 981  | 1 | 502.9102 | 1505.709 | 3 | 46.89 | 6.10E-05 | SGPFKYSPLAFGR  | Phospho (ST) | 0.00000010000000 | AIC_synth_375.1226.1226.3.dta |
| GPSGVXSAQXLR 0 2 0 0 41   | 1 | 661.8111 | 1321.608 | 2 | 46.65 | 6.60E-05 | GPSGAVSAQQLAR  | Phospho (ST) | 0.00000010000000 | AIC_synth_375.810.810.2.dta   |
| SXPFKXSPLXFR 5 8 9 1 1180 | 1 | 521.6066 | 1561.798 | 3 | 43.65 | 7.10E-05 | SXPFKYSPLVYFGK | Phospho (ST) | 0.00000010000000 | AIC_synth_375.1482.1482.3.dta |
| SXPFKXSPLXFR 7 4 0 1 1482 | 1 | 472.9032 | 1415.688 | 3 | 48.73 | 8.10E-05 | STPFKTSPLAFGR  | Phospho (ST) | 0.00000010000000 | AIC_synth_375.990.990.3.dta   |
| SXPFKXSPLXFR 4 6 9 1 940  | 1 | 498.905  | 1493.693 | 3 | 50.53 | 8.20E-05 | SGPFKYSPLVYFGK | Phospho (ST) | 0.00000010000000 | AIC_synth_375.1055.1055.3.dta |
| GPSGVXSAQXLR 5 3 3 1 1108 | 1 | 466.2478 | 1395.722 | 3 | 44.39 | 8.60E-05 | GPSGLVSLAQLFK  | Phospho (ST) | 0.00000010000000 | AIC_synth_375.1962.1962.3.dta |
| GPSGVXSAQXLR 6 9 4 1 1390 | 1 | 665.8065 | 1329.598 | 2 | 48.96 | 8.90E-05 | GPSGSVSAQQLGK  | Phospho (ST) | 0.00000010000000 | AIC_synth_375.875.875.2.dta   |
| GPSGVXSAQXLR 0 5 0 1 102  | 1 | 639.8269 | 1277.639 | 2 | 44.71 | 9.10E-05 | GPSGAVSAQQLAK  | Phospho (ST) | 0.00000010000000 | AIC_synth_375.1171.1171.2.dta |
| GPSGVXSAQXLR 6 9 5 0 1391 | 1 | 707.8399 | 1413.665 | 2 | 46.42 | 9.20E-05 | GPSGSVSAQQLR   | Phospho (ST) | 0.00000010000000 | AIC_synth_375.1276.1276.2.dta |
| GPSGVXSAQXLR 8 4 0 0 1681 | 1 | 639.8167 | 1277.619 | 2 | 46.39 | 0.0001   | GPSGVVSAQQLAR  | Phospho (ST) | 0.00000010000000 | AIC_synth_375.867.867.2.dta   |
| GPSGVXSAQXLR 8 8 0 0 1761 | 1 | 660.8387 | 1319.663 | 2 | 42.09 | 0.0001   | GPSGVVSAQQLAR  | Phospho (ST) | 0.00000010000000 | AIC_synth_375.1178.1178.2.dta |
| SXPFKXSPLXFR 6 5 2 1 1306 | 1 | 506.2542 | 1515.741 | 3 | 45.64 | 0.00011  | SGPFKLSPLVYFGK | Phospho (ST) | 0.00000010000000 | AIC_synth_375.1364.1364.3.dta |
| GPSGVXSAQXLR 5 1 6 0 1033 | 1 | 683.8224 | 1365.63  | 2 | 46.04 | 0.00012  | GPSGLVSDAQLSR  | Phospho (ST) | 0.00000010000000 | AIC_synth_375.1002.1002.2.dta |
| GPSGVXSAQXLR 6 5 0 0 1301 | 1 | 661.     |          |   |       |          |                |              |                  |                               |

|                           |   |          |          |   |       |         |               |              |                 |                               |
|---------------------------|---|----------|----------|---|-------|---------|---------------|--------------|-----------------|-------------------------------|
| GPSGVXSAQXLR 8 9 3 1 1788 | 1 | 716.8479 | 1431.681 | 2 | 42.34 | 0.00038 | GPSGVVSYAQLFK | Phospho (ST) | 0.0000001000000 | AJC_synth_375.1562.1562.2.dta |
| GPSGVXSAQXLR 2 8 8 0 577  | 1 | 689.8403 | 1377.666 | 2 | 39.45 | 0.00038 | GPSGVEVSAQXLR | Phospho (ST) | 0.0000001000000 | AJC_synth_375.1196.1196.2.dta |
| SXPFKXSPLXFR 0 4 9 1 100  | 1 | 493.5748 | 1477.703 | 3 | 42.81 | 0.00042 | SAPFKKSPLYFGK | Phospho (ST) | 0.0000001000000 | AJC_synth_375.1047.1047.3.dta |
| SXPFKXSPLXFR 5 3 1 0 1063 | 1 | 530.929  | 1589.765 | 3 | 38.91 | 0.00044 | SLPFKPSPLDFGR | Phospho (ST) | 0.0000001000000 | AJC_synth_375.1666.1666.3.dta |
| GPSGVXSAQXLR 8 8 8 0 1777 | 1 | 674.8535 | 1347.692 | 2 | 33.37 | 0.00046 | GPSGVVSYAQLVR | Phospho (ST) | 0.0000001000000 | AJC_synth_375.1356.1356.2.dta |
| SXPFKXSPLXFR 4 1 9 1 840  | 1 | 508.2376 | 1521.691 | 3 | 42.6  | 0.00047 | SGPFKDSPLYFGK | Phospho (ST) | 0.0000001000000 | AJC_synth_375.1100.1100.3.dta |
| SXPFKXSPLXFR 8 0 8 1 1618 | 1 | 486.2582 | 1455.753 | 3 | 39.82 | 0.00047 | SVPFKASPLVFGK | Phospho (ST) | 0.0000001000000 | AJC_synth_375.1197.1197.3.dta |
| SXPFKXSPLXFR 8 0 9 1 1620 | 1 | 507.5903 | 1519.749 | 3 | 40.35 | 0.00048 | SVPFKASPLVFGK | Phospho (ST) | 0.0000001000000 | AJC_synth_375.1186.1186.3.dta |
| SXPFKXSPLXFR 2 9 9 1 600  | 1 | 548.2568 | 1641.749 | 3 | 32.98 | 0.0005  | SEPFKSPLYFGK  | Phospho (ST) | 0.0000001000000 | AJC_synth_375.1258.1258.3.dta |
| SXPFKXSPLXFR 4 4 2 1 886  | 1 | 477.562  | 1429.664 | 3 | 40.5  | 0.00056 | SGPFKSPLEFGK  | Phospho (ST) | 0.0000001000000 | AJC_synth_375.1011.1011.3.dta |
| GPSGVXSAQXLR 2 4 2 1 486  | 1 | 669.803  | 1337.591 | 2 | 41.37 | 0.00057 | GPSGVEVSAQLEK | Phospho (ST) | 0.0000001000000 | AJC_synth_375.766.766.2.dta   |
| GPSGVXSAQXLR 8 2 6 1 1654 | 1 | 669.8197 | 1337.625 | 2 | 38.16 | 0.0006  | GPSGVVSEQAQSK | Phospho (ST) | 0.0000001000000 | AJC_synth_375.874.874.2.dta   |
| SXPFKXSPLXFR 0 6 9 1 140  | 1 | 503.5772 | 1507.71  | 3 | 41.66 | 0.00061 | SAPFKKSPLYFGK | Phospho (ST) | 0.0000001000000 | AJC_synth_375.1051.1051.3.dta |
| GPSGVXSAQXLR 8 9 0 0 1797 | 1 | 706.8507 | 1411.687 | 2 | 33.93 | 0.00061 | GPSGVVSYAQLVR | Phospho (ST) | 0.0000001000000 | AJC_synth_375.1304.1304.2.dta |
| GPSGVXSAQXLR 0 9 4 1 190  | 1 | 657.8081 | 1313.602 | 2 | 40.2  | 0.00063 | GPSGVVSYAQLGK | Phospho (ST) | 0.0000001000000 | AJC_synth_375.922.922.2.dta   |
| SXPFKXSPLXFR 5 6 9 1 1140 | 1 | 517.5945 | 1549.762 | 3 | 37.26 | 0.00065 | SLPFKSPLYFGK  | Phospho (ST) | 0.0000001000000 | AJC_synth_375.1251.1251.3.dta |
| GPSGVXSAQXLR 7 8 8 0 1577 | 1 | 675.8434 | 1349.672 | 2 | 36.64 | 0.00065 | GPSGVVSYAQLVR | Phospho (ST) | 0.0000001000000 | AJC_synth_375.1199.1199.2.dta |
| SXPFKXSPLXFR 6 3 9 1 1280 | 1 | 528.9221 | 1583.744 | 3 | 38.05 | 0.00068 | SGPFKDSPLYFGK | Phospho (ST) | 0.0000001000000 | AJC_synth_375.1467.1467.3.dta |
| GPSGVXSAQXLR 6 9 6 1 1394 | 1 | 680.8128 | 1359.611 | 2 | 42.54 | 0.00068 | GPSGVSVAQSK   | Phospho (ST) | 0.0000001000000 | AJC_synth_375.855.855.2.dta   |
| SXPFKXSPLXFR 4 2 0 0 841  | 1 | 491.569  | 1471.685 | 3 | 38.81 | 0.00069 | SGPFKESPLAFGR | Phospho (ST) | 0.0000001000000 | AJC_synth_375.1059.1059.3.dta |
| SXPFKXSPLXFR 4 6 4 1 930  | 1 | 463.5587 | 1387.654 | 3 | 41    | 0.00072 | SGPFKSPLEFGK  | Phospho (ST) | 0.0000001000000 | AJC_synth_375.978.978.3.dta   |
| GPSGVXSAQXLR 6 1 6 1 1234 | 1 | 656.7913 | 1311.568 | 2 | 31.23 | 0.00075 | GPSGVDVSAQLSK | Phospho (ST) | 0.0000001000000 | AJC_synth_375.721.721.2.dta   |
| SXPFKXSPLXFR 5 0 0 0 1001 | 1 | 490.9209 | 1469.741 | 3 | 36.08 | 0.00078 | SLPFKASPLAFGR | Phospho (ST) | 0.0000001000000 | AJC_synth_375.1282.1282.3.dta |
| GPSGVXSAQXLR 0 4 6 1 94   | 1 | 619.7938 | 1237.573 | 2 | 38.26 | 0.0008  | GPSGVVSEQAQSK | Phospho (ST) | 0.0000001000000 | AJC_synth_375.726.726.2.dta   |
| GPSGVXSAQXLR 2 9 4 1 590  | 1 | 686.8132 | 1371.612 | 2 | 40.28 | 0.00086 | GPSGVEVSAQLEK | Phospho (ST) | 0.0000001000000 | AJC_synth_375.914.914.2.dta   |
| GPSGVXSAQXLR 5 5 5 1 1112 | 1 | 454.9194 | 1361.736 | 3 | 34.08 | 0.00088 | GPSGLVSLAQLK  | Phospho (ST) | 0.0000001000000 | AJC_synth_375.1882.1882.3.dta |
| SXPFKXSPLXFR 4 4 1 0 883  | 1 | 482.2244 | 1443.651 | 3 | 34.85 | 0.001   | SGPFKSPLEDFGR | Phospho (ST) | 0.0000001000000 | AJC_synth_375.1102.1102.3.dta |
| GPSGVXSAQXLR 1 1 6 0 233  | 1 | 684.7902 | 1367.566 | 2 | 33.15 | 0.001   | GPSGVDVSAQLSR | Phospho (ST) | 0.0000001000000 | AJC_synth_375.754.754.2.dta   |
| SXPFKXSPLXFR 1 0 0 0 201  | 1 | 491.5694 | 1471.686 | 3 | 36.62 | 0.0011  | SDPFKASPLAFGR | Phospho (ST) | 0.0000001000000 | AJC_synth_375.1170.1170.3.dta |
| SXPFKXSPLXFR 4 9 3 1 988  | 1 | 518.9174 | 1553.73  | 3 | 35.39 | 0.0011  | SGPFKYSPLFFGK | Phospho (ST) | 0.0000001000000 | AJC_synth_375.1411.1411.3.dta |
| GPSGVXSAQXLR 6 9 0 0 1381 | 1 | 458.2156 | 1371.625 | 3 | 36.23 | 0.0013  | GPSGVSVAQLR   | Phospho (ST) | 0.0000001000000 | AJC_synth_375.1325.1325.3.dta |
| GPSGVXSAQXLR 1 0 4 1 210  | 1 | 633.7926 | 1265.571 | 2 | 39.71 | 0.0014  | GPSGVDVSAQLEK | Phospho (ST) | 0.0000001000000 | AJC_synth_375.735.735.2.dta   |
| GPSGVXSAQXLR 1 9 9 1 400  | 1 | 732.8229 | 1463.631 | 2 | 35.54 | 0.0014  | GPSGVDVSAQLYK | Phospho (ST) | 0.0000001000000 | AJC_synth_375.1053.1053.2.dta |
| GPSGVXSAQXLR 2 4 0 1 482  | 1 | 640.7971 | 1279.58  | 2 | 35.3  | 0.0015  | GPSGVEVSAQLEK | Phospho (ST) | 0.0000001000000 | AJC_synth_375.753.753.2.dta   |
| GPSGVXSAQXLR 5 3 5 1 1072 | 1 | 466.2477 | 1395.721 | 3 | 31.78 | 0.0016  | GPSGLVSLAQLK  | Phospho (ST) | 0.0000001000000 | AJC_synth_375.1860.1860.3.dta |
| SXPFKXSPLXFR 2 0 1 0 403  | 1 | 510.9044 | 1529.691 | 3 | 36.82 | 0.0017  | SEPFKESPLDFGR | Phospho (ST) | 0.0000001000000 | AJC_synth_375.1147.1147.3.dta |
| SXPFKXSPLXFR 2 2 1 0 443  | 1 | 530.2394 | 1587.697 | 3 | 31.65 | 0.0017  | SEPFKESPLDFGR | Phospho (ST) | 0.0000001000000 | AJC_synth_375.1115.1115.3.dta |
| SXPFKXSPLXFR 1 9 3 1 388  | 1 | 538.2531 | 1611.737 | 3 | 31.23 | 0.0017  | SDPFKYSPLFFGK | Phospho (ST) | 0.0000001000000 | AJC_synth_375.1492.1492.3.dta |
| GPSGVXSAQXLR 2 9 9 1 600  | 1 | 739.8322 | 1477.65  | 2 | 33.64 | 0.0018  | GPSGVEVSAQLYK | Phospho (ST) | 0.0000001000000 | AJC_synth_375.1068.1068.2.dta |
| SXPFKXSPLXFR 0 8 0 1 162  | 1 | 476.9155 | 1427.725 | 3 | 31.08 | 0.0019  | SAPFKKSPLEFGK | Phospho (ST) | 0.0000001000000 | AJC_synth_375.1236.1236.3.dta |
| GPSGVXSAQXLR 0 8 0 0 161  | 1 | 646.8208 | 1291.627 | 2 | 30.27 | 0.0021  | GPSGAVSVAQLR  | Phospho (ST) | 0.0000001000000 | AJC_synth_375.1104.1104.2.dta |
| SXPFKXSPLXFR 1 5 0 1 302  | 1 | 496.2505 | 1485.73  | 3 | 34.95 | 0.0022  | SDPFKLSPLAFGR | Phospho (ST) | 0.0000001000000 | AJC_synth_375.1458.1458.3.dta |
| SXPFKXSPLXFR 0 8 2 1 166  | 1 | 496.2503 | 1485.729 | 3 | 34.9  | 0.0022  | SAPFKVSPLEFGK | Phospho (ST) | 0.0000001000000 | AJC_synth_375.1230.1230.3.dta |
| GPSGVXSAQXLR 1 1 6 1 234  | 1 | 670.7913 | 1339.568 | 2 | 29.13 | 0.0024  | GPSGVDVSAQLSK | Phospho (ST) | 0.0000001000000 | AJC_synth_375.729.729.2.dta   |
| SXPFKXSPLXFR 2 9 5 1 592  | 1 | 531.5977 | 1591.771 | 3 | 27.36 | 0.0025  | SEPFKYSPLFFGK | Phospho (ST) | 0.0000001000000 | AJC_synth_375.1363.1363.3.dta |
| SXPFKXSPLXFR 5 0 3 1 1008 | 1 | 506.931  | 1517.771 | 3 | 26.62 | 0.0029  | SLPFKASPLFFGK | Phospho (ST) | 0.0000001000000 | AJC_synth_375.1491.1491.3.dta |
| GPSGVXSAQXLR 1 5 3 1 308  | 1 | 699.8378 | 1397.661 | 2 | 32.42 | 0.0031  | GPSGVDVSAQLEK | Phospho (ST) | 0.0000001000000 | AJC_synth_375.1626.1626.2.dta |
| GPSGVXSAQXLR 5 1 6 1 1034 | 1 | 669.8209 | 1337.627 | 2 | 30.62 | 0.0034  | GPSGLVSLAQLK  | Phospho (ST) | 0.0000001000000 | AJC_synth_375.987.987.2.dta   |
| GPSGVXSAQXLR 0 2 9 1 60   | 1 | 693.8207 | 1385.627 | 2 | 32.59 | 0.0035  | GPSGAVSVAQLYK | Phospho (ST) | 0.0000001000000 | AJC_synth_375.906.906.2.dta   |
| GPSGVXSAQXLR 4 4 6 1 894  | 1 | 612.7835 | 1223.553 | 2 | 28.22 | 0.0037  | GPSGVEVSAQLEK | Phospho (ST) | 0.0000001000000 | AJC_synth_375.719.719.2.dta   |
| SXPFKXSPLXFR 4 1 0 0 821  | 1 | 486.8958 | 1457.666 | 3 | 32.31 | 0.004   | SGPFKDSPLAFGR | Phospho (ST) | 0.0000001000000 | AJC_synth_375.1154.1154.3.dta |
| GPSGVXSAQXLR 3 8 9 1 780  | 1 | 478.2333 | 1431.678 | 3 | 31.19 | 0.004   | GPSGVSVAQLYK  | Phospho (ST) | 0.0000001000000 | AJC_synth_375.1448.1448.3.dta |
| SXPFKXSPLXFR 3 0 3 1 608  | 1 | 518.2581 | 1551.753 | 3 | 24.16 | 0.004   | SDPFKASPLFFGK | Phospho (ST) | 0.0000001000000 | AJC_synth_375.1546.1546.3.dta |
| SXPFKXSPLXFR 4 0 9 1 820  | 1 | 493.5742 | 1477.701 | 3 | 32.11 | 0.0043  | SGPFKASPLVFGK | Phospho (ST) | 0.0000001000000 | AJC_synth_375.1155.1155.3.dta |
| GPSGVXSAQXLR 8 0 7 0 1615 | 1 | 661.8267 | 1321.639 | 2 | 28.06 | 0.0043  | GPSGVVSAQQLTR | Phospho (ST) | 0.0000001000000 | AJC_synth_375.923.923.2.dta   |
| GPSGVXSAQXLR 1 2 1 0 243  | 1 | 470.8694 | 1409.587 | 3 | 25.55 | 0.0046  | GPSGVDVSAQLEK | Phospho (ST) | 0.0000001000000 | AJC_synth_375.783.783.3.dta   |
| GPSGVXSAQXLR 0 9 3 1 188  | 1 | 702.8317 | 1403.649 | 2 | 31.24 | 0.0051  | GPSGAVSVAQLEK | Phospho (ST) | 0.0000001000000 | AJC_synth_375.1428.1428.2.dta |
| GPSGVXSAQXLR 0 5 6 1 114  | 1 | 647.8248 | 1293.635 | 2 | 29.65 | 0.0052  | GPSGAVSVAQLEK | Phospho (ST) | 0.0000001000000 | AJC_synth_375.1086.1086.2.dta |
| GPSGVXSAQXLR 1 9 3 1 388  | 1 | 724.8269 | 1447.639 | 2 | 30.64 | 0.0053  | GPSGVDVSAQLEK | Phospho (ST) | 0.0000001000000 | AJC_synth_375.1370.1370.2.dta |
| SXPFKXSPLXFR 2 0 0 0 401  | 1 | 496.2413 | 1485.702 | 3 | 29.77 | 0.0055  | SEPFKESPLAFGR | Phospho (ST) | 0.0000001000000 | AJC_synth_375.1099.1099.3.dta |
| SXPFKXSPLXFR 5 8 1 0 1163 | 1 | 514.9292 | 1541.766 | 3 | 29.27 | 0.0056  | SLPFKVSPLDFGR | Phospho (ST) | 0.0000001000000 | AJC_synth_375.1490.1490.3.dta |
| SXPFKXSPLXFR 1 8 0 0 361  | 1 | 500.9125 | 1499.716 | 3 | 31.01 | 0.0058  | SDPFKVSPLAFGR | Phospho (ST) | 0.0000001000000 | AJC_synth_375.1338.1338.3.dta |
| GPSGVXSAQXLR 9 8 5 1 1972 | 1 | 466.9065 | 1397.698 | 3 | 29.33 | 0.0058  | GPSGVSVAQQLK  | Phospho (ST) | 0.0000001000000 | AJC_synth_375.1539.1539.3.dta |
| GPSGVXSAQXLR 2 5 0 0 501  | 1 | 682.8318 | 1363.649 | 2 | 27.02 | 0.0058  | GPSGVEVSAQLEK | Phospho (ST) | 0.0000001000000 | AJC_synth_375.1195.1195.2.dta |
| GPSGVXSAQXLR 6 9 3 1 1388 | 1 | 710.8287 | 1419.643 | 2 | 30.74 | 0.0059  | GPSGVSVAQLEK  | Phospho (ST) | 0.0000001000000 | AJC_synth_375.1339.1339.2.dta |
| GPSGVXSAQXLR 0 3 6 1 74   | 1 | 664.8157 | 1327.617 | 2 | 29.83 | 0.0061  | GPSGAVSVAQSK  | Phospho (ST) | 0.0000001000000 | AJC_synth_375.1122.1122.2.dta |
| GPSGVXSAQXLR 0 3 9 1 80   | 1 | 702.831  | 1403.647 | 2 | 30.34 | 0.0062  | GPSGAVSVAQLYK | Phospho (ST) | 0.0000001000000 | AJC_synth_375.1318.1318.2.dta |
| GPSGVXSAQXLR 6 0 0 0 1201 | 1 | 640.803  | 1279.591 | 2 | 28.23 | 0.0074  | GPSGVSVAQQLAR | Phospho (ST) | 0.0000001000000 | AJC_synth_375.858.858.2.dta   |
| SXPFKXSPLXFR 4 4 2 0 885  | 1 | 486.8979 | 1457.672 | 3 | 28.33 | 0.0079  | SGPFKSPLEFGK  | Phospho (ST) | 0.0000001000000 | AJC_synth_375.1045.1045.3.dta |
| GPSGVXSAQXLR 3 3 5 1 672  | 1 | 477.5763 | 1429.707 | 3 | 26.82 | 0.0079  | GPSGVSVAQQLK  | Phospho (ST) | 0.0000001000000 | AJC_synth_375.1883.1883.3.dta |
| SXPFKXSPLXFR 0 4 3 1 88   | 1 | 488.2429 | 1461.707 | 3 | 23.18 | 0.0079  | SAPFKKSPLEFGK | Phospho (ST) | 0.0000001000000 | AJC_synth_375.1202.1202.3.dta |
| GPSGVXSAQXLR 2 2 8 0 457  | 1 | 704.8293 | 1407.644 | 2 | 32.31 | 0.008   | GPSGVEVSAQLEK | Phospho (ST) | 0.0000001000000 | AJC_synth_375.918.918.2.dta   |
| SXPFKXSPLXFR 2 9 0 0 581  | 1 | 526.9167 | 1577.728 | 3 | 28.91 | 0.0084  | SEPFKYSPLAFGR | Phospho (ST) | 0.0000001000000 | AJC_synth_375.1231.1231.3.dta |
| SXPFKXSPLXFR 9 9 9 1 2000 | 1 | 559.5972 | 1675.77  | 3 | 23.28 | 0.0085  | SVPFKYSPLVFGK | Phospho (ST) | 0.0000001000000 | AJC_synth_375.1330.1330.3.dta |
| SXPFKXSPLXFR 0 0 9 1 20   | 1 | 498.2473 | 1491.72  | 3 | 28.2  | 0.0086  | SAPFKASPLVFGK | Phospho (ST) | 0.0000001000000 | AJC_synth_375.1106.1106.3.dta |
| GPSGVXSAQXLR 3 9 3 1 788  | 1 | 740.8485 | 1479.683 | 2 | 30.64 | 0.0086  | GPSGVSVAQQLK  | Phospho (ST) | 0.0000001000000 | AJC_synth_375.1706.1706.2.dta |
| GPSGVXSAQXLR 0 2 3 1 48   | 1 | 685.821  | 1369.627 | 2 | 29.55 | 0.0087  | GPSGAVSVAQLEK | Phospho (ST) | 0.0000001000000 | AJC_synth_375.1244.1244.2.dta |
| GPSGVXSAQXLR 4 0 0 0 801  | 1 | 625.7974 | 1249.58  | 2 | 27.95 | 0.0087  | GPSGVSVAQQLAR | Phospho (ST) | 0.0000001000000 | AJC_synth_375.880.880.2.dta   |
| SXPFKXSPLXFR 4 5 3 1 908  | 1 | 502.2596 | 1503.757 | 3 | 22.94 | 0.0091  | SGPFKLSPLFFGK | Phospho (ST) | 0.0000001000000 | AJC_synth_375.1486.1486.3.dta |
| SXPFKXSPLXFR 4 6 1 1 924  | 1 | 482.8927 | 1445.656 |   |       |         |               |              |                 |                               |

|                        |   |            |          |   |       |          |               |              |                   |                               |
|------------------------|---|------------|----------|---|-------|----------|---------------|--------------|-------------------|-------------------------------|
| GPSGXVSAQXLR 1941 390  | 1 | 679.8033   | 1357.592 | 2 | 22.81 | 0.024    | GPSGDVSAQGLK  | Phospho (ST) | 0.0000001000000.0 | AJC_synth_375.898.898.2.dta   |
| SXPFKXSLXFR 501 1102   | 1 | 495.603    | 1483.787 | 3 | 18.95 | 0.025    | SLPFKLSPLAFGK | Phospho (ST) | 0.0000001000000.0 | AJC_synth_375.1538.1538.3.dta |
| GPSGXVSAQXLR 5991 1200 | 1 | 731.8536   | 1461.693 | 2 | 23.98 | 0.025    | GPSGLVSAQYLYK | Phospho (ST) | 0.0000001000000.0 | AJC_synth_375.1378.1378.2.dta |
| GPSGXVSAQXLR 3900 0781 | 1 | 716.835    | 1431.656 | 2 | 23.52 | 0.025    | GPSGFVSAQALR  | Phospho (ST) | 0.0000001000000.0 | AJC_synth_375.1327.1327.2.dta |
| GPSGXVSAQXLR 8120 1625 | 1 | 697.8223   | 1393.63  | 2 | 27.15 | 0.026    | GPSGVSDAQALR  | Phospho (ST) | 0.0000001000000.0 | AJC_synth_375.894.894.2.dta   |
| GPSGXVSAQXLR 3581 718  | 1 | 461.5749   | 1381.703 | 3 | 20.88 | 0.029    | GPSGFVSAQALR  | Phospho (ST) | 0.0000001000000.0 | AJC_synth_375.1684.1684.3.dta |
| SXPFKXSLXFR 8031 1608  | 1 | 502.2599   | 1503.758 | 3 | 17.86 | 0.029    | SVPFKASPLFFGK | Phospho (ST) | 0.0000001000000.0 | AJC_synth_375.1355.1355.3.dta |
| SXPFKXSLXFR 0531 108   | 1 | 506.9305   | 1517.77  | 3 | 17.49 | 0.029    | SAPFKLSPLFFGK | Phospho (ST) | 0.0000001000000.0 | AJC_synth_375.1610.1610.3.dta |
| SXPFKXSLXFR 2510 503   | 1 | 524.9213   | 1571.742 | 3 | 24.77 | 0.03     | SEPFKLSPLDFGR | Phospho (ST) | 0.0000001000000.0 | AJC_synth_375.1451.1451.3.dta |
| GPSGXVSAQXLR 6991 1400 | 1 | 718.826    | 1435.637 | 2 | 26.09 | 0.031    | GPSGVSAQYLYK  | Phospho (ST) | 0.0000001000000.0 | AJC_synth_375.1026.1026.2.dta |
| GPSGXVSAQXLR 2971 1596 | 1 | 708.8254   | 1415.636 | 2 | 25.51 | 0.032    | GPSGEVSAQLTK  | Phospho (ST) | 0.0000001000000.0 | AJC_synth_375.980.980.2.dta   |
| SXPFKXSLXFR 6531 1308  | 1 | 512.2618   | 1533.764 | 3 | 21.28 | 0.032    | SVPFKASPLFFGK | Phospho (ST) | 0.0000001000000.0 | AJC_synth_375.1595.1595.3.dta |
| GPSGXVSAQXLR 6861 1374 | 1 | 648.8154   | 1295.616 | 2 | 22.43 | 0.033    | GPSGVSAQLSK   | Phospho (ST) | 0.0000001000000.0 | AJC_synth_375.882.882.2.dta   |
| GPSGXVSAQXLR 7961 1594 | 1 | 687.8127   | 1373.629 | 2 | 27.2  | 0.035    | GPSVTSAQLSK   | Phospho (ST) | 0.0000001000000.0 | AJC_synth_375.890.890.2.dta   |
| SXPFKXSLXFR 6811 1364  | 1 | 496.9004   | 1487.706 | 3 | 21.02 | 0.036    | SVPFKVSLDFGK  | Phospho (ST) | 0.0000001000000.0 | AJC_synth_375.1275.1275.3.dta |
| GPSGXVSAQXLR 5391 1080 | 1 | 723.8579   | 1445.701 | 2 | 21.29 | 0.037    | GPSGLVSAQYLYK | Phospho (ST) | 0.0000001000000.0 | AJC_synth_375.1686.1686.2.dta |
| SXPFKXSLXFR 0391 80    | 1 | 523.5902   | 1567.749 | 3 | 18.56 | 0.037    | SAPFKASPLFFGK | Phospho (ST) | 0.0000001000000.0 | AJC_synth_375.1459.1459.3.dta |
| SXPFKXSLXFR 8810 01763 | 1 | 510.2574   | 1527.75  | 3 | 20.26 | 0.041    | SVPFKVSLDFGR  | Phospho (ST) | 0.0000001000000.0 | AJC_synth_375.1371.1371.3.dta |
| GPSGXVSAQXLR 0441 0170 | 1 | 604.7896   | 1207.565 | 2 | 13.79 | 0.042    | GPSGAVSAQGLK  | Phospho (ST) | 0.0000001000000.0 | AJC_synth_375.738.738.2.dta   |
| GPSGXVSAQXLR 0381 099  | 1 | 684.8381   | 1367.662 | 2 | 19.41 | 0.048    | GPSGAVSAQLVR  | Phospho (ST) | 0.0000001000000.0 | AJC_synth_375.1403.1403.2.dta |
| SXPFKXSLXFR 4031 808   | 1 | 488.2422   | 1461.705 | 3 | 15.29 | 0.049    | SVPFKASPLFFGK | Phospho (ST) | 0.0000001000000.0 | AJC_synth_375.1319.1319.3.dta |
| SXPFKXSLXFR 2921 1586  | 1 | 536.9159   | 1607.726 | 3 | 15.87 | 0.05     | SEPFKVSPLFFGK | Phospho (ST) | 0.0000001000000.0 | AJC_synth_375.1221.1221.3.dta |
| SXPFKXSLXFR 9191 1840  | 1 | 545.584    | 1627.73  | 3 | 36.33 | 0.00023  | SVPFKASPLFFGK | Phospho (ST) | 0.0000001000000.0 | Synth_pep_40V.1001.1001.3.dta |
| SXPFKXSLXFR 7091 1420  | 1 | 508.2488   | 1521.725 | 3 | 34.16 | 0.0023   | SVPFKASPLFFGK | Phospho (ST) | 0.0000001000000.0 | Synth_pep_40V.1002.1002.3.dta |
| SXPFKXSLXFR 5421 1086  | 1 | 496.2489   | 1485.725 | 3 | 47.34 | 0.00013  | SLPFKASPLFFGK | Phospho (ST) | 0.0000001000000.0 | Synth_pep_40V.1008.1008.3.dta |
| SXPFKXSLXFR 0991 200   | 1 | 528.9205   | 1583.74  | 3 | 66.42 | 9.20E-07 | SAPFKASPLFFGK | Phospho (ST) | 0.0000001000000.0 | Synth_pep_40V.1009.1009.3.dta |
| SXPFKXSLXFR 7991 1600  | 1 | 538.9243   | 1613.751 | 3 | 58.01 | 1.70E-06 | SVPFKASPLFFGK | Phospho (ST) | 0.0000001000000.0 | Synth_pep_40V.1015.1015.3.dta |
| SXPFKXSLXFR 6991 1400  | 1 | 534.2524   | 1599.736 | 3 | 68.72 | 3.40E-07 | SVPFKASPLFFGK | Phospho (ST) | 0.0000001000000.0 | Synth_pep_40V.1023.1023.3.dta |
| SXPFKXSLXFR 2991 1600  | 1 | 548.2559   | 1641.746 | 3 | 55.04 | 3.10E-06 | SEPFKVSPLFFGK | Phospho (ST) | 0.0000001000000.0 | Synth_pep_40V.1024.1024.3.dta |
| SXPFKXSLXFR 7981 1598  | 1 | 517.5934   | 1549.759 | 3 | 43.54 | 0.00019  | SVPFKASPLFFGK | Phospho (ST) | 0.0000001000000.0 | Synth_pep_40V.1026.1026.3.dta |
| SXPFKXSLXFR 5291 1060  | 1 | 531.5966   | 1591.768 | 3 | 39.2  | 0.00014  | SLPFKESPLFFGK | Phospho (ST) | 0.0000001000000.0 | Synth_pep_40V.1029.1029.3.dta |
| SXPFKXSLXFR 4031 808   | 1 | 488.2421   | 1461.705 | 3 | 62.02 | 1.00E-06 | SEPFKASPLFFGK | Phospho (ST) | 0.0000001000000.0 | Synth_pep_40V.1032.1032.3.dta |
| SXPFKXSLXFR 6031 1208  | 1 | 498.245    | 1491.713 | 3 | 45.78 | 0.00017  | SVPFKASPLFFGK | Phospho (ST) | 0.0000001000000.0 | Synth_pep_40V.1034.1034.3.dta |
| SXPFKXSLXFR 2910 583   | 1 | 541.5792   | 1621.716 | 3 | 34.71 | 0.00011  | SEPFKVSPLDFGR | Phospho (ST) | 0.0000001000000.0 | Synth_pep_40V.1040.1040.3.dta |
| SXPFKXSLXFR 2990 599   | 1 | 557.5914   | 1669.753 | 3 | 50.8  | 8.70E-06 | SEPFKVSPLFFGK | Phospho (ST) | 0.0000001000000.0 | Synth_pep_40V.1041.1041.3.dta |
| SXPFKXSLXFR 5011 1004  | 1 | 743.8712   | 1485.728 | 2 | 28.73 | 0.0096   | SLPFKASPLDFGK | Phospho (ST) | 0.0000001000000.0 | Synth_pep_40V.1050.1050.2.dta |
| SXPFKXSLXFR 2031 408   | 1 | 512.2476   | 1533.721 | 3 | 25.81 | 0.011    | SEPFKASPLFFGK | Phospho (ST) | 0.0000001000000.0 | Synth_pep_40V.1055.1055.3.dta |
| SXPFKXSLXFR 4881 978   | 1 | 481.5864   | 1441.737 | 3 | 54.02 | 1.40E-05 | SGPFKVSPLVFGK | Phospho (ST) | 0.0000001000000.0 | Synth_pep_40V.1058.1058.3.dta |
| SXPFKXSLXFR 2810 563   | 1 | 520.2477   | 1557.721 | 3 | 46.71 | 0.00012  | SEPFKVSPLDFGR | Phospho (ST) | 0.0000001000000.0 | Synth_pep_40V.1064.1064.3.dta |
| SXPFKXSLXFR 9991 2000  | 1 | 559.5964   | 1675.767 | 3 | 59.34 | 1.20E-06 | SVPFKASPLFFGK | Phospho (ST) | 0.0000001000000.0 | Synth_pep_40V.1067.1067.3.dta |
| SXPFKXSLXFR 2890 579   | 1 | 536.2603   | 1605.759 | 3 | 48.73 | 6.40E-05 | SEPFKVSPLVFGK | Phospho (ST) | 0.0000001000000.0 | Synth_pep_40V.1068.1068.3.dta |
| SXPFKXSLXFR 8981 1798  | 1 | 516.9352   | 1547.784 | 3 | 26.06 | 0.0062   | SVPFKVSPLVFGK | Phospho (ST) | 0.0000001000000.0 | Synth_pep_40V.1069.1069.3.dta |
| SXPFKXSLXFR 1991 400   | 1 | 543.5837   | 1627.729 | 3 | 51.35 | 7.30E-06 | SVPFKVSPLVFGK | Phospho (ST) | 0.0000001000000.0 | Synth_pep_40V.1071.1071.3.dta |
| SXPFKXSLXFR 4541 910   | 1 | 472.2423   | 1413.705 | 3 | 50.75 | 3.50E-05 | SGPFKLSPLFFGK | Phospho (ST) | 0.0000001000000.0 | Synth_pep_40V.1076.1076.3.dta |
| SXPFKXSLXFR 6801 1362  | 1 | 482.2448   | 1443.713 | 3 | 42.56 | 0.00035  | SVPFKASPLAFGK | Phospho (ST) | 0.0000001000000.0 | Synth_pep_40V.1080.1080.3.dta |
| SXPFKXSLXFR 6051 1212  | 1 | 729.8721   | 1457.73  | 2 | 22.89 | 0.03     | SVPFKASPLFFGK | Phospho (ST) | 0.0000001000000.0 | Synth_pep_40V.1081.1081.2.dta |
| SXPFKXSLXFR 4521 906   | 1 | 496.2498   | 1485.728 | 3 | 75.21 | 2.20E-07 | SGPFKLSPLFFGK | Phospho (ST) | 0.0000001000000.0 | Synth_pep_40V.1082.1082.3.dta |
| SXPFKXSLXFR 3691 740   | 1 | 528.9207   | 1583.74  | 3 | 32.43 | 0.0023   | SVPFKVSPLVFGK | Phospho (ST) | 0.0000001000000.0 | Synth_pep_40V.1084.1084.3.dta |
| SXPFKXSLXFR 6521 1306  | 1 | 506.2531   | 1515.737 | 3 | 69.5  | 4.70E-07 | SVPFKLSPLFFGK | Phospho (ST) | 0.0000001000000.0 | Synth_pep_40V.1087.1087.3.dta |
| SXPFKXSLXFR 1990 399   | 1 | 552.9186   | 1655.734 | 3 | 17.13 | 0.036    | SVPFKVSPLVFGK | Phospho (ST) | 0.0000001000000.0 | Synth_pep_40V.1090.1090.3.dta |
| SXPFKXSLXFR 1810 363   | 1 | 515.5755   | 1543.705 | 3 | 61.33 | 4.60E-06 | SVPFKVSPLDFGR | Phospho (ST) | 0.0000001000000.0 | Synth_pep_40V.1096.1096.3.dta |
| SXPFKXSLXFR 3631 728   | 1 | 523.589    | 1567.745 | 3 | 44.14 | 0.0001   | SVPFKASPLFFGK | Phospho (ST) | 0.0000001000000.0 | Synth_pep_40V.1103.1103.3.dta |
| SXPFKXSLXFR 7931 1588  | 1 | 533.5923   | 1597.755 | 3 | 56.11 | 4.90E-06 | SVPFKASPLFFGK | Phospho (ST) | 0.0000001000000.0 | Synth_pep_40V.1106.1106.3.dta |
| SXPFKXSLXFR 4591 920   | 1 | 507.5898   | 1519.748 | 3 | 64.39 | 1.90E-06 | SGPFKLSPLVFGK | Phospho (ST) | 0.0000001000000.0 | Synth_pep_40V.1111.1111.3.dta |
| SXPFKXSLXFR 4301 862   | 1 | 488.2422   | 1461.705 | 3 | 70.2  | 1.60E-07 | SGPFKVSPLAFGK | Phospho (ST) | 0.0000001000000.0 | Synth_pep_40V.1112.1112.3.dta |
| SXPFKXSLXFR 5991 1200  | 1 | 542.9374   | 1625.791 | 3 | 58.9  | 1.30E-06 | SVPFKVSPLVFGK | Phospho (ST) | 0.0000001000000.0 | Synth_pep_40V.1113.1113.3.dta |
| SXPFKXSLXFR 6511 1304  | 1 | 501.5808   | 1501.721 | 3 | 56.76 | 9.20E-06 | SVPFKLSPLDFGK | Phospho (ST) | 0.0000001000000.0 | Synth_pep_40V.1114.1114.3.dta |
| SXPFKXSLXFR 4931 988   | 1 | 518.9174   | 1553.73  | 3 | 31.76 | 0.0026   | SGPFKVSPLFFGK | Phospho (ST) | 0.0000001000000.0 | Synth_pep_40V.1115.1115.3.dta |
| SXPFKXSLXFR 7591 1520  | 1 | 522.2649   | 1563.773 | 3 | 54.02 | 8.90E-06 | SVPFKVSPLVFGK | Phospho (ST) | 0.0000001000000.0 | Synth_pep_40V.1120.1120.3.dta |
| SXPFKXSLXFR 4300 861   | 1 | 497.5773   | 1489.71  | 3 | 48.34 | 3.70E-05 | SGPFKVSPLAFGR | Phospho (ST) | 0.0000001000000.0 | Synth_pep_40V.1128.1128.3.dta |
| GPSGXVSAQXLR 3981 798  | 1 | 478.2339   | 1431.68  | 3 | 50.26 | 4.90E-05 | GPSGFVSAQVLK  | Phospho (ST) | 0.0000001000000.0 | Synth_pep_40V.1135.1135.3.dta |
| SXPFKXSLXFR 5910 1183  | 1 | 536.2596   | 1605.757 | 3 | 32.85 | 0.0026   | SLPFKVSPLDFGR | Phospho (ST) | 0.0000001000000.0 | Synth_pep_40V.1137.1137.3.dta |
| GPSGXVSAQXLR 5361 1074 | 1 | 457.5616   | 1369.663 | 3 | 28.07 | 0.0099   | GPSGLVSAQLSK  | Phospho (ST) | 0.0000001000000.0 | Synth_pep_40V.1140.1140.3.dta |
| SXPFKXSLXFR 2590 519   | 1 | 540.9319   | 1619.774 | 3 | 42.73 | 0.00018  | SEPFKLSPLVFGK | Phospho (ST) | 0.0000001000000.0 | Synth_pep_40V.1143.1143.3.dta |
| SXPFKXSLXFR 5811 1164  | 1 | 757.8857   | 1513.757 | 2 | 25.38 | 0.016    | SLPFKVSPLDFGR | Phospho (ST) | 0.0000001000000.0 | Synth_pep_40V.1145.1145.2.dta |
| SXPFKXSLXFR 5891 1180  | 1 | 521.6054   | 1561.794 | 3 | 70.76 | 1.60E-07 | SLPFKVSPLVFGK | Phospho (ST) | 0.0000001000000.0 | Synth_pep_40V.1151.1151.3.dta |
| SXPFKXSLXFR 1500 301   | 1 | 505.5831   | 1513.728 | 3 | 41.59 | 0.0006   | SVPFKLSPLAFGR | Phospho (ST) | 0.0000001000000.0 | Synth_pep_40V.1152.1152.3.dta |
| SXPFKXSLXFR 9931 1398  | 1 | 554.2646   | 1659.772 | 3 | 40.42 | 0.00022  | SVPFKVSPLFFGK | Phospho (ST) | 0.0000001000000.0 | Synth_pep_40V.1153.1153.3.dta |
| SXPFKXSLXFR 8591 1720  | 1 | 781.9058   | 1561.797 | 2 | 19.09 | 0.02     | SVPFKVSPLVFGK | Phospho (ST) | 0.0000001000000.0 | Synth_pep_40V.1154.1154.2.dta |
| SXPFKXSLXFR 5810 1163  | 1 | 514.9287   | 1541.764 | 3 | 67.64 | 8.20E-07 | SLPFKVSPLDFGR | Phospho (ST) | 0.0000001000000.0 | Synth_pep_40V.1159.1159.3.dta |
| SXPFKXSLXFR 3131 628   | 1 | 532.9202   | 1595.739 | 3 | 22.52 | 0.0092   | SVPFKASPLFFGK | Phospho (ST) | 0.0000001000000.0 | Synth_pep_40V.1162.1162.3.dta |
| SXPFKXSLXFR 5881 1178  | 1 | 500.2734   | 1497.799 | 3 | 67.06 | 5.30E-07 | SLPFKVSPLVFGK | Phospho (ST) | 0.0000001000000.0 | Synth_pep_40V.1167.1167.3.dta |
| SXPFKXSLXFR 1510 303   | 1 | 520.2479   | 1557.722 | 3 | 58.68 | 7.70E-06 | SVPFKLSPLDFGR | Phospho (ST) | 0.0000001000000.0 | Synth_pep_40V.1175.1175.3.dta |
| SXPFKXSLXFR 2390 479   | 1 | 552.2595   | 1653.757 | 3 | 54.13 | 8.70E-06 | SEPFKVSPLVFGK | Phospho (ST) | 0.0000001000000.0 | Synth_pep_40V.1177.1177.3.dta |
| SXPFKXSLXFR 1300 261   | 1 | 516.9124   | 1547.715 | 3 | 54.86 | 1.20E-05 | SVPFKVSPLAFGR | Phospho (ST) | 0.0000001000000.0 | Synth_pep_40V.1183.1183.3.dta |
| SXPFKXSLXFR 3031 608   | 1 | 518.2578   | 1551.752 | 3 | 43.45 | 5.40E-05 | SVPFKASPLFFGK | Phospho (ST) | 0.0000001000000.0 | Synth_pep_40V.1192.1192.3.dta |
| GPSGXVSAQXLR 9851 1972 | 1 | 466.9053   | 1397.694 | 3 | 63.48 | 2.20E-06 | GPSGVSAQVLK   | Phospho (ST) | 0.0000001000000.0 | Synth_pep_40V.1196.1196.3.dta |
| SXPFKXSLXFR 5500 1101  | 1 | 504.9366   | 1511.788 | 3 | 55.57 | 6.70E-06 | SLPFKLSPLAFGR | Phospho (ST) | 0.0000001000000.0 | Synth_pep_40V.1199.1199.3.dta |
| SXPFKXSLXFR 3810 763   | 1 | 526.2558   | 1575.746 | 3 | 34.32 | 0.0011   | SVPFKVSPLDFGR | Phospho (ST) | 0.0000001000000.0 | Synth_pep_40V.1200.1200.3.dta |
| SXPFKXSLXFR 3890 779   | 1 | 542.2668</ |          |   |       |          |               |              |                   |                               |

|               |         |      |   |          |          |   |       |          |               |              |                   |                                |
|---------------|---------|------|---|----------|----------|---|-------|----------|---------------|--------------|-------------------|--------------------------------|
| SXPFKXSPLXFR  | 5 3 8 1 | 1078 | 1 | 516.2744 | 1545.801 | 3 | 20.56 | 0.018    | SLPFKSPFLVFGK | Phospho (ST) | 0.0000001000000.0 | Synth_pep_40V.1306.1306.3.dta  |
| SXPFKXSPLXFR  | 5 3 3 1 | 1108 | 1 | 520.9454 | 1559.815 | 3 | 60.43 | 9.10E-07 | SLPFKSPFLVFGK | Phospho (ST) | 0.0000001000000.0 | Synth_pep_40V.1311.1311.3.dta  |
| SXPFKXSPLXFR  | 5 3 3 1 | 1068 | 1 | 532.2732 | 1593.798 | 3 | 56.71 | 3.20E-06 | SLPFKSPFLVFGK | Phospho (ST) | 0.0000001000000.0 | Synth_pep_40V.1319.1319.3.dta  |
| GPSGVXSQAQLXR | 9 5 3 1 | 1908 | 1 | 482.905  | 1445.693 | 3 | 51.05 | 4.0E-05  | GPSGVLSAQLFK  | Phospho (ST) | 0.0000001000000.0 | Synth_pep_40V.1328.1328.3.dta  |
| SXPFKXSPLXFR  | 3 5 3 1 | 1708 | 1 | 532.2743 | 1593.801 | 3 | 35.75 | 0.00044  | SFPFKSPLVFGK  | Phospho (ST) | 0.0000001000000.0 | Synth_pep_40V.1367.1367.3.dta  |
| GPSGVXSQAQLXR | 6 9 3 0 | 1387 | 1 | 483.5583 | 1447.653 | 3 | 36.41 | 0.00014  | GPSGVSYAQLFR  | Phospho (ST) | 0.0000001000000.0 | Synth_pep_40V.1368.1368.3.dta  |
| GPSGVXSQAQLXR | 5 3 5 0 | 1071 | 1 | 475.5807 | 1423.72  | 3 | 30.98 | 0.00018  | GPSGLVSAQLLR  | Phospho (ST) | 0.0000001000000.0 | Synth_pep_40V.1394.1394.3.dta  |
| GPSGVXSQAQLXR | 9 7 5 0 | 1951 | 1 | 476.9019 | 1427.684 | 3 | 38.5  | 0.00042  | GPSGVSTAQLLR  | Phospho (ST) | 0.0000001000000.0 | Synth_pep_40V.1399.1399.3.dta  |
| GPSGVXSQAQLXR | 3 3 5 0 | 1671 | 1 | 486.9083 | 1457.703 | 3 | 24.02 | 0.00085  | GPSGVSAQLLR   | Phospho (ST) | 0.0000001000000.0 | Synth_pep_40V.1404.1404.3.dta  |
| GPSGVXSQAQLXR | 7 9 3 0 | 1587 | 1 | 488.23   | 1461.668 | 3 | 25.88 | 0.014    | GPSGVSYAQLFR  | Phospho (ST) | 0.0000001000000.0 | Synth_pep_40V.1455.1455.3.dta  |
| GPSGVXSQAQLXR | 6 1 6 0 | 1233 | 1 | 670.7932 | 1339.572 | 2 | 72.17 | 1.30E-07 | GPSGVSDAQLSR  | Phospho (ST) | 0.0000001000000.0 | Synth_pep_40V.720.720.2.dta    |
| GPSGVXSQAQLXR | 0 2 6 0 | 53   | 1 | 669.8053 | 1337.596 | 2 | 47.9  | 7.50E-05 | GPSGVAESAQLSR | Phospho (ST) | 0.0000001000000.0 | Synth_pep_40V.744.744.2.dta    |
| GPSGVXSQAQLXR | 1 0 1 0 | 203  | 1 | 451.5323 | 1351.575 | 3 | 56.73 | 7.90E-06 | GPSGDVSAQLDR  | Phospho (ST) | 0.0000001000000.0 | Synth_pep_40V.746.746.3.dta    |
| GPSGVXSQAQLXR | 1 2 1 0 | 243  | 1 | 470.8673 | 1409.58  | 3 | 64.01 | 1.20E-06 | GPSGDVSAQLDR  | Phospho (ST) | 0.0000001000000.0 | Synth_pep_40V.749.749.3.dta    |
| GPSGVXSQAQLXR | 1 2 2 0 | 245  | 1 | 475.5399 | 1423.598 | 3 | 61.85 | 3.50E-06 | GPSGDVSAQLDR  | Phospho (ST) | 0.0000001000000.0 | Synth_pep_40V.751.751.3.dta    |
| GPSGVXSQAQLXR | 9 1 1 0 | 1823 | 1 | 482.2072 | 1443.6   | 3 | 30.61 | 0.00015  | GPSGVSDAQLDR  | Phospho (ST) | 0.0000001000000.0 | Synth_pep_40V.817.817.3.dta    |
| GPSGVXSQAQLXR | 1 2 8 0 | 257  | 1 | 465.5483 | 1393.623 | 3 | 30.88 | 0.00039  | GPSGDVSAQLVR  | Phospho (ST) | 0.0000001000000.0 | Synth_pep_40V.829.829.3.dta    |
| GPSGVXSQAQLXR | 1 2 9 0 | 259  | 1 | 486.8802 | 1457.619 | 3 | 33.17 | 0.00021  | GPSGDVSAQLVR  | Phospho (ST) | 0.0000001000000.0 | Synth_pep_40V.832.832.3.dta    |
| SXPFKXSPLXFR  | 4 4 4 1 | 1820 | 1 | 453.5547 | 1357.642 | 3 | 52.95 | 2.50E-05 | SGPFKSPFLVFGK | Phospho (ST) | 0.0000001000000.0 | Synth_pep_40V.865.865.3.dta    |
| SXPFKXSPLXFR  | 6 6 0 1 | 1392 | 1 | 478.2335 | 1431.679 | 3 | 51.63 | 3.60E-05 | SGPFKSPFLVFGK | Phospho (ST) | 0.0000001000000.0 | Synth_pep_40V.867.867.3.dta    |
| SXPFKXSPLXFR  | 4 6 2 1 | 1926 | 1 | 487.5655 | 1459.675 | 3 | 67.66 | 9.30E-07 | SGPFKSPFLVFGK | Phospho (ST) | 0.0000001000000.0 | Synth_pep_40V.879.879.3.dta    |
| SXPFKXSPLXFR  | 4 2 4 1 | 1486 | 1 | 501.5689 | 1501.685 | 3 | 69.25 | 6.50E-07 | SGPFKSPFLVFGK | Phospho (ST) | 0.0000001000000.0 | Synth_pep_40V.880.880.3.dta    |
| SXPFKXSPLXFR  | 4 2 0 1 | 1842 | 1 | 482.2337 | 1443.679 | 3 | 65.33 | 1.70E-06 | SGPFKSPFLVFGK | Phospho (ST) | 0.0000001000000.0 | Synth_pep_40V.888.888.3.dta    |
| SXPFKXSPLXFR  | 4 4 0 0 | 1881 | 1 | 467.5621 | 1399.665 | 3 | 63.39 | 4.10E-06 | SGPFKSPFLVFGK | Phospho (ST) | 0.0000001000000.0 | Synth_pep_40V.889.889.3.dta    |
| SXPFKXSPLXFR  | 4 0 4 0 | 1810 | 1 | 686.8363 | 1371.658 | 2 | 20.31 | 0.035    | SGPFKSPFLVFGK | Phospho (ST) | 0.0000001000000.0 | Synth_pep_40V.893.893.2.dta    |
| SXPFKXSPLXFR  | 0 6 9 1 | 1140 | 1 | 503.5771 | 1507.71  | 3 | 72.34 | 5.20E-07 | SAPFKSPLVFGK  | Phospho (ST) | 0.0000001000000.0 | Synth_pep_40V.897.897.3.dta    |
| SXPFKXSPLXFR  | 0 4 1 0 | 83   | 1 | 486.895  | 1457.663 | 3 | 22.02 | 0.038    | SAPFKSPLVFGK  | Phospho (ST) | 0.0000001000000.0 | Synth_pep_40V.905.905.3.dta    |
| SXPFKXSPLXFR  | 4 6 9 1 | 1940 | 1 | 498.9064 | 1493.697 | 3 | 55.5  | 2.50E-05 | SGPFKSPFLVFGK | Phospho (ST) | 0.0000001000000.0 | Synth_pep_40V.906.906.3.dta    |
| SXPFKXSPLXFR  | 2 6 9 1 | 1540 | 1 | 522.9119 | 1565.714 | 3 | 51.64 | 1.70E-05 | SEPFKSPFLVFGK | Phospho (ST) | 0.0000001000000.0 | Synth_pep_40V.911.911.3.dta    |
| SXPFKXSPLXFR  | 2 2 0 0 | 441  | 1 | 515.5754 | 1543.705 | 3 | 46.93 | 0.00013  | SEPFKSPFLVFGK | Phospho (ST) | 0.0000001000000.0 | Synth_pep_40V.912.912.3.dta    |
| SXPFKXSPLXFR  | 2 4 9 1 | 1500 | 1 | 512.9084 | 1535.704 | 3 | 37.43 | 0.00015  | SEPFKSPFLVFGK | Phospho (ST) | 0.0000001000000.0 | Synth_pep_40V.916.916.3.dta    |
| SXPFKXSPLXFR  | 2 0 0 0 | 401  | 1 | 496.2407 | 1485.7   | 3 | 59.65 | 5.60E-06 | SEPFKSPFLVFGK | Phospho (ST) | 0.0000001000000.0 | Synth_pep_40V.927.927.3.dta    |
| SXPFKXSPLXFR  | 4 6 9 0 | 1939 | 1 | 508.2392 | 1521.696 | 3 | 34.68 | 0.00032  | SGPFKSPFLVFGK | Phospho (ST) | 0.0000001000000.0 | Synth_pep_40V.928.928.3.dta    |
| SXPFKXSPLXFR  | 2 2 9 1 | 1460 | 1 | 536.9156 | 1607.725 | 3 | 55.76 | 5.20E-06 | SEPFKSPFLVFGK | Phospho (ST) | 0.0000001000000.0 | Synth_pep_40V.929.929.3.dta    |
| SXPFKXSPLXFR  | 0 0 9 1 | 120  | 1 | 498.2455 | 1491.715 | 3 | 65.59 | 1.80E-06 | SAPFKASPLVFGK | Phospho (ST) | 0.0000001000000.0 | Synth_pep_40V.935.935.3.dta    |
| SXPFKXSPLXFR  | 2 2 1 0 | 443  | 1 | 530.239  | 1587.695 | 3 | 50.98 | 2.00E-05 | SEPFKSPFLVFGK | Phospho (ST) | 0.0000001000000.0 | Synth_pep_40V.938.938.3.dta    |
| SXPFKXSPLXFR  | 4 2 9 0 | 859  | 1 | 522.2438 | 1563.71  | 3 | 54.07 | 2.30E-05 | SGPFKSPFLVFGK | Phospho (ST) | 0.0000001000000.0 | Synth_pep_40V.944.944.3.dta    |
| SXPFKXSPLXFR  | 6 0 9 1 | 1220 | 1 | 754.8616 | 1507.709 | 2 | 26.04 | 0.022    | SAPFKASPLVFGK | Phospho (ST) | 0.0000001000000.0 | Synth_pep_40V.945.945.2.dta    |
| SXPFKXSPLXFR  | 2 0 9 1 | 1420 | 1 | 517.5825 | 1549.726 | 3 | 36.73 | 0.00017  | SEPFKSPFLVFGK | Phospho (ST) | 0.0000001000000.0 | Synth_pep_40V.951.951.3.dta    |
| SXPFKXSPLXFR  | 2 7 9 1 | 1560 | 1 | 527.5838 | 1579.73  | 3 | 47.91 | 1.90E-05 | SEPFKSPFLVFGK | Phospho (ST) | 0.0000001000000.0 | Synth_pep_40V.952.952.3.dta    |
| SXPFKXSPLXFR  | 2 0 1 0 | 403  | 1 | 510.9039 | 1529.69  | 3 | 58.03 | 1.30E-05 | SEPFKSPFLVFGK | Phospho (ST) | 0.0000001000000.0 | Synth_pep_40V.960.960.3.dta    |
| SXPFKXSPLXFR  | 4 7 1 0 | 1943 | 1 | 496.8991 | 1487.675 | 3 | 35.27 | 0.00024  | SGPFKSPFLVFGK | Phospho (ST) | 0.0000001000000.0 | Synth_pep_40V.961.961.3.dta    |
| SXPFKXSPLXFR  | 2 0 9 0 | 419  | 1 | 526.9156 | 1577.725 | 3 | 49.3  | 7.60E-05 | SEPFKASPLVFGK | Phospho (ST) | 0.0000001000000.0 | Synth_pep_40V.969.969.3.dta    |
| SXPFKXSPLXFR  | 6 9 0 1 | 1382 | 1 | 503.5775 | 1507.711 | 3 | 60.48 | 8.00E-06 | SEPFKASPLVFGK | Phospho (ST) | 0.0000001000000.0 | Synth_pep_40V.984.984.3.dta    |
| SXPFKXSPLXFR  | 4 9 2 1 | 1986 | 1 | 512.9089 | 1535.705 | 3 | 45.82 | 0.00021  | SGPFKSPFLVFGK | Phospho (ST) | 0.0000001000000.0 | Synth_pep_40V.991.991.3.dta    |
| SXPFKXSPLXFR  | 8 0 1 0 | 1603 | 1 | 500.9127 | 1499.716 | 3 | 49.39 | 7.40E-05 | SEPFKSPFLVFGK | Phospho (ST) | 0.0000001000000.0 | Synth_pep_40V.993.993.3.dta    |
| SXPFKXSPLXFR  | 6 9 2 1 | 1386 | 1 | 522.9122 | 1565.715 | 3 | 33.97 | 0.0001   | SGPFKSPFLVFGK | Phospho (ST) | 0.0000001000000.0 | Synth_pep_40V.994.994.3.dta    |
| SXPFKXSPLXFR  | 4 8 0 1 | 1962 | 1 | 472.2424 | 1413.706 | 3 | 83.96 | 1.70E-08 | SGPFKSPFLVFGK | Phospho (ST) | 0.0000001000000.0 | Synth_pep_40V.996.996.3.dta    |
| SXPFKXSPLXFR  | 5 1 0 1 | 1022 | 1 | 496.2498 | 1485.728 | 3 | 58.4  | 1.00E-05 | SLPFKDSPLVFGK | Phospho (ST) | 0.0000001000000.0 | Synth_pep_425V.1002.1002.3.dta |
| SXPFKXSPLXFR  | 2 9 2 1 | 1586 | 1 | 536.9156 | 1607.725 | 3 | 46.73 | 4.10E-05 | SEPFKSPFLVFGK | Phospho (ST) | 0.0000001000000.0 | Synth_pep_425V.1004.1004.3.dta |
| SXPFKXSPLXFR  | 4 0 5 1 | 1812 | 1 | 476.9152 | 1427.724 | 3 | 44.62 | 8.30E-05 | SGPFKASPLVFGK | Phospho (ST) | 0.0000001000000.0 | Synth_pep_425V.1009.1009.3.dta |
| SXPFKXSPLXFR  | 1 0 1 0 | 203  | 1 | 506.2318 | 1515.674 | 3 | 52.31 | 4.20E-05 | SDPFKASPLVFGK | Phospho (ST) | 0.0000001000000.0 | Synth_pep_425V.1010.1010.3.dta |
| SXPFKXSPLXFR  | 4 5 1 1 | 1904 | 1 | 736.8616 | 1471.709 | 2 | 22.72 | 0.036    | SGPFKSPFLVFGK | Phospho (ST) | 0.0000001000000.0 | Synth_pep_425V.1011.1011.2.dta |
| SXPFKXSPLXFR  | 6 8 2 1 | 1366 | 1 | 501.5807 | 1501.72  | 3 | 30.79 | 0.00036  | SEPFKSPFLVFGK | Phospho (ST) | 0.0000001000000.0 | Synth_pep_425V.1018.1018.3.dta |
| SXPFKXSPLXFR  | 4 2 9 0 | 859  | 1 | 522.2436 | 1563.709 | 3 | 36.75 | 0.00012  | SGPFKSPFLVFGK | Phospho (ST) | 0.0000001000000.0 | Synth_pep_425V.1019.1019.3.dta |
| SXPFKXSPLXFR  | 0 9 9 1 | 1200 | 1 | 792.8779 | 1583.741 | 2 | 21.25 | 0.03     | SAPFKASPLVFGK | Phospho (ST) | 0.0000001000000.0 | Synth_pep_425V.1020.1020.2.dta |
| SXPFKXSPLXFR  | 0 5 0 1 | 102  | 1 | 721.8755 | 1441.736 | 2 | 24.48 | 0.012    | SAPFKASPLVFGK | Phospho (ST) | 0.0000001000000.0 | Synth_pep_425V.1021.1021.2.dta |
| GPSGVXSQAQLXR | 9 6 5 1 | 1932 | 1 | 462.8932 | 1385.658 | 3 | 34.96 | 0.00036  | GPSGVSSAQLLK  | Phospho (ST) | 0.0000001000000.0 | Synth_pep_425V.1022.1022.3.dta |
| SXPFKXSPLXFR  | 5 4 0 1 | 1083 | 1 | 500.9117 | 1499.713 | 3 | 36.61 | 0.00017  | SLPFKDSPLVFGK | Phospho (ST) | 0.0000001000000.0 | Synth_pep_425V.1025.1025.3.dta |
| SXPFKXSPLXFR  | 5 2 9 1 | 1060 | 1 | 531.5971 | 1591.77  | 3 | 54.57 | 4.70E-06 | SLPFKESPLVFGK | Phospho (ST) | 0.0000001000000.0 | Synth_pep_425V.1028.1028.3.dta |
| SXPFKXSPLXFR  | 7 9 9 1 | 1600 | 1 | 807.8821 | 1613.75  | 2 | 34.32 | 0.00037  | STPFKSPFLVFGK | Phospho (ST) | 0.0000001000000.0 | Synth_pep_425V.1029.1029.2.dta |
| SXPFKXSPLXFR  | 0 1 8 1 | 38   | 1 | 491.5778 | 1471.712 | 3 | 35.76 | 0.00018  | SAPFKASPLVFGK | Phospho (ST) | 0.0000001000000.0 | Synth_pep_425V.1033.1033.3.dta |
| SXPFKXSPLXFR  | 2 8 0 0 | 561  | 1 | 505.5841 | 1513.731 | 3 | 53    | 4.20E-05 | SEPFKSPFLVFGK | Phospho (ST) | 0.0000001000000.0 | Synth_pep_425V.1034.1034.3.dta |
| SXPFKXSPLXFR  | 2 9 8 1 | 1598 | 1 | 526.925  | 1577.753 | 3 | 39.07 | 0.00037  | SEPFKSPFLVFGK | Phospho (ST) | 0.0000001000000.0 | Synth_pep_425V.1035.1035.3.dta |
| SXPFKXSPLXFR  | 6 9 9 1 | 1400 | 1 | 534.2526 | 1599.736 | 3 | 35.17 | 0.00078  | SEPFKSPFLVFGK | Phospho (ST) | 0.0000001000000.0 | Synth_pep_425V.1036.1036.3.dta |
| GPSGVXSQAQLXR | 9 9 8 1 | 1998 | 1 | 483.566  | 1447.676 | 3 | 35.62 | 0.0003   | GPSGVSYAQLVK  | Phospho (ST) | 0.0000001000000.0 | Synth_pep_425V.1038.1038.3.dta |
| SXPFKXSPLXFR  | 4 8 9 1 | 1980 | 1 | 502.9182 | 1505.733 | 3 | 52.99 | 2.80E-05 | SGPFKSPFLVFGK | Phospho (ST) | 0.0000001000000.0 | Synth_pep_425V.1041.1041.3.dta |
| SXPFKXSPLXFR  | 0 8 9 1 | 1180 | 1 | 507.5904 | 1519.749 | 3 | 54.75 | 1.70E-05 | SAPFKASPLVFGK | Phospho (ST) | 0.0000001000000.0 | Synth_pep_425V.1042.1042.3.dta |
| SXPFKXSPLXFR  | 4 9 9 0 | 999  | 1 | 533.5845 | 1597.732 | 3 | 41.77 | 0.00013  | SGPFKSPFLVFGK | Phospho (ST) | 0.0000001000000.0 | Synth_pep_425V.1043.1043.3.dta |
| SXPFKXSPLXFR  | 4 0 3 1 | 1808 | 1 | 488.2424 | 1461.705 | 3 | 64.67 | 5.60E-07 | SGPFKASPLVFGK | Phospho (ST) | 0.0000001000000.0 | Synth_pep_425V.1044.1044.3.dta |
| SXPFKXSPLXFR  | 6 8 1 1 | 1364 | 1 | 496.9091 | 1487.706 | 3 | 48.61 | 5.80E-05 | SEPFKSPFLVFGK | Phospho (ST) | 0.0000001000000.0 | Synth_pep_425V.1045.1045.3.dta |
| SXPFKXSPLXFR  | 8 4 8 0 | 1697 | 1 | 490.9207 | 1469.74  | 3 | 34.79 | 0.0001   | SVPFKSPFLVFGK | Phospho (ST) | 0.0000001000000.0 | Synth_pep_425V.1046.1046.3.dta |
| SXPFKXSPLXFR  | 5 0 2 0 | 1005 | 1 | 510.2564 | 1527.747 | 3 | 48.47 | 8.70E-05 | SLPFKASPLVFGK | Phospho (ST) | 0.0000001000000.0 | Synth_pep_425V.1047.1047.3.dta |
| SXPFKXSPLXFR  | 2 9 9 0 | 1599 | 1 | 557.5914 | 1669.752 | 3 | 47.24 | 2.00E-05 | SEPFKSPFLVFGK | Phospho (ST) | 0.0000001000000.0 | Synth_pep_425V.1               |

|                             |   |          |          |   |       |          |                |              |                   |                                |
|-----------------------------|---|----------|----------|---|-------|----------|----------------|--------------|-------------------|--------------------------------|
| SXPFKXSPLXFGFR 1 8 1 0 363  | 1 | 515.5755 | 1543.705 | 3 | 54.85 | 2.10E-05 | SDPFKVSPLDFGR  | Phospho (ST) | 0.0000001000000.0 | Synth_pep_425V.1107.1107.3.dta |
| SXPFKXSPLXFGFR 3 6 3 1 728  | 1 | 784.8804 | 1567.746 | 2 | 23.96 | 0.011    | SFPFKSPLFFGK   | Phospho (ST) | 0.0000001000000.0 | Synth_pep_425V.1109.1109.2.dta |
| SXPFKXSPLXFGFR 8 9 8 0 1797 | 1 | 526.2687 | 1575.784 | 3 | 43.3  | 7.00E-05 | SVPFKSPLVFGR   | Phospho (ST) | 0.0000001000000.0 | Synth_pep_425V.1111.1111.3.dta |
| SXPFKXSPLXFGFR 2 5 0 0 501  | 1 | 510.2567 | 1527.748 | 3 | 50.98 | 3.40E-05 | SFPFKSPLAFGR   | Phospho (ST) | 0.0000001000000.0 | Synth_pep_425V.1114.1114.4.dta |
| SXPFKXSPLXFGFR 4 9 3 1 988  | 1 | 518.9178 | 1553.732 | 3 | 53.51 | 2.00E-05 | SGPFKSPPLFFGK  | Phospho (ST) | 0.0000001000000.0 | Synth_pep_425V.1115.1115.3.dta |
| SXPFKXSPLXFGFR 5 9 2 0 1185 | 1 | 540.9321 | 1619.774 | 3 | 24.69 | 0.01     | SLPFKYSPLFGR   | Phospho (ST) | 0.0000001000000.0 | Synth_pep_425V.1117.1117.3.dta |
| GPSGVXSQAQLXR 5 2 5 0 1051  | 1 | 469.573  | 1405.697 | 3 | 26.94 | 0.015    | GPSGLVSEAQLLR  | Phospho (ST) | 0.0000001000000.0 | Synth_pep_425V.1118.1118.3.dta |
| SXPFKXSPLXFGFR 8 5 0 0 1702 | 1 | 490.9303 | 1469.769 | 3 | 67.12 | 7.00E-07 | SVPFKSPLAFGR   | Phospho (ST) | 0.0000001000000.0 | Synth_pep_425V.1121.1121.3.dta |
| SXPFKXSPLXFGFR 6 5 9 1 1320 | 1 | 517.5937 | 1549.759 | 3 | 50.95 | 3.40E-05 | SSPFKLSPLYFGK  | Phospho (ST) | 0.0000001000000.0 | Synth_pep_425V.1123.1123.3.dta |
| SXPFKXSPLXFGFR 4 5 9 1 920  | 1 | 507.5906 | 1519.75  | 3 | 59.38 | 5.00E-06 | SGPFKLSPLYFGK  | Phospho (ST) | 0.0000001000000.0 | Synth_pep_425V.1124.1124.3.dta |
| SXPFKXSPLXFGFR 5 9 1 1 1184 | 1 | 526.9251 | 1577.754 | 3 | 40.31 | 0.00028  | SLPFKYSPLDFGK  | Phospho (ST) | 0.0000001000000.0 | Synth_pep_425V.1125.1125.3.dta |
| SXPFKXSPLXFGFR 9 9 5 1 1992 | 1 | 813.9053 | 1625.796 | 2 | 18.06 | 0.016    | SYPFKSPLFFGK   | Phospho (ST) | 0.0000001000000.0 | Synth_pep_425V.1127.1127.2.dta |
| SXPFKXSPLXFGFR 5 9 9 0 1199 | 1 | 552.2722 | 1653.795 | 3 | 58.94 | 1.30E-06 | SLPFKYSPLVFGR  | Phospho (ST) | 0.0000001000000.0 | Synth_pep_425V.1132.1132.3.dta |
| GPSGVXSQAQLXR 9 0 3 0 1807  | 1 | 478.2258 | 1431.656 | 3 | 22.58 | 0.029    | GPSGVSSAAQLFR  | Phospho (ST) | 0.0000001000000.0 | Synth_pep_425V.1135.1135.3.dta |
| SXPFKXSPLXFGFR 5 8 0 0 1161 | 1 | 500.2656 | 1497.775 | 3 | 59.25 | 1.60E-06 | SLPFKYSPLAFGR  | Phospho (ST) | 0.0000001000000.0 | Synth_pep_425V.1137.1137.3.dta |
| SXPFKXSPLXFGFR 4 3 2 0 865  | 1 | 516.9106 | 1547.71  | 3 | 41.48 | 0.00031  | SGPFKFSPLFGR   | Phospho (ST) | 0.0000001000000.0 | Synth_pep_425V.1138.1138.3.dta |
| SXPFKXSPLXFGFR 9 9 3 1 1988 | 1 | 554.2652 | 1659.774 | 3 | 44.01 | 0.00013  | SYPFKSPLFFGK   | Phospho (ST) | 0.0000001000000.0 | Synth_pep_425V.1161.1161.3.dta |
| SXPFKXSPLXFGFR 8 2 3 1 1648 | 1 | 521.5915 | 1561.753 | 3 | 40.92 | 0.00028  | SVPFKESPLFFGK  | Phospho (ST) | 0.0000001000000.0 | Synth_pep_425V.1162.1162.3.dta |
| SXPFKXSPLXFGFR 4 3 9 0 879  | 1 | 528.2532 | 1581.738 | 3 | 48.55 | 1.40E-05 | SGPFKFSPLYFGK  | Phospho (ST) | 0.0000001000000.0 | Synth_pep_425V.1163.1163.3.dta |
| SXPFKXSPLXFGFR 4 3 8 1 878  | 1 | 497.5869 | 1489.739 | 3 | 64.76 | 5.00E-07 | SGPFKFSPLVFGK  | Phospho (ST) | 0.0000001000000.0 | Synth_pep_425V.1164.1164.3.dta |
| SXPFKXSPLXFGFR 5 8 1 0 1163 | 1 | 514.9289 | 1541.765 | 3 | 68.46 | 6.80E-07 | SLPFKYSPLDFGR  | Phospho (ST) | 0.0000001000000.0 | Synth_pep_425V.1165.1165.3.dta |
| GPSGVXSQAQLXR 5 8 8 1 1178  | 1 | 445.575  | 1333.703 | 3 | 68.35 | 5.90E-07 | GPSGLVSSAQLVK  | Phospho (ST) | 0.0000001000000.0 | Synth_pep_425V.1166.1166.3.dta |
| SXPFKXSPLXFGFR 4 3 1 0 863  | 1 | 512.2413 | 1533.702 | 3 | 34.92 | 0.00058  | SGPFKFSPLDFGR  | Phospho (ST) | 0.0000001000000.0 | Synth_pep_425V.1169.1169.3.dta |
| SXPFKXSPLXFGFR 5 8 9 0 1179 | 1 | 530.9415 | 1589.803 | 3 | 56.84 | 2.50E-06 | SLPFKYSPLVFGR  | Phospho (ST) | 0.0000001000000.0 | Synth_pep_425V.1170.1170.3.dta |
| GPSGVXSQAQLXR 5 0 5 0 1011  | 1 | 450.2372 | 1347.69  | 3 | 44.89 | 3.20E-05 | GPSGLVSSAAQLLR | Phospho (ST) | 0.0000001000000.0 | Synth_pep_425V.1171.1171.3.dta |
| SXPFKXSPLXFGFR 4 3 1 1 864  | 1 | 502.9061 | 1505.697 | 3 | 32.23 | 0.0025   | SGPFKFSPLDFGK  | Phospho (ST) | 0.0000001000000.0 | Synth_pep_425V.1172.1172.3.dta |
| SXPFKXSPLXFGFR 1 8 5 1 372  | 1 | 505.5947 | 1513.762 | 3 | 50.51 | 5.30E-05 | SDPFKVSPLFFGK  | Phospho (ST) | 0.0000001000000.0 | Synth_pep_425V.1177.1177.3.dta |
| SXPFKXSPLXFGFR 2 3 1 0 463  | 1 | 536.2468 | 1605.719 | 3 | 55.23 | 7.60E-06 | SFPFKSPLDFGR   | Phospho (ST) | 0.0000001000000.0 | Synth_pep_425V.1178.1178.3.dta |
| SXPFKXSPLXFGFR 3 9 0 0 799  | 1 | 563.5999 | 1687.778 | 3 | 35.65 | 0.00045  | SFPFKYSPLVFGK  | Phospho (ST) | 0.0000001000000.0 | Synth_pep_425V.1179.1179.3.dta |
| GPSGVXSQAQLXR 3 0 5 0 611   | 1 | 461.5658 | 1381.676 | 3 | 46.86 | 3.10E-05 | GPSGFVSSAAQLLR | Phospho (ST) | 0.0000001000000.0 | Synth_pep_425V.1182.1182.3.dta |
| SXPFKXSPLXFGFR 1 5 1 0 303  | 1 | 520.2483 | 1557.723 | 3 | 45.28 | 0.00017  | SDPFKLSPLDFGR  | Phospho (ST) | 0.0000001000000.0 | Synth_pep_425V.1186.1186.3.dta |
| SXPFKXSPLXFGFR 3 8 9 1 780  | 1 | 798.8987 | 1595.783 | 2 | 22.93 | 0.0076   | SFPFKYSPLVFGK  | Phospho (ST) | 0.0000001000000.0 | Synth_pep_425V.1188.1188.2.dta |
| SXPFKXSPLXFGFR 5 5 0 1 1102 | 1 | 495.6023 | 1483.785 | 3 | 49.02 | 3.00E-05 | SLPFKLSPLAFGK  | Phospho (ST) | 0.0000001000000.0 | Synth_pep_425V.1193.1193.3.dta |
| SXPFKXSPLXFGFR 4 5 5 1 912  | 1 | 490.9303 | 1469.769 | 3 | 48.33 | 5.30E-05 | SGPFKLSPLFFGK  | Phospho (ST) | 0.0000001000000.0 | Synth_pep_425V.1194.1194.3.dta |
| SXPFKXSPLXFGFR 6 5 5 1 1312 | 1 | 500.9332 | 1499.778 | 3 | 57.1  | 5.30E-06 | SSPFKLSPLFFGK  | Phospho (ST) | 0.0000001000000.0 | Synth_pep_425V.1197.1197.3.dta |
| SXPFKXSPLXFGFR 8 3 1 0 1663 | 1 | 526.2559 | 1575.746 | 3 | 49.28 | 3.50E-05 | SVPFKSPLDFGR   | Phospho (ST) | 0.0000001000000.0 | Synth_pep_425V.1201.1201.3.dta |
| SXPFKXSPLXFGFR 1 3 1 1 264  | 1 | 522.2412 | 1563.702 | 3 | 51.62 | 2.20E-05 | SDPFKVSPLDFGK  | Phospho (ST) | 0.0000001000000.0 | Synth_pep_425V.1203.1203.3.dta |
| SXPFKXSPLXFGFR 3 8 9 0 779  | 1 | 542.2678 | 1623.782 | 3 | 50.24 | 9.50E-06 | SFPFKYSPLVFGR  | Phospho (ST) | 0.0000001000000.0 | Synth_pep_425V.1204.1204.3.dta |
| SXPFKXSPLXFGFR 5 9 3 1 1188 | 1 | 805.9043 | 1609.794 | 2 | 17.01 | 0.024    | SLPFKYSPLFFGK  | Phospho (ST) | 0.0000001000000.0 | Synth_pep_425V.1205.1205.2.dta |
| GPSGVXSQAQLXR 9 8 5 0 1971  | 1 | 476.2414 | 1425.702 | 3 | 76.61 | 4.60E-08 | GPSGVSSAQLLR   | Phospho (ST) | 0.0000001000000.0 | Synth_pep_425V.1207.1207.3.dta |
| SXPFKXSPLXFGFR 5 5 0 0 1101 | 1 | 504.9375 | 1511.791 | 3 | 61.05 | 7.90E-07 | SLPFKLSPLAFGR  | Phospho (ST) | 0.0000001000000.0 | Synth_pep_425V.1209.1209.3.dta |
| SXPFKXSPLXFGFR 1 3 8 1 278  | 1 | 516.9219 | 1547.744 | 3 | 35.6  | 0.00098  | SDPFKVSPLVFGK  | Phospho (ST) | 0.0000001000000.0 | Synth_pep_425V.1210.1210.3.dta |
| SXPFKXSPLXFGFR 9 3 1 0 1863 | 1 | 547.5875 | 1639.741 | 3 | 49.88 | 2.30E-05 | SYPFKSPLDFGR   | Phospho (ST) | 0.0000001000000.0 | Synth_pep_425V.1211.1211.3.dta |
| GPSGVXSQAQLXR 8 2 5 0 1651  | 1 | 464.9007 | 1391.68  | 3 | 58.89 | 5.60E-06 | GPSGVSSAQLLR   | Phospho (ST) | 0.0000001000000.0 | Synth_pep_425V.1215.1215.3.dta |
| SXPFKXSPLXFGFR 5 5 1 1 1104 | 1 | 510.2652 | 1527.774 | 3 | 64.69 | 1.50E-06 | SLPFKLSPLDFGK  | Phospho (ST) | 0.0000001000000.0 | Synth_pep_425V.1219.1219.3.dta |
| SXPFKXSPLXFGFR 5 5 2 0 1105 | 1 | 524.2723 | 1569.795 | 3 | 52.39 | 1.60E-05 | SLPFKLSPLFGR   | Phospho (ST) | 0.0000001000000.0 | Synth_pep_425V.1220.1220.3.dta |
| SXPFKXSPLXFGFR 3 9 5 1 792  | 1 | 537.6053 | 1609.794 | 3 | 43.09 | 5.90E-05 | SFPFKYSPLFFGK  | Phospho (ST) | 0.0000001000000.0 | Synth_pep_425V.1221.1221.3.dta |
| SXPFKXSPLXFGFR 1 3 1 0 263  | 1 | 531.576  | 1591.706 | 3 | 51.53 | 2.10E-05 | SDPFKVSPLDFGR  | Phospho (ST) | 0.0000001000000.0 | Synth_pep_425V.1222.1222.3.dta |
| GPSGVXSQAQLXR 0 5 5 1 1112  | 1 | 440.9021 | 1319.684 | 3 | 79.8  | 3.40E-08 | GPSGAVSQAQLLK  | Phospho (ST) | 0.0000001000000.0 | Synth_pep_425V.1226.1226.3.dta |
| SXPFKXSPLXFGFR 5 5 1 0 1103 | 1 | 519.601  | 1555.781 | 3 | 53.76 | 1.50E-05 | SLPFKLSPLDFGR  | Phospho (ST) | 0.0000001000000.0 | Synth_pep_425V.1233.1233.3.dta |
| SXPFKXSPLXFGFR 5 3 0 0 1061 | 1 | 516.2657 | 1545.775 | 3 | 51.67 | 6.80E-06 | SLPFKYSPLAFGR  | Phospho (ST) | 0.0000001000000.0 | Synth_pep_425V.1234.1234.3.dta |
| GPSGVXSQAQLXR 5 9 5 1 1192  | 1 | 471.5777 | 1411.711 | 3 | 61.83 | 2.70E-06 | GPSGLVSSAQLLK  | Phospho (ST) | 0.0000001000000.0 | Synth_pep_425V.1235.1235.3.dta |
| SXPFKXSPLXFGFR 5 3 2 0 1065 | 1 | 535.5999 | 1603.778 | 3 | 48.01 | 4.90E-05 | SLPFKYSPLFGR   | Phospho (ST) | 0.0000001000000.0 | Synth_pep_425V.1236.1236.3.dta |
| SXPFKXSPLXFGFR 6 3 3 1 1268 | 1 | 523.5897 | 1567.747 | 3 | 59.35 | 3.40E-06 | SSPFKFSPLFFGK  | Phospho (ST) | 0.0000001000000.0 | Synth_pep_425V.1241.1241.3.dta |
| GPSGVXSQAQLXR 3 5 9 1 720   | 1 | 482.9057 | 1445.695 | 3 | 32.85 | 0.0025   | GPSGFVSLAQLYK  | Phospho (ST) | 0.0000001000000.0 | Synth_pep_425V.1242.1242.3.dta |
| SXPFKXSPLXFGFR 3 9 3 1 788  | 1 | 548.933  | 1643.777 | 3 | 35.42 | 0.0012   | SFPFKYSPLFFGK  | Phospho (ST) | 0.0000001000000.0 | Synth_pep_425V.1243.1243.3.dta |
| SXPFKXSPLXFGFR 5 9 5 0 1191 | 1 | 802.9172 | 1603.82  | 2 | 15.41 | 0.029    | SLPFKYSPLFFGK  | Phospho (ST) | 0.0000001000000.0 | Synth_pep_425V.1244.1244.2.dta |
| SXPFKXSPLXFGFR 5 3 1 1 1064 | 1 | 521.5938 | 1561.759 | 3 | 52.81 | 2.10E-05 | SLPFKFSPLDFGK  | Phospho (ST) | 0.0000001000000.0 | Synth_pep_425V.1249.1249.3.dta |
| GPSGVXSQAQLXR 5 9 5 0 1191  | 1 | 480.9132 | 1439.718 | 3 | 71.25 | 1.60E-07 | GPSGLVSSAQLLR  | Phospho (ST) | 0.0000001000000.0 | Synth_pep_425V.1250.1250.3.dta |
| GPSGVXSQAQLXR 8 2 3 1 1648  | 1 | 466.8938 | 1397.66  | 3 | 27.8  | 0.01     | GPSGVSSAQLLK   | Phospho (ST) | 0.0000001000000.0 | Synth_pep_425V.1255.1255.3.dta |
| GPSGVXSQAQLXR 3 9 5 0 791   | 1 | 492.2412 | 1473.702 | 3 | 48.68 | 5.90E-05 | GPSGFVSSAQLLR  | Phospho (ST) | 0.0000001000000.0 | Synth_pep_425V.1257.1257.3.dta |
| SXPFKXSPLXFGFR 5 3 9 0 1079 | 1 | 546.9419 | 1637.804 | 3 | 49.54 | 1.50E-05 | SLPFKFSPLVFGR  | Phospho (ST) | 0.0000001000000.0 | Synth_pep_425V.1258.1258.3.dta |
| GPSGVXSQAQLXR 9 8 3 0 1967  | 1 | 487.5687 | 1459.684 | 3 | 48.08 | 6.30E-05 | GPSGVSSAQLLR   | Phospho (ST) | 0.0000001000000.0 | Synth_pep_425V.1262.1262.3.dta |
| SXPFKXSPLXFGFR 5 3 1 0 1063 | 1 | 530.9288 | 1589.765 | 3 | 54.3  | 1.30E-05 | SLPFKFSPLDFGR  | Phospho (ST) | 0.0000001000000.0 | Synth_pep_425V.1265.1265.3.dta |
| SXPFKXSPLXFGFR 5 3 2 1 1066 | 1 | 526.2628 | 1575.766 | 3 | 33.89 | 0.00076  | SLPFKFSPLFGR   | Phospho (ST) | 0.0000001000000.0 | Synth_pep_425V.1273.1273.3.dta |
| SXPFKXSPLXFGFR 5 5 8 1 1118 | 1 | 504.947  | 1511.819 | 3 | 38.04 | 0.00024  | SLPFKLSPLVFGK  | Phospho (ST) | 0.0000001000000.0 | Synth_pep_425V.1275.1275.3.dta |
| GPSGVXSQAQLXR 5 3 8 1 1078  | 1 | 461.5748 | 1381.703 | 3 | 55.81 | 9.40E-06 | GPSGLVSSAQLVK  | Phospho (ST) | 0.0000001000000.0 | Synth_pep_425V.1277.1277.3.dta |
| SXPFKXSPLXFGFR 3 8 3 1 768  | 1 | 527.603  | 1579.787 | 3 | 49.24 | 1.30E-05 | SFPFKYSPLFFGK  | Phospho (ST) | 0.0000001000000.0 | Synth_pep_425V.1281.1281.3.dta |
| GPSGVXSQAQLXR 5 5 8 1 1118  | 1 | 450.2463 | 1347.717 | 3 | 70.08 | 2.90E-07 | GPSGLVSSAQLVK  | Phospho (ST) | 0.0000001000000.0 | Synth_pep_425V.1282.1282.3.dta |
| SXPFKXSPLXFGFR 1 3 3 1 268  | 1 | 532.9215 | 1595.743 | 3 | 42.81 | 8.60E-05 | SDPFKFSPLFFGK  | Phospho (ST) | 0.0000001000000.0 | Synth_pep_425V.1289.1289.3.dta |
| SXPFKXSPLXFGFR 3 9 0 0 679  | 1 | 558.2689 | 1671.785 | 3 | 24.52 | 0.0069   | SFPFKYSPLVFGR  | Phospho (ST) | 0.0000001000000.0 | Synth_pep_425V.1290.1290.3.dta |
| SXPFKXSPLXFGFR 1 5 5 1 312  | 1 | 510.2659 | 1527.776 | 3 | 50.51 | 3.70E-05 | SDPFKLSPLFFGK  | Phospho (ST) | 0.0000001000000.0 | Synth_pep_425V.1293.1293.3.dta |
| SXPFKXSPLXFGFR 0 5 3 1 108  | 1 | 506.9305 | 1517.77  | 3 | 16.1  | 0.041    | SAPFKLSPLFFGK  | Phospho (ST) | 0.0000001000000.0 | Synth_pep_425V.1295.1295.3.dta |
| GPSGVXSQAQLXR 5 8 5 0 1171  | 1 | 459.5816 | 1375.723 | 3 | 56.05 | 5.60E-06 | GPSGLVSSAQLLR  | Phospho (ST) | 0.0000001000000.0 | Synth_pep_425V.1297.1297.3.dta |
| GPSGVXSQAQLXR 9 6 5 0 1931  | 1 | 472.2305 | 1413.67  | 3 | 49.16 | 4.90E-05 | GPSGVSSAQLLR   | Phospho (ST) | 0.0000001000000.0 | Synth_pep_425V.1298.1298.3.dta |
| SXPFKXSPLXFGFR 5 5 5 1 1112 | 1 | 763.923  | 1525.831 | 2 | 16.41 | 0.023    | SLPFKLSPLFFGK  | Phospho (ST) | 0.0000001000000.0 | Synth_pep_425V.1305.1305.2.dta |
| GPSGVXSQAQLXR 3 8 8 0 717   | 1 | 470.91   | 1409.708 | 3 | 72.5  | 6.70E-08 | GPSGFVSSAQLVR  | Phospho (ST) | 0.0000001000000.0 | Synth_pep_425V.1307.130        |

|                          |   |          |          |   |       |          |               |              |                   |                              |
|--------------------------|---|----------|----------|---|-------|----------|---------------|--------------|-------------------|------------------------------|
| GPSGVSAQXLR 6 2 1 1 1244 | 1 | 452.2009 | 1353.581 | 3 | 34.57 | 0.0012   | GPSGVSAQXLDK  | Phospho (ST) | 0.0000001000000.0 | Synth_pep_425V.735.735.3.dta |
| GPSGVSAQXLR 0 1 6 0 33   | 1 | 662.7977 | 1323.581 | 2 | 60.64 | 3.40E-06 | GPSGAVSDAQLSR | Phospho (ST) | 0.0000001000000.0 | Synth_pep_425V.737.737.2.dta |
| GPSGVSAQXLR 1 6 0 0 321  | 1 | 442.2013 | 1323.582 | 3 | 45.83 | 0.00011  | GPSGDVSSAQLAR | Phospho (ST) | 0.0000001000000.0 | Synth_pep_425V.738.738.3.dta |
| GPSGVSAQXLR 1 2 6 0 253  | 1 | 461.5357 | 1381.585 | 3 | 55.07 | 1.30E-05 | GPSGDVSAQLSR  | Phospho (ST) | 0.0000001000000.0 | Synth_pep_425V.739.739.3.dta |
| GPSGVSAQXLR 7 2 4 0 1449 | 1 | 446.8724 | 1337.595 | 3 | 32.23 | 0.0028   | GPSGTVSAQLGR  | Phospho (ST) | 0.0000001000000.0 | Synth_pep_425V.743.743.3.dta |
| GPSGVSAQXLR 1 1 0 0 221  | 1 | 451.5324 | 1351.575 | 3 | 47.51 | 6.60E-05 | GPSGDVSDAQLAR | Phospho (ST) | 0.0000001000000.0 | Synth_pep_425V.745.745.3.dta |
| GPSGVSAQXLR 1 2 1 0 243  | 1 | 470.867  | 1409.579 | 3 | 47.87 | 3.80E-05 | GPSGDVSAQLDR  | Phospho (ST) | 0.0000001000000.0 | Synth_pep_425V.746.746.3.dta |
| GPSGVSAQXLR 4 7 7 0 955  | 1 | 437.5401 | 1309.599 | 3 | 38.28 | 0.0002   | GPSGGVSTAQLTR | Phospho (ST) | 0.0000001000000.0 | Synth_pep_425V.748.748.2.dta |
| GPSGVSAQXLR 0 1 7 0 35   | 1 | 669.8047 | 1337.595 | 2 | 81.53 | 2.00E-08 | GPSGAVSDAQLTR | Phospho (ST) | 0.0000001000000.0 | Synth_pep_425V.753.753.2.dta |
| GPSGVSAQXLR 1 2 2 0 245  | 1 | 475.5395 | 1423.597 | 3 | 54.22 | 2.00E-05 | GPSGDVSAQLER  | Phospho (ST) | 0.0000001000000.0 | Synth_pep_425V.754.754.3.dta |
| GPSGVSAQXLR 1 0 4 0 209  | 1 | 432.1972 | 1293.57  | 3 | 48.3  | 0.00018  | GPSGDVSAQLGR  | Phospho (ST) | 0.0000001000000.0 | Synth_pep_425V.761.761.3.dta |
| GPSGVSAQXLR 2 2 2 0 445  | 1 | 480.2109 | 1437.611 | 3 | 64.59 | 2.00E-06 | GPSGEVSAQLER  | Phospho (ST) | 0.0000001000000.0 | Synth_pep_425V.764.764.3.dta |
| GPSGVSAQXLR 0 1 0 0 21   | 1 | 436.8693 | 1307.586 | 3 | 55.8  | 1.40E-05 | GPSGAVSDAQLAR | Phospho (ST) | 0.0000001000000.0 | Synth_pep_425V.769.769.3.dta |
| GPSGVSAQXLR 0 2 1 0 43   | 1 | 456.2043 | 1365.591 | 3 | 42.95 | 0.0003   | GPSGAVSAQLDR  | Phospho (ST) | 0.0000001000000.0 | Synth_pep_425V.770.770.3.dta |
| GPSGVSAQXLR 9 4 2 1 1886 | 1 | 458.2091 | 1371.606 | 3 | 38.14 | 0.0011   | GPSGVSAQLEK   | Phospho (ST) | 0.0000001000000.0 | Synth_pep_425V.787.787.3.dta |
| GPSGVSAQXLR 0 2 0 0 41   | 1 | 441.541  | 1321.601 | 3 | 36.56 | 0.00057  | GPSGAVSAQLAR  | Phospho (ST) | 0.0000001000000.0 | Synth_pep_425V.793.793.3.dta |
| GPSGVSAQXLR 9 6 1 0 1923 | 1 | 472.8757 | 1415.605 | 3 | 60.63 | 5.30E-06 | GPSGVSSAQLDR  | Phospho (ST) | 0.0000001000000.0 | Synth_pep_425V.801.801.3.dta |
| GPSGVSAQXLR 9 4 1 0 1883 | 1 | 462.8727 | 1385.596 | 3 | 34.35 | 0.0018   | GPSGVSSAQLDR  | Phospho (ST) | 0.0000001000000.0 | Synth_pep_425V.803.803.3.dta |
| GPSGVSAQXLR 9 4 0 0 1881 | 1 | 448.2094 | 1341.606 | 3 | 64.04 | 1.70E-06 | GPSGVSSAQLAR  | Phospho (ST) | 0.0000001000000.0 | Synth_pep_425V.806.806.3.dta |
| GPSGVSAQXLR 1 1 8 0 237  | 1 | 460.8764 | 1379.608 | 3 | 41.08 | 0.00036  | GPSGDVSDAQLVR | Phospho (ST) | 0.0000001000000.0 | Synth_pep_425V.809.809.3.dta |
| GPSGVSAQXLR 9 2 4 0 1849 | 1 | 467.5445 | 1399.612 | 3 | 30.66 | 0.0051   | GPSGVSSAQLGR  | Phospho (ST) | 0.0000001000000.0 | Synth_pep_425V.810.810.3.dta |
| GPSGVSAQXLR 2 7 0 0 541  | 1 | 451.5437 | 1351.609 | 3 | 39.2  | 0.0029   | GPSGEVSTAQLAR | Phospho (ST) | 0.0000001000000.0 | Synth_pep_425V.815.815.3.dta |
| GPSGVSAQXLR 9 1 1 0 1823 | 1 | 482.2078 | 1443.602 | 3 | 30.54 | 0.0031   | GPSGVSSAQLDR  | Phospho (ST) | 0.0000001000000.0 | Synth_pep_425V.817.817.3.dta |
| GPSGVSAQXLR 2 1 9 0 439  | 1 | 486.8798 | 1457.618 | 3 | 41.37 | 0.00032  | GPSGEVSDAQLVR | Phospho (ST) | 0.0000001000000.0 | Synth_pep_425V.818.818.3.dta |
| GPSGVSAQXLR 1 8 6 1 374  | 1 | 442.2099 | 1323.608 | 3 | 49.93 | 3.40E-05 | GPSGDVSSAQLSK | Phospho (ST) | 0.0000001000000.0 | Synth_pep_425V.820.820.3.dta |
| GPSGVSAQXLR 9 0 6 1 1814 | 1 | 448.8778 | 1343.612 | 3 | 29.44 | 0.015    | GPSGVSSAQLSK  | Phospho (ST) | 0.0000001000000.0 | Synth_pep_425V.827.827.3.dta |
| GPSGVSAQXLR 8 2 1 0 1643 | 1 | 465.5485 | 1393.624 | 3 | 55.71 | 1.30E-05 | GPSGVVSAQLDR  | Phospho (ST) | 0.0000001000000.0 | Synth_pep_425V.835.835.3.dta |
| GPSGVSAQXLR 2 2 8 0 457  | 1 | 470.2202 | 1407.639 | 3 | 54.45 | 2.30E-05 | GPSGEVSAQLVR  | Phospho (ST) | 0.0000001000000.0 | Synth_pep_425V.836.836.3.dta |
| GPSGVSAQXLR 2 2 9 0 459  | 1 | 491.5511 | 1471.632 | 3 | 46.16 | 0.00012  | GPSGEVSAQLVR  | Phospho (ST) | 0.0000001000000.0 | Synth_pep_425V.838.838.3.dta |
| GPSGVSAQXLR 6 8 2 1 1366 | 1 | 446.8809 | 1337.621 | 3 | 43.6  | 0.00017  | GPSGVSSAQLER  | Phospho (ST) | 0.0000001000000.0 | Synth_pep_425V.839.839.3.dta |
| GPSGVSAQXLR 9 2 0 0 1841 | 1 | 472.2164 | 1413.627 | 3 | 78.03 | 1.00E-07 | GPSGVSSAQLAR  | Phospho (ST) | 0.0000001000000.0 | Synth_pep_425V.850.850.3.dta |
| GPSGVSAQXLR 9 0 0 1 1802 | 1 | 443.5461 | 1327.616 | 3 | 43.01 | 0.00029  | GPSGVSSAQLAK  | Phospho (ST) | 0.0000001000000.0 | Synth_pep_425V.853.853.3.dta |
| GPSGVSAQXLR 9 0 7 1 1816 | 1 | 453.5504 | 1357.629 | 3 | 45.68 | 0.0004   | GPSGVSSAQLTK  | Phospho (ST) | 0.0000001000000.0 | Synth_pep_425V.855.855.3.dta |
| SXPFKXSLFGR 4 6 4 1 930  | 1 | 463.5581 | 1387.653 | 3 | 40.73 | 0.00064  | SGPFKXSLFGR   | Phospho (ST) | 0.0000001000000.0 | Synth_pep_425V.858.858.3.dta |
| GPSGVSAQXLR 0 1 8 0 37   | 1 | 446.2132 | 1335.618 | 3 | 47.11 | 7.30E-05 | GPSGAVSDAQLVR | Phospho (ST) | 0.0000001000000.0 | Synth_pep_425V.859.859.3.dta |
| SXPFKXSLFGR 0 6 0 1 122  | 1 | 708.8492 | 1415.684 | 2 | 24.05 | 0.032    | SAPFKXSLFGR   | Phospho (ST) | 0.0000001000000.0 | Synth_pep_425V.860.860.2.dta |
| SXPFKXSLFGR 6 4 4 1 1290 | 1 | 694.8334 | 1387.652 | 2 | 26.35 | 0.018    | SGPFKXSLFGR   | Phospho (ST) | 0.0000001000000.0 | Synth_pep_425V.866.866.2.dta |
| SXPFKXSLFGR 4 6 0 1 922  | 1 | 701.8423 | 1401.67  | 2 | 30.31 | 0.0087   | SGPFKXSLFGR   | Phospho (ST) | 0.0000001000000.0 | Synth_pep_425V.870.870.2.dta |
| SXPFKXSLFGR 6 6 0 1 1322 | 1 | 478.233  | 1431.677 | 3 | 53.71 | 2.20E-05 | SAPFKXSLFGR   | Phospho (ST) | 0.0000001000000.0 | Synth_pep_425V.873.873.3.dta |
| SXPFKXSLFGR 2 6 0 1 522  | 1 | 492.2368 | 1473.689 | 3 | 58.28 | 9.60E-06 | SEPFKXSLFGR   | Phospho (ST) | 0.0000001000000.0 | Synth_pep_425V.874.874.3.dta |
| SXPFKXSLFGR 4 4 0 1 882  | 1 | 458.2262 | 1371.657 | 3 | 79.65 | 4.10E-08 | SGPFKXSLFGR   | Phospho (ST) | 0.0000001000000.0 | Synth_pep_425V.875.875.3.dta |
| SXPFKXSLFGR 4 6 6 1 934  | 1 | 473.5604 | 1417.659 | 3 | 50    | 0.0001   | SGPFKXSLFGR   | Phospho (ST) | 0.0000001000000.0 | Synth_pep_425V.876.876.3.dta |
| SXPFKXSLFGR 7 1 0 1 1422 | 1 | 737.851  | 1473.688 | 2 | 21.08 | 0.05     | STPFKXSLFGR   | Phospho (ST) | 0.0000001000000.0 | Synth_pep_425V.877.877.2.dta |
| SXPFKXSLFGR 4 6 2 1 926  | 1 | 487.5647 | 1459.672 | 3 | 64.9  | 1.70E-06 | SGPFKXSLFGR   | Phospho (ST) | 0.0000001000000.0 | Synth_pep_425V.878.878.3.dta |
| SXPFKXSLFGR 0 1 0 1 122  | 1 | 482.2352 | 1443.684 | 3 | 35.06 | 0.0016   | SAPFKXSLFGR   | Phospho (ST) | 0.0000001000000.0 | Synth_pep_425V.882.882.3.dta |
| SXPFKXSLFGR 2 4 2 1 486  | 1 | 501.5685 | 1501.684 | 3 | 56.97 | 1.30E-05 | SEPFKXSLFGR   | Phospho (ST) | 0.0000001000000.0 | Synth_pep_425V.883.883.3.dta |
| SXPFKXSLFGR 4 4 2 1 886  | 1 | 715.8385 | 1429.663 | 2 | 25.51 | 0.018    | SGPFKXSLFGR   | Phospho (ST) | 0.0000001000000.0 | Synth_pep_425V.884.884.2.dta |
| GPSGVSAQXLR 0 6 5 0 131  | 1 | 441.5528 | 1331.637 | 3 | 61.77 | 3.00E-06 | GPSGAVSSAQLLR | Phospho (ST) | 0.0000001000000.0 | Synth_pep_425V.886.886.3.dta |
| SXPFKXSLFGR 4 4 0 0 881  | 1 | 467.5617 | 1329.663 | 3 | 58.07 | 1.40E-05 | SGPFKXSLFGR   | Phospho (ST) | 0.0000001000000.0 | Synth_pep_425V.889.889.3.dta |
| SXPFKXSLFGR 2 4 7 1 496  | 1 | 492.2366 | 1473.688 | 3 | 28.91 | 0.0083   | SEPFKXSLFGR   | Phospho (ST) | 0.0000001000000.0 | Synth_pep_425V.890.890.3.dta |
| SXPFKXSLFGR 4 0 4 1 810  | 1 | 686.8354 | 1371.656 | 2 | 20.6  | 0.033    | SGPFKXSLFGR   | Phospho (ST) | 0.0000001000000.0 | Synth_pep_425V.892.892.2.dta |
| SXPFKXSLFGR 4 0 0 1 802  | 1 | 462.8992 | 1385.676 | 3 | 73.51 | 2.00E-07 | SGPFKXSLFGR   | Phospho (ST) | 0.0000001000000.0 | Synth_pep_425V.897.897.3.dta |
| SXPFKXSLFGR 4 6 2 0 925  | 1 | 496.8995 | 1487.677 | 3 | 49.03 | 0.0001   | SGPFKXSLFGR   | Phospho (ST) | 0.0000001000000.0 | Synth_pep_425V.898.898.3.dta |
| SXPFKXSLFGR 0 4 2 0 85   | 1 | 491.5684 | 1471.683 | 3 | 50.12 | 5.10E-05 | SAPFKXSLFGR   | Phospho (ST) | 0.0000001000000.0 | Synth_pep_425V.899.899.3.dta |
| SXPFKXSLFGR 2 4 2 0 485  | 1 | 510.9037 | 1529.689 | 3 | 58.44 | 1.20E-05 | SEPFKXSLFGR   | Phospho (ST) | 0.0000001000000.0 | Synth_pep_425V.900.900.3.dta |
| SXPFKXSLFGR 4 6 1 1 924  | 1 | 482.8918 | 1445.654 | 3 | 43.58 | 0.00053  | SGPFKXSLFGR   | Phospho (ST) | 0.0000001000000.0 | Synth_pep_425V.905.905.3.dta |
| SXPFKXSLFGR 0 6 9 1 140  | 1 | 503.5764 | 1507.707 | 3 | 60.23 | 1.10E-05 | SAPFKXSLFGR   | Phospho (ST) | 0.0000001000000.0 | Synth_pep_425V.906.906.3.dta |
| SXPFKXSLFGR 7 6 9 1 1540 | 1 | 513.5798 | 1537.718 | 3 | 28.71 | 0.003    | STPFKXSLFGR   | Phospho (ST) | 0.0000001000000.0 | Synth_pep_425V.909.909.3.dta |
| SXPFKXSLFGR 2 6 9 1 540  | 1 | 522.9119 | 1565.714 | 3 | 45.85 | 6.50E-05 | SEPFKXSLFGR   | Phospho (ST) | 0.0000001000000.0 | Synth_pep_425V.914.914.3.dta |
| SXPFKXSLFGR 6 6 9 1 1340 | 1 | 508.9085 | 1523.704 | 3 | 48.49 | 8.10E-05 | SGPFKXSLFGR   | Phospho (ST) | 0.0000001000000.0 | Synth_pep_425V.915.915.3.dta |
| SXPFKXSLFGR 2 2 0 0 441  | 1 | 515.5753 | 1543.704 | 3 | 56.84 | 1.30E-05 | SEPFKXSLFGR   | Phospho (ST) | 0.0000001000000.0 | Synth_pep_425V.916.916.3.dta |
| SXPFKXSLFGR 4 0 0 0 801  | 1 | 472.2337 | 1413.679 | 3 | 53.32 | 3.40E-05 | SGPFKXSLFGR   | Phospho (ST) | 0.0000001000000.0 | Synth_pep_425V.921.921.3.dta |
| SXPFKXSLFGR 0 0 0 0 1    | 1 | 476.9055 | 1427.695 | 3 | 48.78 | 8.50E-05 | SAPFKXSLFGR   | Phospho (ST) | 0.0000001000000.0 | Synth_pep_425V.922.922.3.dta |
| SXPFKXSLFGR 0 1 9 1 40   | 1 | 512.9083 | 1535.703 | 3 | 34.81 | 0.0027   | SAPFKXSLFGR   | Phospho (ST) | 0.0000001000000.0 | Synth_pep_425V.923.923.3.dta |
| SXPFKXSLFGR 6 2 2 0 1245 | 1 | 520.9066 | 1559.698 | 3 | 37.45 | 0.00065  | SEPFKXSLFGR   | Phospho (ST) | 0.0000001000000.0 | Synth_pep_425V.924.924.3.dta |
| SXPFKXSLFGR 0 2 9 1 60   | 1 | 517.5801 | 1549.718 | 3 | 54.12 | 2.30E-05 | SAPFKXSLFGR   | Phospho (ST) | 0.0000001000000.0 | Synth_pep_425V.925.925.3.dta |
| SXPFKXSLFGR 2 2 2 0 445  | 1 | 534.9099 | 1601.708 | 3 | 28.5  | 0.0028   | SEPFKXSLFGR   | Phospho (ST) | 0.0000001000000.0 | Synth_pep_425V.927.927.3.dta |
| SXPFKXSLFGR 2 0 0 0 401  | 1 | 496.2405 | 1485.7   | 3 | 55.78 | 1.40E-05 | SEPFKXSLFGR   | Phospho (ST) | 0.0000001000000.0 | Synth_pep_425V.929.929.3.dta |
| SXPFKXSLFGR 4 6 9 0 939  | 1 | 508.2398 | 1521.698 | 3 | 49.08 | 0.00013  | SGPFKXSLFGR   | Phospho (ST) | 0.0000001000000.0 | Synth_pep_425V.930.930.3.dta |
| SXPFKXSLFGR 2 2 9 1 460  | 1 | 536.9152 | 1607.724 | 3 | 49.39 | 2.20E-05 | SEPFKXSLFGR   | Phospho (ST) | 0.0000001000000.0 | Synth_pep_425V.931.931.3.dta |
| GPSGVSAQXLR 5 2 0 0 1041 | 1 | 455.557  | 1363.649 | 3 | 28.25 | 0.0043   | GPSGVSAQXLR   | Phospho (ST) | 0.0000001000000.0 | Synth_pep_425V.935.935.3.dta |
| SXPFKXSLFGR 6 1 0 1 1222 | 1 | 487.5646 | 1459.672 | 3 | 41.03 | 0.00043  | SGPFKXSLFGR   | Phospho (ST) | 0.0000001000000.0 | Synth_pep_425V.937.937.3.dta |
| SXPFKXSLFGR 4 1 1 1 824  | 1 | 492.2236 | 1473.649 | 3 | 50.75 | 5.80E-05 | SGPFKXSLFGR   | Phospho (ST) | 0.0000001000000.0 | Synth_pep_425V.938.938.3.dta |
| GPSGVSAQXLR 0 5 1 0 103  | 1 | 450.8848 | 1349.633 | 3 | 50.29 | 3.70E-05 | GPSGAVSAQLDR  | Phospho (ST) | 0.0000001000000.0 | Synth_pep_425V.940.940.3.dta |
| SXPFKXSLFGR 4 0 9 1 820  | 1 | 493.5737 | 1477.699 | 3 | 71.04 | 8.50E-07 | SGPFKXSLFGR   | Phospho (ST) | 0.0000001000000.0 | Synth_pep_425V.945.945.3.dta |
| SXPFKXSLFGR 4 2 8 0 857  | 1 | 500.9123 | 1499.715 | 3 | 39.58 | 0.00081  | SGPFKXSLFGR   | Phospho (ST) | 0.0000001000000.0 | Synth_pep_425V.947.947.3.dta |
| SXPFKXSLFGR 6 2 1 0 1243 | 1 | 516.2346 | 1545.682 | 3 | 31.39 | 0.0026   | SEPFKXSLFGR   | Phospho (ST) | 0.0000001000000.0 | Synth_pep_425V.948.948.3.dta |
| SXPFKXSLFGR 2 2 1 0 443  | 1 | 530.2386 | 1587.694 | 3 | 58.62 | 3.50E-06 | SEPFKXSLFGR   | Phospho (ST) | 0.0000001000000.0 | Synth_pep_425V.949.949.3.dta |
| SXPFKXSLFGR 2 2 9 0 459  | 1 | 546.2506 | 1635.73  | 3 | 76.82 | 5.30E-08 | SEPFKXSLFGR</ |              |                   |                              |
