# Supplementary material
Source: PubMed Central journal article supplement (PMC3842852)
Supplement: ac400646m_si_007.pdf [file ac400646m_si_007.pdf]

| prot_acc                   | pep_rank | pep_exp_n | pep_exp_n | pep_exp_z | pep_score | pep_expect | pep_seq        | pep_var_mod  | pep_var_mod_pos   | pep_scan_title                             |
|----------------------------|----------|-----------|-----------|-----------|-----------|------------|----------------|--------------|-------------------|--------------------------------------------|
| GPSGVVSAQQLXR 3 3 3 1668   | 1        | 488.9023  | 1463.685  | 3         | 23.09     | 0.04       | GPSGVVSAQQLFK  | Phospho (ST) | 0.0000001000000.0 | Synth_pep_375V.1449.1449.3.dta             |
| GPSGVVSAQQLXR 6 4 6 1294   | 1        | 627.7894  | 1253.564  | 2         | 21.42     | 0.04       | GPSGVVSAQQLSK  | Phospho (ST) | 0.0000001000000.0 | Synth_pep_375V.714.714.2.dta               |
| SXPFKXSLXFLGR 7 6 9 1540   | 1        | 769.8677  | 1537.721  | 2         | 20.08     | 0.04       | STPFKXSLYFLGK  | Phospho (ST) | 0.0000001000000.0 | Synth_pep_275V.971.971.2.dta               |
| GPSGVVSAQQLXR 0 3 3 168    | 1        | 694.8339  | 1387.653  | 2         | 22.81     | 0.04       | GPSGVVSAQQLFK  | Phospho (ST) | 0.0000001000000.0 | Synth_pep_275V.1461.1461.2.dta             |
| GPSGVVSAQQLXR 5 6 6 1194   | 1        | 693.8377  | 1385.661  | 2         | 24.54     | 0.04       | GPSGVVSAQQLSK  | Phospho (ST) | 0.0000001000000.0 | Synth_pep_35V.1017.1017.2.dta              |
| SXPFKXSLXFLGR 3 3 0 1662   | 1        | 518.2584  | 1551.753  | 3         | 14.35     | 0.039      | SFPFKXSLPLAFGK | Phospho (ST) | 0.0000001000000.0 | AIC_synth_test_45.1677.1677.3.dta          |
| GPSGVVSAQQLXR 5 6 0 1121   | 1        | 661.8246  | 1321.635  | 2         | 20.7      | 0.039      | GPSGVVSAQQLAR  | Phospho (ST) | 0.0000001000000.0 | AIC_synth_test_25.1123.1123.2.dta          |
| GPSGVVSAQQLXR 9 5 4 1909   | 1        | 462.2253  | 1383.654  | 3         | 21.17     | 0.039      | GPSGVVSAQQLGR  | Phospho (ST) | 0.0000001000000.0 | AIC_synth_test_45.1255.1255.3.dta          |
| SXPFKXSLXFLGR 4 0 9 0 819  | 1        | 753.858   | 1505.701  | 2         | 22.45     | 0.038      | SFPFKXSLYFLGR  | Phospho (ST) | 0.0000001000000.0 | AIC_synth_test_25.1367.1367.2.dta          |
| SXPFKXSLXFLGR 6 0 0 1202   | 1        | 708.8532  | 1415.692  | 2         | 22.96     | 0.038      | SFPFKXSLPLAFGK | Phospho (ST) | 0.0000001000000.0 | AIC_synth_test_25.1143.1143.2.dta          |
| SXPFKXSLXFLGR 5 3 9 11080  | 1        | 537.6053  | 1609.794  | 3         | 15.02     | 0.038      | SLPFKXSLYFLGK  | Phospho (ST) | 0.0000001000000.0 | Synth_pep_40V.1322.1322.3.dta              |
| SXPFKXSLXFLGR 1 3 9 0 279  | 1        | 820.879   | 1639.743  | 2         | 17.78     | 0.038      | SFPFKXSLYFLGR  | Phospho (ST) | 0.0000001000000.0 | Synth_pep_275V.1369.1369.2.dta             |
| SXPFKXSLXFLGR 0 4 1 0 83   | 1        | 486.895   | 1457.663  | 3         | 22.02     | 0.038      | SAPFKXSLDFGR   | Phospho (ST) | 0.0000001000000.0 | Synth_pep_40V.905.905.3.dta                |
| SXPFKXSLXFLGR 5 9 3 0 1187 | 1        | 819.911   | 1637.808  | 2         | 15.48     | 0.038      | SLPFKXSLPFFGR  | Phospho (ST) | 0.0000001000000.0 | AIC_synth_test_25.1735.1735.2.dta          |
| GPSGVVSAQQLXR 3 9 4 1 790  | 1        | 695.8238  | 1389.633  | 2         | 21.94     | 0.038      | GPSGVVSAQQLGK  | Phospho (ST) | 0.0000001000000.0 | Synth_pep_35V.1243.1243.2.dta              |
| SXPFKXSLXFLGR 3 9 3 1 788  | 1        | 548.9324  | 1643.776  | 3         | 20.5      | 0.037      | SFPFKXSLPFFGK  | Phospho (ST) | 0.0000001000000.0 | AIC_synth_test_45.1629.1629.3.dta          |
| GPSGVVSAQQLXR 2 8 0 1657   | 1        | 460.2299  | 1377.668  | 3         | 19.87     | 0.037      | GPSGVVSAQQLVR  | Phospho (ST) | 0.0000001000000.0 | AIC_synth_test_45.1182.1182.3.dta          |
| SXPFKXSLXFLGR 9 5 0 11902  | 1        | 767.8912  | 1533.768  | 2         | 19.99     | 0.037      | SYPFKXSLPLAFGK | Phospho (ST) | 0.0000001000000.0 | AIC_synth_test_25.1583.1583.2.dta          |
| GPSGVVSAQQLXR 6 3 9 11280  | 1        | 710.8272  | 1419.64   | 2         | 15.59     | 0.037      | GPSGVVSAQQLYK  | Phospho (ST) | 0.0000001000000.0 | Synth_pep_35V.1182.1182.2.dta              |
| GPSGVVSAQQLXR 9 6 9 1 1940 | 1        | 718.8271  | 1435.64   | 2         | 25.73     | 0.037      | GPSGVVSAQQLYK  | Phospho (ST) | 0.0000001000000.0 | Synth_pep_325V.900.900.2.dta               |
| SXPFKXSLXFLGR 4 3 3 0 867  | 1        | 783.8779  | 1565.741  | 2         | 14.33     | 0.037      | SFPFKXSLPFFGR  | Phospho (ST) | 0.0000001000000.0 | Synth_pep_325V.1316.1316.2.dta             |
| SXPFKXSLXFLGR 9 3 4 1 1870 | 1        | 777.8743  | 1553.734  | 2         | 19.87     | 0.037      | SFPFKXSLPFFGK  | Phospho (ST) | 0.0000001000000.0 | Synth_pep_275V.1305.1305.2.dta             |
| SXPFKXSLXFLGR 1 9 9 0 399  | 1        | 552.9186  | 1655.734  | 3         | 17.13     | 0.036      | SFPFKXSLYFLGR  | Phospho (ST) | 0.0000001000000.0 | Synth_pep_40V.1090.1090.3.dta              |
| SXPFKXSLXFLGR 3 9 8 1 798  | 1        | 532.9344  | 1595.781  | 3         | 16.21     | 0.036      | SFPFKXSLYFLGK  | Phospho (ST) | 0.0000001000000.0 | Synth_pep_40V.1248.1248.3.dta              |
| SXPFKXSLXFLGR 4 5 1 1 904  | 1        | 736.8616  | 1471.709  | 2         | 22.72     | 0.036      | SFPFKXSLDFGK   | Phospho (ST) | 0.0000001000000.0 | Synth_pep_425V.1011.1011.2.dta             |
| GPSGVVSAQQLXR 6 8 9 1 380  | 1        | 686.8296  | 1371.645  | 2         | 24.68     | 0.036      | GPSGVVSAQQLYK  | Phospho (ST) | 0.0000001000000.0 | Synth_pep_325V.951.951.2.dta               |
| SXPFKXSLXFLGR 5 3 3 0 1067 | 1        | 811.9108  | 1621.807  | 2         | 15.28     | 0.036      | SFPFKXSLPFFGR  | Phospho (ST) | 0.0000001000000.0 | Synth_pep_275V.1513.1513.2.dta             |
| SXPFKXSLXFLGR 0 9 3 1 188  | 1        | 523.5904  | 1567.749  | 3         | 18.82     | 0.035      | SAPFKXSLPFFGK  | Phospho (ST) | 0.0000001000000.0 | Synth_pep_375V.1189.1189.3.dta             |
| SXPFKXSLXFLGR 4 0 4 1 810  | 1        | 686.8363  | 1371.658  | 2         | 20.31     | 0.035      | SFPFKXSLPFFGK  | Phospho (ST) | 0.0000001000000.0 | Synth_pep_40V.893.893.2.dta                |
| SXPFKXSLXFLGR 2 9 5 1 592  | 1        | 796.8946  | 1591.775  | 2         | 19.2      | 0.035      | SFPFKXSLPFFGK  | Phospho (ST) | 0.0000001000000.0 | AIC_synth_test_25.1496.1496.2.dta          |
| SXPFKXSLXFLGR 8 0 4 1 1610 | 1        | 707.8601  | 1413.706  | 2         | 20.75     | 0.035      | SVPFKXSLPFFGK  | Phospho (ST) | 0.0000001000000.0 | Synth_pep_275V.1005.1005.2.dta             |
| GPSGVVSAQQLXR 8 2 6 0 1653 | 1        | 683.8232  | 1365.632  | 2         | 21.35     | 0.035      | GPSGVVSAQQLSR  | Phospho (ST) | 0.0000001000000.0 | AIC_synth_test_25.945.945.2.dta            |
| GPSGVVSAQQLXR 9 5 9 0 1919 | 1        | 745.8564  | 1489.698  | 2         | 19.33     | 0.035      | GPSGVVSAQQLYR  | Phospho (ST) | 0.0000001000000.0 | Synth_pep_325V.1234.1234.2.dta             |
| GPSGVVSAQQLXR 6 0 0 0 1201 | 1        | 640.802   | 1279.59   | 2         | 21.8      | 0.035      | GPSGVVSAQQLAR  | Phospho (ST) | 0.0000001000000.0 | Synth_pep_375V.803.803.2.dta               |
| SXPFKXSLXFLGR 7 6 4 1 1530 | 1        | 716.8486  | 1431.683  | 2         | 21.82     | 0.035      | SFPFKXSLPFFGK  | Phospho (ST) | 0.0000001000000.0 | AIC_synth_test_25.1039.1039.2.dta          |
| SXPFKXSLXFLGR 9 8 3 1 1968 | 1        | 798.8982  | 1595.782  | 2         | 16.35     | 0.035      | SFPFKXSLPFFGK  | Phospho (ST) | 0.0000001000000.0 | Synth_pep_275V.1336.1336.2.dta             |
| SXPFKXSLXFLGR 3 5 4 0 709  | 1        | 766.8874  | 1531.76   | 2         | 17.09     | 0.035      | SFPFKXSLPFFGR  | Phospho (ST) | 0.0000001000000.0 | Synth_pep_275V.1410.1410.2.dta             |
| SXPFKXSLXFLGR 6 9 3 0 1387 | 1        | 806.8804  | 1611.746  | 2         | 18.58     | 0.035      | SFPFKXSLPFFGR  | Phospho (ST) | 0.0000001000000.0 | Synth_pep_30V_120502214048.1213.1213.2.dta |
| SXPFKXSLXFLGR 0 2 2 1 46   | 1        | 758.8578  | 1515.701  | 2         | 20.84     | 0.035      | SAPFKXSLPFFGK  | Phospho (ST) | 0.0000001000000.0 | AIC_synth_test_25.1089.1089.2.dta          |
| SXPFKXSLXFLGR 9 0 3 1 1808 | 1        | 784.8819  | 1567.749  | 2         | 18.91     | 0.034      | SYPFKXSLPFFGK  | Phospho (ST) | 0.0000001000000.0 | AIC_synth_test_25.1519.1519.2.dta          |
| GPSGVVSAQQLXR 6 5 0 0 1301 | 1        | 441.5525  | 1321.636  | 3         | 21.25     | 0.034      | GPSGVVSAQQLAR  | Phospho (ST) | 0.0000001000000.0 | AIC_synth_test_45.1026.1026.3.dta          |
| SXPFKXSLXFLGR 6 5 9 1 1320 | 1        | 775.8887  | 1549.763  | 2         | 19.6      | 0.033      | SFPFKXSLYFLGK  | Phospho (ST) | 0.0000001000000.0 | Synth_pep_275V.1248.1248.2.dta             |
| SXPFKXSLXFLGR 4 0 4 1 810  | 1        | 686.8354  | 1371.656  | 2         | 20.6      | 0.033      | SFPFKXSLPFFGK  | Phospho (ST) | 0.0000001000000.0 | Synth_pep_425V.892.892.2.dta               |
| SXPFKXSLXFLGR 6 8 1 0 1363 | 1        | 758.8621  | 1515.71   | 2         | 22.36     | 0.033      | SFPFKXSLDFGR   | Phospho (ST) | 0.0000001000000.0 | Synth_pep_275V.1161.1161.2.dta             |
| SXPFKXSLXFLGR 9 4 3 0 1887 | 1        | 791.8759  | 1581.737  | 2         | 14.76     | 0.033      | SFPFKXSLPFFGR  | Phospho (ST) | 0.0000001000000.0 | AIC_synth_test_25.1663.1663.3.dta          |
| GPSGVVSAQQLXR 5 1 3 1 1028 | 1        | 466.8923  | 1397.655  | 3         | 21.33     | 0.033      | GPSGVVSAQQLFK  | Phospho (ST) | 0.0000001000000.0 | AIC_synth_test_45.1423.1423.3.dta          |
| SXPFKXSLXFLGR 6 9 4 1 1390 | 1        | 498.9053  | 1493.694  | 3         | 24.51     | 0.033      | SFPFKXSLPFFGK  | Phospho (ST) | 0.0000001000000.0 | AIC_synth_test_45.1189.1189.3.dta          |
| SXPFKXSLXFLGR 0 6 0 1 122  | 1        | 708.8492  | 1415.684  | 2         | 24.05     | 0.032      | SAPFKXSLPFFGK  | Phospho (ST) | 0.0000001000000.0 | Synth_pep_425V.860.860.2.dta               |
| SXPFKXSLXFLGR 6 3 3 1 1268 | 1        | 784.8817  | 1567.749  | 2         | 19.16     | 0.032      | SFPFKXSLPFFGK  | Phospho (ST) | 0.0000001000000.0 | Synth_pep_275V.1401.1401.2.dta             |
| GPSGVVSAQQLXR 5 5 6 1 1114 | 1        | 668.848   | 1335.682  | 2         | 22.77     | 0.032      | GPSGVVSAQQLSK  | Phospho (ST) | 0.0000001000000.0 | AIC_synth_test_25.1549.1549.2.dta          |
| SXPFKXSLXFLGR 3 3 3 1 668  | 1        | 543.6016  | 1627.783  | 3         | 19.58     | 0.032      | SFPFKXSLPFFGK  | Phospho (ST) | 0.0000001000000.0 | Synth_pep_425V.1373.1373.3.dta             |
| GPSGVVSAQQLXR 9 3 5 1 1872 | 1        | 723.8553  | 1445.696  | 2         | 22.54     | 0.032      | GPSGVVSAQQLLK  | Phospho (ST) | 0.0000001000000.0 | Synth_pep_30V_120502214048.1416.1416.2.dta |
| SXPFKXSLXFLGR 1 3 9 1 280  | 1        | 806.8744  | 1611.734  | 2         | 17.18     | 0.032      | SFPFKXSLYFLGK  | Phospho (ST) | 0.0000001000000.0 | Synth_pep_30V_120502214048.1289.1289.2.dta |
| GPSGVVSAQQLXR 7 9 9 0 1599 | 1        | 493.5621  | 1477.665  | 3         | 21.87     | 0.032      | GPSGVVSAQQLYR  | Phospho (ST) | 0.0000001000000.0 | AIC_synth_test_45.1634.1634.3.dta          |
| SXPFKXSLXFLGR 6 0 3 1 1208 | 1        | 746.8636  | 1491.713  | 2         | 22.92     | 0.031      | SFPFKXSLPFFGK  | Phospho (ST) | 0.0000001000000.0 | Synth_pep_30V_120502214048.1099.1099.2.dta |
| SXPFKXSLXFLGR 2 1 2 0 425  | 1        | 794.855   | 1587.695  | 2         | 19.19     | 0.031      | SAPFKXSLPFFGR  | Phospho (ST) | 0.0000001000000.0 | AIC_synth_test_25.1160.1160.2.dta          |
| GPSGVVSAQQLXR 6 3 0 0 1261 | 1        | 678.8195  | 1355.625  | 2         | 18.66     | 0.031      | GPSGVVSAQQLAR  | Phospho (ST) | 0.0000001000000.0 | Synth_pep_35V.1262.1262.2.dta              |
| GPSGVVSAQQLXR 5 6 1 1 1124 | 1        | 446.8829  | 1337.627  | 3         | 21.03     | 0.031      | GPSGVVSAQQLDK  | Phospho (ST) | 0.0000001000000.0 | AIC_synth_test_45.956.956.3.dta            |
| SXPFKXSLXFLGR 3 1 9 1 640  | 1        | 806.8752  | 1611.736  | 2         | 17.32     | 0.031      | SFPFKXSLYFLGK  | Phospho (ST) | 0.0000001000000.0 | Synth_pep_275V.1217.1217.2.dta             |
| SXPFKXSLXFLGR 7 2 2 1 1446 | 1        | 773.8646  | 1545.715  | 2         | 15.08     | 0.031      | SFPFKXSLPFFGK  | Phospho (ST) | 0.0000001000000.0 | AIC_synth_test_25.1105.1105.2.dta          |
| GPSGVVSAQQLXR 1 7 7 0 355  | 1        | 684.8135  | 1367.613  | 2         | 18.88     | 0.031      | GPSGVVSAQQLTR  | Phospho (ST) | 0.0000001000000.0 | AIC_synth_test_25.808.808.2.dta            |
| SXPFKXSLXFLGR 3 9 5 0 791  | 1        | 819.9092  | 1637.804  | 2         | 16.37     | 0.031      | SFPFKXSLPFFGR  | Phospho (ST) | 0.0000001000000.0 | Synth_pep_275V.1386.1386.2.dta             |
| SXPFKXSLXFLGR 0 9 9 1 200  | 1        | 792.8779  | 1583.741  | 2         | 21.25     | 0.031      | SAPFKXSLYFLGK  | Phospho (ST) | 0.0000001000000.0 | Synth_pep_425V.1020.1020.2.dta             |
| GPSGVVSAQQLXR 5 5 9 1 1120 | 1        | 471.5792  | 1411.716  | 3         | 21.26     | 0.03       | GPSGVVSAQQLYK  | Phospho (ST) | 0.0000001000000.0 | Synth_pep_40V.1401.1401.3.dta              |
| SXPFKXSLXFLGR 7 5 1 0 1503 | 1        | 772.8771  | 1543.74   | 2         | 23.89     | 0.03       | SFPFKXSLDFGR   | Phospho (ST) | 0.0000001000000.0 | Synth_pep_275V.1259.1259.2.dta             |
| SXPFKXSLXFLGR 6 0 5 1 1212 | 1        | 729.8721  | 1457.73   | 2         | 22.89     | 0.03       | SFPFKXSLPFFGK  | Phospho (ST) | 0.0000001000000.0 | Synth_pep_40V.1081.1081.2.dta              |
| SXPFKXSLXFLGR 0 3 9 0 79   | 1        | 798.8856  | 1595.757  | 2         | 16.59     | 0.03       | SAPFKXSLYFLGR  | Phospho (ST) | 0.0000001000000.0 | AIC_synth_test_25.1624.1624.2.dta          |
| SXPFKXSLXFLGR 0 9 2 0 185  | 1        | 789.871   | 1577.728  | 2         | 23.36     | 0.03       | SFPFKXSLPFFGR  | Phospho (ST) | 0.0000001000000.0 | Synth_pep_275V.1097.1097.2.dta             |
| GPSGVVSAQQLXR 1 0 9 1 220  | 1        | 686.8124  | 1371.61   | 2         | 23.68     | 0.03       | GPSGVVSAQQLYK  | Phospho (ST) | 0.0000001000000.0 | Synth_pep_325V.2405.2405.2.dta             |
| SXPFKXSLXFLGR 6 5 4 0 1309 | 1        | 736.8671  | 1471.72   | 2         | 21.11     | 0.03       | SFPFKXSLPFFGR  | Phospho (ST) | 0.0000001000000.0 | Synth_pep_275V.1225.1225.2.dta             |
| SXPFKXSLXFLGR 3 2 9 1 660  | 1        | 813.885   | 1625.756  | 2         | 16.97     | 0.03       | SFPFKXSLYFLGK  | Phospho (ST) | 0.0000001000000.0 | Synth_pep_275V.1214.1214.2.dta             |
| SXPFKXSLXFLGR 0 6 9 1 140  | 1        |           |           |           |           |            |                |              |                   |                                            |

|                           |   |          |          |   |       |       |               |              |                   |                                            |
|---------------------------|---|----------|----------|---|-------|-------|---------------|--------------|-------------------|--------------------------------------------|
| GPSGVXSAQXLR 9 8 4 0 1969 | 1 | 457.553  | 1369.637 | 3 | 22.61 | 0.025 | GPSGVVSAQLGR  | Phospho (ST) | 0.0000001000000.0 | AIC_synth_45.1103.1103.3.dta               |
| SXPFKXSLXFR 5 9 3 1 1188  | 1 | 805.9043 | 1609.794 | 2 | 17.01 | 0.024 | SLPFKXSLPFFGK | Phospho (ST) | 0.0000001000000.0 | Synth_pep_425V.1205.1205.2.dta             |
| GPSGVXSAQXLR 8 5 3 1 1708 | 1 | 691.86   | 1381.706 | 2 | 21.79 | 0.024 | GPSGVVSLAQLFK | Phospho (ST) | 0.0000001000000.0 | Synth_pep_325V.1461.1461.2.dta             |
| SXPFKXSLXFR 9 5 0 0 1901  | 1 | 781.8915 | 1561.769 | 2 | 20.51 | 0.024 | SYPFKSLPLAFGR | Phospho (ST) | 0.0000001000000.0 | AIC_synth_test_25.1615.1615.2.dta          |
| SXPFKXSLXFR 6 4 4 0 1289  | 1 | 708.8362 | 1415.658 | 2 | 24.3  | 0.024 | SSPFKXSLPFGFR | Phospho (ST) | 0.0000001000000.0 | Synth_pep_30V_120502214048.904.904.2.dta   |
| GPSGVXSAQXLR 9 1 6 1 1834 | 1 | 694.8075 | 1387.6   | 2 | 23.89 | 0.024 | GPSGVVSAQLSK  | Phospho (ST) | 0.0000001000000.0 | Synth_pep_35V.794.794.2.dta                |
| SXPFKXSLXFR 5 5 5 1 1112  | 1 | 763.923  | 1525.831 | 2 | 16.41 | 0.023 | SLPFKSLPLFGK  | Phospho (ST) | 0.0000001000000.0 | Synth_pep_425V.1305.1305.2.dta             |
| GPSGVXSAQXLR 2 8 2 0 565  | 1 | 704.8294 | 1407.644 | 2 | 27.68 | 0.023 | GPSGVVSAQALER | Phospho (ST) | 0.0000001000000.0 | AIC_synth_test_25.1065.1065.2.dta          |
| GPSGVXSAQXLR 3 9 3 1 788  | 1 | 740.8455 | 1479.677 | 2 | 25.55 | 0.023 | GPSGVVSAQLFK  | Phospho (ST) | 0.0000001000000.0 | Synth_pep_30V_120502214048.1421.1421.2.dta |
| SXPFKXSLXFR 9 1 2 0 1825  | 1 | 541.5796 | 1621.717 | 3 | 21.42 | 0.023 | SYPFKXSLPFGFR | Phospho (ST) | 0.0000001000000.0 | AIC_synth_45.1167.1167.3.dta               |
| SXPFKXSLXFR 4 3 6 1 874   | 1 | 739.8571 | 1477.7   | 2 | 25.03 | 0.022 | STPFKXSLPFGK  | Phospho (ST) | 0.0000001000000.0 | AIC_synth_test_25.1553.1553.2.dta          |
| GPSGVXSAQXLR 6 0 1 1 1204 | 1 | 648.7967 | 1295.579 | 2 | 22.78 | 0.023 | GPSGVVSAQLDK  | Phospho (ST) | 0.0000001000000.0 | Synth_pep_30V_120502214048.692.692.2.dta   |
| SXPFKXSLXFR 0 2 5 0 51    | 1 | 764.8831 | 1527.752 | 2 | 22.8  | 0.023 | SAPFKXSLPFGFR | Phospho (ST) | 0.0000001000000.0 | AIC_synth_test_25.1289.1289.2.dta          |
| SXPFKXSLXFR 0 1 1 1 24    | 1 | 744.8428 | 1487.671 | 2 | 23.2  | 0.023 | SAPFKXSLPFDGK | Phospho (ST) | 0.0000001000000.0 | Synth_pep_30V_120502214048.938.938.2.dta   |
| SXPFKXSLXFR 6 5 0 1 1302  | 1 | 486.9178 | 1457.732 | 3 | 23.71 | 0.022 | SSPFKXSLPFGK  | Phospho (ST) | 0.0000001000000.0 | Synth_pep_35V.1037.1037.3.dta              |
| SXPFKXSLXFR 7 9 9 1 1600  | 1 | 807.8823 | 1613.75  | 2 | 16.87 | 0.022 | STPFKXSLPFGK  | Phospho (ST) | 0.0000001000000.0 | Synth_pep_40V.1019.1019.2.dta              |
| SXPFKXSLXFR 0 6 9 1 140   | 1 | 754.8631 | 1507.712 | 2 | 25.9  | 0.022 | SAPFKXSLPFGK  | Phospho (ST) | 0.0000001000000.0 | Synth_pep_275V.960.960.2.dta               |
| SXPFKXSLXFR 6 0 9 1 1220  | 1 | 754.8616 | 1507.709 | 2 | 26.04 | 0.022 | SAPFKXSLPFGK  | Phospho (ST) | 0.0000001000000.0 | Synth_pep_40V.945.945.2.dta                |
| GPSGVXSAQXLR 1 1 2 0 225  | 1 | 470.8695 | 1409.587 | 3 | 18.83 | 0.022 | GPSGVVSDAQLER | Phospho (ST) | 0.0000001000000.0 | AIC_synth_45.767.767.3.dta                 |
| GPSGVXSAQXLR 9 3 9 1 1880 | 1 | 748.845  | 1495.676 | 2 | 26.35 | 0.022 | GPSGVVSAQLYK  | Phospho (ST) | 0.0000001000000.0 | Synth_pep_325V.1264.1264.2.dta             |
| SXPFKXSLXFR 6 3 9 1 1280  | 1 | 792.8802 | 1583.746 | 2 | 22.92 | 0.022 | SSPFKXSLPFGK  | Phospho (ST) | 0.0000001000000.0 | AIC_synth_test_25.1553.1609.2.dta          |
| SXPFKXSLXFR 6 0 4 1 1210  | 1 | 701.8416 | 1401.669 | 2 | 25.55 | 0.022 | SSPFKXSLPFGK  | Phospho (ST) | 0.0000001000000.0 | Synth_pep_325V.919.919.2.dta               |
| SXPFKXSLXFR 6 3 9 0 1279  | 1 | 538.2548 | 1611.743 | 3 | 22.72 | 0.022 | SSPFKXSLPFGFR | Phospho (ST) | 0.0000001000000.0 | AIC_synth_test_45.1508.1508.3.dta          |
| SXPFKXSLXFR 7 9 2 1 1586  | 1 | 790.8748 | 1579.735 | 2 | 17.91 | 0.022 | STPFKXSLPFGK  | Phospho (ST) | 0.0000001000000.0 | AIC_synth_test_25.1168.1168.2.dta          |
| SXPFKXSLXFR 5 7 2 1 1146  | 1 | 765.8873 | 1529.76  | 2 | 20.37 | 0.022 | SLPFKXSLPFGK  | Phospho (ST) | 0.0000001000000.0 | Synth_pep_275V.1082.1082.2.dta             |
| SXPFKXSLXFR 5 5 0 1 1102  | 1 | 742.8997 | 1483.785 | 2 | 20.61 | 0.021 | SLPFKXSLPFGK  | Phospho (ST) | 0.0000001000000.0 | Synth_pep_275V.1344.1344.2.dta             |
| GPSGVXSAQXLR 9 8 3 1 1968 | 1 | 716.8483 | 1431.682 | 2 | 24.05 | 0.021 | GPSGVVSAQLFK  | Phospho (ST) | 0.0000001000000.0 | AIC_synth_test_25.1787.1787.2.dta          |
| SXPFKXSLXFR 3 9 5 1 792   | 1 | 805.9068 | 1609.799 | 2 | 17.05 | 0.021 | SXPFKXSLPFGK  | Phospho (ST) | 0.0000001000000.0 | AIC_synth_test_25.1728.1728.2.dta          |
| SXPFKXSLXFR 9 2 9 0 1859  | 1 | 835.8848 | 1669.755 | 2 | 17.04 | 0.021 | SYPFKXSLPFGFR | Phospho (ST) | 0.0000001000000.0 | AIC_synth_test_25.1320.1320.2.dta          |
| SXPFKXSLXFR 0 0 8 1 18    | 1 | 714.8681 | 1427.722 | 2 | 22.88 | 0.021 | SAPFKXSLPFGK  | Phospho (ST) | 0.0000001000000.0 | Synth_pep_275V.1193.1193.2.dta             |
| GPSGVXSAQXLR 7 9 9 1 1600 | 1 | 725.8337 | 1449.653 | 2 | 28.45 | 0.021 | GPSGVVSAQLYK  | Phospho (ST) | 0.0000001000000.0 | Synth_pep_35V.940.940.2.dta                |
| SXPFKXSLXFR 2 6 6 1 534   | 1 | 745.8518 | 1489.689 | 2 | 21.09 | 0.021 | SEPFKXSLPFGK  | Phospho (ST) | 0.0000001000000.0 | AIC_synth_test_25.1072.1072.2.dta          |
| GPSGVXSAQXLR 8 3 4 1 1670 | 1 | 663.8275 | 1325.64  | 2 | 23.31 | 0.021 | GPSGVVSAQLGK  | Phospho (ST) | 0.0000001000000.0 | AIC_synth_test_25.1116.1116.2.dta          |
| GPSGVXSAQXLR 1 0 1 0 203  | 1 | 676.7974 | 1351.58  | 2 | 25.08 | 0.02  | GPSGVVSAQLDR  | Phospho (ST) | 0.0000001000000.0 | AIC_synth_test_25.827.827.2.dta            |
| SXPFKXSLXFR 8 5 9 1 1720  | 1 | 781.9058 | 1561.797 | 2 | 19.09 | 0.02  | SXPFKXSLPFGK  | Phospho (ST) | 0.0000001000000.0 | Synth_pep_40V.1154.1154.2.dta              |
| SXPFKXSLXFR 3 6 3 1 728   | 1 | 784.8801 | 1567.746 | 2 | 21.12 | 0.02  | SSPFKXSLPFGK  | Phospho (ST) | 0.0000001000000.0 | Synth_pep_40V.1097.1097.2.dta              |
| SXPFKXSLXFR 0 1 0 1 22    | 1 | 722.8498 | 1443.685 | 2 | 26.11 | 0.02  | SAPFKXSLPFGK  | Phospho (ST) | 0.0000001000000.0 | Synth_pep_275V.936.936.2.dta               |
| GPSGVXSAQXLR 0 8 6 1 174  | 1 | 640.8176 | 1279.621 | 2 | 22.51 | 0.02  | GPSGVVSAQLSK  | Phospho (ST) | 0.0000001000000.0 | AIC_synth_test_25.1023.1023.2.dta          |
| SXPFKXSLXFR 3 2 9 0 659   | 1 | 552.2604 | 1653.76  | 3 | 20.61 | 0.02  | SXPFKXSLPFGFR | Phospho (ST) | 0.0000001000000.0 | AIC_synth_45.1408.1408.3.dta               |
| SXPFKXSLXFR 9 5 3 0 1907  | 1 | 819.9108 | 1637.807 | 2 | 18.19 | 0.02  | SXPFKXSLPFGFR | Phospho (ST) | 0.0000001000000.0 | AIC_synth_test_25.1857.1857.2.dta          |
| SXPFKXSLXFR 2 3 2 1 466   | 1 | 796.8713 | 1591.728 | 2 | 18.84 | 0.02  | SEPFKXSLPFGK  | Phospho (ST) | 0.0000001000000.0 | Synth_pep_275V.1266.1266.2.dta             |
| GPSGVXSAQXLR 3 6 6 1 734  | 1 | 672.8137 | 1343.613 | 2 | 28.23 | 0.02  | GPSGVVSAQLSK  | Phospho (ST) | 0.0000001000000.0 | Synth_pep_275V.916.916.2.dta               |
| SXPFKXSLXFR 8 0 1 0 1603  | 1 | 500.912  | 1499.714 | 3 | 25.9  | 0.019 | SXPFKXSLPFGFR | Phospho (ST) | 0.0000001000000.0 | Synth_pep_40V.1146.1146.3.dta              |
| GPSGVXSAQXLR 2 1 1 0 423  | 1 | 705.8006 | 1409.587 | 2 | 19.38 | 0.019 | GPSGVVSDAQLDR | Phospho (ST) | 0.0000001000000.0 | AIC_synth_test_25.793.793.2.dta            |
| GPSGVXSAQXLR 5 2 5 0 1051 | 1 | 469.5724 | 1405.696 | 3 | 25.36 | 0.019 | GPSGVVSAQLLR  | Phospho (ST) | 0.0000001000000.0 | AIC_synth_45.1391.1391.3.dta               |
| SXPFKXSLXFR 0 1 4 1 30    | 1 | 715.8409 | 1429.667 | 2 | 24.71 | 0.019 | SAPFKXSLPFGK  | Phospho (ST) | 0.0000001000000.0 | Synth_pep_275V.928.928.2.dta               |
| GPSGVXSAQXLR 9 2 5 1 1852 | 1 | 476.8969 | 1427.669 | 3 | 23.19 | 0.019 | GPSGVVSAQLLLK | Phospho (ST) | 0.0000001000000.0 | Synth_pep_40V.1052.1052.3.dta              |
| GPSGVXSAQXLR 4 9 3 1 988  | 1 | 695.8232 | 1389.632 | 2 | 25.08 | 0.019 | GPSGVVSAQLFK  | Phospho (ST) | 0.0000001000000.0 | Synth_pep_35V.1120.1120.2.dta              |
| GPSGVXSAQXLR 3 3 3 0 667  | 1 | 498.2376 | 1491.691 | 3 | 20.91 | 0.018 | GPSGVVSAQLFR  | Phospho (ST) | 0.0000001000000.0 | Synth_pep_425V.1460.1460.3.dta             |
| SXPFKXSLXFR 0 3 5 1 72    | 1 | 506.9296 | 1517.767 | 3 | 19.51 | 0.018 | SAPFKXSLPFGK  | Phospho (ST) | 0.0000001000000.0 | AIC_synth_test_25.1464.1464.3.dta          |
| SXPFKXSLXFR 2 1 5 1 432   | 1 | 772.8764 | 1543.738 | 2 | 26.23 | 0.018 | SEPFKXSLPFGK  | Phospho (ST) | 0.0000001000000.0 | AIC_synth_test_25.1297.1297.2.dta          |
| GPSGVXSAQXLR 5 3 3 1 708  | 1 | 715.8595 | 1429.704 | 2 | 23.11 | 0.018 | GPSGVVSAQLFK  | Phospho (ST) | 0.0000001000000.0 | Synth_pep_275V.1660.1660.2.dta             |
| SXPFKXSLXFR 0 6 8 0 137   | 1 | 736.8698 | 1471.725 | 2 | 22.88 | 0.018 | SAPFKXSLPFGFR | Phospho (ST) | 0.0000001000000.0 | AIC_synth_test_25.1255.1255.2.dta          |
| SXPFKXSLXFR 6 4 4 1 1290  | 1 | 694.8334 | 1387.652 | 2 | 26.35 | 0.018 | SSPFKXSLPFGK  | Phospho (ST) | 0.0000001000000.0 | Synth_pep_425V.866.866.2.dta               |
| SXPFKXSLXFR 5 5 6 1 1114  | 1 | 750.8975 | 1499.781 | 2 | 21.79 | 0.018 | SLPFKXSLPFGK  | Phospho (ST) | 0.0000001000000.0 | AIC_synth_test_25.1681.1681.2.dta          |
| SXPFKXSLXFR 4 4 2 1 886   | 1 | 715.8385 | 1429.663 | 2 | 25.51 | 0.018 | SGPFKXSLPFGK  | Phospho (ST) | 0.0000001000000.0 | Synth_pep_425V.884.884.2.dta               |
| SXPFKXSLXFR 5 3 8 1 1078  | 1 | 516.2744 | 1545.801 | 3 | 20.56 | 0.018 | SLPFKXSLPFGK  | Phospho (ST) | 0.0000001000000.0 | Synth_pep_40V.1306.1306.3.dta              |
| GPSGVXSAQXLR 0 8 6 0 173  | 1 | 654.817  | 1307.62  | 2 | 22.81 | 0.018 | GPSGVVSAQLSR  | Phospho (ST) | 0.0000001000000.0 | Synth_pep_30V_120502214048.2497.2497.2.dta |
| SXPFKXSLXFR 9 9 6 0 1993  | 1 | 814.8791 | 1627.744 | 2 | 22.38 | 0.018 | SYPFKXSLPFGFR | Phospho (ST) | 0.0000001000000.0 | Synth_pep_275V.1179.1179.2.dta             |
| SXPFKXSLXFR 3 6 4 1 730   | 1 | 739.8573 | 1477.7   | 2 | 25.17 | 0.018 | SSPFKXSLPFGK  | Phospho (ST) | 0.0000001000000.0 | Synth_pep_275V.1117.1117.2.dta             |
| GPSGVXSAQXLR 3 4 5 0 691  | 1 | 684.8378 | 1367.661 | 2 | 23.64 | 0.018 | GPSGVVSAQLLR  | Phospho (ST) | 0.0000001000000.0 | AIC_synth_test_25.1464.1464.2.dta          |
| GPSGVXSAQXLR 0 5 2 0 105  | 1 | 682.8332 | 1363.652 | 2 | 24.26 | 0.018 | GPSGVVSAQLER  | Phospho (ST) | 0.0000001000000.0 | Synth_pep_275V.1061.1061.2.dta             |
| GPSGVXSAQXLR 9 5 6 0 1913 | 1 | 707.8387 | 1413.663 | 2 | 25.33 | 0.018 | GPSGVVSAQLSR  | Phospho (ST) | 0.0000001000000.0 | AIC_synth_test_25.1405.1405.2.dta          |
| GPSGVXSAQXLR 7 6 9 1 1540 | 1 | 687.8181 | 1373.622 | 2 | 29.66 | 0.018 | GPSGVVSAQLYK  | Phospho (ST) | 0.0000001000000.0 | Synth_pep_35V.825.825.2.dta                |
| GPSGVXSAQXLR 4 9 3 1 988  | 1 | 695.8235 | 1389.633 | 2 | 25.13 | 0.018 | GPSGVVSAQLFK  | Phospho (ST) | 0.0000001000000.0 | Synth_pep_275V.1228.1228.2.dta             |
| GPSGVXSAQXLR 9 5 7 0 1915 | 1 | 476.9008 | 1427.881 | 3 | 24.23 | 0.018 | GPSGVVSAQLTR  | Phospho (ST) | 0.0000001000000.0 | AIC_synth_45.1303.1303.3.dta               |
| GPSGVXSAQXLR 3 0 1 0 603  | 1 | 692.8159 | 1383.617 | 2 | 23.78 | 0.018 | GPSGVVSAQLDR  | Phospho (ST) | 0.0000001000000.0 | AIC_synth_test_25.1226.1226.2.dta          |
| SXPFKXSLXFR 5 3 3 1 1068  | 1 | 797.9082 | 1593.802 | 2 | 19.76 | 0.017 | SXPFKXSLPFGK  | Phospho (ST) | 0.0000001000000.0 | Synth_pep_275V.1505.1505.2.dta             |
| SXPFKXSLXFR 2 5 3 1 503   | 1 | 786.8765 | 1571.739 | 2 | 24.53 | 0.017 | SEPFKXSLPFGFR | Phospho (ST) | 0.0000001000000.0 | Synth_pep_275V.1273.1273.2.dta             |
| SXPFKXSLXFR 5 1 5 1 1032  | 1 | 764.8979 | 1527.781 | 2 | 23.81 | 0.017 | SLPFKXSLPFGK  | Phospho (ST) | 0.0000001000000.0 | Synth_pep_275V.1206.1206.2.dta             |
| SXPFKXSLXFR 5 9 1 0 1183  | 1 | 803.8865 | 1605.759 | 2 | 24.46 | 0.017 | SLPFKXSLPFGFR | Phospho (ST) | 0.0000001000000.0 | Synth_pep_275V.1265.1265.2.dta             |
| SXPFKXSLXFR 8 9 1 0 1783  | 1 | 796.8779 | 1591.741 | 2 | 25.05 | 0.017 | SXPFKXSLPFGFR | Phospho (ST) | 0.0000001000000.0 | Synth_pep_275V.1180.1180.2.dta             |
| SXPFKXSLXFR 1 6 9 1 340   | 1 | 518.239  | 1551.695 | 3 | 24.49 | 0.017 | SDPFKXSLPFGK  | Phospho (ST) | 0.0000001000000.0 | Synth_pep_425V.971.971.3.dta               |
| SXPFKXSLXFR 4 4 9 1 900   | 1 | 488.9012 | 1463.682 | 3 | 26.85 | 0.017 | SGPFKXSLPFGK  | Phospho (ST) | 0.0000001000000.0 | AIC_synth_45.1072.1072.3.dta               |
| GPSGVXSAQXLR 3 9 4 0 789  | 1 | 709.8258 | 1417.637 | 2 | 25.65 | 0.017 | GPSGVVSAQLFR  | Phospho (ST) | 0.0000001000000.0 | Synth_pep_35V.1261.1261.2.dta              |
| GPSGVXSAQXLR 4 5 3 0 907  | 1 | 684.8384 | 1367.662 | 2 | 24.04 | 0.017 | GPSGVVSAQLFR  | Phospho (ST) | 0.0000001000000.0 | AIC_synth_test_25.1815.1815.2.dta          |
| SXPFKXSLXFR 7 3 1 1 1464  | 1 | 775.8684 | 1549.722 | 2 | 25.74 | 0.017 | STPFKXSLPFGK  | Phospho (ST) | 0.0000001000000.0 | Synth_pep_30V_120502214048.1235.1235.2.dta |
| GPSGVXSAQXLR 0 9 2 1 186  | 1 | 693.8204 | 1385.626 | 2 | 25.71 | 0.017 | GPSGVVSAQLEK  | Phospho (ST) | 0.0000001000000.0 | Synth_pep_325V.913.913.2.dta               |
| SXPFKXSLXFR 0 2 2 1 46    |   |          |          |   |       |       |               |              |                   |                                            |

|                            |   |          |          |   |       |       |                |              |                   |                                          |
|----------------------------|---|----------|----------|---|-------|-------|----------------|--------------|-------------------|------------------------------------------|
| GPSGXVSAQXLR 5 2 5 0 1051  | 1 | 469.573  | 1405.697 | 3 | 26.94 | 0.015 | GPSGLVSEAQLLR  | Phospho (ST) | 0.0000001000000.0 | Synth_pep_425V.1118.1118.3.dta           |
| SXPFKXSPFXFGR 1 9 8 1 398  | 1 | 522.2529 | 1563.737 | 3 | 23.38 | 0.015 | SDFPKYSPLVFGK  | Phospho (ST) | 0.0000001000000.0 | Synth_pep_425V.1090.1090.3.dta           |
| SXPFKXSPFXFGR 6 9 2 0 1385 | 1 | 797.8673 | 1593.72  | 2 | 25.62 | 0.015 | SDFPKYSPLFEGR  | Phospho (ST) | 0.0000001000000.0 | Synth_pep_275V.1107.1107.3.dta           |
| SXPFKXSPFXFGR 0 8 8 1 178  | 1 | 486.2596 | 1455.757 | 3 | 23.85 | 0.015 | SAPFKYSPLVFGK  | Phospho (ST) | 0.0000001000000.0 | Synth_pep_425V.1071.1071.3.dta           |
| SXPFKXSPFXFGR 6 5 6 0 1313 | 1 | 751.8738 | 1501.733 | 2 | 20.02 | 0.015 | SPPFKSPLSFGFR  | Phospho (ST) | 0.0000001000000.0 | Synth_pep_325V.1148.1148.2.dta           |
| SXPFKXSPFXFGR 6 4 4 0 1289 | 1 | 708.837  | 1415.659 | 2 | 26.39 | 0.015 | SPPFKSPLGFGR   | Phospho (ST) | 0.0000001000000.0 | Synth_pep_275V.937.937.2.dta             |
| SXPFKXSPFXFGR 3 3 3 0 667  | 1 | 828.9023 | 1655.79  | 2 | 18.23 | 0.015 | SFFPKSPLFFGR   | Phospho (ST) | 0.0000001000000.0 | Synth_pep_275V.1561.1561.2.dta           |
| SXPFKXSPFXFGR 0 7 9 1 160  | 1 | 761.8737 | 1521.733 | 2 | 24.91 | 0.015 | SAPFKYSPLVFGK  | Phospho (ST) | 0.0000001000000.0 | Synth_pep_275V.1011.1011.2.dta           |
| SXPFKXSPFXFGR 2 2 2 1 446  | 1 | 787.8602 | 1573.706 | 2 | 20.34 | 0.015 | SEFPKESPLFEGK  | Phospho (ST) | 0.0000001000000.0 | Synth_pep_275V.963.963.2.dta             |
| GPSGXVSAQXLR 9 0 6 1 1814  | 1 | 448.8778 | 1343.612 | 3 | 29.44 | 0.015 | GPSGVVSAQQLSK  | Phospho (ST) | 0.0000001000000.0 | Synth_pep_425V.827.827.3.dta             |
| GPSGXVSAQXLR 8 1 8 0 1637  | 1 | 682.8328 | 1363.651 | 3 | 25.01 | 0.015 | GPSGVVSDAQLVR  | Phospho (ST) | 0.0000001000000.0 | Synth_pep_275V.957.957.2.dta             |
| SXPFKXSPFXFGR 6 1 9 1 1240 | 1 | 776.8585 | 1551.702 | 2 | 22.88 | 0.015 | SPPFKSPLVFGK   | Phospho (ST) | 0.0000001000000.0 | Synth_pep_30V_120502214048.973.973.2.dta |
| SXPFKXSPFXFGR 9 0 9 1 1820 | 1 | 792.8785 | 1583.743 | 2 | 24.88 | 0.015 | SPPFKSPLVFGK   | Phospho (ST) | 0.0000001000000.0 | Synth_pep_275V.1104.1104.2.dta           |
| GPSGXVSAQXLR 5 6 5 1 1132  | 1 | 446.2341 | 1335.68  | 3 | 26.51 | 0.014 | GPSGLVSSAQLLK  | Phospho (ST) | 0.0000001000000.0 | AIC_synth_45.1282.1282.3.dta             |
| GPSGXVSAQXLR 5 3 2 0 1065  | 1 | 480.9009 | 1439.681 | 3 | 23.06 | 0.014 | GPSGLVSAQALER  | Phospho (ST) | 0.0000001000000.0 | AIC_synth_45.1500.1500.3.dta             |
| SXPFKXSPFXFGR 9 3 1 0 1863 | 1 | 547.5882 | 1639.743 | 3 | 22.09 | 0.014 | SYPFKSPLDFGR   | Phospho (ST) | 0.0000001000000.0 | AIC_synth_45.1573.1573.3.dta             |
| GPSGXVSAQXLR 3 8 9 0 779   | 1 | 730.8495 | 1459.685 | 2 | 24.74 | 0.014 | GPSGVVSAQLYR   | Phospho (ST) | 0.0000001000000.0 | Synth_pep_275V.1292.1292.2.dta           |
| SXPFKXSPFXFGR 7 8 2 0 1565 | 1 | 772.8788 | 1543.743 | 2 | 25.98 | 0.014 | SDFPKYSPLFEGR  | Phospho (ST) | 0.0000001000000.0 | Synth_pep_275V.1182.1182.2.dta           |
| GPSGXVSAQXLR 4 8 4 1 970   | 1 | 618.8052 | 1235.596 | 2 | 18.56 | 0.014 | GPSGVVSAQGLK   | Phospho (ST) | 0.0000001000000.0 | AIC_synth_test_25.960.960.2.dta          |
| SXPFKXSPFXFGR 7 0 8 1 1418 | 1 | 729.8735 | 1457.733 | 2 | 25.98 | 0.014 | STPFKASPLVFGK  | Phospho (ST) | 0.0000001000000.0 | Synth_pep_275V.1194.1194.2.dta           |
| GPSGXVSAQXLR 9 8 4 0 1969  | 1 | 685.8258 | 1369.637 | 2 | 25.05 | 0.014 | GPSGVVSAQQLGR  | Phospho (ST) | 0.0000001000000.0 | AIC_synth_test_25.1217.1217.2.dta        |
| SXPFKXSPFXFGR 3 5 2 0 705  | 1 | 802.8961 | 1603.778 | 2 | 23.45 | 0.014 | SFPFKSPLFEGR   | Phospho (ST) | 0.0000001000000.0 | Synth_pep_275V.1409.1409.2.dta           |
| SXPFKXSPFXFGR 7 8 2 0 645  | 1 | 810.8759 | 1619.732 | 2 | 23.16 | 0.014 | STPFKESPLFEGR  | Phospho (ST) | 0.0000001000000.0 | Synth_pep_275V.1189.1189.2.dta           |
| GPSGXVSAQXLR 4 4 1 1 884   | 1 | 626.7845 | 1251.554 | 2 | 29.41 | 0.014 | GPSGVVSAQQLDK  | Phospho (ST) | 0.0000001000000.0 | Synth_pep_30V_120502214048.721.721.2.dta |
| GPSGXVSAQXLR 7 9 3 0 1587  | 1 | 488.23   | 1461.668 | 3 | 25.88 | 0.014 | GPSGVVSYAQLFR  | Phospho (ST) | 0.0000001000000.0 | Synth_pep_40V.1455.1455.3.dta            |
| SXPFKXSPFXFGR 4 9 4 1 990  | 1 | 732.8501 | 1463.686 | 2 | 27.61 | 0.014 | SGPFKYSPLVFGK  | Phospho (ST) | 0.0000001000000.0 | Synth_pep_275V.1072.1072.2.dta           |
| SXPFKXSPFXFGR 5 4 3 0 1087 | 1 | 766.8881 | 1531.762 | 2 | 21.01 | 0.014 | SLPFKESPLFFGR  | Phospho (ST) | 0.0000001000000.0 | AIC_synth_test_25.1791.1791.2.dta        |
| SXPFKXSPFXFGR 7 2 4 1 1450 | 1 | 737.85   | 1473.686 | 2 | 26.75 | 0.014 | STPFKESPLVFGK  | Phospho (ST) | 0.0000001000000.0 | Synth_pep_30V_120502214048.892.892.2.dta |
| SXPFKXSPFXFGR 4 4 5 0 891  | 1 | 721.8633 | 1441.712 | 2 | 26.75 | 0.014 | SPPFKSPLSFGFR  | Phospho (ST) | 0.0000001000000.0 | AIC_synth_test_25.1295.1295.2.dta        |
| GPSGXVSAQXLR 6 5 2 1 1306  | 1 | 676.8259 | 1351.637 | 2 | 25.48 | 0.014 | SLPFKESPLVFGK  | Phospho (ST) | 0.0000001000000.0 | Synth_pep_30V_120502214048.960.960.2.dta |
| SXPFKXSPFXFGR 9 9 9 1 2000 | 1 | 838.8915 | 1675.769 | 2 | 21.5  | 0.013 | SYPFKYSPLVFGK  | Phospho (ST) | 0.0000001000000.0 | Synth_pep_375V.1083.1083.2.dta           |
| GPSGXVSAQXLR 8 5 3 0 1707  | 1 | 705.8575 | 1409.7   | 2 | 24.84 | 0.013 | GPSGVVSAQLFGR  | Phospho (ST) | 0.0000001000000.0 | Synth_pep_325V.1481.1481.2.dta           |
| SXPFKXSPFXFGR 5 1 8 0 1037 | 1 | 771.8893 | 1541.764 | 2 | 25.65 | 0.013 | GPSGVVSAQQLGR  | Phospho (ST) | 0.0000001000000.0 | AIC_synth_test_25.1428.1428.2.dta        |
| GPSGXVSAQXLR 0 4 5 0 91    | 1 | 646.8223 | 1291.63  | 2 | 21.67 | 0.013 | GPSGVVSAQQLLR  | Phospho (ST) | 0.0000001000000.0 | AIC_synth_test_25.1096.1096.2.dta        |
| SXPFKXSPFXFGR 2 9 1 0 583  | 1 | 541.5792 | 1621.716 | 3 | 24.05 | 0.013 | SFPFKSPLDFGR   | Phospho (ST) | 0.0000001000000.0 | Synth_pep_425V.1052.1052.3.dta           |
| SXPFKXSPFXFGR 1 5 8 1 318  | 1 | 757.8891 | 1513.764 | 2 | 26.79 | 0.013 | SDFPKYSPLVFGK  | Phospho (ST) | 0.0000001000000.0 | AIC_synth_test_25.1687.1687.2.dta        |
| GPSGXVSAQXLR 3 9 3 1 788   | 1 | 740.847  | 1479.68  | 2 | 27.23 | 0.013 | SPSGVVSVAQLFK  | Phospho (ST) | 0.0000001000000.0 | Synth_pep_375V.1300.1300.2.dta           |
| SXPFKXSPFXFGR 2 4 2 0 485  | 1 | 510.9041 | 1529.69  | 3 | 27.96 | 0.013 | SEFPKESPLFEGR  | Phospho (ST) | 0.0000001000000.0 | AIC_synth_45.1022.1022.3.dta             |
| SXPFKXSPFXFGR 6 0 1 1 1204 | 1 | 730.8448 | 1459.675 | 2 | 26.91 | 0.013 | SPPFKSPLDFGK   | Phospho (ST) | 0.0000001000000.0 | Synth_pep_275V.1009.1009.2.dta           |
| SXPFKXSPFXFGR 9 4 9 0 1899 | 1 | 799.8735 | 1597.733 | 2 | 21.84 | 0.013 | SYPFKYSPLVFGK  | Phospho (ST) | 0.0000001000000.0 | AIC_synth_test_25.1311.1311.2.dta        |
| SXPFKXSPFXFGR 0 2 1 0 43   | 1 | 765.8497 | 1529.685 | 2 | 27.28 | 0.013 | SAPFKESPLDFGR  | Phospho (ST) | 0.0000001000000.0 | Synth_pep_275V.994.994.2.dta             |
| SXPFKXSPFXFGR 0 4 9 1 100  | 1 | 493.5742 | 1477.701 | 3 | 26.87 | 0.013 | SAPFKYSPLVFGK  | Phospho (ST) | 0.0000001000000.0 | AIC_synth_45.1030.1030.3.dta             |
| SXPFKXSPFXFGR 7 8 2 1 1566 | 1 | 758.8778 | 1515.741 | 2 | 24.93 | 0.013 | STPFKESPLFEGK  | Phospho (ST) | 0.0000001000000.0 | AIC_synth_test_25.1543.1543.2.dta        |
| SXPFKXSPFXFGR 9 0 0 1 1802 | 1 | 498.2464 | 1491.717 | 3 | 27.17 | 0.013 | SYPFKESPLVFGK  | Phospho (ST) | 0.0000001000000.0 | AIC_synth_test_45.1158.1158.3.dta        |
| GPSGXVSAQXLR 4 4 8 1 898   | 1 | 618.8033 | 1235.592 | 2 | 18.86 | 0.013 | GPSGVVSAQQLVK  | Phospho (ST) | 0.0000001000000.0 | Synth_pep_325V.861.861.2.dta             |
| SXPFKXSPFXFGR 1 3 6 0 273  | 1 | 782.8632 | 1563.712 | 2 | 26.57 | 0.013 | SDFPKYSPLSFGFR | Phospho (ST) | 0.0000001000000.0 | Synth_pep_275V.1342.1342.2.dta           |
| SXPFKXSPFXFGR 5 4 3 1 1088 | 1 | 502.2587 | 1503.754 | 3 | 21.99 | 0.013 | SLPFKESPLFFGK  | Phospho (ST) | 0.0000001000000.0 | Synth_pep_35V.1133.1133.3.dta            |
| SXPFKXSPFXFGR 5 2 5 0 1051 | 1 | 785.9058 | 1569.797 | 2 | 23.31 | 0.013 | SLPFKESPLFGR   | Phospho (ST) | 0.0000001000000.0 | Synth_pep_275V.1371.1371.2.dta           |
| SXPFKXSPFXFGR 2 6 4 1 530  | 1 | 730.8453 | 1459.676 | 2 | 27.13 | 0.013 | SEFPKESPLFFGK  | Phospho (ST) | 0.0000001000000.0 | Synth_pep_275V.910.910.2.dta             |
| GPSGXVSAQXLR 0 5 7 0 115   | 1 | 446.2241 | 1335.65  | 3 | 24.62 | 0.013 | GPSGAVSAQLTR   | Phospho (ST) | 0.0000001000000.0 | AIC_synth_45.1128.1128.3.dta             |
| GPSGXVSAQXLR 1 8 4 1 370   | 1 | 647.8077 | 1293.601 | 2 | 28.2  | 0.013 | GPSGVVSAQQLGK  | Phospho (ST) | 0.0000001000000.0 | Synth_pep_35V.843.843.2.dta              |
| GPSGXVSAQXLR 4 9 0 1 982   | 1 | 657.8075 | 1313.6   | 2 | 27.1  | 0.013 | GPSGVVSAQQLAK  | Phospho (ST) | 0.0000001000000.0 | Synth_pep_30V_120502214048.867.867.2.dta |
| SXPFKXSPFXFGR 2 9 4 1 590  | 1 | 512.9099 | 1535.708 | 3 | 28.1  | 0.013 | SEFPKYSPLFFGK  | Phospho (ST) | 0.0000001000000.0 | AIC_synth_45.1190.1190.3.dta             |
| GPSGXVSAQXLR 3 8 2 1 766   | 1 | 466.8949 | 1397.663 | 3 | 26.1  | 0.013 | GPSGVVSAQLEK   | Phospho (ST) | 0.0000001000000.0 | AIC_synth_45.1561.1561.3.dta             |
| SXPFKXSPFXFGR 0 5 0 1 102  | 1 | 721.8755 | 1441.736 | 2 | 24.48 | 0.012 | SAPFKSPLVFGK   | Phospho (ST) | 0.0000001000000.0 | Synth_pep_425V.1021.1021.2.dta           |
| SXPFKXSPFXFGR 5 1 8 0 1037 | 1 | 771.8904 | 1541.766 | 2 | 26.06 | 0.012 | SLPFKDSPLVFGK  | Phospho (ST) | 0.0000001000000.0 | AIC_synth_test_25.1631.1631.2.dta        |
| SXPFKXSPFXFGR 0 8 0 1 162  | 1 | 714.8698 | 1427.725 | 2 | 23.02 | 0.012 | SYPFKESPLVFGK  | Phospho (ST) | 0.0000001000000.0 | AIC_synth_test_25.1488.1488.2.dta        |
| SXPFKXSPFXFGR 4 6 9 1 940  | 1 | 747.8558 | 1493.697 | 2 | 28.63 | 0.012 | SGPFKYSPLVFGK  | Phospho (ST) | 0.0000001000000.0 | AIC_synth_test_25.1144.1144.2.dta        |
| SXPFKXSPFXFGR 2 2 9 0 459  | 1 | 818.8734 | 1635.732 | 2 | 23.36 | 0.012 | SEFPKESPLVFGK  | Phospho (ST) | 0.0000001000000.0 | Synth_pep_275V.1038.1038.2.dta           |
| GPSGXVSAQXLR 5 1 0 0 1021  | 1 | 450.8852 | 1349.634 | 3 | 25.17 | 0.012 | GPSGLVSDAQLAR  | Phospho (ST) | 0.0000001000000.0 | AIC_synth_45.1055.1055.3.dta             |
| SXPFKXSPFXFGR 9 1 9 0 1839 | 1 | 828.8765 | 1655.738 | 2 | 23.06 | 0.012 | SYPFKDSPLVFGK  | Phospho (ST) | 0.0000001000000.0 | AIC_synth_test_25.1347.1347.2.dta        |
| SXPFKXSPFXFGR 0 5 3 1 108  | 1 | 759.8904 | 1517.766 | 2 | 21.28 | 0.012 | SPPFKSPLFFGK   | Phospho (ST) | 0.0000001000000.0 | Synth_pep_425V.1223.1223.2.dta           |
| GPSGXVSAQXLR 9 5 3 1 1908  | 1 | 482.9063 | 1445.697 | 3 | 26.66 | 0.012 | GPSGVVSAQQLFK  | Phospho (ST) | 0.0000001000000.0 | AIC_synth_45.1788.1788.3.dta             |
| GPSGXVSAQXLR 9 3 1 1 1864  | 1 | 724.8267 | 1447.639 | 2 | 26.89 | 0.012 | GPSGVVSAQQLDK  | Phospho (ST) | 0.0000001000000.0 | Synth_pep_325V.1130.1130.2.dta           |
| GPSGXVSAQXLR 8 7 3 0 1747  | 1 | 699.8391 | 1397.664 | 2 | 28.27 | 0.012 | GPSGVVSTAQLFR  | Phospho (ST) | 0.0000001000000.0 | Synth_pep_325V.1337.1337.2.dta           |
| SXPFKXSPFXFGR 9 9 3 0 1987 | 1 | 844.8986 | 1687.783 | 2 | 21.13 | 0.012 | SYPFKYSPLFFGR  | Phospho (ST) | 0.0000001000000.0 | AIC_synth_test_25.1649.1649.2.dta        |
| SXPFKXSPFXFGR 3 8 5 1 772  | 1 | 516.2759 | 1545.806 | 3 | 19.34 | 0.012 | SFPFKYSPLVFGK  | Phospho (ST) | 0.0000001000000.0 | Synth_pep_425V.1310.1310.3.dta           |
| SXPFKXSPFXFGR 4 4 4 0 889  | 1 | 462.8888 | 1385.645 | 3 | 27.65 | 0.012 | SGPFKYSPLVFGK  | Phospho (ST) | 0.0000001000000.0 | AIC_synth_test_45.1012.1012.3.dta        |
| SXPFKXSPFXFGR 8 8 2 1 1766 | 1 | 505.5944 | 1513.761 | 3 | 26.26 | 0.012 | SDFPKYSPLFEGK  | Phospho (ST) | 0.0000001000000.0 | Synth_pep_375V.1067.1067.3.dta           |
| SXPFKXSPFXFGR 0 8 6 1 174  | 1 | 482.2456 | 1443.715 | 3 | 26.88 | 0.012 | SAPFKYSPLSFGK  | Phospho (ST) | 0.0000001000000.0 | AIC_synth_45.1229.1229.3.dta             |
| SXPFKXSPFXFGR 5 3 5 0 1071 | 1 | 530.2797 | 1587.817 | 3 | 19.36 | 0.012 | SLPFKESPLFGR   | Phospho (ST) | 0.0000001000000.0 | AIC_synth_45.1772.1772.3.dta             |
| SXPFKXSPFXFGR 5 1 5 0 1031 | 1 | 778.8979 | 1555.781 | 2 | 24.85 | 0.012 | SLPFKDSPLFGR   | Phospho (ST) | 0.0000001000000.0 | AIC_synth_test_25.1521.1521.2.dta        |
| GPSGXVSAQXLR 5 3 5 0 1071  | 1 | 712.8696 | 1423.725 | 2 | 19.5  | 0.011 | GPSGLVSAQQLLR  | Phospho (ST) | 0.0000001000000.0 | Synth_pep_325V.1344.1344.2.dta           |
| SXPFKXSPFXFGR 9 6 9 1 1940 | 1 | 800.8755 | 1599.736 | 2 | 23.55 | 0.011 | SPPFKYSPLVFGK  | Phospho (ST) | 0.0000001000000.0 | Synth_pep_275V.1060.1060.2.dta           |
| SXPFKXSPFXFGR 3 6 3 1 728  | 1 | 784.8804 | 1567.746 | 2 | 23.96 | 0.011 | SFPFKSPLFFGK   | Phospho (ST) | 0.0000001000000.0 | Synth_pep_425V.1109.1109.2.dta           |
| SXPFKXSPFXFGR 9 7 2 0 1945 | 1 | 804.8766 | 1607.739 | 2 | 25.81 | 0.011 | SYPFKSPLFEGR   | Phospho (ST) | 0.0000001000000.0 | Synth_pep_275V.1084.1084.2.dta           |
| SXPFKXSPFXFGR 9 6 9 0 1939 | 1 | 814.8783 | 1627.742 | 2 | 24.52 | 0.011 | SYPFKSPLVFGK   | Phospho (ST) | 0.0000001000000.0 | AIC_synth_test_25.1429.1429.2.dta        |
| SXPFKXSPFXFGR 2 0 3 1 408  | 1 | 512.2476 | 1533.721 | 3 | 25.81 | 0.011 | SEFPKESPLFFGK  | Phospho (ST) | 0.0000001000000.0 | Synth_pep_40V.1055.1055.3.dta            |
| SXPFKXSPFXFGR 5 6 5 0 1131 | 1 | 764.9    |          |   |       |       |                |              |                   |                                          |

|                            |   |          |          |   |       |        |                |              |                   |                                            |
|----------------------------|---|----------|----------|---|-------|--------|----------------|--------------|-------------------|--------------------------------------------|
| SXPFKXSPLXFRG 7 8 0 0 1561 | 1 | 743.8749 | 1485.735 | 2 | 26.89 | 0.0095 | STPFKVSPLAFGR  | Phospho (ST) | 0.0000001000000.0 | Synth_pep_275V.1216.1216.2.dta             |
| GPSGVXSQAQLXR 9 7 9 1 1960 | 1 | 725.8342 | 1449.654 | 2 | 31.93 | 0.0095 | GPSGVVSTAQLYK  | Phospho (ST) | 0.0000001000000.0 | Synth_pep_275V.956.956.2.dta               |
| SXPFKXSPLXFRG 6 6 9 1 1340 | 1 | 762.8627 | 1523.711 | 2 | 26.69 | 0.0093 | SXPFKSSPLVYFK  | Phospho (ST) | 0.0000001000000.0 | AIC_synth_test_25.1137.1137.2.dta          |
| GPSGVXSQAQLXR 0 4 3 1 188  | 1 | 649.8105 | 1297.606 | 2 | 28.53 | 0.0093 | GPSGVVSGAQLFK  | Phospho (ST) | 0.0000001000000.0 | Synth_pep_325V.1065.1065.2.dta             |
| GPSGVXSQAQLXR 6 0 7 0 1215 | 1 | 655.8067 | 1309.599 | 2 | 21.6  | 0.0093 | GPSGVVSAQLTR   | Phospho (ST) | 0.0000001000000.0 | AIC_synth_test_25.807.807.2.dta            |
| SXPFKXSPLXFRG 3 3 3 1 628  | 1 | 532.9202 | 1595.739 | 3 | 22.52 | 0.0092 | SXPFKSSPLFFGK  | Phospho (ST) | 0.0000001000000.0 | Synth_pep_40V.1162.1162.3.dta              |
| GPSGVXSQAQLXR 3 0 9 1 620  | 1 | 702.8334 | 1403.652 | 2 | 29.55 | 0.0092 | GPSGVVSAQLYK   | Phospho (ST) | 0.0000001000000.0 | AIC_synth_test_25.1394.1394.2.dta          |
| GPSGVXSQAQLXR 8 8 1 0 1763 | 1 | 682.8342 | 1363.654 | 2 | 27.19 | 0.0092 | GPSGVVSAQDLR   | Phospho (ST) | 0.0000001000000.0 | AIC_synth_test_25.1201.1201.2.dta          |
| GPSGVXSQAQLXR 3 4 9 1 700  | 1 | 695.8227 | 1389.631 | 2 | 28.2  | 0.0091 | GPSGVVSGAQLYK  | Phospho (ST) | 0.0000001000000.0 | Synth_pep_30V_120502214048.1019.1019.2.dta |
| GPSGVXSQAQLXR 1 5 5 0 311  | 1 | 464.9009 | 1391.681 | 3 | 27.87 | 0.009  | GPSGVVSLAQLLR  | Phospho (ST) | 0.0000001000000.0 | Synth_pep_40V.1210.1210.3.dta              |
| GPSGVXSQAQLXR 3 6 9 0 739  | 1 | 724.8301 | 1447.646 | 2 | 29.42 | 0.009  | GPSGVVSSAQLYR  | Phospho (ST) | 0.0000001000000.0 | AIC_synth_test_25.1301.1301.2.dta          |
| SXPFKXSPLXFRG 4 4 4 0 889  | 1 | 693.8322 | 1385.65  | 2 | 28.33 | 0.009  | SGPFKSSPLGFR   | Phospho (ST) | 0.0000001000000.0 | Synth_pep_275V.939.939.2.dta               |
| SXPFKXSPLXFRG 1 5 3 0 307  | 1 | 795.892  | 1589.769 | 2 | 25.02 | 0.009  | SDFPKLSPLFFGR  | Phospho (ST) | 0.0000001000000.0 | AIC_synth_test_25.1882.1882.2.dta          |
| GPSGVXSQAQLXR 5 3 6 1 1074 | 1 | 457.5616 | 1369.663 | 3 | 28.07 | 0.009  | GPSGVVSAQLSK   | Phospho (ST) | 0.0000001000000.0 | Synth_pep_40V.1140.1140.3.dta              |
| SXPFKXSPLXFRG 1 5 7 0 315  | 1 | 772.8792 | 1543.744 | 2 | 28.02 | 0.009  | SDFPKLSPLTFR   | Phospho (ST) | 0.0000001000000.0 | AIC_synth_test_25.1578.1578.2.dta          |
| SXPFKXSPLXFRG 5 2 9 1 1060 | 1 | 796.894  | 1591.774 | 2 | 24.41 | 0.0089 | SDFPKKSSPLVYFK | Phospho (ST) | 0.0000001000000.0 | AIC_synth_test_25.1375.1375.2.dta          |
| SXPFKXSPLXFRG 4 6 0 1 922  | 1 | 701.8423 | 1401.67  | 2 | 30.31 | 0.0087 | SGPFKSSPLAFGK  | Phospho (ST) | 0.0000001000000.0 | Synth_pep_425V.870.870.2.dta               |
| GPSGVXSQAQLXR 1 4 3 1 288  | 1 | 671.805  | 1341.595 | 2 | 29.28 | 0.0087 | GPSGVVSGAQLFK  | Phospho (ST) | 0.0000001000000.0 | Synth_pep_275V.1021.1021.2.dta             |
| SXPFKXSPLXFRG 9 5 4 0 1909 | 1 | 774.8865 | 1547.759 | 2 | 25.66 | 0.0086 | SXPFKSSPLGFR   | Phospho (ST) | 0.0000001000000.0 | AIC_synth_test_25.1607.1607.2.dta          |
| SXPFKXSPLXFRG 3 1 2 1 626  | 1 | 526.9102 | 1577.709 | 3 | 26.03 | 0.0086 | SXPFKSSPLFFGK  | Phospho (ST) | 0.0000001000000.0 | AIC_synth_test_45.1341.1341.3.dta          |
| GPSGVXSQAQLXR 3 3 5 0 671  | 1 | 486.9083 | 1457.703 | 3 | 24.02 | 0.0085 | GPSGVVSAQLLR   | Phospho (ST) | 0.0000001000000.0 | Synth_pep_40V.1404.1404.3.dta              |
| SXPFKXSPLXFRG 0 2 9 0 59   | 1 | 789.8719 | 1577.729 | 2 | 28.85 | 0.0085 | SAPFKKSSPLVYFK | Phospho (ST) | 0.0000001000000.0 | AIC_synth_test_25.1191.1191.2.dta          |
| SXPFKXSPLXFRG 5 3 3 0 1067 | 1 | 541.6105 | 1621.81  | 3 | 21.52 | 0.0085 | SDFPKSSPLFFGR  | Phospho (ST) | 0.0000001000000.0 | AIC_synth_test_45.1804.1804.3.dta          |
| GPSGVXSQAQLXR 8 9 8 0 1797 | 1 | 706.8492 | 1411.684 | 2 | 26.31 | 0.0084 | GPSGVVSAQLVR   | Phospho (ST) | 0.0000001000000.0 | Synth_pep_35V.1165.1165.2.dta              |
| GPSGVXSQAQLXR 9 6 7 1 1936 | 1 | 687.8179 | 1373.621 | 2 | 33.01 | 0.0084 | GPSGVVSSAQLTK  | Phospho (ST) | 0.0000001000000.0 | Synth_pep_30V_120502214048.801.801.2.dta   |
| GPSGVXSQAQLXR 5 1 6 0 1033 | 1 | 456.2174 | 1365.631 | 3 | 27.62 | 0.0083 | GPSGVVSDAQLSR  | Phospho (ST) | 0.0000001000000.0 | AIC_synth_test_45.989.989.3.dta            |
| GPSGVXSQAQLXR 3 3 9 1 680  | 1 | 740.8475 | 1479.68  | 2 | 30.74 | 0.0083 | GPSGVVSAQLYK   | Phospho (ST) | 0.0000001000000.0 | Synth_pep_35V.1282.1282.2.dta              |
| SXPFKXSPLXFRG 2 4 7 1 496  | 1 | 492.2366 | 1473.688 | 3 | 28.91 | 0.0083 | SEPFKSSPLTFGK  | Phospho (ST) | 0.0000001000000.0 | Synth_pep_425V.890.890.3.dta               |
| GPSGVXSQAQLXR 3 1 2 0 625  | 1 | 721.8164 | 1441.618 | 2 | 24.23 | 0.0083 | GPSGVVSDAQLER  | Phospho (ST) | 0.0000001000000.0 | Synth_pep_35V.949.949.2.dta                |
| GPSGVXSQAQLXR 3 9 5 0 791  | 1 | 737.8583 | 1473.702 | 2 | 25.92 | 0.0081 | GPSGVVSAQLLR   | Phospho (ST) | 0.0000001000000.0 | Synth_pep_275V.1389.1389.2.dta             |
| SXPFKXSPLXFRG 9 6 9 1 1940 | 1 | 800.8744 | 1599.734 | 2 | 23.15 | 0.008  | SXPFKSSPLVYFK  | Phospho (ST) | 0.0000001000000.0 | Synth_pep_425V.983.983.2.dta               |
| SXPFKXSPLXFRG 3 3 0 0 661  | 1 | 527.5928 | 1579.573 | 3 | 21.93 | 0.008  | SXPFKSSPLAFGR  | Phospho (ST) | 0.0000001000000.0 | Synth_pep_40V.1263.1263.3.dta              |
| GPSGVXSQAQLXR 6 8 0 0 1362 | 1 | 640.8184 | 1279.622 | 2 | 26.53 | 0.008  | GPSGVVSAQLAK   | Phospho (ST) | 0.0000001000000.0 | Synth_pep_35V.917.917.2.dta                |
| SXPFKXSPLXFRG 9 4 1 1 1884 | 1 | 761.8539 | 1521.693 | 2 | 30.31 | 0.008  | SXPFKSSPLDFGK  | Phospho (ST) | 0.0000001000000.0 | Synth_pep_30V_120502214048.1003.1003.2.dta |
| GPSGVXSQAQLXR 0 5 3 1 108  | 1 | 452.2304 | 1353.669 | 3 | 29.32 | 0.0079 | SDFPKSSPLAFK   | Phospho (ST) | 0.0000001000000.0 | AIC_synth_test_45.1680.1680.3.dta          |
| SXPFKXSPLXFRG 0 8 1 0 163  | 1 | 750.8658 | 1499.717 | 2 | 29.11 | 0.0079 | SAPFKKSSPLDFGR | Phospho (ST) | 0.0000001000000.0 | Synth_pep_275V.1152.1152.2.dta             |
| SXPFKXSPLXFRG 9 9 9 0 1999 | 1 | 568.9321 | 1703.774 | 3 | 21.02 | 0.0079 | SXPFKSSPLVYFK  | Phospho (ST) | 0.0000001000000.0 | Synth_pep_425V.1093.1093.3.dta             |
| SXPFKXSPLXFRG 1 8 3 1 368  | 1 | 516.9222 | 1547.745 | 3 | 26.15 | 0.0079 | SDFPKSSPLFFGK  | Phospho (ST) | 0.0000001000000.0 | AIC_synth_test_45.1564.1564.3.dta          |
| GPSGVXSQAQLXR 7 9 3 1 1588 | 1 | 717.837  | 1433.659 | 2 | 31.45 | 0.0079 | GPSGVVSAQLFK   | Phospho (ST) | 0.0000001000000.0 | Synth_pep_375V.1115.1115.2.dta             |
| SXPFKXSPLXFRG 4 4 2 1 886  | 1 | 715.8416 | 1429.669 | 2 | 29.57 | 0.0078 | SGPFKSSPLFFGK  | Phospho (ST) | 0.0000001000000.0 | AIC_synth_test_25.1087.1087.2.dta          |
| GPSGVXSQAQLXR 0 9 3 1 188  | 1 | 702.8318 | 1403.649 | 2 | 30.86 | 0.0078 | GPSGVVSAQLFK   | Phospho (ST) | 0.0000001000000.0 | Synth_pep_35V.1177.1177.2.dta              |
| SXPFKXSPLXFRG 5 7 2 0 1145 | 1 | 779.889  | 1557.763 | 2 | 28.04 | 0.0078 | SDFPKSSPLFFGR  | Phospho (ST) | 0.0000001000000.0 | Synth_pep_275V.1150.1150.2.dta             |
| GPSGVXSQAQLXR 6 8 3 1 1368 | 1 | 452.8902 | 1355.649 | 3 | 28.92 | 0.0077 | GPSGVVSAQLFK   | Phospho (ST) | 0.0000001000000.0 | Synth_pep_425V.957.957.3.dta               |
| SXPFKXSPLXFRG 7 0 2 0 1405 | 1 | 758.8632 | 1515.712 | 2 | 28.7  | 0.0077 | STPFKSSPLFFGR  | Phospho (ST) | 0.0000001000000.0 | Synth_pep_325V.957.957.2.dta               |
| SXPFKXSPLXFRG 5 5 5 1 1112 | 1 | 763.9246 | 1525.835 | 2 | 21.21 | 0.0076 | SDFPKSSPLFFGK  | Phospho (ST) | 0.0000001000000.0 | AIC_synth_test_25.1895.1895.5.dta          |
| SXPFKXSPLXFRG 3 8 9 1 780  | 1 | 798.8987 | 1595.783 | 2 | 22.93 | 0.0076 | SXPFKSSPLVYFK  | Phospho (ST) | 0.0000001000000.0 | Synth_pep_425V.1188.1188.2.dta             |
| GPSGVXSQAQLXR 9 1 9 1 1840 | 1 | 732.8246 | 1463.635 | 2 | 28.43 | 0.0075 | GPSGVVSTAQLYK  | Phospho (ST) | 0.0000001000000.0 | Synth_pep_30V_120502214048.946.946.2.dta   |
| GPSGVXSQAQLXR 8 4 7 0 1695 | 1 | 654.8173 | 1307.62  | 2 | 26.62 | 0.0075 | GPSGVVSGAQLTR  | Phospho (ST) | 0.0000001000000.0 | AIC_synth_test_25.872.872.2.dta            |
| GPSGVXSQAQLXR 4 4 1 1 884  | 1 | 626.782  | 1251.549 | 2 | 25.1  | 0.0074 | GPSGVVSGAQLDK  | Phospho (ST) | 0.0000001000000.0 | Synth_pep_325V.728.728.2.dta               |
| SXPFKXSPLXFRG 1 0 7 0 215  | 1 | 501.5707 | 1501.69  | 3 | 30.84 | 0.0074 | SDFPKKASPLTFR  | Phospho (ST) | 0.0000001000000.0 | Synth_pep_40V.968.968.3.dta                |
| SXPFKXSPLXFRG 3 9 5 1 792  | 1 | 537.6068 | 1609.798 | 3 | 21.58 | 0.0073 | SXPFKSSPLFFGK  | Phospho (ST) | 0.0000001000000.0 | AIC_synth_test_45.1620.1620.3.dta          |
| GPSGVXSQAQLXR 9 0 8 1 1818 | 1 | 452.8896 | 1355.647 | 3 | 29.12 | 0.0073 | GPSGVVSAQLYK   | Phospho (ST) | 0.0000001000000.0 | Synth_pep_40V.939.939.3.dta                |
| SXPFKXSPLXFRG 9 9 9 1 2000 | 1 | 838.8912 | 1675.768 | 2 | 24    | 0.0072 | SXPFKSSPLVYFK  | Phospho (ST) | 0.0000001000000.0 | Synth_pep_275V.1197.1197.2.dta             |
| GPSGVXSQAQLXR 5 6 3 1 1128 | 1 | 685.8403 | 1369.666 | 2 | 28.56 | 0.0072 | GPSGVVSAQLFK   | Phospho (ST) | 0.0000001000000.0 | AIC_synth_test_25.1524.1524.2.dta          |
| GPSGVXSQAQLXR 0 4 3 1 88   | 1 | 649.8108 | 1297.607 | 2 | 29.69 | 0.0071 | GPSGVVSGAQLFK  | Phospho (ST) | 0.0000001000000.0 | Synth_pep_325V.994.994.2.dta               |
| SXPFKXSPLXFRG 9 0 9 1 1820 | 1 | 792.8779 | 1583.743 | 2 | 27.96 | 0.007  | SXPFKSSPLVYFK  | Phospho (ST) | 0.0000001000000.0 | AIC_synth_test_25.1343.1343.2.dta          |
| SXPFKXSPLXFRG 9 7 2 0 1945 | 1 | 804.8775 | 1607.741 | 2 | 27.91 | 0.007  | SDFPKSSPLFFGR  | Phospho (ST) | 0.0000001000000.0 | AIC_synth_test_25.1303.1303.2.dta          |
| GPSGVXSQAQLXR 1 1 9 0 239  | 1 | 482.2102 | 1443.609 | 3 | 28.04 | 0.0069 | GPSGVVSDAQLYR  | Phospho (ST) | 0.0000001000000.0 | AIC_synth_test_45.878.878.3.dta            |
| SXPFKXSPLXFRG 9 1 9 0 1839 | 1 | 828.8768 | 1655.739 | 2 | 25.48 | 0.0069 | SDFPKSSPLVYFK  | Phospho (ST) | 0.0000001000000.0 | Synth_pep_275V.1208.1208.2.dta             |
| SXPFKXSPLXFRG 3 3 9 0 679  | 1 | 558.2689 | 1671.785 | 3 | 24.52 | 0.0069 | SXPFKSSPLVYFK  | Phospho (ST) | 0.0000001000000.0 | Synth_pep_425V.1290.1290.3.dta             |
| SXPFKXSPLXFRG 1 9 2 0 385  | 1 | 541.5798 | 1621.718 | 3 | 26.7  | 0.0068 | SDFPKSSPLFFGR  | Phospho (ST) | 0.0000001000000.0 | AIC_synth_test_45.1309.1309.3.dta          |
| GPSGVXSQAQLXR 2 5 0 1 502  | 1 | 446.2214 | 1335.642 | 3 | 29.32 | 0.0068 | GPSGVVSAQLAK   | Phospho (ST) | 0.0000001000000.0 | Synth_pep_425V.975.975.3.dta               |
| SXPFKXSPLXFRG 9 2 3 1 1848 | 1 | 542.9246 | 1625.752 | 3 | 22.46 | 0.0068 | SXPFKSSPLFFGK  | Phospho (ST) | 0.0000001000000.0 | AIC_synth_test_45.1495.1495.3.dta          |
| SXPFKXSPLXFRG 8 5 4 1 1710 | 1 | 728.884  | 1455.754 | 2 | 28.3  | 0.0067 | SDFPKSSPLFFGK  | Phospho (ST) | 0.0000001000000.0 | Synth_pep_275V.1250.1250.2.dta             |
| SXPFKXSPLXFRG 1 3 6 0 273  | 1 | 522.2443 | 1563.711 | 3 | 29.39 | 0.0067 | SDFPKSSPLDFGR  | Phospho (ST) | 0.0000001000000.0 | AIC_synth_test_45.1543.1543.3.dta          |
| SXPFKXSPLXFRG 0 8 1 0 163  | 1 | 750.8651 | 1499.716 | 2 | 30.48 | 0.0066 | SAPFKKSSPLDFGR | Phospho (ST) | 0.0000001000000.0 | AIC_synth_test_25.1415.1415.2.dta          |
| SXPFKXSPLXFRG 3 9 1 1 784  | 1 | 806.8797 | 1611.745 | 2 | 27.88 | 0.0066 | SXPFKSSPLDFGK  | Phospho (ST) | 0.0000001000000.0 | Synth_pep_275V.1297.1297.2.dta             |
| GPSGVXSQAQLXR 5 3 4 1 1070 | 1 | 670.8344 | 1339.654 | 2 | 31.32 | 0.0066 | GPSGVVSAQLGK   | Phospho (ST) | 0.0000001000000.0 | Synth_pep_275V.1282.1282.2.dta             |
| GPSGVXSQAQLXR 6 8 5 1 1372 | 1 | 661.8383 | 1321.662 | 2 | 32.85 | 0.0065 | GPSGVVSAQLLK   | Phospho (ST) | 0.0000001000000.0 | Synth_pep_275V.1196.1196.2.dta             |
| SXPFKXSPLXFRG 4 0 0 1 802  | 1 | 693.8463 | 1385.678 | 2 | 26.24 | 0.0064 | SGPFKSSPLAFGK  | Phospho (ST) | 0.0000001000000.0 | AIC_synth_test_25.1152.1152.2.dta          |
| GPSGVXSQAQLXR 3 3 3 0 667  | 1 | 746.8554 | 1491.696 | 2 | 25.45 | 0.0064 | GPSGVVSAQLFR   | Phospho (ST) | 0.0000001000000.0 | AIC_synth_test_25.2147.2147.2.dta          |
| SXPFKXSPLXFRG 7 1 2 0 1425 | 1 | 780.8583 | 1559.702 | 2 | 28.94 | 0.0063 | STPFKSSPLFFGR  | Phospho (ST) | 0.0000001000000.0 | Synth_pep_325V.947.947.2.dta               |
| SXPFKXSPLXFRG 0 6 8 1 138  | 1 | 722.8689 | 1443.723 | 2 | 27.87 | 0.0063 | SAPFKKSSPLVYFK | Phospho (ST) | 0.0000001000000.0 | AIC_synth_test_25.1211.1211.2.dta          |
| GPSGVXSQAQLXR 8 9 7 1 1796 | 1 | 693.8376 | 1385.661 | 2 | 32.56 | 0.0063 | GPSGVVSAQLTK   | Phospho (ST) | 0.0000001000000.0 | Synth_pep_375V.954.954.2.dta               |
| SXPFKXSPLXFRG 8 9 8 1 1798 | 1 | 516.9352 | 1547.784 | 3 | 26.06 | 0.0062 | SXPFKSSPLVYFK  | Phospho (ST) | 0.0000001000000.0 | Synth_pep_40V.1069.1069.3.dta              |
| GPSGVXSQAQLXR 3 9 0 0 781  | 1 | 478.226  | 1431.656 | 3 | 29.29 | 0.0062 | GPSGVVSAQLAR   | Phospho (ST) | 0.0000001000000.0 | AIC_synth_test_45.1329.1329.3.dta          |
| SXPFKXSPLXFRG 4 6 9 0 939  | 1 | 761.8591 | 1521.704 | 2 | 27.66 | 0.0062 | SDFPKSSPLVYFK  | Phospho (ST) | 0.0000001000000.0 | AIC_synth_test_25.1184.1184.2.dta          |
| GPSGVXSQAQLXR 5 9 7 1 1196 | 1 | 700.8448 | 1399.675 | 2 | 33.6  | 0.0062 | GPSGVVSAQLTK   | Phospho (ST) | 0.0000001000000.0 | Synth_pep_35V.                             |

|               |         |      |   |          |          |   |       |        |                |              |                   |                                            |
|---------------|---------|------|---|----------|----------|---|-------|--------|----------------|--------------|-------------------|--------------------------------------------|
| GPSGVXSQAQLXR | 1 0 7 0 | 215  | 1 | 446.8741 | 1337.601 | 3 | 29.49 | 0.0054 | GPSGDVSAQAQLTR | Phospho (ST) | 0.0000001000000.0 | AIC_synth_45.765.765.3.dta                 |
| GPSGVXSQAQLXR | 0 3 1 1 | 164  | 2 | 678.8139 | 1355.613 | 2 | 32.66 | 0.0054 | GPSGAVSFAQLDK  | Phospho (ST) | 0.0000001000000.0 | Synth_pep_325V.1040.1040.2.dta             |
| GPSGVXSQAQLXR | 2 3 1 1 | 1464 | 2 | 707.8154 | 1413.616 | 2 | 29.56 | 0.0054 | GPSGEVSAFAQLDK | Phospho (ST) | 0.0000001000000.0 | Synth_pep_325V.1024.1024.2.dta             |
| GPSGVXSQAQLXR | 9 3 4 1 | 1870 | 2 | 695.8226 | 1389.631 | 2 | 30.45 | 0.0054 | GPSGVVSAFAQLDK | Phospho (ST) | 0.0000001000000.0 | Synth_pep_30V_120502214048.1121.1121.2.dta |
| SXPFKXSPFLXFR | 5 3 8 0 | 1077 | 2 | 787.9109 | 1573.807 | 2 | 22.79 | 0.0053 | SLPFKSPFLVFR   | Phospho (ST) | 0.0000001000000.0 | Synth_pep_275V.1441.1441.2.dta             |
| SXPFKXSPFLXFR | 4 6 1 1 | 1924 | 3 | 482.8939 | 1445.666 | 3 | 31.21 | 0.0053 | SGPFKSPFLDFGK  | Phospho (ST) | 0.0000001000000.0 | Synth_pep_375V.918.918.3.dta               |
| SXPFKXSPFLXFR | 5 0 8 1 | 1018 | 2 | 735.8923 | 1469.77  | 2 | 27.75 | 0.0053 | SLPFKASPLVFR   | Phospho (ST) | 0.0000001000000.0 | Synth_pep_275V.1176.1176.2.dta             |
| SXPFKXSPFLXFR | 9 1 9 0 | 1839 | 2 | 828.8762 | 1655.738 | 2 | 26.75 | 0.0052 | SYPFKASPLVFR   | Phospho (ST) | 0.0000001000000.0 | Synth_pep_275V.1116.1116.2.dta             |
| GPSGVXSQAQLXR | 2 3 9 1 | 1480 | 2 | 731.8314 | 1461.648 | 2 | 28.05 | 0.0052 | GPSGEVSAFAQLYK | Phospho (ST) | 0.0000001000000.0 | Synth_pep_35V.1163.1163.2.dta              |
| GPSGVXSQAQLXR | 1 3 1 0 | 263  | 2 | 714.8107 | 1427.607 | 2 | 25.29 | 0.0052 | GPSGDVSAFAQLDR | Phospho (ST) | 0.0000001000000.0 | Synth_pep_275V.1053.1053.2.dta             |
| GPSGVXSQAQLXR | 9 8 6 1 | 1974 | 2 | 686.8287 | 1371.643 | 2 | 33.06 | 0.0052 | GPSGVVSAFAQLSK | Phospho (ST) | 0.0000001000000.0 | Synth_pep_30V_120502214048.952.952.2.dta   |
| SXPFKXSPFLXFR | 8 0 9 1 | 1620 | 3 | 507.5905 | 1519.75  | 3 | 29.23 | 0.0051 | SVPFKASPLVFR   | Phospho (ST) | 0.0000001000000.0 | Synth_pep_375V.1011.1011.3.dta             |
| SXPFKXSPFLXFR | 7 8 1 0 | 1563 | 2 | 765.8693 | 1529.724 | 2 | 31.56 | 0.0051 | STPFKASPLDFGR  | Phospho (ST) | 0.0000001000000.0 | Synth_pep_30V_120502214048.1114.1114.2.dta |
| GPSGVXSQAQLXR | 9 2 4 0 | 1849 | 3 | 467.5445 | 1399.612 | 3 | 30.66 | 0.0051 | GPSGVVSAQAQLGR | Phospho (ST) | 0.0000001000000.0 | Synth_pep_425V.810.810.3.dta               |
| GPSGVXSQAQLXR | 8 5 3 1 | 1708 | 3 | 461.5757 | 1381.705 | 3 | 28.51 | 0.0051 | GPSGVVSAQAQLFK | Phospho (ST) | 0.0000001000000.0 | AIC_synth_45.1821.1821.3.dta               |
| SXPFKXSPFLXFR | 9 4 9 1 | 1900 | 3 | 524.2484 | 1569.723 | 3 | 31    | 0.0051 | SYPFKASPLVFR   | Phospho (ST) | 0.0000001000000.0 | Synth_pep_40V.979.979.3.dta                |
| GPSGVXSQAQLXR | 1 5 3 1 | 308  | 2 | 699.8378 | 1397.661 | 2 | 30.26 | 0.0051 | GPSGDVSAQAQLFK | Phospho (ST) | 0.0000001000000.0 | Synth_pep_375V.1261.1261.2.dta             |
| GPSGVXSQAQLXR | 1 1 1 1 | 224  | 2 | 684.7864 | 1367.558 | 2 | 33.41 | 0.0051 | GPSGDVSDAQLDK  | Phospho (ST) | 0.0000001000000.0 | Synth_pep_275V.746.746.2.dta               |
| GPSGVXSQAQLXR | 1 0 7 0 | 215  | 2 | 669.804  | 1337.593 | 2 | 27.53 | 0.005  | GPSGDVSAQAQLTR | Phospho (ST) | 0.0000001000000.0 | Synth_pep_30V_120502214048.709.709.2.dta   |
| GPSGVXSQAQLXR | 0 6 9 1 | 140  | 2 | 672.8132 | 1343.612 | 2 | 34.23 | 0.005  | GPSGAVSSAQLYK  | Phospho (ST) | 0.0000001000000.0 | Synth_pep_30V_120502214048.793.793.2.dta   |
| SXPFKXSPFLXFR | 6 5 6 0 | 1313 | 2 | 751.8726 | 1501.731 | 2 | 26.24 | 0.005  | SSPFKASPLDFGR  | Phospho (ST) | 0.0000001000000.0 | Synth_pep_30V_120502214048.1168.1168.2.dta |
| SXPFKXSPFLXFR | 4 1 1 1 | 824  | 2 | 737.8339 | 1473.653 | 2 | 29.35 | 0.0049 | SGPFKASPLDFGK  | Phospho (ST) | 0.0000001000000.0 | AIC_synth_test_25.1183.1183.2.dta          |
| GPSGVXSQAQLXR | 7 9 9 1 | 1600 | 2 | 725.834  | 1449.654 | 2 | 34.83 | 0.0049 | GPSGVVSYAQLYK  | Phospho (ST) | 0.0000001000000.0 | Synth_pep_30V_120502214048.1283.1283.2.dta |
| GPSGVXSQAQLXR | 0 8 5 1 | 172  | 2 | 653.8427 | 1305.671 | 2 | 29.57 | 0.0048 | GPSGAVSVAQLLK  | Phospho (ST) | 0.0000001000000.0 | AIC_synth_test_25.1528.1528.2.dta          |
| SXPFKXSPFLXFR | 4 2 9 0 | 859  | 3 | 522.2444 | 1563.711 | 3 | 30.83 | 0.0048 | SGPFKASPLVFR   | Phospho (ST) | 0.0000001000000.0 | AIC_synth_45.1236.1236.3.dta               |
| GPSGVXSQAQLXR | 0 8 3 1 | 168  | 2 | 670.836  | 1339.657 | 2 | 30.47 | 0.0048 | GPSGAVSVAQLFK  | Phospho (ST) | 0.0000001000000.0 | Synth_pep_325V.1284.1284.2.dta             |
| SXPFKXSPFLXFR | 0 5 3 1 | 108  | 3 | 506.9306 | 1517.77  | 3 | 25.38 | 0.0048 | SAPFKASPLFFGK  | Phospho (ST) | 0.0000001000000.0 | Synth_pep_375V.1232.1232.3.dta             |
| SXPFKXSPFLXFR | 6 6 2 0 | 1325 | 2 | 759.8531 | 1517.692 | 2 | 28.2  | 0.0048 | SGPFKASPLFFGR  | Phospho (ST) | 0.0000001000000.0 | Synth_pep_275V.952.952.2.dta               |
| GPSGVXSQAQLXR | 9 4 4 1 | 1890 | 2 | 650.8007 | 1299.587 | 2 | 31.78 | 0.0048 | GPSGVVSGAQLGK  | Phospho (ST) | 0.0000001000000.0 | Synth_pep_325V.792.792.2.dta               |
| GPSGVXSQAQLXR | 8 9 9 1 | 1800 | 2 | 724.8452 | 1447.676 | 2 | 33.54 | 0.0048 | GPSGVVSYAQLYK  | Phospho (ST) | 0.0000001000000.0 | Synth_pep_325V.1056.1056.2.dta             |
| GPSGVXSQAQLXR | 1 2 9 1 | 260  | 3 | 477.545  | 1429.613 | 3 | 28.59 | 0.0048 | GPSGDVSEAQLYK  | Phospho (ST) | 0.0000001000000.0 | Synth_pep_40V.818.818.3.dta                |
| SXPFKXSPFLXFR | 7 8 6 1 | 1574 | 3 | 492.2486 | 1473.724 | 3 | 29.98 | 0.0048 | STPFKASPLSFGK  | Phospho (ST) | 0.0000001000000.0 | AIC_synth_45.1364.1364.3.dta               |
| GPSGVXSQAQLXR | 3 7 9 1 | 760  | 2 | 717.8383 | 1433.662 | 2 | 34.12 | 0.0048 | GPSGVVSTYAQLYK | Phospho (ST) | 0.0000001000000.0 | Synth_pep_275V.1101.1101.2.dta             |
| GPSGVXSQAQLXR | 1 9 5 1 | 392  | 2 | 707.8343 | 1413.654 | 2 | 29.71 | 0.0048 | GPSGVVSAQAQLLK | Phospho (ST) | 0.0000001000000.0 | Synth_pep_30V_120502214048.1131.1131.2.dta |
| SXPFKXSPFLXFR | 6 5 5 1 | 1312 | 2 | 750.8952 | 1499.776 | 2 | 27.58 | 0.0047 | SSPFKASPLDFGK  | Phospho (ST) | 0.0000001000000.0 | Synth_pep_30V_120502214048.1283.1283.2.dta |
| SXPFKXSPFLXFR | 5 0 8 0 | 1017 | 2 | 749.8955 | 1497.777 | 2 | 25    | 0.0047 | SLPFKASPLVFR   | Phospho (ST) | 0.0000001000000.0 | AIC_synth_test_25.1479.1479.2.dta          |
| GPSGVXSQAQLXR | 3 9 3 0 | 787  | 3 | 503.5695 | 1507.687 | 3 | 29.34 | 0.0047 | GPSGFVSYAQLFR  | Phospho (ST) | 0.0000001000000.0 | AIC_synth_45.1743.1743.3.dta               |
| SXPFKXSPFLXFR | 7 5 2 1 | 1506 | 2 | 765.8847 | 1529.755 | 2 | 25.46 | 0.0047 | STPFKASPLFFGK  | Phospho (ST) | 0.0000001000000.0 | AIC_synth_test_25.1506.1506.2.dta          |
| GPSGVXSQAQLXR | 6 9 3 1 | 1388 | 2 | 710.8278 | 1419.641 | 2 | 31.77 | 0.0047 | GPSGVVSYAQLFK  | Phospho (ST) | 0.0000001000000.0 | Synth_pep_30V_120502214048.1161.1161.2.dta |
| SXPFKXSPFLXFR | 4 4 2 0 | 885  | 3 | 486.8976 | 1457.671 | 3 | 30.56 | 0.0047 | SGPFKASPLFFGR  | Phospho (ST) | 0.0000001000000.0 | Synth_pep_375V.908.908.3.dta               |
| GPSGVXSQAQLXR | 9 5 9 1 | 1920 | 2 | 731.854  | 1461.694 | 2 | 31.51 | 0.0047 | GPSGVVSAQAQLYK | Phospho (ST) | 0.0000001000000.0 | Synth_pep_275V.1260.1260.2.dta             |
| SXPFKXSPFLXFR | 4 6 3 1 | 928  | 2 | 739.8585 | 1477.702 | 2 | 31.88 | 0.0046 | SGPFKASPLFFGK  | Phospho (ST) | 0.0000001000000.0 | AIC_synth_test_25.1336.1336.2.dta          |
| SXPFKXSPFLXFR | 2 3 9 0 | 479  | 3 | 552.2592 | 1653.756 | 3 | 26.93 | 0.0046 | SEPFKASPLVFR   | Phospho (ST) | 0.0000001000000.0 | AIC_synth_45.1525.1525.3.dta               |
| SXPFKXSPFLXFR | 9 0 2 0 | 1805 | 2 | 789.8691 | 1577.724 | 2 | 31.9  | 0.0046 | SYPFKASPLFFGR  | Phospho (ST) | 0.0000001000000.0 | Synth_pep_30V_120502214048.1043.1043.2.dta |
| GPSGVXSQAQLXR | 3 0 6 1 | 614  | 2 | 664.8161 | 1327.618 | 2 | 31.06 | 0.0046 | GPSGFVSAQAQLSK | Phospho (ST) | 0.0000001000000.0 | Synth_pep_30V.942.942.2.dta                |
| GPSGVXSQAQLXR | 8 5 5 1 | 1712 | 3 | 450.2462 | 1347.717 | 3 | 28.2  | 0.0045 | GPSGVVSAQAQLLK | Phospho (ST) | 0.0000001000000.0 | AIC_synth_45.1738.1738.3.dta               |
| GPSGVXSQAQLXR | 1 8 7 0 | 375  | 2 | 683.8185 | 1365.623 | 2 | 31.39 | 0.0045 | GPSGDVSAQAQLTR | Phospho (ST) | 0.0000001000000.0 | Synth_pep_325V.931.931.2.dta               |
| SXPFKXSPFLXFR | 8 9 2 0 | 1785 | 2 | 803.8875 | 1605.76  | 2 | 30.22 | 0.0045 | SVPFKASPLFFGR  | Phospho (ST) | 0.0000001000000.0 | Synth_pep_275V.1148.1148.2.dta             |
| SXPFKXSPFLXFR | 0 1 5 0 | 31   | 2 | 757.8716 | 1513.729 | 2 | 32.86 | 0.0045 | SAPFKASPLFFGR  | Phospho (ST) | 0.0000001000000.0 | Synth_pep_275V.1256.1256.2.dta             |
| SXPFKXSPFLXFR | 9 9 4 0 | 1989 | 2 | 799.8744 | 1597.734 | 2 | 25.65 | 0.0045 | SYPFKASPLFFGR  | Phospho (ST) | 0.0000001000000.0 | AIC_synth_test_25.1440.1440.2.dta          |
| SXPFKXSPFLXFR | 5 5 1 0 | 1103 | 2 | 778.8975 | 1555.781 | 2 | 29.11 | 0.0044 | SLPFKASPLDFGR  | Phospho (ST) | 0.0000001000000.0 | Synth_pep_275V.1394.1394.2.dta             |
| SXPFKXSPFLXFR | 2 6 9 0 | 539  | 2 | 797.8672 | 1593.72  | 2 | 31.06 | 0.0044 | SEPFKASPLVFR   | Phospho (ST) | 0.0000001000000.0 | AIC_synth_test_25.1180.1180.2.dta          |
| GPSGVXSQAQLXR | 3 4 6 0 | 693  | 2 | 671.8096 | 1341.605 | 2 | 30    | 0.0044 | GPSGVVSGAQLSR  | Phospho (ST) | 0.0000001000000.0 | AIC_synth_test_25.1064.1064.2.dta          |
| SXPFKXSPFLXFR | 5 5 5 0 | 1111 | 3 | 518.9541 | 1553.841 | 3 | 24.91 | 0.0044 | SLPFKASPLDFGR  | Phospho (ST) | 0.0000001000000.0 | AIC_synth_45.1764.1764.3.dta               |
| GPSGVXSQAQLXR | 3 8 3 0 | 767  | 3 | 482.2371 | 1443.69  | 3 | 29.6  | 0.0044 | GPSGFVSAQAQLFR | Phospho (ST) | 0.0000001000000.0 | Synth_pep_425V.1361.1361.3.dta             |
| GPSGVXSQAQLXR | 5 2 0 0 | 1041 | 3 | 455.557  | 1363.649 | 3 | 28.25 | 0.0044 | GPSGVVSEAQLAR  | Phospho (ST) | 0.0000001000000.0 | Synth_pep_425V.935.935.3.dta               |
| SXPFKXSPFLXFR | 3 5 3 0 | 707  | 3 | 541.6096 | 1621.807 | 3 | 24.66 | 0.0043 | SGPFKASPLFFGR  | Phospho (ST) | 0.0000001000000.0 | Synth_pep_425V.1369.1369.3.dta             |
| SXPFKXSPFLXFR | 0 9 9 1 | 1200 | 2 | 792.8786 | 1583.743 | 2 | 30.18 | 0.0042 | SAPFKASPLVFR   | Phospho (ST) | 0.0000001000000.0 | Synth_pep_375V.1021.1021.2.dta             |
| GPSGVXSQAQLXR | 2 8 2 0 | 565  | 3 | 470.2203 | 1407.639 | 3 | 31.83 | 0.0042 | GPSGEVSAQAQLER | Phospho (ST) | 0.0000001000000.0 | AIC_synth_45.1016.1016.3.dta               |
| SXPFKXSPFLXFR | 5 3 3 1 | 1068 | 3 | 532.2745 | 1593.802 | 3 | 25.9  | 0.0042 | SLPFKASPLFFGK  | Phospho (ST) | 0.0000001000000.0 | AIC_synth_45.1780.1780.3.dta               |
| GPSGVXSQAQLXR | 0 2 9 1 | 60   | 2 | 693.8201 | 1385.626 | 2 | 31.86 | 0.0041 | GPSGAVSEAQLYK  | Phospho (ST) | 0.0000001000000.0 | Synth_pep_325V.839.839.3.dta               |
| GPSGVXSQAQLXR | 9 5 6 1 | 1914 | 2 | 693.8373 | 1385.66  | 2 | 34.71 | 0.0041 | GPSGVVSAQAQLSK | Phospho (ST) | 0.0000001000000.0 | Synth_pep_275V.1122.1122.2.dta             |
| GPSGVXSQAQLXR | 7 3 3 1 | 1468 | 2 | 709.8401 | 1417.666 | 2 | 31.67 | 0.0041 | GPSGVVSAQAQLFK | Phospho (ST) | 0.0000001000000.0 | Synth_pep_325V.1322.1322.2.dta             |
| SXPFKXSPFLXFR | 5 3 8 0 | 1077 | 3 | 525.6097 | 1573.807 | 3 | 23.95 | 0.004  | SLPFKASPLVFR   | Phospho (ST) | 0.0000001000000.0 | Synth_pep_425V.1308.1308.3.dta             |
| GPSGVXSQAQLXR | 5 5 2 0 | 1105 | 2 | 703.8555 | 1405.697 | 2 | 32.5  | 0.004  | GPSGLVSAQAQLER | Phospho (ST) | 0.0000001000000.0 | Synth_pep_30V_120502214048.1269.1269.2.dta |
| SXPFKXSPFLXFR | 1 3 0 0 | 261  | 3 | 516.9137 | 1547.719 | 3 | 29.51 | 0.004  | SDPFKASPLAFGR  | Phospho (ST) | 0.0000001000000.0 | Synth_pep_375V.1193.1193.3.dta             |
| GPSGVXSQAQLXR | 6 9 9 1 | 1400 | 2 | 718.827  | 1435.64  | 2 | 35.32 | 0.004  | GPSGVVSYAQLYK  | Phospho (ST) | 0.0000001000000.0 | Synth_pep_375V.906.906.2.dta               |
| GPSGVXSQAQLXR | 0 9 1 1 | 184  | 2 | 686.8119 | 1371.609 | 2 | 32.41 | 0.004  | GPSGAVSQAQLDK  | Phospho (ST) | 0.0000001000000.0 | Synth_pep_30V_120502214048.865.865.2.dta   |
| GPSGVXSQAQLXR | 1 1 7 0 | 235  | 2 | 691.8031 | 1381.592 | 2 | 28.56 | 0.004  | GPSGDVSDAQLTR  | Phospho (ST) | 0.0000001000000.0 | AIC_synth_test_25.817.817.2.dta            |
| SXPFKXSPFLXFR | 9 7 3 0 | 1947 | 3 | 542.9304 | 1625.769 | 3 | 26.5  | 0.004  | SYPFKASPLFFGR  | Phospho (ST) | 0.0000001000000.0 | AIC_synth_45.1796.1796.3.dta               |
| GPSGVXSQAQLXR | 9 7 6 1 | 1954 | 2 | 687.8195 | 1373.625 | 2 | 36.21 | 0.004  | GPSGVVSTYAQLSK | Phospho (ST) | 0.0000001000000.0 | Synth_pep_275V.824.824.2.dta               |
| SXPFKXSPFLXFR | 0 5 8 0 | 117  | 2 | 749.895  | 1497.775 | 2 | 25.81 | 0.0039 | SAPFKASPLVFR   | Phospho (ST) | 0.0000001000000.0 | Synth_pep_275V.1261.1261.2.dta             |
| SXPFKXSPFLXFR | 4 3 5 1 | 872  | 2 | 752.8854 | 1503.756 | 2 | 26.68 | 0.0039 | SGPFKASPLFFGK  | Phospho (ST) | 0.0000001000000.0 | AIC_synth_test_25.1713.1713.2.dta          |

|                           |   |          |          |   |       |        |                |              |                   |                                            |
|---------------------------|---|----------|----------|---|-------|--------|----------------|--------------|-------------------|--------------------------------------------|
| GPSGXVSAQXLR 0 1 0 39     | 1 | 467.5471 | 1399.62  | 3 | 32.59 | 0.0033 | GPSGAVSQAQLYR  | Phospho (ST) | 0.0000001000000.0 | AIC_synth_45.892.892.3.dta                 |
| SXPFKXSPXLFGR 7 8 1 1564  | 1 | 751.8691 | 1501.724 | 2 | 31.21 | 0.0033 | STPFKXSPDLDFGK | Phospho (ST) | 0.0000001000000.0 | Synth_pep_275V.1138.1138.2.dta             |
| GPSGXVSAQXLR 2 6 1 1524   | 1 | 677.7996 | 1353.585 | 2 | 26.93 | 0.0033 | GPSGVSSAQLDK   | Phospho (ST) | 0.0000001000000.0 | Synth_pep_30V_120502214048.698.698.2.dta   |
| GPSGXVSAQXLR 0 3 4 170    | 1 | 649.8099 | 1297.605 | 2 | 33.02 | 0.0033 | GPSGVSSAQLGK   | Phospho (ST) | 0.0000001000000.0 | Synth_pep_30V_120502214048.1004.1004.2.dta |
| SXPFKXSPXLFGR 8 3 8 1678  | 1 | 511.6033 | 1531.788 | 3 | 27.42 | 0.0033 | SVPFKXSPVLFVGK | Phospho (ST) | 0.0000001000000.0 | Synth_pep_40V.1186.1186.3.dta              |
| SXPFKXSPXLFGR 6 9 1 1384  | 1 | 518.2408 | 1551.701 | 3 | 30.05 | 0.0033 | STPFKXSPDLDFGK | Phospho (ST) | 0.0000001000000.0 | AIC_synth_45.1252.1252.3.dta               |
| GPSGXVSAQXLR 3 3 2 1666   | 1 | 723.8372 | 1445.66  | 2 | 33.28 | 0.0033 | GPSGVSSAQLGK   | Phospho (ST) | 0.0000001000000.0 | Synth_pep_275V.1315.1315.2.dta             |
| GPSGXVSAQXLR 0 6 2 1126   | 1 | 655.8046 | 1309.595 | 2 | 31.33 | 0.0033 | GPSGVSSAQLGK   | Phospho (ST) | 0.0000001000000.0 | Synth_pep_30V_120502214048.697.697.2.dta   |
| SXPFKXSPXLFGR 9 9 9 1200  | 1 | 838.8909 | 1675.767 | 2 | 24.9  | 0.0032 | SYPFKXSPVLFVGK | Phospho (ST) | 0.0000001000000.0 | AIC_synth_test_25.1459.1459.2.dta          |
| SXPFKXSPXLFGR 4 6 9 0939  | 1 | 508.2392 | 1521.696 | 3 | 34.68 | 0.0032 | SGPFKXSPVLFGR  | Phospho (ST) | 0.0000001000000.0 | Synth_pep_40V.928.928.3.dta                |
| SXPFKXSPXLFGR 0 8 1 0163  | 1 | 750.864  | 1499.714 | 2 | 33.78 | 0.0032 | SAPFKXSPDLDFGK | Phospho (ST) | 0.0000001000000.0 | AIC_synth_45.1117.1117.2.dta               |
| GPSGXVSAQXLR 9 0 9 1820   | 1 | 710.8295 | 1419.645 | 2 | 34.06 | 0.0032 | GPSGVSSAQLYK   | Phospho (ST) | 0.0000001000000.0 | AIC_synth_test_25.1178.1178.2.dta          |
| SXPFKXSPXLFGR 0 1 0 122   | 1 | 482.2361 | 1443.686 | 3 | 34.05 | 0.0032 | SAPFKXSPDLDFGK | Phospho (ST) | 0.0000001000000.0 | AIC_synth_45.988.988.3.dta                 |
| GPSGXVSAQXLR 4 5 0 1902   | 1 | 422.2144 | 1263.621 | 3 | 29.02 | 0.0032 | GPSGVSSAQLGK   | Phospho (ST) | 0.0000001000000.0 | AIC_synth_45.942.942.3.dta                 |
| SXPFKXSPXLFGR 5 1 3 11028 | 1 | 521.5932 | 1561.758 | 3 | 31.05 | 0.0032 | SVPFKXSPDLDFGK | Phospho (ST) | 0.0000001000000.0 | AIC_synth_45.1416.1416.3.dta               |
| GPSGXVSAQXLR 3 3 0 1662   | 1 | 694.8329 | 1387.651 | 2 | 33.74 | 0.0032 | GPSGVSSAQLGK   | Phospho (ST) | 0.0000001000000.0 | Synth_pep_30V_120502214048.1282.1282.2.dta |
| SXPFKXSPXLFGR 0 5 1 0103  | 1 | 757.8719 | 1513.729 | 2 | 34.41 | 0.0031 | SAPFKXSPDLDFGK | Phospho (ST) | 0.0000001000000.0 | Synth_pep_30V_120502214048.1203.1203.2.dta |
| GPSGXVSAQXLR 9 1 1 01823  | 1 | 482.2078 | 1443.602 | 3 | 30.54 | 0.0031 | GPSGVSSAQLDR   | Phospho (ST) | 0.0000001000000.0 | Synth_pep_30V.817.817.3.dta                |
| GPSGXVSAQXLR 5 0 2 1006   | 1 | 668.83   | 1335.646 | 2 | 32.77 | 0.0031 | GPSGVSSAQLGK   | Phospho (ST) | 0.0000001000000.0 | Synth_pep_30V_120502214048.961.961.2.dta   |
| SXPFKXSPXLFGR 5 6 5 01131 | 1 | 764.9008 | 1527.787 | 2 | 26.94 | 0.0031 | SVPFKXSPDLDFGK | Phospho (ST) | 0.0000001000000.0 | AIC_synth_test_25.1712.1712.2.dta          |
| SXPFKXSPXLFGR 2 3 2 1466  | 1 | 531.5834 | 1591.728 | 3 | 26.89 | 0.0031 | SEPFKXSPDLDFGK | Phospho (ST) | 0.0000001000000.0 | AIC_synth_45.1446.1446.3.dta               |
| GPSGXVSAQXLR 0 0 4 09     | 1 | 625.8002 | 1249.586 | 2 | 25.21 | 0.003  | GPSGVSSAQLGK   | Phospho (ST) | 0.0000001000000.0 | AIC_synth_test_25.849.849.2.dta            |
| SXPFKXSPXLFGR 7 6 9 1540  | 1 | 513.5798 | 1537.718 | 3 | 28.71 | 0.003  | STPFKXSPVLFVGK | Phospho (ST) | 0.0000001000000.0 | AIC_synth_425V.909.909.3.dta               |
| SXPFKXSPXLFGR 7 8 2 01565 | 1 | 772.8771 | 1543.74  | 2 | 33.86 | 0.003  | STPFKXSPDLDFGK | Phospho (ST) | 0.0000001000000.0 | Synth_pep_30V_120502214048.1091.1091.2.dta |
| GPSGXVSAQXLR 6 5 5 11312  | 1 | 668.8476 | 1335.681 | 2 | 33.14 | 0.003  | GPSGVSSAQLGK   | Phospho (ST) | 0.0000001000000.0 | AIC_synth_test_25.1665.1665.2.dta          |
| GPSGXVSAQXLR 9 0 7 1816   | 1 | 679.8234 | 1357.632 | 2 | 37.35 | 0.003  | GPSGVSSAQLTK   | Phospho (ST) | 0.0000001000000.0 | Synth_pep_325V.873.873.2.dta               |
| GPSGXVSAQXLR 0 3 4 170    | 1 | 649.8104 | 1297.606 | 2 | 33.37 | 0.003  | GPSGVSSAQLGK   | Phospho (ST) | 0.0000001000000.0 | Synth_pep_35V.996.996.2.dta                |
| GPSGXVSAQXLR 9 9 8 11998  | 1 | 483.566  | 1447.676 | 3 | 35.62 | 0.003  | GPSGVSSAQLVYK  | Phospho (ST) | 0.0000001000000.0 | Synth_pep_425V.1038.1038.3.dta             |
| SXPFKXSPXLFGR 1 9 5 01391 | 1 | 536.26   | 1605.758 | 3 | 32.29 | 0.003  | SVPFKXSPDLDFGK | Phospho (ST) | 0.0000001000000.0 | AIC_synth_45.1471.1471.3.dta               |
| SXPFKXSPXLFGR 5 8 0 11162 | 1 | 490.9306 | 1469.77  | 3 | 31.01 | 0.0029 | SVPFKXSPDLDFGK | Phospho (ST) | 0.0000001000000.0 | AIC_synth_45.1420.1420.3.dta               |
| SXPFKXSPXLFGR 1 0 1 0203  | 1 | 506.2322 | 1515.675 | 3 | 33.9  | 0.0029 | SVPFKXSPDLDFGK | Phospho (ST) | 0.0000001000000.0 | AIC_synth_45.1220.1220.3.dta               |
| GPSGXVSAQXLR 4 4 4 1890   | 1 | 597.7795 | 1193.544 | 2 | 31.61 | 0.0029 | GPSGVSSAQLGK   | Phospho (ST) | 0.0000001000000.0 | Synth_pep_275V.741.741.2.dta               |
| GPSGXVSAQXLR 3 0 5 1612   | 1 | 677.8423 | 1353.67  | 2 | 33.72 | 0.0029 | GPSGVSSAQLGK   | Phospho (ST) | 0.0000001000000.0 | Synth_pep_30V_120502214048.1240.1240.2.dta |
| GPSGXVSAQXLR 0 3 1 164    | 1 | 678.8127 | 1355.611 | 2 | 35.4  | 0.0029 | GPSGVSSAQLDK   | Phospho (ST) | 0.0000001000000.0 | Synth_pep_275V.1052.1052.2.dta             |
| GPSGXVSAQXLR 0 3 2 166    | 1 | 685.8195 | 1369.624 | 2 | 32.45 | 0.0029 | GPSGVSSAQLGK   | Phospho (ST) | 0.0000001000000.0 | Synth_pep_325V.1057.1057.2.dta             |
| GPSGXVSAQXLR 1 8 8 01377  | 1 | 682.8325 | 1363.65  | 2 | 30.02 | 0.0029 | GPSGVSSAQLVYK  | Phospho (ST) | 0.0000001000000.0 | Synth_pep_35V.1016.1016.2.dta              |
| GPSGXVSAQXLR 0 3 5 172    | 1 | 677.8411 | 1353.668 | 2 | 33.83 | 0.0028 | GPSGVSSAQLGK   | Phospho (ST) | 0.0000001000000.0 | Synth_pep_30V_120502214048.1312.1312.2.dta |
| SXPFKXSPXLFGR 2 2 2 0445  | 1 | 534.9099 | 1601.708 | 3 | 28.5  | 0.0028 | SEPFKXSPDLDFGK | Phospho (ST) | 0.0000001000000.0 | Synth_pep_425V.927.927.3.dta               |
| GPSGXVSAQXLR 1 5 4 1310   | 1 | 654.8151 | 1307.616 | 2 | 32.78 | 0.0028 | GPSGVSSAQLGK   | Phospho (ST) | 0.0000001000000.0 | AIC_synth_test_25.1130.1130.2.dta          |
| GPSGXVSAQXLR 9 3 6 1874   | 1 | 710.8311 | 1419.648 | 2 | 34.63 | 0.0028 | GPSGVSSAQLGK   | Phospho (ST) | 0.0000001000000.0 | AIC_synth_test_25.1392.1392.2.dta          |
| GPSGXVSAQXLR 3 7 5 1752   | 1 | 692.8493 | 1383.684 | 2 | 32.16 | 0.0028 | GPSGVSSAQLGK   | Phospho (ST) | 0.0000001000000.0 | Synth_pep_30V_120502214048.1186.1186.2.dta |
| GPSGXVSAQXLR 7 2 4 01449  | 1 | 446.8724 | 1337.595 | 3 | 32.23 | 0.0028 | GPSGVSSAQLGK   | Phospho (ST) | 0.0000001000000.0 | Synth_pep_425V.743.743.3.dta               |
| GPSGXVSAQXLR 4 3 9 1880   | 1 | 695.824  | 1389.634 | 2 | 35    | 0.0028 | GPSGVSSAQLYK   | Phospho (ST) | 0.0000001000000.0 | Synth_pep_325V.1096.1096.2.dta             |
| GPSGXVSAQXLR 5 5 3 01107  | 1 | 475.5836 | 1423.729 | 3 | 28.97 | 0.0027 | GPSGVSSAQLGK   | Phospho (ST) | 0.0000001000000.0 | AIC_synth_45.1972.1972.3.dta               |
| SXPFKXSPXLFGR 5 8 0 11162 | 1 | 490.9304 | 1469.769 | 3 | 31.21 | 0.0027 | SVPFKXSPDLDFGK | Phospho (ST) | 0.0000001000000.0 | Synth_pep_35V.1148.1148.3.dta              |
| GPSGXVSAQXLR 3 9 3 1788   | 1 | 740.8481 | 1479.682 | 2 | 35.76 | 0.0027 | GPSGVSSAQLGK   | Phospho (ST) | 0.0000001000000.0 | Synth_pep_35V.1364.1364.2.dta              |
| GPSGXVSAQXLR 7 8 3 11568  | 1 | 685.8398 | 1369.665 | 2 | 33.48 | 0.0027 | GPSGVSSAQLGK   | Phospho (ST) | 0.0000001000000.0 | Synth_pep_35V.1185.1185.2.dta              |
| SXPFKXSPXLFGR 0 1 9 140   | 1 | 512.9083 | 1535.703 | 3 | 34.81 | 0.0027 | SAPFKXSPVLFVGK | Phospho (ST) | 0.0000001000000.0 | Synth_pep_425V.923.923.3.dta               |
| GPSGXVSAQXLR 1 9 8 1398   | 1 | 700.8295 | 1399.645 | 2 | 33.17 | 0.0027 | GPSGVSSAQLVYK  | Phospho (ST) | 0.0000001000000.0 | Synth_pep_325V.1016.1016.2.dta             |
| SXPFKXSPXLFGR 9 6 2 11926 | 1 | 522.9119 | 1565.714 | 3 | 29.59 | 0.0027 | SVPFKXSPDLDFGK | Phospho (ST) | 0.0000001000000.0 | Synth_pep_425V.996.996.3.dta               |
| SXPFKXSPXLFGR 2 2 7 1456  | 1 | 516.2441 | 1545.71  | 3 | 25.73 | 0.0027 | SVPFKXSPDLDFGK | Phospho (ST) | 0.0000001000000.0 | AIC_synth_45.1024.1024.3.dta               |
| GPSGXVSAQXLR 4 6 3 1928   | 1 | 657.808  | 1313.601 | 2 | 33.96 | 0.0027 | GPSGVSSAQLGK   | Phospho (ST) | 0.0000001000000.0 | Synth_pep_275V.1004.1004.2.dta             |
| GPSGXVSAQXLR 3 4 6 1694   | 1 | 657.8085 | 1313.602 | 2 | 33.88 | 0.0027 | GPSGVSSAQLGK   | Phospho (ST) | 0.0000001000000.0 | Synth_pep_325V.891.891.2.dta               |
| SXPFKXSPXLFGR 4 9 3 1988  | 1 | 518.9174 | 1553.73  | 3 | 31.76 | 0.0026 | SVPFKXSPDLDFGK | Phospho (ST) | 0.0000001000000.0 | Synth_pep_40V.1115.1115.3.dta              |
| SXPFKXSPXLFGR 5 9 1 01183 | 1 | 536.2596 | 1605.757 | 3 | 32.85 | 0.0026 | SVPFKXSPDLDFGK | Phospho (ST) | 0.0000001000000.0 | Synth_pep_40V.1137.1137.3.dta              |
| SXPFKXSPXLFGR 9 9 9 01999 | 1 | 568.932  | 1703.774 | 3 | 25.87 | 0.0026 | SVPFKXSPVLFVGK | Phospho (ST) | 0.0000001000000.0 | AIC_synth_45.1360.1360.3.dta               |
| SXPFKXSPXLFGR 6 2 1 01243 | 1 | 516.2346 | 1545.682 | 3 | 31.39 | 0.0026 | SVPFKXSPDLDFGK | Phospho (ST) | 0.0000001000000.0 | Synth_pep_425V.948.948.3.dta               |
| SXPFKXSPXLFGR 4 5 6 1914  | 1 | 482.2455 | 1443.715 | 3 | 34.09 | 0.0026 | SVPFKXSPDLDFGK | Phospho (ST) | 0.0000001000000.0 | AIC_synth_45.1348.1348.3.dta               |
| GPSGXVSAQXLR 2 3 5 0471   | 1 | 720.8483 | 1439.682 | 2 | 31.05 | 0.0026 | GPSGVSSAQLGK   | Phospho (ST) | 0.0000001000000.0 | AIC_synth_test_25.1753.1753.2.dta          |
| SXPFKXSPXLFGR 4 1 9 1840  | 1 | 508.2372 | 1521.69  | 3 | 34.84 | 0.0026 | SVPFKXSPVLFVGK | Phospho (ST) | 0.0000001000000.0 | Synth_pep_35V.954.954.3.dta                |
| GPSGXVSAQXLR 1 3 9 1280   | 1 | 724.8242 | 1447.634 | 2 | 32.24 | 0.0026 | GPSGVSSAQLGK   | Phospho (ST) | 0.0000001000000.0 | Synth_pep_35V.1118.1118.2.dta              |
| GPSGXVSAQXLR 6 3 6 11274  | 1 | 672.8118 | 1343.609 | 2 | 29.35 | 0.0026 | GPSGVSSAQLGK   | Phospho (ST) | 0.0000001000000.0 | Synth_pep_325V.952.952.2.dta               |
| GPSGXVSAQXLR 3 5 6 1714   | 1 | 685.8397 | 1369.665 | 2 | 33.75 | 0.0026 | GPSGVSSAQLGK   | Phospho (ST) | 0.0000001000000.0 | Synth_pep_325V.1200.1200.2.dta             |
| GPSGXVSAQXLR 7 3 3 11468  | 1 | 709.8394 | 1417.664 | 2 | 32.05 | 0.0026 | GPSGVSSAQLGK   | Phospho (ST) | 0.0000001000000.0 | Synth_pep_30V_120502214048.1362.1362.2.dta |
| GPSGXVSAQXLR 0 4 7 196    | 1 | 626.8007 | 1251.587 | 2 | 31.09 | 0.0026 | GPSGAVSQAQLTK  | Phospho (ST) | 0.0000001000000.0 | Synth_pep_375V.754.754.2.dta               |
| GPSGXVSAQXLR 3 5 9 1720   | 1 | 482.9057 | 1445.695 | 3 | 32.85 | 0.0025 | GPSGVSSAQLYK   | Phospho (ST) | 0.0000001000000.0 | Synth_pep_425V.1242.1242.3.dta             |
| SXPFKXSPXLFGR 3 8 9 0779  | 1 | 542.2668 | 1623.779 | 3 | 25.98 | 0.0025 | SVPFKXSPVLFVGK | Phospho (ST) | 0.0000001000000.0 | Synth_pep_40V.1201.1201.3.dta              |
| SXPFKXSPXLFGR 5 9 2 01185 | 1 | 540.9318 | 1619.774 | 3 | 31.14 | 0.0025 | SVPFKXSPDLDFGK | Phospho (ST) | 0.0000001000000.0 | AIC_synth_45.1390.1390.3.dta               |
| SXPFKXSPXLFGR 3 8 2 0765  | 1 | 795.8864 | 1589.758 | 2 | 31.7  | 0.0025 | SVPFKXSPDLDFGK | Phospho (ST) | 0.0000001000000.0 | Synth_pep_275V.1322.1322.2.dta             |
| SXPFKXSPXLFGR 4 3 1 1864  | 1 | 502.9061 | 1505.697 | 3 | 32.23 | 0.0025 | SVPFKXSPDLDFGK | Phospho (ST) | 0.0000001000000.0 | Synth_pep_425V.1172.1172.3.dta             |
| SXPFKXSPXLFGR 6 2 4 1250  | 1 | 730.8428 | 1459.671 | 2 | 32.83 | 0.0025 | SVPFKXSPDLDFGK | Phospho (ST) | 0.0000001000000.0 | Synth_pep_30V_120502214048.898.898.2.dta   |
| GPSGXVSAQXLR 4 9 5 1992   | 1 | 678.8322 | 1355.65  | 2 | 33.85 | 0.0025 | GPSGVSSAQLGK   | Phospho (ST) | 0.0000001000000.0 | Synth_pep_275V.1139.1139.2.dta             |
| GPSGXVSAQXLR 1 9 3 0387   | 1 | 738.8266 | 1475.639 | 2 | 32.12 | 0.0025 | GPSGVSSAQLGK   | Phospho (ST) | 0.0000001000000.0 | Synth_pep_325V.1152.1152.2.dta             |
| GPSGXVSAQXLR 9 8 3 01967  | 1 | 487.5685 | 1459.684 | 3 | 32.3  | 0.0024 | GPSGVSSAQLGK   | Phospho (ST) | 0.0000001000000.0 | Synth_pep_40V.1259.1259.3.dta              |
| SXPFKXSPXLFGR 4 9 3 1988  | 1 | 518.9182 | 1553.733 | 3 | 31.7  | 0.0024 | SVPFKXSPDLDFGK | Phospho (ST) | 0.0000001000000.0 | Synth_pep_375V.1124.1124.3.dta             |
| SXPFKXSPXLFGR 4 0 4 1810  | 1 | 686.8383 | 1371.662 | 2 | 30.8  | 0.0024 | SVPFKXSPDLDFGK | Phospho (ST) | 0.0000001000000.0 | AIC_synth_test_25.1119.1119.2.dta          |
| SXPFKXSPXLFGR 4 7 1 01943 | 1 | 496.8991 | 1487.675 | 3 | 35.27 | 0.0024 | SVPFKXSPDLDFGK | Phospho (ST) | 0.0000001000000.0 | Synth_pep_40V.961.961.3.dta                |
| GPSGXVSAQXLR 8 5 3 1708   | 1 | 461.5737 | 1381.699 | 3 | 33.58 | 0.0024 | GPSGVSSA       |              |                   |                                            |

|                |         |      |   |          |          |   |       |        |                |              |                   |                                            |
|----------------|---------|------|---|----------|----------|---|-------|--------|----------------|--------------|-------------------|--------------------------------------------|
| SXPFKXSLXFLXGR | 6 3 5 0 | 1271 | 1 | 781.8924 | 1561.77  | 2 | 30.81 | 0.0022 | SXPFKXSLXFLXGR | Phospho (ST) | 0.0000001000000.0 | Synth_pep_275V.1384.1384.2.dta             |
| GPSGVXSAQXLR   | 3 5 9 1 | 1720 | 1 | 723.8541 | 1445.694 | 2 | 34.11 | 0.0021 | GPSGVXSAQXLR   | Phospho (ST) | 0.0000001000000.0 | Synth_pep_30V_120502214048.1321.1321.2.dta |
| GPSGVXSAQXLR   | 2 5 2 0 | 505  | 1 | 711.8329 | 1421.651 | 2 | 34.02 | 0.0021 | GPSGVXSAQXLR   | Phospho (ST) | 0.0000001000000.0 | Synth_pep_30V_120502214048.1045.1045.2.dta |
| SXPFKXSLXFLXGR | 7 1 2 0 | 1425 | 1 | 780.8563 | 1559.698 | 2 | 32.33 | 0.0021 | SXPFKXSLXFLXGR | Phospho (ST) | 0.0000001000000.0 | Synth_pep_30V_120502214048.945.945.2.dta   |
| GPSGVXSAQXLR   | 1 2 9 0 | 259  | 1 | 486.8802 | 1457.619 | 3 | 33.17 | 0.0021 | GPSGVXSAQXLR   | Phospho (ST) | 0.0000001000000.0 | Synth_pep_40V.832.832.3.dta                |
| SXPFKXSLXFLXGR | 3 3 0 2 | 65   | 1 | 781.8713 | 1561.728 | 2 | 32.06 | 0.0021 | SXPFKXSLXFLXGR | Phospho (ST) | 0.0000001000000.0 | Synth_pep_30V_120502214048.1210.1210.2.dta |
| SXPFKXSLXFLXGR | 5 4 2 1 | 1086 | 1 | 496.2498 | 1485.728 | 3 | 35.37 | 0.0021 | SXPFKXSLXFLXGR | Phospho (ST) | 0.0000001000000.0 | Synth_pep_375V.1019.1019.3.dta             |
| GPSGVXSAQXLR   | 1 1 1 1 | 1224 | 1 | 684.7903 | 1367.566 | 2 | 30.03 | 0.0021 | GPSGVXSAQXLR   | Phospho (ST) | 0.0000001000000.0 | Synth_pep_35V.738.738.2.dta                |
| SXPFKXSLXFLXGR | 5 0 1 0 | 1003 | 1 | 757.8729 | 1513.731 | 2 | 36.22 | 0.002  | SXPFKXSLXFLXGR | Phospho (ST) | 0.0000001000000.0 | Synth_pep_275V.1177.1177.2.dta             |
| GPSGVXSAQXLR   | 0 3 5 1 | 172  | 1 | 677.8444 | 1353.674 | 2 | 32.69 | 0.002  | GPSGVXSAQXLR   | Phospho (ST) | 0.0000001000000.0 | AIC_synth_test_25.1736.1736.2.dta          |
| GPSGVXSAQXLR   | 3 5 9 0 | 1719 | 1 | 737.8595 | 1473.704 | 2 | 32.62 | 0.002  | GPSGVXSAQXLR   | Phospho (ST) | 0.0000001000000.0 | AIC_synth_test_25.1783.1783.2.dta          |
| SXPFKXSLXFLXGR | 3 3 0 1 | 662  | 1 | 776.8844 | 1551.754 | 2 | 27.31 | 0.002  | SXPFKXSLXFLXGR | Phospho (ST) | 0.0000001000000.0 | Synth_pep_275V.1418.1418.2.dta             |
| SXPFKXSLXFLXGR | 4 7 8 1 | 1958 | 1 | 482.248  | 1443.722 | 3 | 32.88 | 0.002  | SXPFKXSLXFLXGR | Phospho (ST) | 0.0000001000000.0 | Synth_pep_45.1108.1108.3.dta               |
| GPSGVXSAQXLR   | 2 3 9 1 | 1480 | 1 | 731.8311 | 1461.648 | 2 | 32.12 | 0.002  | GPSGVXSAQXLR   | Phospho (ST) | 0.0000001000000.0 | Synth_pep_325V.1167.1167.2.dta             |
| SXPFKXSLXFLXGR | 9 7 9 0 | 1959 | 1 | 821.884  | 1641.753 | 2 | 30.16 | 0.002  | SXPFKXSLXFLXGR | Phospho (ST) | 0.0000001000000.0 | Synth_pep_30V_120502214048.1101.1101.2.dta |
| GPSGVXSAQXLR   | 7 9 3 0 | 1587 | 1 | 488.2309 | 1461.671 | 3 | 32.55 | 0.002  | GPSGVXSAQXLR   | Phospho (ST) | 0.0000001000000.0 | Synth_pep_375V.1467.1467.3.dta             |
| GPSGVXSAQXLR   | 3 3 5 0 | 671  | 1 | 729.8617 | 1457.709 | 2 | 31.28 | 0.0019 | GPSGVXSAQXLR   | Phospho (ST) | 0.0000001000000.0 | AIC_synth_test_25.2047.2047.2.dta          |
| SXPFKXSLXFLXGR | 4 5 4 1 | 910  | 1 | 707.8602 | 1413.706 | 2 | 33.45 | 0.0019 | SXPFKXSLXFLXGR | Phospho (ST) | 0.0000001000000.0 | Synth_pep_275V.1192.1192.2.dta             |
| SXPFKXSLXFLXGR | 3 0 0 1 | 602  | 1 | 492.9151 | 1475.724 | 3 | 27.16 | 0.0019 | SXPFKXSLXFLXGR | Phospho (ST) | 0.0000001000000.0 | Synth_pep_35V.1101.1101.3.dta              |
| SXPFKXSLXFLXGR | 8 3 8 0 | 1677 | 1 | 520.9376 | 1559.791 | 3 | 27.14 | 0.0019 | SXPFKXSLXFLXGR | Phospho (ST) | 0.0000001000000.0 | AIC_synth_45.1578.1578.3.dta               |
| SXPFKXSLXFLXGR | 6 4 9 1 | 1300 | 1 | 747.8547 | 1493.695 | 2 | 36.94 | 0.0019 | SXPFKXSLXFLXGR | Phospho (ST) | 0.0000001000000.0 | Synth_pep_275V.972.972.2.dta               |
| GPSGVXSAQXLR   | 5 4 3 0 | 1087 | 1 | 456.8934 | 1367.658 | 3 | 34.38 | 0.0019 | GPSGVXSAQXLR   | Phospho (ST) | 0.0000001000000.0 | AIC_synth_45.1410.1410.3.dta               |
| SXPFKXSLXFLXGR | 3 3 0 2 | 1865 | 1 | 827.885  | 1653.756 | 2 | 30.73 | 0.0019 | SXPFKXSLXFLXGR | Phospho (ST) | 0.0000001000000.0 | Synth_pep_275V.1339.1339.2.dta             |
| GPSGVXSAQXLR   | 9 9 3 1 | 1988 | 1 | 499.5651 | 1495.674 | 3 | 36.72 | 0.0019 | GPSGVXSAQXLR   | Phospho (ST) | 0.0000001000000.0 | Synth_pep_40V.1187.1187.3.dta              |
| GPSGVXSAQXLR   | 9 1 9 1 | 1840 | 1 | 732.826  | 1463.638 | 2 | 34.67 | 0.0019 | GPSGVXSAQXLR   | Phospho (ST) | 0.0000001000000.0 | Synth_pep_325V.986.986.2.dta               |
| GPSGVXSAQXLR   | 5 4 2 1 | 1086 | 1 | 661.8223 | 1321.63  | 2 | 35.25 | 0.0019 | GPSGVXSAQXLR   | Phospho (ST) | 0.0000001000000.0 | Synth_pep_275V.896.896.2.dta               |
| SXPFKXSLXFLXGR | 1 2 6 0 | 253  | 1 | 773.8477 | 1545.681 | 2 | 32.74 | 0.0019 | SXPFKXSLXFLXGR | Phospho (ST) | 0.0000001000000.0 | Synth_pep_30V_120502214048.1011.1011.2.dta |
| SXPFKXSLXFLXGR | 3 3 3 0 | 667  | 1 | 552.9387 | 1655.794 | 3 | 27.16 | 0.0019 | SXPFKXSLXFLXGR | Phospho (ST) | 0.0000001000000.0 | AIC_synth_45.1860.1860.3.dta               |
| GPSGVXSAQXLR   | 9 0 3 1 | 1808 | 1 | 702.8327 | 1403.651 | 2 | 36.48 | 0.0019 | GPSGVXSAQXLR   | Phospho (ST) | 0.0000001000000.0 | AIC_synth_test_25.1511.1511.2.dta          |
| GPSGVXSAQXLR   | 3 5 7 1 | 1716 | 1 | 692.8477 | 1383.681 | 2 | 34.22 | 0.0019 | GPSGVXSAQXLR   | Phospho (ST) | 0.0000001000000.0 | Synth_pep_275V.1340.1340.2.dta             |
| GPSGVXSAQXLR   | 6 9 6 1 | 1394 | 1 | 680.8113 | 1359.608 | 2 | 37.78 | 0.0019 | GPSGVXSAQXLR   | Phospho (ST) | 0.0000001000000.0 | Synth_pep_375V.800.800.2.dta               |
| GPSGVXSAQXLR   | 4 6 8 0 | 1937 | 1 | 647.8128 | 1293.611 | 2 | 34.8  | 0.0019 | GPSGVXSAQXLR   | Phospho (ST) | 0.0000001000000.0 | AIC_synth_test_25.984.984.2.dta            |
| GPSGVXSAQXLR   | 5 3 5 0 | 1071 | 1 | 475.5807 | 1423.72  | 3 | 30.98 | 0.0018 | GPSGVXSAQXLR   | Phospho (ST) | 0.0000001000000.0 | Synth_pep_40V.1394.1394.3.dta              |
| SXPFKXSLXFLXGR | 4 5 3 1 | 1908 | 1 | 502.2582 | 1503.753 | 3 | 30.59 | 0.0018 | SXPFKXSLXFLXGR | Phospho (ST) | 0.0000001000000.0 | AIC_synth_45.1588.1588.3.dta               |
| SXPFKXSLXFLXGR | 2 2 9 1 | 1460 | 1 | 804.87   | 1607.725 | 2 | 30.44 | 0.0018 | SXPFKXSLXFLXGR | Phospho (ST) | 0.0000001000000.0 | Synth_pep_275V.995.995.2.dta               |
| GPSGVXSAQXLR   | 8 5 6 0 | 1713 | 1 | 675.8432 | 1349.672 | 2 | 32.22 | 0.0018 | GPSGVXSAQXLR   | Phospho (ST) | 0.0000001000000.0 | Synth_pep_35V.1086.1086.2.dta              |
| GPSGVXSAQXLR   | 2 2 5 0 | 451  | 1 | 711.8342 | 1421.654 | 2 | 33.73 | 0.0018 | GPSGVXSAQXLR   | Phospho (ST) | 0.0000001000000.0 | Synth_pep_325V.954.954.2.dta               |
| GPSGVXSAQXLR   | 9 1 4 0 | 1883 | 1 | 462.8727 | 1385.596 | 3 | 34.35 | 0.0018 | GPSGVXSAQXLR   | Phospho (ST) | 0.0000001000000.0 | Synth_pep_425V.803.803.3.dta               |
| SXPFKXSLXFLXGR | 2 3 2 0 | 465  | 1 | 810.8732 | 1619.732 | 2 | 30.11 | 0.0018 | SXPFKXSLXFLXGR | Phospho (ST) | 0.0000001000000.0 | Synth_pep_275V.1284.1284.2.dta             |
| SXPFKXSLXFLXGR | 6 3 0 0 | 1261 | 1 | 760.868  | 1519.721 | 2 | 31.16 | 0.0018 | SXPFKXSLXFLXGR | Phospho (ST) | 0.0000001000000.0 | Synth_pep_275V.1272.1272.2.dta             |
| GPSGVXSAQXLR   | 0 4 9 1 | 1100 | 1 | 657.8081 | 1313.602 | 2 | 35.59 | 0.0018 | GPSGVXSAQXLR   | Phospho (ST) | 0.0000001000000.0 | Synth_pep_325V.812.812.2.dta               |
| GPSGVXSAQXLR   | 3 0 9 1 | 1620 | 1 | 702.8304 | 1403.646 | 2 | 35.85 | 0.0018 | GPSGVXSAQXLR   | Phospho (ST) | 0.0000001000000.0 | Synth_pep_30V_120502214048.1097.1097.2.dta |
| SXPFKXSLXFLXGR | 1 0 6 0 | 213  | 1 | 744.846  | 1487.678 | 2 | 33.17 | 0.0018 | SXPFKXSLXFLXGR | Phospho (ST) | 0.0000001000000.0 | Synth_pep_30V_120502214048.1025.1025.2.dta |
| SXPFKXSLXFLXGR | 0 1 8 1 | 38   | 1 | 491.5778 | 1471.712 | 3 | 35.76 | 0.0018 | SXPFKXSLXFLXGR | Phospho (ST) | 0.0000001000000.0 | Synth_pep_425V.1033.1033.3.dta             |
| GPSGVXSAQXLR   | 9 8 6 1 | 1974 | 1 | 686.83   | 1371.646 | 2 | 37.51 | 0.0018 | GPSGVXSAQXLR   | Phospho (ST) | 0.0000001000000.0 | Synth_pep_275V.979.979.2.dta               |
| GPSGVXSAQXLR   | 9 9 2 1 | 1986 | 1 | 739.8347 | 1477.655 | 2 | 34.86 | 0.0018 | GPSGVXSAQXLR   | Phospho (ST) | 0.0000001000000.0 | Synth_pep_325V.1007.1007.2.dta             |
| SXPFKXSLXFLXGR | 6 9 4 0 | 1389 | 1 | 761.8574 | 1521.7   | 2 | 33.64 | 0.0018 | SXPFKXSLXFLXGR | Phospho (ST) | 0.0000001000000.0 | Synth_pep_275V.1096.1096.2.dta             |
| GPSGVXSAQXLR   | 5 5 3 1 | 1108 | 1 | 466.2461 | 1395.716 | 3 | 32.35 | 0.0017 | GPSGVXSAQXLR   | Phospho (ST) | 0.0000001000000.0 | Synth_pep_40V.1450.1450.3.dta              |
| SXPFKXSLXFLXGR | 5 5 5 1 | 1112 | 1 | 763.9238 | 1525.833 | 2 | 27.78 | 0.0017 | SXPFKXSLXFLXGR | Phospho (ST) | 0.0000001000000.0 | Synth_pep_275V.1477.1477.2.dta             |
| GPSGVXSAQXLR   | 5 5 9 0 | 1119 | 1 | 720.8668 | 1439.719 | 2 | 30.94 | 0.0017 | GPSGVXSAQXLR   | Phospho (ST) | 0.0000001000000.0 | Synth_pep_35V.1190.1190.2.dta              |
| GPSGVXSAQXLR   | 0 5 8 1 | 118  | 1 | 653.8423 | 1305.67  | 2 | 34.01 | 0.0017 | GPSGVXSAQXLR   | Phospho (ST) | 0.0000001000000.0 | Synth_pep_325V.1298.1298.2.dta             |
| SXPFKXSLXFLXGR | 1 5 1 0 | 303  | 1 | 779.8693 | 1557.724 | 2 | 36.71 | 0.0017 | SXPFKXSLXFLXGR | Phospho (ST) | 0.0000001000000.0 | Synth_pep_275V.1328.1328.2.dta             |
| SXPFKXSLXFLXGR | 1 0 1 0 | 203  | 1 | 506.2319 | 1515.674 | 3 | 36.22 | 0.0017 | SXPFKXSLXFLXGR | Phospho (ST) | 0.0000001000000.0 | Synth_pep_40V.1010.1010.3.dta              |
| SXPFKXSLXFLXGR | 1 3 1 0 | 263  | 1 | 531.5761 | 1591.707 | 3 | 32.38 | 0.0017 | SXPFKXSLXFLXGR | Phospho (ST) | 0.0000001000000.0 | Synth_pep_40V.1228.1228.3.dta              |
| GPSGVXSAQXLR   | 4 0 4 1 | 810  | 1 | 604.788  | 1207.562 | 2 | 27.57 | 0.0017 | GPSGVXSAQXLR   | Phospho (ST) | 0.0000001000000.0 | Synth_pep_325V.802.802.2.dta               |
| GPSGVXSAQXLR   | 9 4 2 1 | 1886 | 1 | 686.8115 | 1371.609 | 2 | 36.01 | 0.0017 | GPSGVXSAQXLR   | Phospho (ST) | 0.0000001000000.0 | Synth_pep_275V.820.820.2.dta               |
| SXPFKXSLXFLXGR | 5 4 1 0 | 1083 | 1 | 500.9117 | 1499.713 | 3 | 36.61 | 0.0017 | SXPFKXSLXFLXGR | Phospho (ST) | 0.0000001000000.0 | Synth_pep_425V.1025.1025.3.dta             |
| GPSGVXSAQXLR   | 3 2 1 1 | 644  | 1 | 707.8172 | 1413.62  | 2 | 34.61 | 0.0017 | GPSGVXSAQXLR   | Phospho (ST) | 0.0000001000000.0 | Synth_pep_275V.990.990.2.dta               |
| SXPFKXSLXFLXGR | 2 8 2 0 | 565  | 1 | 786.874  | 1571.734 | 2 | 34.31 | 0.0017 | SXPFKXSLXFLXGR | Phospho (ST) | 0.0000001000000.0 | Synth_pep_30V_120502214048.1102.1102.2.dta |
| SXPFKXSLXFLXGR | 2 0 9 1 | 420  | 1 | 517.5825 | 1549.726 | 3 | 36.73 | 0.0017 | SXPFKXSLXFLXGR | Phospho (ST) | 0.0000001000000.0 | Synth_pep_40V.951.951.3.dta                |
| SXPFKXSLXFLXGR | 7 2 2 0 | 1445 | 1 | 787.8644 | 1573.714 | 2 | 34.12 | 0.0017 | SXPFKXSLXFLXGR | Phospho (ST) | 0.0000001000000.0 | Synth_pep_30V_120502214048.941.941.2.dta   |
| GPSGVXSAQXLR   | 2 1 6 1 | 434  | 1 | 677.7975 | 1353.58  | 2 | 32.9  | 0.0017 | GPSGVXSAQXLR   | Phospho (ST) | 0.0000001000000.0 | Synth_pep_35V.730.730.2.dta                |
| SXPFKXSLXFLXGR | 8 3 0 0 | 1661 | 1 | 511.5929 | 1531.757 | 3 | 32.08 | 0.0017 | SXPFKXSLXFLXGR | Phospho (ST) | 0.0000001000000.0 | AIC_synth_45.1524.1524.3.dta               |
| SXPFKXSLXFLXGR | 9 8 0 0 | 1961 | 1 | 774.885  | 1547.756 | 2 | 32.03 | 0.0017 | SXPFKXSLXFLXGR | Phospho (ST) | 0.0000001000000.0 | Synth_pep_275V.1140.1140.2.dta             |
| GPSGVXSAQXLR   | 3 6 5 1 | 732  | 1 | 685.8405 | 1369.666 | 2 | 34.84 | 0.0017 | GPSGVXSAQXLR   | Phospho (ST) | 0.0000001000000.0 | Synth_pep_325V.1127.1127.2.dta             |
| SXPFKXSLXFLXGR | 7 8 6 0 | 1573 | 1 | 751.8716 | 1501.729 | 2 | 34.74 | 0.0017 | SXPFKXSLXFLXGR | Phospho (ST) | 0.0000001000000.0 | Synth_pep_30V_120502214048.1093.1093.2.dta |
| GPSGVXSAQXLR   | 3 8 7 1 | 776  | 1 | 685.8397 | 1369.665 | 2 | 35.44 | 0.0017 | GPSGVXSAQXLR   | Phospho (ST) | 0.0000001000000.0 | Synth_pep_275V.1220.1220.2.dta             |
| GPSGVXSAQXLR   | 5 9 7 1 | 1196 | 1 | 700.8441 | 1399.674 | 2 | 38.91 | 0.0017 | GPSGVXSAQXLR   | Phospho (ST) | 0.0000001000000.0 | Synth_pep_30V_120502214048.1089.1089.2.dta |
| GPSGVXSAQXLR   | 9 1 6 1 | 1834 | 1 | 694.8083 | 1387.602 | 2 | 35.4  | 0.0017 | GPSGVXSAQXLR   | Phospho (ST) | 0.0000001000000.0 | Synth_pep_325V.791.791.2.dta               |
| GPSGVXSAQXLR   | 4 0 3 0 | 807  | 1 | 663.8113 | 1325.608 | 2 | 36.05 | 0.0017 | GPSGVXSAQXLR   | Phospho (ST) | 0.0000001000000.0 | AIC_synth_test_25.1363.1363.2.dta          |
| GPSGVXSAQXLR   | 3 5 9 1 | 1720 | 1 | 723.8552 | 1445.696 | 2 | 35.64 | 0.0016 | GPSGVXSAQXLR   | Phospho (ST) | 0.0000001000000.0 | Synth_pep_325V.1287.1287.2.dta             |
| SXPFKXSLXFLXGR | 8 3 1 0 | 1663 | 1 | 526.2545 | 1575.742 | 3 | 32.82 | 0.0016 | SXPFKXSLXFLXGR | Phospho (ST) | 0.0000001000000.0 | AIC_synth_45.1383.1383.3.dta               |
| SXPFKXSLXFLXGR | 5 4 5 1 | 1092 | 1 | 490.9308 | 1469.77  | 3 | 32.81 | 0.0016 | SXPFKXSL       |              |                   |                                            |

|               |         |      |   |          |          |   |       |        |               |              |                   |                                            |
|---------------|---------|------|---|----------|----------|---|-------|--------|---------------|--------------|-------------------|--------------------------------------------|
| SXPFKXSPLXFRG | 9 9 2 1 | 1986 | 1 | 548.2573 | 1641.75  | 3 | 28.39 | 0.0014 | SYPFKYSPLFEGK | Phospho (ST) | 0.0000001000000.0 | AIC_synth_45.1293.1293.3.dta               |
| GPSGVXSQAQLXR | 5 0 9 1 | 1020 | 1 | 457.5622 | 1369.665 | 3 | 36.26 | 0.0014 | GPSGLVSAQLYK  | Phospho (ST) | 0.0000001000000.0 | AIC_synth_45.1241.1241.3.dta               |
| SXPFKXSPLXFRG | 5 6 9 1 | 1140 | 1 | 517.5942 | 1549.761 | 3 | 33.97 | 0.0014 | SLPFKSSPLVFGK | Phospho (ST) | 0.0000001000000.0 | Synth_pep_375V.1035.1035.3.dta             |
| GPSGVXSQAQLXR | 6 9 3 0 | 1387 | 1 | 483.5583 | 1447.653 | 3 | 36.41 | 0.0014 | GPSGSVSAQLFR  | Phospho (ST) | 0.0000001000000.0 | Synth_pep_40V.1368.1368.3.dta              |
| GPSGVXSQAQLXR | 0 4 7 0 | 195  | 1 | 640.8035 | 1279.592 | 2 | 35.53 | 0.0014 | GPSGAVSQAQLTR | Phospho (ST) | 0.0000001000000.0 | Synth_pep_325V.745.745.2.dta               |
| GPSGVXSQAQLXR | 0 3 7 1 | 176  | 1 | 671.825  | 1341.635 | 2 | 34.47 | 0.0014 | GPSGVSFAQLTK  | Phospho (ST) | 0.0000001000000.0 | Synth_pep_325V.1049.1049.2.dta             |
| GPSGVXSQAQLXR | 6 3 4 1 | 1270 | 1 | 657.8079 | 1313.601 | 2 | 36.73 | 0.0014 | GPSGSVSAQLGK  | Phospho (ST) | 0.0000001000000.0 | Synth_pep_325V.971.971.2.dta               |
| GPSGVXSQAQLXR | 7 9 3 0 | 1587 | 1 | 488.2307 | 1461.67  | 3 | 34.22 | 0.0014 | GPSGTVSQAQLFR | Phospho (ST) | 0.0000001000000.0 | Synth_pep_35V.1483.1483.3.dta              |
| GPSGVXSQAQLXR | 1 9 6 1 | 394  | 1 | 694.8087 | 1387.603 | 2 | 36.18 | 0.0014 | GPSGVDVSAQLSK | Phospho (ST) | 0.0000001000000.0 | Synth_pep_375V.809.809.2.dta               |
| SXPFKXSPLXFRG | 1 2 9 1 | 260  | 1 | 532.2435 | 1593.709 | 3 | 32.56 | 0.0014 | SDPFKESPLVFGK | Phospho (ST) | 0.0000001000000.0 | Synth_pep_425V.990.990.3.dta               |
| GPSGVXSQAQLXR | 5 4 9 0 | 1099 | 1 | 692.8363 | 1383.658 | 2 | 32.73 | 0.0014 | GPSGLVSAQLYR  | Phospho (ST) | 0.0000001000000.0 | Synth_pep_275V.1040.1040.2.dta             |
| SXPFKXSPLXFRG | 9 9 1 1 | 1840 | 1 | 814.8734 | 1627.732 | 2 | 29.68 | 0.0013 | SYPFKDSPLVFGK | Phospho (ST) | 0.0000001000000.0 | Synth_pep_275V.1091.1091.2.dta             |
| SXPFKXSPLXFRG | 4 0 1 1 | 804  | 1 | 477.5617 | 1429.663 | 3 | 36.75 | 0.0013 | SDPFKASPLDFGK | Phospho (ST) | 0.0000001000000.0 | Synth_pep_425V.954.954.3.dta               |
| SXPFKXSPLXFRG | 5 4 5 1 | 1092 | 1 | 490.9298 | 1469.768 | 3 | 34.4  | 0.0013 | SLPFKSSPLVFGK | Phospho (ST) | 0.0000001000000.0 | Synth_pep_40V.1189.1189.3.dta              |
| GPSGVXSQAQLXR | 6 8 5 1 | 1372 | 1 | 661.8386 | 1321.663 | 2 | 35.95 | 0.0013 | GPSGSVSAQLLK  | Phospho (ST) | 0.0000001000000.0 | AIC_synth_test_25.1469.1469.2.dta          |
| GPSGVXSQAQLXR | 6 5 5 1 | 1312 | 1 | 668.8481 | 1335.682 | 2 | 36.75 | 0.0013 | GPSGSVSAQLLK  | Phospho (ST) | 0.0000001000000.0 | Synth_pep_325V.1231.1231.2.dta             |
| GPSGVXSQAQLXR | 2 8 0 1 | 562  | 1 | 661.8226 | 1321.631 | 2 | 36.93 | 0.0013 | GPSGSVSAQLAK  | Phospho (ST) | 0.0000001000000.0 | Synth_pep_375V.882.882.2.dta               |
| GPSGVXSQAQLXR | 1 8 8 1 | 378  | 1 | 668.8308 | 1335.647 | 2 | 36.47 | 0.0013 | GPSGSVSAQLVK  | Phospho (ST) | 0.0000001000000.0 | Synth_pep_35V.1009.1009.2.dta              |
| GPSGVXSQAQLXR | 5 3 0 1 | 1062 | 1 | 452.2305 | 1353.67  | 3 | 37.16 | 0.0013 | GPSGLVSAQLAK  | Phospho (ST) | 0.0000001000000.0 | AIC_synth_45.1528.1528.3.dta               |
| SXPFKXSPLXFRG | 9 5 6 0 | 1913 | 1 | 789.893  | 1577.772 | 2 | 32.37 | 0.0013 | SYPFKLSPLDFGR | Phospho (ST) | 0.0000001000000.0 | Synth_pep_275V.1288.1288.2.dta             |
| SXPFKXSPLXFRG | 9 3 3 0 | 1867 | 1 | 836.9013 | 1671.788 | 2 | 30.71 | 0.0013 | SYPFKSSPLFFGR | Phospho (ST) | 0.0000001000000.0 | AIC_synth_test_25.1864.1864.2.dta          |
| GPSGVXSQAQLXR | 9 3 5 1 | 1872 | 1 | 723.8575 | 1445.701 | 2 | 35.81 | 0.0013 | GPSGVVSAQLLK  | Phospho (ST) | 0.0000001000000.0 | AIC_synth_test_25.1856.1856.2.dta          |
| SXPFKXSPLXFRG | 4 3 4 1 | 1870 | 1 | 724.8536 | 1447.693 | 2 | 29.53 | 0.0013 | GSPFKSPLVFGK  | Phospho (ST) | 0.0000001000000.0 | AIC_synth_test_25.1544.1544.2.dta          |
| GPSGVXSQAQLXR | 0 1 6 1 | 34   | 1 | 648.7927 | 1295.571 | 2 | 36.87 | 0.0013 | GPSGAVSQAQLSK | Phospho (ST) | 0.0000001000000.0 | Synth_pep_40V.719.719.2.dta                |
| GPSGVXSQAQLXR | 2 0 1 1 | 404  | 1 | 669.8036 | 1337.593 | 2 | 37.72 | 0.0013 | GPSGSVSAQLDK  | Phospho (ST) | 0.0000001000000.0 | AIC_synth_test_25.823.823.2.dta            |
| GPSGVXSQAQLXR | 9 5 4 1 | 1910 | 1 | 678.832  | 1355.649 | 2 | 36.59 | 0.0013 | GPSGVVSAQLGK  | Phospho (ST) | 0.0000001000000.0 | AIC_synth_test_25.1359.1359.2.dta          |
| GPSGVXSQAQLXR | 2 3 9 0 | 479  | 1 | 745.8353 | 1489.656 | 2 | 35.39 | 0.0013 | GPSGSVSAQLYR  | Phospho (ST) | 0.0000001000000.0 | Synth_pep_30V_120502214048.1147.1147.2.dta |
| SXPFKXSPLXFRG | 4 0 9 0 | 819  | 1 | 753.8633 | 1505.712 | 2 | 34.53 | 0.0012 | SXPFKSSPLVFGK | Phospho (ST) | 0.0000001000000.0 | AIC_synth_test_25.1240.1240.2.dta          |
| SXPFKXSPLXFRG | 4 2 9 0 | 859  | 1 | 522.2436 | 1563.709 | 3 | 36.75 | 0.0012 | SXPFKESPLVFGK | Phospho (ST) | 0.0000001000000.0 | Synth_pep_425V.1019.1019.3.dta             |
| SXPFKXSPLXFRG | 6 5 1 0 | 1303 | 1 | 510.9167 | 1529.728 | 3 | 36.83 | 0.0012 | SXPFKLSPLDFGR | Phospho (ST) | 0.0000001000000.0 | Synth_pep_40V.1127.1127.3.dta              |
| GPSGVXSQAQLXR | 0 5 3 1 | 108  | 1 | 677.8427 | 1353.671 | 2 | 35.03 | 0.0012 | GPSGAVSQAQLFK | Phospho (ST) | 0.0000001000000.0 | Synth_pep_325V.1360.1360.2.dta             |
| SXPFKXSPLXFRG | 8 9 9 0 | 1799 | 1 | 820.8975 | 1639.781 | 2 | 29.35 | 0.0012 | SXPFKYSPLVFGK | Phospho (ST) | 0.0000001000000.0 | Synth_pep_275V.1190.1190.2.dta             |
| SXPFKXSPLXFRG | 3 9 3 1 | 788  | 1 | 548.933  | 1643.777 | 3 | 35.42 | 0.0012 | SXPFKSSPLFFGR | Phospho (ST) | 0.0000001000000.0 | Synth_pep_425V.1243.1243.2.dta             |
| SXPFKXSPLXFRG | 2 2 8 0 | 457  | 1 | 786.876  | 1571.738 | 2 | 35.99 | 0.0012 | SXPFKESPLVFGK | Phospho (ST) | 0.0000001000000.0 | Synth_pep_275V.1020.1020.2.dta             |
| GPSGVXSQAQLXR | 8 2 6 0 | 1653 | 1 | 683.822  | 1365.629 | 2 | 35.89 | 0.0012 | GPSGVVSAQLSR  | Phospho (ST) | 0.0000001000000.0 | Synth_pep_375V.825.825.2.dta               |
| GPSGVXSQAQLXR | 4 3 5 0 | 871  | 1 | 684.8372 | 1367.66  | 2 | 35.46 | 0.0012 | GPSGSVSAQLLR  | Phospho (ST) | 0.0000001000000.0 | Synth_pep_275V.1379.1379.2.dta             |
| GPSGVXSQAQLXR | 1 9 1 1 | 384  | 1 | 708.8049 | 1415.595 | 2 | 32.58 | 0.0012 | GPSGVDVSAQLDK | Phospho (ST) | 0.0000001000000.0 | Synth_pep_30V_120502214048.803.803.2.dta   |
| GPSGVXSQAQLXR | 6 2 1 1 | 1244 | 1 | 452.2009 | 1353.581 | 3 | 34.57 | 0.0012 | GPSGSVSAQLDK  | Phospho (ST) | 0.0000001000000.0 | Synth_pep_425V.735.735.3.dta               |
| GPSGVXSQAQLXR | 5 8 1 1 | 1164 | 1 | 675.8377 | 1349.661 | 2 | 37.05 | 0.0012 | GPSGLVSAQLDK  | Phospho (ST) | 0.0000001000000.0 | AIC_synth_test_25.1339.1339.2.dta          |
| GPSGVXSQAQLXR | 1 8 3 1 | 368  | 1 | 692.8283 | 1383.642 | 2 | 37.04 | 0.0012 | GPSGVDVSAQLFK | Phospho (ST) | 0.0000001000000.0 | Synth_pep_35V.1210.1210.2.dta              |
| GPSGVXSQAQLXR | 3 2 9 0 | 659  | 1 | 745.8376 | 1489.661 | 2 | 35.76 | 0.0012 | GPSGVVSAQLYR  | Phospho (ST) | 0.0000001000000.0 | Synth_pep_325V.1076.1076.2.dta             |
| GPSGVXSQAQLXR | 6 4 3 1 | 1288 | 1 | 657.8073 | 1313.6   | 2 | 37.58 | 0.0012 | GPSGSVSAQLFK  | Phospho (ST) | 0.0000001000000.0 | Synth_pep_30V_120502214048.956.956.2.dta   |
| SXPFKXSPLXFRG | 6 9 6 0 | 1393 | 1 | 776.8618 | 1551.709 | 2 | 34.5  | 0.0012 | SXPFKYSPLDFGR | Phospho (ST) | 0.0000001000000.0 | Synth_pep_30V_120502214048.1064.1064.2.dta |
| GPSGVXSQAQLXR | 1 8 7 1 | 376  | 1 | 669.8203 | 1337.626 | 2 | 35.22 | 0.0012 | GPSGVDVSAQLTK | Phospho (ST) | 0.0000001000000.0 | Synth_pep_35V.816.816.2.dta                |
| SXPFKXSPLXFRG | 1 5 3 0 | 307  | 1 | 795.8907 | 1589.767 | 2 | 34.47 | 0.0012 | SDPFKLSPLFFGR | Phospho (ST) | 0.0000001000000.0 | Synth_pep_275V.1480.1480.2.dta             |
| SXPFKXSPLXFRG | 0 9 3 0 | 187  | 1 | 798.884  | 1595.574 | 2 | 30.5  | 0.0012 | SAPFKYSPLFFGR | Phospho (ST) | 0.0000001000000.0 | Synth_pep_275V.1252.1252.2.dta             |
| GPSGVXSQAQLXR | 8 5 2 1 | 1706 | 1 | 682.845  | 1363.676 | 2 | 36.5  | 0.0012 | GPSGVVSAQLLEK | Phospho (ST) | 0.0000001000000.0 | Synth_pep_275V.1162.1162.2.dta             |
| SXPFKXSPLXFRG | 4 3 2 1 | 866  | 1 | 507.5765 | 1519.708 | 3 | 36.45 | 0.0012 | SXPFKSSPLVFGK | Phospho (ST) | 0.0000001000000.0 | AIC_synth_45.1421.1421.3.dta               |
| GPSGVXSQAQLXR | 5 5 9 1 | 1120 | 1 | 706.8632 | 1411.712 | 2 | 35.79 | 0.0011 | GPSGLVSAQLYK  | Phospho (ST) | 0.0000001000000.0 | Synth_pep_275V.1392.1392.2.dta             |
| SXPFKXSPLXFRG | 4 9 9 1 | 1000 | 1 | 524.249  | 1569.725 | 3 | 36.62 | 0.0011 | SXPFKYSPLVFGK | Phospho (ST) | 0.0000001000000.0 | Synth_pep_40V.1045.1045.3.dta              |
| SXPFKXSPLXFRG | 2 9 1 0 | 583  | 1 | 541.5792 | 1621.716 | 3 | 34.71 | 0.0011 | SXPFKLSPLDFGR | Phospho (ST) | 0.0000001000000.0 | Synth_pep_40V.1040.1040.3.dta              |
| SXPFKXSPLXFRG | 3 8 1 0 | 763  | 1 | 526.2558 | 1575.746 | 3 | 34.32 | 0.0011 | SXPFKLSPLDFGR | Phospho (ST) | 0.0000001000000.0 | Synth_pep_40V.1200.1200.3.dta              |
| GPSGVXSQAQLXR | 9 4 2 1 | 1886 | 1 | 458.2091 | 1371.606 | 3 | 38.14 | 0.0011 | GPSGVVSAQLLEK | Phospho (ST) | 0.0000001000000.0 | Synth_pep_425V.787.787.3.dta               |
| SXPFKXSPLXFRG | 7 5 2 1 | 1506 | 1 | 510.9245 | 1529.572 | 3 | 31.63 | 0.0011 | STPFKLSPLVFGK | Phospho (ST) | 0.0000001000000.0 | AIC_synth_45.1373.1373.3.dta               |
| GPSGVXSQAQLXR | 5 9 3 1 | 1188 | 1 | 723.8558 | 1445.697 | 2 | 37.24 | 0.0011 | GPSGLVSAQLFK  | Phospho (ST) | 0.0000001000000.0 | Synth_pep_375V.1281.1281.2.dta             |
| SXPFKXSPLXFRG | 5 7 9 1 | 1160 | 1 | 522.2664 | 1563.777 | 3 | 32.45 | 0.0011 | SLPFKSSPLVFGK | Phospho (ST) | 0.0000001000000.0 | Synth_pep_375V.1076.1076.3.dta             |
| SXPFKXSPLXFRG | 3 1 3 1 | 628  | 1 | 532.9224 | 1595.745 | 3 | 31.6  | 0.0011 | SXPFKSSPLFFGR | Phospho (ST) | 0.0000001000000.0 | AIC_synth_45.1708.1708.3.dta               |
| GPSGVXSQAQLXR | 9 9 9 1 | 2000 | 1 | 756.8422 | 1511.67  | 2 | 37.87 | 0.0011 | GPSGVVSAQLYK  | Phospho (ST) | 0.0000001000000.0 | Synth_pep_35V.1032.1032.2.dta              |
| GPSGVXSQAQLXR | 8 0 6 1 | 1614 | 1 | 640.8156 | 1279.617 | 2 | 34.34 | 0.0011 | GPSGSVSAQLSK  | Phospho (ST) | 0.0000001000000.0 | Synth_pep_30V_120502214048.824.824.2.dta   |
| SXPFKXSPLXFRG | 0 5 6 1 | 114  | 1 | 486.9182 | 1457.733 | 3 | 37.04 | 0.0011 | SAPFKLSPLFFGR | Phospho (ST) | 0.0000001000000.0 | AIC_synth_45.1345.1345.3.dta               |
| GPSGVXSQAQLXR | 5 9 2 1 | 1186 | 1 | 714.8441 | 1427.674 | 2 | 35.22 | 0.0011 | GPSGVVSAQLLEK | Phospho (ST) | 0.0000001000000.0 | Synth_pep_30V_120502214048.1130.1130.2.dta |
| GPSGVXSQAQLXR | 2 4 4 1 | 490  | 1 | 633.7924 | 1265.57  | 2 | 40.62 | 0.0011 | GPSGLVSAQLGK  | Phospho (ST) | 0.0000001000000.0 | Synth_pep_325V.722.722.2.dta               |
| GPSGVXSQAQLXR | 6 9 8 1 | 1398 | 1 | 686.8298 | 1371.645 | 2 | 39.85 | 0.0011 | GPSGSVSAQLVK  | Phospho (ST) | 0.0000001000000.0 | Synth_pep_35V.944.944.2.dta                |
| SXPFKXSPLXFRG | 6 8 4 1 | 1370 | 1 | 477.5734 | 1429.698 | 3 | 37.11 | 0.0011 | SXPFKYSPLVFGK | Phospho (ST) | 0.0000001000000.0 | AIC_synth_45.1205.1205.3.dta               |
| GPSGVXSQAQLXR | 8 9 6 1 | 1794 | 1 | 686.8304 | 1371.646 | 2 | 39.93 | 0.0011 | GPSGVVSAQLSK  | Phospho (ST) | 0.0000001000000.0 | Synth_pep_375V.917.917.2.dta               |
| GPSGVXSQAQLXR | 6 8 9 0 | 1379 | 1 | 700.829  | 1399.644 | 2 | 36.37 | 0.0011 | GPSGVVSAQLYR  | Phospho (ST) | 0.0000001000000.0 | Synth_pep_35V.960.960.2.dta                |
| SXPFKXSPLXFRG | 2 2 2 1 | 446  | 1 | 525.5758 | 1573.706 | 3 | 31.78 | 0.0011 | SXPFKESPLVFGK | Phospho (ST) | 0.0000001000000.0 | AIC_synth_45.1028.1028.3.dta               |
| GPSGVXSQAQLXR | 5 5 8 1 | 1118 | 1 | 674.8677 | 1347.721 | 2 | 34.79 | 0.0011 | GPSGLVSAQLVK  | Phospho (ST) | 0.0000001000000.0 | Synth_pep_325V.1437.1437.2.dta             |
| SXPFKXSPLXFRG | 9 9 9 1 | 2000 | 1 | 838.8899 | 1675.765 | 2 | 29.79 | 0.0011 | SYPFKYSPLVFGK | Phospho (ST) | 0.0000001000000.0 | Synth_pep_40V.1073.1073.2.dta              |
| SXPFKXSPLXFRG | 1 5 1 0 | 303  | 1 | 779.8669 | 1557.719 | 2 | 37.59 | 0.0011 | SDPFKLSPLDFGR | Phospho (ST) | 0.0000001000000.0 | Synth_pep_30V_120502214048.1265.1265.2.dta |
| SXPFKXSPLXFRG | 0 5 5 1 | 112  | 1 | 495.6023 | 1483.785 | 3 | 33.73 | 0.0011 | SAPFKLSPLVFGK | Phospho (ST) | 0.0000001000000.0 | AIC_synth_45.1589.1589.3.dta               |
| GPSGVXSQAQLXR | 0 5 5 1 | 112  | 1 | 440.902  | 1319.684 | 3 | 35.12 | 0.0011 | GPSGAVSQAQLLK | Phospho (ST) | 0.0000001000000.0 | AIC_synth_45.1590.1590.3.dta               |
| GPSGVXSQAQLXR | 9 1 7 0 | 1835 | 1 | 715.8176 | 1429.621 | 2 | 36.32 | 0.0011 | GPSGVVSAQLTR  | Phospho (ST) | 0.0000001000000.0 | AIC_synth_test_25.919.919.2.dta            |
| SXPFKXSPLXFRG | 2 9 2 0 | 585  | 1 | 818.8742 | 1635.734 | 2 | 34.08 | 0.0011 | SXPFKSSPLFFGR | Phospho (ST) | 0.0000001000000.0 | Synth_pep_275V.1124.112                    |



|                            |   |          |          |   |       |         |                |              |                   |                                            |
|----------------------------|---|----------|----------|---|-------|---------|----------------|--------------|-------------------|--------------------------------------------|
| GPSGXVSAQQLXR 0 9 0 1 182  | 1 | 664.8166 | 1327.619 | 2 | 37.29 | 0.00092 | GPSGAVSQAQLAK  | Phospho (ST) | 0.0000001000000.0 | Synth_pep_325V.889.889.2.dta               |
| GPSGXVSAQQLXR 7 3 1 1748   | 1 | 709.8405 | 1417.666 | 2 | 37.17 | 0.00092 | GPSGVSTAQLFK   | Phospho (ST) | 0.0000001000000.0 | Synth_pep_30V_120502214048.1250.1250.2.dta |
| GPSGXVSAQQLXR 9 5 9 1 1920 | 1 | 731.8552 | 1461.696 | 2 | 38.55 | 0.00092 | GPSGVVSLAQLYK  | Phospho (ST) | 0.0000001000000.0 | Synth_pep_30V_120502214048.1226.1226.2.dta |
| GPSGXVSAQQLXR 0 2 1 0 143  | 1 | 683.8058 | 1365.597 | 2 | 38.58 | 0.00091 | GPSGAVSQAQLDR  | Phospho (ST) | 0.0000001000000.0 | AIC_synth_test_25.825.825.2.dta            |
| GPSGXVSAQQLXR 0 0 0 1 42   | 1 | 618.8038 | 1235.593 | 2 | 30.4  | 0.00091 | GPSGAVSQAQLAK  | Phospho (ST) | 0.0000001000000.0 | Synth_pep_35V.818.818.2.dta                |
| SXPFKXSPFLXFR 2 3 0 0 461  | 1 | 781.871  | 1561.728 | 2 | 35.78 | 0.00091 | SEPFKSPFLAFGR  | Phospho (ST) | 0.0000001000000.0 | Synth_pep_275V.1274.1274.2.dta             |
| GPSGXVSAQQLXR 5 5 5 1 1112 | 1 | 454.9181 | 1361.733 | 3 | 33.97 | 0.0009  | GPSGLVSLAQLLK  | Phospho (ST) | 0.0000001000000.0 | AIC_synth_45.1872.1872.3.dta               |
| SXPFKXSPFLXFR 4 6 4 1 930  | 1 | 463.5581 | 1387.653 | 3 | 39.25 | 0.0009  | SXPFKXSPFLFGK  | Phospho (ST) | 0.0000001000000.0 | Synth_pep_40V.857.857.3.dta                |
| GPSGXVSAQQLXR 0 4 4 0 89   | 1 | 618.7903 | 1235.566 | 2 | 42.8  | 0.0009  | GPSGAVSQAQLGR  | Phospho (ST) | 0.0000001000000.0 | Synth_pep_35V.748.748.2.dta                |
| SXPFKXSPFLXFR 9 9 2 0 1985 | 1 | 835.885  | 1669.756 | 2 | 30.69 | 0.0009  | SXPFKXSPFLFGR  | Phospho (ST) | 0.0000001000000.0 | AIC_synth_test_25.1439.1439.2.dta          |
| GPSGXVSAQQLXR 2 1 2 1 426  | 1 | 698.8034 | 1395.592 | 2 | 43.07 | 0.0008  | GPSGLVSLAQLK   | Phospho (ST) | 0.0000001000000.0 | Synth_pep_325V.736.736.2.dta               |
| GPSGXVSAQQLXR 8 2 1 0 1660 | 1 | 707.8364 | 1413.658 | 2 | 38.02 | 0.0009  | GPSGVVSEAQLYK  | Phospho (ST) | 0.0000001000000.0 | Synth_pep_35V.930.930.2.dta                |
| SXPFKXSPFLXFR 1 3 1 0 263  | 1 | 531.5768 | 1591.709 | 3 | 36.92 | 0.00088 | SDPFKSPDLFGR   | Phospho (ST) | 0.0000001000000.0 | AIC_synth_45.1581.1581.3.dta               |
| GPSGXVSAQQLXR 9 4 2 1 1886 | 1 | 686.8123 | 1371.61  | 2 | 38.94 | 0.00088 | GPSGVVSGAQLK   | Phospho (ST) | 0.0000001000000.0 | AIC_synth_test_25.882.882.2.dta            |
| GPSGXVSAQQLXR 3 3 9 1 680  | 1 | 740.8459 | 1479.677 | 2 | 40.3  | 0.00088 | GPSGVVSTAQLYK  | Phospho (ST) | 0.0000001000000.0 | Synth_pep_30V_120502214048.1337.1337.2.dta |
| GPSGXVSAQQLXR 6 3 9 1 1280 | 1 | 710.8286 | 1419.643 | 2 | 39.02 | 0.00088 | GPSGVVSTAQLYK  | Phospho (ST) | 0.0000001000000.0 | Synth_pep_30V.1106.1106.2.dta              |
| GPSGXVSAQQLXR 5 0 1 1 1004 | 1 | 661.8221 | 1321.63  | 2 | 38.54 | 0.00088 | GPSGLVSLAQLDK  | Phospho (ST) | 0.0000001000000.0 | Synth_pep_30V_120502214048.948.948.2.dta   |
| GPSGXVSAQQLXR 9 6 3 1 1928 | 1 | 710.8292 | 1419.644 | 2 | 39.72 | 0.00088 | GPSGVVSSAQLK   | Phospho (ST) | 0.0000001000000.0 | Synth_pep_275V.1115.1115.2.dta             |
| GPSGXVSAQQLXR 3 7 3 1 1748 | 1 | 709.841  | 1417.668 | 2 | 37.38 | 0.00088 | GPSGVSTAQLFK   | Phospho (ST) | 0.0000001000000.0 | Synth_pep_325V.1212.1212.2.dta             |
| GPSGXVSAQQLXR 1 3 5 1 272  | 1 | 699.8384 | 1397.662 | 2 | 37.9  | 0.00088 | GPSGDVSTAQLLK  | Phospho (ST) | 0.0000001000000.0 | Synth_pep_325V.1247.1247.2.dta             |
| GPSGXVSAQQLXR 5 4 5 1 1092 | 1 | 653.8417 | 1305.669 | 2 | 36.98 | 0.00087 | GPSGLVSLAQLLK  | Phospho (ST) | 0.0000001000000.0 | Synth_pep_30V_120502214048.1261.1261.2.dta |
| GPSGXVSAQQLXR 4 3 3 1 868  | 1 | 687.8252 | 1373.636 | 2 | 39.17 | 0.00087 | GPSGVVSTAQLFK  | Phospho (ST) | 0.0000001000000.0 | Synth_pep_30V_120502214048.1354.1354.2.dta |
| GPSGXVSAQQLXR 9 9 9 1 2000 | 1 | 756.8416 | 1511.669 | 2 | 38.27 | 0.00085 | GPSGVVSTAQLYK  | Phospho (ST) | 0.0000001000000.0 | Synth_pep_30V.1041.1041.2.dta              |
| GPSGXVSAQQLXR 0 3 9 1 80   | 1 | 702.8314 | 1403.648 | 2 | 39.03 | 0.00084 | GPSGAVSQAQLYK  | Phospho (ST) | 0.0000001000000.0 | Synth_pep_35V.1104.1104.2.dta              |
| GPSGXVSAQQLXR 3 9 7 1 796  | 1 | 717.8365 | 1433.658 | 2 | 41.21 | 0.00084 | GPSGVVSTAQLYK  | Phospho (ST) | 0.0000001000000.0 | Synth_pep_30V_120502214048.1110.1110.2.dta |
| SXPFKXSPFLXFR 6 9 5 1 1392 | 1 | 517.5938 | 1549.759 | 3 | 37.05 | 0.00083 | SEPFKXSPFLFGK  | Phospho (ST) | 0.0000001000000.0 | AIC_synth_45.1356.1356.3.dta               |
| GPSGXVSAQQLXR 6 5 1 1 1304 | 1 | 669.8215 | 1337.628 | 2 | 38.09 | 0.00082 | GPSGLVSLAQLDK  | Phospho (ST) | 0.0000001000000.0 | AIC_synth_test_25.983.983.2.dta            |
| GPSGXVSAQQLXR 5 6 5 1 1132 | 1 | 668.8465 | 1335.678 | 2 | 37.81 | 0.00082 | GPSGLVSLAQLLK  | Phospho (ST) | 0.0000001000000.0 | Synth_pep_30V_120502214048.1264.1264.2.dta |
| SXPFKXSPFLXFR 3 8 0 1 762  | 1 | 502.2589 | 1503.755 | 3 | 33.39 | 0.00082 | SXPFKXSPFLAFGR | Phospho (ST) | 0.0000001000000.0 | Synth_pep_375V.1165.1165.2.dta             |
| SXPFKXSPFLXFR 0 2 5 1 52   | 1 | 750.879  | 1499.744 | 2 | 38.28 | 0.00082 | SDPFKXSPFLFGK  | Phospho (ST) | 0.0000001000000.0 | Synth_pep_275V.1050.1050.3.dta             |
| GPSGXVSAQQLXR 1 9 9 1 400  | 1 | 732.8249 | 1463.635 | 2 | 38.04 | 0.00082 | GPSGDVSTAQLYK  | Phospho (ST) | 0.0000001000000.0 | Synth_pep_375V.922.922.2.dta               |
| GPSGXVSAQQLXR 3 5 9 1 720  | 1 | 723.8558 | 1445.697 | 2 | 38.5  | 0.00081 | GPSGVVSTAQLYK  | Phospho (ST) | 0.0000001000000.0 | Synth_pep_35V.1264.1264.2.dta              |
| GPSGXVSAQQLXR 5 9 0 0 1181 | 1 | 699.8407 | 1397.667 | 2 | 38.26 | 0.00081 | GPSGVVSTAQLAR  | Phospho (ST) | 0.0000001000000.0 | Synth_pep_375V.1073.1073.2.dta             |
| SXPFKXSPFLXFR 2 6 0 1 522  | 1 | 492.2374 | 1473.69  | 3 | 39    | 0.00081 | SEPFKXSPFLAFGR | Phospho (ST) | 0.0000001000000.0 | Synth_pep_40V.872.872.3.dta                |
| SXPFKXSPFLXFR 2 2 8 0 457  | 1 | 524.9198 | 1571.738 | 3 | 37.72 | 0.00081 | SEPFKXSPFLVFR  | Phospho (ST) | 0.0000001000000.0 | AIC_synth_45.1117.1117.3.dta               |
| SXPFKXSPFLXFR 4 2 8 0 857  | 1 | 500.9123 | 1499.715 | 3 | 39.58 | 0.00081 | SGPFKXSPFLVFR  | Phospho (ST) | 0.0000001000000.0 | Synth_pep_425V.947.947.3.dta               |
| GPSGXVSAQQLXR 1 3 3 1 268  | 1 | 716.8284 | 1431.642 | 2 | 39.2  | 0.00081 | GPSGDVSTAQLFK  | Phospho (ST) | 0.0000001000000.0 | Synth_pep_35V.1298.1298.2.dta              |
| GPSGXVSAQQLXR 0 4 6 1 94   | 1 | 619.7937 | 1237.573 | 2 | 38.23 | 0.0008  | GPSGAVSQAQLSK  | Phospho (ST) | 0.0000001000000.0 | Synth_pep_30V_120502214048.714.714.2.dta   |
| SXPFKXSPFLXFR 5 5 0 0 1101 | 1 | 504.9362 | 1511.787 | 3 | 34.82 | 0.00079 | SLPFKXSPFLAFGR | Phospho (ST) | 0.0000001000000.0 | Synth_pep_375V.1209.1209.3.dta             |
| SXPFKXSPFLXFR 0 9 9 0 199  | 1 | 806.882  | 1611.749 | 2 | 34.81 | 0.00079 | SAPFKXSPFLYFR  | Phospho (ST) | 0.0000001000000.0 | AIC_synth_test_25.1384.1384.2.dta          |
| GPSGXVSAQQLXR 9 7 8 0 1957 | 1 | 472.2306 | 1413.67  | 3 | 37.12 | 0.00079 | GPSGVVSTAQLVR  | Phospho (ST) | 0.0000001000000.0 | Synth_pep_375V.1304.1304.3.dta             |
| GPSGXVSAQQLXR 2 0 2 0 405  | 1 | 690.8114 | 1379.608 | 2 | 37.67 | 0.00079 | GPSGAVSQAQLER  | Phospho (ST) | 0.0000001000000.0 | Synth_pep_325V.794.794.2.dta               |
| GPSGXVSAQQLXR 9 6 1 1 1924 | 1 | 694.8094 | 1387.604 | 2 | 38.78 | 0.00079 | GPSGVVSSAQLDK  | Phospho (ST) | 0.0000001000000.0 | Synth_pep_275V.816.816.2.dta               |
| SXPFKXSPFLXFR 0 9 9 1 200  | 1 | 528.9216 | 1583.743 | 3 | 37.47 | 0.00078 | SAPFKXSPFLYFR  | Phospho (ST) | 0.0000001000000.0 | Synth_pep_35V.1045.1045.3.dta              |
| SXPFKXSPFLXFR 6 9 9 1 1400 | 1 | 534.2526 | 1599.736 | 3 | 35.17 | 0.00078 | SSPFKXSPFLYFR  | Phospho (ST) | 0.0000001000000.0 | Synth_pep_425V.1036.1036.3.dta             |
| SXPFKXSPFLXFR 0 0 8 0 17   | 1 | 728.873  | 1455.731 | 2 | 36.44 | 0.00078 | SAPFKXSPFLVFR  | Phospho (ST) | 0.0000001000000.0 | AIC_synth_test_25.1239.1239.2.dta          |
| GPSGXVSAQQLXR 1 0 1 1 204  | 1 | 662.7899 | 1323.565 | 2 | 40.39 | 0.00078 | GPSGDVSSAQLDK  | Phospho (ST) | 0.0000001000000.0 | Synth_pep_30V_120502214048.778.778.2.dta   |
| GPSGXVSAQQLXR 9 3 3 1 1868 | 1 | 740.8463 | 1479.678 | 2 | 40.88 | 0.00077 | GPSGVVSTAQLFK  | Phospho (ST) | 0.0000001000000.0 | Synth_pep_325V.1385.1385.2.dta             |
| SXPFKXSPFLXFR 0 3 1 0 63   | 1 | 774.8638 | 1547.713 | 2 | 37.46 | 0.00077 | SAPFKXSPDLFGR  | Phospho (ST) | 0.0000001000000.0 | Synth_pep_30V_120502214048.1241.1241.2.dta |
| SXPFKXSPFLXFR 5 6 2 0 1125 | 1 | 772.8793 | 1543.744 | 2 | 38.68 | 0.00077 | SLPFKXSPFLFGR  | Phospho (ST) | 0.0000001000000.0 | Synth_pep_275V.1089.1089.2.dta             |
| GPSGXVSAQQLXR 2 5 0 0 501  | 1 | 682.8298 | 1363.645 | 2 | 38.12 | 0.00077 | GPSGLVSLAQLAR  | Phospho (ST) | 0.0000001000000.0 | Synth_pep_325V.1031.1031.2.dta             |
| GPSGXVSAQQLXR 0 3 3 1 68   | 1 | 694.8331 | 1387.652 | 2 | 40.01 | 0.00076 | GPSGVVSTAQLFK  | Phospho (ST) | 0.0000001000000.0 | Synth_pep_30V_120502214048.1368.1368.2.dta |
| GPSGXVSAQQLXR 8 4 6 0 1693 | 1 | 647.8087 | 1293.603 | 2 | 41.11 | 0.00076 | GPSGVVSSAQLSR  | Phospho (ST) | 0.0000001000000.0 | AIC_synth_test_25.863.863.2.dta            |
| SXPFKXSPFLXFR 5 3 2 1 1066 | 1 | 526.2628 | 1575.766 | 3 | 33.89 | 0.00076 | SLPFKXSPFLFGR  | Phospho (ST) | 0.0000001000000.0 | Synth_pep_425V.1273.1273.3.dta             |
| GPSGXVSAQQLXR 1 4 3 1 288  | 1 | 671.8043 | 1341.594 | 2 | 39.89 | 0.00075 | GPSGDVSSAQLFK  | Phospho (ST) | 0.0000001000000.0 | Synth_pep_325V.975.975.2.dta               |
| SXPFKXSPFLXFR 5 3 5 1 1072 | 1 | 520.946  | 1559.816 | 3 | 31.29 | 0.00074 | SLPFKXSPFLFGR  | Phospho (ST) | 0.0000001000000.0 | Synth_pep_425V.1371.1371.3.dta             |
| SXPFKXSPFLXFR 5 3 2 0 1065 | 1 | 802.894  | 1603.774 | 2 | 35.27 | 0.00074 | SLPFKXSPFLFGR  | Phospho (ST) | 0.0000001000000.0 | Synth_pep_30V_120502214048.1326.1326.2.dta |
| GPSGXVSAQQLXR 0 2 0 0 41   | 1 | 661.8091 | 1321.604 | 2 | 35.68 | 0.00074 | GPSGAVSQAQLAR  | Phospho (ST) | 0.0000001000000.0 | Synth_pep_375V.768.768.2.dta               |
| GPSGXVSAQQLXR 1 3 2 1 266  | 1 | 707.8131 | 1413.612 | 2 | 37.31 | 0.00074 | GPSGDVSTAQLK   | Phospho (ST) | 0.0000001000000.0 | Synth_pep_30V_120502214048.1041.1041.2.dta |
| GPSGXVSAQQLXR 8 3 0 1 1662 | 1 | 670.8337 | 1339.653 | 2 | 40.86 | 0.00074 | GPSGVVSTAQLAK  | Phospho (ST) | 0.0000001000000.0 | Synth_pep_30V_120502214048.1169.1169.2.dta |
| GPSGXVSAQQLXR 4 0 4 0 809  | 1 | 618.7895 | 1235.565 | 2 | 43.76 | 0.00073 | GPSGVVSSAQLGR  | Phospho (ST) | 0.0000001000000.0 | Synth_pep_30V_120502214048.762.762.2.dta   |
| SXPFKXSPFLXFR 1 0 0 0 201  | 1 | 491.5692 | 1471.686 | 3 | 38.59 | 0.00073 | SDPFKXSPFLAFGR | Phospho (ST) | 0.0000001000000.0 | Synth_pep_375V.985.985.3.dta               |
| GPSGXVSAQQLXR 2 1 2 0 425  | 1 | 712.809  | 1423.603 | 2 | 39.2  | 0.00072 | GPSGVVSSAQLER  | Phospho (ST) | 0.0000001000000.0 | AIC_synth_test_25.819.819.2.dta            |
| SXPFKXSPFLXFR 9 9 3 1 1988 | 1 | 554.2648 | 1659.773 | 3 | 35.24 | 0.00072 | SXPFKXSPFLFGK  | Phospho (ST) | 0.0000001000000.0 | AIC_synth_45.1484.1484.3.dta               |
| GPSGXVSAQQLXR 5 1 6 0 1033 | 1 | 683.8217 | 1365.629 | 2 | 37.98 | 0.00072 | GPSGLVSDAQLSR  | Phospho (ST) | 0.0000001000000.0 | Synth_pep_35V.914.914.2.dta                |
| GPSGXVSAQQLXR 9 4 2 1 1886 | 1 | 686.8093 | 1371.604 | 2 | 38.21 | 0.00072 | GPSGVVSSAQLK   | Phospho (ST) | 0.0000001000000.0 | Synth_pep_30V_120502214048.785.785.2.dta   |
| GPSGXVSAQQLXR 1 5 8 1 318  | 1 | 675.839  | 1349.664 | 2 | 39.29 | 0.00072 | GPSGDVSLAQLVK  | Phospho (ST) | 0.0000001000000.0 | Synth_pep_325V.1162.1162.2.dta             |
| GPSGXVSAQQLXR 5 1 8 1 1038 | 1 | 675.838  | 1349.662 | 2 | 39.32 | 0.00072 | GPSGLVSDAQLVK  | Phospho (ST) | 0.0000001000000.0 | Synth_pep_275V.1048.1048.2.dta             |
| GPSGXVSAQQLXR 9 0 6 0 1813 | 1 | 686.8148 | 1371.615 | 2 | 38.96 | 0.00072 | GPSGVVSSAQLSR  | Phospho (ST) | 0.0000001000000.0 | AIC_synth_test_25.999.999.2.dta            |
| GPSGXVSAQQLXR 9 4 2 1 1886 | 1 | 686.8112 | 1371.608 | 2 | 39.87 | 0.00071 | GPSGVVSSAQLK   | Phospho (ST) | 0.0000001000000.0 | Synth_pep_325V.879.879.2.dta               |
| GPSGXVSAQQLXR 1 1 0 0 221  | 1 | 676.7933 | 1351.572 | 2 | 37.68 | 0.00071 | GPSGDVSDAQLAR  | Phospho (ST) | 0.0000001000000.0 | Synth_pep_35V.760.760.2.dta                |
| GPSGXVSAQQLXR 3 3 9 1 680  | 1 | 740.8474 | 1479.68  | 2 | 41.42 | 0.00071 | GPSGVVSTAQLYK  | Phospho (ST) | 0.0000001000000.0 | Synth_pep_275V.1149.1149.2.dta             |
| GPSGXVSAQQLXR 0 3 8 0 77   | 1 | 684.8374 | 1367.66  | 2 | 37.73 | 0.00071 | GPSGAVSQAQLVR  | Phospho (ST) | 0.0000001000000.0 | Synth_pep_325V.1159.1159.2.dta             |
| SXPFKXSPFLXFR 5 3 0 0 1061 | 1 | 516.2649 | 1545.773 | 3 | 34.1  | 0.0007  | SLPFKXSPFLAFGR | Phospho (ST) | 0.0000001000000.0 | Synth_pep_40V.1233.1233.3.dta              |
| GPSGXVSAQQLXR 9 5 8 1 1918 | 1 | 699.8561 | 1397.698 | 2 | 38.52 | 0.0007  | GPSGVVSLAQLVK  | Phospho (ST) | 0.0000001000000.0 | Synth_pep_275V.1320.1320.2.dta             |
| SXPFKXSPFLXFR 1 8 6 0 373  | 1 | 506.2435 | 1515.709 | 3 | 36.74 | 0.0007  | SDPFKXSPFLFGR  | Phospho (ST) | 0.0000001000000.0 | AIC_synth_45.1342.1342.3.dta               |
| GPSGXVSAQQLXR 3 9 9 1 800  | 1 | 748.8446 | 1495.675 |   |       |         |                |              |                   |                                            |

|                           |   |          |          |   |       |         |               |              |                   |                                            |
|---------------------------|---|----------|----------|---|-------|---------|---------------|--------------|-------------------|--------------------------------------------|
| GPSGVXSAQLXR 2 9 6 1 594  | 1 | 701.8163 | 1401.618 | 2 | 41.66 | 0.00063 | GPSGEVSYAQLSK | Phospho (ST) | 0.0000001000000.0 | Synth_pep_375V.820.820.2.dta               |
| GPSGVXSAQLXR 5 3 5 0 1071 | 1 | 712.8709 | 1423.727 | 2 | 32.11 | 0.00062 | GPSGLVSAQLLR  | Phospho (ST) | 0.0000001000000.0 | AIC_synth_test_25.2031.2031.2.dta          |
| GPSGVXSAQLXR 5 2 0 1105   | 1 | 703.857  | 1405.699 | 2 | 38.01 | 0.00062 | GPSGLVSAQLLR  | Phospho (ST) | 0.0000001000000.0 | AIC_synth_test_25.1611.1611.2.dta          |
| GPSGVXSAQLXR 0 3 9 1 80   | 1 | 702.8317 | 1403.649 | 2 | 40.38 | 0.00062 | GPSGAVSFAQLYK | Phospho (ST) | 0.0000001000000.0 | Synth_pep_375V.1082.1082.2.dta             |
| GPSGVXSAQLXR 4 4 3 1 888  | 1 | 642.8028 | 1283.591 | 2 | 38.12 | 0.00062 | GPSGVSQAQLFK  | Phospho (ST) | 0.0000001000000.0 | Synth_pep_35V.955.955.2.dta                |
| GPSGVXSAQLXR 1 3 2 2 266  | 1 | 707.8159 | 1413.617 | 2 | 38.95 | 0.00062 | GPSGVSFAQLK   | Phospho (ST) | 0.0000001000000.0 | Synth_pep_35V.1000.1000.2.dta              |
| GPSGVXSAQLXR 1 4 9 1 300  | 1 | 679.8022 | 1357.59  | 2 | 38.67 | 0.00062 | GPSGVSQAQLYK  | Phospho (ST) | 0.0000001000000.0 | Synth_pep_35V.795.795.2.dta                |
| SXPFKXSLXFR 9 9 3 0 1987  | 1 | 844.8974 | 1687.78  | 2 | 34.24 | 0.00062 | SYPFKKSPFLFGR | Phospho (ST) | 0.0000001000000.0 | Synth_pep_275V.1316.1316.2.dta             |
| GPSGVXSAQLXR 4 1 1 1 824  | 1 | 655.7834 | 1309.552 | 2 | 39.33 | 0.00062 | GPSGVSQAQLDK  | Phospho (ST) | 0.0000001000000.0 | Synth_pep_35V.736.736.2.dta                |
| SXPFKXSLXFR 4 6 9 1 940   | 1 | 498.9055 | 1493.695 | 3 | 41.84 | 0.00061 | SXPFKXSLXFR   | Phospho (ST) | 0.0000001000000.0 | AIC_synth_45.1045.1045.3.dta               |
| GPSGVXSAQLXR 0 0 4 1 10   | 1 | 611.7957 | 1221.577 | 2 | 32.17 | 0.00061 | GPSGVSAAQLGK  | Phospho (ST) | 0.0000001000000.0 | Synth_pep_325V.800.800.2.dta               |
| GPSGVXSAQLXR 0 2 6 1 54   | 1 | 655.8029 | 1309.591 | 2 | 38.77 | 0.00061 | GPSGVSQAQLSK  | Phospho (ST) | 0.0000001000000.0 | Synth_pep_40V.735.735.2.dta                |
| GPSGVXSAQLXR 8 5 6 1 1714 | 1 | 661.8414 | 1321.668 | 2 | 39.6  | 0.00061 | GPSGVSQAQLSK  | Phospho (ST) | 0.0000001000000.0 | Synth_pep_35V.1066.1066.2.dta              |
| GPSGVXSAQLXR 4 9 8 1 998  | 1 | 671.8246 | 1341.635 | 2 | 38.06 | 0.00061 | GPSGVSQAQLVK  | Phospho (ST) | 0.0000001000000.0 | Synth_pep_30V_120502214048.968.968.2.dta   |
| GPSGVXSAQLXR 8 9 9 1 1800 | 1 | 724.8449 | 1447.675 | 2 | 42.58 | 0.0006  | GPSGVSQAQLYK  | Phospho (ST) | 0.0000001000000.0 | Synth_pep_35V.1041.1041.2.dta              |
| SXPFKXSLXFR 1 5 0 0 301   | 1 | 505.5831 | 1513.728 | 3 | 41.59 | 0.0006  | SDFPKLSPLAFGR | Phospho (ST) | 0.0000001000000.0 | Synth_pep_40V.1152.1152.3.dta              |
| GPSGVXSAQLXR 3 8 3 1 768  | 1 | 472.9022 | 1415.685 | 3 | 41.37 | 0.00059 | GPSGVSQAQLFK  | Phospho (ST) | 0.0000001000000.0 | Synth_pep_375V.1354.1354.3.dta             |
| SXPFKXSLXFR 2 4 2 1 486   | 1 | 501.5669 | 1501.685 | 3 | 39.69 | 0.00059 | SDFPKLSPLFGR  | Phospho (ST) | 0.0000001000000.0 | AIC_synth_45.996.996.3.dta                 |
| SXPFKXSLXFR 7 8 9 1 1580  | 1 | 517.5928 | 1549.577 | 3 | 38.38 | 0.00059 | SDFPKLSPLFGR  | Phospho (ST) | 0.0000001000000.0 | Synth_pep_425V.1051.1051.3.dta             |
| GPSGVXSAQLXR 2 8 7 1 576  | 1 | 676.8267 | 1351.639 | 2 | 39.66 | 0.00059 | GPSGVSQAQLTK  | Phospho (ST) | 0.0000001000000.0 | Synth_pep_35V.904.904.2.dta                |
| GPSGVXSAQLXR 3 3 5 1 672  | 1 | 715.8573 | 1429.7   | 2 | 39.94 | 0.00058 | GPSGVSQAQLLK  | Phospho (ST) | 0.0000001000000.0 | Synth_pep_325V.1432.1432.2.dta             |
| SXPFKXSLXFR 1 5 5 1 312   | 1 | 510.2665 | 1527.773 | 3 | 38.75 | 0.00058 | SDFPKLSPLFGR  | Phospho (ST) | 0.0000001000000.0 | AIC_synth_45.1692.1692.3.dta               |
| SXPFKXSLXFR 4 3 1 0 863   | 1 | 512.2413 | 1533.702 | 3 | 34.92 | 0.00058 | SDFPKLSPLFGR  | Phospho (ST) | 0.0000001000000.0 | Synth_pep_325V.1169.1169.3.dta             |
| SXPFKXSLXFR 6 6 0 1 1322  | 1 | 478.2337 | 1431.679 | 3 | 39.68 | 0.00057 | SDFPKLSPLAFGR | Phospho (ST) | 0.0000001000000.0 | AIC_synth_45.975.975.3.dta                 |
| SXPFKXSLXFR 4 0 1 1 804   | 1 | 477.5643 | 1429.671 | 3 | 42.53 | 0.00057 | SDFPKLSPLDFGR | Phospho (ST) | 0.0000001000000.0 | AIC_synth_45.1084.1084.3.dta               |
| SXPFKXSLXFR 6 5 3 1 1308  | 1 | 512.2615 | 1533.763 | 3 | 38.65 | 0.00057 | SDFPKLSPLFGR  | Phospho (ST) | 0.0000001000000.0 | Synth_pep_40V.1223.1223.3.dta              |
| GPSGVXSAQLXR 0 2 0 0 41   | 1 | 441.5451 | 1321.601 | 3 | 36.56 | 0.00057 | GPSGVSQAQLAR  | Phospho (ST) | 0.0000001000000.0 | Synth_pep_425V.793.793.3.dta               |
| GPSGVXSAQLXR 3 0 0 1 602  | 1 | 658.8189 | 1311.623 | 2 | 40.37 | 0.00057 | GPSGVSQAQLAK  | Phospho (ST) | 0.0000001000000.0 | Synth_pep_35V.989.989.2.dta                |
| GPSGVXSAQLXR 3 3 5 0 671  | 1 | 486.9109 | 1457.711 | 3 | 36.56 | 0.00056 | GPSGVSQAQLLR  | Phospho (ST) | 0.0000001000000.0 | AIC_synth_45.1892.1892.3.dta               |
| GPSGVXSAQLXR 3 3 5 1 672  | 1 | 715.8585 | 1429.703 | 2 | 38.24 | 0.00055 | GPSGVSQAQLLK  | Phospho (ST) | 0.0000001000000.0 | Synth_pep_275V.1568.1568.2.dta             |
| GPSGVXSAQLXR 6 4 6 1 1294 | 1 | 627.7895 | 1253.564 | 2 | 40.09 | 0.00055 | GPSGVSQAQLSK  | Phospho (ST) | 0.0000001000000.0 | Synth_pep_35V.712.712.2.dta                |
| SXPFKXSLXFR 3 3 0 0 661   | 1 | 790.8867 | 1579.759 | 2 | 33.55 | 0.00055 | SDFPKLSPLAFGR | Phospho (ST) | 0.0000001000000.0 | Synth_pep_275V.1442.1442.2.dta             |
| GPSGVXSAQLXR 3 1 2 1 626  | 1 | 707.8174 | 1413.62  | 2 | 39.51 | 0.00055 | GPSGVSQAQLK   | Phospho (ST) | 0.0000001000000.0 | Synth_pep_375V.957.957.2.dta               |
| SXPFKXSLXFR 9 1 6 0 1833  | 1 | 790.8596 | 1579.705 | 2 | 40.15 | 0.00055 | SDFPKLSPLFGR  | Phospho (ST) | 0.0000001000000.0 | Synth_pep_275V.1073.1073.2.dta             |
| GPSGVXSAQLXR 2 9 4 1 590  | 1 | 686.811  | 1371.607 | 2 | 40.98 | 0.00055 | GPSGVSQAQLGK  | Phospho (ST) | 0.0000001000000.0 | Synth_pep_375V.835.835.2.dta               |
| SXPFKXSLXFR 2 2 9 1 460   | 1 | 804.8712 | 1607.728 | 2 | 32.64 | 0.00054 | SDFPKLSPLFGR  | Phospho (ST) | 0.0000001000000.0 | AIC_synth_test_25.1179.1179.2.dta          |
| GPSGVXSAQLXR 5 0 9 1 1020 | 1 | 685.8404 | 1369.666 | 2 | 39.84 | 0.00054 | GPSGLVSAQLYK  | Phospho (ST) | 0.0000001000000.0 | Synth_pep_275V.1123.1123.2.dta             |
| GPSGVXSAQLXR 5 0 9 1 1020 | 1 | 685.8414 | 1369.668 | 2 | 39.81 | 0.00054 | GPSGLVSAQLYK  | Phospho (ST) | 0.0000001000000.0 | AIC_synth_test_25.1354.1354.2.dta          |
| GPSGVXSAQLXR 2 1 1 1 424  | 1 | 691.7949 | 1381.575 | 2 | 44.02 | 0.00054 | GPSGVSQAQLDK  | Phospho (ST) | 0.0000001000000.0 | Synth_pep_325V.733.733.2.dta               |
| GPSGVXSAQLXR 2 1 2 1 426  | 1 | 698.8026 | 1395.591 | 2 | 44.61 | 0.00054 | GPSGVSQAQLK   | Phospho (ST) | 0.0000001000000.0 | Synth_pep_35V.741.741.2.dta                |
| GPSGVXSAQLXR 0 9 0 0 181  | 1 | 452.8822 | 1355.625 | 3 | 36.24 | 0.00053 | GPSGVSQAQLAR  | Phospho (ST) | 0.0000001000000.0 | AIC_synth_45.966.966.3.dta                 |
| SXPFKXSLXFR 0 5 2 0 105   | 1 | 764.88   | 1527.746 | 2 | 40.63 | 0.00053 | SDFPKLSPLFGR  | Phospho (ST) | 0.0000001000000.0 | Synth_pep_30V_120502214048.1172.1172.2.dta |
| SXPFKXSLXFR 4 6 1 1 924   | 1 | 482.8918 | 1445.654 | 3 | 43.58 | 0.00053 | SDFPKLSPLFGR  | Phospho (ST) | 0.0000001000000.0 | Synth_pep_425V.905.905.3.dta               |
| SXPFKXSLXFR 9 6 9 0 1939  | 1 | 814.8793 | 1627.744 | 2 | 37.45 | 0.00053 | SDFPKLSPLFGR  | Phospho (ST) | 0.0000001000000.0 | AIC_synth_test_25.1300.1300.2.dta          |
| SXPFKXSLXFR 0 4 9 1 100   | 1 | 493.5748 | 1477.703 | 3 | 41.26 | 0.00053 | SDFPKLSPLFGR  | Phospho (ST) | 0.0000001000000.0 | Synth_pep_375V.907.907.3.dta               |
| GPSGVXSAQLXR 2 1 9 1 440  | 1 | 715.8116 | 1429.609 | 2 | 38.23 | 0.00053 | GPSGVSQAQLYK  | Phospho (ST) | 0.0000001000000.0 | Synth_pep_30V_120502214048.804.804.2.dta   |
| SXPFKXSLXFR 0 5 3 0 107   | 1 | 773.8961 | 1545.778 | 2 | 32.76 | 0.00053 | SDFPKLSPLFGR  | Phospho (ST) | 0.0000001000000.0 | AIC_synth_test_25.1767.1767.2.dta          |
| GPSGVXSAQLXR 8 9 8 0 1797 | 1 | 706.8505 | 1411.687 | 2 | 34.57 | 0.00052 | GPSGVSQAQLVR  | Phospho (ST) | 0.0000001000000.0 | Synth_pep_325V.1177.1177.2.dta             |
| GPSGVXSAQLXR 4 5 8 1 918  | 1 | 646.8354 | 1291.566 | 2 | 40.03 | 0.00052 | GPSGVSQAQLVK  | Phospho (ST) | 0.0000001000000.0 | AIC_synth_test_25.1467.1467.2.dta          |
| SXPFKXSLXFR 5 0 0 0 1001  | 1 | 735.8795 | 1469.744 | 2 | 33.02 | 0.00052 | SDFPKLSPLAFGR | Phospho (ST) | 0.0000001000000.0 | AIC_synth_test_25.1401.1401.2.dta          |
| SXPFKXSLXFR 0 8 4 1 170   | 1 | 472.2429 | 1413.707 | 3 | 39.06 | 0.00052 | SDFPKLSPLFGR  | Phospho (ST) | 0.0000001000000.0 | AIC_synth_45.1191.1191.3.dta               |
| SXPFKXSLXFR 0 2 9 1 60    | 1 | 775.8685 | 1549.723 | 2 | 40.81 | 0.00052 | SDFPKLSPLFGR  | Phospho (ST) | 0.0000001000000.0 | Synth_pep_275V.978.978.2.dta               |
| SXPFKXSLXFR 8 6 8 1 1738  | 1 | 491.5907 | 1471.75  | 3 | 36.81 | 0.00052 | SDFPKLSPLFGR  | Phospho (ST) | 0.0000001000000.0 | AIC_synth_45.1295.1295.3.dta               |
| GPSGVXSAQLXR 1 4 5 0 291  | 1 | 446.2132 | 1335.618 | 3 | 38.63 | 0.00051 | GPSGVSQAQLLR  | Phospho (ST) | 0.0000001000000.0 | AIC_synth_45.994.994.3.dta                 |
| GPSGVXSAQLXR 1 7 8 0 357  | 1 | 683.8201 | 1365.626 | 2 | 39.16 | 0.00051 | GPSGVSQAQLVR  | Phospho (ST) | 0.0000001000000.0 | Synth_pep_30V_120502214048.842.842.2.dta   |
| GPSGVXSAQLXR 0 8 1 0 163  | 1 | 668.8179 | 1335.621 | 2 | 38.65 | 0.00051 | GPSGVSQAQLDR  | Phospho (ST) | 0.0000001000000.0 | AIC_synth_test_25.1015.1015.2.dta          |
| GPSGVXSAQLXR 5 0 1 1 1004 | 1 | 661.8217 | 1321.629 | 2 | 40.89 | 0.00051 | GPSGVSQAQLDK  | Phospho (ST) | 0.0000001000000.0 | Synth_pep_275V.981.981.2.dta               |
| GPSGVXSAQLXR 6 0 6 1 1214 | 1 | 634.7979 | 1267.581 | 2 | 41.47 | 0.00051 | GPSGVSQAQLSK  | Phospho (ST) | 0.0000001000000.0 | Synth_pep_325V.716.716.2.dta               |
| SXPFKXSLXFR 5 5 0 0 1101  | 1 | 756.903  | 1511.791 | 2 | 32.99 | 0.0005  | SDFPKLSPLAFGR | Phospho (ST) | 0.0000001000000.0 | AIC_synth_test_25.1719.1719.2.dta          |
| GPSGVXSAQLXR 0 4 9 1 100  | 1 | 657.808  | 1313.602 | 2 | 41.2  | 0.0005  | GPSGVSQAQLYK  | Phospho (ST) | 0.0000001000000.0 | Synth_pep_35V.800.800.2.dta                |
| GPSGVXSAQLXR 7 9 6 1 1594 | 1 | 687.8188 | 1373.623 | 2 | 45.3  | 0.0005  | GPSGVSQAQLSK  | Phospho (ST) | 0.0000001000000.0 | Synth_pep_375V.816.816.2.dta               |
| SXPFKXSLXFR 0 5 8 0 117   | 1 | 749.8964 | 1497.778 | 2 | 34.87 | 0.00049 | SDFPKLSPLFGR  | Phospho (ST) | 0.0000001000000.0 | AIC_synth_test_25.1608.1608.2.dta          |
| SXPFKXSLXFR 2 9 5 1 592   | 1 | 531.5977 | 1591.771 | 3 | 34.4  | 0.00049 | SDFPKLSPLFGR  | Phospho (ST) | 0.0000001000000.0 | Synth_pep_375V.1098.1098.3.dta             |
| SXPFKXSLXFR 2 9 2 0 585   | 1 | 818.8721 | 1635.73  | 2 | 37.15 | 0.00049 | SDFPKLSPLFGR  | Phospho (ST) | 0.0000001000000.0 | Synth_pep_30V_120502214048.1076.1076.2.dta |
| SXPFKXSLXFR 8 3 9 0 1679  | 1 | 542.269  | 1623.785 | 3 | 33.07 | 0.00049 | SDFPKLSPLFGR  | Phospho (ST) | 0.0000001000000.0 | AIC_synth_45.1556.1556.3.dta               |
| GPSGVXSAQLXR 6 6 1 1 1324 | 1 | 656.7923 | 1311.57  | 2 | 36.78 | 0.00049 | GPSGVSQAQLDK  | Phospho (ST) | 0.0000001000000.0 | Synth_pep_325V.711.711.2.dta               |
| GPSGVXSAQLXR 0 4 8 1 98   | 1 | 625.8094 | 1249.604 | 2 | 34.4  | 0.00049 | GPSGVSQAQLVK  | Phospho (ST) | 0.0000001000000.0 | Synth_pep_30V_120502214048.848.848.2.dta   |
| GPSGVXSAQLXR 8 7 2 0 1745 | 1 | 690.8263 | 1379.638 | 2 | 41.3  | 0.00049 | GPSGVSQAQLAR  | Phospho (ST) | 0.0000001000000.0 | Synth_pep_275V.865.865.2.dta               |
| GPSGVXSAQLXR 1 0 8 1 218  | 1 | 654.8153 | 1307.616 | 2 | 40.31 | 0.00049 | GPSGVSQAQLVK  | Phospho (ST) | 0.0000001000000.0 | Synth_pep_325V.855.855.2.dta               |
| SXPFKXSLXFR 6 5 1 0 1303  | 1 | 765.8696 | 1529.725 | 2 | 41.15 | 0.00048 | SDFPKLSPLDFGR | Phospho (ST) | 0.0000001000000.0 | Synth_pep_30V_120502214048.1204.1204.2.dta |
| SXPFKXSLXFR 2 9 2 0 585   | 1 | 546.2512 | 1635.372 | 3 | 37.24 | 0.00048 | SDFPKLSPLFGR  | Phospho (ST) | 0.0000001000000.0 | AIC_synth_45.1230.1230.3.dta               |
| SXPFKXSLXFR 5 0 5 0 1011  | 1 | 504.9379 | 1511.792 | 3 | 33.17 | 0.00048 | SDFPKLSPLFGR  | Phospho (ST) | 0.0000001000000.0 | AIC_synth_45.1445.1445.3.dta               |
| GPSGVXSAQLXR 8 8 8 1 1778 | 1 | 660.8514 | 1319.688 | 2 | 38.27 | 0.00048 | GPSGVSQAQLVK  | Phospho (ST) | 0.0000001000000.0 | Synth_pep_30V_120502214048.1137.1137.2.dta |
| SXPFKXSLXFR 8 2 9 1 1660  | 1 | 526.9422 | 1577.751 | 3 | 37.27 | 0.00048 | SDFPKLSPLFGR  | Phospho (ST) | 0.0000001000000.0 | Synth_pep_425V.963.963.3.dta               |
| GPSGVXSAQLXR 5 4 5 1 1092 | 1 | 653.8431 | 1305.672 | 2 | 39.64 | 0.00047 | GPSGLVSAQLLK  | Phospho (ST) | 0.0000001000000.0 | Synth_pep_325V.1218.1218.2.dta             |
| GPSGVXSAQLXR 6 5 1 1 1304 | 1 | 669.8195 | 1337.624 | 2 | 39.23 | 0.00047 | GPSGVSQAQLDK  | Phospho (ST) | 0.0000001000000.0 | Synth_pep_30V_120502214048.944.944.2.dta   |
| GPSGVXSAQLXR 6 5 3 1 1308 | 1 | 685.8389 | 1369.663 | 2 | 40.91 | 0.00047 | SDFPKLSPLFGR  | Phospho (ST) | 0.0000001000000.0 | Synth_pep_30V_120502214048.1322.1322.2.dta |
| GPSGVXSAQLXR 0 3 8 0 77   | 1 | 684.8374 | 1367.66  | 2 | 39.5  | 0.00047 | GPSGVSQAQLVR  | Phospho (ST) | 0.0000001000000.0 | Synth_pep_35V.1144                         |

|               |           |      |   |          |          |   |       |         |                |              |                   |                                            |
|---------------|-----------|------|---|----------|----------|---|-------|---------|----------------|--------------|-------------------|--------------------------------------------|
| GPSGXVSAQXLR  | [0 9 9 1] | 200  | 1 | 710.8292 | 1419.644 | 2 | 42.88 | 0.00043 | GPSGAVSYAQLYK  | Phospho (ST) | 0.0000001000000.0 | Synth_pep_375V.936.936.2.dta               |
| SXPFKXSPFXFGR | [6 1 0 1] | 1222 | 3 | 487.5646 | 1459.672 | 3 | 41.03 | 0.00043 | SXPFKDSPLAFGK  | Phospho (ST) | 0.0000001000000.0 | Synth_pep_425V.937.937.3.dta               |
| GPSGXVSAQXLR  | [0 5 2 1] | 106  | 1 | 668.8298 | 1335.645 | 2 | 41.29 | 0.00043 | GPSGAVSLAQLEK  | Phospho (ST) | 0.0000001000000.0 | Synth_pep_275V.1032.1032.2.dta             |
| GPSGXVSAQXLR  | [5 9 5 0] | 1191 | 1 | 720.8672 | 1439.72  | 2 | 37.01 | 0.00042 | GPSGVSVAQLLR   | Phospho (ST) | 0.0000001000000.0 | Synth_pep_325V.1379.1379.2.dta             |
| GPSGXVSAQXLR  | [0 3 5 1] | 172  | 1 | 452.2296 | 1353.667 | 3 | 42.73 | 0.00042 | GPSGAVSFAQLLK  | Phospho (ST) | 0.0000001000000.0 | Synth_pep_40V.1221.1221.3.dta              |
| SXPFKXSPFXFGR | [5 8 8 0] | 1177 | 3 | 763.9107 | 1525.807 | 2 | 33.74 | 0.00042 | SXPFKVSPLVFGK  | Phospho (ST) | 0.0000001000000.0 | Synth_pep_275V.1331.1331.2.dta             |
| SXPFKXSPFXFGR | [3 9 3 1] | 1788 | 3 | 548.9329 | 1643.777 | 3 | 40.04 | 0.00042 | SXPFKYSPLFFGK  | Phospho (ST) | 0.0000001000000.0 | Synth_pep_40V.1237.1237.3.dta              |
| GPSGXVSAQXLR  | [5 6 1 0] | 1123 | 1 | 683.8219 | 1365.629 | 2 | 40.31 | 0.00042 | GPSGDVSSAQLDR  | Phospho (ST) | 0.0000001000000.0 | AIC_synth_test_25.1063.1063.2.dta          |
| GPSGXVSAQXLR  | [1 4 1 1] | 284  | 1 | 655.7859 | 1309.557 | 2 | 42.2  | 0.00042 | GPSGDVSGAQLDK  | Phospho (ST) | 0.0000001000000.0 | Synth_pep_325V.735.735.2.dta               |
| GPSGXVSAQXLR  | [5 4 4 0] | 1089 | 1 | 639.8123 | 1277.61  | 2 | 44.89 | 0.00041 | GPSGLVSGAQLGR  | Phospho (ST) | 0.0000001000000.0 | Synth_pep_30V_120502214048.896.896.2.dta   |
| GPSGXVSAQXLR  | [6 2 6 1] | 1254 | 1 | 663.8001 | 1325.586 | 2 | 40.19 | 0.00041 | GPSGVSVAQLSK   | Phospho (ST) | 0.0000001000000.0 | Synth_pep_325V.717.717.2.dta               |
| SXPFKXSPFXFGR | [9 7 2 0] | 1945 | 1 | 536.92   | 1607.738 | 3 | 40.25 | 0.00041 | SXPFKVSPLFFGR  | Phospho (ST) | 0.0000001000000.0 | AIC_synth_45.1196.1196.3.dta               |
| GPSGXVSAQXLR  | [6 8 5 1] | 1372 | 1 | 661.8393 | 1321.664 | 2 | 40.83 | 0.00041 | GPSGVSVAQLLK   | Phospho (ST) | 0.0000001000000.0 | Synth_pep_325V.1119.1119.2.dta             |
| GPSGXVSAQXLR  | [2 3 5 1] | 1472 | 1 | 706.8434 | 1411.672 | 2 | 40.31 | 0.00041 | GPSGEVSFAQLLK  | Phospho (ST) | 0.0000001000000.0 | Synth_pep_35V.1236.1236.2.dta              |
| GPSGXVSAQXLR  | [3 9 6 1] | 1794 | 1 | 710.8286 | 1419.643 | 2 | 42.32 | 0.00041 | GPSGFVSYAQLSK  | Phospho (ST) | 0.0000001000000.0 | Synth_pep_35V.1030.1030.2.dta              |
| GPSGXVSAQXLR  | [0 6 3 1] | 128  | 1 | 664.816  | 1327.618 | 2 | 41.58 | 0.00041 | GPSGAVSSAQLFK  | Phospho (ST) | 0.0000001000000.0 | Synth_pep_325V.970.970.2.dta               |
| GPSGXVSAQXLR  | [3 8 3 1] | 1768 | 1 | 472.9017 | 1415.683 | 3 | 43.06 | 0.0004  | GPSGFVSYAQLFK  | Phospho (ST) | 0.0000001000000.0 | Synth_pep_40V.1343.1343.3.dta              |
| GPSGXVSAQXLR  | [0 5 0 1] | 102  | 1 | 639.8256 | 1277.637 | 2 | 38.29 | 0.0004  | GPSGAVSLAQLEK  | Phospho (ST) | 0.0000001000000.0 | Synth_pep_30V_120502214048.1075.1075.2.dta |
| GPSGXVSAQXLR  | [3 9 5 1] | 1792 | 1 | 482.9065 | 1445.698 | 3 | 40.96 | 0.0004  | GPSGFVSYAQLLK  | Phospho (ST) | 0.0000001000000.0 | Synth_pep_375V.1242.1242.3.dta             |
| SXPFKXSPFXFGR | [5 1 0 1] | 1022 | 1 | 496.2505 | 1485.73  | 3 | 42.38 | 0.0004  | SXPFKDSPLAFGK  | Phospho (ST) | 0.0000001000000.0 | AIC_synth_45.1204.1204.3.dta               |
| GPSGXVSAQXLR  | [9 0 7 1] | 1816 | 1 | 453.5504 | 1357.629 | 3 | 45.68 | 0.0004  | GPSGFVSSAQLTK  | Phospho (ST) | 0.0000001000000.0 | Synth_pep_425V.855.855.3.dta               |
| GPSGXVSAQXLR  | [3 3 4 1] | 1670 | 1 | 687.8262 | 1373.638 | 2 | 42.53 | 0.0004  | GPSGFVSYAQLGK  | Phospho (ST) | 0.0000001000000.0 | Synth_pep_275V.1314.1314.2.dta             |
| GPSGXVSAQXLR  | [8 8 1 1] | 1764 | 1 | 668.8298 | 1335.645 | 2 | 41.69 | 0.0004  | GPSGAVSLAQLEK  | Phospho (ST) | 0.0000001000000.0 | AIC_synth_test_25.1161.1161.2.dta          |
| SXPFKXSPFXFGR | [4 0 3 1] | 1808 | 1 | 731.861  | 1461.707 | 2 | 36.23 | 0.00039 | SXPFKVSPLFFGK  | Phospho (ST) | 0.0000001000000.0 | AIC_synth_test_25.1400.1400.2.dta          |
| SXPFKXSPFXFGR | [6 0 9 1] | 1220 | 1 | 503.5775 | 1507.711 | 3 | 43.58 | 0.00039 | SXPFKVSPLVFGK  | Phospho (ST) | 0.0000001000000.0 | Synth_pep_375V.977.977.3.dta               |
| GPSGXVSAQXLR  | [5 2 8 0] | 1057 | 1 | 696.847  | 1391.679 | 2 | 40.48 | 0.00039 | GPSGLVSEAQLVR  | Phospho (ST) | 0.0000001000000.0 | Synth_pep_30V_120502214048.1073.1073.2.dta |
| GPSGXVSAQXLR  | [3 4 0 1] | 1682 | 1 | 649.8101 | 1297.606 | 2 | 42.25 | 0.00039 | GPSGFVSGAQLAK  | Phospho (ST) | 0.0000001000000.0 | Synth_pep_30V_120502214048.915.915.2.dta   |
| SXPFKXSPFXFGR | [1 2 0 1] | 245  | 1 | 794.8545 | 1587.692 | 2 | 38.11 | 0.00039 | SXPFKVSPLFFGR  | Phospho (ST) | 0.0000001000000.0 | Synth_pep_30V_120502214048.1010.1010.2.dta |
| GPSGXVSAQXLR  | [1 2 9 1] | 1260 | 1 | 715.8136 | 1429.613 | 2 | 39.57 | 0.00039 | GPSGDVSSAQLYK  | Phospho (ST) | 0.0000001000000.0 | Synth_pep_35V.824.824.2.dta                |
| GPSGXVSAQXLR  | [5 3 5 1] | 1072 | 1 | 698.8674 | 1395.72  | 2 | 37.86 | 0.00038 | GPSGLVSGAQLLK  | Phospho (ST) | 0.0000001000000.0 | AIC_synth_test_25.2002.2002.2.dta          |
| SXPFKXSPFXFGR | [4 5 3 1] | 1908 | 1 | 502.2592 | 1503.756 | 3 | 36.76 | 0.00038 | SXPFKVSPLFFGK  | Phospho (ST) | 0.0000001000000.0 | Synth_pep_425V.1267.1267.3.dta             |
| SXPFKXSPFXFGR | [5 6 5 1] | 1132 | 1 | 500.9339 | 1499.78  | 3 | 38.48 | 0.00038 | SXPFKVSPLFFGK  | Phospho (ST) | 0.0000001000000.0 | Synth_pep_40V.1066.1066.3.dta              |
| SXPFKXSPFXFGR | [6 3 5 1] | 1272 | 1 | 512.262  | 1533.764 | 3 | 40.44 | 0.00038 | SXPFKVSPLFFGK  | Phospho (ST) | 0.0000001000000.0 | AIC_synth_45.1580.1580.3.dta               |
| GPSGXVSAQXLR  | [6 4 2 1] | 1286 | 1 | 648.7952 | 1295.576 | 2 | 40.57 | 0.00038 | GPSGFVSGAQLGK  | Phospho (ST) | 0.0000001000000.0 | Synth_pep_325V.715.715.2.dta               |
| SXPFKXSPFXFGR | [7 9 9 1] | 1600 | 1 | 807.8821 | 1613.75  | 2 | 34.32 | 0.00037 | SXPFKVSPLVFGK  | Phospho (ST) | 0.0000001000000.0 | Synth_pep_425V.1029.1029.2.dta             |
| SXPFKXSPFXFGR | [2 9 8 1] | 1598 | 1 | 526.925  | 1577.753 | 3 | 39.07 | 0.00037 | SXPFKVSPLVFGK  | Phospho (ST) | 0.0000001000000.0 | Synth_pep_425V.1035.1035.3.dta             |
| GPSGXVSAQXLR  | [9 5 5 1] | 1912 | 1 | 706.8636 | 1411.713 | 2 | 40.35 | 0.00037 | GPSGVLSAQLLK   | Phospho (ST) | 0.0000001000000.0 | Synth_pep_275V.1472.1472.2.dta             |
| SXPFKXSPFXFGR | [0 8 9 1] | 180  | 1 | 507.5891 | 1519.746 | 3 | 41.76 | 0.00037 | SXPFKVSPLVFGK  | Phospho (ST) | 0.0000001000000.0 | Synth_pep_35V.1075.1075.3.dta              |
| GPSGXVSAQXLR  | [4 4 4 1] | 1890 | 1 | 597.7794 | 1193.544 | 2 | 40.53 | 0.00037 | GPSGFVSGAQLGK  | Phospho (ST) | 0.0000001000000.0 | Synth_pep_35V.723.723.2.dta                |
| GPSGXVSAQXLR  | [3 4 5 1] | 1692 | 1 | 670.8343 | 1339.654 | 2 | 43.82 | 0.00037 | GPSGFVSGAQLLK  | Phospho (ST) | 0.0000001000000.0 | Synth_pep_325V.1164.1164.2.dta             |
| GPSGXVSAQXLR  | [0 2 6 1] | 154  | 1 | 655.8035 | 1309.592 | 2 | 40.8  | 0.00037 | GPSGAVSEAQLSK  | Phospho (ST) | 0.0000001000000.0 | Synth_pep_375V.737.737.2.dta               |
| SXPFKXSPFXFGR | [0 4 1 1] | 184  | 1 | 477.562  | 1429.664 | 3 | 42.3  | 0.00037 | SXPFKVSPLDFGK  | Phospho (ST) | 0.0000001000000.0 | Synth_pep_40V.964.964.3.dta                |
| SXPFKXSPFXFGR | [4 9 4 1] | 1990 | 1 | 488.9028 | 1463.687 | 3 | 43.45 | 0.00037 | SXPFKVSPLDFGK  | Phospho (ST) | 0.0000001000000.0 | AIC_synth_45.1192.1192.3.dta               |
| SXPFKXSPFXFGR | [1 0 1 0] | 203  | 1 | 758.8441 | 1515.674 | 2 | 43.06 | 0.00036 | SXPFKVSPLDFGR  | Phospho (ST) | 0.0000001000000.0 | Synth_pep_30V_120502214048.1067.1067.2.dta |
| GPSGXVSAQXLR  | [4 5 4 1] | 1910 | 1 | 625.8107 | 1249.607 | 2 | 35.74 | 0.00036 | GPSGFVSLAQLEK  | Phospho (ST) | 0.0000001000000.0 | AIC_synth_test_25.1154.1154.2.dta          |
| GPSGXVSAQXLR  | [6 6 6 1] | 1334 | 1 | 642.7949 | 1283.575 | 2 | 46.15 | 0.00036 | GPSGVSVAQLSK   | Phospho (ST) | 0.0000001000000.0 | Synth_pep_275V.722.722.2.dta               |
| SXPFKXSPFXFGR | [0 2 9 1] | 160  | 1 | 517.5808 | 1549.721 | 3 | 42.2  | 0.00036 | SXPFKVSPLVFGK  | Phospho (ST) | 0.0000001000000.0 | AIC_synth_45.1061.1061.3.dta               |
| GPSGXVSAQXLR  | [9 0 9 1] | 1820 | 1 | 710.8279 | 1419.641 | 2 | 42.88 | 0.00036 | GPSGVVSAQLYK   | Phospho (ST) | 0.0000001000000.0 | Synth_pep_30V_120502214048.969.969.2.dta   |
| SXPFKXSPFXFGR | [5 1 2 0] | 1025 | 1 | 786.8767 | 1571.739 | 2 | 42.58 | 0.00036 | SXPFKVSPLFFGR  | Phospho (ST) | 0.0000001000000.0 | Synth_pep_275V.1121.1121.2.dta             |
| GPSGXVSAQXLR  | [4 0 6 0] | 813  | 1 | 633.7933 | 1265.572 | 2 | 43.93 | 0.00036 | GPSGFVSSAQLSR  | Phospho (ST) | 0.0000001000000.0 | Synth_pep_275V.745.745.2.dta               |
| SXPFKXSPFXFGR | [3 8 3 0] | 767  | 1 | 536.9368 | 1607.789 | 3 | 35.77 | 0.00036 | SXPFKVSPLFFGR  | Phospho (ST) | 0.0000001000000.0 | AIC_synth_45.1748.1748.3.dta               |
| GPSGXVSAQXLR  | [1 1 8 0] | 1237 | 1 | 460.8764 | 1379.608 | 3 | 41.08 | 0.00036 | GPSGDVSDAQLVR  | Phospho (ST) | 0.0000001000000.0 | Synth_pep_425V.809.809.3.dta               |
| SXPFKXSPFXFGR | [6 8 0 1] | 1362 | 1 | 482.2448 | 1443.713 | 3 | 42.56 | 0.00035 | SXPFKVSPLAFGK  | Phospho (ST) | 0.0000001000000.0 | Synth_pep_40V.1080.1080.3.dta              |
| GPSGXVSAQXLR  | [1 6 1 1] | 324  | 1 | 670.79   | 1339.565 | 2 | 37.44 | 0.00035 | GPSGDVSSAQLDK  | Phospho (ST) | 0.0000001000000.0 | Synth_pep_325V.719.719.2.dta               |
| GPSGXVSAQXLR  | [5 0 0 1] | 1002 | 1 | 639.8264 | 1277.638 | 2 | 38.91 | 0.00035 | GPSGLVSSAQLAK  | Phospho (ST) | 0.0000001000000.0 | Synth_pep_30V_120502214048.987.987.2.dta   |
| SXPFKXSPFXFGR | [6 0 1 0] | 1203 | 1 | 744.8475 | 1487.681 | 2 | 42.23 | 0.00035 | SXPFKVSPLDFGR  | Phospho (ST) | 0.0000001000000.0 | Synth_pep_325V.1002.1002.2.dta             |
| GPSGXVSAQXLR  | [6 1 0 0] | 1221 | 1 | 442.1996 | 1323.577 | 3 | 43.19 | 0.00035 | GPSGVSQAQLAR   | Phospho (ST) | 0.0000001000000.0 | AIC_synth_45.752.752.3.dta                 |
| GPSGXVSAQXLR  | [9 3 9 1] | 1880 | 1 | 748.8444 | 1495.674 | 2 | 44    | 0.00035 | GPSGVVSAQLYK   | Phospho (ST) | 0.0000001000000.0 | Synth_pep_35V.1208.1208.2.dta              |
| GPSGXVSAQXLR  | [8 9 9 1] | 1800 | 1 | 724.8456 | 1447.677 | 2 | 44.88 | 0.00035 | GPSGVVSAQLYK   | Phospho (ST) | 0.0000001000000.0 | Synth_pep_30V_120502214048.1072.1072.2.dta |
| GPSGXVSAQXLR  | [9 4 6 1] | 1894 | 1 | 665.8062 | 1329.598 | 2 | 42.9  | 0.00035 | GPSGVVSAQLSK   | Phospho (ST) | 0.0000001000000.0 | Synth_pep_30V_120502214048.770.770.2.dta   |
| GPSGXVSAQXLR  | [4 5 6 1] | 1914 | 1 | 640.8162 | 1279.618 | 2 | 40.11 | 0.00035 | GPSGFVSLAQLEK  | Phospho (ST) | 0.0000001000000.0 | Synth_pep_275V.914.914.2.dta               |
| GPSGXVSAQXLR  | [6 8 6 1] | 1374 | 1 | 648.8135 | 1295.613 | 2 | 40.44 | 0.00035 | GPSGVVSAQLSK   | Phospho (ST) | 0.0000001000000.0 | Synth_pep_325V.816.816.2.dta               |
| GPSGXVSAQXLR  | [3 3 0 1] | 1662 | 1 | 694.8349 | 1387.655 | 2 | 42.88 | 0.00035 | GPSGFVSAQLAK   | Phospho (ST) | 0.0000001000000.0 | Synth_pep_275V.1346.1346.2.dta             |
| GPSGXVSAQXLR  | [2 2 5 1] | 1452 | 1 | 697.8337 | 1393.653 | 2 | 38.04 | 0.00035 | GPSGVESEAQLLK  | Phospho (ST) | 0.0000001000000.0 | Synth_pep_35V.934.934.2.dta                |
| GPSGXVSAQXLR  | [3 5 3 0] | 707  | 1 | 486.9089 | 1457.705 | 3 | 38.89 | 0.00034 | GPSGFVSLAQLEK  | Phospho (ST) | 0.0000001000000.0 | Synth_pep_425V.1466.1466.3.dta             |
| GPSGXVSAQXLR  | [0 9 9 1] | 1200 | 1 | 710.8288 | 1419.643 | 2 | 43.15 | 0.00034 | GPSGAVSYAQLYK  | Phospho (ST) | 0.0000001000000.0 | Synth_pep_325V.960.960.2.dta               |
| GPSGXVSAQXLR  | [9 7 8 0] | 1957 | 1 | 707.8375 | 1413.66  | 2 | 42.52 | 0.00034 | GPSGVVSTAQQLVR | Phospho (ST) | 0.0000001000000.0 | Synth_pep_325V.936.936.2.dta               |
| SXPFKXSPFXFGR | [6 8 2 1] | 1366 | 1 | 501.5816 | 1501.723 | 3 | 41.09 | 0.00034 | SXPFKVSPLFFGR  | Phospho (ST) | 0.0000001000000.0 | Synth_pep_375V.1024.1024.3.dta             |
| SXPFKXSPFXFGR | [6 9 2 0] | 1385 | 1 | 797.867  | 1593.72  | 2 | 42.79 | 0.00034 | SXPFKVSPLFFGR  | Phospho (ST) | 0.0000001000000.0 | Synth_pep_30V_120502214048.1066.1066.2.dta |
| GPSGXVSAQXLR  | [0 7 8 1] | 158  | 1 | 647.8246 | 1293.635 | 2 | 41.49 | 0.00034 | GPSGAVSTAQQLVR | Phospho (ST) | 0.0000001000000.0 | Synth_pep_275V.853.853.2.dta               |
| GPSGXVSAQXLR  | [9 0 1 1] | 1804 | 1 | 686.8136 | 1371.613 | 2 | 44.25 | 0.00034 | GPSGVVSAQLDK   | Phospho (ST) | 0.0000001000000.0 | Synth_pep_275V.888.888.2.dta               |
| GPSGXVSAQXLR  | [1 4 0 1] | 282  | 1 | 633.79   | 1265.565 | 2 | 41.26 | 0.00034 | GPSGDVSGAQLAK  | Phospho (ST) | 0.0000001000000.0 | Synth_pep_35V.728.728.2.dta                |
| GPSGXVSAQXLR  | [6 8 5 0] | 1371 | 1 | 675.8401 | 1349.666 | 2 | 42.34 | 0.00034 | GPSGVVSAQLLR   | Phospho (ST) | 0.0000001000000.0 | Synth_pep_35V.1154.1154.2.dta              |

|               |         |      |   |          |          |   |       |         |               |              |                   |                                            |
|---------------|---------|------|---|----------|----------|---|-------|---------|---------------|--------------|-------------------|--------------------------------------------|
| SXPFKXSPFXFRG | 5 9 5 1 | 1192 | 1 | 526.2783 | 1575.813 | 3 | 35.17 | 0.0003  | SLPFKXSPFLFGK | Phospho (ST) | 0.0000001000000.0 | AIC_synth_45.1516.1516.3.dta               |
| SXPFKXSPFXFRG | 6 8 0 1 | 1362 | 1 | 482.2453 | 1443.714 | 3 | 43.4  | 0.0003  | SPFKXSPFLAFGK | Phospho (ST) | 0.0000001000000.0 | Synth_pep_425V.1082.1082.3.dta             |
| GPSGVXSAQQLXR | 3 8 3 1 | 768  | 2 | 708.8504 | 1415.686 | 2 | 44.91 | 0.0003  | GPSGVXSAQQLF  | Phospho (ST) | 0.0000001000000.0 | Synth_pep_275V.1529.1529.2.dta             |
| GPSGVXSAQQLXR | 0 2 1 0 | 43   | 3 | 456.2043 | 1365.591 | 3 | 42.95 | 0.0003  | GPSGVXSAQQLDR | Phospho (ST) | 0.0000001000000.0 | Synth_pep_425V.770.770.3.dta               |
| GPSGVXSAQQLXR | 0 6 9 1 | 140  | 2 | 672.8148 | 1343.615 | 2 | 46.45 | 0.0003  | GPSGVXSAQQLYK | Phospho (ST) | 0.0000001000000.0 | Synth_pep_325V.796.796.2.dta               |
| GPSGVXSAQQLXR | 0 2 9 1 | 60   | 2 | 693.8195 | 1385.625 | 2 | 43.21 | 0.0003  | GPSGVXSAQQLYK | Phospho (ST) | 0.0000001000000.0 | Synth_pep_35V.840.840.2.dta                |
| GPSGVXSAQQLXR | 3 3 7 1 | 676  | 2 | 709.8405 | 1417.666 | 2 | 42.09 | 0.0003  | GPSGVXSAQQLTK | Phospho (ST) | 0.0000001000000.0 | Synth_pep_275V.1348.1348.2.dta             |
| SXPFKXSPFXFRG | 5 3 5 0 | 1071 | 2 | 794.9186 | 1587.823 | 2 | 35.18 | 0.0003  | SLPFKXSPFLFGR | Phospho (ST) | 0.0000001000000.0 | Synth_pep_275V.1489.1489.2.dta             |
| GPSGVXSAQQLXR | 5 5 5 0 | 1111 | 2 | 695.8756 | 1389.737 | 2 | 36.7  | 0.00029 | GPSGLVSLAQLLR | Phospho (ST) | 0.0000001000000.0 | Synth_pep_30V_120502214048.1570.1570.2.dta |
| GPSGVXSAQQLXR | 5 3 5 0 | 1071 | 1 | 712.869  | 1423.724 | 2 | 35.44 | 0.00029 | GPSGLVSLAQLLR | Phospho (ST) | 0.0000001000000.0 | Synth_pep_30V_120502214048.1403.1403.2.dta |
| SXPFKXSPFXFRG | 2 8 1 0 | 563  | 1 | 520.2487 | 1557.724 | 3 | 44.33 | 0.00029 | SPFKXSPFLDFGR | Phospho (ST) | 0.0000001000000.0 | AIC_synth_45.1310.1310.3.dta               |
| GPSGVXSAQQLXR | 9 8 3 1 | 1968 | 2 | 716.8484 | 1431.682 | 2 | 42.64 | 0.00029 | GPSGVXSAQQLFK | Phospho (ST) | 0.0000001000000.0 | Synth_pep_325V.1288.1288.2.dta             |
| GPSGVXSAQQLXR | 3 5 8 1 | 1718 | 3 | 461.5745 | 1381.702 | 3 | 42.68 | 0.00029 | GPSGVXSAQQLVK | Phospho (ST) | 0.0000001000000.0 | AIC_synth_45.1679.1679.3.dta               |
| SXPFKXSPFXFRG | 4 9 8 1 | 1998 | 1 | 502.9193 | 1505.736 | 3 | 42.07 | 0.00029 | SPFKXSPFLVFGK | Phospho (ST) | 0.0000001000000.0 | AIC_synth_45.1268.1268.3.dta               |
| GPSGVXSAQQLXR | 4 3 3 1 | 868  | 2 | 687.8267 | 1373.639 | 2 | 44.85 | 0.00029 | GPSGVXSAQQLFK | Phospho (ST) | 0.0000001000000.0 | Synth_pep_425V.1311.1311.2.dta             |
| GPSGVXSAQQLXR | 1 9 3 1 | 388  | 1 | 724.8273 | 1447.64  | 2 | 43.18 | 0.00029 | GPSGVXSAQQLFK | Phospho (ST) | 0.0000001000000.0 | Synth_pep_35V.1186.1186.2.dta              |
| GPSGVXSAQQLXR | 2 1 9 1 | 440  | 1 | 715.813  | 1429.612 | 2 | 41.88 | 0.00029 | GPSGVXSAQQLYK | Phospho (ST) | 0.0000001000000.0 | Synth_pep_325V.810.810.2.dta               |
| GPSGVXSAQQLXR | 0 8 3 0 | 167  | 2 | 684.8373 | 1367.666 | 2 | 41.65 | 0.00029 | GPSGVXSAQQLFR | Phospho (ST) | 0.0000001000000.0 | Synth_pep_35V.1216.1216.2.dta              |
| GPSGVXSAQQLXR | 4 3 4 1 | 870  | 2 | 642.8019 | 1283.589 | 2 | 41.38 | 0.00029 | GPSGVXSAQQLGK | Phospho (ST) | 0.0000001000000.0 | Synth_pep_30V_120502214048.993.993.2.dta   |
| GPSGVXSAQQLXR | 9 0 0 1 | 1802 | 3 | 443.5461 | 1327.616 | 3 | 43.01 | 0.00029 | GPSGVXSAQQLAK | Phospho (ST) | 0.0000001000000.0 | Synth_pep_425V.853.853.3.dta               |
| GPSGVXSAQQLXR | 2 7 0 0 | 541  | 3 | 451.5437 | 1351.609 | 3 | 39.2  | 0.00029 | GPSGVXSAQQLAR | Phospho (ST) | 0.0000001000000.0 | Synth_pep_425V.815.815.3.dta               |
| GPSGVXSAQQLXR | 0 5 5 0 | 111  | 2 | 674.853  | 1347.91  | 2 | 35.54 | 0.00028 | GPSGAVSLAQLLR | Phospho (ST) | 0.0000001000000.0 | AIC_synth_test_25.1760.1760.2.dta          |
| GPSGVXSAQQLXR | 0 8 8 0 | 177  | 3 | 440.8942 | 1319.661 | 3 | 37.68 | 0.00028 | GPSGVXSAQQLVR | Phospho (ST) | 0.0000001000000.0 | AIC_synth_45.1127.1127.3.dta               |
| GPSGVXSAQQLXR | 5 3 8 1 | 1078 | 2 | 691.8577 | 1381.701 | 2 | 42.8  | 0.00028 | GPSGLVSLAQLVK | Phospho (ST) | 0.0000001000000.0 | Synth_pep_30V_120502214048.1360.1360.2.dta |
| GPSGVXSAQQLXR | 8 5 8 1 | 1718 | 3 | 445.5746 | 1333.702 | 3 | 41.59 | 0.00028 | GPSGVXSAQQLVK | Phospho (ST) | 0.0000001000000.0 | AIC_synth_45.1545.1545.3.dta               |
| GPSGVXSAQQLXR | 0 1 1 0 | 23   | 2 | 676.7927 | 1351.571 | 2 | 41.75 | 0.00028 | GPSGAVSDAQLDR | Phospho (ST) | 0.0000001000000.0 | Synth_pep_30V_120502214048.752.752.2.dta   |
| GPSGVXSAQQLXR | 9 4 4 1 | 1890 | 2 | 650.8007 | 1299.587 | 2 | 44.17 | 0.00028 | GPSGVXSAQQLGK | Phospho (ST) | 0.0000001000000.0 | Synth_pep_275V.808.808.2.dta               |
| GPSGVXSAQQLXR | 6 6 6 1 | 1324 | 2 | 656.7936 | 1311.573 | 2 | 39.26 | 0.00028 | GPSGVXSAQQLDK | Phospho (ST) | 0.0000001000000.0 | Synth_pep_30V_120502214048.712.712.2.dta   |
| GPSGVXSAQQLXR | 7 9 5 0 | 1591 | 3 | 476.9025 | 1427.686 | 3 | 40.36 | 0.00028 | GPSGVXSAQQLLR | Phospho (ST) | 0.0000001000000.0 | Synth_pep_425V.1403.1403.3.dta             |
| GPSGVXSAQQLXR | 3 4 3 1 | 688  | 2 | 687.8251 | 1373.636 | 2 | 44.1  | 0.00028 | GPSGVXSAQQLFK | Phospho (ST) | 0.0000001000000.0 | Synth_pep_30V_120502214048.1201.1201.2.dta |
| GPSGVXSAQQLXR | 0 9 3 1 | 188  | 2 | 702.8311 | 1403.648 | 2 | 43.76 | 0.00028 | GPSGAVSQAQLFK | Phospho (ST) | 0.0000001000000.0 | Synth_pep_30V_120502214048.1194.1194.2.dta |
| SXPFKXSPFXFRG | 2 8 2 1 | 566  | 1 | 515.5851 | 1543.733 | 3 | 40.64 | 0.00028 | SPFKXSPFLFEGK | Phospho (ST) | 0.0000001000000.0 | AIC_synth_45.1244.1244.3.dta               |
| SXPFKXSPFXFRG | 5 9 1 1 | 1184 | 1 | 526.9251 | 1577.754 | 3 | 40.31 | 0.00028 | SPFKXSPFLDFGK | Phospho (ST) | 0.0000001000000.0 | AIC_synth_425V.1125.1125.3.dta             |
| GPSGVXSAQQLXR | 9 3 0 1 | 1862 | 2 | 702.8321 | 1403.65  | 2 | 45.22 | 0.00028 | GPSGVXSAQQLAK | Phospho (ST) | 0.0000001000000.0 | Synth_pep_275V.1202.1202.2.dta             |
| GPSGVXSAQQLXR | 5 2 3 0 | 1047 | 2 | 720.8475 | 1439.681 | 2 | 40.29 | 0.00028 | GPSGLVSLAQLFR | Phospho (ST) | 0.0000001000000.0 | Synth_pep_325V.1235.1235.2.dta             |
| GPSGVXSAQQLXR | 3 7 4 1 | 750  | 2 | 664.8152 | 1327.616 | 2 | 43.17 | 0.00028 | GPSGVXSAQQLGK | Phospho (ST) | 0.0000001000000.0 | Synth_pep_30V_120502214048.940.940.2.dta   |
| SXPFKXSPFXFRG | 8 2 3 1 | 1648 | 3 | 521.5915 | 1561.753 | 3 | 40.92 | 0.00028 | SPFKXSPFLFEGK | Phospho (ST) | 0.0000001000000.0 | Synth_pep_425V.1162.1162.3.dta             |
| GPSGVXSAQQLXR | 0 5 5 1 | 112  | 3 | 440.9029 | 1319.687 | 3 | 40.85 | 0.00027 | GPSGAVSLAQLLK | Phospho (ST) | 0.0000001000000.0 | AIC_synth_45.1463.1463.3.dta               |
| SXPFKXSPFXFRG | 0 2 9 0 | 59   | 1 | 789.8712 | 1577.728 | 2 | 43.82 | 0.00027 | SPFKXSPFLVFGK | Phospho (ST) | 0.0000001000000.0 | Synth_pep_275V.1012.1012.2.dta             |
| GPSGVXSAQQLXR | 4 0 4 0 | 809  | 2 | 618.7921 | 1235.57  | 2 | 41.46 | 0.00027 | GPSGVXSAQQLGR | Phospho (ST) | 0.0000001000000.0 | AIC_synth_test_25.824.824.2.dta            |
| GPSGVXSAQQLXR | 9 4 4 1 | 1890 | 2 | 650.8    | 1299.585 | 2 | 44.28 | 0.00027 | GPSGVXSAQQLGK | Phospho (ST) | 0.0000001000000.0 | Synth_pep_35V.793.793.2.dta                |
| GPSGVXSAQQLXR | 1 0 0 0 | 201  | 3 | 436.869  | 1307.585 | 3 | 43.15 | 0.00027 | GPSGDVSAQQLAR | Phospho (ST) | 0.0000001000000.0 | Synth_pep_40V.781.781.3.dta                |
| GPSGVXSAQQLXR | 9 9 9 1 | 2000 | 2 | 756.8407 | 1511.667 | 2 | 43.28 | 0.00027 | GPSGVXSAQQLYK | Phospho (ST) | 0.0000001000000.0 | Synth_pep_30V_120502214048.1059.1059.2.dta |
| GPSGVXSAQQLXR | 3 2 9 1 | 660  | 2 | 731.8336 | 1461.653 | 2 | 41.22 | 0.00027 | GPSGVXSAQQLYK | Phospho (ST) | 0.0000001000000.0 | Synth_pep_30V_120502214048.1070.1070.2.dta |
| SXPFKXSPFXFRG | 0 5 4 0 | 109  | 1 | 728.872  | 1455.73  | 2 | 41.09 | 0.00027 | SPFKXSPFLFGR  | Phospho (ST) | 0.0000001000000.0 | AIC_synth_test_25.1503.1503.2.dta          |
| GPSGVXSAQQLXR | 9 6 0 1 | 1922 | 2 | 672.8141 | 1343.614 | 2 | 46.89 | 0.00027 | GPSGVXSAQQLAK | Phospho (ST) | 0.0000001000000.0 | Synth_pep_275V.818.818.2.dta               |
| GPSGVXSAQQLXR | 3 5 9 1 | 1720 | 3 | 482.9053 | 1445.694 | 3 | 42.66 | 0.00026 | GPSGVXSAQQLYK | Phospho (ST) | 0.0000001000000.0 | Synth_pep_40V.1235.1235.3.dta              |
| GPSGVXSAQQLXR | 2 5 1 0 | 503  | 2 | 704.8293 | 1407.644 | 2 | 47.28 | 0.00026 | GPSGAVSLAQLDR | Phospho (ST) | 0.0000001000000.0 | AIC_synth_test_25.1203.1203.2.dta          |
| GPSGVXSAQQLXR | 2 7 8 0 | 557  | 2 | 690.8299 | 1379.645 | 2 | 42.6  | 0.00026 | GPSGAVSLAQLVR | Phospho (ST) | 0.0000001000000.0 | Synth_pep_325V.874.874.2.dta               |
| GPSGVXSAQQLXR | 6 8 1 1 | 1364 | 2 | 662.8119 | 1323.609 | 2 | 40.69 | 0.00026 | GPSGVXSAQQLDK | Phospho (ST) | 0.0000001000000.0 | Synth_pep_325V.831.831.2.dta               |
| GPSGVXSAQQLXR | 0 9 9 1 | 200  | 2 | 710.8286 | 1419.643 | 2 | 44.36 | 0.00026 | GPSGAVSQAQLYK | Phospho (ST) | 0.0000001000000.0 | Synth_pep_35V.952.952.2.dta                |
| GPSGVXSAQQLXR | 3 3 9 1 | 680  | 2 | 740.8474 | 1479.68  | 2 | 45.79 | 0.00026 | GPSGVXSAQQLYK | Phospho (ST) | 0.0000001000000.0 | Synth_pep_325V.1259.1259.2.dta             |
| GPSGVXSAQQLXR | 0 0 3 1 | 18   | 2 | 656.8191 | 1311.624 | 2 | 41.67 | 0.00026 | GPSGAVSQAQLFK | Phospho (ST) | 0.0000001000000.0 | Synth_pep_325V.1063.1063.2.dta             |
| SXPFKXSPFXFRG | 1 3 2 0 | 265  | 1 | 803.8664 | 1605.718 | 2 | 39.98 | 0.00026 | SPFKXSPFLFGR  | Phospho (ST) | 0.0000001000000.0 | Synth_pep_30V_120502214048.1276.1276.2.dta |
| GPSGVXSAQQLXR | 1 9 3 1 | 388  | 1 | 724.8263 | 1447.638 | 2 | 41.61 | 0.00026 | GPSGVXSAQQLFK | Phospho (ST) | 0.0000001000000.0 | Synth_pep_375V.1109.1109.2.dta             |
| GPSGVXSAQQLXR | 4 8 4 1 | 1970 | 2 | 618.8025 | 1235.59  | 2 | 35.77 | 0.00026 | GPSGVXSAQQLGK | Phospho (ST) | 0.0000001000000.0 | Synth_pep_30V_120502214048.843.843.2.dta   |
| GPSGVXSAQQLXR | 9 4 5 0 | 1891 | 2 | 692.835  | 1383.656 | 2 | 40.11 | 0.00026 | GPSGVXSAQQLLR | Phospho (ST) | 0.0000001000000.0 | Synth_pep_30V_120502214048.1017.1017.2.dta |
| GPSGVXSAQQLXR | 9 2 3 1 | 1848 | 2 | 731.8342 | 1461.654 | 2 | 41.41 | 0.00026 | GPSGVXSAQQLFK | Phospho (ST) | 0.0000001000000.0 | Synth_pep_325V.1097.1097.2.dta             |
| SXPFKXSPFXFRG | 0 6 9 1 | 140  | 3 | 503.578  | 1507.712 | 3 | 45.34 | 0.00025 | SPFKXSPFLVFGK | Phospho (ST) | 0.0000001000000.0 | AIC_synth_45.1037.1037.3.dta               |
| GPSGVXSAQQLXR | 2 8 2 0 | 565  | 2 | 704.8258 | 1407.637 | 2 | 44.47 | 0.00025 | GPSGVXSAQQLER | Phospho (ST) | 0.0000001000000.0 | Synth_pep_30V_120502214048.929.929.2.dta   |
| GPSGVXSAQQLXR | 2 9 5 0 | 591  | 1 | 728.846  | 1455.678 | 2 | 41.04 | 0.00025 | GPSGAVSQAQLLR | Phospho (ST) | 0.0000001000000.0 | Synth_pep_35V.1100.1100.2.dta              |
| GPSGVXSAQQLXR | 0 4 6 1 | 94   | 2 | 619.792  | 1237.569 | 2 | 43.38 | 0.00025 | GPSGAVSQAQLSK | Phospho (ST) | 0.0000001000000.0 | Synth_pep_375V.717.717.2.dta               |
| GPSGVXSAQQLXR | 3 4 3 0 | 687  | 2 | 701.8297 | 1401.645 | 2 | 38.56 | 0.00025 | GPSGVXSAQQLFR | Phospho (ST) | 0.0000001000000.0 | AIC_synth_test_25.1580.1580.2.dta          |
| GPSGVXSAQQLXR | 4 4 6 1 | 894  | 2 | 612.7842 | 1223.554 | 2 | 39.96 | 0.00025 | GPSGVXSAQQLSK | Phospho (ST) | 0.0000001000000.0 | Synth_pep_375V.713.713.2.dta               |
| GPSGVXSAQQLXR | 9 3 3 1 | 1868 | 2 | 740.8479 | 1479.681 | 2 | 46.1  | 0.00025 | GPSGVXSAQQLFK | Phospho (ST) | 0.0000001000000.0 | Synth_pep_275V.1520.1520.2.dta             |
| GPSGVXSAQQLXR | 3 0 3 0 | 607  | 2 | 708.8351 | 1415.656 | 2 | 43.96 | 0.00025 | GPSGVXSAQQLFR | Phospho (ST) | 0.0000001000000.0 | Synth_pep_325V.1181.1181.2.dta             |
| SXPFKXSPFXFRG | 7 6 9 1 | 1540 | 3 | 513.5805 | 1537.72  | 3 | 42.07 | 0.00025 | SPFKXSPFLFGR  | Phospho (ST) | 0.0000001000000.0 | AIC_synth_45.1044.1044.3.dta               |
| GPSGVXSAQQLXR | 2 5 3 1 | 508  | 2 | 706.8436 | 1411.673 | 2 | 42.41 | 0.00025 | GPSGAVSQAQLFK | Phospho (ST) | 0.0000001000000.0 | Synth_pep_325V.1320.1320.2.dta             |
| GPSGVXSAQQLXR | 9 4 6 1 | 1894 | 2 | 665.8062 | 1329.598 | 2 | 44.43 | 0.00025 | GPSGVXSAQQLSK | Phospho (ST) | 0.0000001000000.0 | Synth_pep_275V.793.793.2.dta               |
| GPSGVXSAQQLXR | 5 9 3 0 | 1187 | 2 | 737.856  | 1473.697 | 2 | 45.7  | 0.00025 | GPSGLVSLAQLFR | Phospho (ST) | 0.0000001000000.0 | Synth_pep_325V.1384.1384.2.dta             |
| GPSGVXSAQQLXR | 4 1 8 0 | 837  | 2 | 661.8087 | 1321.603 | 2 | 40.46 | 0.00025 | GPSGVXSAQQLVR | Phospho (ST) | 0.0000001000000.0 | Synth_pep_325V.811.811.2.dta               |
| SXPFKXSPFXFRG | 1 9 3 1 | 388  | 1 | 508.237  | 1521.689 | 3 | 44.97 | 0.00025 | SPFKXSPFLDFGR | Phospho (ST) | 0.0000001000000.0 | AIC_synth_45.1261.1261.3.dta               |
| GPSGVXSAQQLXR | 0 5 8 1 | 118  | 2 | 653.8416 | 1305.669 | 2 | 42.58 | 0.00024 | GPSGAVSQAQLVK | Phospho (ST) | 0.00000010000     |                                            |

|                            |   |          |          |   |       |         |               |              |                   |                                            |
|----------------------------|---|----------|----------|---|-------|---------|---------------|--------------|-------------------|--------------------------------------------|
| GPSGVXSAQQLXR 0 3 1 1 64   | 1 | 678.8115 | 1355.608 | 2 | 45.11 | 0.00022 | GPSGAVSAQQLDK | Phospho (ST) | 0.0000001000000.0 | Synth_pep_30V_120502214048.1016.1016.2.dta |
| SXPFKXSLXFG 5 8 3 0 1167   | 1 | 525.6093 | 1573.806 | 3 | 36.51 | 0.00022 | SLPFKXSLPFFGR | Phospho (ST) | 0.0000001000000.0 | AIC_synth_45.1668.1668.3.dta               |
| GPSGVXSAQQLXR 9 6 6 1 1934 | 1 | 680.8124 | 1359.61  | 2 | 47.45 | 0.00022 | GPSGVSSAQLSK  | Phospho (ST) | 0.0000001000000.0 | AIC_synth_test_25.855.855.2.dta            |
| SXPFKXSLXFG 5 3 5 1 1072   | 1 | 520.9467 | 1559.818 | 3 | 36.8  | 0.00021 | SLPFKXSLPFFGK | Phospho (ST) | 0.0000001000000.0 | Synth_pep_425V.1306.1306.3.dta             |
| GPSGVXSAQQLXR 0 4 4 1 90   | 1 | 604.7876 | 1207.561 | 2 | 36.86 | 0.00021 | GPSGAVSQAQLGK | Phospho (ST) | 0.0000001000000.0 | Synth_pep_275V.739.739.2.dta               |
| GPSGVXSAQQLXR 5 0 4 1 1010 | 1 | 632.8187 | 1263.623 | 2 | 40.94 | 0.00021 | GPSGVSSAQLGK  | Phospho (ST) | 0.0000001000000.0 | Synth_pep_325V.955.955.2.dta               |
| GPSGVXSAQQLXR 1 9 7 0 395  | 1 | 715.8185 | 1429.622 | 2 | 45.25 | 0.00021 | GPSGVDVSAQLTR | Phospho (ST) | 0.0000001000000.0 | Synth_pep_325V.890.890.2.dta               |
| SXPFKXSLXFG 0 8 9 1 180    | 1 | 507.5913 | 1519.752 | 3 | 43.1  | 0.00021 | SAPFKXSLPFFGK | Phospho (ST) | 0.0000001000000.0 | AIC_synth_45.1284.1284.3.dta               |
| GPSGVXSAQQLXR 8 4 0 0 1681 | 1 | 639.8135 | 1277.613 | 2 | 47.19 | 0.00021 | GPSGVSSAQLAR  | Phospho (ST) | 0.0000001000000.0 | Synth_pep_35V.808.808.2.dta                |
| SXPFKXSLXFG 9 2 9 0 1859   | 1 | 557.5914 | 1669.752 | 3 | 37.07 | 0.00021 | SYPFKXSLPFFGR | Phospho (ST) | 0.0000001000000.0 | AIC_synth_45.1214.1214.3.dta               |
| SXPFKXSLXFG 3 6 9 1 740    | 1 | 528.9212 | 1583.742 | 3 | 42.91 | 0.00021 | SFPFKXSLPFFGK | Phospho (ST) | 0.0000001000000.0 | Synth_pep_425V.1085.1085.3.dta             |
| GPSGVXSAQQLXR 0 2 9 0 59   | 1 | 707.8216 | 1413.629 | 2 | 44.93 | 0.00021 | GPSGAVSEAQLYR | Phospho (ST) | 0.0000001000000.0 | Synth_pep_325V.863.863.2.dta               |
| SXPFKXSLXFG 3 0 3 1 608    | 1 | 518.2585 | 1551.754 | 3 | 36.98 | 0.00021 | SFPFKASLPFFGK | Phospho (ST) | 0.0000001000000.0 | Synth_pep_375V.1202.1202.3.dta             |
| GPSGVXSAQQLXR 2 4 6 1 494  | 1 | 648.7947 | 1295.575 | 2 | 43.12 | 0.00021 | GPSGVEVSAQLSK | Phospho (ST) | 0.0000001000000.0 | Synth_pep_375V.715.715.2.dta               |
| GPSGVXSAQQLXR 3 5 3 1 708  | 1 | 715.8572 | 1429.7   | 2 | 44.32 | 0.00021 | GPSGFVSLAQLFK | Phospho (ST) | 0.0000001000000.0 | Synth_pep_30V_120502214048.1536.1536.2.dta |
| SXPFKXSLXFG 4 9 2 1 986    | 1 | 512.9089 | 1535.705 | 3 | 45.82 | 0.00021 | SGPFKXSLPFFGK | Phospho (ST) | 0.0000001000000.0 | Synth_pep_40V.991.991.3.dta                |
| SXPFKXSLXFG 4 7 0 0 941    | 1 | 482.2374 | 1443.69  | 3 | 42.71 | 0.00021 | SGPFKXSLPFFGR | Phospho (ST) | 0.0000001000000.0 | Synth_pep_35V.947.947.3.dta                |
| SXPFKXSLXFG 0 4 2 1 86     | 1 | 482.2343 | 1443.681 | 3 | 44.48 | 0.00021 | SGPFKXSLPFFGK | Phospho (ST) | 0.0000001000000.0 | Synth_pep_375V.877.877.3.dta               |
| GPSGVXSAQQLXR 4 7 8 1 958  | 1 | 640.8162 | 1279.618 | 2 | 42.25 | 0.00021 | GPSGVDVTAQLVK | Phospho (ST) | 0.0000001000000.0 | Synth_pep_275V.841.841.2.dta               |
| GPSGVXSAQQLXR 4 0 3 1 808  | 1 | 649.8106 | 1297.607 | 2 | 45.04 | 0.00021 | GPSGVDVSAQLFK | Phospho (ST) | 0.0000001000000.0 | Synth_pep_275V.1100.1100.2.dta             |
| GPSGVXSAQQLXR 1 0 3 1 208  | 1 | 678.8135 | 1355.613 | 2 | 46.74 | 0.00021 | GPSGVDVSAQLFK | Phospho (ST) | 0.0000001000000.0 | Synth_pep_35V.1042.1042.2.dta              |
| GPSGVXSAQQLXR 3 5 2 1 706  | 1 | 471.5653 | 1411.674 | 3 | 43.01 | 0.00021 | GPSGFVSLAQLFK | Phospho (ST) | 0.0000001000000.0 | Synth_pep_40V.1156.1156.3.dta              |
| GPSGVXSAQQLXR 5 0 8 0 1017 | 1 | 445.566  | 1333.676 | 3 | 39.96 | 0.0002  | GPSGVSSAQLVLR | Phospho (ST) | 0.0000001000000.0 | AIC_synth_45.1287.1287.3.dta               |
| GPSGVXSAQQLXR 8 5 3 0 1707 | 1 | 705.8621 | 1409.71  | 2 | 37.83 | 0.0002  | GPSGVVSLAQLFK | Phospho (ST) | 0.0000001000000.0 | AIC_synth_test_25.1991.1991.2.dta          |
| GPSGVXSAQQLXR 4 3 3 1 868  | 1 | 687.8275 | 1373.64  | 2 | 45.48 | 0.0002  | GPSGVDVSAQLFK | Phospho (ST) | 0.0000001000000.0 | AIC_synth_test_25.1808.1808.2.dta          |
| SXPFKXSLXFG 7 6 2 0 1525   | 1 | 766.8594 | 1531.704 | 2 | 42.41 | 0.0002  | STPFKXSLPFFGR | Phospho (ST) | 0.0000001000000.0 | Synth_pep_30V_120502214048.913.913.2.dta   |
| SXPFKXSLXFG 6 5 2 0 1305   | 1 | 772.8794 | 1543.744 | 2 | 44.58 | 0.0002  | SFPFKXSLPFFGR | Phospho (ST) | 0.0000001000000.0 | Synth_pep_30V_120502214048.1177.1177.2.dta |
| GPSGVXSAQQLXR 4 4 4 1 890  | 1 | 597.7795 | 1193.544 | 2 | 43.14 | 0.0002  | GPSGVDVSAQLGK | Phospho (ST) | 0.0000001000000.0 | Synth_pep_325V.720.720.2.dta               |
| SXPFKXSLXFG 2 1 2 0 425    | 1 | 530.2394 | 1587.996 | 3 | 41.16 | 0.0002  | SFPFKXSLPFFGR | Phospho (ST) | 0.0000001000000.0 | AIC_synth_45.1070.1070.3.dta               |
| GPSGVXSAQQLXR 9 6 1 1 1924 | 1 | 694.8108 | 1387.607 | 2 | 45.03 | 0.0002  | GPSGVSSAQLDK  | Phospho (ST) | 0.0000001000000.0 | AIC_synth_test_25.880.880.2.dta            |
| GPSGVXSAQQLXR 1 7 5 0 351  | 1 | 690.8276 | 1379.641 | 2 | 44.15 | 0.0002  | GPSGVDVTAQLLR | Phospho (ST) | 0.0000001000000.0 | Synth_pep_325V.953.953.2.dta               |
| GPSGVXSAQQLXR 4 7 7 0 955  | 1 | 437.5401 | 1309.599 | 3 | 38.28 | 0.0002  | GPSGVDVTAQLTR | Phospho (ST) | 0.0000001000000.0 | Synth_pep_425V.748.748.3.dta               |
| GPSGVXSAQQLXR 5 0 5 0 1011 | 1 | 450.2375 | 1347.691 | 3 | 37.3  | 0.00019 | GPSGLVSSAQLLR | Phospho (ST) | 0.0000001000000.0 | AIC_synth_45.1498.1498.3.dta               |
| SXPFKXSLXFG 0 5 8 0 117    | 1 | 500.2656 | 1497.775 | 3 | 38.49 | 0.00019 | SAPFKXSLPFFGR | Phospho (ST) | 0.0000001000000.0 | AIC_synth_45.1468.1468.3.dta               |
| SXPFKXSLXFG 4 2 0 0 841    | 1 | 491.5691 | 1471.685 | 3 | 44.44 | 0.00019 | SFPFKXSLPFFGR | Phospho (ST) | 0.0000001000000.0 | Synth_pep_40V.907.907.3.dta                |
| SXPFKXSLXFG 7 9 8 1 1598   | 1 | 517.5934 | 1549.759 | 3 | 43.54 | 0.00019 | STPFKXSLPFFGK | Phospho (ST) | 0.0000001000000.0 | Synth_pep_40V.1026.1026.3.dta              |
| GPSGVXSAQQLXR 8 7 1 1 1744 | 1 | 669.8201 | 1337.626 | 2 | 43.15 | 0.00019 | GPSGVVTAQLDK  | Phospho (ST) | 0.0000001000000.0 | Synth_pep_325V.815.815.2.dta               |
| GPSGVXSAQQLXR 0 5 9 1 120  | 1 | 457.5617 | 1369.663 | 3 | 44.91 | 0.00019 | GPSGAVSLAQLYK | Phospho (ST) | 0.0000001000000.0 | Synth_pep_425V.1055.1055.3.dta             |
| GPSGVXSAQQLXR 5 4 3 0 1087 | 1 | 684.8363 | 1367.558 | 2 | 44.22 | 0.00019 | GPSGLVSSAQLFR | Phospho (ST) | 0.0000001000000.0 | Synth_pep_30V_120502214048.1192.1192.2.dta |
| GPSGVXSAQQLXR 5 4 3 0 1087 | 1 | 684.837  | 1367.66  | 2 | 43.45 | 0.00019 | GPSGLVSSAQLFR | Phospho (ST) | 0.0000001000000.0 | Synth_pep_275V.1249.1249.2.dta             |
| GPSGVXSAQQLXR 0 5 8 1 118  | 1 | 653.8419 | 1305.669 | 2 | 43.72 | 0.00018 | GPSGAVSLAQLVK | Phospho (ST) | 0.0000001000000.0 | Synth_pep_275V.1218.1218.2.dta             |
| GPSGVXSAQQLXR 5 3 8 1 1078 | 1 | 691.8576 | 1381.701 | 2 | 44.76 | 0.00018 | GPSGLVSSAQLVK | Phospho (ST) | 0.0000001000000.0 | Synth_pep_30V_120502214048.1432.1432.2.dta |
| SXPFKXSLXFG 6 5 2 1 1306   | 1 | 506.2539 | 1515.74  | 3 | 43.41 | 0.00018 | SFPFKXSLPFFGK | Phospho (ST) | 0.0000001000000.0 | Synth_pep_425V.1098.1098.3.dta             |
| GPSGVXSAQQLXR 5 4 0 0 1081 | 1 | 431.5482 | 1291.623 | 3 | 44.76 | 0.00018 | GPSGLVSSAQLAR | Phospho (ST) | 0.0000001000000.0 | AIC_synth_45.1094.1094.3.dta               |
| GPSGVXSAQQLXR 6 1 6 1 1234 | 1 | 656.7921 | 1311.57  | 2 | 41.28 | 0.00018 | GPSGVDVSAQLSK | Phospho (ST) | 0.0000001000000.0 | Synth_pep_425V.712.712.2.dta               |
| GPSGVXSAQQLXR 1 0 4 0 209  | 1 | 432.1972 | 1293.57  | 3 | 48.3  | 0.00018 | GPSGVDVSAQLGR | Phospho (ST) | 0.0000001000000.0 | Synth_pep_425V.761.761.3.dta               |
| GPSGVXSAQQLXR 6 8 1 1 1364 | 1 | 662.813  | 1323.612 | 2 | 42.27 | 0.00018 | GPSGVDVSAQLDK | Phospho (ST) | 0.0000001000000.0 | AIC_synth_test_25.944.944.2.dta            |
| SXPFKXSLXFG 1 5 2 0 305    | 1 | 786.8748 | 1571.735 | 2 | 44.74 | 0.00018 | SFPFKXSLPFFGR | Phospho (ST) | 0.0000001000000.0 | Synth_pep_30V_120502214048.1238.1238.2.dta |
| GPSGVXSAQQLXR 9 3 9 1 1880 | 1 | 748.8436 | 1495.673 | 2 | 46.88 | 0.00018 | GPSGVVSAQLYK  | Phospho (ST) | 0.0000001000000.0 | Synth_pep_30V_120502214048.1274.1274.2.dta |
| GPSGVXSAQQLXR 5 2 0 0 1041 | 1 | 682.8328 | 1363.651 | 2 | 44.3  | 0.00018 | GPSGVDVSAQLAR | Phospho (ST) | 0.0000001000000.0 | Synth_pep_35V.946.946.2.dta                |
| GPSGVXSAQQLXR 0 3 3 1 68   | 1 | 694.8349 | 1387.655 | 2 | 45.72 | 0.00018 | GPSGAVSFAQLFK | Phospho (ST) | 0.0000001000000.0 | Synth_pep_325V.1323.1323.2.dta             |
| SXPFKXSLXFG 2 5 9 0 519    | 1 | 540.9319 | 1619.774 | 3 | 42.73 | 0.00018 | SFPFKXSLPFFGR | Phospho (ST) | 0.0000001000000.0 | Synth_pep_40V.1143.1143.3.dta              |
| GPSGVXSAQQLXR 3 0 4 0 609  | 1 | 663.8121 | 1325.61  | 2 | 43.41 | 0.00018 | GPSGVSSAQLGR  | Phospho (ST) | 0.0000001000000.0 | Synth_pep_275V.1033.1033.2.dta             |
| GPSGVXSAQQLXR 0 8 9 1 180  | 1 | 678.8321 | 1355.65  | 2 | 45.16 | 0.00018 | GPSGAVVSAQLYK | Phospho (ST) | 0.0000001000000.0 | Synth_pep_35V.968.968.2.dta                |
| GPSGVXSAQQLXR 9 6 3 1 1928 | 1 | 710.8279 | 1419.641 | 2 | 45.84 | 0.00018 | GPSGVSSAQLFK  | Phospho (ST) | 0.0000001000000.0 | Synth_pep_30V_120502214048.1068.1068.2.dta |
| GPSGVXSAQQLXR 1 8 5 1 372  | 1 | 675.8376 | 1349.661 | 2 | 45.35 | 0.00018 | GPSGVDVSAQLLK | Phospho (ST) | 0.0000001000000.0 | Synth_pep_30V_120502214048.1197.1197.2.dta |
| GPSGVXSAQQLXR 2 0 2 1 406  | 1 | 676.8082 | 1351.602 | 2 | 44.1  | 0.00018 | GPSGVDVSAQLFK | Phospho (ST) | 0.0000001000000.0 | Synth_pep_35V.835.835.2.dta                |
| GPSGVXSAQQLXR 2 7 8 1 558  | 1 | 676.8289 | 1351.643 | 2 | 45.61 | 0.00018 | GPSGVEVTAQLVK | Phospho (ST) | 0.0000001000000.0 | Synth_pep_275V.854.854.2.dta               |
| GPSGVXSAQQLXR 6 4 8 1 1298 | 1 | 633.8074 | 1265.6   | 2 | 38.79 | 0.00018 | GPSGVSSAQLVK  | Phospho (ST) | 0.0000001000000.0 | Synth_pep_30V_120502214048.816.816.2.dta   |
| GPSGVXSAQQLXR 5 7 1 0 1143 | 1 | 690.8281 | 1379.642 | 2 | 44.67 | 0.00018 | GPSGVDVTAQLDR | Phospho (ST) | 0.0000001000000.0 | AIC_synth_test_25.1112.1112.2.dta          |
| GPSGVXSAQQLXR 0 9 6 1 194  | 1 | 672.8137 | 1343.613 | 2 | 48.65 | 0.00018 | GPSGVDVSAQLSK | Phospho (ST) | 0.0000001000000.0 | Synth_pep_375V.824.824.2.dta               |
| SXPFKXSLXFG 1 5 1 0 303    | 1 | 520.2483 | 1557.723 | 3 | 45.28 | 0.00017 | SFPFKXSLPFFGR | Phospho (ST) | 0.0000001000000.0 | Synth_pep_425V.1186.1186.3.dta             |
| GPSGVXSAQQLXR 3 5 8 1 718  | 1 | 691.8606 | 1381.707 | 2 | 42.03 | 0.00017 | GPSGFVSLAQLVK | Phospho (ST) | 0.0000001000000.0 | AIC_synth_test_25.1847.1847.2.dta          |
| GPSGVXSAQQLXR 3 3 3 1 668  | 1 | 732.8492 | 1463.684 | 2 | 46.83 | 0.00017 | GPSGVDVSAQLFK | Phospho (ST) | 0.0000001000000.0 | Synth_pep_30V_120502214048.1528.1528.2.dta |
| GPSGVXSAQQLXR 2 5 5 0 511  | 1 | 703.8558 | 1405.697 | 2 | 46.32 | 0.00017 | GPSGVEVSAQLLR | Phospho (ST) | 0.0000001000000.0 | Synth_pep_325V.1271.1271.2.dta             |
| SXPFKXSLXFG 6 0 3 1 1208   | 1 | 498.245  | 1491.713 | 3 | 45.78 | 0.00017 | SFPFKASLPFFGK | Phospho (ST) | 0.0000001000000.0 | Synth_pep_40V.1034.1034.3.dta              |
| GPSGVXSAQQLXR 0 2 2 0 45   | 1 | 690.8132 | 1379.612 | 2 | 48.18 | 0.00017 | GPSGAVSEAQLER | Phospho (ST) | 0.0000001000000.0 | AIC_synth_test_25.847.847.2.dta            |
| GPSGVXSAQQLXR 6 8 2 1 1366 | 1 | 446.8809 | 1337.621 | 3 | 43.6  | 0.00017 | GPSGVDVSAQLFK | Phospho (ST) | 0.0000001000000.0 | Synth_pep_425V.839.839.3.dta               |
| GPSGVXSAQQLXR 3 4 7 0 695  | 1 | 678.8186 | 1355.623 | 2 | 44.59 | 0.00017 | GPSGVVSAQLTR  | Phospho (ST) | 0.0000001000000.0 | Synth_pep_275V.962.962.2.dta               |
| GPSGVXSAQQLXR 0 2 1 0 43   | 1 | 683.804  | 1365.594 | 2 | 45.47 | 0.00017 | GPSGAVSEAQLDR | Phospho (ST) | 0.0000001000000.0 | Synth_pep_275V.784.784.2.dta               |
| SXPFKXSLXFG 6 6 6 0 1333   | 1 | 738.8456 | 1475.677 | 2 | 43.28 | 0.00017 | SFPFKXSLPFFGR | Phospho (ST) | 0.0000001000000.0 | Synth_pep_30V_120502214048.921.921.2.dta   |
| SXPFKXSLXFG 5 5 5 1 1112   | 1 | 509.6181 | 1525.832 | 3 | 37.91 | 0.00016 | SLPFKXSLPFFGK | Phospho (ST) | 0.0000001000000.0 | AIC_synth_45.1735.1735.3.dta               |
| GPSGVXSAQQLXR 0 5 8 1 118  | 1 | 653.8432 | 1305.672 | 2 | 44.23 | 0.00016 | GPSGAVSLAQLVK | Phospho (ST) | 0.0000001000000.0 | Synth_pep_35V.1128.1128.2.dta              |
| SXPFKXSLXFG 7 9 9 1 1600   | 1 | 538.9246 | 1613.752 | 3 | 38.06 | 0.00016 | STPFKXSLPFFGK | Phospho (ST) | 0.0000001000000.0 | Synth_pep_35V.1049.1049.3.dta              |
| SXPFKXSLXFG 5 3 5 1 1072   | 1 | 520.9461 | 1559.817 | 3 | 38    | 0.00016 | SLPFKXSLPFFGK | Phospho (ST) | 0.0000001000000.0 | AIC_synth_45.1732.1732.3.dta               |
| GPSGVXSAQQLXR 4 4 0 1 882  | 1 | 604.787  | 1207.559 | 2 | 41.88 | 0.00016 | GPSGVDVSAQLAK | Phospho (ST) | 0.0000001000000.0 | Synth_pep_35V.729.729.2.dta                |
| SXPFKXSLXFG 9 2 9 0 599    | 1 | 835.8843 | 1669.754 | 2 | 38.08 | 0.00016 | SFPFKXSLPFFGR | Phospho (ST) | 0.0000001000000.0 | Synth_pep_275V                             |

|                           |   |          |          |   |       |         |               |              |                   |                                            |
|---------------------------|---|----------|----------|---|-------|---------|---------------|--------------|-------------------|--------------------------------------------|
| GPSGXVSAQXLR 2 5 3 1 508  | 1 | 706.8449 | 1411.675 | 2 | 44.4  | 0.00015 | GPSGEVSLAQLFK | Phospho (ST) | 0.0000001000000.0 | Synth_pep_35V.1297.1297.2.dta              |
| GPSGXVSAQXLR 6 9 3 1 1388 | 1 | 710.8294 | 1419.644 | 2 | 47.53 | 0.00015 | GPSGVVSAQFLK  | Phospho (ST) | 0.0000001000000.0 | Synth_pep_325V.1128.1128.2.dta             |
| SXPFKXSPXFGR 6 5 9 0 1319 | 1 | 526.93   | 1577.768 | 3 | 42.46 | 0.00015 | SXPFKXSPYFGR  | Phospho (ST) | 0.0000001000000.0 | AIC_synth_45.1460.1460.3.dta               |
| GPSGXVSAQXLR 9 3 1 1 1864 | 1 | 724.8289 | 1447.643 | 2 | 46.88 | 0.00015 | GPSGVVSAQFLDK | Phospho (ST) | 0.0000001000000.0 | AIC_synth_test_25.1426.1426.2.dta          |
| GPSGXVSAQXLR 1 4 3 1 288  | 1 | 671.8047 | 1341.595 | 2 | 46.76 | 0.00015 | GPSGDVSAQFLK  | Phospho (ST) | 0.0000001000000.0 | Synth_pep_35V.964.964.2.dta                |
| GPSGXVSAQXLR 1 5 2 0 305  | 1 | 704.8262 | 1407.638 | 2 | 46.36 | 0.00015 | GPSGDVSAQFLER | Phospho (ST) | 0.0000001000000.0 | Synth_pep_30V_120502214048.1020.1020.2.dta |
| GPSGXVSAQXLR 3 2 3 1 648  | 1 | 723.8369 | 1445.659 | 2 | 45.31 | 0.00015 | GPSGVVSEAQLFK | Phospho (ST) | 0.0000001000000.0 | Synth_pep_325V.1215.1215.2.dta             |
| GPSGXVSAQXLR 0 9 4 1 190  | 1 | 657.8085 | 1313.602 | 2 | 46.37 | 0.00015 | GPSGVVSAQFLGK | Phospho (ST) | 0.0000001000000.0 | Synth_pep_375V.841.841.2.dta               |
| GPSGXVSAQXLR 9 9 5 0 1991 | 1 | 745.8552 | 1489.696 | 2 | 44.33 | 0.00015 | GPSGVVSAQFLR  | Phospho (ST) | 0.0000001000000.0 | Synth_pep_30V_120502214048.1224.1224.2.dta |
| GPSGXVSAQXLR 0 5 8 1 118  | 1 | 653.8425 | 1305.671 | 2 | 44.8  | 0.00014 | GPSGVVSAQFLVK | Phospho (ST) | 0.0000001000000.0 | Synth_pep_325V.1143.1143.2.dta             |
| GPSGXVSAQXLR 5 8 5 1 1172 | 1 | 674.8678 | 1347.721 | 2 | 43.22 | 0.00014 | GPSGVVSAQFLK  | Phospho (ST) | 0.0000001000000.0 | AIC_synth_test_25.1871.1871.2.dta          |
| GPSGXVSAQXLR 0 8 0 1 162  | 1 | 632.8195 | 1263.625 | 2 | 40.31 | 0.00014 | GPSGVVSAQFLAK | Phospho (ST) | 0.0000001000000.0 | Synth_pep_275V.898.898.2.dta               |
| SXPFKXSPXFGR 5 6 0 1 1122 | 1 | 486.9182 | 1457.733 | 3 | 45.92 | 0.00014 | SXPFKXSPYFGR  | Phospho (ST) | 0.0000001000000.0 | AIC_synth_45.1172.1172.3.dta               |
| SXPFKXSPXFGR 4 5 2 1 906  | 1 | 496.2503 | 1485.729 | 3 | 46.78 | 0.00014 | SXPFKXSPYFGR  | Phospho (ST) | 0.0000001000000.0 | AIC_synth_45.1357.1357.3.dta               |
| GPSGXVSAQXLR 5 1 0 0 1021 | 1 | 675.8218 | 1349.629 | 2 | 46.78 | 0.00014 | GPSGVVSAQFLR  | Phospho (ST) | 0.0000001000000.0 | Synth_pep_30V_120502214048.936.936.2.dta   |
| GPSGXVSAQXLR 3 3 3 1 668  | 1 | 732.8491 | 1463.684 | 2 | 47.85 | 0.00014 | GPSGVVSAQFLK  | Phospho (ST) | 0.0000001000000.0 | Synth_pep_325V.1487.1487.2.dta             |
| GPSGXVSAQXLR 5 0 4 1 1010 | 1 | 632.8199 | 1263.625 | 2 | 40.2  | 0.00014 | GPSGVVSAQFLGK | Phospho (ST) | 0.0000001000000.0 | AIC_synth_test_25.1138.1138.2.dta          |
| SXPFKXSPXFGR 4 6 4 1 930  | 1 | 463.5582 | 1387.653 | 3 | 47.23 | 0.00014 | SXPFKXSPYFGR  | Phospho (ST) | 0.0000001000000.0 | AIC_synth_45.965.965.3.dta                 |
| GPSGXVSAQXLR 0 3 5 1 72   | 1 | 677.8424 | 1353.67  | 2 | 46.75 | 0.00014 | GPSGVVSAQFLK  | Phospho (ST) | 0.0000001000000.0 | Synth_pep_275V.1385.1385.2.dta             |
| GPSGXVSAQXLR 0 4 6 1 94   | 1 | 619.7924 | 1237.57  | 2 | 45.82 | 0.00014 | GPSGVVSAQFLSK | Phospho (ST) | 0.0000001000000.0 | Synth_pep_35V.720.720.2.dta                |
| GPSGXVSAQXLR 0 9 8 0 197  | 1 | 692.8345 | 1383.655 | 2 | 42.86 | 0.00014 | GPSGVVSAQFLVR | Phospho (ST) | 0.0000001000000.0 | Synth_pep_35V.984.984.2.dta                |
| GPSGXVSAQXLR 8 0 0 1 1602 | 1 | 632.8185 | 1263.623 | 2 | 42.48 | 0.00014 | GPSGVVSAQFLAK | Phospho (ST) | 0.0000001000000.0 | Synth_pep_35V.866.866.2.dta                |
| GPSGXVSAQXLR 8 8 5 1 1772 | 1 | 667.8589 | 1333.703 | 2 | 44.68 | 0.00014 | GPSGVVSAQFLK  | Phospho (ST) | 0.0000001000000.0 | Synth_pep_325V.1255.1255.2.dta             |
| GPSGXVSAQXLR 2 8 6 0 573  | 1 | 683.8215 | 1365.628 | 2 | 45.05 | 0.00014 | GPSGVVSAQFLSR | Phospho (ST) | 0.0000001000000.0 | Synth_pep_325V.858.858.2.dta               |
| SXPFKXSPXFGR 5 2 9 1 1060 | 1 | 531.5966 | 1591.768 | 3 | 39.2  | 0.00014 | SXPFKXSPYFGR  | Phospho (ST) | 0.0000001000000.0 | Synth_pep_40V.1029.1029.3.dta              |
| GPSGXVSAQXLR 3 0 0 1 602  | 1 | 656.8192 | 1311.624 | 2 | 44.32 | 0.00014 | GPSGVVSAQFLAK | Phospho (ST) | 0.0000001000000.0 | Synth_pep_325V.993.993.2.dta               |
| SXPFKXSPXFGR 4 1 2 0 825  | 1 | 506.2306 | 1515.67  | 3 | 46.65 | 0.00014 | SXPFKXSPYFGR  | Phospho (ST) | 0.0000001000000.0 | Synth_pep_40V.921.921.3.dta                |
| SXPFKXSPXFGR 5 7 1 1 1144 | 1 | 676.8295 | 1351.644 | 2 | 46.83 | 0.00014 | SXPFKXSPYFGR  | Phospho (ST) | 0.0000001000000.0 | AIC_synth_test_25.1080.1080.2.dta          |
| GPSGXVSAQXLR 2 9 3 1 588  | 1 | 731.8348 | 1461.655 | 2 | 45.79 | 0.00014 | GPSGVVSAQFLK  | Phospho (ST) | 0.0000001000000.0 | Synth_pep_375V.1121.1121.2.dta             |
| GPSGXVSAQXLR 3 3 4 0 669  | 1 | 701.83   | 1401.645 | 2 | 41.17 | 0.00014 | GPSGVVSAQFLGR | Phospho (ST) | 0.0000001000000.0 | Synth_pep_325V.1241.1241.2.dta             |
| GPSGXVSAQXLR 2 5 5 1 512  | 1 | 689.8531 | 1377.692 | 2 | 45.2  | 0.00014 | GPSGEVSLAQLLK | Phospho (ST) | 0.0000001000000.0 | Synth_pep_35V.1240.1240.2.dta              |
| SXPFKXSPXFGR 2 2 5 0 451  | 1 | 793.8846 | 1585.755 | 2 | 43.45 | 0.00014 | SXPFKXSPYFGR  | Phospho (ST) | 0.0000001000000.0 | Synth_pep_275V.1090.1090.2.dta             |
| SXPFKXSPXFGR 5 5 1 0 1103 | 1 | 519.6019 | 1555.784 | 3 | 44.15 | 0.00013 | SXPFKXSPYFGR  | Phospho (ST) | 0.0000001000000.0 | Synth_pep_375V.1240.1240.3.dta             |
| SXPFKXSPXFGR 7 9 3 1 1588 | 1 | 533.5932 | 1597.758 | 3 | 42.66 | 0.00013 | SXPFKXSPYFGR  | Phospho (ST) | 0.0000001000000.0 | Synth_pep_375V.1114.1114.3.dta             |
| SXPFKXSPXFGR 2 2 9 0 459  | 1 | 546.2515 | 1635.733 | 3 | 42.78 | 0.00013 | SXPFKXSPYFGR  | Phospho (ST) | 0.0000001000000.0 | AIC_synth_45.1109.1109.3.dta               |
| SXPFKXSPXFGR 9 9 3 1 1988 | 1 | 554.2652 | 1659.774 | 3 | 44.01 | 0.00013 | SXPFKXSPYFGR  | Phospho (ST) | 0.0000001000000.0 | Synth_pep_425V.1161.1161.3.dta             |
| GPSGXVSAQXLR 6 1 0 0 1221 | 1 | 662.7956 | 1323.577 | 2 | 47.55 | 0.00013 | GPSGVVSAQFLR  | Phospho (ST) | 0.0000001000000.0 | Synth_pep_35V.744.744.2.dta                |
| GPSGXVSAQXLR 0 4 2 0 85   | 1 | 654.7998 | 1307.585 | 2 | 46.15 | 0.00013 | GPSGVVSAQFLER | Phospho (ST) | 0.0000001000000.0 | Synth_pep_30V_120502214048.776.776.2.dta   |
| SXPFKXSPXFGR 4 6 9 0 939  | 1 | 508.2398 | 1521.698 | 3 | 49.08 | 0.00013 | SXPFKXSPYFGR  | Phospho (ST) | 0.0000001000000.0 | Synth_pep_425V.930.930.3.dta               |
| GPSGXVSAQXLR 4 4 6 1 894  | 1 | 612.7855 | 1223.556 | 2 | 42.8  | 0.00013 | GPSGVVSAQFLSK | Phospho (ST) | 0.0000001000000.0 | Synth_pep_275V.725.725.2.dta               |
| GPSGXVSAQXLR 5 1 8 0 1037 | 1 | 689.8401 | 1377.666 | 2 | 43.96 | 0.00013 | GPSGVVSAQFLVR | Phospho (ST) | 0.0000001000000.0 | AIC_synth_test_25.1274.1274.2.dta          |
| GPSGXVSAQXLR 0 4 1 0 813  | 1 | 647.7916 | 1293.569 | 2 | 48.58 | 0.00013 | GPSGVVSAQFLDR | Phospho (ST) | 0.0000001000000.0 | Synth_pep_30V_120502214048.760.760.2.dta   |
| SXPFKXSPXFGR 4 9 9 0 999  | 1 | 533.5845 | 1597.732 | 3 | 41.77 | 0.00013 | SXPFKXSPYFGR  | Phospho (ST) | 0.0000001000000.0 | Synth_pep_425V.1043.1043.3.dta             |
| SXPFKXSPXFGR 4 3 8 1 878  | 1 | 497.5867 | 1489.738 | 3 | 40.61 | 0.00013 | SXPFKXSPYFGR  | Phospho (ST) | 0.0000001000000.0 | AIC_synth_45.1485.1485.3.dta               |
| GPSGXVSAQXLR 1 0 6 0 213  | 1 | 662.7981 | 1323.582 | 2 | 44.79 | 0.00013 | GPSGVVSAQFLSR | Phospho (ST) | 0.0000001000000.0 | AIC_synth_test_25.816.816.2.dta            |
| GPSGXVSAQXLR 0 8 4 1 170  | 1 | 625.8109 | 1249.607 | 2 | 40.19 | 0.00013 | GPSGVVSAQFLK  | Phospho (ST) | 0.0000001000000.0 | Synth_pep_325V.856.856.2.dta               |
| GPSGXVSAQXLR 3 9 8 1 798  | 1 | 716.8483 | 1431.682 | 2 | 46.08 | 0.00013 | GPSGVVSAQFLVK | Phospho (ST) | 0.0000001000000.0 | Synth_pep_30V_120502214048.1217.1217.2.dta |
| SXPFKXSPXFGR 4 6 2 0 925  | 1 | 496.9007 | 1487.68  | 3 | 46.46 | 0.00013 | SXPFKXSPYFGR  | Phospho (ST) | 0.0000001000000.0 | AIC_synth_45.1015.1015.3.dta               |
| SXPFKXSPXFGR 2 2 0 0 441  | 1 | 515.5754 | 1543.705 | 3 | 46.93 | 0.00013 | SXPFKXSPYFGR  | Phospho (ST) | 0.0000001000000.0 | Synth_pep_40V.912.912.3.dta                |
| SXPFKXSPXFGR 8 8 2 0 1765 | 1 | 514.9279 | 1541.762 | 3 | 46.68 | 0.00013 | SXPFKXSPYFGR  | Phospho (ST) | 0.0000001000000.0 | AIC_synth_45.1337.1337.3.dta               |
| SXPFKXSPXFGR 3 5 9 0 719  | 1 | 546.9404 | 1637.799 | 3 | 39.56 | 0.00013 | SXPFKXSPYFGR  | Phospho (ST) | 0.0000001000000.0 | Synth_pep_40V.1271.1271.3.dta              |
| SXPFKXSPXFGR 1 0 9 1 220  | 1 | 512.9092 | 1535.706 | 3 | 48.1  | 0.00013 | SXPFKXSPYFGR  | Phospho (ST) | 0.0000001000000.0 | Synth_pep_375V.1005.1005.3.dta             |
| GPSGXVSAQXLR 4 8 4 1 970  | 1 | 618.8032 | 1235.592 | 2 | 38.96 | 0.00013 | GPSGVVSAQFLGK | Phospho (ST) | 0.0000001000000.0 | Synth_pep_275V.864.864.2.dta               |
| GPSGXVSAQXLR 9 1 2 1 1826 | 1 | 715.8148 | 1429.615 | 2 | 44.31 | 0.00013 | GPSGVVSAQFLK  | Phospho (ST) | 0.0000001000000.0 | Synth_pep_275V.835.835.2.dta               |
| GPSGXVSAQXLR 9 2 9 1 1860 | 1 | 739.8314 | 1477.648 | 2 | 44.81 | 0.00013 | GPSGVVSAQFLYK | Phospho (ST) | 0.0000001000000.0 | Synth_pep_325V.930.930.2.dta               |
| SXPFKXSPXFGR 5 4 2 1 1086 | 1 | 496.2489 | 1485.725 | 3 | 47.34 | 0.00013 | SXPFKXSPYFGR  | Phospho (ST) | 0.0000001000000.0 | Synth_pep_40V.1008.1008.3.dta              |
| GPSGXVSAQXLR 6 9 9 1 1400 | 1 | 718.8264 | 1435.638 | 2 | 49.87 | 0.00013 | GPSGVVSAQFLYK | Phospho (ST) | 0.0000001000000.0 | Synth_pep_35V.912.912.2.dta                |
| GPSGXVSAQXLR 1 0 2 0 205  | 1 | 683.8029 | 1365.591 | 2 | 46.47 | 0.00013 | GPSGDVSAQFLER | Phospho (ST) | 0.0000001000000.0 | Synth_pep_325V.778.778.2.dta               |
| GPSGXVSAQXLR 0 6 4 0 129  | 1 | 633.7933 | 1265.572 | 2 | 48.47 | 0.00013 | GPSGVVSAQFLGR | Phospho (ST) | 0.0000001000000.0 | Synth_pep_30V_120502214048.736.736.2.dta   |
| GPSGXVSAQXLR 5 2 9 1 1060 | 1 | 714.844  | 1427.673 | 2 | 44.29 | 0.00013 | GPSGVVSAQFLYK | Phospho (ST) | 0.0000001000000.0 | Synth_pep_30V_120502214048.1042.1042.2.dta |
| GPSGXVSAQXLR 9 5 5 0 1911 | 1 | 480.9131 | 1439.717 | 3 | 42.4  | 0.00012 | GPSGVVSAQFLR  | Phospho (ST) | 0.0000001000000.0 | Synth_pep_425V.1325.1325.3.dta             |
| GPSGXVSAQXLR 5 3 8 0 1077 | 1 | 470.9095 | 1409.707 | 3 | 40.08 | 0.00012 | GPSGVVSAQFLVR | Phospho (ST) | 0.0000001000000.0 | AIC_synth_45.1703.1703.3.dta               |
| GPSGXVSAQXLR 2 2 9 0 459  | 1 | 491.5511 | 1471.632 | 3 | 46.16 | 0.00012 | GPSGVVSEAQLYR | Phospho (ST) | 0.0000001000000.0 | Synth_pep_425V.838.838.3.dta               |
| GPSGXVSAQXLR 5 9 5 1 1192 | 1 | 471.5786 | 1411.714 | 3 | 45.35 | 0.00012 | GPSGVVSAQFLK  | Phospho (ST) | 0.0000001000000.0 | AIC_synth_45.1600.1600.3.dta               |
| SXPFKXSPXFGR 2 8 1 0 563  | 1 | 520.2477 | 1557.721 | 3 | 46.71 | 0.00012 | SXPFKXSPYFGR  | Phospho (ST) | 0.0000001000000.0 | Synth_pep_40V.1064.1064.3.dta              |
| GPSGXVSAQXLR 0 4 0 1 82   | 1 | 611.7961 | 1221.578 | 2 | 39.3  | 0.00012 | GPSGVVSAQFLAK | Phospho (ST) | 0.0000001000000.0 | Synth_pep_375V.729.729.2.dta               |
| SXPFKXSPXFGR 7 2 3 1 463  | 1 | 536.2484 | 1605.723 | 3 | 44.76 | 0.00012 | SXPFKXSPYFGR  | Phospho (ST) | 0.0000001000000.0 | Synth_pep_375V.1184.1184.3.dta             |
| GPSGXVSAQXLR 0 5 3 1 108  | 1 | 677.8427 | 1353.671 | 2 | 44.78 | 0.00012 | GPSGVVSAQFLFK | Phospho (ST) | 0.0000001000000.0 | Synth_pep_35V.1288.1288.2.dta              |
| GPSGXVSAQXLR 0 5 0 1 102  | 1 | 639.8267 | 1277.639 | 2 | 43.48 | 0.00012 | GPSGVVSAQFLAK | Phospho (ST) | 0.0000001000000.0 | Synth_pep_325V.1043.1043.2.dta             |
| SXPFKXSPXFGR 2 2 2 0 445  | 1 | 801.8629 | 1601.711 | 2 | 42.28 | 0.00012 | SXPFKXSPYFGR  | Phospho (ST) | 0.0000001000000.0 | Synth_pep_275V.980.980.2.dta               |
| GPSGXVSAQXLR 8 0 4 1 1610 | 1 | 625.811  | 1249.608 | 2 | 40.43 | 0.00012 | GPSGVVSAQFLGK | Phospho (ST) | 0.0000001000000.0 | Synth_pep_275V.867.867.2.dta               |
| SXPFKXSPXFGR 8 0 8 1 1618 | 1 | 486.2581 | 1455.752 | 3 | 45.65 | 0.00012 | SXPFKXSPYFGR  | Phospho (ST) | 0.0000001000000.0 | Synth_pep_40V.1048.1048.3.dta              |
| GPSGXVSAQXLR 4 0 8 1 818  | 1 | 625.8108 | 1249.607 | 2 | 40.37 | 0.00012 | GPSGVVSAQFLVK | Phospho (ST) | 0.0000001000000.0 | Synth_pep_325V.939.939.2.dta               |
| GPSGXVSAQXLR 4 3 5 0 871  | 1 | 684.8351 | 1367.656 | 2 | 46.84 | 0.00012 | GPSGVVSAQFLR  | Phospho (ST) | 0.0000001000000.0 | Synth_pep_30V_120502214048.1307.1307.2.dta |
| GPSGXVSAQXLR 0 3 3 1 68   | 1 | 694.8342 | 1387.654 | 2 | 48.07 | 0.00012 | GPSGVVSAQFLK  | Phospho (ST) | 0.0000001000000.0 | Synth_pep_35V.1304.1304.2.dta              |
| GPSGXVSAQXLR 0 0 3 1 8    | 1 | 656.8176 | 1311.621 | 2 | 47.3  | 0.00012 | GPSGVVSAQFLFK | Phospho (ST) | 0.0000001000000.0 | Synth_pep_30V_120502214048.1090.1090.2.dta |
| GPSGXVSAQXLR 2 5 7 0 515  | 1 | 697.8369 | 1393.659 | 2 | 44.95 | 0.00012 | GPSGVVSAQFLTR | Phospho (ST) | 0.0000001000000.0 | Synth_pep_3                                |

|                            |   |          |          |   |       |          |               |              |                   |                                            |
|----------------------------|---|----------|----------|---|-------|----------|---------------|--------------|-------------------|--------------------------------------------|
| GPSGVXSXAQLXR 6 5 8 0 1317 | 1 | 450.8969 | 1349.669 | 3 | 41.27 | 0.00011  | GPSGSVLAQLVR  | Phospho (ST) | 0.0000001000000.0 | AIC_synth_45.1338.1338.3.dta               |
| GPSGVXSXAQLXR 9 0 4 1 1810 | 1 | 657.8098 | 1313.605 | 2 | 47.51 | 0.00011  | GPSGVSSAAQLGK | Phospho (ST) | 0.0000001000000.0 | AIC_synth_test_25.975.975.2.dta            |
| GPSGVXSXAQLXR 0 4 9 0 99   | 1 | 671.8113 | 1341.608 | 2 | 43.09 | 0.0001   | GPSGVSSGAQLYR | Phospho (ST) | 0.0000001000000.0 | Synth_pep_325V.872.872.2.dta               |
| SXPFKXSLXFGJR 4 5 8 0 917  | 1 | 742.8881 | 1483.762 | 2 | 41.6  | 0.0001   | SGPFKLSPLVFGR | Phospho (ST) | 0.0000001000000.0 | AIC_synth_test_25.1610.1610.2.dta          |
| GPSGVXSXAQLXR 2 9 5 0 591  | 1 | 728.8441 | 1455.674 | 2 | 46    | 0.0001   | GPSGVSVAQLLR  | Phospho (ST) | 0.0000001000000.0 | Synth_pep_30V_120502214048.1128.1128.2.dta |
| SXPFKXSLXFGJR 4 6 6 1 934  | 1 | 473.5604 | 1417.659 | 3 | 50    | 0.0001   | SGPFKSSPLSFGK | Phospho (ST) | 0.0000001000000.0 | Synth_pep_325V.876.876.3.dta               |
| SXPFKXSLXFGJR 3 6 3 1 728  | 1 | 523.589  | 1567.745 | 3 | 44.14 | 0.0001   | SFPFKSSPLFFGK | Phospho (ST) | 0.0000001000000.0 | Synth_pep_40V.1103.1103.3.dta              |
| SXPFKXSLXFGJR 4 6 2 0 925  | 1 | 496.8995 | 1487.677 | 3 | 49.03 | 0.0001   | SFPFKSSPLEFGR | Phospho (ST) | 0.0000001000000.0 | Synth_pep_425V.898.898.3.dta               |
| GPSGVXSXAQLXR 2 4 9 1 500  | 1 | 686.8103 | 1371.606 | 2 | 48.18 | 0.0001   | GPSGVSVAQLYK  | Phospho (ST) | 0.0000001000000.0 | Synth_pep_35V.801.801.2.dta                |
| GPSGVXSXAQLXR 4 3 9 0 879  | 1 | 709.8255 | 1417.636 | 2 | 48.04 | 0.0001   | GPSGVSFAQLYR  | Phospho (ST) | 0.0000001000000.0 | Synth_pep_30V_120502214048.1139.1139.2.dta |
| SXPFKXSLXFGJR 8 6 3 1 1728 | 1 | 507.5897 | 1519.747 | 3 | 47.09 | 0.0001   | SVPFKSSPLFFGK | Phospho (ST) | 0.0000001000000.0 | Synth_pep_40V.1025.1025.3.dta              |
| SXPFKXSLXFGJR 4 5 4 0 909  | 1 | 481.5772 | 1441.71  | 3 | 48.38 | 0.0001   | SGPFKLSPLGFGR | Phospho (ST) | 0.0000001000000.0 | AIC_synth_45.1372.1372.3.dta               |
| SXPFKXSLXFGJR 8 3 9 1 1680 | 1 | 532.9342 | 1595.781 | 3 | 42.52 | 0.0001   | SVPFKSSPLYFGK | Phospho (ST) | 0.0000001000000.0 | Synth_pep_375V.1185.1185.3.dta             |
| GPSGVXSXAQLXR 0 9 1 20     | 1 | 664.8159 | 1327.617 | 2 | 47.62 | 0.0001   | GPSGAVSAAQLYK | Phospho (ST) | 0.0000001000000.0 | Synth_pep_35V.864.864.2.dta                |
| SXPFKXSLXFGJR 0 3 4 1 70   | 1 | 488.243  | 1461.707 | 3 | 42.07 | 0.0001   | SAPFKSPLGFGK  | Phospho (ST) | 0.0000001000000.0 | AIC_synth_45.1398.1398.3.dta               |
| SXPFKXSLXFGJR 0 1 0 0 21   | 1 | 491.5698 | 1471.688 | 3 | 47.18 | 9.90E-05 | SAPFKDSPLAFGR | Phospho (ST) | 0.0000001000000.0 | AIC_synth_45.1036.1036.3.dta               |
| GPSGVXSXAQLXR 5 9 8 1 1198 | 1 | 699.8569 | 1397.699 | 2 | 46.99 | 9.90E-05 | GPSGLVSAQLVK  | Phospho (ST) | 0.0000001000000.0 | Synth_pep_325V.1175.1175.2.dta             |
| SXPFKXSLXFGJR 6 4 2 1 1286 | 1 | 487.566  | 1459.676 | 3 | 48.22 | 9.90E-05 | SFPFKSSPLEFGR | Phospho (ST) | 0.0000001000000.0 | Synth_pep_375V.890.890.3.dta               |
| GPSGVXSXAQLXR 1 8 2 0 365  | 1 | 697.8184 | 1393.622 | 2 | 46.92 | 9.70E-05 | GPSGDVSAQLER  | Phospho (ST) | 0.0000001000000.0 | Synth_pep_325V.899.899.2.dta               |
| GPSGVXSXAQLXR 2 9 9 1 600  | 1 | 739.8311 | 1477.648 | 2 | 46.21 | 9.70E-05 | GPSGVSVAQLYK  | Phospho (ST) | 0.0000001000000.0 | Synth_pep_35V.938.938.2.dta                |
| SXPFKXSLXFGJR 1 3 9 0 279  | 1 | 547.5872 | 1639.74  | 3 | 43.68 | 9.70E-05 | SDFPKSPLVFGR  | Phospho (ST) | 0.0000001000000.0 | Synth_pep_40V.1209.1209.3.dta              |
| GPSGVXSXAQLXR 8 8 8 1 1778 | 1 | 660.8502 | 1319.686 | 2 | 45.3  | 9.60E-05 | GPSGVSSVAQLVK | Phospho (ST) | 0.0000001000000.0 | Synth_pep_325V.1111.1111.2.dta             |
| GPSGVXSXAQLXR 5 2 6 0 1053 | 1 | 690.8287 | 1379.643 | 2 | 46.83 | 9.60E-05 | GPSGLVSEAQLSR | Phospho (ST) | 0.0000001000000.0 | Synth_pep_35V.920.920.2.dta                |
| GPSGVXSXAQLXR 6 4 1 1 1284 | 1 | 641.7879 | 1281.561 | 2 | 44.26 | 9.60E-05 | GPSGVSSGAQLDK | Phospho (ST) | 0.0000001000000.0 | Synth_pep_325V.712.712.2.dta               |
| GPSGVXSXAQLXR 5 3 5 1 1072 | 1 | 466.2473 | 1395.72  | 3 | 43.94 | 9.50E-05 | GPSGLVSAQLLK  | Phospho (ST) | 0.0000001000000.0 | AIC_synth_45.1854.1854.3.dta               |
| SXPFKXSLXFGJR 9 9 9 1 2000 | 1 | 559.5972 | 1675.77  | 3 | 42.76 | 9.50E-05 | SYPFKSPLYFGK  | Phospho (ST) | 0.0000001000000.0 | Synth_pep_375V.1080.1080.3.dta             |
| GPSGVXSXAQLXR 3 5 9 1 720  | 1 | 723.8557 | 1445.697 | 2 | 47.78 | 9.50E-05 | GPSGVSFAQLYK  | Phospho (ST) | 0.0000001000000.0 | Synth_pep_275V.1400.1400.2.dta             |
| GPSGVXSXAQLXR 1 0 4 6 1 94 | 1 | 619.7926 | 1237.571 | 2 | 47.5  | 9.50E-05 | GPSGAVSQAQLSK | Phospho (ST) | 0.0000001000000.0 | Synth_pep_325V.714.714.2.dta               |
| GPSGVXSXAQLXR 9 9 3 0 1987 | 1 | 762.8465 | 1523.678 | 2 | 51.33 | 9.50E-05 | GPSGVSSVAQLFR | Phospho (ST) | 0.0000001000000.0 | Synth_pep_30V_120502214048.1288.1288.2.dta |
| GPSGVXSXAQLXR 8 8 3 1 1768 | 1 | 456.9018 | 1367.684 | 3 | 48.22 | 9.50E-05 | GPSGDVSAQLFK  | Phospho (ST) | 0.0000001000000.0 | Synth_pep_40V.1251.1251.3.dta              |
| GPSGVXSXAQLXR 9 8 0 1 1962 | 1 | 678.8341 | 1355.654 | 2 | 47.02 | 9.50E-05 | GPSGVSSVAQLAK | Phospho (ST) | 0.0000001000000.0 | AIC_synth_test_25.1231.1231.2.dta          |
| GPSGVXSXAQLXR 0 5 8 0 117  | 1 | 445.5653 | 1333.674 | 3 | 41.59 | 9.40E-05 | GPSGAVSQAQLVR | Phospho (ST) | 0.0000001000000.0 | AIC_synth_45.1406.1406.3.dta               |
| GPSGVXSXAQLXR 5 8 1 0 1163 | 1 | 689.8414 | 1377.668 | 2 | 45.77 | 9.40E-05 | GPSGLVSAQLDR  | Phospho (ST) | 0.0000001000000.0 | AIC_synth_test_25.1391.1391.2.dta          |
| GPSGVXSXAQLXR 9 3 3 0 1863 | 1 | 738.8287 | 1475.643 | 2 | 46.67 | 9.40E-05 | GPSGVSSFAQLDR | Phospho (ST) | 0.0000001000000.0 | Synth_pep_275V.1149.1149.2.dta             |
| SXPFKXSLXFGJR 8 9 9 0 1799 | 1 | 547.6003 | 1639.779 | 3 | 40.32 | 9.30E-05 | SVPFKSPLVFGR  | Phospho (ST) | 0.0000001000000.0 | AIC_synth_45.1334.1334.3.dta               |
| SXPFKXSLXFGJR 5 0 9 1 1020 | 1 | 512.2617 | 1533.763 | 3 | 46.61 | 9.30E-05 | SPLFKASPLYFGK | Phospho (ST) | 0.0000001000000.0 | Synth_pep_35V.1082.1082.3.dta              |
| GPSGVXSXAQLXR 9 8 5 1 1972 | 1 | 699.8552 | 1397.696 | 2 | 47.31 | 9.20E-05 | GPSGVSSVAQLLK | Phospho (ST) | 0.0000001000000.0 | Synth_pep_30V_120502214048.1272.1272.2.dta |
| GPSGVXSXAQLXR 0 9 8 0 197  | 1 | 692.8351 | 1383.656 | 2 | 44.67 | 9.20E-05 | GPSGVSVAQLVR  | Phospho (ST) | 0.0000001000000.0 | Synth_pep_375V.968.968.2.dta               |
| GPSGVXSXAQLXR 9 0 3 0 1807 | 1 | 716.8357 | 1431.657 | 2 | 47.58 | 9.20E-05 | GPSGVSSAAQLFR | Phospho (ST) | 0.0000001000000.0 | AIC_synth_test_25.1546.1546.2.dta          |
| SXPFKXSLXFGJR 1 0 2 0 205  | 1 | 765.8516 | 1529.689 | 2 | 49.44 | 9.20E-05 | SDFPKSPLFEGR  | Phospho (ST) | 0.0000001000000.0 | Synth_pep_30V_120502214048.1027.1027.2.dta |
| GPSGVXSXAQLXR 3 4 9 1 700  | 1 | 695.8236 | 1389.633 | 2 | 48.14 | 9.20E-05 | GPSGVSSGAQLYK | Phospho (ST) | 0.0000001000000.0 | Synth_pep_275V.1044.1044.2.dta             |
| GPSGVXSXAQLXR 3 0 8 1 618  | 1 | 670.8347 | 1339.655 | 2 | 49.93 | 9.10E-05 | GPSGVSVAQLVK  | Phospho (ST) | 0.0000001000000.0 | AIC_synth_test_25.1420.1420.2.dta          |
| SXPFKXSLXFGJR 5 8 1 0 1163 | 1 | 771.8903 | 1541.766 | 2 | 47.22 | 9.00E-05 | SPLFKVSLDFGR  | Phospho (ST) | 0.0000001000000.0 | Synth_pep_275V.1304.1304.2.dta             |
| SXPFKXSLXFGJR 6 3 9 1 1280 | 1 | 528.9216 | 1583.743 | 3 | 46.84 | 9.00E-05 | SFPFKSPLVFGK  | Phospho (ST) | 0.0000001000000.0 | AIC_synth_45.1476.1476.3.dta               |
| GPSGVXSXAQLXR 4 4 3 0 887  | 1 | 656.8063 | 1311.598 | 2 | 47.13 | 9.00E-05 | GPSGVSQAQLFR  | Phospho (ST) | 0.0000001000000.0 | AIC_synth_test_25.1213.1213.2.dta          |
| GPSGVXSXAQLXR 0 6 1 0 123  | 1 | 662.7954 | 1323.576 | 2 | 49.1  | 8.90E-05 | GPSGAVSQAQLDR | Phospho (ST) | 0.0000001000000.0 | Synth_pep_275V.752.752.2.dta               |
| GPSGVXSXAQLXR 1 0 2 1 206  | 1 | 669.8027 | 1337.591 | 2 | 47.51 | 8.80E-05 | GPSGDVSAQLEK  | Phospho (ST) | 0.0000001000000.0 | Synth_pep_30V_120502214048.777.777.2.dta   |
| GPSGVXSXAQLXR 9 2 2 0 1845 | 1 | 736.8253 | 1471.636 | 2 | 48.04 | 8.80E-05 | GPSGVSSVAQLER | Phospho (ST) | 0.0000001000000.0 | AIC_synth_test_25.996.996.2.dta            |
| SXPFKXSLXFGJR 3 9 3 1 788  | 1 | 548.9344 | 1643.871 | 3 | 44.42 | 8.70E-05 | SFPFKSPLFFGK  | Phospho (ST) | 0.0000001000000.0 | Synth_pep_375V.1244.1244.3.dta             |
| SXPFKXSLXFGJR 5 0 2 0 1005 | 1 | 510.2564 | 1527.747 | 3 | 48.47 | 8.70E-05 | SPLFKASPLFEGR | Phospho (ST) | 0.0000001000000.0 | Synth_pep_425V.1014.1014.2.dta             |
| SXPFKXSLXFGJR 4 1 9 1 840  | 1 | 508.2375 | 1521.691 | 3 | 49.94 | 8.70E-05 | SGPFKLSPLVFGK | Phospho (ST) | 0.0000001000000.0 | Synth_pep_375V.945.945.3.dta               |
| GPSGVXSXAQLXR 1 8 3 1 368  | 1 | 692.829  | 1383.644 | 2 | 48.59 | 8.70E-05 | GPSGVSVAQLFK  | Phospho (ST) | 0.0000001000000.0 | Synth_pep_375V.1155.1155.2.dta             |
| GPSGVXSXAQLXR 5 8 2 1 1166 | 1 | 682.8466 | 1363.679 | 2 | 48.04 | 8.70E-05 | GPSGLVSAQLEK  | Phospho (ST) | 0.0000001000000.0 | AIC_synth_test_25.1361.1361.2.dta          |
| SXPFKXSLXFGJR 1 3 3 1 268  | 1 | 532.9215 | 1595.743 | 3 | 42.81 | 8.60E-05 | SDFPKSPLFFGK  | Phospho (ST) | 0.0000001000000.0 | Synth_pep_425V.1289.1289.3.dta             |
| GPSGVXSXAQLXR 2 8 8 0 577  | 1 | 689.8408 | 1377.667 | 2 | 46.26 | 8.60E-05 | GPSGVSVAQLVR  | Phospho (ST) | 0.0000001000000.0 | Synth_pep_375V.1014.1014.2.dta             |
| SXPFKXSLXFGJR 5 0 2 0 1005 | 1 | 510.2562 | 1527.747 | 3 | 48.53 | 8.60E-05 | SPLFKASPLFEGR | Phospho (ST) | 0.0000001000000.0 | Synth_pep_40V.1042.1042.3.dta              |
| GPSGVXSXAQLXR 0 1 5 0 31   | 1 | 675.8236 | 1349.633 | 2 | 46.61 | 8.60E-05 | GPSGAVSQAQLLR | Phospho (ST) | 0.0000001000000.0 | Synth_pep_275V.964.964.2.dta               |
| SXPFKXSLXFGJR 0 0 0 0 1    | 1 | 476.9055 | 1427.695 | 3 | 48.78 | 8.50E-05 | SAPFKASPLAFGR | Phospho (ST) | 0.0000001000000.0 | Synth_pep_425V.922.922.3.dta               |
| GPSGVXSXAQLXR 5 2 6 0 1053 | 1 | 690.8295 | 1379.644 | 2 | 47.36 | 8.50E-05 | GPSGLVSEAQLSR | Phospho (ST) | 0.0000001000000.0 | Synth_pep_375V.932.932.2.dta               |
| GPSGVXSXAQLXR 3 4 4 1 690  | 1 | 642.8016 | 1283.589 | 2 | 45.27 | 8.50E-05 | GPSGVSQAQLGK  | Phospho (ST) | 0.0000001000000.0 | Synth_pep_30V_120502214048.897.897.2.dta   |
| SXPFKXSLXFGJR 1 3 0 1 262  | 1 | 507.578  | 1519.712 | 3 | 48.1  | 8.40E-05 | SDFPKSPLAFGR  | Phospho (ST) | 0.0000001000000.0 | Synth_pep_35V.1194.1194.3.dta              |
| GPSGVXSXAQLXR 2 2 6 0 453  | 1 | 698.8087 | 1395.603 | 2 | 48.52 | 8.40E-05 | GPSGLVSEAQLSR | Phospho (ST) | 0.0000001000000.0 | Synth_pep_325V.745.745.2.dta               |
| SXPFKXSLXFGJR 1 3 3 0 267  | 1 | 542.2572 | 1623.75  | 3 | 40.99 | 8.40E-05 | SDFPKSPLFFGK  | Phospho (ST) | 0.0000001000000.0 | AIC_synth_45.1740.1740.3.dta               |
| SXPFKXSLXFGJR 4 0 5 1 812  | 1 | 476.9152 | 1427.724 | 3 | 44.62 | 8.30E-05 | SGPFKASPLFFGK | Phospho (ST) | 0.0000001000000.0 | Synth_pep_425V.1009.1009.3.dta             |
| GPSGVXSXAQLXR 3 0 0 1 602  | 1 | 656.8194 | 1311.624 | 2 | 46.67 | 8.30E-05 | GPSGFVSAQLAK  | Phospho (ST) | 0.0000001000000.0 | Synth_pep_30V_120502214048.1001.1001.2.dta |
| GPSGVXSXAQLXR 1 4 6 1 294  | 1 | 641.7869 | 1281.559 | 2 | 44.88 | 8.30E-05 | GPSGLVSAQLSK  | Phospho (ST) | 0.0000001000000.0 | Synth_pep_35V.713.713.2.dta                |
| GPSGVXSXAQLXR 5 5 3 1 1108 | 1 | 698.866  | 1395.718 | 2 | 45.56 | 8.20E-05 | GPSGLVLAQLFK  | Phospho (ST) | 0.0000001000000.0 | Synth_pep_375V.1456.1456.2.dta             |
| SXPFKXSLXFGJR 6 6 9 1 1340 | 1 | 508.9085 | 1523.704 | 3 | 48.49 | 8.10E-05 | SFPFKSPLVFGK  | Phospho (ST) | 0.0000001000000.0 | Synth_pep_425V.915.915.3.dta               |
| GPSGVXSXAQLXR 2 7 1 1 544  | 1 | 684.8074 | 1367.6   | 2 | 42.22 | 8.10E-05 | GPSGLVSTAQLDK | Phospho (ST) | 0.0000001000000.0 | Synth_pep_325V.730.730.2.dta               |
| GPSGVXSXAQLXR 1 5 5 0 311  | 1 | 696.8481 | 1391.682 | 2 | 48.38 | 8.00E-05 | GPSGDVSAQLLR  | Phospho (ST) | 0.0000001000000.0 | Synth_pep_325V.1272.1272.2.dta             |
| GPSGVXSXAQLXR 1 6 1 0 323  | 1 | 456.8641 | 1367.571 | 3 | 45.04 | 8.00E-05 | GPSGDVSSAQLDR | Phospho (ST) | 0.0000001000000.0 | Synth_pep_425V.729.729.3.dta               |
| GPSGVXSXAQLXR 6 2 1 0 1243 | 1 | 461.536  | 1381.586 | 3 | 47.29 | 7.70E-05 | GPSGVSVAQLDR  | Phospho (ST) | 0.0000001000000.0 | Synth_pep_40V.739.739.3.dta                |
| GPSGVXSXAQLXR 2 0 2 0 405  | 1 | 690.8118 | 1379.609 | 2 | 47.73 | 7.80E-05 | GPSGVSAAQLER  | Phospho (ST) | 0.0000001000000.0 | Synth_pep_30V_120502214048.794.794.2.dta   |
| GPSGVXSXAQLXR 5 5 3 1 1108 | 1 | 698.8666 | 1395.719 | 2 | 44.84 | 7.70E-05 | GPSGLVLAQLFK  | Phospho (ST) | 0.0000001000000.0 | Synth_pep_275V.1632.1632.2.dta             |
| GPSGVXSXAQLXR 6 5 3 0 1307 | 1 | 699.8394 | 1397.664 | 2 | 50.22 | 7.70E-05 | GPSGLVSAQLFR  | Phospho (ST) | 0.0000001000000.0 | Synth_pep_30V_120502214048.1346.1346.2.dta |
| GPSGVXSXAQLXR 4 8 0 0 961  | 1 | 639.8142 | 1277.614 | 2 | 51.58 | 7.70E-05 | GPSGVSVAQLLR  | Phospho (ST) | 0.0000001000000.0 | Synth_pep_325V.895.895.2.dta               |
| GPSGVXSXAQLXR 8 1 7 0 1635 | 1 | 683.8226 | 1365.631 | 2 | 47.97 | 7.70E-05 | GPSGVSSAQLTR  | Phospho (ST) | 0.0000001000000.0 | Synth_pep_35V.841.841.2.dta                |
| SXPFKXSLXFGJR 1            |   |          |          |   |       |          |               |              |                   |                                            |

|                           |   |          |          |   |       |          |                |              |                   |                                            |
|---------------------------|---|----------|----------|---|-------|----------|----------------|--------------|-------------------|--------------------------------------------|
| GPSGXVSAQXLR 1 2 0 0 241  | 1 | 683.8029 | 1365.591 | 2 | 49.32 | 6.90E-05 | GPSGDVSEAQLAR  | Phospho (ST) | 0.0000001000000.0 | Synth_pep_35V.769.769.2.dta                |
| GPSGXVSAQXLR 5 4 0 1 1082 | 1 | 632.8174 | 1263.62  | 2 | 45.71 | 6.80E-05 | GPSGLVSGAQLAK  | Phospho (ST) | 0.0000001000000.0 | Synth_pep_30V_120502214048.880.880.2.dta   |
| GPSGXVSAQXLR 9 9 1 1 1984 | 1 | 732.827  | 1463.639 | 2 | 50.14 | 6.80E-05 | GPSGVYSAQLDK   | Phospho (ST) | 0.0000001000000.0 | Synth_pep_275V.985.985.2.dta               |
| GPSGXVSAQXLR 1 4 5 1 292  | 1 | 654.8115 | 1307.608 | 2 | 48.73 | 6.80E-05 | GPSGVSGAQLLK   | Phospho (ST) | 0.0000001000000.0 | Synth_pep_30V_120502214048.947.947.2.dta   |
| GPSGXVSAQXLR 2 2 9 1 460  | 1 | 722.8212 | 1443.628 | 2 | 47.17 | 6.80E-05 | GPSGVEAQLYK    | Phospho (ST) | 0.0000001000000.0 | Synth_pep_35V.834.834.2.dta                |
| GPSGXVSAQXLR 4 5 4 1 910  | 1 | 625.8096 | 1249.605 | 2 | 43.05 | 6.70E-05 | GPSGVSLAQLGK   | Phospho (ST) | 0.0000001000000.0 | Synth_pep_30V_120502214048.953.953.2.dta   |
| GPSGXVSAQXLR 5 5 0 1 1102 | 1 | 660.8508 | 1319.687 | 2 | 46.85 | 6.70E-05 | GPSGLVSLAQLAK  | Phospho (ST) | 0.0000001000000.0 | Synth_pep_35V.1201.1201.2.dta              |
| GPSGXVSAQXLR 8 7 1 1 1744 | 1 | 669.8215 | 1337.629 | 2 | 48.94 | 6.70E-05 | GPSGVVSTAQLDK  | Phospho (ST) | 0.0000001000000.0 | Synth_pep_375V.828.828.2.dta               |
| GPSGXVSAQXLR 0 8 1 1 164  | 1 | 654.8156 | 1307.617 | 2 | 48.91 | 6.70E-05 | GPSGAVSAQLDK   | Phospho (ST) | 0.0000001000000.0 | AIC_synth_test_25.991.991.2.dta            |
| SXPFKXSPFXFR 5 9 2 1 1186 | 1 | 531.5976 | 1591.771 | 3 | 43.06 | 6.70E-05 | SLPFKVSPLFFGK  | Phospho (ST) | 0.0000001000000.0 | Synth_pep_425V.1097.1097.3.dta             |
| SXPFKXSPFXFR 4 9 0 1 982  | 1 | 493.5748 | 1477.703 | 3 | 50.31 | 6.60E-05 | GPSGVSPYLAFLGK | Phospho (ST) | 0.0000001000000.0 | AIC_synth_45.1188.1188.3.dta               |
| GPSGXVSAQXLR 5 0 5 1 1012 | 1 | 660.8495 | 1319.684 | 2 | 46.95 | 6.60E-05 | GPSGLVSAQAQLLK | Phospho (ST) | 0.0000001000000.0 | Synth_pep_30V_120502214048.1297.1297.2.dta |
| SXPFKXSPFXFR 5 5 2 0 1105 | 1 | 524.2721 | 1569.795 | 3 | 47.11 | 6.60E-05 | SLPFKVSPLFFGK  | Phospho (ST) | 0.0000001000000.0 | Synth_pep_40V.1208.1208.3.dta              |
| SXPFKXSPFXFR 6 0 1 1 1204 | 1 | 487.5651 | 1459.674 | 3 | 49.14 | 6.60E-05 | SXPFKASPLDFGK  | Phospho (ST) | 0.0000001000000.0 | AIC_synth_45.1100.1100.3.dta               |
| GPSGXVSAQXLR 1 1 0 0 221  | 1 | 451.5324 | 1351.575 | 3 | 47.51 | 6.60E-05 | GPSGDVSDAQLAR  | Phospho (ST) | 0.0000001000000.0 | Synth_pep_425V.745.745.3.dta               |
| GPSGXVSAQXLR 9 1 9 1 1840 | 1 | 732.824  | 1463.633 | 2 | 48.76 | 6.60E-05 | GPSGAVSFAQLYK  | Phospho (ST) | 0.0000001000000.0 | Synth_pep_325V.906.906.2.dta               |
| GPSGXVSAQXLR 9 5 5 0 1911 | 1 | 480.9128 | 1439.716 | 3 | 43.66 | 6.50E-05 | GPSGVSLAQLLR   | Phospho (ST) | 0.0000001000000.0 | Synth_pep_40V.1303.1303.3.dta              |
| SXPFKXSPFXFR 2 6 9 1 540  | 1 | 522.9119 | 1565.714 | 3 | 45.85 | 6.50E-05 | SXPFKVSPLYFVGK | Phospho (ST) | 0.0000001000000.0 | Synth_pep_425V.914.914.3.dta               |
| GPSGXVSAQXLR 4 9 4 0 989  | 1 | 664.8016 | 1327.589 | 2 | 49.79 | 6.50E-05 | GPSGVYSAQLGR   | Phospho (ST) | 0.0000001000000.0 | Synth_pep_30V_120502214048.850.850.2.dta   |
| SXPFKXSPFXFR 4 1 3 1 828  | 1 | 502.9056 | 1505.695 | 3 | 48.1  | 6.50E-05 | SGPKFSPLFFGK   | Phospho (ST) | 0.0000001000000.0 | Synth_pep_35V.1061.1061.3.dta              |
| GPSGXVSAQXLR 0 3 0 0 61   | 1 | 670.8199 | 1339.625 | 2 | 48.86 | 6.40E-05 | GPSGAVSFAQLAR  | Phospho (ST) | 0.0000001000000.0 | Synth_pep_30V_120502214048.1083.1083.2.dta |
| SXPFKXSPFXFR 2 8 9 0 579  | 1 | 536.2603 | 1605.759 | 3 | 48.73 | 6.40E-05 | SXPFKVSPLYFGR  | Phospho (ST) | 0.0000001000000.0 | Synth_pep_40V.1068.1068.3.dta              |
| SXPFKXSPFXFR 0 9 3 1 188  | 1 | 523.5894 | 1567.746 | 3 | 46.25 | 6.30E-05 | SXPFKVSPLYFVGK | Phospho (ST) | 0.0000001000000.0 | AIC_synth_45.1388.1388.3.dta               |
| GPSGXVSAQXLR 9 8 3 0 1967 | 1 | 487.5687 | 1459.684 | 3 | 48.08 | 6.30E-05 | GPSGVYSAQLFR   | Phospho (ST) | 0.0000001000000.0 | Synth_pep_425V.1262.1262.3.dta             |
| SXPFKXSPFXFR 5 3 0 0 1061 | 1 | 773.8948 | 1545.775 | 2 | 42.01 | 6.30E-05 | SLPFKVSPLFFGK  | Phospho (ST) | 0.0000001000000.0 | Synth_pep_275V.1393.1393.2.dta             |
| GPSGXVSAQXLR 5 0 0 1 1002 | 1 | 639.8268 | 1277.639 | 2 | 46.31 | 6.30E-05 | GPSGLVSAQAQLAK | Phospho (ST) | 0.0000001000000.0 | Synth_pep_35V.961.961.2.dta                |
| GPSGXVSAQXLR 5 3 0 0 1061 | 1 | 691.8433 | 1381.672 | 2 | 47.2  | 6.30E-05 | GPSGLVSAQAQLAR | Phospho (ST) | 0.0000001000000.0 | Synth_pep_30V_120502214048.1280.1280.2.dta |
| GPSGXVSAQXLR 6 9 3 0 1387 | 1 | 724.8287 | 1447.643 | 2 | 50.73 | 6.30E-05 | GPSGVYSAQLFR   | Phospho (ST) | 0.0000001000000.0 | Synth_pep_30V_120502214048.1170.1170.2.dta |
| SXPFKXSPFXFR 9 0 9 1 1820 | 1 | 528.9212 | 1583.742 | 3 | 48.14 | 6.20E-05 | SXPFKASPLYFVGK | Phospho (ST) | 0.0000001000000.0 | AIC_synth_45.1228.1228.3.dta               |
| SXPFKXSPFXFR 2 8 9 1 580  | 1 | 526.9246 | 1577.752 | 3 | 46.14 | 6.20E-05 | SXPFKVSPLYFVGK | Phospho (ST) | 0.0000001000000.0 | Synth_pep_40V.1039.1039.3.dta              |
| GPSGXVSAQXLR 6 2 6 1 1254 | 1 | 663.8    | 1325.586 | 2 | 48.38 | 6.20E-05 | GPSGVSEQAQLSK  | Phospho (ST) | 0.0000001000000.0 | Synth_pep_35V.724.724.2.dta                |
| GPSGXVSAQXLR 2 4 0 1 482  | 1 | 640.799  | 1279.584 | 2 | 51.58 | 6.20E-05 | GPSGVEGAQLAK   | Phospho (ST) | 0.0000001000000.0 | Synth_pep_375V.728.728.2.dta               |
| GPSGXVSAQXLR 5 8 2 0 1165 | 1 | 696.8495 | 1391.684 | 2 | 48.7  | 6.10E-05 | GPSGAVSAQLER   | Phospho (ST) | 0.0000001000000.0 | AIC_synth_test_25.1408.1408.2.dta          |
| GPSGXVSAQXLR 5 7 0 1 1142 | 1 | 654.8328 | 1307.651 | 2 | 48.35 | 6.10E-05 | GPSGLVSTAQLAK  | Phospho (ST) | 0.0000001000000.0 | Synth_pep_275V.958.958.2.dta               |
| GPSGXVSAQXLR 4 3 3 1 868  | 1 | 687.827  | 1373.64  | 2 | 50.76 | 6.00E-05 | GPSGVEVSAQLFK  | Phospho (ST) | 0.0000001000000.0 | Synth_pep_275V.1433.1433.2.dta             |
| GPSGXVSAQXLR 0 8 1 1 164  | 1 | 654.8136 | 1307.613 | 2 | 49.4  | 6.00E-05 | GPSGAVSAQLDK   | Phospho (ST) | 0.0000001000000.0 | Synth_pep_30V_120502214048.856.856.2.dta   |
| SXPFKXSPFXFR 4 0 9 1 820  | 1 | 493.5743 | 1477.701 | 3 | 50.76 | 5.90E-05 | SGPKASPLYFVGK  | Phospho (ST) | 0.0000001000000.0 | Synth_pep_375V.979.979.3.dta               |
| GPSGXVSAQXLR 3 9 5 0 791  | 1 | 492.2412 | 1473.702 | 3 | 48.68 | 5.90E-05 | GPSGVYSAQLLR   | Phospho (ST) | 0.0000001000000.0 | Synth_pep_425V.1257.1257.3.dta             |
| SXPFKXSPFXFR 3 9 5 1 792  | 1 | 537.6053 | 1609.794 | 3 | 43.09 | 5.90E-05 | SXPFKVSPLFFGK  | Phospho (ST) | 0.0000001000000.0 | Synth_pep_425V.1221.1221.3.dta             |
| GPSGXVSAQXLR 2 5 3 1 508  | 1 | 706.8419 | 1411.669 | 2 | 45.9  | 5.90E-05 | GPSGVEVSAQLFK  | Phospho (ST) | 0.0000001000000.0 | Synth_pep_30V_120502214048.1352.1352.2.dta |
| GPSGXVSAQXLR 4 4 6 1 894  | 1 | 612.7849 | 1223.555 | 2 | 46.28 | 5.80E-05 | GPSGVSEQAQLSK  | Phospho (ST) | 0.0000001000000.0 | Synth_pep_325V.713.713.2.dta               |
| GPSGXVSAQXLR 9 3 3 1 1868 | 1 | 494.2339 | 1479.68  | 3 | 52.31 | 5.80E-05 | GPSGVYSAQLFK   | Phospho (ST) | 0.0000001000000.0 | Synth_pep_375V.1344.1344.3.dta             |
| GPSGXVSAQXLR 9 0 9 0 1819 | 1 | 724.8297 | 1447.645 | 2 | 51.31 | 5.80E-05 | GPSGVYSAQLYR   | Phospho (ST) | 0.0000001000000.0 | Synth_pep_275V.1166.1166.2.dta             |
| SXPFKXSPFXFR 6 8 1 1 1364 | 1 | 496.9091 | 1487.706 | 3 | 48.61 | 5.80E-05 | SXPFKVSPLDFGK  | Phospho (ST) | 0.0000001000000.0 | Synth_pep_425V.1045.1045.3.dta             |
| SXPFKXSPFXFR 4 1 1 1 824  | 1 | 492.2236 | 1473.649 | 3 | 50.75 | 5.80E-05 | SGPKASPLDFGK   | Phospho (ST) | 0.0000001000000.0 | Synth_pep_425V.938.938.3.dta               |
| GPSGXVSAQXLR 5 0 8 1 1018 | 1 | 653.8425 | 1305.67  | 2 | 48.83 | 5.70E-05 | GPSGLVSAQAQLVK | Phospho (ST) | 0.0000001000000.0 | Synth_pep_275V.1131.1131.2.dta             |
| GPSGXVSAQXLR 9 4 0 1 1882 | 1 | 657.8075 | 1313.6   | 2 | 50.64 | 5.70E-05 | GPSGVYSAQAQLAK | Phospho (ST) | 0.0000001000000.0 | Synth_pep_30V_120502214048.786.786.2.dta   |
| SXPFKXSPFXFR 0 8 8 3 1178 | 1 | 486.2592 | 1455.756 | 3 | 48.04 | 5.70E-05 | SXPFKVSPLYFVGK | Phospho (ST) | 0.0000001000000.0 | AIC_synth_45.1292.1292.3.dta               |
| GPSGXVSAQXLR 6 8 3 1 1368 | 1 | 678.8324 | 1355.65  | 2 | 49.32 | 5.60E-05 | GPSGVYSAQAQLFK | Phospho (ST) | 0.0000001000000.0 | Synth_pep_325V.1185.1185.2.dta             |
| GPSGXVSAQXLR 0 9 9 0 199  | 1 | 724.8311 | 1447.648 | 2 | 50.87 | 5.60E-05 | GPSGAVSAQLYR   | Phospho (ST) | 0.0000001000000.0 | Synth_pep_30V_120502214048.984.984.2.dta   |
| GPSGXVSAQXLR 3 6 8 0 737  | 1 | 462.225  | 1383.653 | 3 | 43.63 | 5.60E-05 | GPSGVYSAQLVLR  | Phospho (ST) | 0.0000001000000.0 | Synth_pep_425V.981.981.3.dta               |
| SXPFKXSPFXFR 2 4 9 1 600  | 1 | 548.2568 | 1641.749 | 3 | 42.59 | 5.50E-05 | SXPFKVSPLYFVGK | Phospho (ST) | 0.0000001000000.0 | Synth_pep_375V.1033.1033.3.dta             |
| GPSGXVSAQXLR 4 5 5 1 912  | 1 | 653.8422 | 1305.67  | 2 | 49.02 | 5.50E-05 | GPSGVSLAQLLK   | Phospho (ST) | 0.0000001000000.0 | Synth_pep_275V.1352.1352.2.dta             |
| GPSGXVSAQXLR 0 5 6 1 114  | 1 | 647.8242 | 1293.634 | 2 | 49.43 | 5.50E-05 | GPSGAVSAQAQLSK | Phospho (ST) | 0.0000001000000.0 | Synth_pep_35V.945.945.2.dta                |
| GPSGXVSAQXLR 5 5 3 1 1108 | 1 | 698.8649 | 1395.715 | 2 | 47.39 | 5.40E-05 | GPSGLVSAQLFK   | Phospho (ST) | 0.0000001000000.0 | Synth_pep_325V.1495.1495.2.dta             |
| GPSGXVSAQXLR 5 8 4 1 1170 | 1 | 646.8347 | 1291.655 | 2 | 49.87 | 5.40E-05 | GPSGLVSAQLGK   | Phospho (ST) | 0.0000001000000.0 | AIC_synth_test_25.1344.1344.2.dta          |
| GPSGXVSAQXLR 5 6 5 1 1132 | 1 | 668.8475 | 1335.681 | 2 | 50.53 | 5.40E-05 | GPSGLVSAQAQLLK | Phospho (ST) | 0.0000001000000.0 | Synth_pep_275V.1147.1147.2.dta             |
| SXPFKXSPFXFR 3 0 3 1 608  | 1 | 518.2578 | 1551.752 | 3 | 43.45 | 5.40E-05 | SXPFKASPLFFGK  | Phospho (ST) | 0.0000001000000.0 | Synth_pep_40V.1192.1192.3.dta              |
| GPSGXVSAQXLR 0 9 0 0 19   | 1 | 678.8193 | 1355.624 | 2 | 46.17 | 5.40E-05 | GPSGAVSAQAQLYR | Phospho (ST) | 0.0000001000000.0 | Synth_pep_325V.887.887.2.dta               |
| GPSGXVSAQXLR 6 9 4 1 1390 | 1 | 665.8061 | 1329.598 | 2 | 51.07 | 5.40E-05 | GPSGVYSAQLGK   | Phospho (ST) | 0.0000001000000.0 | Synth_pep_375V.808.808.2.dta               |
| GPSGXVSAQXLR 5 0 8 1 1018 | 1 | 653.8412 | 1305.668 | 2 | 49.12 | 5.30E-05 | GPSGLVSAQAQLVK | Phospho (ST) | 0.0000001000000.0 | Synth_pep_30V_120502214048.1096.1096.2.dta |
| SXPFKXSPFXFR 8 9 9 1 1800 | 1 | 538.2653 | 1611.774 | 3 | 43.58 | 5.30E-05 | SXPFKVSPLYFVGK | Phospho (ST) | 0.0000001000000.0 | Synth_pep_35V.1083.1083.3.dta              |
| SXPFKXSPFXFR 4 5 5 1 912  | 1 | 490.9303 | 1469.769 | 3 | 48.33 | 5.30E-05 | SGPKFSPLFFGK   | Phospho (ST) | 0.0000001000000.0 | Synth_pep_425V.1194.1194.3.dta             |
| SXPFKXSPFXFR 1 8 5 1 372  | 1 | 505.5947 | 1513.762 | 3 | 50.51 | 5.30E-05 | SXPFKVSPLFFGK  | Phospho (ST) | 0.0000001000000.0 | Synth_pep_425V.1177.1177.3.dta             |
| GPSGXVSAQXLR 4 8 3 1 968  | 1 | 663.8259 | 1325.637 | 2 | 51.48 | 5.30E-05 | GPSGVYSAQAQLFK | Phospho (ST) | 0.0000001000000.0 | Synth_pep_30V_120502214048.1228.1228.2.dta |
| SXPFKXSPFXFR 2 0 0 0 401  | 1 | 496.2414 | 1485.702 | 3 | 50.06 | 5.10E-05 | SXPFKASPLAFLGR | Phospho (ST) | 0.0000001000000.0 | Synth_pep_375V.937.937.3.dta               |
| SXPFKXSPFXFR 0 4 2 0 85   | 1 | 491.5684 | 1471.683 | 3 | 50.12 | 5.10E-05 | SXPFKVSPLFFGK  | Phospho (ST) | 0.0000001000000.0 | Synth_pep_425V.899.899.3.dta               |
| GPSGXVSAQXLR 3 0 4 0 609  | 1 | 663.813  | 1325.611 | 2 | 48.96 | 5.10E-05 | GPSGVYSAQAQLGR | Phospho (ST) | 0.0000001000000.0 | AIC_synth_test_25.1218.1218.2.dta          |
| GPSGXVSAQXLR 1 2 3 0 247  | 1 | 721.8173 | 1441.62  | 2 | 46.36 | 5.10E-05 | GPSGDVSEAQLFR  | Phospho (ST) | 0.0000001000000.0 | Synth_pep_35V.1020.1020.2.dta              |
| SXPFKXSPFXFR 1 5 1 1 304  | 1 | 510.913  | 1529.717 | 3 | 48.86 | 5.10E-05 | SXPFKVSPLDFGK  | Phospho (ST) | 0.0000001000000.0 | AIC_synth_45.1493.1493.3.dta               |
| GPSGXVSAQXLR 0 7 8 0 157  | 1 | 661.8259 | 1321.637 | 2 | 47.29 | 5.10E-05 | GPSGAVSTAQLYR  | Phospho (ST) | 0.0000001000000.0 | Synth_pep_35V.848.848.2.dta                |
| SXPFKXSPFXFR 0 2 2 0 45   | 1 | 772.8589 | 1543.703 | 2 | 50.05 | 5.00E-05 | SXPFKVSPLFFGK  | Phospho (ST) | 0.0000001000000.0 | Synth_pep_30V_120502214048.932.932.2.dta   |
| GPSGXVSAQXLR 5 9 8 1 1198 | 1 | 699.8576 | 1397.701 | 2 | 49.98 | 5.00E-05 | GPSGLVSAQAQLVK | Phospho (ST) | 0.0000001000000.0 | Synth_pep_35V.1153.1153.2.dta              |
| GPSGXVSAQXLR 5 5 1 1 1104 | 1 | 682.8445 | 1363.675 | 2 | 50.42 | 5.00E-05 | GPSGLVSAQAQLDK | Phospho (ST) | 0.0000001000000.0 | Synth_pep_275V.1264.1264.2.dta             |
| GPSGXVSAQXLR 6 8 4 1 1370 | 1 | 633.8083 | 1265.602 | 2 | 44.32 | 5.00E-05 | GPSGVYSAQAQLGK | Phospho (ST) | 0.0000001000000.0 | Synth_pep_275V.848.848.2.dta               |
| GPSGXVSAQXLR 5 8 7 1 1176 | 1 | 668.8477 | 1335.681 | 2 | 50.88 | 5.00E-05 | GPSGLVSAQAQLTK | Phospho (ST) | 0.0000001000000.0 | Synth_pep_35V.1081.1081.2.dta              |
| SXPFKXSPFXFR 0            |   |          |          |   |       |          |                |              |                   |                                            |



|               |         |      |   |          |          |   |       |          |                |              |                   |                                            |
|---------------|---------|------|---|----------|----------|---|-------|----------|----------------|--------------|-------------------|--------------------------------------------|
| GPSGXVSAQXLR  | 9 5 3 1 | 1908 | 1 | 482.905  | 1445.693 | 3 | 51.05 | 4.20E-05 | GPSGVSAQLFK    | Phospho (ST) | 0.0000001000000.0 | Synth_pep_40V.1328.1328.3.dta              |
| SXPFKXSPXLFGR | 2 8 0 0 | 561  | 1 | 505.5841 | 1513.731 | 3 | 53    | 4.20E-05 | SEPFKXSPXLFGR  | Phospho (ST) | 0.0000001000000.0 | Synth_pep_425V.1034.1034.3.dta             |
| SXPFKXSPXLFGR | 2 9 2 1 | 586  | 1 | 536.9156 | 1607.725 | 3 | 46.73 | 4.10E-05 | SEPFKXSPXLFGR  | Phospho (ST) | 0.0000001000000.0 | Synth_pep_425V.1004.1004.3.dta             |
| GPSGXVSAQXLR  | 1 6 1 1 | 324  | 1 | 670.7929 | 1339.571 | 2 | 47.13 | 4.10E-05 | GPSGVSAQLDK    | Phospho (ST) | 0.0000001000000.0 | Synth_pep_375V.721.721.2.dta               |
| SXPFKXSPXLFGR | 0 9 9 0 | 199  | 1 | 538.2565 | 1611.748 | 3 | 47.97 | 4.10E-05 | SAPFKXSPXLFGR  | Phospho (ST) | 0.0000001000000.0 | AIC_synth_45.1260.1260.3.dta               |
| SXPFKXSPXLFGR | 8 0 8 1 | 1618 | 1 | 486.2589 | 1455.755 | 3 | 49.47 | 4.10E-05 | SAPFKXSPXLFGR  | Phospho (ST) | 0.0000001000000.0 | Synth_pep_375V.996.996.3.dta               |
| GPSGXVSAQXLR  | 0 6 9 1 | 140  | 1 | 672.8134 | 1343.612 | 2 | 55.11 | 4.10E-05 | GPSGVSAQLYK    | Phospho (ST) | 0.0000001000000.0 | Synth_pep_35V.802.802.2.dta                |
| SXPFKXSPXLFGR | 4 3 4 0 | 869  | 1 | 738.8557 | 1475.697 | 2 | 49.07 | 4.10E-05 | SGPFKXSPXLFGR  | Phospho (ST) | 0.0000001000000.0 | Synth_pep_275V.1257.1257.2.dta             |
| GPSGXVSAQXLR  | 0 5 5 0 | 111  | 1 | 450.2372 | 1347.69  | 3 | 44.02 | 4.00E-05 | GPSGAVSAQLLR   | Phospho (ST) | 0.0000001000000.0 | AIC_synth_45.1614.1614.3.dta               |
| GPSGXVSAQXLR  | 5 5 3 0 | 1107 | 1 | 712.8719 | 1423.729 | 2 | 47.16 | 4.00E-05 | GPSGLVSAQLFR   | Phospho (ST) | 0.0000001000000.0 | AIC_synth_test_25.2151.2151.2.dta          |
| GPSGXVSAQXLR  | 0 4 0 1 | 82   | 1 | 611.796  | 1221.577 | 2 | 44.01 | 4.00E-05 | GPSGVSAQQLAK   | Phospho (ST) | 0.0000001000000.0 | Synth_pep_30V_120502214048.728.728.2.dta   |
| SXPFKXSPXLFGR | 9 1 2 0 | 1825 | 1 | 541.5788 | 1621.715 | 3 | 49.03 | 4.00E-05 | SYPFKXSPXLFGR  | Phospho (ST) | 0.0000001000000.0 | Synth_pep_425V.991.991.3.dta               |
| GPSGXVSAQXLR  | 9 3 1 0 | 1863 | 1 | 738.8309 | 1475.647 | 2 | 50.1  | 4.00E-05 | GPSGVSAQLDR    | Phospho (ST) | 0.0000001000000.0 | AIC_synth_test_25.1448.1448.2.dta          |
| GPSGXVSAQXLR  | 2 8 2 0 | 565  | 1 | 704.827  | 1407.64  | 2 | 52.15 | 3.90E-05 | GPSGEVSAQLER   | Phospho (ST) | 0.0000001000000.0 | Synth_pep_35V.916.916.2.dta                |
| SXPFKXSPXLFGR | 0 0 9 0 | 19   | 1 | 507.5809 | 1519.721 | 3 | 47.88 | 3.90E-05 | SAPFKXSPXLFGR  | Phospho (ST) | 0.0000001000000.0 | Synth_pep_425V.962.962.3.dta               |
| GPSGXVSAQXLR  | 4 8 0 0 | 961  | 1 | 639.8141 | 1277.614 | 2 | 54.58 | 3.90E-05 | GPSGVSAQAQLR   | Phospho (ST) | 0.0000001000000.0 | Synth_pep_35V.889.889.2.dta                |
| GPSGXVSAQXLR  | 4 0 9 0 | 819  | 1 | 671.8101 | 1341.606 | 2 | 50.5  | 3.90E-05 | GPSGVSAQAQLR   | Phospho (ST) | 0.0000001000000.0 | Synth_pep_30V_120502214048.864.864.2.dta   |
| GPSGXVSAQXLR  | 9 3 3 0 | 1867 | 1 | 754.8492 | 1507.684 | 2 | 53.13 | 3.80E-05 | GPSGVSAQAQLR   | Phospho (ST) | 0.0000001000000.0 | Synth_pep_30V_120502214048.1448.1448.2.dta |
| GPSGXVSAQXLR  | 1 2 1 0 | 243  | 1 | 470.867  | 1409.579 | 3 | 47.87 | 3.80E-05 | GPSGDVSAQLDR   | Phospho (ST) | 0.0000001000000.0 | Synth_pep_425V.746.746.3.dta               |
| SXPFKXSPXLFGR | 6 5 3 1 | 1308 | 1 | 512.2625 | 1533.766 | 3 | 49.82 | 3.80E-05 | SEPFKXSPXLFGR  | Phospho (ST) | 0.0000001000000.0 | Synth_pep_375V.1224.1224.3.dta             |
| GPSGXVSAQXLR  | 3 4 4 1 | 690  | 1 | 642.8036 | 1283.593 | 2 | 49.57 | 3.80E-05 | GPSGVSAQAQLGK  | Phospho (ST) | 0.0000001000000.0 | Synth_pep_30V.897.897.2.dta                |
| GPSGXVSAQXLR  | 3 5 4 1 | 720  | 1 | 670.8343 | 1339.654 | 2 | 53.8  | 3.80E-05 | GPSGVSAQAQLGK  | Phospho (ST) | 0.0000001000000.0 | AIC_synth_test_25.1587.1587.2.dta          |
| GPSGXVSAQXLR  | 0 1 0 1 | 212  | 1 | 640.8    | 1279.585 | 2 | 53.69 | 3.80E-05 | GPSGVSAQAQLAK  | Phospho (ST) | 0.0000001000000.0 | AIC_synth_test_25.783.783.2.dta            |
| SXPFKXSPXLFGR | 1 5 5 1 | 312  | 1 | 510.2659 | 1527.776 | 3 | 50.51 | 3.70E-05 | SDPFKXSPXLFGR  | Phospho (ST) | 0.0000001000000.0 | Synth_pep_425V.1293.1293.3.dta             |
| SXPFKXSPXLFGR | 0 2 0 2 | 45   | 1 | 772.8608 | 1543.707 | 2 | 52.43 | 3.70E-05 | SAPFKXSPXLFGR  | Phospho (ST) | 0.0000001000000.0 | Synth_pep_275V.961.961.2.dta               |
| SXPFKXSPXLFGR | 4 3 0 0 | 861  | 1 | 497.5773 | 1489.71  | 3 | 48.34 | 3.70E-05 | SEPFKXSPXLFGR  | Phospho (ST) | 0.0000001000000.0 | Synth_pep_40V.1128.1128.3.dta              |
| GPSGXVSAQXLR  | 8 2 3 0 | 1647 | 1 | 713.8397 | 1425.665 | 2 | 49.73 | 3.70E-05 | GPSGVSAQAQLFR  | Phospho (ST) | 0.0000001000000.0 | Synth_pep_35V.1114.1114.2.dta              |
| GPSGXVSAQXLR  | 8 4 4 0 | 1689 | 1 | 632.8049 | 1263.595 | 2 | 53.46 | 3.70E-05 | GPSGVSAQAQLGR  | Phospho (ST) | 0.0000001000000.0 | Synth_pep_30V_120502214048.802.802.2.dta   |
| GPSGXVSAQXLR  | 0 5 1 0 | 103  | 1 | 450.8848 | 1349.633 | 3 | 50.29 | 3.70E-05 | GPSGAVSAQLDR   | Phospho (ST) | 0.0000001000000.0 | Synth_pep_425V.940.940.3.dta               |
| GPSGXVSAQXLR  | 6 0 1 1 | 1204 | 1 | 648.7968 | 1295.579 | 2 | 50.75 | 3.70E-05 | GPSGVSAQAQLDK  | Phospho (ST) | 0.0000001000000.0 | Synth_pep_275V.744.744.2.dta               |
| SXPFKXSPXLFGR | 6 6 0 1 | 1322 | 1 | 478.2335 | 1431.679 | 3 | 51.63 | 3.60E-05 | SEPFKXSPXLFGR  | Phospho (ST) | 0.0000001000000.0 | Synth_pep_40V.867.867.3.dta                |
| GPSGXVSAQXLR  | 0 8 3 1 | 168  | 1 | 670.8343 | 1339.654 | 2 | 54.02 | 3.60E-05 | GPSGAVSAQAQLFK | Phospho (ST) | 0.0000001000000.0 | Synth_pep_325V.1207.1207.2.dta             |
| GPSGXVSAQXLR  | 0 0 4 0 | 9    | 1 | 625.798  | 1249.581 | 2 | 51.44 | 3.60E-05 | GPSGVSAQAQLGR  | Phospho (ST) | 0.0000001000000.0 | Synth_pep_325V.776.776.2.dta               |
| SXPFKXSPXLFGR | 1 5 9 1 | 320  | 1 | 526.9261 | 1577.757 | 3 | 51.14 | 3.60E-05 | SDPFKXSPXLFGR  | Phospho (ST) | 0.0000001000000.0 | Synth_pep_375V.1177.1177.3.dta             |
| SXPFKXSPXLFGR | 4 4 9 1 | 900  | 1 | 488.9019 | 1463.684 | 3 | 53.62 | 3.60E-05 | SGPFKXSPXLFGR  | Phospho (ST) | 0.0000001000000.0 | Synth_pep_375V.933.933.3.dta               |
| GPSGXVSAQXLR  | 6 4 9 0 | 1299 | 1 | 679.8061 | 1357.598 | 2 | 52.41 | 3.60E-05 | GPSGVSAQAQLYR  | Phospho (ST) | 0.0000001000000.0 | Synth_pep_275V.817.817.2.dta               |
| SXPFKXSPXLFGR | 4 5 4 1 | 910  | 1 | 472.2423 | 1413.705 | 3 | 50.75 | 3.50E-05 | SGPFKXSPXLFGR  | Phospho (ST) | 0.0000001000000.0 | Synth_pep_40V.1076.1076.3.dta              |
| SXPFKXSPXLFGR | 5 9 5 1 | 1192 | 1 | 526.2792 | 1575.816 | 3 | 44.59 | 3.50E-05 | SLPFKXSPXLFGR  | Phospho (ST) | 0.0000001000000.0 | AIC_synth_45.1526.1526.3.dta               |
| GPSGXVSAQXLR  | 5 3 8 1 | 1078 | 1 | 691.8582 | 1381.702 | 2 | 51.88 | 3.50E-05 | GPSGLVSAQAQLK  | Phospho (ST) | 0.0000001000000.0 | Synth_pep_275V.1440.1440.2.dta             |
| GPSGXVSAQXLR  | 6 8 3 1 | 1368 | 1 | 678.8322 | 1355.65  | 2 | 52.28 | 3.50E-05 | GPSGVSAQAQLFK  | Phospho (ST) | 0.0000001000000.0 | Synth_pep_35V.1162.1162.2.dta              |
| SXPFKXSPXLFGR | 8 3 1 0 | 1663 | 1 | 526.2559 | 1575.746 | 3 | 49.28 | 3.50E-05 | SVPFKXSPXLFGR  | Phospho (ST) | 0.0000001000000.0 | Synth_pep_425V.1201.1201.3.dta             |
| GPSGXVSAQXLR  | 5 6 5 1 | 1132 | 1 | 668.8478 | 1335.681 | 2 | 52.41 | 3.50E-05 | GPSGVSAQAQLLK  | Phospho (ST) | 0.0000001000000.0 | AIC_synth_test_25.1404.1404.2.dta          |
| GPSGXVSAQXLR  | 6 1 6 1 | 1234 | 1 | 656.7921 | 1311.57  | 2 | 48.32 | 3.50E-05 | GPSGVSAQAQLSK  | Phospho (ST) | 0.0000001000000.0 | Synth_pep_35V.715.715.2.dta                |
| SXPFKXSPXLFGR | 8 0 2 0 | 1605 | 1 | 505.5845 | 1513.732 | 3 | 53.81 | 3.50E-05 | SVPFKXSPXLFGR  | Phospho (ST) | 0.0000001000000.0 | Synth_pep_425V.970.970.3.dta               |
| GPSGXVSAQXLR  | 2 4 9 1 | 500  | 1 | 686.8107 | 1371.607 | 2 | 52.98 | 3.50E-05 | GPSGVSAQAQLYK  | Phospho (ST) | 0.0000001000000.0 | Synth_pep_325V.799.799.2.dta               |
| GPSGXVSAQXLR  | 3 5 3 1 | 708  | 1 | 715.8574 | 1429.7   | 2 | 52.15 | 3.50E-05 | GPSGVSAQAQLFK  | Phospho (ST) | 0.0000001000000.0 | Synth_pep_325V.1503.1503.2.dta             |
| GPSGXVSAQXLR  | 5 8 8 0 | 1177 | 1 | 454.9097 | 1361.707 | 3 | 44.94 | 3.40E-05 | GPSGLVSAQAQLVR | Phospho (ST) | 0.0000001000000.0 | AIC_synth_45.1511.1511.3.dta               |
| SXPFKXSPXLFGR | 6 5 9 1 | 1320 | 1 | 517.5937 | 1549.759 | 3 | 50.95 | 3.40E-05 | SEPFKXSPXLFGR  | Phospho (ST) | 0.0000001000000.0 | Synth_pep_425V.1123.1123.3.dta             |
| GPSGXVSAQXLR  | 2 8 5 0 | 571  | 1 | 696.8481 | 1391.682 | 2 | 52.06 | 3.40E-05 | GPSGEVSAQAQLR  | Phospho (ST) | 0.0000001000000.0 | Synth_pep_325V.1201.1201.2.dta             |
| SXPFKXSPXLFGR | 4 0 0 0 | 801  | 1 | 472.2337 | 1413.679 | 3 | 53.32 | 3.40E-05 | SGPFKXSPXLFGR  | Phospho (ST) | 0.0000001000000.0 | Synth_pep_425V.921.921.3.dta               |
| GPSGXVSAQXLR  | 9 8 3 1 | 1968 | 1 | 716.8479 | 1431.681 | 2 | 52.83 | 3.40E-05 | GPSGVSAQAQLFK  | Phospho (ST) | 0.0000001000000.0 | Synth_pep_275V.1402.1402.2.dta             |
| SXPFKXSPXLFGR | 2 5 0 0 | 501  | 1 | 510.2567 | 1527.748 | 3 | 50.98 | 3.40E-05 | SEPFKXSPXLFGR  | Phospho (ST) | 0.0000001000000.0 | Synth_pep_425V.1114.1114.3.dta             |
| SXPFKXSPXLFGR | 2 6 2 0 | 525  | 1 | 780.858  | 1559.702 | 2 | 51.62 | 3.40E-05 | SEPFKXSPXLFGR  | Phospho (ST) | 0.0000001000000.0 | Synth_pep_275V.954.954.2.dta               |
| SXPFKXSPXLFGR | 3 3 0 0 | 661  | 1 | 527.5918 | 1579.754 | 3 | 45.64 | 3.40E-05 | SEPFKXSPXLFGR  | Phospho (ST) | 0.0000001000000.0 | AIC_synth_45.1684.1684.3.dta               |
| SXPFKXSPXLFGR | 4 8 4 1 | 970  | 1 | 467.5704 | 1399.69  | 3 | 51.44 | 3.40E-05 | SGPFKXSPXLFGR  | Phospho (ST) | 0.0000001000000.0 | Synth_pep_40V.995.995.3.dta                |
| GPSGXVSAQXLR  | 8 8 8 1 | 1778 | 1 | 660.8515 | 1319.689 | 2 | 49.84 | 3.40E-05 | GPSGVSAQAQLVK  | Phospho (ST) | 0.0000001000000.0 | Synth_pep_35V.1099.1099.2.dta              |
| GPSGXVSAQXLR  | 1 8 6 1 | 374  | 1 | 442.2099 | 1323.608 | 3 | 49.93 | 3.40E-05 | GPSGDVSAQAQLSK | Phospho (ST) | 0.0000001000000.0 | Synth_pep_425V.820.820.3.dta               |
| GPSGXVSAQXLR  | 1 9 7 0 | 395  | 1 | 715.8179 | 1429.621 | 2 | 53.24 | 3.30E-05 | GPSGDVSAQAQLTR | Phospho (ST) | 0.0000001000000.0 | Synth_pep_35V.897.897.2.dta                |
| SXPFKXSPXLFGR | 4 2 0 0 | 841  | 1 | 491.5688 | 1471.685 | 3 | 52.04 | 3.30E-05 | SGPFKXSPXLFGR  | Phospho (ST) | 0.0000001000000.0 | Synth_pep_375V.914.914.3.dta               |
| GPSGXVSAQXLR  | 4 8 4 0 | 969  | 1 | 632.8073 | 1263.6   | 2 | 53.93 | 3.30E-05 | GPSGVSAQAQLGR  | Phospho (ST) | 0.0000001000000.0 | AIC_synth_test_25.995.995.2.dta            |
| GPSGXVSAQXLR  | 0 1 9 0 | 39   | 1 | 700.8124 | 1399.61  | 2 | 51.45 | 3.30E-05 | GPSGVSAQAQLYR  | Phospho (ST) | 0.0000001000000.0 | Synth_pep_30V_120502214048.849.849.2.dta   |
| GPSGXVSAQXLR  | 3 9 9 0 | 799  | 1 | 762.8467 | 1523.679 | 2 | 55.86 | 3.30E-05 | GPSGVSAQAQLYK  | Phospho (ST) | 0.0000001000000.0 | Synth_pep_30V_120502214048.1208.1208.2.dta |
| GPSGXVSAQXLR  | 3 8 4 0 | 769  | 1 | 677.8293 | 1353.644 | 2 | 51.67 | 3.30E-05 | GPSGVSAQAQLGR  | Phospho (ST) | 0.0000001000000.0 | AIC_synth_test_25.1427.1427.2.dta          |
| GPSGXVSAQXLR  | 3 4 0 1 | 682  | 1 | 649.8108 | 1297.607 | 2 | 53.04 | 3.30E-05 | GPSGVSAQAQLAK  | Phospho (ST) | 0.0000001000000.0 | Synth_pep_325V.903.903.2.dta               |
| GPSGXVSAQXLR  | 5 0 5 0 | 1011 | 1 | 450.2372 | 1347.69  | 3 | 44.89 | 3.20E-05 | GPSGLVSAQAQLR  | Phospho (ST) | 0.0000001000000.0 | Synth_pep_425V.1171.1171.3.dta             |
| GPSGXVSAQXLR  | 9 8 5 0 | 1971 | 1 | 713.8601 | 1425.706 | 2 | 48.13 | 3.20E-05 | GPSGVSAQAQLLR  | Phospho (ST) | 0.0000001000000.0 | AIC_synth_test_25.1703.1703.2.dta          |
| SXPFKXSPXLFGR | 0 6 0 1 | 122  | 1 | 472.9023 | 1415.685 | 3 | 54.11 | 3.20E-05 | SAPFKXSPXLFGR  | Phospho (ST) | 0.0000001000000.0 | AIC_synth_45.964.964.3.dta                 |
| SXPFKXSPXLFGR | 2 2 2 0 | 445  | 1 | 534.9111 | 1601.712 | 3 | 48.23 | 3.20E-05 | SEPFKXSPXLFGR  | Phospho (ST) | 0.0000001000000.0 | AIC_synth_45.1056.1056.3.dta               |
| GPSGXVSAQXLR  | 8 5 1 1 | 1704 | 1 | 675.8375 | 1349.661 | 2 | 52.8  | 3.20E-05 | GPSGVSAQAQLDK  | Phospho (ST) | 0.0000001000000.0 | Synth_pep_275V.1142.1142.2.dta             |
| GPSGXVSAQXLR  | 5 0 8 1 | 1018 | 1 | 653.844  | 1305.673 | 2 | 51.44 | 3.10E-05 | GPSGLVSAQAQLVK | Phospho (ST) | 0.0000001000000.0 | Synth_pep_325V.1072.1072.2.dta             |
| GPSGXVSAQXLR  | 5 8 3 0 | 1167 | 1 | 470.9101 | 1409.708 | 3 | 45.92 | 3.10E-05 | GPSGLVSAQAQLFR | Phospho (ST) | 0.0000001000000.0 | AIC_synth_45.1812.1812.3.dta               |
| GPSGXVSAQXLR  | 3 3 5 1 | 672  | 1 | 477.5743 | 1429.701 | 3 | 53.19 | 3.10E-05 | GPSGVSAQAQLLK  | Phospho (ST) | 0.0000001000000.0 | Synth_pep_425V.1387.1387.3.dta             |
| SXPFKXSPXLFGR | 2 2 9 1 | 460  | 1 | 536.9161 | 1607.727 | 3 | 48.35 | 3.10E-05 | SEPFKXSPXLFGR  | Phospho (ST) | 0.0000001000000.0 | AIC_synth_45.1078.1078.3.dta               |
| GPSGXVSAQXLR  | 3 0 5 0 | 611  | 1 | 461.5658 | 1381.676 |   |       |          |                |              |                   |                                            |

|                            |   |          |          |   |       |          |               |              |                   |                                            |
|----------------------------|---|----------|----------|---|-------|----------|---------------|--------------|-------------------|--------------------------------------------|
| GPSGXVSAQQLXR 0 4 7 0 95   | 1 | 640.8018 | 1279.589 | 2 | 52.9  | 2.70E-05 | GPSGAVSAQQLTR | Phospho (ST) | 0.0000001000000.0 | Synth_pep_275V.760.760.2.dta               |
| GPSGXVSAQQLXR 5 0 7 0 1015 | 1 | 668.8325 | 1335.65  | 2 | 51.52 | 2.70E-05 | GPSGLVSAQQLTR | Phospho (ST) | 0.0000001000000.0 | Synth_pep_325V.991.991.2.dta               |
| GPSGXVSAQQLXR 5 8 5 1 1172 | 1 | 674.8652 | 1347.716 | 2 | 50.69 | 2.60E-05 | GPSGLVSAQQLL  | Phospho (ST) | 0.0000001000000.0 | Synth_pep_30V_120502214048.1393.1393.2.dta |
| GPSGXVSAQQLXR 9 8 5 0 1971 | 1 | 713.8587 | 1425.703 | 2 | 49.09 | 2.60E-05 | GPSGVVSAQQLL  | Phospho (ST) | 0.0000001000000.0 | Synth_pep_275V.1361.1361.2.dta             |
| SXPFKXSPXLFGR 6 9 9 1 1400 | 1 | 534.2535 | 1599.739 | 3 | 51.81 | 2.60E-05 | SPFKXSPLYFGK  | Phospho (ST) | 0.0000001000000.0 | Synth_pep_375V.1032.1032.3.dta             |
| GPSGXVSAQQLXR 5 5 0 1 1102 | 1 | 660.8508 | 1319.687 | 2 | 51.04 | 2.60E-05 | GPSGLVSAQQLAK | Phospho (ST) | 0.0000001000000.0 | Synth_pep_325V.1256.1256.2.dta             |
| GPSGXVSAQQLXR 0 4 0 9 99   | 1 | 671.8131 | 1341.612 | 2 | 48.33 | 2.60E-05 | GPSGAVSAQQLYR | Phospho (ST) | 0.0000001000000.0 | AIC_synth_test_25.927.927.2.dta            |
| GPSGXVSAQQLXR 1 5 6 0 1033 | 1 | 683.8217 | 1365.629 | 2 | 52.4  | 2.60E-05 | GPSGLVSDAQLSR | Phospho (ST) | 0.0000001000000.0 | Synth_pep_375V.896.896.2.dta               |
| GPSGXVSAQQLXR 4 8 3 1 968  | 1 | 663.8265 | 1325.639 | 2 | 54.64 | 2.60E-05 | GPSGGVSAQLFK  | Phospho (ST) | 0.0000001000000.0 | Synth_pep_275V.1285.1285.2.dta             |
| SXPFKXSPXLFGR 5 8 1 0 1163 | 1 | 514.9288 | 1541.765 | 3 | 52.71 | 2.50E-05 | SLPFKXSPDFGR  | Phospho (ST) | 0.0000001000000.0 | AIC_synth_45.1496.1496.3.dta               |
| SXPFKXSPXLFGR 4 6 9 1 940  | 1 | 498.9064 | 1493.697 | 3 | 55.5  | 2.50E-05 | SGPFKXSPLYFGK | Phospho (ST) | 0.0000001000000.0 | Synth_pep_40V.906.906.3.dta                |
| GPSGXVSAQQLXR 0 1 4 0 29   | 1 | 647.7927 | 1293.571 | 2 | 56.84 | 2.50E-05 | GPSGAVSAQQLGR | Phospho (ST) | 0.0000001000000.0 | Synth_pep_35V.752.752.2.dta                |
| SXPFKXSPXLFGR 0 0 9 1 20   | 1 | 498.2462 | 1491.717 | 3 | 54.26 | 2.50E-05 | SAPFKASPLYFGK | Phospho (ST) | 0.0000001000000.0 | Synth_pep_35V.962.962.3.dta                |
| GPSGXVSAQQLXR 2 8 2 0 565  | 1 | 704.8269 | 1407.639 | 2 | 53.97 | 2.50E-05 | GPSGEVSAQLER  | Phospho (ST) | 0.0000001000000.0 | Synth_pep_325V.920.920.2.dta               |
| GPSGXVSAQQLXR 5 8 3 1 1168 | 1 | 691.8584 | 1381.702 | 2 | 51.67 | 2.50E-05 | GPSGLVSAQLFK  | Phospho (ST) | 0.0000001000000.0 | Synth_pep_275V.1512.1512.2.dta             |
| GPSGXVSAQQLXR 4 8 5 1 972  | 1 | 646.8337 | 1291.653 | 2 | 53.19 | 2.50E-05 | GPSGGVSAQLL   | Phospho (ST) | 0.0000001000000.0 | Synth_pep_30V_120502214048.1171.1171.2.dta |
| SXPFKXSPXLFGR 6 5 2 0 1305 | 1 | 515.5886 | 1543.744 | 3 | 53.5  | 2.50E-05 | SPFKXSPLEFGR  | Phospho (ST) | 0.0000001000000.0 | AIC_synth_45.1396.1396.3.dta               |
| SXPFKXSPXLFGR 4 4 4 1 890  | 1 | 453.5547 | 1357.642 | 3 | 52.95 | 2.50E-05 | SGPFKXSPLEFGR | Phospho (ST) | 0.0000001000000.0 | Synth_pep_40V.865.865.3.dta                |
| GPSGXVSAQQLXR 6 6 6 1 1334 | 1 | 642.7972 | 1283.58  | 2 | 57.33 | 2.50E-05 | GPSGVSSAQLSK  | Phospho (ST) | 0.0000001000000.0 | Synth_pep_325V.706.706.2.dta               |
| GPSGXVSAQQLXR 1 9 9 0 399  | 1 | 746.8257 | 1491.637 | 2 | 51.4  | 2.50E-05 | GPSGDVSAQQLYR | Phospho (ST) | 0.0000001000000.0 | Synth_pep_325V.956.956.2.dta               |
| SXPFKXSPXLFGR 4 8 5 1 972  | 1 | 486.2592 | 1455.756 | 3 | 51.53 | 2.50E-05 | SGPFKXSPLEFGR | Phospho (ST) | 0.0000001000000.0 | AIC_synth_45.1413.1413.3.dta               |
| GPSGXVSAQQLXR 3 8 2 0 765  | 1 | 713.8401 | 1425.666 | 2 | 51.37 | 2.50E-05 | GPSGFVSAQLER  | Phospho (ST) | 0.0000001000000.0 | Synth_pep_275V.1184.1184.2.dta             |
| SXPFKXSPXLFGR 2 1 6 0 433  | 1 | 691.7992 | 1381.584 | 2 | 51.37 | 2.40E-05 | GPSGLVSDAQLSR | Phospho (ST) | 0.0000001000000.0 | Synth_pep_35V.739.739.2.dta                |
| GPSGXVSAQQLXR 5 9 8 0 1197 | 1 | 713.8586 | 1425.703 | 2 | 49.41 | 2.40E-05 | GPSGLVSAQQLYR | Phospho (ST) | 0.0000001000000.0 | Synth_pep_35V.1184.1184.2.dta              |
| GPSGXVSAQQLXR 4 4 4 1 890  | 1 | 597.7797 | 1193.545 | 2 | 49.5  | 2.40E-05 | GPSGGVSAQLGK  | Phospho (ST) | 0.0000001000000.0 | Synth_pep_30V_120502214048.723.723.2.dta   |
| GPSGXVSAQQLXR 4 5 3 1 908  | 1 | 670.8345 | 1339.654 | 2 | 55.79 | 2.40E-05 | GPSGGVSAQLFK  | Phospho (ST) | 0.0000001000000.0 | Synth_pep_275V.1417.1417.2.dta             |
| GPSGXVSAQQLXR 2 2 8 0 457  | 1 | 470.2202 | 1407.639 | 3 | 54.45 | 2.30E-05 | GPSGVEAQLVR   | Phospho (ST) | 0.0000001000000.0 | Synth_pep_425V.836.836.3.dta               |
| GPSGXVSAQQLXR 5 5 0 1 1102 | 1 | 660.8503 | 1319.686 | 2 | 51.58 | 2.30E-05 | GPSGLVSAQQLAK | Phospho (ST) | 0.0000001000000.0 | Synth_pep_275V.1321.1321.2.dta             |
| SXPFKXSPXLFGR 4 2 9 0 859  | 1 | 522.2438 | 1563.71  | 3 | 54.07 | 2.30E-05 | SGPFKXSPLYFGK | Phospho (ST) | 0.0000001000000.0 | Synth_pep_40V.944.944.3.dta                |
| GPSGXVSAQQLXR 6 8 3 1 1368 | 1 | 678.8309 | 1355.647 | 2 | 54.14 | 2.30E-05 | GPSGGVSAQLFK  | Phospho (ST) | 0.0000001000000.0 | Synth_pep_30V_120502214048.1209.1209.2.dta |
| GPSGXVSAQQLXR 2 2 0 0 441  | 1 | 690.8116 | 1379.609 | 2 | 52.98 | 2.30E-05 | GPSGVEAQLAR   | Phospho (ST) | 0.0000001000000.0 | Synth_pep_375V.769.769.2.dta               |
| SXPFKXSPXLFGR 4 9 9 0 999  | 1 | 533.5848 | 1597.733 | 3 | 49.29 | 2.30E-05 | SGPFKXSPLYFGR | Phospho (ST) | 0.0000001000000.0 | AIC_synth_45.1276.1276.3.dta               |
| SXPFKXSPXLFGR 9 3 1 0 1863 | 1 | 547.5875 | 1639.741 | 3 | 49.88 | 2.30E-05 | SPFKXSPDFGR   | Phospho (ST) | 0.0000001000000.0 | Synth_pep_425V.1211.1211.3.dta             |
| SXPFKXSPXLFGR 0 2 9 1 60   | 1 | 517.5801 | 1549.718 | 3 | 54.12 | 2.30E-05 | SAPFKESPLYFGK | Phospho (ST) | 0.0000001000000.0 | Synth_pep_425V.925.925.3.dta               |
| GPSGXVSAQQLXR 4 9 8 0 997  | 1 | 685.8268 | 1369.639 | 2 | 48.95 | 2.30E-05 | GPSGGVSAQQLYR | Phospho (ST) | 0.0000001000000.0 | Synth_pep_35V.970.970.2.dta                |
| GPSGXVSAQQLXR 2 6 1 1 524  | 1 | 677.7975 | 1353.58  | 2 | 51.54 | 2.30E-05 | GPSGVSSAQLDK  | Phospho (ST) | 0.0000001000000.0 | Synth_pep_325V.722.722.2.dta               |
| SXPFKXSPXLFGR 3 0 5 0 611  | 1 | 516.2659 | 1545.776 | 3 | 46.39 | 2.30E-05 | SFPFKASPLDFGR | Phospho (ST) | 0.0000001000000.0 | AIC_synth_45.1518.1518.3.dta               |
| GPSGXVSAQQLXR 5 5 5 0 1111 | 1 | 464.2526 | 1389.736 | 3 | 48.22 | 2.20E-05 | GPSGLVSAQLLR  | Phospho (ST) | 0.0000001000000.0 | AIC_synth_40V.1408.1408.3.dta              |
| GPSGXVSAQQLXR 5 3 5 0 1071 | 1 | 475.5826 | 1423.726 | 3 | 46.6  | 2.20E-05 | GPSGLVSAQLLR  | Phospho (ST) | 0.0000001000000.0 | AIC_synth_45.1876.1876.3.dta               |
| GPSGXVSAQQLXR 5 0 9 0 1019 | 1 | 699.8423 | 1397.67  | 2 | 53.2  | 2.20E-05 | GPSGLVSAQQLYR | Phospho (ST) | 0.0000001000000.0 | Synth_pep_325V.1145.1145.2.dta             |
| SXPFKXSPXLFGR 8 2 8 0 1657 | 1 | 514.9284 | 1541.765 | 3 | 53.4  | 2.20E-05 | SVPFKESPLYFGR | Phospho (ST) | 0.0000001000000.0 | Synth_pep_425V.1086.1086.3.dta             |
| SXPFKXSPXLFGR 2 2 9 1 460  | 1 | 536.9152 | 1607.724 | 3 | 49.39 | 2.20E-05 | SEPFKESPLYFGK | Phospho (ST) | 0.0000001000000.0 | Synth_pep_425V.931.931.3.dta               |
| GPSGXVSAQQLXR 0 4 0 1 82   | 1 | 611.7952 | 1221.576 | 2 | 50.5  | 2.20E-05 | GPSGAVSAQQLAK | Phospho (ST) | 0.0000001000000.0 | Synth_pep_325V.729.729.2.dta               |
| SXPFKXSPXLFGR 4 9 3 1 988  | 1 | 518.9176 | 1553.731 | 3 | 52.47 | 2.20E-05 | SGPFKXSPLEFGR | Phospho (ST) | 0.0000001000000.0 | AIC_synth_45.1415.1415.3.dta               |
| SXPFKXSPXLFGR 6 6 0 1 1322 | 1 | 478.2323 | 1431.677 | 3 | 53.71 | 2.20E-05 | SGPFKXSPLEFGR | Phospho (ST) | 0.0000001000000.0 | Synth_pep_425V.873.873.3.dta               |
| SXPFKXSPXLFGR 2 8 9 0 579  | 1 | 536.2609 | 1605.761 | 3 | 53.33 | 2.20E-05 | SEPFKXSPLYFGR | Phospho (ST) | 0.0000001000000.0 | AIC_synth_45.1326.1326.3.dta               |
| GPSGXVSAQQLXR 4 8 5 1 972  | 1 | 646.8348 | 1291.655 | 2 | 53.71 | 2.20E-05 | GPSGGVSAQQLL  | Phospho (ST) | 0.0000001000000.0 | Synth_pep_325V.1137.1137.2.dta             |
| GPSGXVSAQQLXR 9 5 3 0 1907 | 1 | 737.8566 | 1473.699 | 2 | 53.31 | 2.20E-05 | GPSGVVSAQLFR  | Phospho (ST) | 0.0000001000000.0 | Synth_pep_30V_120502214048.1433.1433.2.dta |
| GPSGXVSAQQLXR 0 0 5 1 12   | 1 | 639.8272 | 1277.64  | 2 | 50.93 | 2.20E-05 | GPSGAVSAQQLL  | Phospho (ST) | 0.0000001000000.0 | Synth_pep_35V.1034.1034.2.dta              |
| GPSGXVSAQQLXR 5 0 4 0 1009 | 1 | 646.8184 | 1291.622 | 2 | 53.7  | 2.20E-05 | GPSGLVSAQQLGR | Phospho (ST) | 0.0000001000000.0 | Synth_pep_275V.1008.1008.2.dta             |
| SXPFKXSPXLFGR 9 8 9 1 1980 | 1 | 538.2668 | 1611.779 | 3 | 46.79 | 2.20E-05 | SVPFKESPLYFGK | Phospho (ST) | 0.0000001000000.0 | AIC_synth_45.1380.1380.3.dta               |
| GPSGXVSAQQLXR 0 4 1 1 84   | 1 | 633.7916 | 1265.569 | 2 | 57.32 | 2.20E-05 | GPSGAVSAQQLDK | Phospho (ST) | 0.0000001000000.0 | Synth_pep_325V.727.727.2.dta               |
| SXPFKXSPXLFGR 1 3 1 1 264  | 1 | 522.2412 | 1563.702 | 3 | 51.62 | 2.20E-05 | SDFPKXSPDFGR  | Phospho (ST) | 0.0000001000000.0 | Synth_pep_425V.1203.1203.3.dta             |
| GPSGXVSAQQLXR 6 9 4 0 1389 | 1 | 679.8087 | 1357.603 | 2 | 50.83 | 2.20E-05 | GPSGVVSAQQLGR | Phospho (ST) | 0.0000001000000.0 | Synth_pep_375V.826.826.2.dta               |
| GPSGXVSAQQLXR 5 0 8 1 1018 | 1 | 653.8427 | 1305.671 | 2 | 53.11 | 2.10E-05 | GPSGLVSAQQLVK | Phospho (ST) | 0.0000001000000.0 | AIC_synth_test_25.1377.1377.2.dta          |
| GPSGXVSAQQLXR 0 5 8 0 117  | 1 | 667.8458 | 1333.677 | 2 | 49.69 | 2.10E-05 | GPSGAVSAQQLYR | Phospho (ST) | 0.0000001000000.0 | Synth_pep_375V.1126.1126.2.dta             |
| SXPFKXSPXLFGR 1 8 1 0 363  | 1 | 515.5755 | 1543.705 | 3 | 54.85 | 2.10E-05 | SDPFKXSPDFGR  | Phospho (ST) | 0.0000001000000.0 | Synth_pep_425V.1107.1107.3.dta             |
| SXPFKXSPXLFGR 4 4 0 0 881  | 1 | 467.5627 | 1399.666 | 3 | 56.27 | 2.10E-05 | SGPFKXSPLEFGR | Phospho (ST) | 0.0000001000000.0 | AIC_synth_45.1013.1013.3.dta               |
| GPSGXVSAQQLXR 8 8 2 0 1765 | 1 | 689.8401 | 1377.666 | 2 | 52.05 | 2.10E-05 | GPSGVVSAQLER  | Phospho (ST) | 0.0000001000000.0 | Synth_pep_275V.1045.1045.2.dta             |
| SXPFKXSPXLFGR 5 8 9 1 1180 | 1 | 521.6055 | 1561.795 | 3 | 49.77 | 2.10E-05 | SLPFKXSPLYFGK | Phospho (ST) | 0.0000001000000.0 | Synth_pep_35V.1176.1176.3.dta              |
| GPSGXVSAQQLXR 5 6 3 0 1127 | 1 | 699.8421 | 1397.67  | 2 | 53.41 | 2.10E-05 | GPSGLVSAQQLFR | Phospho (ST) | 0.0000001000000.0 | Synth_pep_30V_120502214048.1113.1113.2.dta |
| SXPFKXSPXLFGR 1 3 1 0 263  | 1 | 531.5756 | 1591.706 | 3 | 51.53 | 2.10E-05 | SDPFKXSPDFGR  | Phospho (ST) | 0.0000001000000.0 | Synth_pep_425V.1222.1222.3.dta             |
| GPSGXVSAQQLXR 3 5 2 0 705  | 1 | 720.8477 | 1439.681 | 2 | 51.58 | 2.10E-05 | GPSGLVSAQQLER | Phospho (ST) | 0.0000001000000.0 | Synth_pep_275V.1313.1313.2.dta             |
| GPSGXVSAQQLXR 2 9 9 0 599  | 1 | 753.833  | 1505.652 | 2 | 47.67 | 2.10E-05 | GPSGDVSAQQLYR | Phospho (ST) | 0.0000001000000.0 | Synth_pep_30V_120502214048.976.976.2.dta   |
| SXPFKXSPXLFGR 5 3 1 1 1064 | 1 | 521.5938 | 1561.759 | 3 | 52.81 | 2.10E-05 | SLPFKXSPDFGR  | Phospho (ST) | 0.0000001000000.0 | Synth_pep_425V.1249.1249.3.dta             |
| GPSGXVSAQQLXR 5 3 8 0 1077 | 1 | 705.8608 | 1409.707 | 2 | 47.68 | 2.00E-05 | GPSGLVSAQQLVR | Phospho (ST) | 0.0000001000000.0 | Synth_pep_275V.1456.1456.2.dta             |
| SXPFKXSPXLFGR 0 6 0 1 122  | 1 | 472.9028 | 1415.687 | 3 | 56.65 | 2.00E-05 | SAPFKXSPLEFGR | Phospho (ST) | 0.0000001000000.0 | Synth_pep_425V.865.865.3.dta               |
| SXPFKXSPXLFGR 4 0 0 0 801  | 1 | 472.2339 | 1413.68  | 3 | 55.54 | 2.00E-05 | SGPFKXSPLEFGR | Phospho (ST) | 0.0000001000000.0 | Synth_pep_40V.919.919.3.dta                |
| SXPFKXSPXLFGR 4 2 9 0 859  | 1 | 522.2437 | 1563.709 | 3 | 54.71 | 2.00E-05 | SEPFKESPLYFGR | Phospho (ST) | 0.0000001000000.0 | Synth_pep_425V.946.946.3.dta               |
| SXPFKXSPXLFGR 2 2 1 0 443  | 1 | 530.239  | 1587.695 | 3 | 50.98 | 2.00E-05 | SEPFKESPLDFGR | Phospho (ST) | 0.0000001000000.0 | Synth_pep_40V.938.938.3.dta                |
| SXPFKXSPXLFGR 4 9 3 1 988  | 1 | 518.9178 | 1553.732 | 3 | 53.51 | 2.00E-05 | SGPFKXSPLEFGR | Phospho (ST) | 0.0000001000000.0 | Synth_pep_425V.1115.1115.3.dta             |
| GPSGXVSAQQLXR 1 2 2 0 245  | 1 | 475.5395 | 1423.597 | 3 | 54.22 | 2.00E-05 | GPSGDVSAQLER  | Phospho (ST) | 0.0000001000000.0 | Synth_pep_425V.754.754.3.dta               |
| SXPFKXSPXLFGR 2 9 9 0 599  | 1 | 557.5914 | 1669.752 | 3 | 47.24 | 2.00E-05 | SEPFKXSPLYFGR | Phospho (ST) | 0.0000001000000.0 | Synth_pep_425V.1049.1049.3.dta             |
| SXPFKXSPXLFGR 9 9 1 0 1983 | 1 | 552.9193 | 1655.736 | 3 | 50.8  | 2.00E-05 | SDPFKXSPDFGR  | Phospho (ST) | 0.0000001000000.0 | AIC_synth_45.1354.1354.3.dta               |
| GPSGXVSAQQLXR 5 0 4 1 1010 | 1 | 632.8184 | 1263.622 | 2 | 51.07 | 2.00E-05 | GPSGLVSAQQLGK | Phospho (ST) | 0.0000001000000.0 | Synth_pep_275V.977.977.2.dta               |
| GPSGXVSAQQLXR 3 5 9 0 719  | 1 | 737.8572 | 1473.7   | 2 | 53.76 | 2.00E-05 | GPSGFVSAQLFR  | Phospho (ST) | 0.0000001000000.0 | Synth_pep_30V_120502214048.1344.1344.2.dta |
| SXPFKXSPXLFGR 4 6 5 2 932  | 1 | 482.2463 | 1443.717 | 3 | 55.07 | 2.00E-05 |               |              |                   |                                            |

|                           |   |          |          |   |       |          |                |              |                   |                                            |
|---------------------------|---|----------|----------|---|-------|----------|----------------|--------------|-------------------|--------------------------------------------|
| GPSGVXSAQXXR 0 2 9 0 59   | 1 | 707.8217 | 1413.629 | 2 | 55.54 | 1.80E-05 | GPSGAVSEAQLYR  | Phospho (ST) | 0.0000001000000.0 | Synth_pep_35V.857.857.2.dta                |
| SXPFKXSLXFR 0 1 3 1 208   | 1 | 507.5777 | 1519.711 | 3 | 54.78 | 1.80E-05 | SDFPKASPLFFGK  | Phospho (ST) | 0.0000001000000.0 | Synth_pep_375V.1105.1105.3.dta             |
| SXPFKXSLXFR 0 8 4 1 170   | 1 | 472.2425 | 1413.706 | 3 | 53.64 | 1.80E-05 | SAPFKVSPGLFGK  | Phospho (ST) | 0.0000001000000.0 | Synth_pep_425V.994.994.3.dta               |
| GPSGVXSAQXXR 3 3 2 0 665  | 1 | 737.8384 | 1473.662 | 2 | 53.6  | 1.80E-05 | GPSGVVSAQQLR   | Phospho (ST) | 0.0000001000000.0 | Synth_pep_30V_120502214048.1275.1275.2.dta |
| GPSGVXSAQXXR 2 6 2 0 525  | 1 | 698.8089 | 1395.603 | 2 | 55.1  | 1.80E-05 | GPSGVVSAQQLR   | Phospho (ST) | 0.0000001000000.0 | Synth_pep_30V_120502214048.738.738.2.dta   |
| GPSGVXSAQXXR 4 4 3 1 888  | 1 | 642.8033 | 1283.592 | 2 | 52.8  | 1.80E-05 | GPSGVVSAQQLFK  | Phospho (ST) | 0.0000001000000.0 | Synth_pep_35V.976.976.2.dta                |
| GPSGVXSAQXXR 6 3 5 0 1271 | 1 | 699.8397 | 1397.665 | 2 | 56.6  | 1.80E-05 | GPSGVVSAQQLR   | Phospho (ST) | 0.0000001000000.0 | Synth_pep_35V.1225.1225.2.dta              |
| GPSGVXSAQXXR 8 2 0 0 1641 | 1 | 675.8247 | 1349.635 | 2 | 53.79 | 1.70E-05 | GPSGVVSAQQLR   | Phospho (ST) | 0.0000001000000.0 | Synth_pep_375V.849.849.2.dta               |
| SXPFKXSLXFR 1 3 3 1 268   | 1 | 532.9213 | 1595.742 | 3 | 49.9  | 1.70E-05 | SDFPKVSPFFGK   | Phospho (ST) | 0.0000001000000.0 | Synth_pep_375V.1296.1296.3.dta             |
| SXPFKXSLXFR 4 9 9 1 1000  | 1 | 524.2499 | 1569.728 | 3 | 54.36 | 1.70E-05 | SGPKVSPVLYFGK  | Phospho (ST) | 0.0000001000000.0 | Synth_pep_375V.1025.1025.3.dta             |
| GPSGVXSAQXXR 1 6 1 1 324  | 1 | 670.791  | 1339.567 | 2 | 50.52 | 1.70E-05 | GPSGVVSAQQLDK  | Phospho (ST) | 0.0000001000000.0 | Synth_pep_375V.737.737.2.dta               |
| SXPFKXSLXFR 2 6 9 1 540   | 1 | 522.9119 | 1565.714 | 3 | 51.64 | 1.70E-05 | SEPKVSPVLYFGK  | Phospho (ST) | 0.0000001000000.0 | Synth_pep_40V.911.911.3.dta                |
| SXPFKXSLXFR 0 8 9 1 180   | 1 | 507.5904 | 1519.749 | 3 | 54.75 | 1.70E-05 | SAPFKVSPVLYFGK | Phospho (ST) | 0.0000001000000.0 | Synth_pep_425V.1042.1042.3.dta             |
| GPSGVXSAQXXR 1 8 2 0 365  | 1 | 697.8175 | 1393.621 | 2 | 54.55 | 1.70E-05 | GPSGDVSAQQLR   | Phospho (ST) | 0.0000001000000.0 | Synth_pep_30V_120502214048.891.891.2.dta   |
| GPSGVXSAQXXR 3 2 1 1 644  | 1 | 707.813  | 1413.612 | 2 | 53.82 | 1.70E-05 | GPSGVVSAQQLDK  | Phospho (ST) | 0.0000001000000.0 | Synth_pep_30V_120502214048.958.958.2.dta   |
| SXPFKXSLXFR 2 3 5 0 471   | 1 | 535.5999 | 1603.778 | 3 | 52.59 | 1.70E-05 | SEPKVSPVLYFGK  | Phospho (ST) | 0.0000001000000.0 | AIC_synth_45.1613.1613.3.dta               |
| SXPFKXSLXFR 0 6 2 1 126   | 1 | 492.2375 | 1473.691 | 3 | 56.44 | 1.70E-05 | SAPFKVSPLEFGK  | Phospho (ST) | 0.0000001000000.0 | AIC_synth_45.973.973.3.dta                 |
| SXPFKXSLXFR 5 0 2 1 1006  | 1 | 500.9219 | 1499.744 | 3 | 55.15 | 1.70E-05 | SDFPKVSPLEFGK  | Phospho (ST) | 0.0000001000000.0 | Synth_pep_35V.1053.1053.3.dta              |
| GPSGVXSAQXXR 5 5 1 0 1103 | 1 | 696.8473 | 1391.68  | 2 | 54.28 | 1.60E-05 | GPSGLVSAQQLDR  | Phospho (ST) | 0.0000001000000.0 | Synth_pep_30V_120502214048.1234.1234.2.dta |
| GPSGVXSAQXXR 5 5 7 0 1115 | 1 | 689.8583 | 1377.702 | 2 | 53.77 | 1.60E-05 | GPSGLVSAQQLTR  | Phospho (ST) | 0.0000001000000.0 | AIC_synth_test_25.1668.1668.2.dta          |
| SXPFKXSLXFR 4 0 9 0 819   | 1 | 502.909  | 1505.705 | 3 | 52.56 | 1.60E-05 | SGPKVSPVLYFGK  | Phospho (ST) | 0.0000001000000.0 | Synth_pep_425V.961.961.3.dta               |
| GPSGVXSAQXXR 1 1 2 0 225  | 1 | 705.7979 | 1409.581 | 2 | 52.62 | 1.60E-05 | GPSGDVSAQQLR   | Phospho (ST) | 0.0000001000000.0 | Synth_pep_325V.746.746.2.dta               |
| GPSGVXSAQXXR 3 8 3 0 767  | 1 | 722.8522 | 1443.69  | 2 | 53.92 | 1.60E-05 | GPSGVVSAQLFR   | Phospho (ST) | 0.0000001000000.0 | Synth_pep_325V.1407.1407.2.dta             |
| SXPFKXSLXFR 4 5 2 0 905   | 1 | 505.5848 | 1513.733 | 3 | 56.01 | 1.60E-05 | SDFPKVSPLEFGK  | Phospho (ST) | 0.0000001000000.0 | AIC_synth_45.1397.1397.3.dta               |
| SXPFKXSLXFR 5 5 2 0 1105  | 1 | 524.2723 | 1569.795 | 3 | 52.39 | 1.60E-05 | SLPKVSPLEFGK   | Phospho (ST) | 0.0000001000000.0 | Synth_pep_425V.1220.1220.3.dta             |
| GPSGVXSAQXXR 9 1 1 0 1823 | 1 | 722.8105 | 1443.606 | 2 | 53.3  | 1.60E-05 | GPSGVVSAQQLDR  | Phospho (ST) | 0.0000001000000.0 | AIC_synth_test_25.943.943.2.dta            |
| GPSGVXSAQXXR 2 9 7 0 595  | 1 | 722.8256 | 1443.637 | 2 | 55.99 | 1.60E-05 | GPSGVVSAQQLTR  | Phospho (ST) | 0.0000001000000.0 | Synth_pep_35V.905.905.2.dta                |
| GPSGVXSAQXXR 2 9 7 0 595  | 1 | 722.8266 | 1443.639 | 2 | 56.06 | 1.60E-05 | GPSGVVSAQQLTR  | Phospho (ST) | 0.0000001000000.0 | Synth_pep_325V.904.904.2.dta               |
| GPSGVXSAQXXR 0 5 2 1 106  | 1 | 668.8292 | 1335.644 | 2 | 55.74 | 1.60E-05 | GPSGAVSAQLEK   | Phospho (ST) | 0.0000001000000.0 | Synth_pep_30V_120502214048.1051.1051.2.dta |
| GPSGVXSAQXXR 0 3 4 0 691  | 1 | 663.8137 | 1325.613 | 2 | 51.1  | 1.50E-05 | GPSGVVSAQQLGR  | Phospho (ST) | 0.0000001000000.0 | Synth_pep_35V.1011.1011.2.dta              |
| GPSGVXSAQXXR 5 3 5 1 1072 | 1 | 698.8646 | 1395.715 | 2 | 52.8  | 1.50E-05 | GPSGLVSAQQLK   | Phospho (ST) | 0.0000001000000.0 | Synth_pep_30V_120502214048.1465.1465.2.dta |
| SXPFKXSLXFR 5 5 1 0 1103  | 1 | 519.601  | 1555.781 | 3 | 53.76 | 1.50E-05 | SLPKVSPVLYFGK  | Phospho (ST) | 0.0000001000000.0 | Synth_pep_425V.1233.1233.3.dta             |
| GPSGVXSAQXXR 3 3 5 0 671  | 1 | 486.9096 | 1457.707 | 3 | 51.76 | 1.50E-05 | GPSGVVSAQQLR   | Phospho (ST) | 0.0000001000000.0 | Synth_pep_425V.1402.1402.3.dta             |
| SXPFKXSLXFR 5 0 1 0 1003  | 1 | 505.5844 | 1513.731 | 3 | 57.36 | 1.50E-05 | SLPKVSPVLYFGK  | Phospho (ST) | 0.0000001000000.0 | Synth_pep_40V.1063.1063.3.dta              |
| SXPFKXSLXFR 4 6 9 1 940   | 1 | 498.9508 | 1493.696 | 3 | 57.63 | 1.50E-05 | SDFPKVSPVLYFGK | Phospho (ST) | 0.0000001000000.0 | Synth_pep_35V.931.931.3.dta                |
| GPSGVXSAQXXR 0 2 4 0 49   | 1 | 654.8007 | 1307.587 | 2 | 55.71 | 1.50E-05 | GPSGAVSEAQLGR  | Phospho (ST) | 0.0000001000000.0 | Synth_pep_325V.775.775.2.dta               |
| GPSGVXSAQXXR 0 0 8 0 17   | 1 | 646.8226 | 1291.631 | 2 | 51    | 1.50E-05 | GPSGAVSAQQLR   | Phospho (ST) | 0.0000001000000.0 | Synth_pep_375V.875.875.2.dta               |
| GPSGVXSAQXXR 0 2 3 0 47   | 1 | 699.8244 | 1397.634 | 2 | 53.35 | 1.50E-05 | GPSGVVSAQQLFR  | Phospho (ST) | 0.0000001000000.0 | Synth_pep_35V.1018.1018.2.dta              |
| SXPFKXSLXFR 9 9 2 1 1986  | 1 | 548.2563 | 1641.747 | 3 | 48.27 | 1.50E-05 | SDFPKVSPLEFGK  | Phospho (ST) | 0.0000001000000.0 | Synth_pep_425V.1050.1050.3.dta             |
| SXPFKXSLXFR 0 5 2 1 106   | 1 | 500.9225 | 1499.746 | 3 | 55.28 | 1.50E-05 | SDFPKVSPLEFGK  | Phospho (ST) | 0.0000001000000.0 | Synth_pep_425V.1099.1099.3.dta             |
| SXPFKXSLXFR 5 3 9 0 1079  | 1 | 546.9419 | 1637.804 | 3 | 49.54 | 1.50E-05 | SLPKVSPVLYFGK  | Phospho (ST) | 0.0000001000000.0 | Synth_pep_425V.1258.1258.3.dta             |
| GPSGVXSAQXXR 2 7 1 0 543  | 1 | 698.811  | 1395.608 | 2 | 55.94 | 1.50E-05 | GPSGVVSAQQLDR  | Phospho (ST) | 0.0000001000000.0 | AIC_synth_test_25.815.815.2.dta            |
| GPSGVXSAQXXR 9 6 9 1 1940 | 1 | 718.8248 | 1435.635 | 2 | 48.37 | 1.50E-05 | GPSGVVSAQQLYK  | Phospho (ST) | 0.0000001000000.0 | Synth_pep_30V_120502214048.899.899.2.dta   |
| GPSGVXSAQXXR 2 3 2 1 466  | 1 | 714.8257 | 1427.637 | 2 | 50.31 | 1.50E-05 | GPSGVVSAQLEK   | Phospho (ST) | 0.0000001000000.0 | Synth_pep_325V.1059.1059.2.dta             |
| GPSGVXSAQXXR 5 5 5 1 1112 | 1 | 681.8724 | 1361.73  | 2 | 52.07 | 1.40E-05 | GPSGLVSAQQLK   | Phospho (ST) | 0.0000001000000.0 | Synth_pep_30V_120502214048.1480.1480.2.dta |
| GPSGVXSAQXXR 0 1 0 0 21   | 1 | 436.8693 | 1307.586 | 3 | 55.8  | 1.40E-05 | GPSGAVSAQQLAR  | Phospho (ST) | 0.0000001000000.0 | Synth_pep_425V.769.769.3.dta               |
| SXPFKXSLXFR 2 0 0 0 401   | 1 | 496.2405 | 1485.7   | 3 | 55.78 | 1.40E-05 | SEPKVSPVLYFGK  | Phospho (ST) | 0.0000001000000.0 | Synth_pep_425V.929.929.3.dta               |
| SXPFKXSLXFR 4 4 0 0 881   | 1 | 467.5617 | 1399.663 | 3 | 58.07 | 1.40E-05 | SGPKVSPVLYFGK  | Phospho (ST) | 0.0000001000000.0 | Synth_pep_425V.889.889.3.dta               |
| GPSGVXSAQXXR 0 3 0 0 61   | 1 | 670.822  | 1339.629 | 2 | 53.51 | 1.40E-05 | GPSGAVSAQQLAR  | Phospho (ST) | 0.0000001000000.0 | Synth_pep_35V.1040.1040.2.dta              |
| GPSGVXSAQXXR 0 9 4 0 189  | 1 | 671.811  | 1341.608 | 2 | 51.65 | 1.40E-05 | GPSGAVSAQQLGR  | Phospho (ST) | 0.0000001000000.0 | Synth_pep_35V.865.865.2.dta                |
| SXPFKXSLXFR 4 3 9 0 879   | 1 | 528.2532 | 1581.738 | 3 | 48.55 | 1.40E-05 | SGPKVSPVLYFGK  | Phospho (ST) | 0.0000001000000.0 | Synth_pep_425V.1163.1163.3.dta             |
| GPSGVXSAQXXR 1 5 3 0 307  | 1 | 713.8401 | 1425.666 | 2 | 53.8  | 1.40E-05 | GPSGVVSAQQLFR  | Phospho (ST) | 0.0000001000000.0 | Synth_pep_275V.1445.1445.2.dta             |
| SXPFKXSLXFR 5 8 8 0 1177  | 1 | 509.6099 | 1525.808 | 3 | 48.5  | 1.40E-05 | SLPKVSPVLYFGK  | Phospho (ST) | 0.0000001000000.0 | AIC_synth_45.1542.1542.3.dta               |
| SXPFKXSLXFR 0 8 8 0 177   | 1 | 495.5944 | 1483.761 | 3 | 50.43 | 1.40E-05 | SAPFKVSPVLYFGK | Phospho (ST) | 0.0000001000000.0 | AIC_synth_45.1324.1324.3.dta               |
| GPSGVXSAQXXR 2 5 9 0 519  | 1 | 728.8458 | 1455.677 | 2 | 53.65 | 1.40E-05 | GPSGLVSAQQLYR  | Phospho (ST) | 0.0000001000000.0 | Synth_pep_275V.1169.1169.2.dta             |
| GPSGVXSAQXXR 0 0 4 0 9    | 1 | 625.7975 | 1249.58  | 2 | 56.01 | 1.40E-05 | GPSGAVSAQQLGR  | Phospho (ST) | 0.0000001000000.0 | Synth_pep_30V_120502214048.769.769.2.dta   |
| GPSGVXSAQXXR 3 1 8 0 637  | 1 | 706.8287 | 1411.643 | 2 | 52.09 | 1.40E-05 | GPSGVVSAQQLVR  | Phospho (ST) | 0.0000001000000.0 | Synth_pep_275V.1229.1229.2.dta             |
| GPSGVXSAQXXR 0 0 5 0 11   | 1 | 653.8292 | 1305.644 | 2 | 48.66 | 1.40E-05 | GPSGAVSAQQLR   | Phospho (ST) | 0.0000001000000.0 | Synth_pep_375V.994.994.2.dta               |
| SXPFKXSLXFR 4 8 8 1 978   | 1 | 481.5864 | 1441.737 | 3 | 54.02 | 1.40E-05 | SGPKVSPVLYFGK  | Phospho (ST) | 0.0000001000000.0 | Synth_pep_40V.1058.1058.3.dta              |
| GPSGVXSAQXXR 3 1 9 0 639  | 1 | 738.8273 | 1475.64  | 2 | 54.91 | 1.40E-05 | GPSGVVSAQQLYR  | Phospho (ST) | 0.0000001000000.0 | Synth_pep_30V_120502214048.1069.1069.2.dta |
| GPSGVXSAQXXR 5 7 0 0 1141 | 1 | 668.8328 | 1335.651 | 2 | 54.45 | 1.40E-05 | GPSGLVSAQQLAR  | Phospho (ST) | 0.0000001000000.0 | Synth_pep_35V.937.937.2.dta                |
| GPSGVXSAQXXR 6 4 9 1 1300 | 1 | 665.8053 | 1329.596 | 2 | 56.9  | 1.40E-05 | GPSGVVSAQQLYK  | Phospho (ST) | 0.0000001000000.0 | Synth_pep_35V.783.783.2.dta                |
| GPSGVXSAQXXR 2 2 9 0 459  | 1 | 736.8238 | 1471.633 | 2 | 55.24 | 1.30E-05 | GPSGVVSAQQLYR  | Phospho (ST) | 0.0000001000000.0 | Synth_pep_35V.862.862.2.dta                |
| SXPFKXSLXFR 2 8 1 0 563   | 1 | 520.2473 | 1557.72  | 3 | 56.48 | 1.30E-05 | SEPKVSPVLYFGK  | Phospho (ST) | 0.0000001000000.0 | Synth_pep_425V.1065.1065.3.dta             |
| GPSGVXSAQXXR 2 2 8 0 457  | 1 | 704.8268 | 1407.639 | 2 | 56.93 | 1.30E-05 | GPSGVVSAQQLVR  | Phospho (ST) | 0.0000001000000.0 | Synth_pep_325V.848.848.2.dta               |
| SXPFKXSLXFR 2 0 1 0 403   | 1 | 510.9039 | 1529.689 | 3 | 58.03 | 1.30E-05 | SDFPKVSPVLYFGK | Phospho (ST) | 0.0000001000000.0 | Synth_pep_40V.960.960.3.dta                |
| SXPFKXSLXFR 1 3 0 1 262   | 1 | 507.578  | 1519.712 | 3 | 56.24 | 1.30E-05 | SDFPKVSPVLYFGK | Phospho (ST) | 0.0000001000000.0 | Synth_pep_375V.1176.1176.3.dta             |
| SXPFKXSLXFR 9 6 9 1 1940  | 1 | 534.2523 | 1599.735 | 3 | 52.83 | 1.30E-05 | SDFPKVSPVLYFGK | Phospho (ST) | 0.0000001000000.0 | Synth_pep_425V.974.974.3.dta               |
| GPSGVXSAQXXR 1 6 1 1 324  | 1 | 670.7916 | 1339.569 | 2 | 51.12 | 1.30E-05 | GPSGVVSAQQLDK  | Phospho (ST) | 0.0000001000000.0 | Synth_pep_30V_120502214048.720.720.2.dta   |
| SXPFKXSLXFR 5 3 1 0 1063  | 1 | 530.9288 | 1589.765 | 3 | 54.3  | 1.30E-05 | SLPKVSPVLYFGK  | Phospho (ST) | 0.0000001000000.0 | Synth_pep_425V.1265.1265.3.dta             |
| SXPFKXSLXFR 5 3 1 0 1063  | 1 | 530.9292 | 1589.766 | 3 | 54.27 | 1.30E-05 | SLPKVSPVLYFGK  | Phospho (ST) | 0.0000001000000.0 | Synth_pep_375V.1264.1264.3.dta             |
| SXPFKXSLXFR 0 2 2 0 45    | 1 | 515.5765 | 1543.708 | 3 | 57.1  | 1.30E-05 | SDFPKVSPLEFGK  | Phospho (ST) | 0.0000001000000.0 | AIC_synth_45.1038.1038.3.dta               |
| GPSGVXSAQXXR 2 4 1 0 483  | 1 | 676.794  | 1351.574 | 2 | 53.11 | 1.30E-05 | GPSGVVSAQQLDR  | Phospho (ST) | 0.0000001000000.0 | Synth_pep_275V.776.776.2.dta               |
| SXPFKXSLXFR 2 5 0 0 501   | 1 | 510.256  | 1527.746 | 3 | 56.56 | 1.30E-05 | SEPKVSPVLYFGK  | Phospho (ST) | 0.0000001000000.0 | Synth_pep_40V.1104.1104.3.dta              |
| SXPFKXSLXFR 2 4 2 1 486   | 1 | 501.5685 | 1501.684 | 3 | 56.97 | 1.30E-05 | SEPKVSPVLYFGK  | Phospho (ST) | 0.0000001000000.0 | Synth_pep_425V.883.883.3.dta               |
| GPSGVXSAQXXR 8 8 8 0 1777 | 1 | 674.8535 | 1347.693 | 2 | 49    | 1.30E-05 | GPSGVVSAQQLVR  | Phospho (ST) | 0.0000001000000.0 | Synth_pep_375V.1100.1100.2.dta             |
| SXPFKXSLXFR 2 2 0 0 441   | 1 | 515.5753 | 1543.704 | 3 | 56.   |          |                |              |                   |                                            |

|               |         |      |   |          |          |   |       |          |                |              |                   |                                            |
|---------------|---------|------|---|----------|----------|---|-------|----------|----------------|--------------|-------------------|--------------------------------------------|
| SXPFKXSPLXFRG | 0 9 3 1 | 188  | 1 | 523.5897 | 1567.747 | 3 | 54.11 | 1.10E-05 | SAPFKYSPLFFGK  | Phospho (ST) | 0.0000001000000.0 | Synth_pep_425V.1105.1105.3.dta             |
| GPSGVSAQAQLXR | 0 1 4 0 | 29   | 1 | 647.7934 | 1293.572 | 2 | 60.57 | 1.10E-05 | GPSGVSAQAQLGR  | Phospho (ST) | 0.0000001000000.0 | Synth_pep_375V.744.744.2.dta               |
| SXPFKXSPLXFRG | 4 3 9 0 | 879  | 1 | 528.2529 | 1581.737 | 3 | 49.78 | 1.10E-05 | SGPFFKSPLYFGR  | Phospho (ST) | 0.0000001000000.0 | AIC_synth_45.1494.1494.3.dta               |
| GPSGVSAQAQLXR | 9 4 1 1 | 1884 | 1 | 679.806  | 1357.598 | 2 | 56.91 | 1.10E-05 | GPSGVSAQAQLDK  | Phospho (ST) | 0.0000001000000.0 | AIC_synth_test_25.879.879.2.dta            |
| GPSGVSAQAQLXR | 1 1 1 0 | 223  | 1 | 466.1958 | 1395.566 | 3 | 51.72 | 1.10E-05 | GPSGDVSDAQLDR  | Phospho (ST) | 0.0000001000000.0 | Synth_pep_40V.736.736.3.dta                |
| GPSGVSAQAQLXR | 3 2 8 0 | 657  | 1 | 713.8405 | 1425.666 | 2 | 55.72 | 1.10E-05 | GPSGVSEQAQLVR  | Phospho (ST) | 0.0000001000000.0 | Synth_pep_325V.1075.1075.2.dta             |
| GPSGVSAQAQLXR | 5 3 5 1 | 1072 | 1 | 698.8652 | 1395.716 | 2 | 54.58 | 1.00E-05 | GPSGLVSAQLLK   | Phospho (ST) | 0.0000001000000.0 | Synth_pep_325V.1424.1424.2.dta             |
| GPSGVSAQAQLXR | 5 5 8 1 | 1118 | 1 | 674.8665 | 1347.719 | 2 | 54.6  | 1.00E-05 | GPSGLVSAQLVK   | Phospho (ST) | 0.0000001000000.0 | Synth_pep_275V.1473.1473.2.dta             |
| SXPFKXSPLXFRG | 4 4 0 1 | 882  | 1 | 458.2267 | 1371.658 | 3 | 55.58 | 1.00E-05 | SGPFFKSPPLAFGK | Phospho (ST) | 0.0000001000000.0 | Synth_pep_35V.892.892.3.dta                |
| SXPFKXSPLXFRG | 0 9 9 1 | 200  | 1 | 528.9217 | 1583.743 | 3 | 56.37 | 1.00E-05 | SAPFKYSPLYFGK  | Phospho (ST) | 0.0000001000000.0 | Synth_pep_375V.1017.1017.3.dta             |
| GPSGVSAQAQLXR | 0 8 8 0 | 177  | 1 | 660.8367 | 1319.659 | 2 | 51.1  | 1.00E-05 | GPSGVSAQAQLVR  | Phospho (ST) | 0.0000001000000.0 | Synth_pep_275V.1237.1237.2.dta             |
| GPSGVSAQAQLXR | 1 2 1 0 | 243  | 1 | 470.8683 | 1409.833 | 3 | 54.61 | 1.00E-05 | GPSGDVSEQAQLDR | Phospho (ST) | 0.0000001000000.0 | Synth_pep_375V.758.758.3.dta               |
| GPSGVSAQAQLXR | 6 5 1 1 | 1304 | 1 | 669.8184 | 1337.622 | 2 | 55.95 | 1.00E-05 | GPSGVSLAQLDK   | Phospho (ST) | 0.0000001000000.0 | Synth_pep_275V.970.970.2.dta               |
| GPSGVSAQAQLXR | 9 5 5 1 | 1912 | 1 | 471.5776 | 1411.711 | 3 | 56.01 | 1.00E-05 | GPSGVSLAQLLK   | Phospho (ST) | 0.0000001000000.0 | Synth_pep_375V.1297.1297.3.dta             |
| SXPFKXSPLXFRG | 8 0 9 0 | 1619 | 1 | 516.9245 | 1547.752 | 3 | 54.86 | 1.00E-05 | SVPFKASPLYFGR  | Phospho (ST) | 0.0000001000000.0 | Synth_pep_425V.1058.1058.3.dta             |
| GPSGVSAQAQLXR | 9 2 4 0 | 1849 | 1 | 700.8146 | 1399.615 | 2 | 56.54 | 1.00E-05 | GPSGVSEQAQLGR  | Phospho (ST) | 0.0000001000000.0 | Synth_pep_275V.880.880.2.dta               |
| SXPFKXSPLXFRG | 5 1 0 1 | 1022 | 1 | 496.2498 | 1485.728 | 3 | 58.4  | 1.00E-05 | SPLPKDSPLAFGK  | Phospho (ST) | 0.0000001000000.0 | Synth_pep_425V.1002.1002.3.dta             |
| GPSGVSAQAQLXR | 4 3 9 0 | 879  | 1 | 709.8262 | 1417.638 | 2 | 58.06 | 1.00E-05 | GPSGVSEQAQLVR  | Phospho (ST) | 0.0000001000000.0 | Synth_pep_325V.1115.1115.2.dta             |
| GPSGVSAQAQLXR | 8 3 0 1 | 1662 | 1 | 670.8347 | 1339.655 | 2 | 59.54 | 1.00E-05 | GPSGVSEQAQLAK  | Phospho (ST) | 0.0000001000000.0 | Synth_pep_325V.1135.1135.2.dta             |
| GPSGVSAQAQLXR | 0 2 7 0 | 55   | 1 | 676.8148 | 1351.615 | 2 | 56.09 | 1.00E-05 | GPSGVSEQAQLTR  | Phospho (ST) | 0.0000001000000.0 | Synth_pep_375V.771.771.2.dta               |
| GPSGVSAQAQLXR | 1 8 2 0 | 365  | 1 | 697.8198 | 1393.625 | 2 | 61.53 | 9.90E-06 | GPSGDVSDAQLER  | Phospho (ST) | 0.0000001000000.0 | Synth_pep_275V.915.915.2.dta               |
| SXPFKXSPLXFRG | 4 1 1 1 | 824  | 1 | 492.2241 | 1473.651 | 3 | 56.28 | 9.90E-06 | SGPFFKSPPLDFGK | Phospho (ST) | 0.0000001000000.0 | AIC_synth_45.1092.1092.3.dta               |
| GPSGVSAQAQLXR | 8 0 4 0 | 1609 | 1 | 639.8156 | 1277.617 | 2 | 51.37 | 8.80E-06 | GPSGVSEQAQLGR  | Phospho (ST) | 0.0000001000000.0 | AIC_synth_test_25.1007.1007.2.dta          |
| GPSGVSAQAQLXR | 2 1 9 0 | 439  | 1 | 729.8165 | 1457.619 | 2 | 56.53 | 9.70E-06 | GPSGDVSDAQLVR  | Phospho (ST) | 0.0000001000000.0 | Synth_pep_275V.852.852.2.dta               |
| GPSGVSAQAQLXR | 0 4 9 0 | 99   | 1 | 671.8115 | 1341.608 | 2 | 53.36 | 9.70E-06 | GPSGVSEQAQLVR  | Phospho (ST) | 0.0000001000000.0 | Synth_pep_275V.840.840.2.dta               |
| GPSGVSAQAQLXR | 0 2 3 0 | 47   | 1 | 699.8246 | 1397.635 | 2 | 55.11 | 9.70E-06 | GPSGVSEQAQLFR  | Phospho (ST) | 0.0000001000000.0 | Synth_pep_375V.1001.1001.2.dta             |
| GPSGVSAQAQLXR | 9 0 3 0 | 1807 | 1 | 716.8348 | 1431.655 | 2 | 57.33 | 9.70E-06 | GPSGVSEQAQLFR  | Phospho (ST) | 0.0000001000000.0 | Synth_pep_275V.1262.1262.2.dta             |
| GPSGVSAQAQLXR | 0 3 0 0 | 61   | 1 | 670.8217 | 1339.629 | 2 | 55.15 | 9.60E-06 | GPSGVSEQAQLAR  | Phospho (ST) | 0.0000001000000.0 | Synth_pep_375V.1028.1028.2.dta             |
| SXPFKXSPLXFRG | 2 6 0 1 | 522  | 1 | 492.2368 | 1473.689 | 3 | 58.28 | 9.60E-06 | SEPFKSPPLAFGK  | Phospho (ST) | 0.0000001000000.0 | Synth_pep_425V.874.874.3.dta               |
| SXPFKXSPLXFRG | 3 8 9 0 | 779  | 1 | 542.2678 | 1623.782 | 3 | 50.24 | 9.50E-06 | SXPFKYSPLYFGR  | Phospho (ST) | 0.0000001000000.0 | Synth_pep_425V.1204.1204.3.dta             |
| GPSGVSAQAQLXR | 5 8 9 0 | 1179 | 1 | 713.859  | 1425.704 | 2 | 53.44 | 9.50E-06 | GPSGLVSAQAQLVR | Phospho (ST) | 0.0000001000000.0 | Synth_pep_30V_120502214048.1233.1233.2.dta |
| GPSGVSAQAQLXR | 0 4 1 0 | 83   | 1 | 647.7917 | 1293.569 | 2 | 59.99 | 9.50E-06 | GPSGVSEQAQLDR  | Phospho (ST) | 0.0000001000000.0 | Synth_pep_325V.767.767.2.dta               |
| SXPFKXSPLXFRG | 2 6 2 1 | 526  | 1 | 511.5725 | 1531.696 | 3 | 51.54 | 9.50E-06 | SEPFKSPLEFGK   | Phospho (ST) | 0.0000001000000.0 | AIC_synth_45.997.997.3.dta                 |
| GPSGVSAQAQLXR | 5 3 8 1 | 1078 | 1 | 461.5748 | 1381.703 | 3 | 55.81 | 9.40E-06 | GPSGLVSAQAQLVK | Phospho (ST) | 0.0000001000000.0 | Synth_pep_425V.1277.1277.3.dta             |
| GPSGVSAQAQLXR | 3 9 0 0 | 781  | 1 | 716.8331 | 1431.652 | 2 | 58.99 | 9.30E-06 | GPSGVSEQAQLAR  | Phospho (ST) | 0.0000001000000.0 | Synth_pep_30V_120502214048.1138.1138.2.dta |
| GPSGVSAQAQLXR | 4 3 4 0 | 869  | 1 | 656.806  | 1311.597 | 2 | 57    | 9.30E-06 | GPSGVSEQAQLGR  | Phospho (ST) | 0.0000001000000.0 | Synth_pep_275V.1058.1058.2.dta             |
| SXPFKXSPLXFRG | 6 5 1 1 | 1304 | 1 | 501.5808 | 1501.721 | 3 | 56.76 | 9.20E-06 | SEPFKSPPLDFGK  | Phospho (ST) | 0.0000001000000.0 | Synth_pep_40V.1114.1114.3.dta              |
| GPSGVSAQAQLXR | 8 1 2 0 | 1625 | 1 | 697.8195 | 1393.625 | 2 | 57.16 | 9.10E-06 | GPSGDVSDAQLER  | Phospho (ST) | 0.0000001000000.0 | Synth_pep_35V.821.821.2.dta                |
| GPSGVSAQAQLXR | 2 2 0 0 | 441  | 1 | 690.8107 | 1379.607 | 2 | 57.13 | 8.90E-06 | GPSGVSEQAQLAR  | Phospho (ST) | 0.0000001000000.0 | Synth_pep_35V.777.777.2.dta                |
| SXPFKXSPLXFRG | 7 5 9 1 | 1520 | 1 | 522.2649 | 1563.773 | 3 | 54.02 | 8.80E-06 | STPFKSPLYFGK   | Phospho (ST) | 0.0000001000000.0 | Synth_pep_40V.1120.1120.3.dta              |
| GPSGVSAQAQLXR | 0 3 3 0 | 67   | 1 | 708.8372 | 1415.66  | 2 | 57.8  | 8.80E-06 | GPSGVSEQAQLFR  | Phospho (ST) | 0.0000001000000.0 | Synth_pep_325V.1353.1353.2.dta             |
| GPSGVSAQAQLXR | 3 9 0 0 | 781  | 1 | 716.835  | 1431.656 | 2 | 57.74 | 8.80E-06 | GPSGVSEQAQLAR  | Phospho (ST) | 0.0000001000000.0 | Synth_pep_35V.1096.1096.2.dta              |
| SXPFKXSPLXFRG | 2 9 9 0 | 599  | 1 | 557.5914 | 1669.753 | 3 | 50.8  | 8.70E-06 | SEPFKYSPLYFGR  | Phospho (ST) | 0.0000001000000.0 | Synth_pep_40V.1041.1041.3.dta              |
| SXPFKXSPLXFRG | 2 3 9 0 | 479  | 1 | 552.2595 | 1653.757 | 3 | 54.13 | 8.70E-06 | SEPFKSPLYFGR   | Phospho (ST) | 0.0000001000000.0 | Synth_pep_40V.1177.1177.3.dta              |
| SXPFKXSPLXFRG | 4 8 0 0 | 961  | 1 | 481.5769 | 1441.709 | 3 | 58.56 | 8.70E-06 | SXPFKYSPLAFGR  | Phospho (ST) | 0.0000001000000.0 | AIC_synth_45.1245.1245.3.dta               |
| GPSGVSAQAQLXR | 3 8 5 1 | 1772 | 1 | 461.5742 | 1381.701 | 3 | 57.93 | 8.70E-06 | GPSGVSEQAQLLK  | Phospho (ST) | 0.0000001000000.0 | Synth_pep_375V.1298.1298.3.dta             |
| GPSGVSAQAQLXR | 9 4 9 1 | 1900 | 1 | 703.8196 | 1405.625 | 2 | 50.81 | 8.70E-06 | GPSGVSEQAQLYK  | Phospho (ST) | 0.0000001000000.0 | Synth_pep_30V_120502214048.881.881.2.dta   |
| SXPFKXSPLXFRG | 7 6 2 0 | 1525 | 1 | 766.8605 | 1531.706 | 3 | 56.05 | 8.60E-06 | STPFKSPLEFGK   | Phospho (ST) | 0.0000001000000.0 | Synth_pep_275V.944.944.2.dta               |
| SXPFKXSPLXFRG | 7 9 9 1 | 1600 | 1 | 538.9252 | 1613.754 | 3 | 55.13 | 8.30E-06 | STPFKSPLYFGK   | Phospho (ST) | 0.0000001000000.0 | Synth_pep_375V.1026.1026.3.dta             |
| GPSGVSAQAQLXR | 0 4 4 1 | 90   | 1 | 604.7874 | 1207.56  | 2 | 54.72 | 8.30E-06 | GPSGVSEQAQLGK  | Phospho (ST) | 0.0000001000000.0 | Synth_pep_325V.721.721.2.dta               |
| GPSGVSAQAQLXR | 2 1 7 0 | 435  | 1 | 698.808  | 1395.601 | 2 | 58.59 | 8.20E-06 | GPSGDVSDAQLTR  | Phospho (ST) | 0.0000001000000.0 | Synth_pep_40V.743.743.2.dta                |
| GPSGVSAQAQLXR | 5 8 5 1 | 1172 | 1 | 450.2461 | 1347.717 | 3 | 55.71 | 8.10E-06 | GPSGLVSAQAQLLK | Phospho (ST) | 0.0000001000000.0 | Synth_pep_375V.1288.1288.3.dta             |
| SXPFKXSPLXFRG | 6 9 0 1 | 1382 | 1 | 503.5775 | 1507.711 | 3 | 60.48 | 8.00E-06 | SEPFKSPPLAFGK  | Phospho (ST) | 0.0000001000000.0 | Synth_pep_40V.984.984.3.dta                |
| GPSGVSAQAQLXR | 1 9 8 0 | 397  | 1 | 714.8294 | 1427.644 | 2 | 58.51 | 8.00E-06 | GPSGDVSAQAQLVR | Phospho (ST) | 0.0000001000000.0 | Synth_pep_325V.983.983.2.dta               |
| GPSGVSAQAQLXR | 1 0 1 0 | 203  | 1 | 451.5323 | 1351.575 | 3 | 56.73 | 7.90E-06 | GPSGDVSAQAQLDR | Phospho (ST) | 0.0000001000000.0 | Synth_pep_40V.746.746.3.dta                |
| GPSGVSAQAQLXR | 3 3 3 0 | 667  | 1 | 746.8534 | 1491.692 | 2 | 54.52 | 7.90E-06 | GPSGVSEQAQLFR  | Phospho (ST) | 0.0000001000000.0 | Synth_pep_275V.1640.1640.2.dta             |
| GPSGVSAQAQLXR | 3 5 3 0 | 707  | 1 | 729.8579 | 1457.701 | 2 | 58.99 | 7.80E-06 | GPSGVSEQAQLFR  | Phospho (ST) | 0.0000001000000.0 | Synth_pep_30V_120502214048.1568.1568.2.dta |
| SXPFKXSPLXFRG | 1 5 1 0 | 303  | 1 | 520.2479 | 1557.722 | 3 | 58.68 | 7.70E-06 | SDFPKSPPLDFGK  | Phospho (ST) | 0.0000001000000.0 | Synth_pep_40V.1175.1175.3.dta              |
| SXPFKXSPLXFRG | 0 0 9 1 | 20   | 1 | 498.2464 | 1491.717 | 3 | 59.32 | 7.70E-06 | SAPFKYSPLYFGK  | Phospho (ST) | 0.0000001000000.0 | Synth_pep_375V.944.944.3.dta               |
| SXPFKXSPLXFRG | 4 6 1 1 | 924  | 1 | 482.8938 | 1445.66  | 3 | 59.62 | 7.70E-06 | SGPFFKSPPLDFGK | Phospho (ST) | 0.0000001000000.0 | Synth_pep_40V.903.903.3.dta                |
| SXPFKXSPLXFRG | 2 3 1 0 | 463  | 1 | 536.2468 | 1605.719 | 3 | 55.23 | 7.60E-06 | SEPFKSPPLDFGK  | Phospho (ST) | 0.0000001000000.0 | Synth_pep_425V.1178.1178.3.dta             |
| SXPFKXSPLXFRG | 5 0 9 0 | 1019 | 1 | 521.598  | 1561.772 | 3 | 55.49 | 7.60E-06 | SAPFKYSPLYFGR  | Phospho (ST) | 0.0000001000000.0 | Synth_pep_425V.1075.1075.3.dta             |
| SXPFKXSPLXFRG | 2 6 1 1 | 524  | 1 | 506.9002 | 1517.679 | 3 | 55.36 | 7.40E-06 | SEPFKSPPLDFGK  | Phospho (ST) | 0.0000001000000.0 | AIC_synth_45.1039.1039.3.dta               |
| GPSGVSAQAQLXR | 8 9 1 1 | 1784 | 1 | 700.829  | 1399.644 | 2 | 58.27 | 7.40E-06 | GPSGVSEQAQLDK  | Phospho (ST) | 0.0000001000000.0 | Synth_pep_30V_120502214048.962.962.2.dta   |
| GPSGVSAQAQLXR | 2 1 2 0 | 425  | 1 | 712.8066 | 1423.599 | 2 | 58.63 | 7.30E-06 | GPSGVSEQAQLER  | Phospho (ST) | 0.0000001000000.0 | Synth_pep_275V.778.778.2.dta               |
| SXPFKXSPLXFRG | 1 9 9 1 | 1400 | 1 | 543.5837 | 1627.729 | 3 | 51.35 | 7.30E-06 | SDFPKSPLYFGK   | Phospho (ST) | 0.0000001000000.0 | Synth_pep_40V.1071.1071.3.dta              |
| SXPFKXSPLXFRG | 5 0 8 0 | 1017 | 1 | 500.2658 | 1497.776 | 3 | 53.11 | 7.30E-06 | SDFPKSPLYFGR   | Phospho (ST) | 0.0000001000000.0 | AIC_synth_45.1349.1349.3.dta               |
| GPSGVSAQAQLXR | 5 8 2 0 | 1165 | 1 | 696.8485 | 1391.683 | 2 | 59.22 | 7.30E-06 | GPSGLVSAQAQLER | Phospho (ST) | 0.0000001000000.0 | Synth_pep_275V.1156.1156.2.dta             |
| SXPFKXSPLXFRG | 4 1 0 0 | 821  | 1 | 486.8971 | 1457.67  | 3 | 58.65 | 7.30E-06 | SGPFFKSPPLAFGR | Phospho (ST) | 0.0000001000000.0 | Synth_pep_35V.933.933.3.dta                |
| GPSGVSAQAQLXR | 0 3 2 0 | 65   | 1 | 699.824  | 1397.633 | 2 | 57.47 | 7.30E-06 | GPSGVSEQAQLER  | Phospho (ST) | 0.0000001000000.0 | Synth_pep_325V.1034.1034.2.dta             |
| SXPFKXSPLXFRG | 1 8 0 1 | 362  | 1 | 491.5773 | 1471.71  | 3 | 59.64 | 7.20E-06 | SDFPKSPPLAFGK  | Phospho (ST) | 0.0000001000000.0 | Synth_pep_35V.1085.1085.3.dta              |
| GPSGVSAQAQLXR | 1 4 1 1 | 284  | 1 | 655.7874 | 1309.56  | 2 | 60.35 | 7.20E-06 | GPSGDVSEQAQLDK | Phospho (ST) | 0.0000001000000.0 | Synth_pep_275V.736.736.2.dta               |
| GPSGVSAQAQLXR | 5 8 5 0 | 1171 | 1 | 688.8677 | 1375.721 | 2 | 51.68 | 7.10E-06 | GPSGLVSAQAQLR  | Phospho (ST) | 0.0000001000000.0 | Synth_pep_30V_120502214048.1384.1384.2.dta |
| GPSGVSAQAQLXR | 5 7 3   |      |   |          |          |   |       |          |                |              |                   |                                            |

|               |           |      |   |          |          |   |       |          |               |              |                   |                                            |
|---------------|-----------|------|---|----------|----------|---|-------|----------|---------------|--------------|-------------------|--------------------------------------------|
| SXPFKXSPLXFG  | [5 4 0 1] | 1082 | 1 | 476.9148 | 1427.723 | 3 | 58.4  | 5.90E-06 | SLPFKGSPLAFGK | Phospho (ST) | 0.0000001000000.0 | Synth_pep_375V.982.982.3.dta               |
| SXPFKXSPLXFG  | [7 9 2 0] | 1585 | 2 | 804.875  | 1607.735 | 2 | 58.66 | 5.90E-06 | STPFKYSPLFFGR | Phospho (ST) | 0.0000001000000.0 | Synth_pep_30V_120502214048.1061.1061.2.dta |
| SXPFKXSPLXFG  | [6 8 5 1] | 1372 | 1 | 496.2616 | 1485.763 | 3 | 57.66 | 5.90E-06 | SDPFKYSPLFFGK | Phospho (ST) | 0.0000001000000.0 | Synth_pep_375V.1122.1122.3.dta             |
| SXPFKXSPLXFG  | [1 9 9 1] | 400  | 1 | 543.5848 | 1627.733 | 3 | 53.16 | 5.90E-06 | SPFKKYSPLYFGK | Phospho (ST) | 0.0000001000000.0 | Synth_pep_375V.1078.1078.3.dta             |
| GPSGVXSQAQLXR | [9 8 4 0] | 1969 | 1 | 685.8262 | 1369.638 | 2 | 58.88 | 5.80E-06 | GPSGVVSAQLGR  | Phospho (ST) | 0.0000001000000.0 | Synth_pep_275V.1016.1016.2.dta             |
| GPSGVXSQAQLXR | [2 7 5 0] | 551  | 2 | 697.8376 | 1393.661 | 2 | 58.88 | 5.80E-06 | GPSGVVSTAQLLR | Phospho (ST) | 0.0000001000000.0 | Synth_pep_325V.973.973.2.dta               |
| SXPFKXSPLXFG  | [5 6 0 1] | 1122 | 1 | 486.9176 | 1457.371 | 3 | 59.55 | 5.70E-06 | SLPFKGSPLAFGK | Phospho (ST) | 0.0000001000000.0 | Synth_pep_40V.976.976.3.dta                |
| GPSGVXSQAQLXR | [4 8 5 1] | 972  | 1 | 646.8343 | 1291.654 | 2 | 59.58 | 5.70E-06 | GPSGVVSAQLLK  | Phospho (ST) | 0.0000001000000.0 | Synth_pep_275V.1204.1204.2.dta             |
| GPSGVXSQAQLXR | [5 8 9 0] | 1179 | 1 | 713.8592 | 1425.704 | 2 | 55.66 | 5.70E-06 | GPSGLVSAQLYR  | Phospho (ST) | 0.0000001000000.0 | Synth_pep_275V.1277.1277.2.dta             |
| GPSGVXSQAQLXR | [5 8 5 0] | 1171 | 1 | 459.5816 | 1375.723 | 3 | 56.05 | 5.60E-06 | GPSGLVSAQLLR  | Phospho (ST) | 0.0000001000000.0 | Synth_pep_425V.1297.1297.3.dta             |
| SXPFKXSPLXFG  | [2 0 0 0] | 401  | 1 | 496.2407 | 1485.7   | 3 | 59.65 | 5.60E-06 | SGPFKYSPLAFGR | Phospho (ST) | 0.0000001000000.0 | Synth_pep_40V.927.927.3.dta                |
| GPSGVXSQAQLXR | [8 2 5 0] | 1651 | 1 | 464.9007 | 1391.68  | 3 | 58.89 | 5.60E-06 | GPSGVVSEAQLLR | Phospho (ST) | 0.0000001000000.0 | Synth_pep_425V.1215.1215.3.dta             |
| GPSGVXSQAQLXR | [6 8 8 0] | 1377 | 1 | 668.8345 | 1335.655 | 2 | 55.27 | 5.60E-06 | GPSGVVSAQLVR  | Phospho (ST) | 0.0000001000000.0 | Synth_pep_375V.974.974.2.dta               |
| SXPFKXSPLXFG  | [4 0 4 0] | 809  | 1 | 700.8385 | 1399.663 | 2 | 62.08 | 5.50E-06 | SGPFKYSPLFFGR | Phospho (ST) | 0.0000001000000.0 | Synth_pep_275V.968.968.2.dta               |
| SXPFKXSPLXFG  | [0 6 0 1] | 122  | 1 | 472.9022 | 1415.685 | 3 | 61.77 | 5.40E-06 | SAPFKSPLAFGK  | Phospho (ST) | 0.0000001000000.0 | Synth_pep_40V.856.856.3.dta                |
| GPSGVXSQAQLXR | [5 2 4 0] | 1049 | 1 | 675.8233 | 1349.632 | 2 | 58.67 | 5.40E-06 | GPSGLVSAQLGR  | Phospho (ST) | 0.0000001000000.0 | Synth_pep_35V.936.936.2.dta                |
| GPSGVXSQAQLXR | [3 8 9 0] | 779  | 1 | 730.8494 | 1459.684 | 2 | 58.74 | 5.40E-06 | GPSGVVSAQLYR  | Phospho (ST) | 0.0000001000000.0 | Synth_pep_30V_120502214048.1232.1232.2.dta |
| SXPFKXSPLXFG  | [6 5 5 1] | 1312 | 1 | 500.9332 | 1499.778 | 3 | 57.1  | 5.30E-06 | SSPFKLSPLFFGK | Phospho (ST) | 0.0000001000000.0 | Synth_pep_425V.1197.1197.3.dta             |
| GPSGVXSQAQLXR | [9 6 1 0] | 1923 | 1 | 472.8757 | 1415.605 | 3 | 60.63 | 5.30E-06 | GPSGVVSAQLDR  | Phospho (ST) | 0.0000001000000.0 | Synth_pep_425V.801.801.3.dta               |
| GPSGVXSQAQLXR | [3 5 5 1] | 712  | 1 | 466.2457 | 1395.715 | 3 | 57.54 | 5.20E-06 | GPSGVVLAQLLK  | Phospho (ST) | 0.0000001000000.0 | Synth_pep_40V.1386.1386.3.dta              |
| SXPFKXSPLXFG  | [2 2 9 1] | 460  | 1 | 536.9156 | 1607.725 | 3 | 55.76 | 5.20E-06 | SPFKKYSPLYFGK | Phospho (ST) | 0.0000001000000.0 | Synth_pep_40V.929.929.3.dta                |
| SXPFKXSPLXFG  | [6 6 2 0] | 1325 | 1 | 759.8521 | 1517.69  | 2 | 57.83 | 5.20E-06 | SDPFKYSPLFFGR | Phospho (ST) | 0.0000001000000.0 | Synth_pep_30V_120502214048.916.916.2.dta   |
| GPSGVXSQAQLXR | [5 5 5 1] | 1112 | 1 | 681.8762 | 1361.738 | 2 | 55.09 | 5.10E-06 | GPSGLVSAQLLK  | Phospho (ST) | 0.0000001000000.0 | AIC_synth_test_25.2025.2025.2.dta          |
| GPSGVXSQAQLXR | [3 8 4 0] | 769  | 1 | 677.8292 | 1353.644 | 2 | 59.7  | 5.10E-06 | GPSGVVSAQLGR  | Phospho (ST) | 0.0000001000000.0 | Synth_pep_275V.1171.1171.2.dta             |
| GPSGVXSQAQLXR | [5 6 2 1] | 1126 | 1 | 676.8292 | 1351.644 | 2 | 61.12 | 5.10E-06 | GPSGLVSSAQLLK | Phospho (ST) | 0.0000001000000.0 | Synth_pep_275V.941.941.2.dta               |
| GPSGVXSQAQLXR | [5 6 7 0] | 1135 | 1 | 676.8292 | 1351.644 | 2 | 61.12 | 5.10E-06 | GPSGLVSSAQLTR | Phospho (ST) | 0.0000001000000.0 | Synth_pep_275V.941.941.2.dta               |
| GPSGVXSQAQLXR | [5 5 5 1] | 1112 | 1 | 454.9182 | 1361.733 | 3 | 56.52 | 5.00E-06 | GPSGLVSAQLLK  | Phospho (ST) | 0.0000001000000.0 | Synth_pep_375V.1392.1392.3.dta             |
| GPSGVXSQAQLXR | [5 0 9 0] | 1019 | 1 | 699.8423 | 1397.67  | 2 | 59.56 | 5.00E-06 | GPSGVVSAQLYR  | Phospho (ST) | 0.0000001000000.0 | AIC_synth_test_25.1388.1388.2.dta          |
| GPSGVXSQAQLXR | [8 2 0 0] | 1641 | 1 | 675.8245 | 1349.634 | 2 | 58.99 | 5.00E-06 | GPSGVVSEAQLAR | Phospho (ST) | 0.0000001000000.0 | Synth_pep_325V.864.864.3.dta               |
| SXPFKXSPLXFG  | [4 5 9 1] | 920  | 1 | 507.5906 | 1519.75  | 3 | 59.38 | 5.00E-06 | SGPFKLSPLYFGK | Phospho (ST) | 0.0000001000000.0 | Synth_pep_425V.1124.1124.2.dta             |
| SXPFKXSPLXFG  | [9 2 9 1] | 1860 | 1 | 548.2566 | 1641.748 | 3 | 53.05 | 5.00E-06 | SYPFKYSPLYFGK | Phospho (ST) | 0.0000001000000.0 | AIC_synth_45.1175.1175.3.dta               |
| SXPFKXSPLXFG  | [7 9 3 1] | 1588 | 1 | 533.5923 | 1597.755 | 3 | 56.11 | 4.90E-06 | STPFKYSPLFFGK | Phospho (ST) | 0.0000001000000.0 | Synth_pep_40V.1106.1106.3.dta              |
| SXPFKXSPLXFG  | [1 9 9 0] | 399  | 1 | 552.9196 | 1655.37  | 3 | 56.99 | 4.90E-06 | SPFKKYSPLYFGR | Phospho (ST) | 0.0000001000000.0 | Synth_pep_425V.1089.1089.3.dta             |
| GPSGVXSQAQLXR | [0 5 3 0] | 107  | 1 | 691.8447 | 1381.675 | 2 | 56.93 | 4.90E-06 | GPSGVVSAQLYR  | Phospho (ST) | 0.0000001000000.0 | Synth_pep_35V.1306.1306.2.dta              |
| GPSGVXSQAQLXR | [5 8 1 1] | 1198 | 1 | 466.906  | 1397.696 | 3 | 60.14 | 4.80E-06 | SDPFKYSQAQLVK | Phospho (ST) | 0.0000001000000.0 | Synth_pep_40V.1123.1123.3.dta              |
| GPSGVXSQAQLXR | [2 6 1 0] | 523  | 1 | 691.7986 | 1381.583 | 2 | 59.32 | 4.80E-06 | GPSGVVSAQLDR  | Phospho (ST) | 0.0000001000000.0 | Synth_pep_275V.753.753.2.dta               |
| GPSGVXSQAQLXR | [0 4 0 0] | 81   | 1 | 625.798  | 1249.582 | 2 | 60.26 | 4.70E-06 | GPSGVVSAQLAR  | Phospho (ST) | 0.0000001000000.0 | Synth_pep_35V.745.745.2.dta                |
| GPSGVXSQAQLXR | [3 3 3 0] | 667  | 1 | 746.8514 | 1491.688 | 2 | 58.28 | 4.70E-06 | GPSGVVSAQLFR  | Phospho (ST) | 0.0000001000000.0 | Synth_pep_30V_120502214048.1553.1553.2.dta |
| SXPFKXSPLXFG  | [5 2 9 1] | 1060 | 1 | 531.5971 | 1591.77  | 3 | 54.57 | 4.70E-06 | SLPFKYSPLYFGK | Phospho (ST) | 0.0000001000000.0 | Synth_pep_425V.1028.1028.3.dta             |
| SXPFKXSPLXFG  | [1 8 1 0] | 363  | 1 | 515.5755 | 1543.705 | 3 | 61.33 | 4.60E-06 | SDPFKYSPLDFGR | Phospho (ST) | 0.0000001000000.0 | Synth_pep_40V.1096.1096.3.dta              |
| GPSGVXSQAQLXR | [0 9 8 0] | 197  | 1 | 692.8354 | 1383.656 | 2 | 57.67 | 4.60E-06 | GPSGVVSAQLVR  | Phospho (ST) | 0.0000001000000.0 | Synth_pep_325V.999.999.2.dta               |
| SXPFKXSPLXFG  | [6 0 8 1] | 1218 | 1 | 482.2466 | 1443.718 | 3 | 61.41 | 4.60E-06 | SPFKKYSPLYFGK | Phospho (ST) | 0.0000001000000.0 | Synth_pep_375V.952.952.3.dta               |
| SXPFKXSPLXFG  | [9 4 9 1] | 1900 | 1 | 524.249  | 1569.725 | 3 | 60.62 | 4.60E-06 | SYPFKYSPLYFGK | Phospho (ST) | 0.0000001000000.0 | Synth_pep_425V.978.978.3.dta               |
| GPSGVXSQAQLXR | [2 1 8 0] | 437  | 1 | 697.8192 | 1393.624 | 2 | 60.19 | 4.50E-06 | GPSGVVDAQLVR  | Phospho (ST) | 0.0000001000000.0 | Synth_pep_325V.817.817.2.dta               |
| GPSGVXSQAQLXR | [9 9 3 0] | 1987 | 1 | 762.8475 | 1523.68  | 2 | 61.77 | 4.50E-06 | GPSGLVSAQLFR  | Phospho (ST) | 0.0000001000000.0 | Synth_pep_325V.1249.1249.2.dta             |
| GPSGVXSQAQLXR | [5 3 8 1] | 1078 | 1 | 461.5736 | 1381.699 | 3 | 60.86 | 4.40E-06 | GPSGLVSAQLVK  | Phospho (ST) | 0.0000001000000.0 | Synth_pep_40V.1272.1272.3.dta              |
| GPSGVXSQAQLXR | [6 0 0 0] | 121  | 1 | 640.8023 | 1279.59  | 2 | 60.79 | 4.40E-06 | GPSGVVSAQLAR  | Phospho (ST) | 0.0000001000000.0 | Synth_pep_35V.747.747.2.dta                |
| SXPFKXSPLXFG  | [6 3 0 1] | 1262 | 1 | 498.2466 | 1491.718 | 3 | 61.85 | 4.30E-06 | SDPFKYSPLAFGK | Phospho (ST) | 0.0000001000000.0 | Synth_pep_375V.1130.1130.3.dta             |
| SXPFKXSPLXFG  | [6 5 2 1] | 1306 | 1 | 506.2538 | 1515.74  | 3 | 59.77 | 4.30E-06 | SDPFKYSPLFFGK | Phospho (ST) | 0.0000001000000.0 | Synth_pep_375V.1097.1097.3.dta             |
| GPSGVXSQAQLXR | [5 3 2 0] | 1065 | 1 | 720.8484 | 1439.682 | 2 | 58.81 | 4.30E-06 | GPSGLVSAQLER  | Phospho (ST) | 0.0000001000000.0 | AIC_synth_test_25.1632.1632.2.dta          |
| GPSGVXSQAQLXR | [5 3 7 0] | 1075 | 1 | 706.8484 | 1411.682 | 2 | 59.38 | 4.20E-06 | GPSGLVSAQLTR  | Phospho (ST) | 0.0000001000000.0 | Synth_pep_325V.1250.1250.2.dta             |
| GPSGVXSQAQLXR | [9 2 5 0] | 1851 | 1 | 728.8456 | 1455.677 | 2 | 58.35 | 4.20E-06 | GPSGVVSEAQLLR | Phospho (ST) | 0.0000001000000.0 | Synth_pep_325V.1058.1058.2.dta             |
| GPSGVXSQAQLXR | [2 8 5 0] | 571  | 1 | 696.8478 | 1391.681 | 2 | 61.24 | 4.10E-06 | GPSGVVSAQLLR  | Phospho (ST) | 0.0000001000000.0 | Synth_pep_35V.1152.1152.2.dta              |
| SXPFKXSPLXFG  | [4 4 0 0] | 881  | 1 | 467.5621 | 1399.665 | 3 | 63.39 | 4.10E-06 | SGPFKYSPLAFGR | Phospho (ST) | 0.0000001000000.0 | Synth_pep_40V.889.889.3.dta                |
| GPSGVXSQAQLXR | [5 9 0 0] | 1181 | 1 | 699.8417 | 1397.669 | 2 | 60.37 | 4.10E-06 | GPSGLVSAQLAR  | Phospho (ST) | 0.0000001000000.0 | Synth_pep_35V.1088.1088.2.dta              |
| GPSGVXSQAQLXR | [0 3 3 0] | 67   | 1 | 708.8347 | 1415.655 | 2 | 63.41 | 4.10E-06 | GPSGVVSAQLFR  | Phospho (ST) | 0.0000001000000.0 | Synth_pep_30V_120502214048.1394.1394.2.dta |
| GPSGVXSQAQLXR | [2 5 2 0] | 505  | 1 | 711.8338 | 1421.653 | 2 | 60.48 | 4.10E-06 | GPSGLVSAQLER  | Phospho (ST) | 0.0000001000000.0 | Synth_pep_30V_120502214048.954.954.2.dta   |
| SXPFKXSPLXFG  | [5 0 5 1] | 1012 | 1 | 495.6019 | 1483.784 | 3 | 57.89 | 3.90E-06 | SLPFKYSPLFFGK | Phospho (ST) | 0.0000001000000.0 | Synth_pep_40V.1121.1121.3.dta              |
| GPSGVXSQAQLXR | [0 0 0 0] | 1    | 1 | 632.8058 | 1263.597 | 2 | 63.15 | 3.90E-06 | GPSGVVSAQLAR  | Phospho (ST) | 0.0000001000000.0 | Synth_pep_35V.792.792.2.dta                |
| GPSGVXSQAQLXR | [4 4 0 1] | 882  | 1 | 604.7882 | 1207.562 | 2 | 54.05 | 3.90E-06 | GPSGVVSAQLAK  | Phospho (ST) | 0.0000001000000.0 | Synth_pep_375V.733.733.2.dta               |
| SXPFKXSPLXFG  | [5 8 9 1] | 1180 | 1 | 521.6061 | 1561.797 | 3 | 56.97 | 3.90E-06 | SLPFKYSPLYFGK | Phospho (ST) | 0.0000001000000.0 | Synth_pep_375V.1160.1160.3.dta             |
| GPSGVXSQAQLXR | [0 2 8 0] | 57   | 1 | 675.8246 | 1349.635 | 2 | 60    | 3.90E-06 | GPSGVVSAQLVR  | Phospho (ST) | 0.0000001000000.0 | Synth_pep_35V.856.856.2.dta                |
| GPSGVXSQAQLXR | [8 0 6 0] | 1613 | 1 | 654.8183 | 1307.622 | 2 | 58.65 | 3.90E-06 | GPSGVVSAQLSR  | Phospho (ST) | 0.0000001000000.0 | Synth_pep_35V.849.849.2.dta                |
| GPSGVXSQAQLXR | [0 9 4 0] | 189  | 1 | 671.8115 | 1341.609 | 2 | 57.37 | 3.80E-06 | GPSGVVSAQLGR  | Phospho (ST) | 0.0000001000000.0 | Synth_pep_375V.856.856.2.dta               |
| GPSGVXSQAQLXR | [0 5 0 0] | 101  | 1 | 653.8291 | 1305.644 | 2 | 54.32 | 3.70E-06 | GPSGVVSAQLAR  | Phospho (ST) | 0.0000001000000.0 | Synth_pep_35V.1059.1059.2.dta              |
| GPSGVXSQAQLXR | [5 4 4 0] | 1089 | 1 | 639.8138 | 1277.613 | 2 | 64.78 | 3.70E-06 | GPSGLVSAQLGR  | Phospho (ST) | 0.0000001000000.0 | Synth_pep_275V.921.921.2.dta               |
| SXPFKXSPLXFG  | [6 9 9 1] | 1400 | 1 | 534.2528 | 1599.737 | 3 | 58.48 | 3.60E-06 | SDPFKYSPLYFGK | Phospho (ST) | 0.0000001000000.0 | Synth_pep_35V.1051.1051.3.dta              |
| GPSGVXSQAQLXR | [8 8 9 0] | 1179 | 1 | 706.8511 | 1411.688 | 2 | 56.2  | 3.60E-06 | GPSGVVSAQLYR  | Phospho (ST) | 0.0000001000000.0 | Synth_pep_325V.1104.1104.2.dta             |
| SXPFKXSPLXFG  | [5 9 9 1] | 1720 | 1 | 526.2794 | 1575.816 | 3 | 54.43 | 3.60E-06 | SLPFKLSPLYFGK | Phospho (ST) | 0.0000001000000.0 | Synth_pep_375V.1241.1241.3.dta             |
| GPSGVXSQAQLXR | [5 5 0 0] | 1111 | 1 | 695.8791 | 1389.744 | 2 | 54.5  | 3.50E-06 | GPSGLVSAQLLR  | Phospho (ST) | 0.0000001000000.0 | AIC_synth_test_25.2055.2055.2.dta          |
| GPSGVXSQAQLXR | [8 5 3 0] | 1707 | 1 | 470.9095 | 1409.707 | 3 | 55.29 | 3.50E-06 | GPSGVVSAQLFR  | Phospho (ST) | 0.0000001000000.0 | Synth_pep_425V.1372.1372.3.dta             |
| SXPFKXSPLXFG  | [2 2 1 0] | 443  | 1 | 530.2386 | 1587.694 | 3 | 58.62 | 3.50E-06 | SEPFKYSPLDFGR | Phospho (ST) | 0.0000001000000.0 | Synth_pep_425V.949.949.3.dta               |
| SXPFKXSPLXFG  | [5 3 3 1] | 1068 | 1 | 532.2732 | 1593.798 | 3 | 56.71 | 3.50E-06 | SLPFKYSPLFFGK | Phospho (ST) | 0.0000001000000.0 | Synth_pep_40V.1319.1319.3.dta              |
| SXPFKXSPLXFG  | [5 3 3 1] | 1068 | 1 | 532.274  | 1593.8   | 3 | 56.72 | 3.50E-06 | SLPFKYSPLFFGK | Phospho (ST) | 0.0000001000000.0 | Synth_pep_425V.1321.                       |

|                           |   |          |          |   |       |          |               |              |                   |                                            |
|---------------------------|---|----------|----------|---|-------|----------|---------------|--------------|-------------------|--------------------------------------------|
| GPSGVXSAQXLR 2 8 8 0 577  | 1 | 689.8403 | 1377.666 | 2 | 60.88 | 2.70E-06 | GPSGEVSAQLVLR | Phospho (ST) | 0.0000001000000.0 | Synth_pep_35V.1019.1019.2.dta              |
| GPSGVXSAQXLR 3 6 9 0 739  | 1 | 724.8314 | 1447.648 | 2 | 64.77 | 2.70E-06 | GPSGVSSAQLYR  | Phospho (ST) | 0.0000001000000.0 | Synth_pep_275V.1078.1078.2.dta             |
| SXPFKXSPLXFR 5 8 3 1 1168 | 1 | 516.2752 | 1545.804 | 3 | 58.31 | 2.70E-06 | SPLPKVSPFLFGK | Phospho (ST) | 0.0000001000000.0 | Synth_pep_375V.1248.1248.3.dta             |
| SXPFKXSPLXFR 5 5 5 1 1112 | 1 | 509.618  | 1525.832 | 3 | 55.9  | 2.60E-06 | SPLPKSPLFFGK  | Phospho (ST) | 0.0000001000000.0 | Synth_pep_425V.1299.1299.3.dta             |
| SXPFKXSPLXFR 6 5 9 1 1320 | 1 | 517.5933 | 1549.758 | 3 | 62.12 | 2.60E-06 | SPPKKSPLVFGK  | Phospho (ST) | 0.0000001000000.0 | Synth_pep_40V.1119.1119.3.dta              |
| GPSGVXSAQXLR 0 4 8 0 97   | 1 | 639.8129 | 1277.611 | 2 | 66.44 | 2.60E-06 | GPSGVSSAQLVLR | Phospho (ST) | 0.0000001000000.0 | Synth_pep_30V_120502214048.800.800.2.dta   |
| SXPFKXSPLXFR 1 8 5 1 372  | 1 | 505.5945 | 1513.762 | 3 | 62.99 | 2.60E-06 | SPPKKSPLVFGK  | Phospho (ST) | 0.0000001000000.0 | AIC_synth_45.1517.1517.3.dta               |
| GPSGVXSAQXLR 0 2 6 0 53   | 1 | 669.8062 | 1337.598 | 2 | 62.73 | 2.60E-06 | GPSGVSEAQLSR  | Phospho (ST) | 0.0000001000000.0 | Synth_pep_375V.752.752.2.dta               |
| GPSGVXSAQXLR 5 3 5 1 1072 | 1 | 466.2461 | 1395.716 | 3 | 60.7  | 2.50E-06 | GPSGLVSAQLLK  | Phospho (ST) | 0.0000001000000.0 | Synth_pep_425V.1377.1377.3.dta             |
| GPSGVXSAQXLR 0 0 0 0 1    | 1 | 632.8063 | 1263.598 | 2 | 65.06 | 2.50E-06 | GPSGVSSAQLAR  | Phospho (ST) | 0.0000001000000.0 | Synth_pep_325V.793.793.2.dta               |
| GPSGVXSAQXLR 9 1 7 0 1835 | 1 | 715.8192 | 1429.624 | 2 | 63.88 | 2.50E-06 | GPSGVSDAQLTR  | Phospho (ST) | 0.0000001000000.0 | Synth_pep_35V.1129.1129.2.dta              |
| SXPFKXSPLXFR 8 8 9 1 1780 | 1 | 516.9334 | 1547.778 | 3 | 60.96 | 2.50E-06 | SVPKKSPLVFGK  | Phospho (ST) | 0.0000001000000.0 | Synth_pep_35V.1111.1115.3.dta              |
| SXPFKXSPLXFR 5 8 9 0 1179 | 1 | 530.9415 | 1589.803 | 3 | 56.84 | 2.50E-06 | SPLPKVSPVFGK  | Phospho (ST) | 0.0000001000000.0 | Synth_pep_425V.1170.1170.3.dta             |
| SXPFKXSPLXFR 6 8 8 1 1378 | 1 | 491.5903 | 1471.749 | 3 | 61.35 | 2.50E-06 | SPPKKSPLVFGK  | Phospho (ST) | 0.0000001000000.0 | Synth_pep_375V.1056.1056.3.dta             |
| SXPFKXSPLXFR 3 0 0 1 602  | 1 | 492.9139 | 1475.72  | 3 | 56.79 | 2.50E-06 | SFPKKSPLAFGK  | Phospho (ST) | 0.0000001000000.0 | Synth_pep_40V.1072.1072.3.dta              |
| GPSGVXSAQXLR 3 0 0 0 661  | 1 | 708.8375 | 1415.661 | 2 | 63.15 | 2.50E-06 | GPSGVSSAQLAR  | Phospho (ST) | 0.0000001000000.0 | Synth_pep_275V.1380.1380.2.dta             |
| SXPFKXSPLXFR 3 8 9 1 780  | 1 | 532.9346 | 1595.782 | 3 | 57.73 | 2.50E-06 | SPPKKSPLVFGK  | Phospho (ST) | 0.0000001000000.0 | Synth_pep_425V.1195.1195.3.dta             |
| GPSGVXSAQXLR 0 9 3 0 187  | 1 | 716.835  | 1431.655 | 2 | 63.17 | 2.50E-06 | GPSGVSSAQLFR  | Phospho (ST) | 0.0000001000000.0 | Synth_pep_35V.1161.1161.2.dta              |
| GPSGVXSAQXLR 1 8 1 0 363  | 1 | 690.8132 | 1379.612 | 2 | 66.55 | 2.50E-06 | GPSGDVSAQLDR  | Phospho (ST) | 0.0000001000000.0 | AIC_synth_test_25.992.992.2.dta            |
| SXPFKXSPLXFR 6 5 9 1 1320 | 1 | 517.5934 | 1549.758 | 3 | 62.37 | 2.40E-06 | SPPKKSPLVFGK  | Phospho (ST) | 0.0000001000000.0 | Synth_pep_35V.1145.1145.3.dta              |
| GPSGVXSAQXLR 5 5 0 0 1101 | 1 | 674.853  | 1347.692 | 2 | 56.16 | 2.40E-06 | GPSGLVSAQLAR  | Phospho (ST) | 0.0000001000000.0 | Synth_pep_35V.1218.1218.2.dta              |
| GPSGVXSAQXLR 1 8 0 0 361  | 1 | 668.8163 | 1335.618 | 2 | 61.98 | 2.40E-06 | GPSGDVSAQLAR  | Phospho (ST) | 0.0000001000000.0 | Synth_pep_375V.883.883.2.dta               |
| GPSGVXSAQXLR 5 9 1 0 1183 | 1 | 721.838  | 1441.661 | 2 | 62.48 | 2.40E-06 | GPSGLVSAQLDR  | Phospho (ST) | 0.0000001000000.0 | Synth_pep_275V.1128.1128.2.dta             |
| GPSGVXSAQXLR 5 2 2 0 1045 | 1 | 711.8353 | 1421.656 | 2 | 66.62 | 2.40E-06 | GPSGLVSEAQLER | Phospho (ST) | 0.0000001000000.0 | Synth_pep_275V.986.986.2.dta               |
| GPSGVXSAQXLR 5 7 5 0 1151 | 1 | 689.8597 | 1377.705 | 2 | 62.04 | 2.40E-06 | GPSGLVSTAQLLR | Phospho (ST) | 0.0000001000000.0 | Synth_pep_275V.1233.1233.2.dta             |
| GPSGVXSAQXLR 9 8 2 0 1965 | 1 | 721.8383 | 1441.662 | 2 | 62.47 | 2.40E-06 | GPSGVSSAQLER  | Phospho (ST) | 0.0000001000000.0 | Synth_pep_275V.1042.1042.2.dta             |
| SXPFKXSPLXFR 5 5 0 0 1101 | 1 | 504.9378 | 1511.792 | 3 | 56.43 | 2.30E-06 | SPLPKSPLAFGR  | Phospho (ST) | 0.0000001000000.0 | AIC_synth_45.1572.1572.3.dta               |
| GPSGVXSAQXLR 8 8 3 0 1767 | 1 | 698.8526 | 1395.691 | 2 | 56.46 | 2.30E-06 | GPSGVSSAQLFR  | Phospho (ST) | 0.0000001000000.0 | Synth_pep_425V.1443.1443.2.dta             |
| GPSGVXSAQXLR 3 3 9 0 679  | 1 | 754.8513 | 1507.688 | 2 | 62.46 | 2.30E-06 | GPSGVSSAQLFR  | Phospho (ST) | 0.0000001000000.0 | Synth_pep_275V.1432.1432.2.dta             |
| GPSGVXSAQXLR 3 5 3 0 707  | 1 | 729.8618 | 1457.709 | 2 | 60.39 | 2.30E-06 | GPSGLVSAQLFR  | Phospho (ST) | 0.0000001000000.0 | Synth_pep_275V.1648.1648.2.dta             |
| GPSGVXSAQXLR 8 0 1 0 1603 | 1 | 668.8153 | 1335.616 | 2 | 62.79 | 2.30E-06 | GPSGVSSAQLDR  | Phospho (ST) | 0.0000001000000.0 | Synth_pep_30V_120502214048.866.866.2.dta   |
| SXPFKXSPLXFR 0 0 3 1 8    | 1 | 492.9149 | 1475.723 | 3 | 57.19 | 2.30E-06 | SAPKKSPLFFGK  | Phospho (ST) | 0.0000001000000.0 | Synth_pep_375V.1040.1040.3.dta             |
| SXPFKXSPLXFR 2 9 2 1 586  | 1 | 536.9158 | 1607.726 | 3 | 59.52 | 2.00E-06 | SEPKKSPLEFGK  | Phospho (ST) | 0.0000001000000.0 | Synth_pep_40V.1000.1000.3.dta              |
| GPSGVXSAQXLR 9 8 5 1 1972 | 1 | 466.9053 | 1397.694 | 3 | 63.48 | 2.20E-06 | GPSGVSSAQLLK  | Phospho (ST) | 0.0000001000000.0 | Synth_pep_40V.1196.1196.3.dta              |
| GPSGVXSAQXLR 4 8 4 0 969  | 1 | 632.8063 | 1263.598 | 2 | 65.64 | 2.20E-06 | GPSGVSSAQLGR  | Phospho (ST) | 0.0000001000000.0 | Synth_pep_275V.827.827.2.dta               |
| GPSGVXSAQXLR 5 8 0 0 1117 | 1 | 459.5811 | 1375.722 | 3 | 57    | 2.10E-06 | GPSGLVSAQLVLR | Phospho (ST) | 0.0000001000000.0 | AIC_synth_45.1716.1716.3.dta               |
| GPSGVXSAQXLR 5 8 5 1 1172 | 1 | 450.2454 | 1347.714 | 3 | 61.47 | 2.10E-06 | GPSGLVSAQLLK  | Phospho (ST) | 0.0000001000000.0 | Synth_pep_40V.1279.1279.3.dta              |
| GPSGVXSAQXLR 0 4 0 1 82   | 1 | 611.7959 | 1221.577 | 2 | 56.79 | 2.10E-06 | GPSGVSSAQLAK  | Phospho (ST) | 0.0000001000000.0 | Synth_pep_35V.737.737.2.dta                |
| GPSGVXSAQXLR 5 3 7 0 1075 | 1 | 706.8484 | 1411.682 | 2 | 62.33 | 2.10E-06 | GPSGLVSAQLTR  | Phospho (ST) | 0.0000001000000.0 | Synth_pep_30V_120502214048.1281.1281.2.dta |
| GPSGVXSAQXLR 8 7 1 0 1743 | 1 | 683.8187 | 1365.623 | 2 | 64.71 | 2.10E-06 | GPSGVSSAQLDR  | Phospho (ST) | 0.0000001000000.0 | Synth_pep_275V.856.856.2.dta               |
| GPSGVXSAQXLR 5 5 3 0 1107 | 1 | 712.8676 | 1423.721 | 2 | 60.47 | 2.00E-06 | GPSGLVSAQLFR  | Phospho (ST) | 0.0000001000000.0 | Synth_pep_30V_120502214048.1552.1552.2.dta |
| SXPFKXSPLXFR 5 0 5 1 1012 | 1 | 495.6025 | 1483.786 | 3 | 59.83 | 2.00E-06 | SPLPKSPLFFGK  | Phospho (ST) | 0.0000001000000.0 | Synth_pep_375V.1131.1131.3.dta             |
| GPSGVXSAQXLR 2 1 2 0 425  | 1 | 712.8039 | 1423.593 | 2 | 63.95 | 2.00E-06 | GPSGLVSDAQLER | Phospho (ST) | 0.0000001000000.0 | Synth_pep_30V_120502214048.745.745.2.dta   |
| GPSGVXSAQXLR 4 5 4 1 910  | 1 | 625.8105 | 1249.606 | 2 | 58.2  | 2.00E-06 | GPSGLVSAQLGK  | Phospho (ST) | 0.0000001000000.0 | Synth_pep_275V.988.988.2.dta               |
| GPSGVXSAQXLR 2 2 2 0 445  | 1 | 480.2109 | 1437.611 | 3 | 64.59 | 2.00E-06 | GPSGVSEAQLER  | Phospho (ST) | 0.0000001000000.0 | Synth_pep_425V.764.764.3.dta               |
| GPSGVXSAQXLR 0 9 0 0 181  | 1 | 678.8191 | 1355.624 | 2 | 60.5  | 2.00E-06 | GPSGVSSAQLAR  | Phospho (ST) | 0.0000001000000.0 | Synth_pep_35V.896.896.2.dta                |
| GPSGVXSAQXLR 1 9 7 0 395  | 1 | 715.8164 | 1429.618 | 2 | 62.74 | 2.00E-06 | GPSGDVSAQLTR  | Phospho (ST) | 0.0000001000000.0 | Synth_pep_30V_120502214048.882.882.2.dta   |
| GPSGVXSAQXLR 3 7 5 0 751  | 1 | 706.8488 | 1411.683 | 2 | 62.55 | 2.00E-06 | GPSGVSTAQLLR  | Phospho (ST) | 0.0000001000000.0 | Synth_pep_30V_120502214048.1200.1200.2.dta |
| GPSGVXSAQXLR 2 9 9 0 599  | 1 | 753.834  | 1505.654 | 2 | 63.36 | 2.00E-06 | GPSGVSSAQLFR  | Phospho (ST) | 0.0000001000000.0 | Synth_pep_325V.972.972.2.dta               |
| GPSGVXSAQXLR 6 1 7 0 1235 | 1 | 677.8024 | 1353.59  | 2 | 59.96 | 2.00E-06 | GPSGLVSDAQLTR | Phospho (ST) | 0.0000001000000.0 | Synth_pep_40V.731.731.2.dta                |
| GPSGVXSAQXLR 1 9 2 1 386  | 1 | 715.8164 | 1429.618 | 2 | 62.74 | 2.00E-06 | GPSGDVSAQLER  | Phospho (ST) | 0.0000001000000.0 | Synth_pep_30V_120502214048.882.882.2.dta   |
| GPSGVXSAQXLR 5 1 5 0 1031 | 1 | 696.8469 | 1391.679 | 2 | 63.46 | 1.90E-06 | GPSGLVSDAQLER | Phospho (ST) | 0.0000001000000.0 | Synth_pep_30V_120502214048.1152.1152.2.dta |
| GPSGVXSAQXLR 5 5 7 0 1115 | 1 | 689.859  | 1377.704 | 2 | 63.03 | 1.90E-06 | GPSGLVSAQLTR  | Phospho (ST) | 0.0000001000000.0 | Synth_pep_325V.1240.1240.2.dta             |
| GPSGVXSAQXLR 1 1 9 0 239  | 1 | 722.8068 | 1443.599 | 2 | 60.22 | 1.90E-06 | GPSGDVSDAQLYR | Phospho (ST) | 0.0000001000000.0 | Synth_pep_30V_120502214048.817.817.2.dta   |
| SXPFKXSPLXFR 4 5 9 1 920  | 1 | 507.5898 | 1519.748 | 3 | 64.39 | 1.90E-06 | SPPKKSPLVFGK  | Phospho (ST) | 0.0000001000000.0 | Synth_pep_40V.1111.1111.3.dta              |
| GPSGVXSAQXLR 2 1 6 0 433  | 1 | 691.8019 | 1381.589 | 2 | 63.88 | 1.90E-06 | GPSGVSSAQLSR  | Phospho (ST) | 0.0000001000000.0 | Synth_pep_375V.730.730.2.dta               |
| GPSGVXSAQXLR 5 8 4 0 1169 | 1 | 660.8376 | 1319.661 | 2 | 59.38 | 1.90E-06 | GPSGLVSSAQLGR | Phospho (ST) | 0.0000001000000.0 | Synth_pep_275V.1141.1141.2.dta             |
| GPSGVXSAQXLR 8 2 7 0 1655 | 1 | 690.8301 | 1379.646 | 2 | 63.87 | 1.90E-06 | GPSGVSEAQLTR  | Phospho (ST) | 0.0000001000000.0 | Synth_pep_375V.861.861.2.dta               |
| SXPFKXSPLXFR 0 9 9 1 20   | 1 | 498.2455 | 1491.715 | 3 | 65.59 | 1.80E-06 | SAPKKSPLVFGK  | Phospho (ST) | 0.0000001000000.0 | Synth_pep_40V.935.935.3.dta                |
| SXPFKXSPLXFR 7 9 9 1 1600 | 1 | 538.9243 | 1613.751 | 3 | 58.01 | 1.70E-06 | SPPKKSPLVFGK  | Phospho (ST) | 0.0000001000000.0 | Synth_pep_40V.1015.1015.3.dta              |
| GPSGVXSAQXLR 5 9 5 1 1192 | 1 | 471.5778 | 1411.712 | 3 | 63.77 | 1.70E-06 | GPSGLVSSAQLLK | Phospho (ST) | 0.0000001000000.0 | Synth_pep_375V.1234.1234.3.dta             |
| SXPFKXSPLXFR 6 3 0 1 1262 | 1 | 498.2458 | 1491.715 | 3 | 65.8  | 1.70E-06 | SPPKKSPLAFGK  | Phospho (ST) | 0.0000001000000.0 | Synth_pep_40V.1116.1116.3.dta              |
| GPSGVXSAQXLR 5 8 1 0 1163 | 1 | 689.8394 | 1377.664 | 2 | 62.08 | 1.70E-06 | GPSGLVSSAQLDR | Phospho (ST) | 0.0000001000000.0 | Synth_pep_30V_120502214048.1098.1098.2.dta |
| SXPFKXSPLXFR 4 6 2 1 926  | 1 | 487.5647 | 1459.672 | 3 | 64.9  | 1.70E-06 | SPPKKSPLFFGK  | Phospho (ST) | 0.0000001000000.0 | Synth_pep_425V.878.878.3.dta               |
| GPSGVXSAQXLR 9 4 0 0 1881 | 1 | 448.2094 | 1341.606 | 3 | 64.04 | 1.70E-06 | GPSGVSSAQLAR  | Phospho (ST) | 0.0000001000000.0 | Synth_pep_425V.806.806.3.dta               |
| SXPFKXSPLXFR 4 2 0 1 842  | 1 | 482.2337 | 1443.679 | 3 | 65.33 | 1.70E-06 | SPPKKSPLAFGK  | Phospho (ST) | 0.0000001000000.0 | Synth_pep_40V.888.888.3.dta                |
| GPSGVXSAQXLR 8 8 4 0 1769 | 1 | 653.8311 | 1305.648 | 2 | 58.09 | 1.60E-06 | GPSGDVSSAQLGR | Phospho (ST) | 0.0000001000000.0 | AIC_synth_test_25.1202.1202.2.dta          |
| SXPFKXSPLXFR 5 8 0 0 1161 | 1 | 500.2656 | 1497.775 | 3 | 59.25 | 1.60E-06 | SPLPKSPLAFGR  | Phospho (ST) | 0.0000001000000.0 | Synth_pep_425V.1137.1137.3.dta             |
| GPSGVXSAQXLR 5 9 5 0 1191 | 1 | 720.8654 | 1439.716 | 2 | 60.13 | 1.50E-06 | GPSGLVSAQLLR  | Phospho (ST) | 0.0000001000000.0 | Synth_pep_30V_120502214048.1345.1345.2.dta |
| SXPFKXSPLXFR 6 5 0 1 1302 | 1 | 486.9179 | 1457.732 | 3 | 65.37 | 1.50E-06 | SPPKKSPLAFGK  | Phospho (ST) | 0.0000001000000.0 | Synth_pep_425V.1083.1083.3.dta             |
| SXPFKXSPLXFR 4 6 0 1 922  | 1 | 468.2302 | 1401.669 | 3 | 67.17 | 1.50E-06 | SPPKKSPLAFGK  | Phospho (ST) | 0.0000001000000.0 | Synth_pep_35V.881.881.3.dta                |
| SXPFKXSPLXFR 9 9 9 1 2000 | 1 | 559.5968 | 1675.769 | 3 | 60.88 | 1.50E-06 | SPPKKSPLVFGK  | Phospho (ST) | 0.0000001000000.0 | Synth_pep_425V.1073.1073.3.dta             |
| GPSGVXSAQXLR 3 3 5 0 671  | 1 | 729.86   | 1457.706 | 2 | 61.93 | 1.50E-06 | GPSGVSSAQLLR  | Phospho (ST) | 0.0000001000000.0 | Synth_pep_325V.1448.1448.2.dta             |
| SXPFKXSPLXFR 6 3 3 1 1268 | 1 | 523.5893 | 1567.746 | 3 | 62.44 | 1.50E-06 | SPPKKSPLFFGK  | Phospho (ST) | 0.0000001000000.0 | Synth_pep_40V.1047.1047.3.dta              |
| GPSGVXSAQXLR 3 0 9 0 619  | 1 | 716.8335 | 1431.652 | 2 | 66.82 | 1.50E-06 | GPSGVSSAQLFR  | Phospho (ST) | 0.0000001000000.0 | Synth_pep_325V.1136.1136.2.dta             |
| GPSGVXSAQXLR 8 9 3 0 1787 | 1 | 730.8479 | 1459.681 | 2 | 67.55 | 1.50E-06 | GPSGVSSAQLFR  | Phospho (ST) | 0.0000001000000.0 | Synth_pep_30V_120502214048.1306.1306.2.dta |
| SXPFKXSPLXFR 5 5 1 1 1104 | 1 | 510.2652 | 1527.774 | 3 | 64.69 | 1.50E-06 | S             |              |                   |                                            |

|                           |   |          |          |     |       |          |               |              |                   |                                            |
|---------------------------|---|----------|----------|-----|-------|----------|---------------|--------------|-------------------|--------------------------------------------|
| GPSGVXSAQLXR 4 4 9 0 899  | 1 | 664.8042 | 1327.594 | 2   | 65.17 | 1.20E-06 | GPSGVVGAQLYR  | Phospho (ST) | 0.0000001000000.0 | Synth_pep_275V.834.834.2.dta               |
| GPSGVXSAQLXR 0 5 0 0 111  | 1 | 674.8531 | 1347.692 | 2   | 59.45 | 1.10E-06 | GPSGAVSLAQLLR | Phospho (ST) | 0.0000001000000.0 | Synth_pep_35V.1289.1289.2.dta              |
| GPSGVXSAQLXR 3 3 5 0 671  | 1 | 729.8595 | 1457.704 | 2   | 63.73 | 1.10E-06 | GPSGVFVFAQLLR | Phospho (ST) | 0.0000001000000.0 | Synth_pep_30V_120502214048.1497.1497.2.dta |
| GPSGVXSAQLXR 3 3 5 1 672  | 1 | 477.5739 | 1429.7   | 3   | 67.26 | 1.10E-06 | GPSGVFSAQLLK  | Phospho (ST) | 0.0000001000000.0 | Synth_pep_40V.1385.1385.3.dta              |
| SXPFKXSLXFGR 6 0 9 1 1220 | 1 | 503.5777 | 1507.711 | 3   | 69.1  | 1.10E-06 | SPFKASPLVFGK  | Phospho (ST) | 0.0000001000000.0 | Synth_pep_35V.971.971.3.dta                |
| GPSGVXSAQLXR 5 8 4 0 1169 | 1 | 660.8381 | 1319.662 | 2   | 61.77 | 1.10E-06 | GPSGLVSAQLGR  | Phospho (ST) | 0.0000001000000.0 | AIC_synth_test_25.1376.1376.2.dta          |
| SXPFKXSLXFGR 8 0 3 1 1608 | 1 | 502.2595 | 1503.757 | 3   | 61.95 | 1.10E-06 | SLFKASPLFFGK  | Phospho (ST) | 0.0000001000000.0 | Synth_pep_375V.1090.1090.3.dta             |
| SXPFKXSLXFGR 5 0 0 1 1002 | 1 | 481.5867 | 1441.738 | 3   | 64.79 | 1.10E-06 | SLFKASPLAFGK  | Phospho (ST) | 0.0000001000000.0 | Synth_pep_35V.1043.1043.3.dta              |
| GPSGVXSAQLXR 3 1 6 0 633  | 1 | 700.8127 | 1399.611 | 2   | 67.43 | 1.10E-06 | GPSGVSDAQLSR  | Phospho (ST) | 0.0000001000000.0 | Synth_pep_325V.929.929.2.dta               |
| SXPFKXSLXFGR 0 0 0 1 2    | 1 | 467.5716 | 1399.693 | 3   | 63.52 | 1.10E-06 | SAPFKASPLAFGK | Phospho (ST) | 0.0000001000000.0 | Synth_pep_375V.904.904.3.dta               |
| GPSGVXSAQLXR 8 3 7 0 1675 | 1 | 699.8405 | 1397.667 | 2   | 66.73 | 1.10E-06 | GPSGVFSAQLTR  | Phospho (ST) | 0.0000001000000.0 | Synth_pep_275V.1235.1235.2.dta             |
| GPSGVXSAQLXR 5 5 5 0 1111 | 1 | 695.8772 | 1389.74  | 2   | 62.85 | 1.00E-06 | GPSGLVLAQLLR  | Phospho (ST) | 0.0000001000000.0 | Synth_pep_275V.1585.1585.2.dta             |
| SXPFKXSLXFGR 4 0 0 1 802  | 1 | 462.8985 | 1385.674 | 3   | 66.59 | 1.00E-06 | SGPKASPLAFGK  | Phospho (ST) | 0.0000001000000.0 | Synth_pep_35V.923.923.3.dta                |
| SXPFKXSLXFGR 4 0 3 1 808  | 1 | 488.2421 | 1461.705 | 3   | 62.02 | 1.00E-06 | SGPKASPLFFGK  | Phospho (ST) | 0.0000001000000.0 | Synth_pep_40V.1032.1032.3.dta              |
| SXPFKXSLXFGR 6 0 0 1 1202 | 1 | 472.9023 | 1415.685 | 3   | 68.91 | 1.00E-06 | SPFKASPLAFGK  | Phospho (ST) | 0.0000001000000.0 | Synth_pep_35V.922.922.3.dta                |
| GPSGVXSAQLXR 5 9 1 0 1183 | 1 | 721.8369 | 1441.659 | 2   | 66.93 | 1.00E-06 | GPSGLVSAQLDR  | Phospho (ST) | 0.0000001000000.0 | Synth_pep_30V_120502214048.1081.1081.2.dta |
| GPSGVXSAQLXR 3 3 9 0 679  | 1 | 754.8489 | 1507.683 | 2   | 69.03 | 9.90E-07 | GPSGVFSAQLYR  | Phospho (ST) | 0.0000001000000.0 | Synth_pep_30V_120502214048.1353.1353.2.dta |
| GPSGVXSAQLXR 9 9 9 0 1999 | 1 | 770.8449 | 1539.675 | 2   | 66.56 | 9.90E-07 | GPSGVVSAQLYR  | Phospho (ST) | 0.0000001000000.0 | Synth_pep_325V.1060.1060.2.dta             |
| GPSGVXSAQLXR 5 5 5 1 1112 | 1 | 454.9179 | 1361.732 | 3   | 63.72 | 9.60E-07 | GPSGLVLAQLLK  | Phospho (ST) | 0.0000001000000.0 | Synth_pep_425V.1385.1385.3.dta             |
| GPSGVXSAQLXR 5 5 7 0 1115 | 1 | 689.8571 | 1377.7   | 2   | 67.6  | 9.60E-07 | GPSGLVLAQLTR  | Phospho (ST) | 0.0000001000000.0 | Synth_pep_30V_120502214048.1273.1273.2.dta |
| SXPFKXSLXFGR 4 6 2 1 926  | 1 | 487.5655 | 1459.675 | 3   | 67.66 | 9.30E-07 | SGPKASPLFFGK  | Phospho (ST) | 0.0000001000000.0 | Synth_pep_40V.879.879.3.dta                |
| SXPFKXSLXFGR 6 5 0 1 1302 | 1 | 486.9184 | 1457.733 | 3   | 67.73 | 9.20E-07 | SLFKASPLAFGK  | Phospho (ST) | 0.0000001000000.0 | Synth_pep_375V.1088.1088.3.dta             |
| SXPFKXSLXFGR 0 9 9 1 200  | 1 | 528.9205 | 1583.74  | 3   | 66.42 | 9.20E-07 | SAPFKXSLYFGK  | Phospho (ST) | 0.0000001000000.0 | Synth_pep_40V.1009.1009.3.dta              |
| GPSGVXSAQLXR 6 5 3 0 1307 | 1 | 699.8423 | 1397.67  | 2   | 66.9  | 9.20E-07 | GPSGVVSAQLFR  | Phospho (ST) | 0.0000001000000.0 | Synth_pep_275V.1416.1416.2.dta             |
| SXPFKXSLXFGR 5 3 3 1 1108 | 1 | 520.9454 | 1559.815 | 3   | 60.43 | 9.10E-07 | SLFKASPLFFGK  | Phospho (ST) | 0.0000001000000.0 | Synth_pep_40V.1311.1311.3.dta              |
| SXPFKXSLXFGR 5 5 3 1 1108 | 1 | 520.9464 | 1559.817 | 3   | 60.4  | 9.10E-07 | SLFKASPLFFGK  | Phospho (ST) | 0.0000001000000.0 | Synth_pep_375V.1320.1320.3.dta             |
| SXPFKXSLXFGR 5 0 3 1 1008 | 1 | 506.9308 | 1517.771 | 3   | 61.77 | 9.00E-07 | SLFKASPLFFGK  | Phospho (ST) | 0.0000001000000.0 | Synth_pep_375V.1161.1161.3.dta             |
| GPSGVXSAQLXR 5 2 5 0 1051 | 1 | 703.8557 | 1405.697 | 2   | 69.08 | 8.90E-07 | GPSGLVSEAQLLR | Phospho (ST) | 0.0000001000000.0 | Synth_pep_325V.1151.1151.2.dta             |
| GPSGVXSAQLXR 5 8 7 0 1175 | 1 | 682.8503 | 1363.866 | 2   | 66.3  | 8.90E-07 | GPSGLVSAQLLR  | Phospho (ST) | 0.0000001000000.0 | Synth_pep_325V.1113.1113.2.dta             |
| GPSGVXSAQLXR 5 8 5 0 1171 | 1 | 688.868  | 1375.722 | 2   | 60.86 | 8.60E-07 | GPSGVVSAQLTR  | Phospho (ST) | 0.0000001000000.0 | Synth_pep_30V_120502214048.1458.1458.2.dta |
| SXPFKXSLXFGR 5 5 0 1 1102 | 1 | 495.6028 | 1483.787 | 3   | 63.56 | 8.60E-07 | SLFKASPLAFGK  | Phospho (ST) | 0.0000001000000.0 | Synth_pep_375V.1200.1200.3.dta             |
| SXPFKXSLXFGR 5 8 1 0 1163 | 1 | 514.9287 | 1541.764 | 3   | 67.64 | 8.20E-07 | SLFKASPLDFGR  | Phospho (ST) | 0.0000001000000.0 | Synth_pep_40V.1159.1159.3.dta              |
| GPSGVXSAQLXR 9 9 9 0 1999 | 1 | 770.8437 | 1539.673 | 2   | 66.43 | 8.20E-07 | GPSGVVSAQLYR  | Phospho (ST) | 0.0000001000000.0 | Synth_pep_30V_120502214048.1080.1080.2.dta |
| GPSGVXSAQLXR 8 1 0 0 1621 | 1 | 668.8164 | 1335.618 | 2   | 66.59 | 8.20E-07 | GPSGVVSAQLAR  | Phospho (ST) | 0.0000001000000.0 | Synth_pep_325V.833.833.2.dta               |
| GPSGVXSAQLXR 5 4 5 0 1091 | 1 | 667.8454 | 1333.676 | 2   | 63.8  | 8.10E-07 | GPSGLVSAQLLR  | Phospho (ST) | 0.0000001000000.0 | Synth_pep_275V.1160.1160.2.dta             |
| SXPFKXSLXFGR 4 6 0 1 922  | 1 | 468.2301 | 1401.668 | 3   | 69.99 | 8.10E-07 | SGPKASPLAFGK  | Phospho (ST) | 0.0000001000000.0 | Synth_pep_40V.863.863.3.dta                |
| GPSGVXSAQLXR 8 4 1 0 1683 | 1 | 661.8094 | 1321.604 | 2   | 65.38 | 8.00E-07 | GPSGVVGAQLDR  | Phospho (ST) | 0.0000001000000.0 | Synth_pep_275V.826.826.2.dta               |
| SXPFKXSLXFGR 5 5 0 0 1101 | 1 | 504.9375 | 1511.791 | 3   | 61.05 | 7.90E-07 | SLFKASPLAFGR  | Phospho (ST) | 0.0000001000000.0 | Synth_pep_425V.1209.1209.3.dta             |
| GPSGVXSAQLXR 0 4 0 0 81   | 1 | 625.7983 | 1249.582 | 2   | 68    | 7.80E-07 | GPSGAVGAQLAR  | Phospho (ST) | 0.0000001000000.0 | Synth_pep_375V.739.739.2.dta               |
| GPSGVXSAQLXR 6 5 5 0 1391 | 1 | 707.8384 | 1413.662 | 2   | 67.47 | 7.80E-07 | GPSGVVSAQLLR  | Phospho (ST) | 0.0000001000000.0 | Synth_pep_35V.1072.1072.2.dta              |
| GPSGVXSAQLXR 9 4 9 0 1899 | 1 | 717.8242 | 1433.634 | 2   | 70.08 | 7.80E-07 | GPSGVVGAQLYR  | Phospho (ST) | 0.0000001000000.0 | Synth_pep_325V.961.961.2.dta               |
| GPSGVXSAQLXR 9 8 5 0 1971 | 1 | 476.2404 | 1425.7   | 3   | 67.47 | 7.70E-07 | GPSGVVSAQLLR  | Phospho (ST) | 0.0000001000000.0 | Synth_pep_40V.1205.1205.3.dta              |
| GPSGVXSAQLXR 5 3 5 0 1071 | 1 | 712.8688 | 1423.723 | 2   | 61.26 | 7.50E-07 | GPSGLVSAQLLR  | Phospho (ST) | 0.0000001000000.0 | Synth_pep_275V.1576.1576.2.dta             |
| GPSGVXSAQLXR 2 3 8 0 477  | 1 | 713.8397 | 1425.665 | 2   | 66.63 | 7.50E-07 | GPSGVFSAQLYR  | Phospho (ST) | 0.0000001000000.0 | Synth_pep_325V.1163.1163.2.dta             |
| GPSGVXSAQLXR 9 5 5 0 1911 | 1 | 720.865  | 1439.715 | 2   | 67.22 | 7.40E-07 | GPSGLVSAQLLR  | Phospho (ST) | 0.0000001000000.0 | Synth_pep_30V_120502214048.1417.1417.2.dta |
| GPSGVXSAQLXR 5 8 0 0 1161 | 1 | 667.8444 | 1333.674 | 2   | 62.68 | 7.30E-07 | GPSGLVSAQLAR  | Phospho (ST) | 0.0000001000000.0 | Synth_pep_30V_120502214048.1136.1136.2.dta |
| GPSGVXSAQLXR 2 2 2 0 445  | 1 | 719.8126 | 1437.611 | 2   | 69.09 | 7.20E-07 | GPSGVSEAQLLR  | Phospho (ST) | 0.0000001000000.0 | Synth_pep_30V_120502214048.763.763.2.dta   |
| SXPFKXSLXFGR 0 0 0 0 1    | 1 | 476.906  | 1427.696 | 3   | 69.5  | 7.20E-07 | SAPFKASPLAFGR | Phospho (ST) | 0.0000001000000.0 | AIC_synth_45.1060.1060.3.dta               |
| SXPFKXSLXFGR 8 5 0 1 1702 | 1 | 490.9303 | 1469.769 | 3   | 67.12 | 7.00E-07 | SVFKASPLAFGK  | Phospho (ST) | 0.0000001000000.0 | Synth_pep_425V.1121.1121.3.dta             |
| GPSGVXSAQLXR 5 5 8 0 1117 | 1 | 688.8692 | 1375.724 | 2   | 65.16 | 6.90E-07 | GPSGLVLAQLYR  | Phospho (ST) | 0.0000001000000.0 | Synth_pep_325V.1336.1336.2.dta             |
| GPSGVXSAQLXR 5 8 1 0 1163 | 1 | 689.8405 | 1377.667 | 2   | 66.84 | 6.90E-07 | GPSGLVSAQLDR  | Phospho (ST) | 0.0000001000000.0 | Synth_pep_275V.1136.1136.2.dta             |
| SXPFKXSLXFGR 5 8 1 0 1163 | 1 | 514.9289 | 1541.765 | 3   | 68.46 | 6.80E-07 | SLFKASPLDFGR  | Phospho (ST) | 0.0000001000000.0 | Synth_pep_425V.1165.1165.3.dta             |
| SXPFKXSLXFGR 0 9 0 1 182  | 1 | 498.2458 | 1491.715 | 3   | 69.89 | 6.80E-07 | SAPFKASPLAFGK | Phospho (ST) | 0.0000001000000.0 | Synth_pep_425V.977.977.3.dta               |
| SXPFKXSLXFGR 6 5 9 1 1320 | 1 | 517.5938 | 1549.76  | 3   | 68.1  | 6.50E-07 | SPFKASPLVFGK  | Phospho (ST) | 0.0000001000000.0 | Synth_pep_375V.1128.1128.3.dta             |
| SXPFKXSLXFGR 2 4 2 1 486  | 1 | 501.5689 | 1501.685 | 3   | 69.25 | 6.50E-07 | SEPKKASPLFFGK | Phospho (ST) | 0.0000001000000.0 | Synth_pep_40V.880.880.3.dta                |
| GPSGVXSAQLXR 8 8 4 0 1769 | 1 | 653.8292 | 1305.644 | 2   | 61.89 | 6.50E-07 | GPSGVVSAQLGR  | Phospho (ST) | 0.0000001000000.0 | Synth_pep_275V.1019.1019.2.dta             |
| GPSGVXSAQLXR 1 1 9 0 239  | 1 | 722.8087 | 1443.603 | 2   | 67.47 | 6.40E-07 | GPSGVVDAQLYR  | Phospho (ST) | 0.0000001000000.0 | Synth_pep_275V.849.849.2.dta               |
| GPSGVXSAQLXR 5 5 4 0 1109 | 1 | 667.8453 | 1333.676 | 2   | 64.89 | 6.30E-07 | GPSGLVLAQLGR  | Phospho (ST) | 0.0000001000000.0 | Synth_pep_275V.1290.1290.2.dta             |
| GPSGVXSAQLXR 8 8 5 0 1771 | 1 | 681.86   | 1361.706 | 2   | 62.11 | 6.20E-07 | GPSGVVSAQLLR  | Phospho (ST) | 0.0000001000000.0 | Synth_pep_325V.1289.1289.2.dta             |
| SXPFKXSLXFGR 6 9 3 1 1388 | 1 | 528.9216 | 1583.743 | 3   | 68.47 | 6.20E-07 | SPFKASPLFFGK  | Phospho (ST) | 0.0000001000000.0 | Synth_pep_375V.1125.1125.3.dta             |
| GPSGVXSAQLXR 9 4 4 0 1889 | 1 | 664.8033 | 1327.592 | 2   | 68.15 | 6.20E-07 | GPSGVVGAQLGR  | Phospho (ST) | 0.0000001000000.0 | Synth_pep_325V.809.809.2.dta               |
| GPSGVXSAQLXR 5 8 8 1 1178 | 1 | 445.575  | 1333.703 | 3   | 68.35 | 5.90E-07 | GPSGLVSAQLVK  | Phospho (ST) | 0.0000001000000.0 | Synth_pep_425V.1166.1166.3.dta             |
| SXPFKXSLXFGR 6 5 0 1 1302 | 1 | 486.9176 | 1457.731 | 3   | 69.5  | 5.80E-07 | SLFKASPLAFGK  | Phospho (ST) | 0.0000001000000.0 | Synth_pep_40V.1079.1079.3.dta              |
| SXPFKXSLXFGR 4 0 9 1 820  | 1 | 493.5737 | 1477.699 | 3   | 71.04 | 5.80E-07 | SGPKASPLVFGK  | Phospho (ST) | 0.0000001000000.0 | Synth_pep_425V.945.945.3.dta               |
| SXPFKXSLXFGR 5 8 1 0 1163 | 1 | 514.9291 | 1541.765 | 3   | 69.18 | 5.70E-07 | SLFKASPLDFGR  | Phospho (ST) | 0.0000001000000.0 | Synth_pep_375V.1168.1168.3.dta             |
| GPSGVXSAQLXR 3 9 8 0 797  | 1 | 730.8503 | 1459.866 | 2   | 68.61 | 5.70E-07 | GPSGVVSAQLYR  | Phospho (ST) | 0.0000001000000.0 | Synth_pep_325V.1199.1199.2.dta             |
| GPSGVXSAQLXR 5 5 9 0 1119 | 1 | 720.8667 | 1439.719 | 2   | 65.74 | 5.60E-07 | GPSGLVLAQLYR  | Phospho (ST) | 0.0000001000000.0 | Synth_pep_275V.1408.1408.2.dta             |
| SXPFKXSLXFGR 4 0 3 1 808  | 1 | 488.2424 | 1461.705 | 3   | 64.67 | 5.60E-07 | SGPKASPLFFGK  | Phospho (ST) | 0.0000001000000.0 | Synth_pep_425V.1044.1044.3.dta             |
| GPSGVXSAQLXR 2 2 3 0 447  | 1 | 728.8264 | 1455.638 | 2   | 68.66 | 5.60E-07 | GPSGVSEAQLFR  | Phospho (ST) | 0.0000001000000.0 | Synth_pep_35V.1101.1101.2.dta              |
| GPSGVXSAQLXR 5 0 0 0 1001 | 1 | 653.8287 | 1305.643 | 2   | 62.63 | 5.50E-07 | GPSGLVSAQLAR  | Phospho (ST) | 0.0000001000000.0 | Synth_pep_30V_120502214048.1008.1008.2.dta |
| GPSGVXSAQLXR 8 5 3 0 1707 | 1 | 705.8597 | 1409.705 | 2   | 67.47 | 5.40E-07 | GPSGVVLAQLFR  | Phospho (ST) | 0.0000001000000.0 | Synth_pep_30V_120502214048.1464.1464.2.dta |
| GPSGVXSAQLXR 5 4 8 0 1097 | 1 | 660.8374 | 1319.66  | 2   | 64.86 | 5.40E-07 | GPSGLVSAQLYR  | Phospho (ST) | 0.0000001000000.0 | Synth_pep_275V.1034.1034.2.dta             |
| SXPFKXSLXFGR 4 0 0 1 802  | 1 | 462.8994 | 1385.677 | 3   | 67.11 | 5.30E-07 | SGPKASPLAFGK  | Phospho (ST) | 0.0000001000000.0 | Synth_pep_375V.905.905.3.dta               |
| SXPFKXSLXFGR 4 3 8 1 1178 | 1 | 500.2734 | 1497.799 | 3   | 67.06 | 5.30E-07 | SLFKASPLVFGK  | Phospho (ST) | 0.0000001000000.0 | Synth_pep_40V.1167.1167.3.dta              |
| SXPFKXSLXFGR 6 0 9 1 140  | 1 | 503.5771 | 1507.71  | 3   | 72.34 | 5.20E-07 | SAPFKASPLVFGK | Phospho (ST) | 0.0000001000000.0 | Synth_pep_40V.897.897.3.dta                |
| GPSGVXSAQLXR 3 5 8 0 717  | 1 | 705.8601 | 1409.706 | 2   | 62.95 | 5.10E-07 | GPSGVFSAQLYR  | Phospho (ST) | 0.0000001000000.0 | Synth_pep_30V_120502214048.1392.1392.2.dta |
| SXPFKXSLXFGR 6 0 0 1 1202 | 1 | 472.9022 | 1415.685 | 3</ |       |          |               |              |                   |                                            |

|                            |   |          |          |   |       |          |               |              |                   |                                            |
|----------------------------|---|----------|----------|---|-------|----------|---------------|--------------|-------------------|--------------------------------------------|
| GPSGVXSQAQLXR 2 2 9 0 459  | 1 | 736.8218 | 1471.629 | 2 | 70.55 | 3.80E-07 | GPSGEVSEAQLYR | Phospho (ST) | 0.0000001000000.0 | Synth_pep_30V_120502214048.846.846.2.dta   |
| GPSGVXSQAQLXR 8 9 3 0 1787 | 1 | 730.8495 | 1459.684 | 2 | 70.33 | 3.80E-07 | GPSGVVSYAQLFR | Phospho (ST) | 0.0000001000000.0 | Synth_pep_275V.1378.1378.2.dta             |
| GPSGVXSQAQLXR 0 8 8 0 177  | 1 | 660.8376 | 1319.661 | 2 | 66.5  | 3.70E-07 | GPSGVVSYAQLFR | Phospho (ST) | 0.0000001000000.0 | Synth_pep_375V.1000.1000.2.dta             |
| GPSGVXSQAQLXR 2 9 5 0 591  | 1 | 728.8451 | 1455.676 | 2 | 70.07 | 3.70E-07 | GPSGVVSYAQLFR | Phospho (ST) | 0.0000001000000.0 | Synth_pep_325V.1129.1129.2.dta             |
| GPSGVXSQAQLXR 9 8 5 1 1972 | 1 | 466.9063 | 1397.697 | 3 | 71.23 | 3.70E-07 | GPSGVVSYAQLFR | Phospho (ST) | 0.0000001000000.0 | Synth_pep_375V.1203.1203.3.dta             |
| SXPFKXSPLXFG 9 5 1 1 1104  | 1 | 510.2648 | 1527.773 | 3 | 70.71 | 3.70E-07 | SXPFKKSPLDFGK | Phospho (ST) | 0.0000001000000.0 | Synth_pep_40V.1191.1191.3.dta              |
| GPSGVXSQAQLXR 2 1 9 0 439  | 1 | 729.8156 | 1457.617 | 2 | 70.85 | 3.60E-07 | GPSGVSDAQLYR  | Phospho (ST) | 0.0000001000000.0 | Synth_pep_325V.824.824.2.dta               |
| GPSGVXSQAQLXR 0 5 5 0 1111 | 1 | 674.8522 | 1347.69  | 2 | 64.56 | 3.50E-07 | GPSGVVSYAQLFR | Phospho (ST) | 0.0000001000000.0 | Synth_pep_275V.1397.1397.2.dta             |
| SXPFKXSPLXFG 4 6 0 1 922   | 1 | 468.231  | 1401.671 | 3 | 72.61 | 3.50E-07 | SGPFKSSPLAFGK | Phospho (ST) | 0.0000001000000.0 | Synth_pep_375V.872.872.3.dta               |
| SXPFKXSPLXFG 6 9 9 1 1400  | 1 | 534.2524 | 1599.736 | 3 | 68.72 | 3.40E-07 | SXPFKSSPLYFGK | Phospho (ST) | 0.0000001000000.0 | Synth_pep_40V.1023.1023.3.dta              |
| GPSGVXSQAQLXR 4 4 4 0 889  | 1 | 611.782  | 1221.55  | 2 | 76.72 | 3.40E-07 | GPSGVVSYAQLFR | Phospho (ST) | 0.0000001000000.0 | Synth_pep_275V.756.756.2.dta               |
| SXPFKXSPLXFG 0 9 9 1 200   | 1 | 528.9207 | 1583.74  | 3 | 70.83 | 3.30E-07 | SXPFKSSPLYFGK | Phospho (ST) | 0.0000001000000.0 | Synth_pep_425V.1017.1017.3.dta             |
| GPSGVXSQAQLXR 9 3 3 0 1867 | 1 | 503.569  | 1507.685 | 3 | 71.57 | 3.30E-07 | GPSGVVSYAQLFR | Phospho (ST) | 0.0000001000000.0 | Synth_pep_425V.1357.1357.3.dta             |
| GPSGVXSQAQLXR 2 2 9 0 459  | 1 | 736.8264 | 1471.638 | 2 | 70.61 | 3.20E-07 | GPSGEVSEAQLYR | Phospho (ST) | 0.0000001000000.0 | Synth_pep_275V.876.876.2.dta               |
| GPSGVXSQAQLXR 5 9 5 1 1192 | 1 | 471.5773 | 1411.71  | 3 | 70.96 | 3.20E-07 | GPSGLVSYAQLFR | Phospho (ST) | 0.0000001000000.0 | Synth_pep_40V.1225.1225.3.dta              |
| GPSGVXSQAQLXR 1 9 5 0 391  | 1 | 721.8362 | 1441.658 | 2 | 72.29 | 3.20E-07 | GPSGVVSYAQLFR | Phospho (ST) | 0.0000001000000.0 | Synth_pep_325V.1105.1105.2.dta             |
| GPSGVXSQAQLXR 5 5 8 1 1118 | 1 | 450.2463 | 1347.717 | 3 | 69.08 | 2.90E-07 | GPSGLVSYAQLFR | Phospho (ST) | 0.0000001000000.0 | Synth_pep_425V.1282.1282.3.dta             |
| SXPFKXSPLXFG 6 5 5 1 1312  | 1 | 500.9341 | 1499.781 | 3 | 70.66 | 2.90E-07 | SXPFKKSPLDFGK | Phospho (ST) | 0.0000001000000.0 | Synth_pep_375V.1201.1201.3.dta             |
| GPSGVXSQAQLXR 0 1 6 0 33   | 1 | 662.7977 | 1323.581 | 2 | 71.28 | 2.90E-07 | GPSGVSDAQLYR  | Phospho (ST) | 0.0000001000000.0 | Synth_pep_40V.728.728.2.dta                |
| GPSGVXSQAQLXR 3 8 8 0 777  | 1 | 698.8535 | 1395.693 | 2 | 65.6  | 2.80E-07 | GPSGVVSYAQLFR | Phospho (ST) | 0.0000001000000.0 | Synth_pep_325V.1239.1239.2.dta             |
| GPSGVXSQAQLXR 8 5 8 0 1717 | 1 | 681.8589 | 1361.703 | 2 | 67.35 | 2.70E-07 | GPSGLVSYAQLFR | Phospho (ST) | 0.0000001000000.0 | Synth_pep_30V_120502214048.1329.1329.2.dta |
| GPSGVXSQAQLXR 1 0 8 0 217  | 1 | 668.8163 | 1335.618 | 2 | 71.58 | 2.60E-07 | GPSGLVSYAQLFR | Phospho (ST) | 0.0000001000000.0 | Synth_pep_35V.867.867.2.dta                |
| SXPFKXSPLXFG 6 5 5 1 1102  | 1 | 495.6017 | 1483.783 | 3 | 69.76 | 2.50E-07 | SXPFKKSPLDFGK | Phospho (ST) | 0.0000001000000.0 | Synth_pep_40V.1191.1191.3.dta              |
| GPSGVXSQAQLXR 5 8 0 0 1161 | 1 | 667.846  | 1333.678 | 2 | 68.85 | 2.50E-07 | GPSGLVSYAQLFR | Phospho (ST) | 0.0000001000000.0 | Synth_pep_35V.1097.1097.2.dta              |
| SXPFKXSPLXFG 4 3 0 1 862   | 1 | 488.243  | 1461.707 | 3 | 68.25 | 2.50E-07 | SGPFKSSPLAFGK | Phospho (ST) | 0.0000001000000.0 | Synth_pep_375V.1120.1120.3.dta             |
| GPSGVXSQAQLXR 0 9 0 0 181  | 1 | 678.8191 | 1355.624 | 2 | 69.5  | 2.50E-07 | GPSGVVSYAQLFR | Phospho (ST) | 0.0000001000000.0 | Synth_pep_375V.881.881.2.dta               |
| GPSGVXSQAQLXR 8 8 2 0 1765 | 1 | 689.8404 | 1377.666 | 2 | 71.31 | 2.50E-07 | GPSGVVSYAQLFR | Phospho (ST) | 0.0000001000000.0 | Synth_pep_325V.1001.1001.2.dta             |
| GPSGVXSQAQLXR 3 9 5 0 791  | 1 | 737.8583 | 1473.702 | 2 | 71.09 | 2.50E-07 | GPSGVVSYAQLFR | Phospho (ST) | 0.0000001000000.0 | Synth_pep_325V.1384.1384.2.dta             |
| SXPFKXSPLXFG 4 5 0 1 902   | 1 | 476.9144 | 1427.721 | 3 | 72.3  | 2.40E-07 | SGPFKKSPLDFGK | Phospho (ST) | 0.0000001000000.0 | Synth_pep_35V.1108.1108.3.dta              |
| GPSGVXSQAQLXR 2 2 2 0 445  | 1 | 719.8133 | 1437.612 | 2 | 72.78 | 2.40E-07 | GPSGEVSEAQLYR | Phospho (ST) | 0.0000001000000.0 | Synth_pep_325V.769.769.2.dta               |
| GPSGVXSQAQLXR 2 1 9 0 439  | 1 | 729.8145 | 1457.614 | 2 | 71.11 | 2.40E-07 | GPSGVSDAQLYR  | Phospho (ST) | 0.0000001000000.0 | Synth_pep_30V_120502214048.818.818.2.dta   |
| SXPFKXSPLXFG 4 8 0 1 962   | 1 | 472.2429 | 1413.707 | 3 | 72.72 | 2.20E-07 | SGPFKKSPLDFGK | Phospho (ST) | 0.0000001000000.0 | Synth_pep_375V.1008.1008.3.dta             |
| GPSGVXSQAQLXR 0 8 5 0 171  | 1 | 667.8454 | 1333.676 | 2 | 69.45 | 2.20E-07 | GPSGVVSYAQLFR | Phospho (ST) | 0.0000001000000.0 | Synth_pep_325V.1184.1184.2.dta             |
| SXPFKXSPLXFG 4 5 0 1 906   | 1 | 496.2498 | 1485.728 | 3 | 75.21 | 2.20E-07 | SGPFKKSPLDFGK | Phospho (ST) | 0.0000001000000.0 | Synth_pep_40V.1082.1082.3.dta              |
| SXPFKXSPLXFG 4 3 0 0 861   | 1 | 497.5781 | 1489.713 | 3 | 70.65 | 2.20E-07 | SGPFKKSPLDFGK | Phospho (ST) | 0.0000001000000.0 | Synth_pep_375V.1136.1136.3.dta             |
| GPSGVXSQAQLXR 5 3 0 0 1061 | 1 | 691.8452 | 1381.676 | 2 | 68.31 | 2.20E-07 | GPSGLVSYAQLFR | Phospho (ST) | 0.0000001000000.0 | Synth_pep_325V.1248.1248.2.dta             |
| GPSGVXSQAQLXR 3 6 0 0 721  | 1 | 678.8169 | 1355.619 | 2 | 73.5  | 2.20E-07 | GPSGVVSYAQLFR | Phospho (ST) | 0.0000001000000.0 | Synth_pep_30V_120502214048.931.931.2.dta   |
| GPSGVXSQAQLXR 5 9 9 0 1199 | 1 | 745.8558 | 1489.697 | 2 | 71.32 | 2.20E-07 | GPSGLVSYAQLFR | Phospho (ST) | 0.0000001000000.0 | Synth_pep_325V.1160.1160.2.dta             |
| SXPFKXSPLXFG 4 0 0 1 802   | 1 | 462.8992 | 1385.676 | 3 | 73.51 | 2.00E-07 | SGPFKKSPLDFGK | Phospho (ST) | 0.0000001000000.0 | Synth_pep_425V.897.897.3.dta               |
| GPSGVXSQAQLXR 3 2 3 0 647  | 1 | 737.8395 | 1473.664 | 2 | 73.26 | 2.00E-07 | GPSGEVSEAQLYR | Phospho (ST) | 0.0000001000000.0 | Synth_pep_35V.1209.1209.2.dta              |
| GPSGVXSQAQLXR 3 2 3 0 647  | 1 | 737.8404 | 1473.666 | 2 | 73.32 | 2.00E-07 | GPSGEVSEAQLYR | Phospho (ST) | 0.0000001000000.0 | Synth_pep_325V.1233.1233.2.dta             |
| GPSGVXSQAQLXR 1 5 3 0 307  | 1 | 713.8396 | 1425.665 | 2 | 72.45 | 2.00E-07 | GPSGLVSYAQLFR | Phospho (ST) | 0.0000001000000.0 | Synth_pep_325V.1305.1305.2.dta             |
| GPSGVXSQAQLXR 8 3 3 0 1667 | 1 | 722.8513 | 1443.688 | 2 | 72    | 2.00E-07 | GPSGVVSYAQLFR | Phospho (ST) | 0.0000001000000.0 | Synth_pep_30V_120502214048.1466.1466.2.dta |
| GPSGVXSQAQLXR 5 0 5 0 1011 | 1 | 674.8523 | 1347.69  | 2 | 67.21 | 1.90E-07 | GPSGLVSYAQLFR | Phospho (ST) | 0.0000001000000.0 | Synth_pep_30V_120502214048.1248.1248.2.dta |
| GPSGVXSQAQLXR 5 8 3 0 1167 | 1 | 705.86   | 1409.705 | 2 | 67.71 | 1.70E-07 | GPSGLVSYAQLFR | Phospho (ST) | 0.0000001000000.0 | Synth_pep_325V.1408.1408.2.dta             |
| GPSGVXSQAQLXR 9 3 3 0 1867 | 1 | 754.8507 | 1507.687 | 2 | 73.68 | 1.70E-07 | GPSGLVSYAQLFR | Phospho (ST) | 0.0000001000000.0 | Synth_pep_275V.1545.1545.2.dta             |
| SXPFKXSPLXFG 8 8 9 1 1780  | 1 | 516.9344 | 1547.782 | 3 | 71.67 | 1.70E-07 | SXPFKKSPLDFGK | Phospho (ST) | 0.0000001000000.0 | Synth_pep_375V.1096.1096.3.dta             |
| GPSGVXSQAQLXR 4 9 3 0 987  | 1 | 709.8256 | 1417.637 | 2 | 75.8  | 1.70E-07 | GPSGVVSYAQLFR | Phospho (ST) | 0.0000001000000.0 | Synth_pep_275V.1245.1245.2.dta             |
| GPSGVXSQAQLXR 5 9 5 0 1191 | 1 | 480.9132 | 1439.718 | 3 | 71.25 | 1.60E-07 | GPSGLVSYAQLFR | Phospho (ST) | 0.0000001000000.0 | Synth_pep_425V.1250.1250.3.dta             |
| SXPFKXSPLXFG 5 5 5 1 1112  | 1 | 509.6168 | 1525.829 | 3 | 68.03 | 1.60E-07 | SXPFKKSPLDFGK | Phospho (ST) | 0.0000001000000.0 | Synth_pep_40V.1295.1295.3.dta              |
| SXPFKXSPLXFG 4 3 0 1 862   | 1 | 488.2422 | 1461.705 | 3 | 70.2  | 1.60E-07 | SGPFKKSPLDFGK | Phospho (ST) | 0.0000001000000.0 | Synth_pep_40V.1112.1112.3.dta              |
| GPSGVXSQAQLXR 1 1 2 0 225  | 1 | 705.7975 | 1409.581 | 2 | 72.76 | 1.60E-07 | GPSGVSDAQLYR  | Phospho (ST) | 0.0000001000000.0 | Synth_pep_35V.754.754.2.dta                |
| SXPFKXSPLXFG 5 8 9 1 1180  | 1 | 521.6054 | 1561.794 | 3 | 70.76 | 1.60E-07 | SXPFKKSPLDFGK | Phospho (ST) | 0.0000001000000.0 | Synth_pep_40V.1151.1151.3.dta              |
| SXPFKXSPLXFG 4 0 0 1 802   | 1 | 462.8986 | 1385.674 | 3 | 75.03 | 1.50E-07 | SGPFKKSPLDFGK | Phospho (ST) | 0.0000001000000.0 | Synth_pep_40V.896.896.3.dta                |
| GPSGVXSQAQLXR 5 9 9 0 1019 | 1 | 466.8975 | 1397.671 | 3 | 72.69 | 1.50E-07 | GPSGLVSYAQLFR | Phospho (ST) | 0.0000001000000.0 | AIC_synth_45.1269.1269.3.dta               |
| GPSGVXSQAQLXR 5 9 5 0 1191 | 1 | 480.9127 | 1439.716 | 3 | 70.35 | 1.40E-07 | GPSGLVSYAQLFR | Phospho (ST) | 0.0000001000000.0 | AIC_synth_45.1628.1628.3.dta               |
| GPSGVXSQAQLXR 5 5 5 0 1111 | 1 | 695.8755 | 1389.737 | 2 | 69.8  | 1.40E-07 | GPSGLVSYAQLFR | Phospho (ST) | 0.0000001000000.0 | Synth_pep_30V_120502214048.1496.1496.2.dta |
| GPSGVXSQAQLXR 8 5 5 0 1711 | 1 | 688.8676 | 1375.721 | 2 | 68.6  | 1.40E-07 | GPSGLVSYAQLFR | Phospho (ST) | 0.0000001000000.0 | Synth_pep_325V.1409.1409.2.dta             |
| GPSGVXSQAQLXR 2 2 5 0 451  | 1 | 711.8337 | 1421.653 | 2 | 75.28 | 1.40E-07 | GPSGEVSEAQLYR | Phospho (ST) | 0.0000001000000.0 | Synth_pep_35V.941.941.2.dta                |
| GPSGVXSQAQLXR 5 3 5 0 1071 | 1 | 712.8675 | 1423.762 | 2 | 72.25 | 1.30E-07 | GPSGLVSYAQLFR | Phospho (ST) | 0.0000001000000.0 | Synth_pep_30V_120502214048.1481.1481.2.dta |
| GPSGVXSQAQLXR 8 9 8 0 1797 | 1 | 706.8503 | 1411.686 | 2 | 70.55 | 1.30E-07 | GPSGVVSYAQLFR | Phospho (ST) | 0.0000001000000.0 | Synth_pep_35V.1080.1080.2.dta              |
| GPSGVXSQAQLXR 6 1 1 1 1224 | 1 | 670.7932 | 1339.572 | 2 | 72.17 | 1.30E-07 | GPSGVSDAQLYR  | Phospho (ST) | 0.0000001000000.0 | Synth_pep_40V.720.720.2.dta                |
| GPSGVXSQAQLXR 6 1 6 0 1233 | 1 | 670.7932 | 1339.572 | 2 | 72.17 | 1.30E-07 | GPSGVSDAQLYR  | Phospho (ST) | 0.0000001000000.0 | Synth_pep_40V.720.720.2.dta                |
| GPSGVXSQAQLXR 5 8 0 0 1117 | 1 | 688.8704 | 1375.726 | 2 | 71.98 | 1.20E-07 | GPSGLVSYAQLFR | Phospho (ST) | 0.0000001000000.0 | AIC_synth_test_25.1863.1863.2.dta          |
| GPSGVXSQAQLXR 5 8 0 0 1161 | 1 | 667.8452 | 1333.676 | 2 | 72.23 | 1.20E-07 | GPSGLVSYAQLFR | Phospho (ST) | 0.0000001000000.0 | Synth_pep_325V.1112.1112.2.dta             |
| SXPFKXSPLXFG 0 5 0 1 102   | 1 | 481.5867 | 1441.738 | 3 | 74.53 | 1.20E-07 | SXPFKKSPLDFGK | Phospho (ST) | 0.0000001000000.0 | Synth_pep_425V.1079.1079.3.dta             |
| GPSGVXSQAQLXR 0 1 6 0 33   | 1 | 662.798  | 1323.581 | 2 | 75.14 | 1.20E-07 | GPSGVSDAQLYR  | Phospho (ST) | 0.0000001000000.0 | Synth_pep_375V.736.736.2.dta               |
| GPSGVXSQAQLXR 9 1 6 0 1833 | 1 | 708.8084 | 1415.602 | 2 | 72.86 | 1.20E-07 | GPSGVSDAQLYR  | Phospho (ST) | 0.0000001000000.0 | Synth_pep_35V.809.809.2.dta                |
| GPSGVXSQAQLXR 9 1 1 1 1824 | 1 | 708.8084 | 1415.602 | 2 | 72.86 | 1.20E-07 | GPSGVSDAQLYR  | Phospho (ST) | 0.0000001000000.0 | Synth_pep_35V.809.809.2.dta                |
| GPSGVXSQAQLXR 3 4 1 0 683  | 1 | 685.8091 | 1369.604 | 2 | 72.02 | 1.20E-07 | GPSGVVSYAQLFR | Phospho (ST) | 0.0000001000000.0 | AIC_synth_test_25.1095.1095.2.dta          |
| SXPFKXSPLXFG 4 6 6 1 934   | 1 | 473.5611 | 1417.662 | 3 | 75.71 | 1.10E-07 | SGPFKKSPLDFGK | Phospho (ST) | 0.0000001000000.0 | Synth_pep_40V.873.873.3.dta                |
| SXPFKXSPLXFG 5 9 9 1 1080  | 1 | 537.6056 | 1609.795 | 3 | 70.5  | 1.10E-07 | SXPFKKSPLDFGK | Phospho (ST) | 0.0000001000000.0 | Synth_pep_40V.1239.1239.3.dta              |
| SXPFKXSPLXFG 5 3 9 1 1080  | 1 | 537.6066 | 1609.798 | 3 | 69.65 | 1.10E-07 | SXPFKKSPLDFGK | Phospho (ST) | 0.0000001000000.0 | Synth_pep_375V.1243.1243.3.dta             |
| SXPFKXSPLXFG 8 9 9 1 1800  | 1 | 538.2653 | 1611.774 | 3 | 70.73 | 1.00E-07 | SXPFKKSPLDFGK | Phospho (ST) | 0.0000001000000.0 | Synth_pep_375V.1059.1059.3.dta             |
| GPSGVXSQAQLXR 3 2 5 0 651  | 1 | 720.8463 | 1439.678 | 2 | 75.47 | 1.00E-07 | GPSGVVSYAQLFR | Phospho (ST) | 0.0000001000000.0 | Synth_pep_30V_120502214048.1198.1198.2.dta |
| GPSGVXSQAQLXR 9 2 0 0 1841 | 1 | 472.2164 | 1413.627 | 3 | 78.03 | 1.00E-07 | GPSGEVSEAQLYR | Phospho (ST) | 0.0000001000000.0 | Synth_pep_425V.850.850.3.dta               |
| GPSGVXSQAQLXR 2 2 9 0 459  | 1 | 736.8239 | 1471.633 | 2 | 76.38 | 9.90E-08 | GPSGEVSEAQLYR | Phospho (ST) | 0.0000001000000.0 | Synth_pep_325V.849.849.2.dta               |
| GPSGVXSQAQLXR 4 3 3 0 867  |   |          |          |   |       |          |               |              |                   |                                            |



|                            |   |          |          |   |       |          |               |              |                   |                                            |
|----------------------------|---|----------|----------|---|-------|----------|---------------|--------------|-------------------|--------------------------------------------|
| GPSGXVSAQQLXR 8 5 6 0 1713 | 1 | 675.8428 | 1349.671 | 2 | 80.44 | 2.70E-08 | GPSGVVSLAQLSR | Phospho (ST) | 0.0000001000000.0 | Synth_pep_325V.1087.1087.2.dta             |
| GPSGXVSAQQLXR 6 8 0 0 1361 | 1 | 654.8183 | 1307.622 | 2 | 80.38 | 2.60E-08 | GPSGVSVAQLAR  | Phospho (ST) | 0.0000001000000.0 | Synth_pep_375V.866.866.2.dta               |
| SXPFKXSPLXFR 4 5 0 1 902   | 1 | 476.9148 | 1427.723 | 3 | 82.87 | 2.10E-08 | SGPFKLSPLAFGK | Phospho (ST) | 0.0000001000000.0 | Synth_pep_375V.1081.1081.3.dta             |
| GPSGXVSAQQLXR 0 0 1 0 3    | 1 | 654.8015 | 1307.588 | 2 | 84.27 | 2.10E-08 | GPSGAVSAAQLDR | Phospho (ST) | 0.0000001000000.0 | Synth_pep_275V.800.800.2.dta               |
| SXPFKXSPLXFR 6 5 0 1 1302  | 1 | 486.9178 | 1457.732 | 3 | 84.21 | 2.00E-08 | SXPFKLSPLAFGK | Phospho (ST) | 0.0000001000000.0 | Synth_pep_35V.1105.1105.3.dta              |
| SXPFKXSPLXFR 0 0 5 1 12    | 1 | 481.5871 | 1441.739 | 3 | 79.98 | 2.00E-08 | SAPFKASPLLFGK | Phospho (ST) | 0.0000001000000.0 | Synth_pep_425V.997.997.3.dta               |
| GPSGXVSAQQLXR 0 1 7 0 35   | 1 | 669.8047 | 1337.595 | 2 | 81.53 | 2.00E-08 | GPSGAVSQAQLTR | Phospho (ST) | 0.0000001000000.0 | Synth_pep_425V.753.753.2.dta               |
| GPSGXVSAQQLXR 9 5 5 0 1911 | 1 | 720.8668 | 1439.719 | 2 | 80.37 | 1.90E-08 | GPSGVVSLAQLLR | Phospho (ST) | 0.0000001000000.0 | Synth_pep_275V.1488.1488.2.dta             |
| GPSGXVSAQQLXR 2 3 3 0 467  | 1 | 737.8382 | 1473.662 | 2 | 79.73 | 1.90E-08 | GPSGVSFAQLFR  | Phospho (ST) | 0.0000001000000.0 | Synth_pep_275V.1465.1465.2.dta             |
| GPSGXVSAQQLXR 8 8 3 0 1767 | 1 | 698.8525 | 1395.69  | 2 | 77.41 | 1.80E-08 | GPSGVVVAQLFR  | Phospho (ST) | 0.0000001000000.0 | Synth_pep_325V.1319.1319.2.dta             |
| SXPFKXSPLXFR 4 8 0 1 962   | 1 | 472.2424 | 1413.706 | 3 | 83.96 | 1.70E-08 | SGPFKVSPLAFGK | Phospho (ST) | 0.0000001000000.0 | Synth_pep_40V.996.996.3.dta                |
| GPSGXVSAQQLXR 5 4 5 0 1091 | 1 | 667.8455 | 1333.676 | 2 | 80.79 | 1.60E-08 | GPSGLVSGAQLLR | Phospho (ST) | 0.0000001000000.0 | AJC_synth_test_25.1418.1418.2.dta          |
| GPSGXVSAQQLXR 4 5 5 0 911  | 1 | 667.8451 | 1333.676 | 2 | 81.07 | 1.50E-08 | GPSGGVSLAQLLR | Phospho (ST) | 0.0000001000000.0 | Synth_pep_275V.1376.1376.2.dta             |
| GPSGXVSAQQLXR 5 5 5 1 1112 | 1 | 454.9176 | 1361.731 | 3 | 82.42 | 1.30E-08 | GPSGLVSLAQLLK | Phospho (ST) | 0.0000001000000.0 | Synth_pep_40V.1383.1383.3.dta              |
| GPSGXVSAQQLXR 1 4 5 0 291  | 1 | 668.8162 | 1335.618 | 2 | 84.99 | 1.20E-08 | GPSGLVSGAQLLR | Phospho (ST) | 0.0000001000000.0 | Synth_pep_325V.912.912.2.dta               |
| GPSGXVSAQQLXR 5 0 5 0 1011 | 1 | 674.8532 | 1347.692 | 2 | 81.11 | 7.70E-09 | GPSGLVSAQLLR  | Phospho (ST) | 0.0000001000000.0 | Synth_pep_325V.1208.1208.2.dta             |
| GPSGXVSAQQLXR 5 8 8 0 1177 | 1 | 681.861  | 1361.708 | 2 | 81.66 | 7.20E-09 | GPSGLVVAQLVR  | Phospho (ST) | 0.0000001000000.0 | Synth_pep_35V.1200.1200.2.dta              |
| GPSGXVSAQQLXR 8 5 5 0 1711 | 1 | 688.8691 | 1375.724 | 2 | 85.23 | 6.70E-09 | GPSGVVSLAQLLR | Phospho (ST) | 0.0000001000000.0 | Synth_pep_275V.1504.1504.2.dta             |
| GPSGXVSAQQLXR 5 9 5 0 1191 | 1 | 720.8666 | 1439.719 | 2 | 85.45 | 6.00E-09 | GPSGLVSYAQLLR | Phospho (ST) | 0.0000001000000.0 | Synth_pep_325V.1304.1304.2.dta             |
| GPSGXVSAQQLXR 8 8 0 0 1761 | 1 | 660.8374 | 1319.66  | 2 | 84.75 | 5.50E-09 | GPSGVVVAQLAR  | Phospho (ST) | 0.0000001000000.0 | Synth_pep_35V.1008.1008.2.dta              |
| GPSGXVSAQQLXR 0 5 5 0 111  | 1 | 674.8521 | 1347.69  | 2 | 84.71 | 3.40E-09 | GPSGAVSLAQLLR | Phospho (ST) | 0.0000001000000.0 | Synth_pep_30V_120502214048.1320.1320.2.dta |
| GPSGXVSAQQLXR 5 0 5 0 1011 | 1 | 674.8535 | 1347.692 | 2 | 84.93 | 3.20E-09 | GPSGLVSAQLLR  | Phospho (ST) | 0.0000001000000.0 | Synth_pep_275V.1308.1308.2.dta             |
| GPSGXVSAQQLXR 5 3 5 0 1071 | 1 | 475.5816 | 1423.723 | 3 | 85.24 | 3.00E-09 | GPSGLVSAQLLR  | Phospho (ST) | 0.0000001000000.0 | Synth_pep_425V.1393.1393.3.dta             |
| GPSGXVSAQQLXR 8 8 5 0 1771 | 1 | 681.861  | 1361.708 | 2 | 89.17 | 1.30E-09 | GPSGVVVAQLLR  | Phospho (ST) | 0.0000001000000.0 | Synth_pep_275V.1374.1374.2.dta             |
