# Supplementary material
Source: PubMed Central journal article supplement (PMC3842852)

a

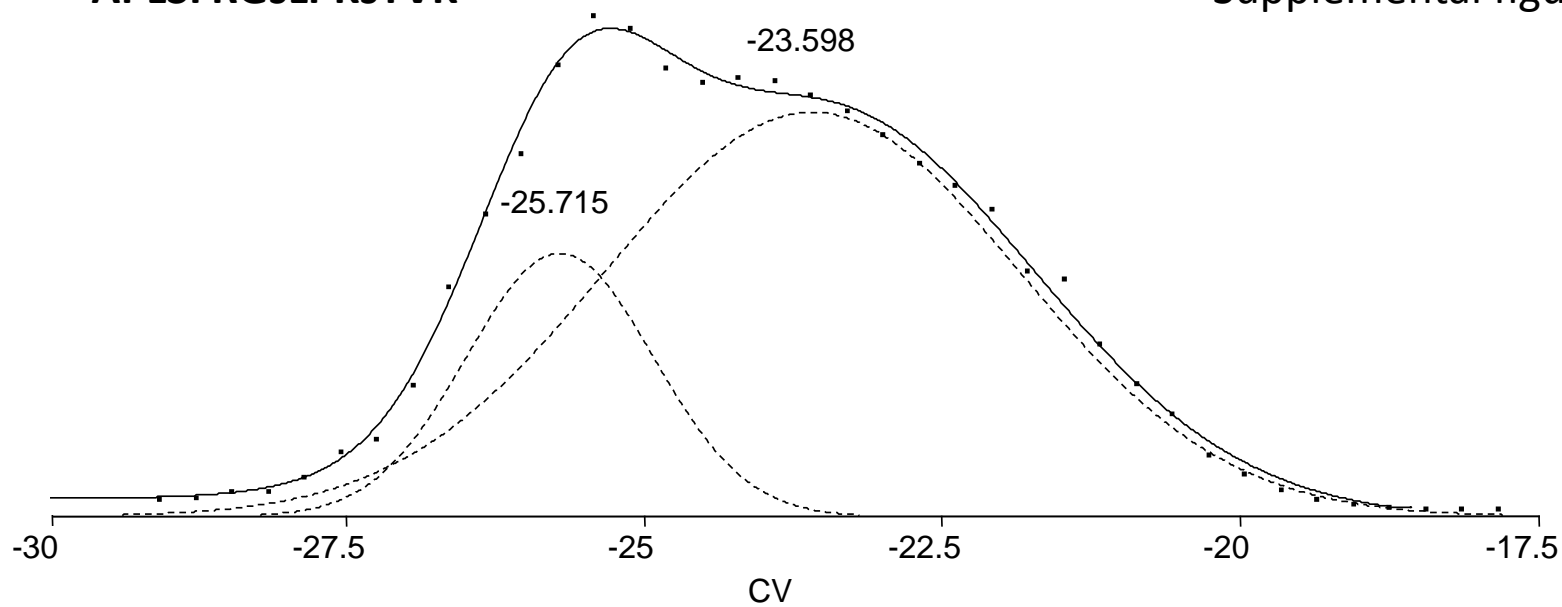

b

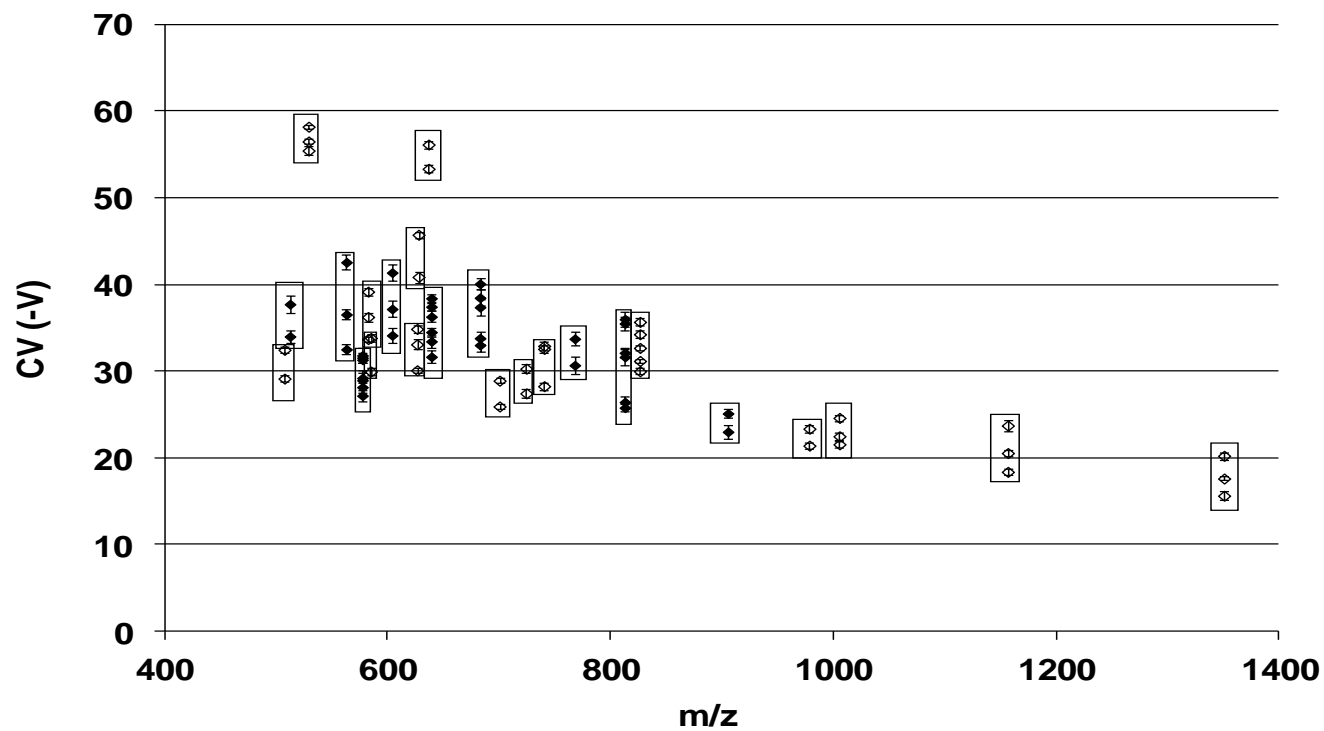

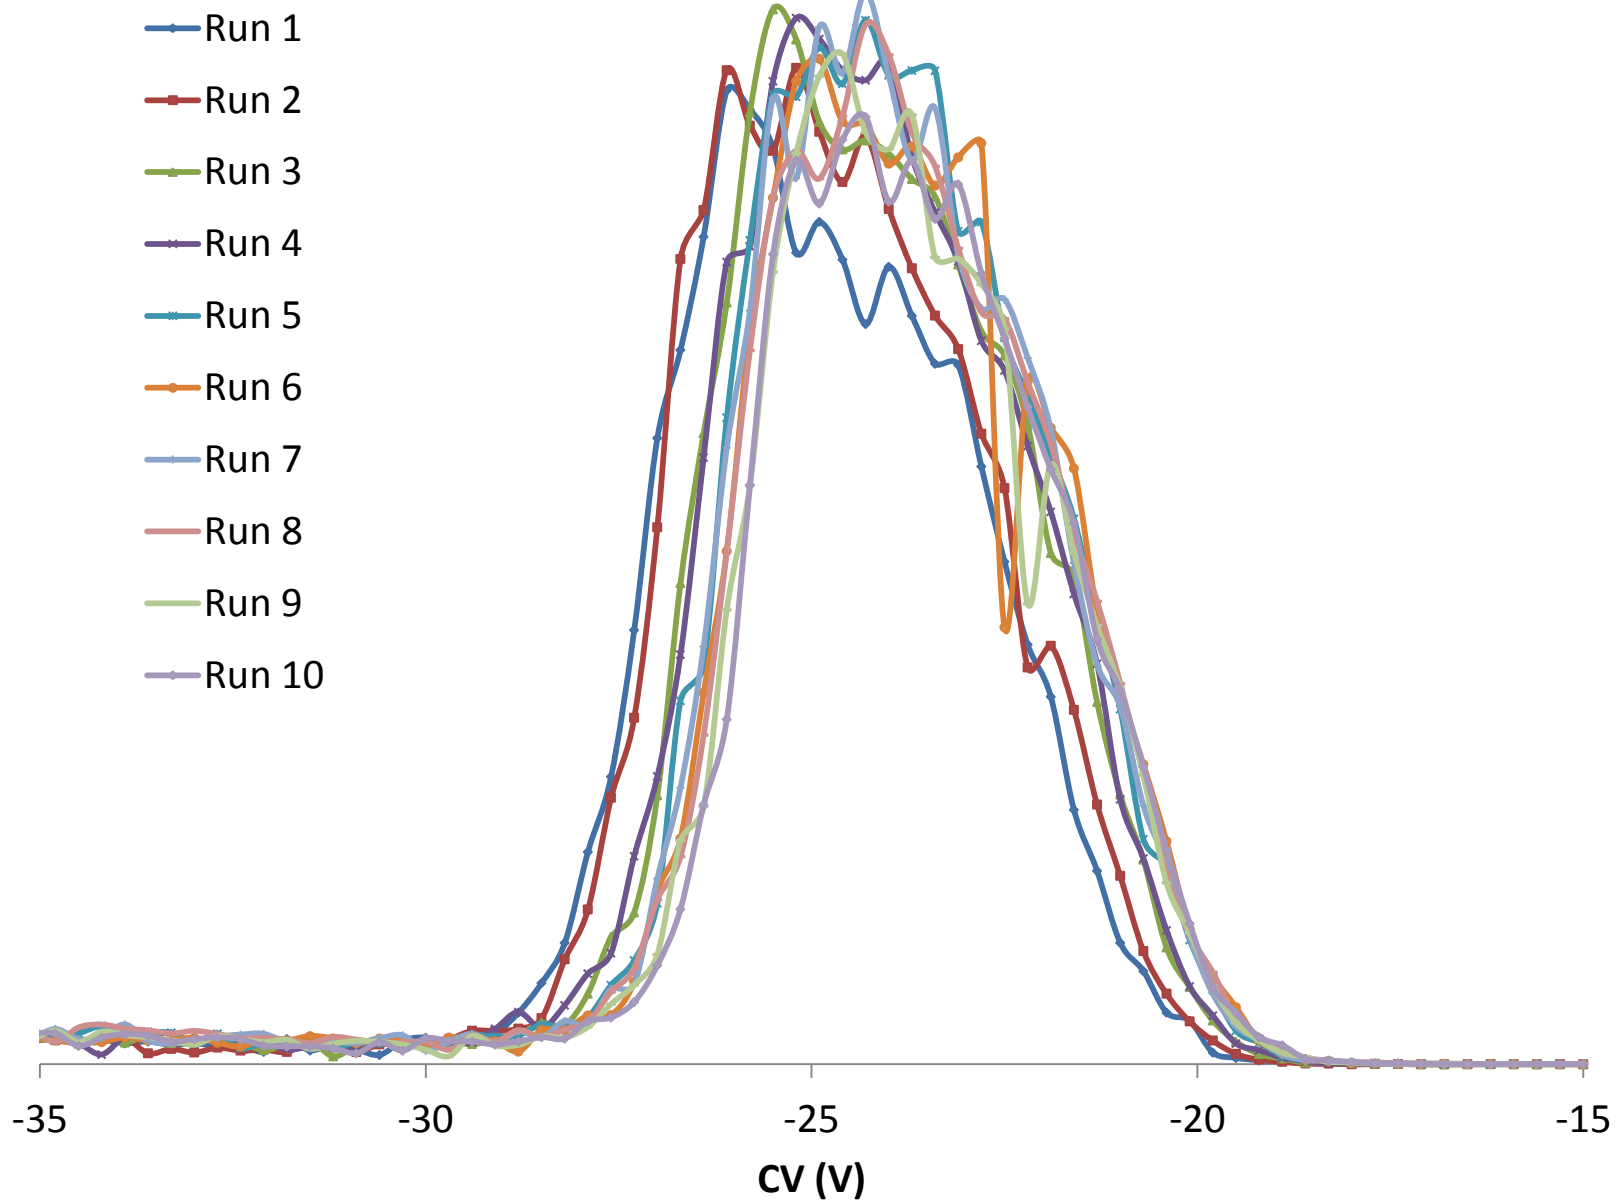

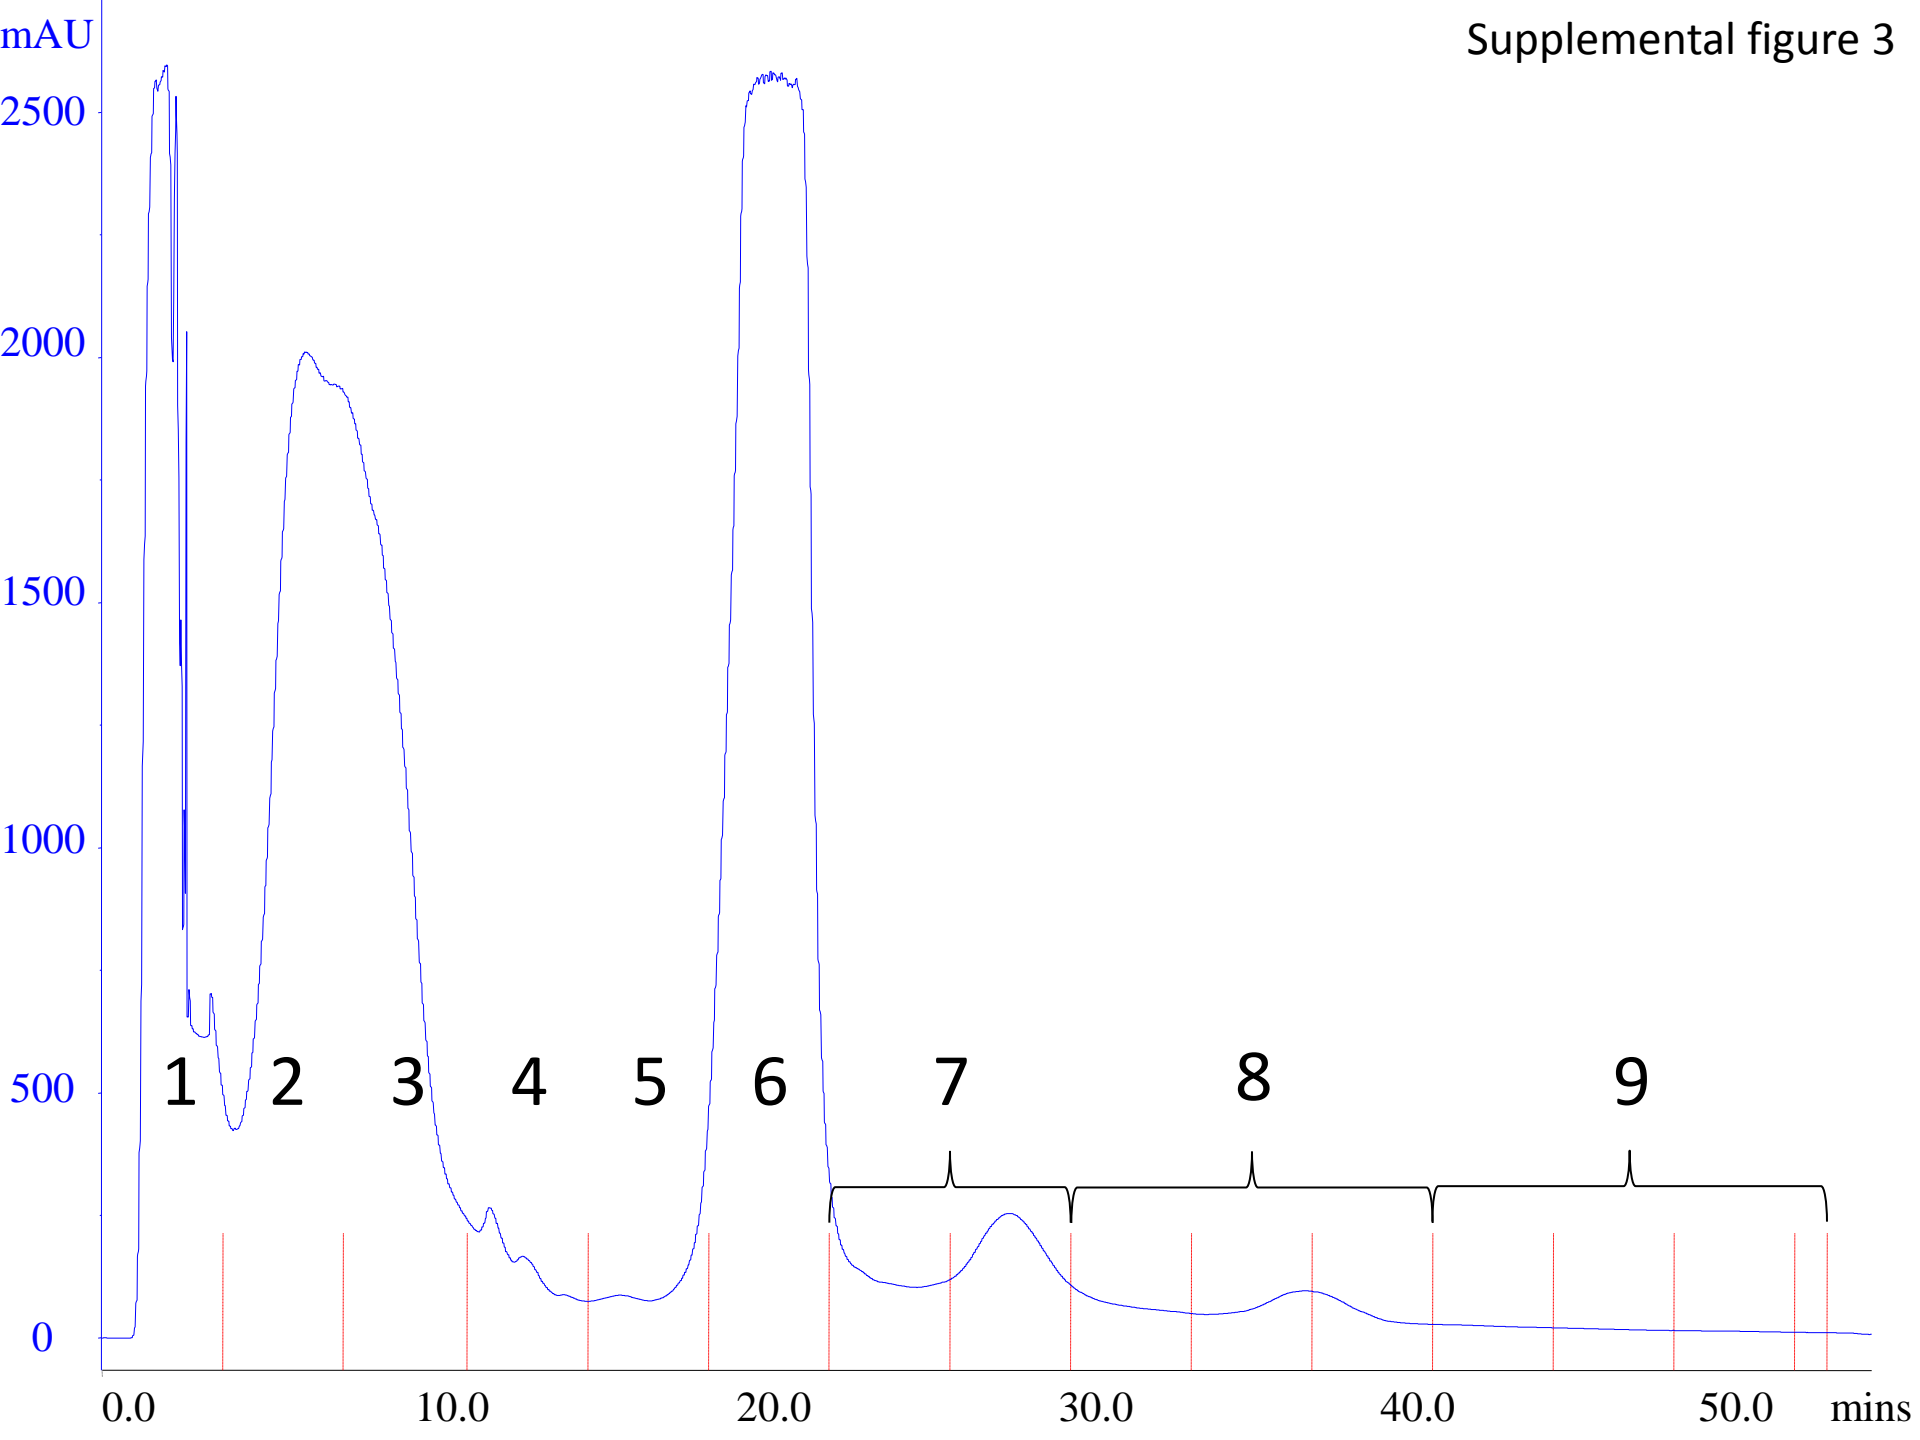

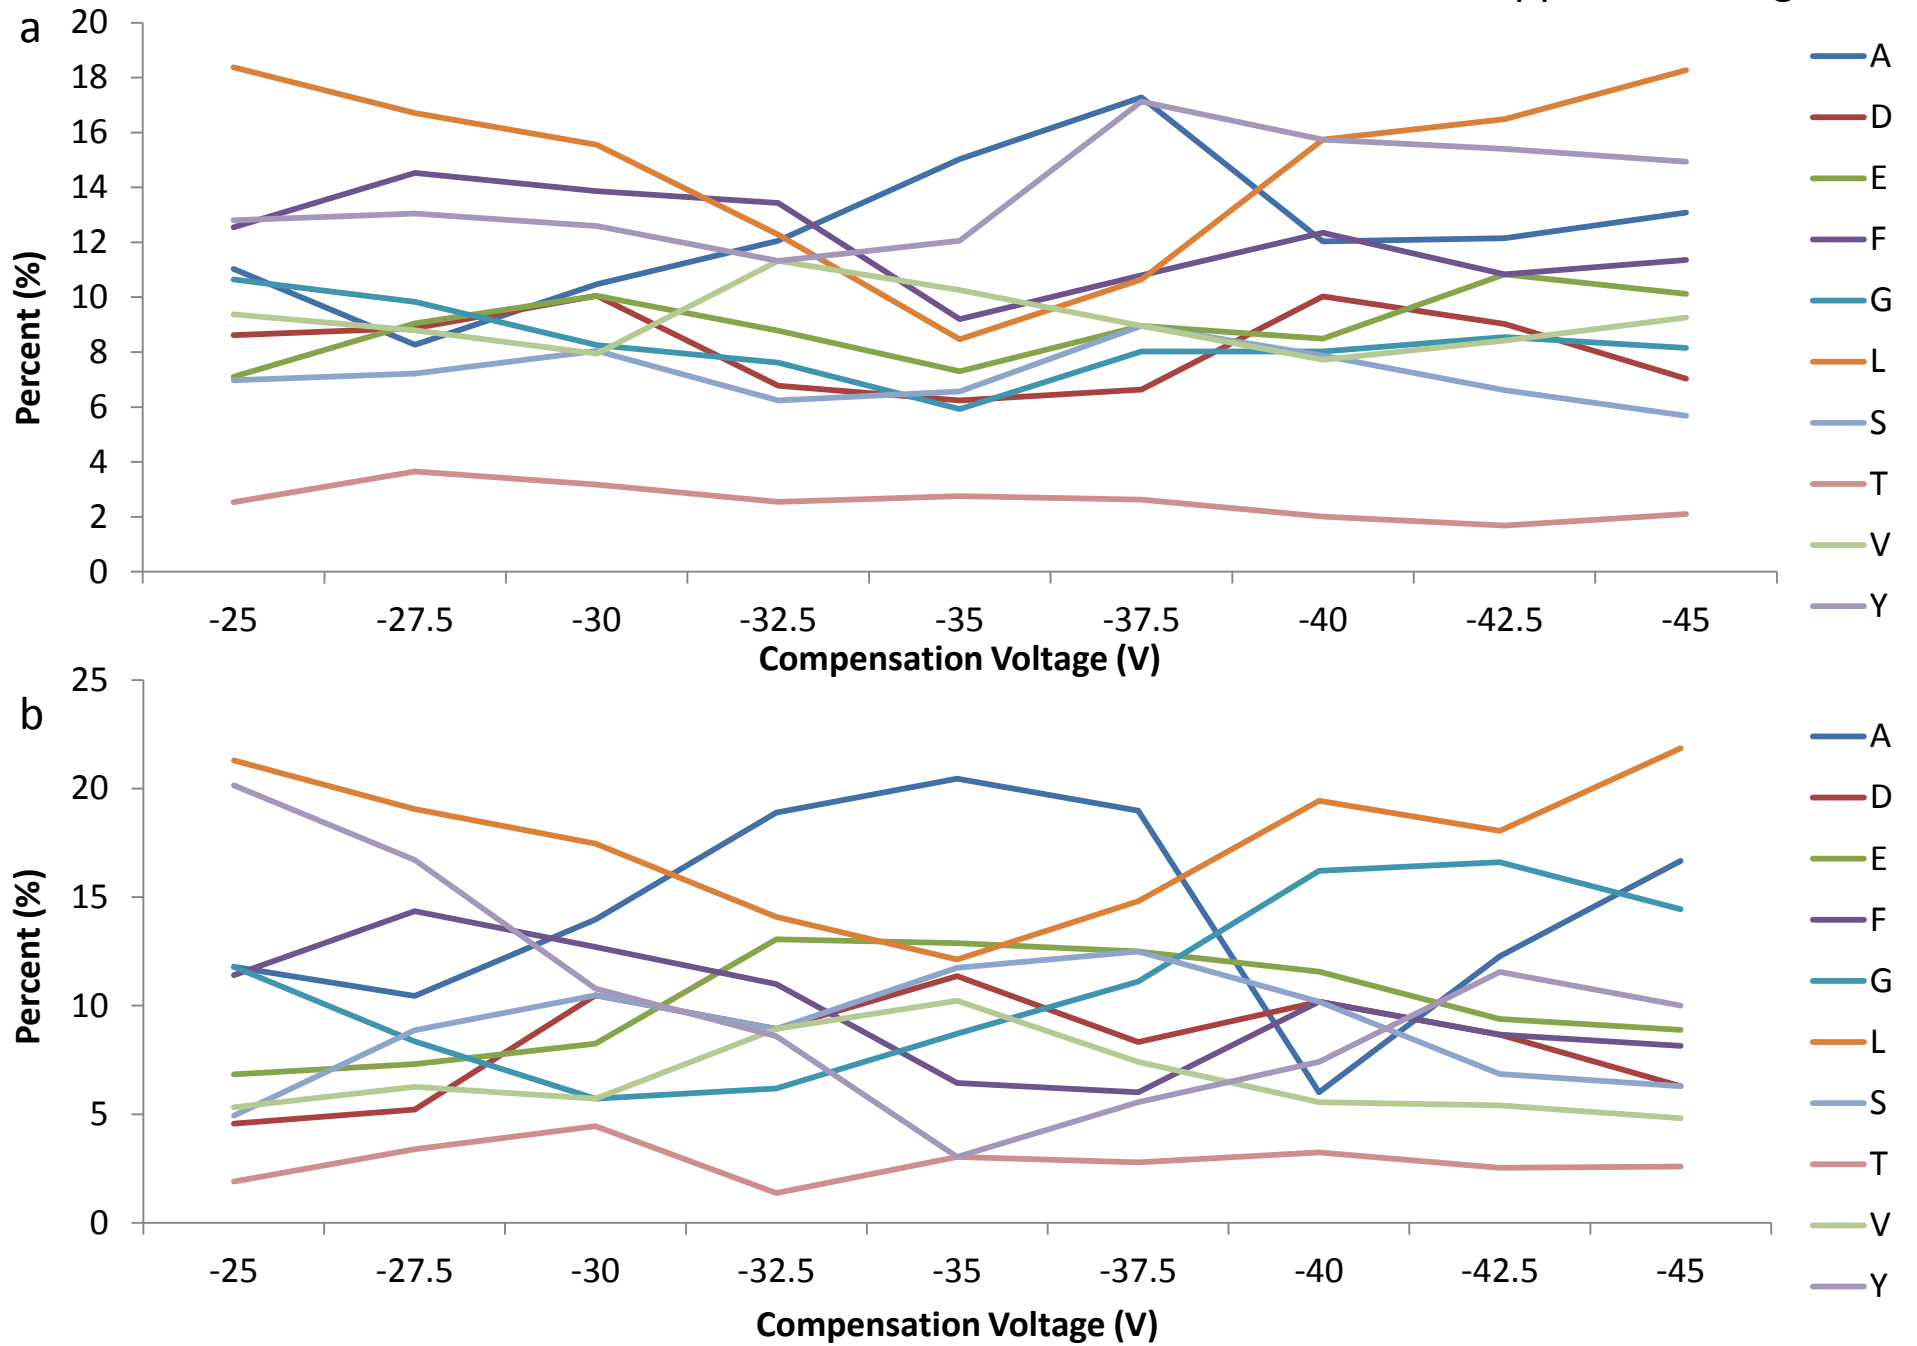

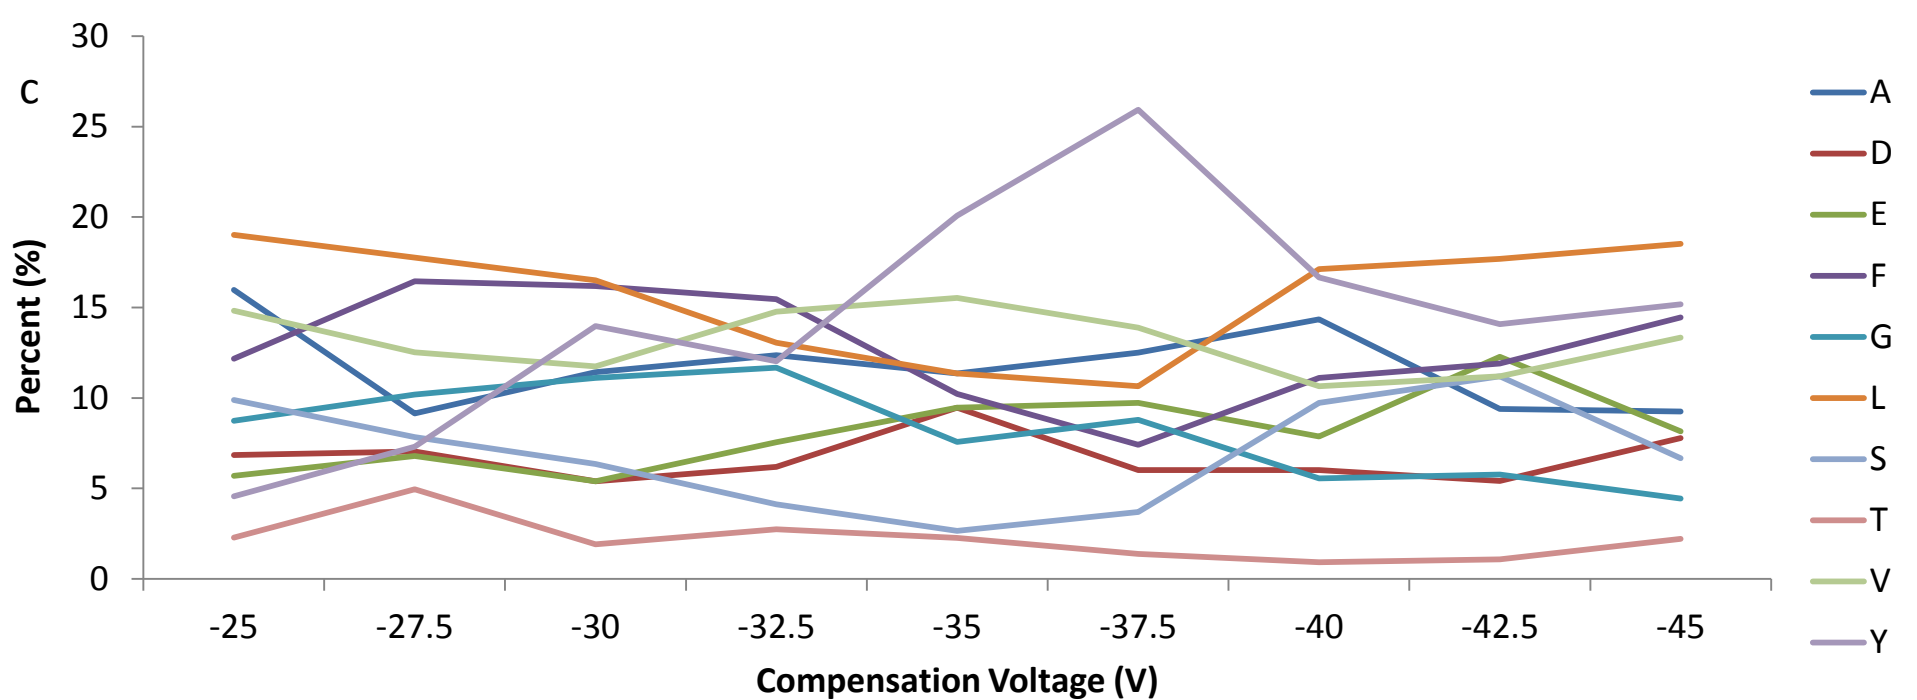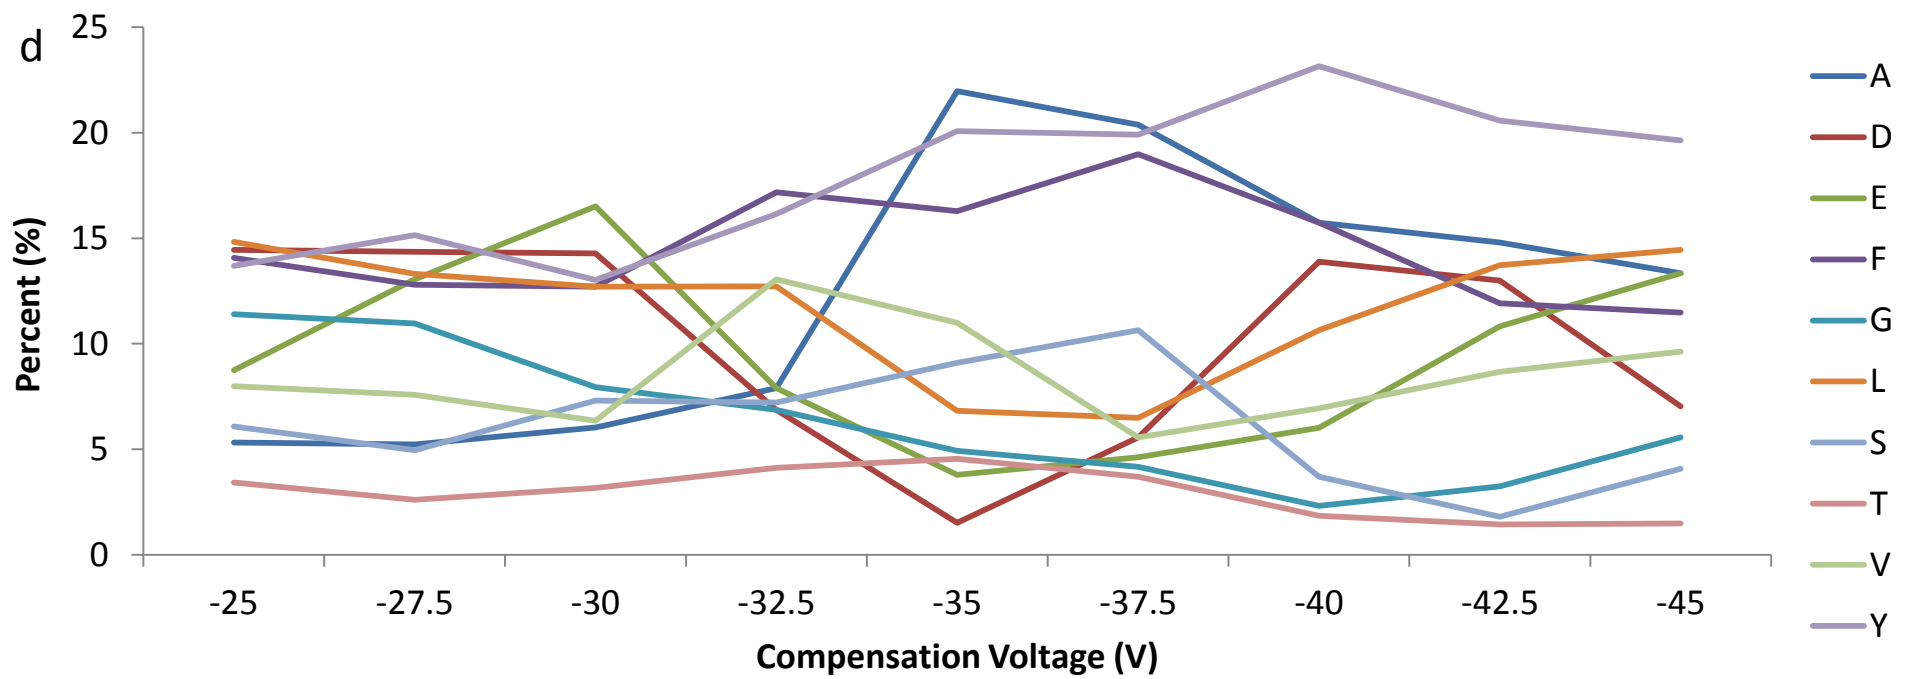

Supplement: ac400646m_si_002.pdf [file ac400646m_si_002.pdf]
